# Supplementary material for: Non-Coding Transcriptome Provides Novel Insights into the Escherichia coli F17 Susceptibility of Sheep Lamb
Source: MDPI journal article supplement (doi:10.3390/biology11030348), 2022-02-22
Supplement: s1 [file s1]

A

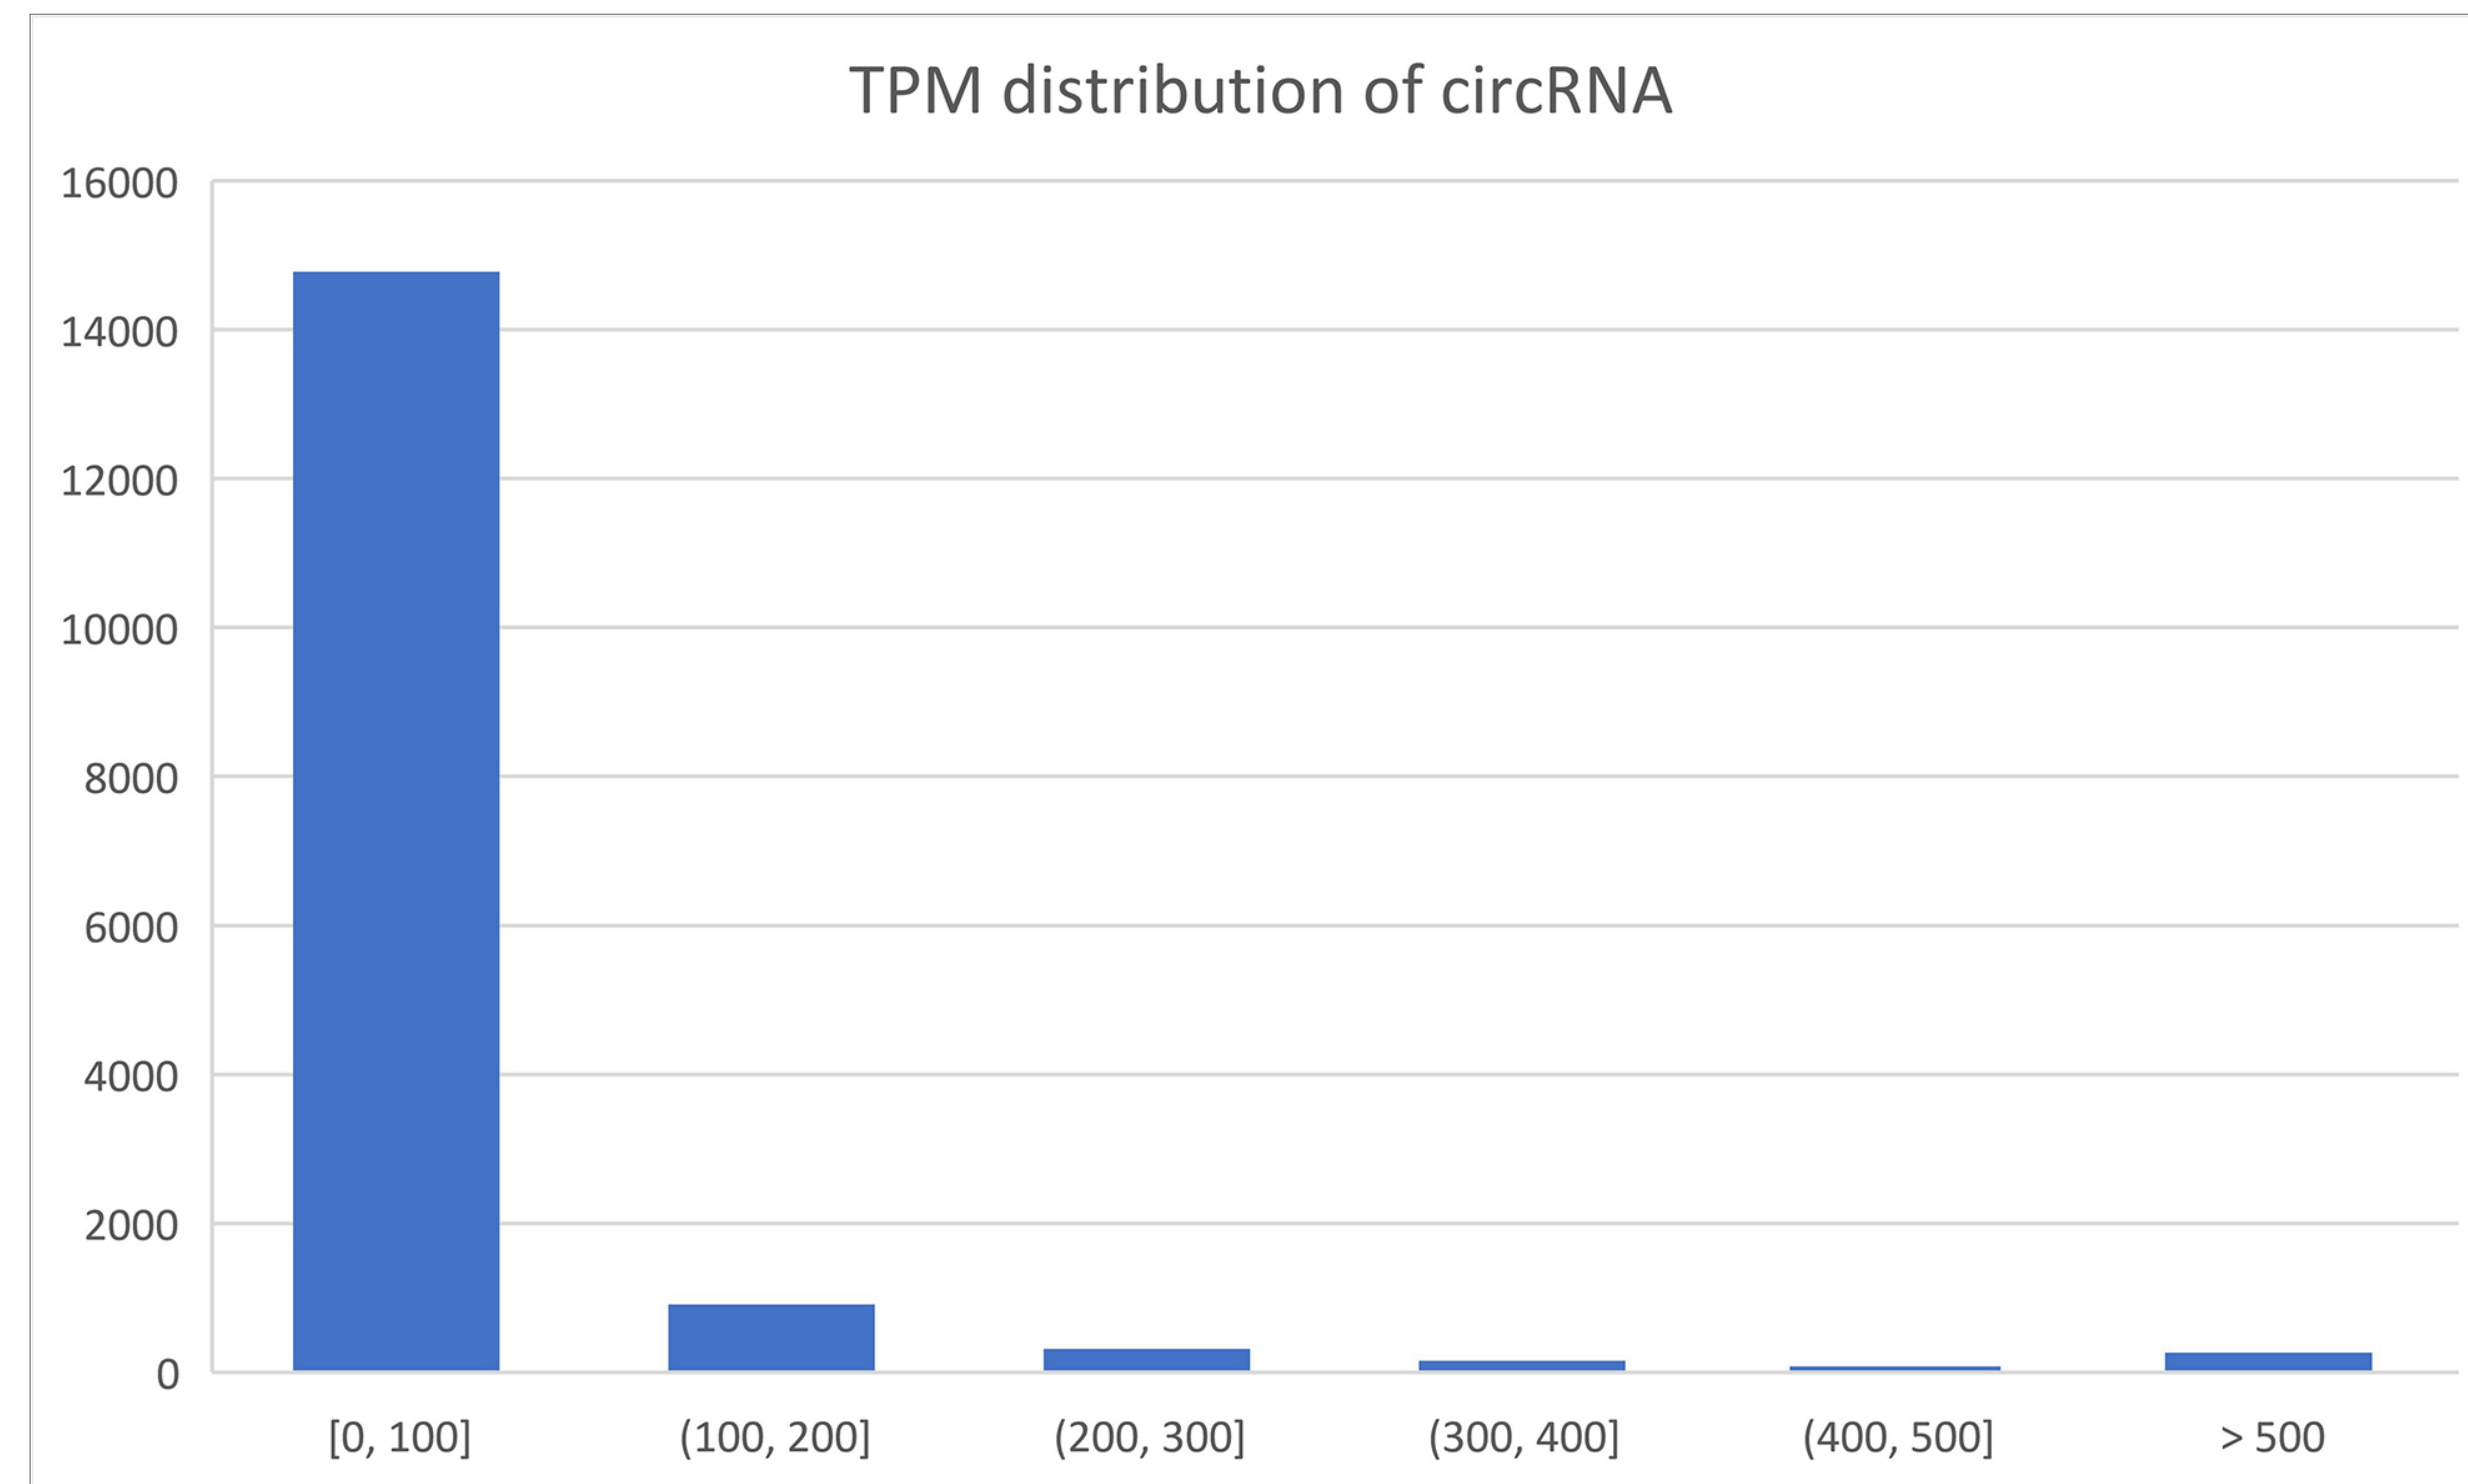

B

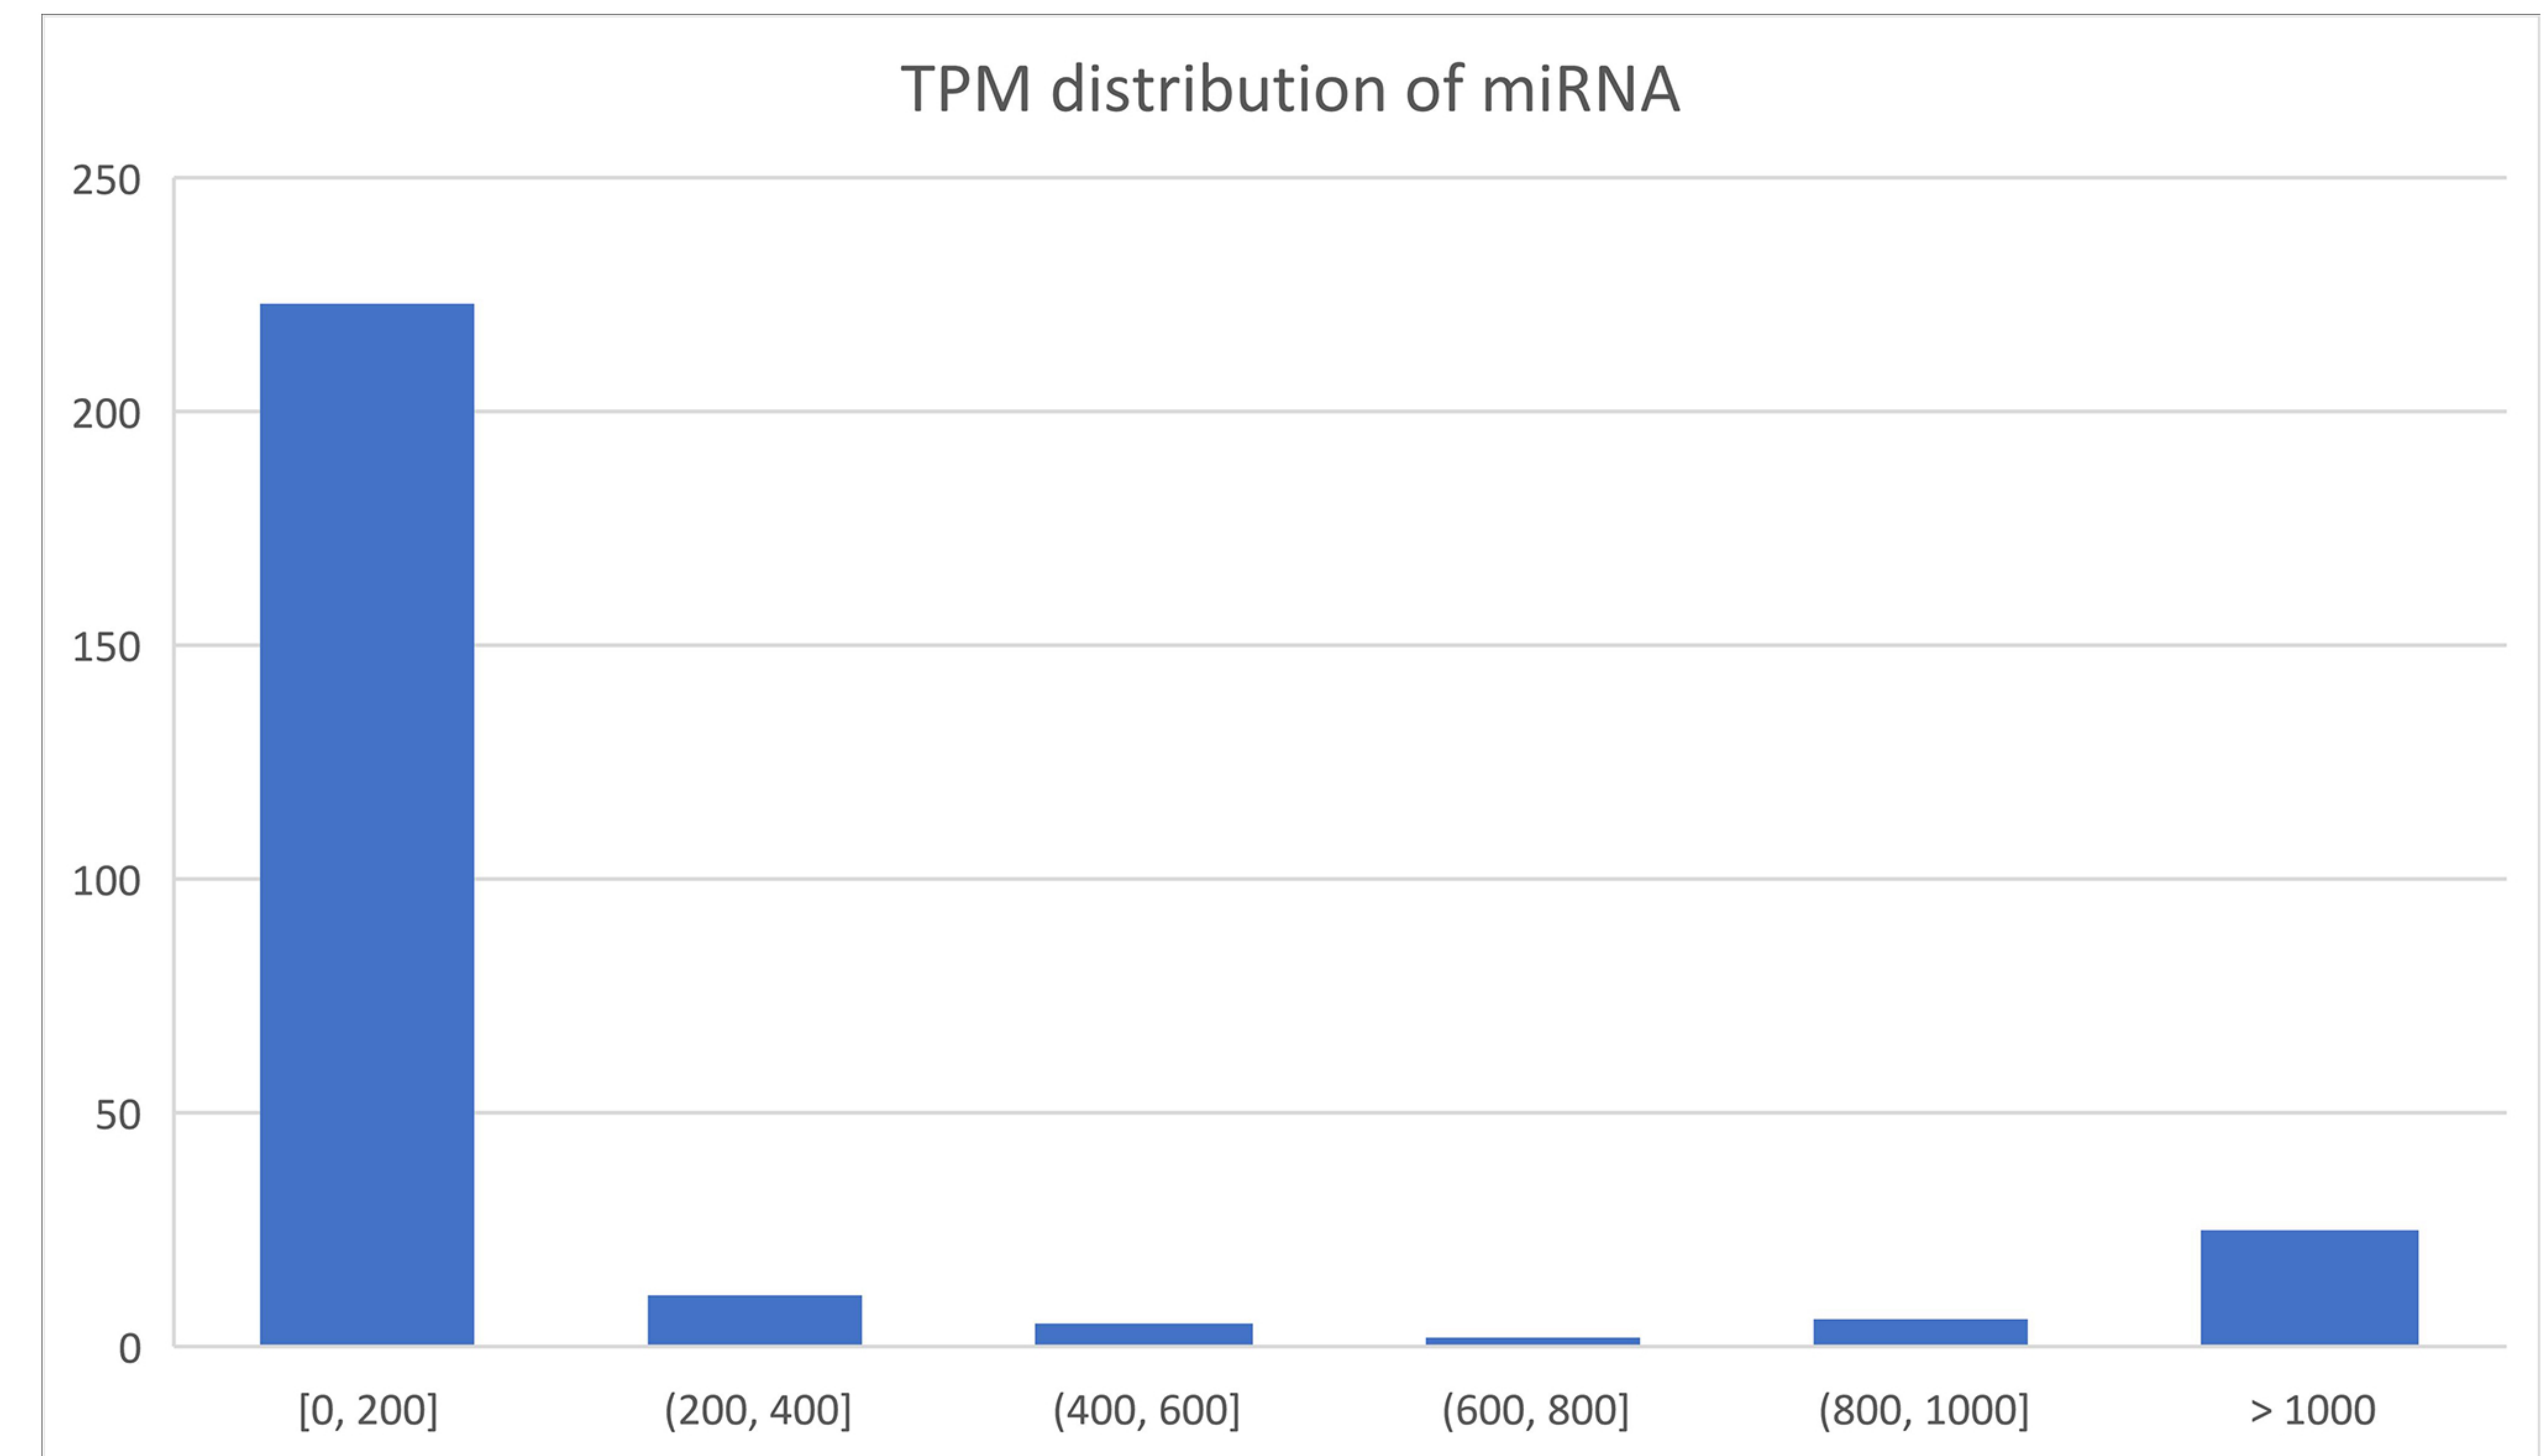

C

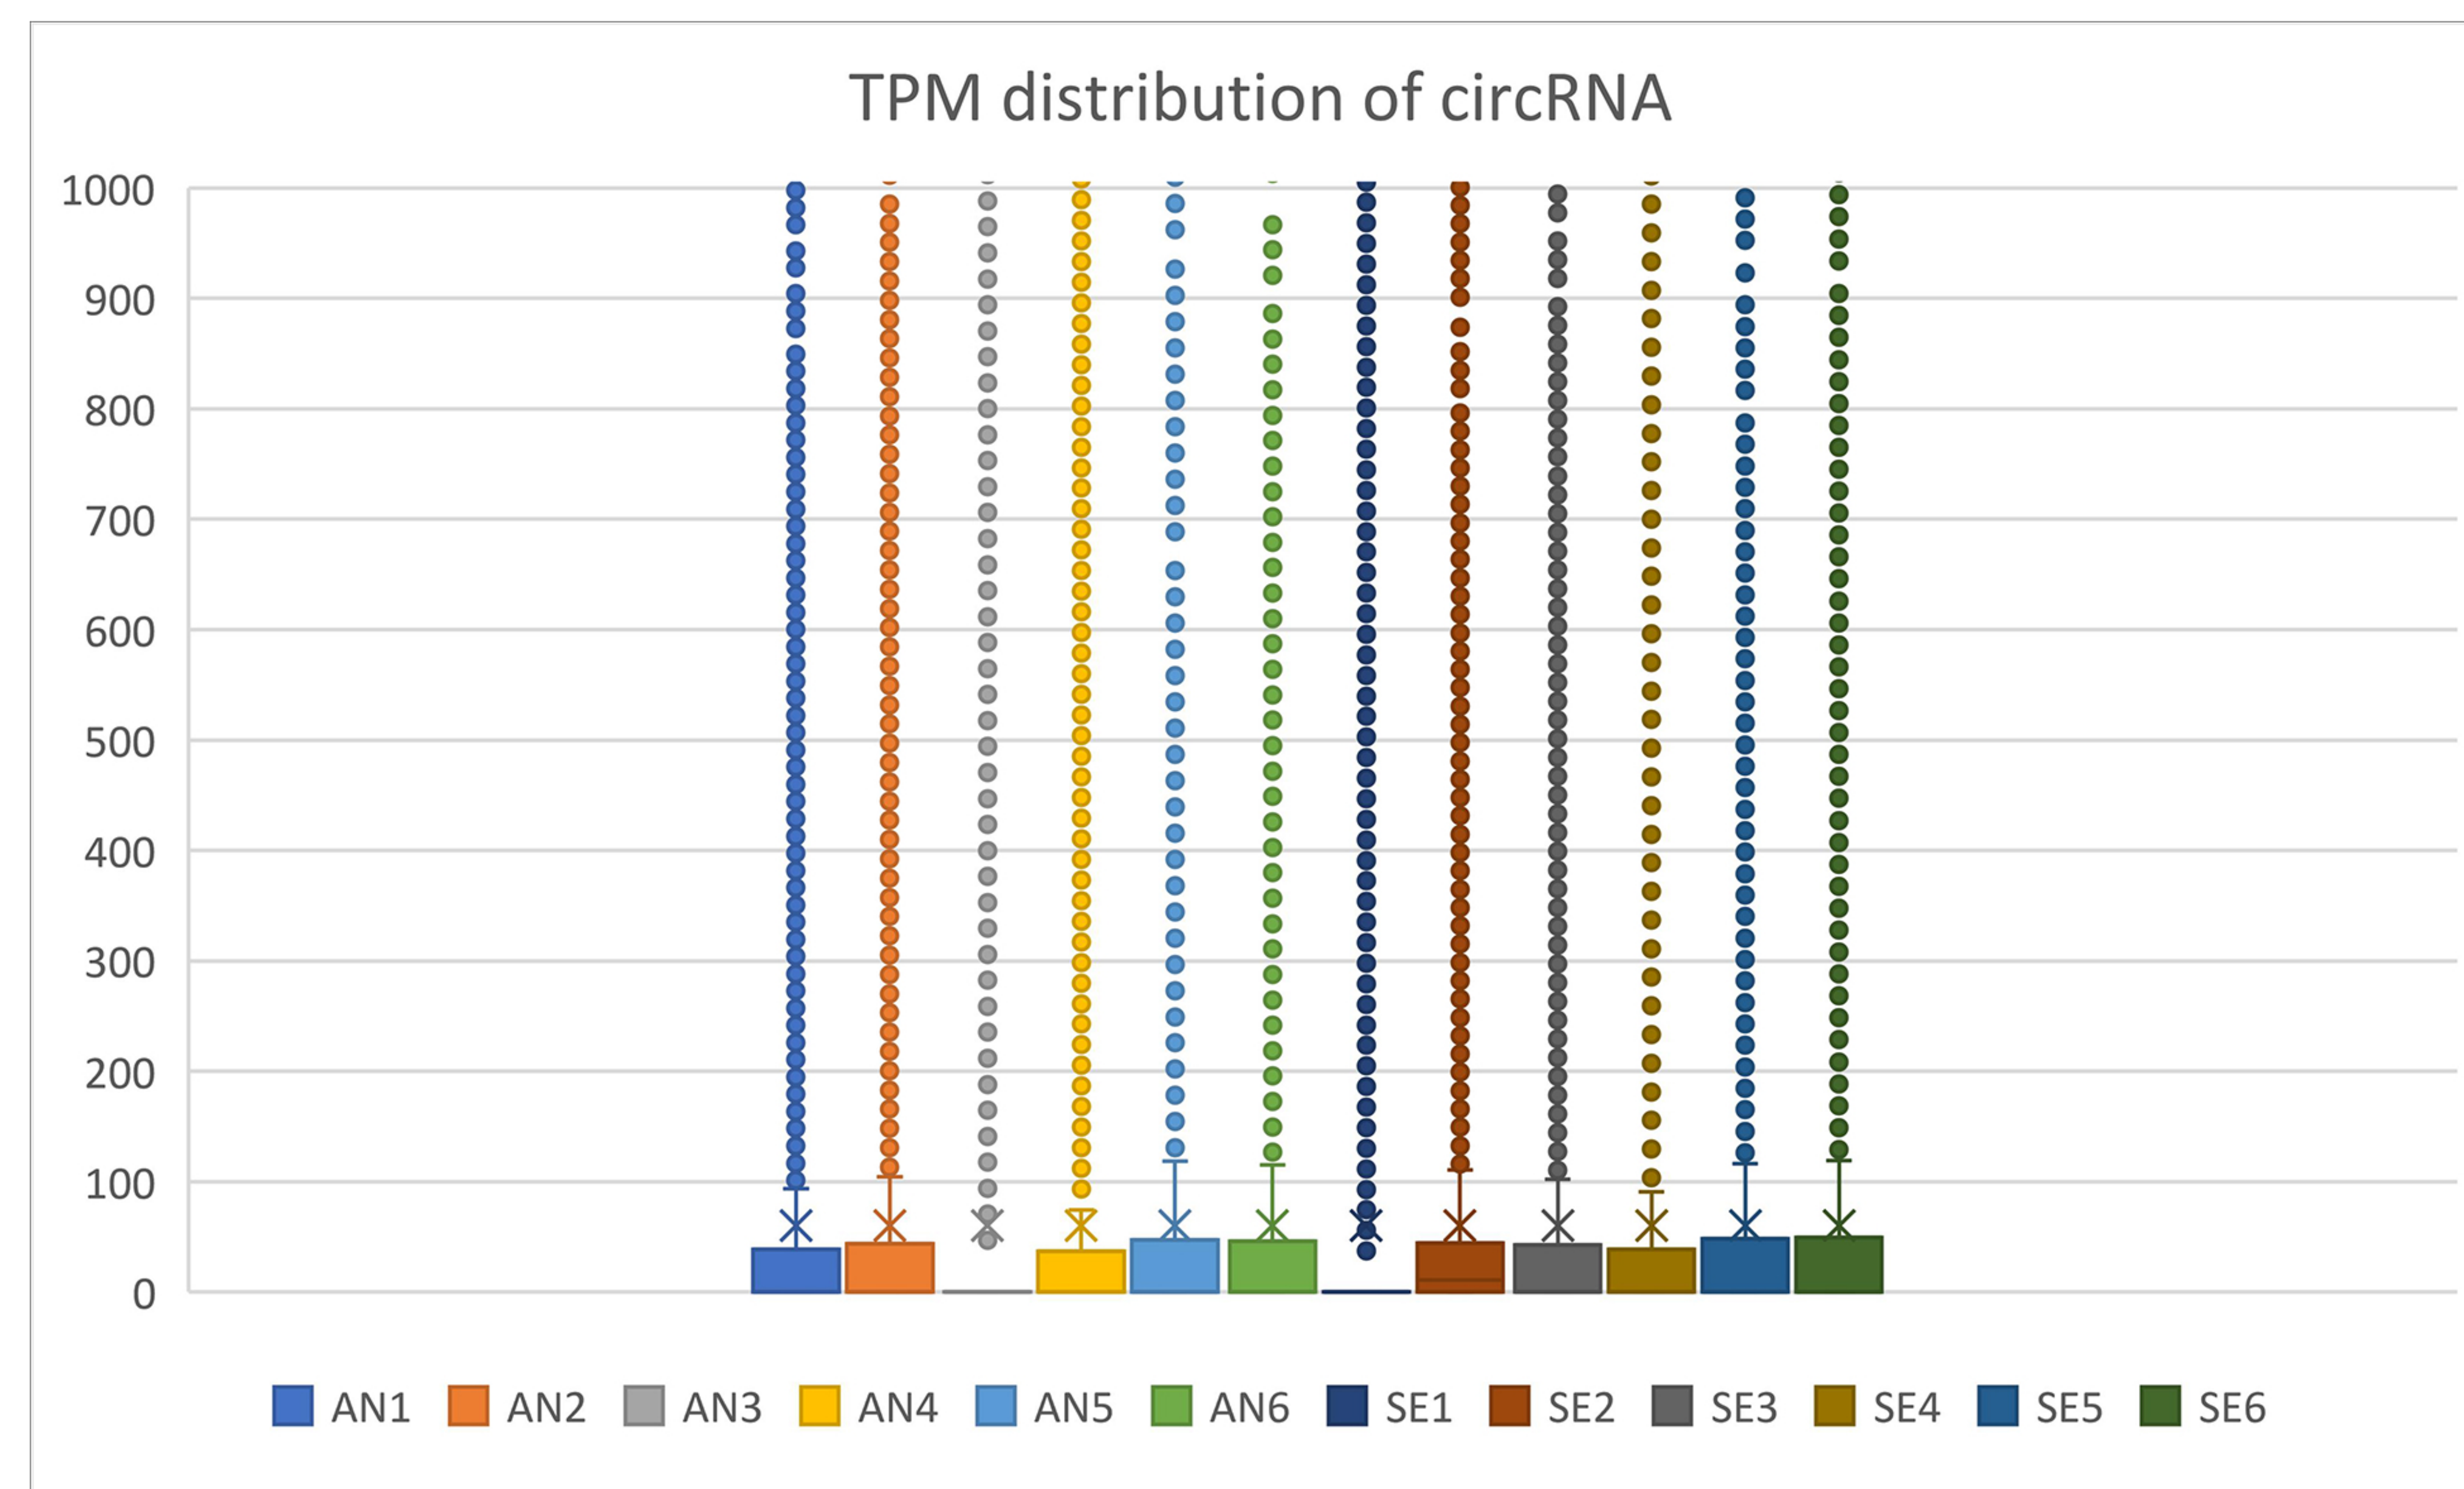

D

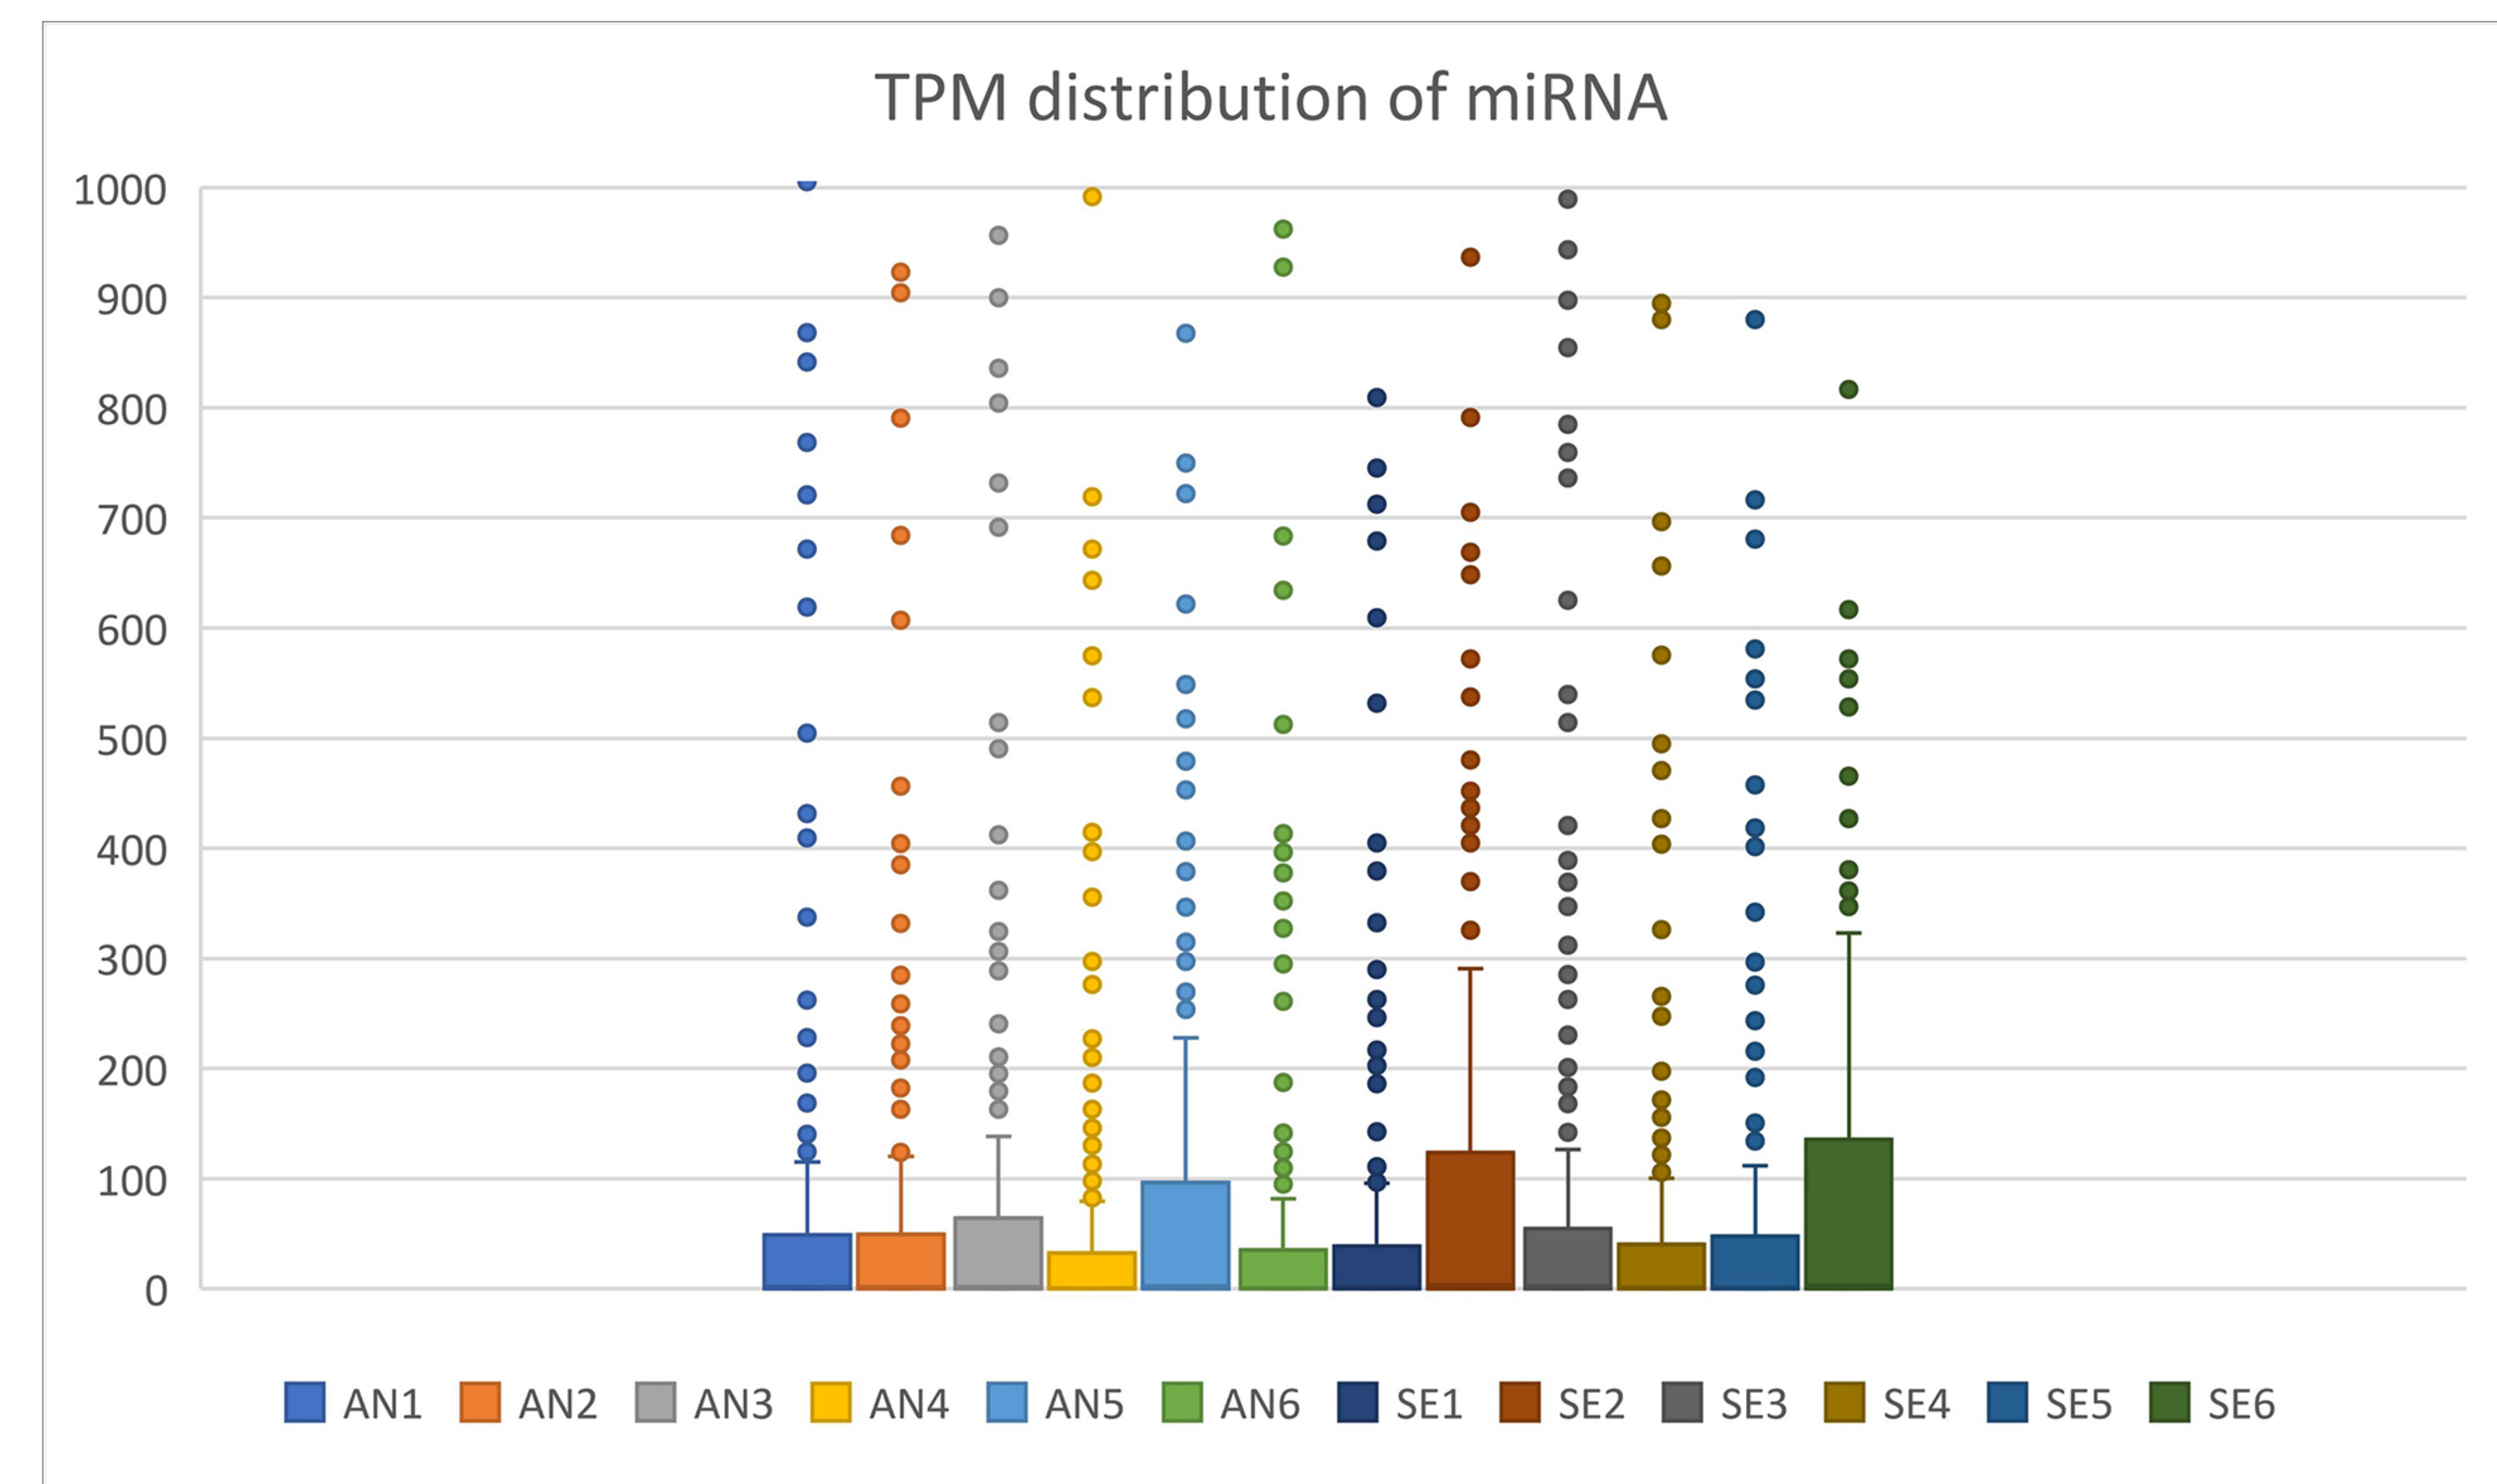

**Figure S1.** TPM distribution of the identified circRNAs (A) and miRNAs (B). TPM distribution of the identified circR-NAs (C) and miRNAs (D) between AN lambs and SE lambs.
