# Supplementary material for: Non-Coding Transcriptome Provides Novel Insights into the Escherichia coli F17 Susceptibility of Sheep Lamb
Source: MDPI journal article supplement (doi:10.3390/biology11030348), 2022-02-22
Supplement: s1 [file s1]

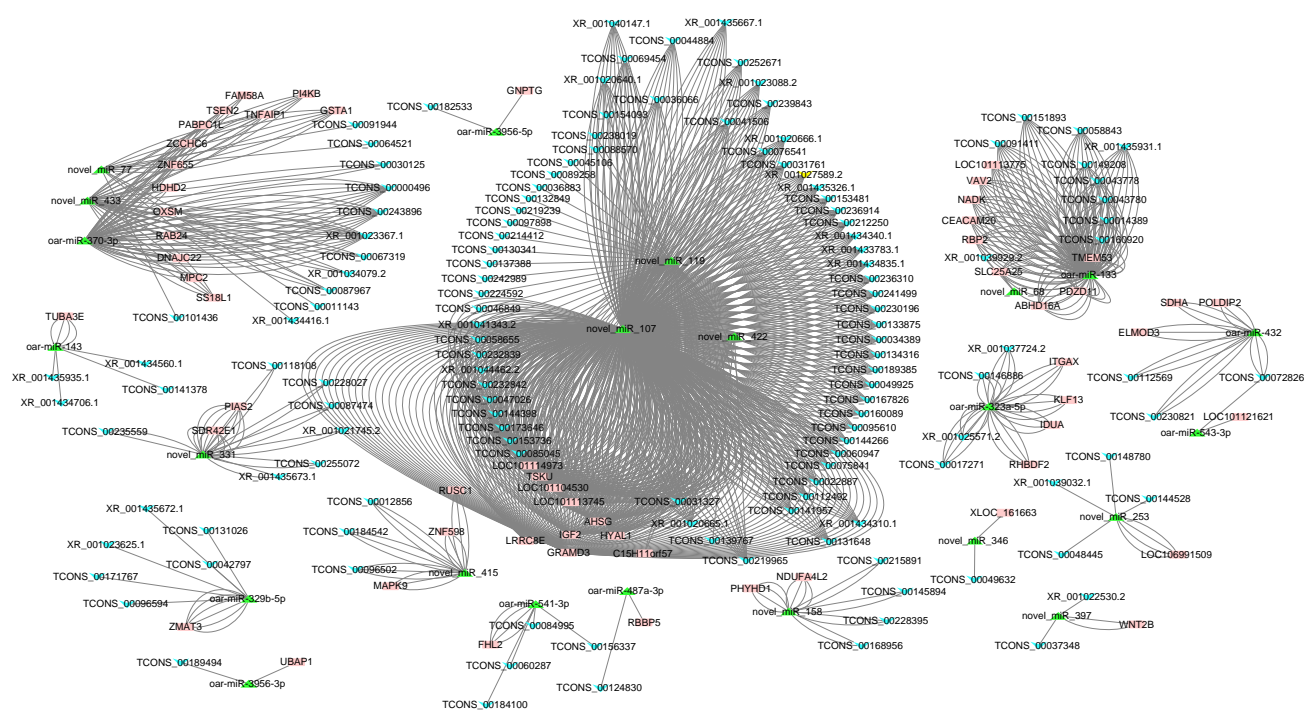

**Figure S3. Hi-res ceRNA networks of lncRNA-miRNA-mRNA**

Note: the “V” shape(blue), triangle (blue), and rectangle (red) represent lncRNAs, miRNAs, and mRNAs, respectively.
