# Supplementary material for: Non-Coding Transcriptome Provides Novel Insights into the Escherichia coli F17 Susceptibility of Sheep Lamb
Source: Biology (Basel). 2022 Feb 22;11(3):348. doi: 10.3390/biology11030348 (PMC8945857; doi:10.3390/biology11030348)
Supplement: Supplementary file 1 [file biology-11-00348-s001.zip › Supplementary Table S1.xlsx]

## Sheet: DE analysis of mRNA
Table S1: Differentially expressed analysis results of mRNAs and lncRNAs
ID	AN_FPKM	SE_FPKM	log2FoldChange	pvalue	padj
NM_001038014.1	2916.84	0	21.6485	9.72949e-39	6.70226e-34
XM_012101762.2	0	35.1731	-20.31	1.20241e-35	4.14145e-31
XM_015092455.1	0	2.53982	-19.3095	1.2696e-34	2.91525e-30
XM_012183324.2	93.1885	0	18.8298	4.15709e-30	7.15913e-26
XM_012184180.2	0	191.029	-18.8417	8.23441e-30	1.13447e-25
XM_012141698.2	0	3.82424	-18.2016	2.32296e-29	2.66699e-25
XM_015100917.1	0	1.95094	-17.975	2.43796e-28	2.39916e-24
XM_015100918.1	0	2.16949	-18.0999	8.7942e-28	7.57247e-24
XM_004004699.3	0	3.15878	-18.2903	1.77911e-27	1.36173e-23
XM_015093148.1	0	13.566	-18.0256	2.84313e-27	1.95852e-23
XM_004002972.3	0	164.123	-19.4515	8.57892e-24	4.92473e-20
XM_015093476.1	0	2.28551	-17.5476	4.95879e-22	2.43994e-18
XM_012101164.2	17.9654	0	19.2034	1.74355e-21	7.50662e-18
XM_012095497.1	4310.01	4.21349	10.1063	1.07983e-20	4.13249e-17
XM_012179554.2	28.1406	0	17.2787	2.24026e-20	8.12223e-17
XM_012145088.2	632.353	0.630926	10.0013	2.94863e-20	1.0156e-16
XM_012128411.2	3.75781	0	16.1992	3.93014e-20	1.27594e-16
XM_012177558.2	0	8.86109	-16.0667	4.07494e-20	1.27594e-16
XM_004021177.3	0	12.0823	-16.4069	2.32172e-19	6.95366e-16
XM_012181527.2	0	1.2359	-16.663	5.10349e-19	1.46483e-15
XM_004011027.3	161.008	0.346085	8.94288	8.71518e-19	2.40142e-15
XM_004006175.3	0.777537	223.74	-8.14819	1.59777e-17	4.07645e-14
XM_004012802.2	0	53.8039	-15.4543	4.51711e-17	1.11131e-13
XM_004016047.3	5633.06	3.69506	10.6405	5.7637e-17	1.3691e-13
XM_012145514.2	0	6.07217	-18.7204	6.22318e-17	1.42897e-13
XM_015097673.1	6.58101	1859.5	-8.05692	5.15878e-16	1.14635e-12
XM_012181522.2	0.0407282	17.4003	-8.65103	5.34713e-16	1.15107e-12
XM_004021036.3	969.776	1.32522	9.68969	6.14908e-16	1.28359e-12
XM_015093283.1	0	2.23543	-15.1869	6.57651e-16	1.33244e-12
XM_004003061.3	22.7532	0	17.0727	9.57747e-16	1.83265e-12
XM_015099599.1	82.7006	0.257743	8.34659	9.91279e-16	1.84555e-12
XM_012103324.2	0	0.563969	-16.3135	1.05545e-15	1.91331e-12
XM_012102029.2	0	6.33177	-16.6509	1.39943e-15	2.47182e-12
XM_012177754.2	9.39192	0	15.8927	1.86617e-15	3.13543e-12
XM_012177596.1	90.2309	0.075551	10.3066	2.18377e-15	3.4189e-12
XM_012189066.2	0	3.82896	-15.8755	2.73055e-15	4.17992e-12
XM_012141724.2	0	2.71252	-17.7031	3.02586e-15	4.5313e-12
XM_004008457.3	40.2275	0	17.9299	3.29319e-15	4.82669e-12
XM_015095334.1	0	13.4117	-14.8813	4.51071e-15	6.47343e-12
XM_004020104.3	30.9171	0.051818	9.22635	6.07767e-15	8.54421e-12
XM_004021943.3	0	0.811052	-15.7772	1.01609e-14	1.37244e-11
XM_004009588.3	5934	3.07684	10.9187	1.78654e-14	2.36668e-11
XM_012177743.2	14.6567	0	16.6832	2.00275e-14	2.60304e-11
XM_012102747.2	0	7.46693	-14.9052	2.51923e-14	3.2137e-11
XM_012169456.2	0	11.0673	-17.865	5.39385e-14	6.75565e-11
XM_004015342.3	5.49005	0	15.2768	7.96068e-14	9.62069e-11
XM_004007736.2	174.453	1.08558	7.43812	8.78104e-14	1.02659e-10
XM_012141714.2	0	3.10723	-17.865	8.88285e-14	1.02659e-10
XM_012183155.2	0.568884	0	15.1488	8.94162e-14	1.02659e-10
XM_015094957.1	0	1.60429	-14.6382	1.0025e-13	1.1321e-10
XM_012188106.2	0	0.282894	-15.3222	1.25031e-13	1.38917e-10
XM_004002815.2	80.1933	0.0518767	10.658	1.28147e-13	1.4012e-10
XM_012186949.2	0.274359	57.1445	-7.67727	1.30576e-13	1.40545e-10
XM_012176997.2	1.83231	0	18.0676	1.41581e-13	1.50045e-10
XM_004008307.3	15.0565	0.0836835	7.50444	1.76623e-13	1.82947e-10
XM_004022002.3	81.5135	0.423652	7.65213	1.77939e-13	1.82947e-10
XM_015100913.1	0.857596	0.00268917	8.29009	1.83004e-13	1.85389e-10
XM_004004728.3	812.675	0.754315	10.0232	1.96813e-13	1.96488e-10
XM_004011453.2	3.19496	0	15.2579	2.78662e-13	2.74228e-10
XM_015101906.1	16.5793	0.104165	7.45457	3.03202e-13	2.94174e-10
XM_012183271.1	6.02098	0	15.7295	4.75779e-13	4.48966e-10
XM_012153432.1	182.762	1.17819	7.35777	5.09936e-13	4.74254e-10
XM_012104137.2	0	3.26224	-14.484	5.16347e-13	4.74254e-10
XM_004019239.3	22.8349	0.0333185	9.39416	6.57099e-13	5.95591e-10
XM_015099501.1	624.886	6.61392	6.683	7.9036e-13	6.9801e-10
XM_004003898.3	0	6.89675	-17.1171	8.52115e-13	7.43023e-10
XM_012104095.2	2.38325	0	15.7295	1.3778e-12	1.17174e-09
XM_004010004.2	0.0243688	101.129	-11.8638	1.43606e-12	1.2064e-09
XM_004013925.2	16.2228	0	16.8205	1.81587e-12	1.50709e-09
XM_012102304.1	79.1725	0.0951702	9.79898	2.11437e-12	1.73393e-09
XM_004015140.2	81.8518	0.0391352	11.0639	2.19115e-12	1.75511e-09
XM_004003264.3	131.364	0.718862	7.56916	2.73039e-12	2.13734e-09
XM_012102756.1	0	4.3719	-14.0215	3.21118e-12	2.48545e-09
XM_004005990.3	44.7822	0.035166	10.307	3.81123e-12	2.91712e-09
XM_004017976.2	68.4117	0.228912	8.4025	4.76352e-12	3.57852e-09
NM_001202852.1	0.0018785	222.725	-16.4703	4.79729e-12	3.57852e-09
XM_012103883.2	0	1.13476	-14.4855	8.04626e-12	5.77369e-09
XM_004003362.2	21.0369	4304.64	-7.69075	8.3155e-12	5.90537e-09
XM_012096116.2	3.90893	0	16.0636	8.57051e-12	6.02437e-09
XM_012141753.2	0	0.949627	-16.182	9.72711e-12	6.70062e-09
XM_012177030.2	0	1.73292	-16.8844	1.14514e-11	7.81034e-09
XM_012104567.2	31.5808	0.180054	7.5935	1.34218e-11	8.97645e-09
XM_012106466.2	0	0.47198	-16.0067	1.58776e-11	1.04166e-08
XM_012121140.2	0.0423242	6.27785	-7.15284	1.69891e-11	1.10407e-08
XM_012096117.2	1.00368	0	14.1351	2.04162e-11	1.31439e-08
XM_004016718.3	32.9757	0.200088	7.34013	2.34105e-11	1.4795e-08
XM_015093526.1	0.711361	0	13.8376	2.59979e-11	1.62808e-08
XM_012172631.2	2.06389	0	13.7404	3.05882e-11	1.89829e-08
XM_012178549.2	0.990176	0.000119	12.5535	3.96319e-11	2.416e-08
XM_004020976.3	143.085	1.43926	6.73364	5.00744e-11	3.02581e-08
XM_012183604.2	76.2673	0.413519	7.50119	5.15748e-11	3.06274e-08
XM_012106292.2	0	0.314978	-14.3354	5.22833e-11	3.07828e-08
XM_012177598.1	99.4786	0.128699	9.63876	7.70637e-11	4.42384e-08
XM_004016048.2	1929.69	2.16079	9.75656	8.54719e-11	4.86596e-08
XM_012172616.2	11.6148	0.0720428	7.29528	8.82945e-11	4.98545e-08
XM_004022406.3	4.89576	294.343	-5.84398	1.08358e-10	6.0686e-08
XM_004020203.3	1.0375	0	13.8317	1.15482e-10	6.41542e-08
XM_004006312.3	12.3125	0	15.583	1.29315e-10	7.12637e-08
XM_004015341.3	969.226	0.258324	11.9774	1.39567e-10	7.63035e-08
XM_012148819.2	462.491	5.77474	6.46146	1.62932e-10	8.76855e-08
XM_004005989.3	9.76734	0.00198417	11.9425	1.72723e-10	9.2234e-08
XM_015095774.1	15.1221	0.0750143	7.7187	2.55821e-10	1.325e-07
XM_015102200.1	0	0.106574	-13.3155	2.93e-10	1.50624e-07
XM_004002779.3	0	13.9189	-13.4597	3.54842e-10	1.81064e-07
XM_015100749.1	0.319983	0	15.9278	4.27876e-10	2.16725e-07
XM_012181244.2	0	0.768916	-15.3062	4.34671e-10	2.1856e-07
XM_012162017.2	205.326	3.06621	6.13499	4.51496e-10	2.25375e-07
XM_004008602.3	298.036	4.4591	6.17204	4.81017e-10	2.38384e-07
XM_004005750.3	2.30403	0	13.5582	5.22728e-10	2.57205e-07
NM_001009758.1	172.528	2.65762	6.1543	5.71095e-10	2.75217e-07
XM_012175938.1	847.294	16.99	5.75353	5.71322e-10	2.75217e-07
XM_012098790.2	0	0.24701	-15.1276	8.67539e-10	4.12147e-07
XM_012094983.2	0.249022	62.4767	-7.90377	8.79339e-10	4.14891e-07
XM_004009676.3	591.298	10.8279	5.84554	1.04493e-09	4.76697e-07
XM_015105224.1	115.912	1.39007	6.517	1.26487e-09	5.6579e-07
XM_012097172.2	2.47999	0	18.6144	1.3595e-09	6.04197e-07
XM_004012488.3	0.0575887	16.1718	-8.02405	1.37229e-09	6.0597e-07
XM_012182481.2	0	0.199008	-12.7296	1.40605e-09	6.13626e-07
XM_015093885.1	0.129084	8.30388	-5.9499	1.40744e-09	6.13626e-07
XM_012103862.2	0	2.39463	-15.4881	1.57479e-09	6.78006e-07
XM_015100765.1	1305.07	0.456475	11.7276	1.65197e-09	7.06819e-07
XM_015094163.1	82.8518	1.65247	5.74212	1.7896e-09	7.51698e-07
XM_012183605.2	168.349	0.430959	8.72602	2.10167e-09	8.77428e-07
XM_015100927.1	0	1.07345	-12.5629	3.14893e-09	1.28353e-06
XM_012105038.2	0.7937	0	15.678	3.50218e-09	1.41082e-06
XM_012144392.2	6.83333e-06	0.259812	-10.8865	3.92097e-09	1.56831e-06
XM_004003311.3	0.005612	6.76032	-9.93297	4.04807e-09	1.60262e-06
XM_012179621.1	0	11.0984	-17.3777	4.35661e-09	1.71491e-06
XM_012106455.2	0	0.223622	-17.4115	4.66647e-09	1.81613e-06
NM_001035224.1	17.6563	750.519	-5.39891	5.85008e-09	2.25133e-06
XM_004004143.3	180.274	2.82346	6.15762	7.04506e-09	2.68125e-06
XM_012099784.1	1.91319	44.3205	-4.45334	7.38966e-09	2.79695e-06
XM_012178382.2	57.5377	1819.56	-4.94483	7.4928e-09	2.82049e-06
XM_012106453.2	0	0.1671	-16.9862	7.58573e-09	2.83995e-06
XM_012165950.2	0.66361	0	14.4812	9.55414e-09	3.48226e-06
XM_004020051.3	21.2498	0.0124937	10.9016	1.10353e-08	3.97998e-06
XM_004006364.3	54.1502	1.36375	5.40615	1.24958e-08	4.46001e-06
XM_004008262.3	17.0725	0.0142208	9.99597	1.28203e-08	4.55226e-06
XM_004002680.3	0	0.802575	-12.1651	1.36169e-08	4.81031e-06
XM_004008055.3	3.07411	99.0981	-4.90967	1.37993e-08	4.82875e-06
XM_012175010.2	2.09324	0	14.1734	1.38093e-08	4.82875e-06
XM_015105078.1	0	1.43925	-16.667	1.41397e-08	4.91934e-06
XM_004005616.3	2.0681	75.6888	-5.1013	1.55619e-08	5.33331e-06
XM_004020045.3	0	1.35891	-17.4186	1.57846e-08	5.37481e-06
XM_012105452.2	3.07046	0.0136223	7.84995	1.67822e-08	5.66695e-06
NM_001009451.1	13.1146	0.11898	6.93445	1.77834e-08	5.97573e-06
XM_015099401.1	9.0489	0.0163002	9.18155	1.79112e-08	5.98947e-06
XM_015101690.1	0	0.666196	-12.2658	1.81577e-08	6.04256e-06
XM_004016352.3	55.5901	0.0242313	11.0882	1.88321e-08	6.23688e-06
XM_004006967.3	0	1.36062	-16.9367	1.89683e-08	6.2519e-06
XM_004012610.3	24.9174	0.165769	7.18514	2.09022e-08	6.85653e-06
XM_012106442.2	4.93352	0.00231033	11.2966	2.46426e-08	8.00722e-06
XM_012104104.2	0.818853	0	14.1663	2.53735e-08	8.20599e-06
XM_004020049.3	198.102	6.18633	5.16022	2.87544e-08	9.12801e-06
NM_001308565.1	0	5.72265	-14.5978	3.00131e-08	9.48387e-06
XM_012098881.2	0.0056855	3.7823	-9.24878	3.02375e-08	9.5095e-06
XM_004004752.3	28.8349	0.0501002	9.19578	3.0405e-08	9.5095e-06
XM_004002056.3	0	5.05615	-12.648	3.05084e-08	9.5095e-06
XM_012183606.2	1.26747	0	13.8792	3.27864e-08	1.01735e-05
XM_012187330.1	1.66717	0	11.6732	3.37506e-08	1.04258e-05
XM_015097417.1	1.9294	0	13.7842	3.70723e-08	1.13985e-05
XM_012181578.2	26.7225	0.753385	5.19554	3.73728e-08	1.13985e-05
XM_012106641.2	0.477824	0	14.7473	4.07367e-08	1.23078e-05
XM_004008403.3	89.4098	2.62977	5.17851	4.54181e-08	1.34671e-05
XM_015101280.1	0	0.505244	-13.5965	4.5551e-08	1.34671e-05
XM_012175606.2	5.45523	0	16.2583	4.92696e-08	1.44425e-05
XM_012097075.2	0	0.0586213	-11.6847	4.96058e-08	1.44794e-05
XM_004004999.3	0.14439	11.0562	-6.19042	5.16852e-08	1.49596e-05
XM_012106265.2	107.086	4.87538	4.60487	5.28489e-08	1.52324e-05
XM_012178686.2	0.0312165	1.57874	-5.78836	5.47668e-08	1.57194e-05
XM_015091655.1	1.33585	0	14.4033	5.67605e-08	1.6157e-05
NM_001161379.1	183.658	0.330931	9.07232	5.83433e-08	1.65393e-05
XM_012167061.2	3.55691	0.0882238	5.40411	6.00812e-08	1.68929e-05
XM_012166444.2	0.68285	0	11.772	6.11428e-08	1.71215e-05
XM_015103307.1	40.6269	0.103521	8.7632	6.2575e-08	1.74516e-05
XM_012186137.2	1.84911	0	12.9512	6.31102e-08	1.75299e-05
XM_004022942.3	5.04854	0	13.3795	6.34181e-08	1.75446e-05
XM_004005748.3	23.9011	0.228108	6.89723	6.42552e-08	1.77051e-05
XM_004011195.2	0	0.950143	-12.3555	6.87909e-08	1.87302e-05
XM_012177188.2	2.95606	0.00160133	10.7487	7.87215e-08	2.11004e-05
XM_012099657.2	0	2.56651	-14.6393	8.57308e-08	2.28017e-05
XM_004019322.3	46.3693	0.0119283	11.9161	8.72878e-08	2.31266e-05
XM_012101761.2	0.0959805	0	11.7756	8.82132e-08	2.32822e-05
XM_012175286.2	0	0.37257	-15.8884	9.20873e-08	2.42119e-05
XM_004001852.3	4.90494	0	13.3533	9.31715e-08	2.43772e-05
XM_012186303.2	132.821	4.09403	5.08794	9.34238e-08	2.43772e-05
XM_012095545.2	2.28796	0	13.3365	9.6355e-08	2.48596e-05
XM_015097470.1	4.64512	0.0236628	7.79762	1.27335e-07	3.17812e-05
XM_012097594.2	0	0.588167	-13.6562	1.28229e-07	3.18887e-05
XM_015104683.1	0	0.17111	-13.3623	1.28898e-07	3.19398e-05
XM_012105549.2	0.160636	32.3198	-7.55713	1.30969e-07	3.23367e-05
XM_012098879.2	0.996698	0	16.0088	1.35829e-07	3.34168e-05
XM_015097077.1	0	0.416921	-13.34	1.42231e-07	3.48673e-05
XM_012102627.2	0	0.561443	-15.2868	1.48959e-07	3.63871e-05
XM_004006565.3	0.891503	0	11.2822	1.49986e-07	3.65085e-05
XM_012106180.1	0.276677	22.4368	-6.23579	1.50893e-07	3.66e-05
NM_001078657.1	4.1479	0	17.3006	1.53503e-07	3.69727e-05
XM_004008938.3	205.591	5290.3	-4.71355	1.54953e-07	3.71919e-05
XM_004020851.3	1.50207	320.336	-7.6235	1.69652e-07	4.04383e-05
XM_012166389.2	23.2172	0.746253	5.00925	1.71378e-07	4.07087e-05
XM_004011325.3	354.705	13.998	4.76817	1.72277e-07	4.07816e-05
XM_004003162.3	54.498	0.0316372	10.7939	1.73017e-07	4.08167e-05
XM_015101283.1	0	0.348757	-13.0587	1.79303e-07	4.20967e-05
XM_012183366.2	1.83935	74.4198	-5.33396	1.79665e-07	4.20967e-05
XM_015092336.1	0	0.311581	-10.8425	1.81307e-07	4.23374e-05
XM_012178074.2	46.1179	0.509657	6.63231	1.82569e-07	4.24879e-05
XM_012180392.2	0	1.17254	-15.766	1.84596e-07	4.28152e-05
XM_015092337.1	0	0.308303	-10.8288	1.8629e-07	4.3063e-05
XM_004003298.3	206.682	0.0758165	11.5207	1.88503e-07	4.34289e-05
XM_012185956.2	33.0437	0.041862	9.7657	1.9167e-07	4.37199e-05
XM_004015977.3	0	0.356785	-10.9925	2.00227e-07	4.53711e-05
XM_004017315.3	0	1.73939	-13.0325	2.09246e-07	4.72594e-05
XM_004018359.2	15.0948	0.74461	4.39912	2.37942e-07	5.33905e-05
XM_015091886.1	0.465193	0	11.4332	2.47028e-07	5.48929e-05
XM_012182485.2	0	1.46038	-15.3489	2.63818e-07	5.8248e-05
NM_001009238.1	0.0528945	105.923	-10.9322	2.77459e-07	6.1064e-05
XM_004022820.3	4.63109	0	12.8964	2.78731e-07	6.11487e-05
XM_004017091.3	6.65872	0	20.0131	2.83601e-07	6.18232e-05
XM_015095335.1	0	0.653266	-10.6808	2.85669e-07	6.20776e-05
XM_004012951.3	16.0298	0.00486833	11.6525	3.02155e-07	6.51088e-05
XM_015094173.1	0	0.567382	-15.0007	3.02454e-07	6.51088e-05
XM_012166455.2	0.538861	0	11.4633	3.16597e-07	6.79412e-05
XM_012096764.2	0.0293018	1.31852	-5.51174	3.49839e-07	7.44827e-05
XM_012183057.2	0.0654215	1.78596	-4.68485	4.02111e-07	8.41941e-05
XM_004002693.3	12.5932	0	12.6398	4.10712e-07	8.54752e-05
XM_015094320.1	0	0.046594	-13.1511	4.37798e-07	9.03566e-05
XM_015097531.1	0.519804	0	12.9447	4.39106e-07	9.03566e-05
XM_012182482.2	0	0.199342	-12.6744	4.4038e-07	9.03566e-05
XM_004004912.3	287.885	20.4773	3.94159	4.43914e-07	9.03566e-05
XM_012096118.2	0.422298	0	12.8471	4.4466e-07	9.03566e-05
XM_012189895.2	17.3957	0.0160287	10.1986	4.92207e-07	9.94315e-05
XM_015095811.1	0	0.894636	-12.619	5.36369e-07	0.000105869
XM_015102738.1	5.34894	0.103476	5.74761	5.57981e-07	0.000109507
XM_004009617.3	29.3809	1.95217	4.03807	5.73245e-07	0.000111866
XM_012189908.1	0.204	0	13.2012	6.01712e-07	0.000116271
XM_012163576.2	5.89187	0	18.3449	6.0257e-07	0.000116271
XM_012174203.2	6.88225	0.00391033	10.4363	6.07801e-07	0.000116952
XM_004001929.2	12.4531	570.855	-5.53627	6.14068e-07	0.000117829
XM_015104582.1	0	0.210804	-10.4527	6.20759e-07	0.000118453
XM_015101772.1	10.145	0.549726	4.262	7.28246e-07	0.000137065
XM_012146843.1	0.435941	0	14.6619	7.69744e-07	0.000143885
XM_015096612.1	3.33333e-06	0.0596868	-11.8205	7.70744e-07	0.000143885
XM_012101993.2	0	0.456005	-12.4619	7.75499e-07	0.000144381
XM_015102480.1	0.858232	0	12.455	7.87975e-07	0.000146308
XM_004003399.3	196.185	9.42197	4.52663	8.18314e-07	0.000151533
XM_012107025.2	0	0.13348	-14.9477	8.46164e-07	0.000155853
XM_012104098.2	1.39538	0	14.9807	8.55878e-07	0.000157221
XM_012188212.1	29.3503	0.718496	5.50935	8.59284e-07	0.000157427
XM_012099338.2	0	0.0402528	-11.2795	8.62672e-07	0.000157629
XM_004018861.3	29.5788	2.59569	3.58528	8.67667e-07	0.000158122
XM_004002974.3	22.3061	274.113	-3.56941	8.89807e-07	0.000161729
XM_012184216.2	1.3801	0	14.9743	9.27905e-07	0.000167768
XM_015104531.1	0.709409	11.9864	-3.98303	9.48757e-07	0.000169756
XM_012127295.2	0	0.18962	-12.4118	9.60724e-07	0.000171009
XM_004004802.3	0.0179955	2.65651	-7.18713	9.69066e-07	0.000171873
XM_015100471.1	1.39106	0	12.6958	9.7057e-07	0.000171873
XM_004009896.3	3.78627	0	18.815	9.91213e-07	0.000175046
XM_015104164.1	9.32977	0.0791827	6.96585	9.97943e-07	0.000175046
XM_012101119.2	10.4646	0.0603152	7.38363	9.99202e-07	0.000175046
XM_012103890.2	0	1.16651	-14.457	1.00119e-06	0.000175046
XM_004017589.3	0.00581417	0.888872	-7.26673	1.00748e-06	0.0001757
XM_015097904.1	0	0.097453	-12.2106	1.02861e-06	0.000178932
XM_012187950.2	1.15177	0.0344158	5.09311	1.03633e-06	0.00017919
XM_004004984.3	10.3378	0.198246	5.67426	1.03949e-06	0.00017919
XM_012188290.1	76.278	6.45013	3.63076	1.04233e-06	0.00017919
XM_015103727.1	0	0.43596	-14.6751	1.0799e-06	0.000184591
XM_015101807.1	0.102104	2.7768	-4.81695	1.08817e-06	0.000185085
XM_012188794.2	0	0.329432	-13.5499	1.09268e-06	0.000185394
XM_004003079.3	148.956	11.0183	3.88329	1.13625e-06	0.000192315
XM_015104421.1	0.125022	0	10.9471	1.15457e-06	0.000194936
XM_015093180.1	18.4641	1.14815	4.09839	1.24628e-06	0.000209394
XM_012139930.2	0	7.00003	-16.9334	1.27188e-06	0.000212657
XM_015102491.1	0	0.49621	-14.3389	1.27993e-06	0.000213157
XM_015100750.1	0.181769	0	14.965	1.29808e-06	0.000215279
XM_012100172.2	12.2586	0.020714	9.2425	1.32007e-06	0.000218068
XM_012188626.2	12.9803	0.0652398	7.60195	1.34233e-06	0.000220687
XM_015099088.1	8.69075	0.4311	4.38153	1.40439e-06	0.00022981
XM_015095158.1	6.17768	0.053822	6.86721	1.4045e-06	0.00022981
XM_004004278.3	0.0251657	6.08136	-7.70119	1.42399e-06	0.000232448
XM_012176185.1	0	0.492142	-14.2807	1.4331e-06	0.00023307
XM_012104093.2	0.971449	0	14.4554	1.47435e-06	0.000238969
XM_004004464.3	0.130281	0	12.0845	1.48287e-06	0.000239271
XM_004009595.3	0.105894	2.02074	-4.2459	1.4836e-06	0.000239271
XM_015105134.1	0	0.0794032	-14.1145	1.51324e-06	0.00024242
XM_012098990.2	0	0.180785	-16.6414	1.52853e-06	0.000244302
XM_012102932.1	192.536	8.50401	4.58846	1.58449e-06	0.000252076
XM_004006324.3	0	0.670408	-11.0597	1.59148e-06	0.000252605
XM_012132271.1	0.981146	0	14.1831	1.62838e-06	0.000257276
XM_012101850.2	12.9979	0.123491	6.90959	1.64877e-06	0.000259902
XM_012105429.2	1.25899	0	14.3571	1.65321e-06	0.000260008
XM_015096994.1	0	0.786584	-14.0415	1.6682e-06	0.000261766
XM_004016396.3	843.023	66.0776	3.79839	1.73611e-06	0.000271187
XM_012177108.2	0.907761	47.3109	-5.70739	1.78562e-06	0.00027815
XM_015101661.1	23.1745	1.33507	4.17498	1.86063e-06	0.00028738
XM_012181608.2	0	0.0979012	-12.3636	1.88634e-06	0.0002907
XM_015095333.1	0	0.742615	-16.4009	1.89399e-06	0.000291226
XM_012178671.2	0	0.0938947	-11.8191	2.01462e-06	0.000307034
XM_012186664.1	1.70761	163.204	-6.58589	2.09782e-06	0.000318305
XM_012174564.1	14.5912	1.08888	3.80969	2.15356e-06	0.000324618
XM_004002646.3	431.894	12.9915	5.05255	2.29021e-06	0.00034222
XM_012101036.2	0.821724	0.0222732	5.30041	2.3391e-06	0.000348769
XM_004002838.2	0	0.240674	-16.7239	2.39538e-06	0.00035639
XM_012101022.2	2.01786	0.0594003	5.16787	2.44468e-06	0.00036294
XM_015101714.1	18.7897	1.09527	4.16778	2.46975e-06	0.000364895
XM_004004461.3	0.0926577	0	9.61211	2.47374e-06	0.000364895
XM_015092585.1	0	0.394498	-14.079	2.64268e-06	0.000385686
XM_012099084.2	0	0.442403	-14.0929	2.65977e-06	0.000387359
XM_015103518.1	0	0.0636763	-13.8262	2.92527e-06	0.000422587
XM_015091669.1	5.65421	0.0624202	6.52123	2.93981e-06	0.000423073
XM_012178915.2	19.4078	0.591277	5.18563	2.94185e-06	0.000423073
XM_012100767.2	3.14638	0.00551417	9.27632	3.08473e-06	0.000441777
XM_015095348.1	6.24239	0.00681117	9.89607	3.11582e-06	0.000445304
XM_004002035.3	5.51804	0.01323	8.73733	3.24418e-06	0.000457968
XM_004011348.3	0.21052	3.43878	-3.95564	3.25097e-06	0.000457968
NM_001009732.1	6.30004	0.342087	4.20872	3.29168e-06	0.000461814
XM_015091788.1	3.19351	0.23868	3.84349	3.30985e-06	0.000462708
XM_004011922.3	0	1.74538	-9.91679	3.31362e-06	0.000462708
XM_012163475.2	0.96881	0	11.852	3.3182e-06	0.000462708
XM_012181394.2	0	0.580854	-13.6153	3.38574e-06	0.000471172
NM_001166199.1	0	0.531268	-13.7097	3.39271e-06	0.000471191
XM_012103287.2	0.0915645	0	11.6343	3.48286e-06	0.00047984
XM_015098402.1	7.73271	0.0877698	6.56422	3.49e-06	0.000479865
XM_012095269.2	0.412655	0	13.529	3.56414e-06	0.000486178
XM_012178126.2	0	1.06547	-15.0729	3.5748e-06	0.000486667
XM_012184781.2	1.13456	0	14.3723	3.64643e-06	0.000492525
XM_015104562.1	82.9963	7.48583	3.55	3.73895e-06	0.000503049
XM_004020074.3	6.93832	0.355373	4.33139	3.78976e-06	0.000507901
XM_012097349.2	0.257822	0	13.6826	3.8099e-06	0.00050961
XM_015095182.1	1.18468	0	15.946	3.91219e-06	0.000520261
XM_004010353.3	108.586	8.70454	3.83222	4.02064e-06	0.000530712
XM_015093412.1	0	0.441377	-13.7533	4.08134e-06	0.000537566
NM_001143664.1	0.206195	0	13.8094	4.14836e-06	0.000544313
XM_015099025.1	1.89931	0	13.1871	4.314e-06	0.000563897
XM_015098850.1	0	0.115816	-13.8514	4.36057e-06	0.000568905
XM_015101525.1	0	0.129569	-12.0117	4.41944e-06	0.000575496
XM_012106284.2	0.112925	0.000258667	8.59108	4.45767e-06	0.000579379
XM_012184199.2	1.18622	0	15.8095	4.59696e-06	0.000594121
XM_015096064.1	0	0.698784	-11.8356	5.07046e-06	0.000646822
XM_004005496.2	32.471	0.0390865	9.55389	5.19638e-06	0.000660438
XM_004023073.2	0.00118167	0.839866	-8.61033	5.47086e-06	0.000690231
XM_012165959.2	0.345805	0	13.5361	5.56661e-06	0.000699946
XM_012187616.2	0.000278167	0.197223	-9.47551	5.57835e-06	0.000699946
XM_004003053.2	0	1.12127	-12.3183	5.71507e-06	0.000713204
XM_012186321.2	9.27698	0	13.7388	5.74639e-06	0.000715463
XM_012187377.2	0.154027	0	15.7	5.75395e-06	0.000715463
XM_012175143.1	1.102	0.0040825	8.10754	5.77375e-06	0.000716632
XM_015103197.1	0.411546	7.26441	-4.07973	5.83044e-06	0.000719596
XM_004013988.3	0.450542	6.42491	-3.82254	5.83779e-06	0.000719596
XM_015103905.1	0.194494	5.08711	-4.64101	5.8464e-06	0.000719596
XM_004004744.3	0	0.171556	-15.6952	5.99062e-06	0.000731684
XM_012177788.2	9.24193	0.670775	3.87377	6.0549e-06	0.000738226
XM_015095146.1	0.0304422	0.50043	-4.03918	6.07987e-06	0.000738657
XM_012099666.2	0	0.207787	-13.5752	6.34341e-06	0.00076724
XM_015104560.1	20.2579	1.04484	4.37862	6.39801e-06	0.000770172
XM_015094645.1	0	0.151085	-9.27344	6.40636e-06	0.000770172
XM_012189362.2	0	0.0793473	-11.4307	6.569e-06	0.000782397
XM_004017506.3	5.38832	0.0196525	8.25895	6.57285e-06	0.000782397
XM_012178955.2	0	0.360294	-15.6054	6.5762e-06	0.000782397
XM_012179720.2	102.752	9.47659	3.56406	6.70641e-06	0.000792415
XM_012106936.2	4.92167	0	15.4905	6.77519e-06	0.000798567
XM_012186487.1	5.70859	0.00651033	9.73556	6.80214e-06	0.000798567
XM_012189893.2	206.826	19.6261	3.5525	6.80972e-06	0.000798567
XM_004017501.3	1.95322	0	14.5065	6.81122e-06	0.000798567
XM_015098328.1	0.685374	10.266	-3.82499	6.81644e-06	0.000798567
XM_015102481.1	0.801834	0	11.6825	6.87956e-06	0.00080323
XM_004013927.3	53.4459	0.0716922	9.56426	6.95188e-06	0.000809774
XM_012184449.2	7.63333e-05	0.664045	-12.4528	7.00413e-06	0.000813252
NM_001114667.1	3.89247	201.213	-5.64187	7.03623e-06	0.000813252
XM_004004660.3	161.706	17.7477	3.32401	7.29995e-06	0.00084091
XM_012099698.2	0.168895	0	13.6597	7.34766e-06	0.000844994
XM_012096006.2	0.480879	0	15.484	7.43322e-06	0.000851988
XM_012185413.1	0	0.469216	-13.0519	7.94125e-06	0.000905696
XM_012104096.2	0.161919	0	11.7955	8.18066e-06	0.000926714
XM_015102893.1	0.0005295	24.9042	-15.1003	8.26907e-06	0.000933808
XM_012104911.2	22.2759	1.11676	4.47591	8.40157e-06	0.000945671
XM_004018867.3	18.668	1.47284	3.78094	8.57345e-06	0.000961874
XM_012179568.1	1.87298	0	15.8104	8.65046e-06	0.000967363
XM_012098847.2	32.2081	2.74074	3.67876	8.72937e-06	0.000974605
XM_015100748.1	0.0316327	0	12.2855	8.80737e-06	0.000980137
XM_004011867.3	1.18654	0	15.3126	8.86821e-06	0.00098268
XM_004004862.3	24.9542	0.096482	7.91784	8.90263e-06	0.000984073
XM_015092198.1	0.0995957	0	11.058	8.91417e-06	0.000984073
XM_012182497.2	0.208317	0	13.3438	9.2386e-06	0.00101663
XM_004008073.3	0.156395	0	14.4533	9.36198e-06	0.00102512
XM_012188255.2	0.120262	0	13.4533	9.37529e-06	0.00102512
XM_004003233.3	107.63	9.32689	3.5981	9.52058e-06	0.00103771
XM_004004298.3	0.273435	3.24864	-3.5211	9.56408e-06	0.00104081
XM_012190052.2	0	0.850146	-11.1188	9.7423e-06	0.00105601
XM_004007765.3	10.4588	0.0615208	7.41858	9.74975e-06	0.00105601
XM_012100452.2	0.296955	0	13.6242	9.91236e-06	0.00107194
XM_012102763.2	0	0.677292	-13.076	9.97199e-06	0.00107652
XM_012177217.2	0.000797167	0.48096	-9.09628	9.98602e-06	0.00107652
XM_012100061.1	0.576868	0	13.1749	1.0073e-05	0.0010842
XM_012148618.2	0	0.640407	-12.9745	1.07799e-05	0.00114951
NM_001308571.1	19.3422	0.984653	4.37075	1.08766e-05	0.00115803
XM_015095349.1	0.834989	0	15.146	1.11255e-05	0.00117777
XM_015100914.1	0.0133123	0	10.8412	1.11304e-05	0.00117777
XM_012177447.2	0	0.264956	-15.0309	1.12986e-05	0.00119373
XM_012181243.2	0	0.601501	-14.9828	1.14637e-05	0.00120932
XM_004010298.3	40.0075	2.39875	4.13153	1.16251e-05	0.00122174
NM_001009404.1	315.763	33.3111	3.34218	1.17061e-05	0.00122552
XM_012181174.2	0	0.54284	-13.1841	1.19195e-05	0.00124219
XM_012105736.2	1.13482	0	15.1635	1.20684e-05	0.00125189
XM_012102467.1	9.88719	0.017718	8.82402	1.20872e-05	0.00125189
XM_012144690.2	1.16667e-06	0.234166	-12.3998	1.21035e-05	0.00125189
XM_012100482.2	1.39126	0	12.9057	1.22705e-05	0.00126537
XM_004003198.2	1.21649	24.7126	-4.27167	1.22889e-05	0.00126537
XM_012187475.2	0	0.828808	-13.5898	1.23697e-05	0.00127179
XM_004013796.3	37.3121	3.02305	3.7158	1.26268e-05	0.00129052
XM_004013592.3	0	0.042272	-12.9325	1.28538e-05	0.00130984
XM_015094220.1	286.757	27.3182	3.45659	1.28967e-05	0.00131226
XM_012106279.2	0	0.0408425	-9.4747	1.29586e-05	0.00131468
XM_012174384.2	0	0.053202	-9.20366	1.32094e-05	0.00133619
XM_012181421.1	0	0.339279	-12.9082	1.32578e-05	0.00133912
XM_015104881.1	0	0.0463915	-11.1058	1.35944e-05	0.00136312
XM_015099184.1	48.4382	3.97123	3.71596	1.36268e-05	0.00136416
XM_012095034.2	0	0.207296	-8.9666	1.36519e-05	0.00136416
XM_004014391.3	0.769603	170.88	-7.77719	1.36642e-05	0.00136416
XM_012174667.2	0	0.116368	-12.4799	1.36978e-05	0.00136554
XM_012187157.2	0	0.287699	-14.8659	1.3745e-05	0.00136754
XM_012182850.2	0	0.174893	-14.8691	1.37576e-05	0.00136754
XM_012132357.2	0.486082	0	13.1424	1.40161e-05	0.00138922
XM_012182469.2	0	0.361997	-12.7549	1.40369e-05	0.00138929
XM_004003001.2	0	2.77283	-14.8328	1.41206e-05	0.00139557
XM_012106502.2	2.82807	0.0102317	8.30407	1.44103e-05	0.00142013
XM_004004376.3	0.891085	0	19.7325	1.45075e-05	0.00142562
XM_015095473.1	0	3.85555	-14.8733	1.46904e-05	0.00143912
XM_012103384.2	0.0730165	0	13.0086	1.47074e-05	0.00143912
XM_012179486.2	0	0.278745	-13.4851	1.48543e-05	0.00144989
XM_004012451.3	0	0.339944	-9.43358	1.48807e-05	0.00144989
XM_015103489.1	446.946	50.5926	3.2515	1.5024e-05	0.00146179
XM_015093170.1	0.118931	0	12.7499	1.50855e-05	0.0014657
XM_012105786.2	130.374	13.6839	3.34602	1.52811e-05	0.00147884
XM_012178599.2	0.000662333	1.50454	-9.21535	1.53576e-05	0.00148327
XM_004006092.3	6.86031	0.106924	6.1587	1.5374e-05	0.00148327
XM_004002528.2	76.4763	1105.05	-3.89117	1.72143e-05	0.00164242
XM_012181458.1	0.098282	0	12.8424	1.72966e-05	0.00164798
XM_015098169.1	89.2002	0.0431108	10.9516	1.74048e-05	0.00165601
XM_004014563.3	0.471807	0	12.6711	1.77429e-05	0.00168352
XM_004012200.3	0	0.0453062	-14.6646	1.78051e-05	0.00168458
XM_012108118.1	0	0.37968	-8.82253	1.79727e-05	0.00169366
XM_012099333.2	0.607033	0	15.1997	1.8307e-05	0.0017228
XM_012127373.2	0	0.133107	-12.7124	1.8634e-05	0.00174642
XM_012108278.1	125.098	0.387814	8.39554	1.8684e-05	0.00174873
XM_012097812.2	0	0.430971	-14.6402	1.8723e-05	0.00175
XM_015100586.1	0	9.26059	-14.7798	1.9133e-05	0.00178107
XM_012185941.2	0.551812	0	10.5494	1.95489e-05	0.00180481
XM_012188262.2	0	0.0686055	-12.5917	1.98294e-05	0.00181886
XM_012101284.2	10.5281	0.654837	4.16898	1.98969e-05	0.00182205
XM_012174204.2	0.603127	0	10.5377	1.99435e-05	0.00182205
XM_012101417.1	3.94437	42.4251	-3.42645	2.00633e-05	0.00183057
XM_012178073.2	58.5245	0.776227	6.40304	2.01077e-05	0.0018322
XM_012095509.2	4.51578	0	14.6934	2.0374e-05	0.00185115
XM_015102113.1	0	0.0188932	-12.7188	2.03963e-05	0.00185115
XM_012106443.2	28.1724	0.110689	8.11716	2.0509e-05	0.00185893
XM_012177247.2	0.531409	0	14.8785	2.07579e-05	0.00187901
XM_012176246.2	26.5357	367.059	-3.73825	2.08502e-05	0.00188489
XM_015102991.1	27.2047	2.98838	3.2581	2.09063e-05	0.00188748
XM_012104597.2	0	0.174648	-10.1738	2.1292e-05	0.00191228
XM_012107656.2	0	0.499041	-12.55	2.14091e-05	0.00191968
XM_004009876.3	2.99211	0.0147978	7.72177	2.19321e-05	0.00195955
XM_015100734.1	0.0540783	0	13.1267	2.20652e-05	0.00196889
XM_012141269.2	0.077485	0	12.6837	2.22153e-05	0.00197716
XM_012162350.2	0.301068	14.8224	-5.65009	2.27503e-05	0.00201955
XM_015102693.1	18.1516	1.26634	3.90234	2.29621e-05	0.00203574
XM_015093093.1	0	1.81349	-14.4927	2.32133e-05	0.00204746
XM_015103777.1	0	0.349571	-14.6671	2.35599e-05	0.00207538
XM_012101391.1	1.93909	0	18.1837	2.38434e-05	0.00209767
XM_015104049.1	7.00609	0.197038	5.24125	2.41057e-05	0.00211804
XM_015098176.1	0.0986385	5.23025	-5.67736	2.42113e-05	0.00212461
XM_015099207.1	0	0.0720548	-14.0314	2.43717e-05	0.00213597
XM_004021546.2	2.05982	37.1881	-4.17067	2.448e-05	0.00214273
NM_001145188.1	0	24.5835	-17.9117	2.45699e-05	0.00214787
XM_012108244.2	11.9574	0.01798	9.28486	2.47231e-05	0.00215852
XM_004015314.3	28.1294	0.695861	5.34882	2.49259e-05	0.00217348
XM_012104256.2	53.0762	5.45654	3.41156	2.55676e-05	0.0022136
XM_004004156.2	53.5147	6.66273	3.0837	2.55779e-05	0.0022136
XM_012103910.2	0	0.400874	-12.9483	2.56015e-05	0.0022136
XM_012178350.2	0	0.565844	-12.2867	2.57244e-05	0.0022136
XM_012177002.2	0.0539403	0	12.7679	2.57331e-05	0.0022136
TCONS_00241928	0.024344	4.21616	-7.26497	2.57395e-05	0.0022136
XM_015099378.1	0	0.219903	-14.7958	2.58441e-05	0.00221982
XM_004004163.3	0	0.607831	-12.2763	2.61269e-05	0.00223737
XM_012097267.2	0	1.01122	-18.169	2.61458e-05	0.00223737
XM_012100978.1	0	3.9092	-14.3357	2.62395e-05	0.0022426
XM_004005754.3	9.9759	0.452058	4.63542	2.6595e-05	0.00226176
XM_015103789.1	1.42262	1.66667e-07	16.4504	2.66692e-05	0.00226527
XM_004012902.3	0.0115732	2.75674	-7.84472	2.67723e-05	0.00227123
XM_012139392.2	0.0605877	0	14.6737	2.75777e-05	0.00232976
XM_004020038.3	0	2.65337	-17.2748	2.77694e-05	0.0023414
XM_004016941.3	0	0.148993	-10.1679	2.78226e-05	0.00234302
XM_012174202.2	7.46248	0.122456	6.03224	2.81888e-05	0.00237095
XM_012140794.2	0	0.508881	-14.2675	2.84591e-05	0.00238786
XM_012099779.2	0.295127	0	14.9068	2.92782e-05	0.0024536
XM_012105719.1	35.1264	3.31318	3.51961	3.03021e-05	0.00252405
XM_004013909.3	75.3029	8.00343	3.35422	3.06995e-05	0.00255098
XM_004015122.3	3.28652	60.5334	-4.17187	3.21233e-05	0.00265329
XM_015092099.1	0	0.568236	-14.1836	3.22178e-05	0.00265521
XM_004004565.2	0	0.991716	-10.0553	3.22666e-05	0.00265557
XM_015104850.1	0	0.230054	-14.35	3.24305e-05	0.00266588
XM_015093276.1	0.411479	0	12.8706	3.25566e-05	0.00267305
XM_012188260.2	0	0.216345	-14.174	3.26335e-05	0.00267414
XM_012104136.2	0	0.714317	-12.2196	3.26493e-05	0.00267414
XM_012183371.1	8.18859	0.714063	3.66107	3.26863e-05	0.00267414
XM_004001934.3	30.915	2.79886	3.49144	3.32748e-05	0.00271584
XM_004021983.3	8.37167	0.317715	4.96225	3.33929e-05	0.00272225
XM_015104114.1	0.0177932	0	7.9053	3.35703e-05	0.00273348
XM_004020671.3	15.2518	0.0263057	8.98931	3.38189e-05	0.00275047
XM_012178603.2	6.68333e-05	0.596216	-8.62715	3.40242e-05	0.0027639
XM_012098814.2	0	0.28666	-14.3622	3.4103e-05	0.00276705
XM_012188395.2	0.193779	0	12.5301	3.42703e-05	0.00276977
XM_004018227.3	275.656	31.557	3.2351	3.42871e-05	0.00276977
XM_012187858.1	3.59575	0.0175635	7.59583	3.42974e-05	0.00276977
XM_012096238.2	0	0.171935	-12.7307	3.50085e-05	0.00281728
XM_015095948.1	0	5.14003	-16.759	3.51514e-05	0.00282219
XM_012102565.2	0.008464	0.875764	-6.94245	3.52592e-05	0.00282755
XM_015095944.1	1.15291	13.5888	-3.46881	3.60161e-05	0.00288154
XM_012103839.1	0	0.651604	-11.228	3.6197e-05	0.00289265
XM_004004676.3	5.17026	0.255355	4.4378	3.65041e-05	0.00290984
XM_004010651.3	44.972	5.18976	3.25119	3.65388e-05	0.00290984
XM_012100182.1	0.161637	11.2965	-6.09745	3.678e-05	0.00292567
XM_004020007.3	31.7858	3.39684	3.32913	3.68627e-05	0.00292886
XM_012102623.2	0.00189167	0.570588	-8.0019	3.70861e-05	0.00294322
XM_015093143.1	0.571915	0	15.1808	3.73808e-05	0.00296319
XM_012099580.2	0	0.031619	-7.79981	3.7993e-05	0.00300136
XM_015092632.1	0	0.136447	-13.2124	3.84067e-05	0.00301997
XM_012187604.2	0	0.0341928	-10.2987	3.84478e-05	0.00301997
XM_012179375.2	0.992487	0	14.1902	3.94119e-05	0.00307861
XM_012102580.2	0	1.14846	-14.263	3.94234e-05	0.00307861
XM_012184421.2	2.45463	0.0530677	5.51122	3.94799e-05	0.00307861
XM_004012974.3	12.808	0.822374	4.03062	4.05301e-05	0.00313351
XM_015103812.1	0.81047	0	12.2319	4.10825e-05	0.00315849
XM_004020107.3	0.11161	0	10.1737	4.21291e-05	0.00321741
XM_004008022.3	4.36323	77.5679	-3.93108	4.27799e-05	0.00325988
XM_004003966.2	15.0976	1.42247	3.40929	4.2966e-05	0.00327045
XM_004011213.3	29.2276	3.13356	3.29327	4.34479e-05	0.00329478
XM_015100926.1	0.121016	17.751	-7.06476	4.3477e-05	0.00329478
XM_012103792.2	0.00538233	2.97027	-9.01394	4.37494e-05	0.00330938
XM_012101464.2	9.77042	0.018267	9.00557	4.41098e-05	0.00333174
XM_004021899.3	0.010814	1.05127	-6.47665	4.44538e-05	0.00335405
XM_012188618.2	0.0986665	74.4467	-9.47414	4.50827e-05	0.00339406
XM_015095544.1	0.076142	0	12.4962	4.5285e-05	0.00340185
XM_012095695.1	0.991955	4.1e-05	14.5236	4.53388e-05	0.00340219
XM_012185302.1	1.68091	1426.63	-9.8284	4.54339e-05	0.00340561
XM_012177791.2	0.374659	0	11.448	4.63832e-05	0.00346546
XM_004012089.3	0	0.329719	-9.97031	4.72269e-05	0.00352086
XM_012187763.2	0.225786	0	13.8559	4.8212e-05	0.00359041
XM_012175211.2	0	2.41042	-16.2008	4.83166e-05	0.00359432
XM_012189001.2	0	0.778227	-16.2217	4.85472e-05	0.00360758
XM_012101523.2	0.283224	10.5578	-5.2317	5.13762e-05	0.00378919
XM_015104559.1	183.564	22.2094	3.12294	5.15338e-05	0.00379513
XM_012095696.2	0.338054	0	16.545	5.15936e-05	0.00379513
XM_015098999.1	3.95e-05	0.918121	-13.5636	5.16221e-05	0.00379513
XM_015101898.1	0.0006165	1.02356	-10.2509	5.17591e-05	0.00380115
XM_012105414.2	0	0.048257	-8.52839	5.34854e-05	0.00391957
XM_012097091.2	0	0.0151068	-9.8392	5.35775e-05	0.00392215
XM_015097078.1	0.0574685	18.9913	-7.99683	5.37831e-05	0.00392885
XM_015102998.1	1.57778	0.000369333	10.2213	5.39266e-05	0.00393023
XM_012096078.2	46.1413	2.99163	4.02023	5.39527e-05	0.00393023
XM_012104085.2	0.054832	4.1098	-6.17815	5.44972e-05	0.0039642
XM_012101140.2	0	0.650745	-12.1711	5.46339e-05	0.00396868
XM_015101684.1	0.879664	0.00348167	7.96949	5.47366e-05	0.00396904
XM_004016361.2	0	0.848019	-16.0522	5.55107e-05	0.0040125
XM_012189360.2	0	0.0972715	-11.7285	5.57715e-05	0.00402305
XM_015096063.1	0	0.621196	-11.6459	5.58959e-05	0.00402767
XM_004011731.3	10.1438	0.0283912	8.56138	5.64077e-05	0.00405183
XM_012175414.2	6.8219	0.464984	3.99881	5.64761e-05	0.00405252
XM_012180067.2	0	0.347675	-13.7138	5.67037e-05	0.00406461
XM_004015962.3	114.892	15.5114	2.95344	5.68034e-05	0.00406752
XM_004002848.2	0.0167427	0.981423	-5.80774	5.70394e-05	0.00408019
XM_015094876.1	23.4553	3.17232	2.94792	5.71134e-05	0.00408124
XM_015097804.1	0.0516892	0	12.6854	5.76826e-05	0.00411236
XM_015098724.1	6.77236	0.372075	4.24945	5.81446e-05	0.00413776
XM_012099358.2	0	0.385869	-14.5558	5.82409e-05	0.00414033
XM_004012850.3	0.103476	0	11.7738	5.84512e-05	0.00414672
XM_012187906.1	15.3221	1.62791	3.38358	5.8591e-05	0.00415237
XM_012188108.2	0	0.427398	-16.1083	5.89592e-05	0.00417417
XM_015097441.1	0	0.250174	-13.9019	5.93429e-05	0.00419271
XM_015100962.1	0.105589	0	11.7509	5.94958e-05	0.00419921
XM_004022017.3	9.30364	0.925958	3.38671	6.05432e-05	0.0042644
XM_012107663.2	0	0.268898	-11.5516	6.19425e-05	0.00435405
XM_015095003.1	0	0.717033	-15.9608	6.30324e-05	0.00442614
XM_012174901.2	1.76951	0.112896	3.94202	6.32366e-05	0.00443323
XM_012180118.2	0.684438	0	16.1289	6.37536e-05	0.00446062
XM_004011653.3	0.00603167	2.27637	-8.49897	6.4398e-05	0.00448545
XM_012097286.2	0.0690232	7.31181	-6.77653	6.44568e-05	0.00448545
XM_012096608.2	0	0.14946	-13.8527	6.44697e-05	0.00448545
XM_012175578.1	0.234778	4.29043	-4.16192	6.45026e-05	0.00448545
XM_015099575.1	0.15868	1.9911	-3.65953	6.49837e-05	0.00451257
XM_015091618.1	0.176278	6.98111	-5.19951	6.51268e-05	0.00451341
XM_004006898.3	3.28111	0	13.7935	6.55769e-05	0.00453548
XM_015103958.1	0	0.193038	-10.1287	6.56874e-05	0.00453856
XM_015094135.1	0	0.124905	-12.3502	6.6347e-05	0.00457954
XM_004012529.3	0	0.262986	-10.3161	6.65129e-05	0.00458639
XM_012177739.2	0.356165	0	9.86753	6.69075e-05	0.00460899
XM_004017955.2	0	0.209637	-13.8523	6.74131e-05	0.00462741
XM_012173699.2	0.260851	0	11.631	6.79129e-05	0.00465034
XM_012173165.2	0	0.179648	-13.5557	6.8089e-05	0.00465331
XM_012106296.2	0	0.0940238	-12.6451	6.81183e-05	0.00465331
XM_004009012.3	309.237	0.117912	11.503	6.81588e-05	0.00465331
XM_012097435.2	0	0.165822	-12.9171	6.84388e-05	0.00466318
XM_015095543.1	0.0523868	0	11.9529	6.86197e-05	0.00466627
XM_012180304.2	3.33333e-06	0.26658	-13.9164	6.87137e-05	0.00466806
XM_015092623.1	0	1.20974	-15.807	6.90643e-05	0.00468726
XM_012098693.2	1.04303	0	11.6246	6.95887e-05	0.00470892
XM_012107494.2	0.165779	9.35582	-5.74423	6.97455e-05	0.0047149
XM_012096786.1	0.420727	0	13.6531	6.99878e-05	0.00472661
XM_004015548.2	2.37068	0.173398	3.81982	7.00559e-05	0.00472661
XM_012104558.2	6.57937	0.50657	3.70526	7.01407e-05	0.00472771
XM_012105318.2	0	0.0980258	-12.2049	7.1192e-05	0.00477985
XM_015095013.1	2.19769	0.115005	4.30677	7.2128e-05	0.00482858
XM_015103453.1	0	0.157223	-13.6088	7.23214e-05	0.00483683
XM_012177021.1	0	0.0971808	-13.4516	7.51856e-05	0.00499999
XM_015094465.1	3.41139	0.005086	9.45412	7.73367e-05	0.00512744
XM_012184689.2	0	0.176482	-10.033	7.74411e-05	0.00512943
XM_004016861.3	0	0.114436	-13.4544	7.77223e-05	0.00514311
XM_004016039.3	0.262856	148.885	-9.14463	7.86622e-05	0.00520031
XM_012181887.1	3.41729	58.7592	-4.13898	7.92518e-05	0.00523426
XM_012185101.2	54.0395	7.32345	2.98787	7.96093e-05	0.00524782
XM_012107350.1	0	0.139015	-11.3025	7.97678e-05	0.00525082
XM_012176326.2	8.8809	63.2408	-2.76147	8.00264e-05	0.00525082
XM_012184698.2	143.871	16.4744	3.23302	8.0036e-05	0.00525082
XM_012141762.2	0	0.645168	-15.6338	8.15226e-05	0.00533818
XM_012135657.1	31.8584	351.416	-3.42168	8.23494e-05	0.00538163
XM_004009904.2	0	0.0883698	-9.46058	8.28363e-05	0.00540366
XM_012174309.1	0.003304	0.443199	-6.92029	8.30002e-05	0.00540687
XM_004006132.3	0.253249	0	13.5233	8.31211e-05	0.00540687
XM_012173394.2	0	0.479847	-13.4611	8.59195e-05	0.00556257
XM_015094937.1	0.177551	0	11.397	8.70282e-05	0.00560921
XM_012122615.2	0.323382	0	15.7297	8.7046e-05	0.00560921
XM_004017371.3	0.235886	0	13.7904	8.71748e-05	0.00561227
XM_004010648.3	32.6474	313.926	-3.28216	8.73563e-05	0.00561349
XM_015103704.1	0.0155452	0	11.4262	8.78715e-05	0.00563605
XM_015101482.1	17.7733	0.827607	4.5175	8.90234e-05	0.00570462
XM_012178032.1	0.00251167	1.0446	-7.58106	8.92928e-05	0.00571656
XM_012176553.1	0	0.0343342	-12.1264	8.99416e-05	0.00575092
XM_004001935.3	0.111416	2.98523	-4.7282	9.00798e-05	0.00575092
XM_004005326.3	3.68425	0.0231815	7.42961	9.01806e-05	0.00575202
XM_012187705.2	0	0.8645	-13.5263	9.04489e-05	0.00575927
XM_012189348.2	8.45895	0	15.6774	9.04614e-05	0.00575927
XM_012177174.2	0	0.145165	-13.3204	9.10635e-05	0.0057869
XM_012129637.1	0.265085	99.374	-8.15643	9.18589e-05	0.00583207
XM_012182848.2	0.539603	0	16.5856	9.22743e-05	0.005843
XM_012183792.2	1.2404	0.00165633	9.62418	9.22856e-05	0.005843
XM_015102351.1	0.451753	0	13.8268	9.24021e-05	0.005845
XM_012184324.2	190.658	2681.14	-3.77654	9.2676e-05	0.00585545
XM_015092020.1	0	0.301302	-13.2735	9.27373e-05	0.00585545
XM_012188859.2	1.64176	0.00720617	7.49511	9.34221e-05	0.00589329
XM_012162335.1	2.42609	33.521	-3.84871	9.43946e-05	0.00594919
XM_015094812.1	0.0950912	0	13.5413	9.45039e-05	0.00595064
XM_012106504.2	0.0748647	5.64883	-6.17232	9.51803e-05	0.00598726
XM_004017055.3	0.173731	0	11.488	9.64483e-05	0.00605646
XM_012179097.2	5.05718	46.5822	-3.1504	9.68852e-05	0.00607836
XM_015100929.1	0.00196883	2.28243	-9.6166	9.70728e-05	0.00608028
XM_012174113.2	0	0.205503	-13.4057	9.92714e-05	0.00619983
XM_015102751.1	0	0.10498	-13.9793	9.9471e-05	0.00620667
XM_004015248.3	1.06885	0	13.5303	9.98442e-05	0.00622432
XM_004005753.3	7.50476	0.202152	5.27545	9.99987e-05	0.00622831
XM_015097859.1	0	0.0169998	-11.8061	0.000100285	0.00624051
XM_012101203.2	0	0.139695	-11.4897	0.000100464	0.00624407
XM_004020178.3	0	0.214467	-15.3833	0.000101532	0.00629535
XM_012100737.2	0.416534	0	11.5818	0.00010214	0.00632735
XM_012115640.1	7.01407	0.0590258	6.84189	0.000103679	0.00640344
XM_015099163.1	13.6422	0.718901	4.31242	0.00010374	0.00640344
XM_015092912.1	0.0491978	0	14.129	0.000104667	0.00645484
XM_012173627.2	0	0.108765	-13.1508	0.000104903	0.00646361
XM_012190175.2	0.819918	0	12.0609	0.000105647	0.00650368
XM_012176291.2	0	0.268499	-15.6715	0.000106658	0.00656004
XM_012125963.2	0.000475	0.622123	-10.167	0.000107036	0.00657152
XM_004004717.2	0	0.315607	-15.3488	0.000107383	0.00658115
XM_012161746.2	0	0.414864	-11.2184	0.000108146	0.00662197
XM_004002409.3	119.61	14.3587	3.2049	0.00010937	0.00668506
XM_004007046.3	0.0143612	2.75942	-7.57085	0.000110354	0.00673924
XM_012178758.2	0.0695222	0	12.0255	0.000111381	0.00677839
XM_004017439.3	0	0.365353	-13.1172	0.000111389	0.00677839
XM_004007945.3	2.86458	0.00137783	11.1808	0.000111812	0.00679811
XM_004018435.3	0	0.178915	-9.19892	0.000112992	0.00686381
XM_015093110.1	20	0.960436	4.53154	0.000113232	0.00687234
XM_015095038.1	0.970359	0	9.60528	0.000113481	0.00688137
XM_012186283.2	0.991846	0.00134483	9.26705	0.000113955	0.00689797
XM_012181536.2	0	1.28079	-15.2953	0.000115142	0.00694745
XM_012098466.1	11.7613	0.059995	7.52664	0.000115176	0.00694745
XM_015102373.1	0	0.742149	-14.6113	0.000116818	0.00703283
XM_012183791.2	17.3818	1.38314	3.69144	0.000116897	0.00703283
XM_004019556.3	51.4477	0.498696	6.76708	0.000118945	0.00713111
XM_004020502.2	0	0.0516767	-13.5548	0.000119872	0.0071742
XM_012124152.1	0.188493	0.000999333	7.45725	0.00012072	0.00721244
XM_012178552.2	12.7238	1.17834	3.55605	0.000121572	0.00725705
XM_015094439.1	0	1.05021	-15.5122	0.000121719	0.00725951
XM_012105444.2	0.024564	1.05809	-5.42187	0.000123893	0.00737641
XM_015100075.1	1.09819	0.007518	7.00159	0.000125248	0.00742646
XM_015096777.1	1.09577	13.0591	-3.53489	0.000125273	0.00742646
XM_012099719.2	0	0.29843	-15.167	0.000125818	0.00745239
XM_012181008.2	8.52009	0.0682413	7.05986	0.000127592	0.00754445
XM_012181864.2	0	0.0787807	-13.8898	0.000128671	0.00759987
NM_001131031.1	26.7493	215.651	-2.98928	0.00013034	0.00768059
XM_012096750.2	0.0302083	2.18784	-6.08547	0.000131432	0.00771855
XM_015097245.1	0	0.467201	-15.1035	0.000132572	0.0077656
XM_012181266.2	0	0.388245	-10.7861	0.000132998	0.00777735
XM_012169025.2	0	0.0771203	-15.1257	0.000133208	0.00778298
XM_004023545.3	1.43791	0.00694817	7.13743	0.00013345	0.00779055
XM_004022116.3	0	0.444304	-10.7401	0.000134755	0.00786009
NM_001306124.1	44.4038	4.5553	3.39273	0.000135244	0.00788189
XM_004015493.3	1.47507	0.0565577	4.79087	0.000135595	0.00789568
XM_012106209.2	0.0138717	1.73835	-7.03725	0.000135791	0.0079004
XM_012180307.2	0	0.284623	-15.3683	0.000137052	0.00794693
XM_004011767.2	4.26667	0.33027	3.74391	0.000137726	0.007968
NM_001306107.1	13.4493	1.36147	3.44252	0.000138368	0.00799634
XM_012159955.2	0	0.0903892	-9.18072	0.000139371	0.00803406
XM_015102031.1	50.7859	1.04569	5.63425	0.000140604	0.00809162
XM_012174567.2	0	0.470434	-15.0465	0.000141358	0.00811089
XM_012098365.2	0	0.22539	-13.9281	0.000141425	0.00811089
XM_004022403.3	0	0.248884	-15.1862	0.00014172	0.00811512
XM_004003415.2	49.0336	6.7154	2.9304	0.000141839	0.00811522
XM_012180091.2	1.79561	15.952	-3.18089	0.000143393	0.00818376
XM_012182866.2	0.780059	0	14.8607	0.000144627	0.00823371
XM_015097265.1	5.51058	0.608386	3.20416	0.00014566	0.00828566
XM_015094493.1	0.190437	0	13.2702	0.000146838	0.00834576
XM_012182413.2	0.000262833	2.66372	-13.2335	0.000147465	0.0083745
XM_012107510.2	0	0.144395	-12.8224	0.000147618	0.00837628
XM_012105546.2	21.4122	2.4028	3.23889	0.000148899	0.00843508
XM_012098946.1	0	0.205658	-13.4717	0.000149487	0.00846143
XM_012140869.2	6.68114	42.0784	-2.5784	0.000151683	0.00855763
XM_015093053.1	0	0.276032	-12.791	0.000152765	0.00861162
XM_012102562.1	0.000512	1.4736	-9.8892	0.000154492	0.00870183
XM_012162328.2	0.615001	144.405	-7.88584	0.000155711	0.00874904
XM_012105714.2	0.197642	0.00231183	6.01618	0.000157317	0.00882043
XM_004012536.3	0	2.32939	-12.8049	0.000158298	0.00885448
XM_012106444.2	2.53792	0.156893	4.18729	0.000158359	0.00885448
XM_015104071.1	1.3874	0	12.9348	0.000159604	0.00889876
XM_012179516.2	0	0.437537	-10.8044	0.000159638	0.00889876
XM_004002694.3	1.30757	0.0422883	4.9579	0.000159797	0.00889876
XM_012177752.2	5.66098	0.0607315	6.44452	0.000161827	0.00899725
XM_012174281.2	0	1.68215	-14.9	0.000162121	0.00900135
XM_015093229.1	0	0.0344012	-11.7519	0.000162162	0.00900135
XM_015102336.1	0.103732	0	12.951	0.00016261	0.00900854
XM_015093606.1	5.79851	0.00306033	10.513	0.000162684	0.00900854
XM_004009981.3	420.641	63.8539	2.80873	0.000163505	0.00904672
TCONS_00256340	2.48148	0.0763707	5.1137	0.000163894	0.00906098
XM_012182099.2	0.278711	0	15.0685	0.000165153	0.00910864
XM_012189897.1	1.98064	0	13.1478	0.00016645	0.00915144
XM_012103383.2	0	0.280865	-14.865	0.00016646	0.00915144
XM_015092978.1	0	0.976914	-15.2567	0.000166657	0.00915499
XM_012175248.1	0.373621	9.14868	-4.40316	0.000167929	0.0092175
XM_012100895.2	0.282927	0	13.1302	0.000169272	0.00928383
XM_012184621.2	0	0.0427518	-9.01305	0.000169424	0.00928475
XM_012103030.2	0	0.338628	-12.6912	0.000169997	0.00930134
XM_015099344.1	0.634368	0	15.1576	0.000170234	0.00930696
XM_012104189.2	0.324661	0	11.0868	0.000170843	0.00933281
XM_012179905.2	15.597	1.59555	3.38951	0.000171494	0.00936094
XM_012188463.2	0.13164	3.00741	-4.68281	0.000173354	0.00944041
XM_012135683.2	12.6218	0.128348	6.83077	0.000173361	0.00944041
XM_004019011.2	685.786	27.627	4.55266	0.000174803	0.00951143
XM_012178287.2	0.617584	0	15.0256	0.000175262	0.00952138
XM_012105906.2	0	0.137719	-14.8623	0.000175446	0.00952388
XM_004012792.3	4.87041	0.014117	8.53457	0.000175813	0.00953629
XM_004021000.2	0.272101	5.73064	-4.36458	0.000177165	0.00959449
XM_012157964.1	0.161412	0	15.0079	0.000177346	0.00959675
XM_012188616.2	1.93618	0.0327505	5.8995	0.000178848	0.00966282
XM_012172314.2	0	0.203489	-15.3057	0.00017953	0.00968571
XM_015096175.1	7.88422	0.78088	3.23916	0.000179552	0.00968571
XM_015100731.1	0.0601715	0	13.209	0.000180522	0.00972405
XM_012173633.2	0.137756	0	13.4565	0.000180557	0.00972405
XM_012100716.1	0	0.0777992	-12.7482	0.000180694	0.00972405
XM_015099896.1	0.213464	0.0009585	7.63996	0.000181392	0.00973969
XM_004015030.3	5.80689	0.654022	3.28087	0.000181401	0.00973969
XM_004006560.3	32.7388	4.41995	2.93705	0.000181799	0.00974926
XM_012180288.2	64.7757	6.80276	3.39738	0.000181863	0.00974926
XM_004017275.3	1.66667e-07	0.288183	-12.1021	0.000182288	0.00976446
XM_012189316.2	0	0.629144	-14.7971	0.000183633	0.00982884
XM_004014322.3	26.7505	0.28802	6.38399	0.000184281	0.00985589
XM_012189692.2	0	0.275204	-9.54124	0.000185555	0.00988564
XM_004002859.3	0.002568	0.694459	-7.90912	0.000188509	0.0100198
XM_015095209.1	0	0.106028	-14.8133	0.000191365	0.0101325
XM_004020039.3	0	0.474154	-14.8214	0.000191687	0.0101377
XM_012176247.2	0	27.1058	-18.9191	0.000191757	0.0101377
XM_004008129.3	0.183202	0	10.1044	0.000193382	0.0102119
XM_015092831.1	98.4347	15.4985	2.78694	0.000193457	0.0102119
XM_012185515.2	0	0.716209	-12.6899	0.000193679	0.010212
XM_012183170.2	0	0.210984	-9.97987	0.000193756	0.010212
XM_012188118.1	0.00285633	0.690059	-7.67989	0.000196144	0.0102985
XM_015096868.1	118.299	16.9963	2.86517	0.000196635	0.0103164
XM_012104622.2	0.0923518	9.32221	-6.66442	0.000197219	0.0103277
XM_004015192.3	0.000296	0.745813	-10.884	0.000197232	0.0103277
XM_012176243.2	12.6453	258.017	-4.27105	0.000197301	0.0103277
XM_012184358.2	0.00304183	0.277994	-6.56183	0.000198094	0.0103535
XM_015093109.1	6.29064	0.177155	5.20747	0.000198853	0.0103853
XM_012189792.2	0.300252	4.35769	-3.87219	0.000199525	0.0104046
XM_015099097.1	34.0676	5.29485	2.78941	0.000199814	0.0104104
XM_012104154.2	1.99434	0.144543	3.79084	0.000199938	0.0104104
XM_012180463.1	0	0.119855	-10.6833	0.00020143	0.0104576
XM_004009646.2	0.443432	0	13.5952	0.000201453	0.0104576
XM_012101885.2	0.00645517	0.751637	-6.79972	0.000202279	0.0104847
XM_012096108.2	0.0344725	0.476031	-3.81572	0.000202525	0.0104879
XM_012184013.2	0	0.041879	-12.5257	0.000202645	0.0104879
XM_012183788.2	0.481384	0	13.2619	0.000203946	0.0105473
XM_012103902.2	0.00139117	0.54922	-8.47581	0.000206531	0.010673
XM_012101930.2	5.31718	0.114318	5.64252	0.000207001	0.0106893
XM_015100739.1	0.117946	0	14.7915	0.00020943	0.0107985
XM_012174395.2	2.14399	0	14.8425	0.00021056	0.0108332
XM_012096208.2	2.68679	0.124091	4.59276	0.000214156	0.0109928
XM_012188446.1	0	0.0273268	-10.6761	0.00021529	0.0110428
XM_012103897.1	0.00118983	0.427004	-8.00912	0.000216118	0.0110534
XM_012101861.2	0	0.383491	-12.4523	0.000216665	0.0110639
XM_012174517.2	0	0.071698	-10.7362	0.000217973	0.0111142
XM_012099408.2	0	0.465415	-12.4331	0.000219875	0.0111863
XM_004003057.3	3.8398	36.1333	-3.09864	0.000222304	0.0112684
XM_004016348.3	0	0.0775287	-13.0366	0.000222896	0.0112817
XM_004018411.3	178.881	24.5095	2.93289	0.000223746	0.0113164
XM_015096542.1	122.128	18.2362	2.85417	0.000225748	0.0114009
XM_004011302.3	7.04821	0.996188	2.93035	0.000226399	0.0114171
XM_012183489.1	0.132248	0	11.5071	0.000227395	0.0114553
XM_015097154.1	0.193656	0	14.7416	0.00022749	0.0114553
XM_015103895.1	0	0.0336427	-12.4298	0.000227705	0.0114578
XM_012175754.2	0	0.0136378	-8.54226	0.000228371	0.0114829
XM_004016880.3	0.0519217	0	10.5404	0.000230151	0.0115471
XM_012177755.1	2.83682	18.9268	-2.69535	0.000232168	0.0116215
XM_004005396.3	0	0.15938	-7.7752	0.000234071	0.0117012
XM_012144513.2	0	0.105963	-12.4158	0.00023601	0.0117895
XM_004017901.3	3.00004	0.415231	2.95241	0.000236978	0.0118293
XM_004008456.3	1.32679	0.001368	9.65072	0.000238378	0.0118734
XM_004020199.3	84.5635	13.0074	2.80603	0.000241489	0.0119977
XM_012166437.2	0.422582	0.00162183	7.48347	0.000241727	0.0119977
XM_015104723.1	5.58038	0.456023	3.68364	0.000241825	0.0119977
XM_004006237.3	30.2861	2.91474	3.50885	0.000241919	0.0119977
XM_004008685.2	148.99	24.8572	2.6587	0.000243327	0.0120502
XM_015102702.1	0.000930667	0.701707	-9.11702	0.000245051	0.0121268
XM_012122824.2	7.88533	0.954571	3.18386	0.000246534	0.0121915
XM_012181459.1	0.0830723	0	12.5627	0.000248691	0.0122805
XM_012097557.2	0.117537	0	12.6479	0.000249081	0.012291
XM_004014256.3	0	0.0484932	-12.8123	0.000249263	0.0122911
XM_004017484.2	34.0889	5.08904	2.82827	0.000249764	0.0122983
XM_004009100.3	0	0.238046	-14.5236	0.000251316	0.012357
XM_012100248.2	0	0.298621	-12.2565	0.000258179	0.0126454
XM_015097827.1	0	0.477017	-13.8693	0.000258186	0.0126454
XM_012096019.2	0	0.306972	-14.4105	0.000258282	0.0126454
XM_015101315.1	0	10.0646	-17.7647	0.000261796	0.0127912
XM_015102614.1	0.145573	0	8.59189	0.000261817	0.0127912
XM_012105090.1	0	0.131385	-12.6294	0.000263206	0.0128499
XM_012096580.2	0	0.0916573	-13.0673	0.000264182	0.0128793
XM_015094744.1	5.77872	0.234625	4.70178	0.000265643	0.0129322
XM_015098561.1	0	16.6268	-17.7128	0.00026624	0.0129388
XM_004022843.3	2.03582	0.0058	8.22673	0.000266341	0.0129388
NM_001163603.1	102.554	688.001	-2.79813	0.000267267	0.0129746
XM_004006233.3	0.201261	0.000321167	8.87301	0.000267975	0.0129998
XM_015098761.1	1.00545	0	15.0541	0.000269529	0.0130433
XM_015093088.1	0.00173767	0.543316	-7.9695	0.000270729	0.0130774
NM_001009189.1	162.616	19.4768	3.11526	0.000270903	0.0130774
XM_012175609.2	0	0.201691	-10.7561	0.000272754	0.0131391
XM_012104427.2	2.39822	0	14.5847	0.000274329	0.0132058
XM_012184361.1	0	1.20593	-14.3469	0.000276498	0.0132916
XM_015097934.1	0.0001165	0.104136	-9.40378	0.000276728	0.0132926
XM_015103483.1	239.885	25.9958	3.24096	0.000276904	0.0132926
XM_012185440.1	0	0.186704	-12.6538	0.00027748	0.0133109
XM_004006918.3	100.925	15.4236	2.76036	0.0002785	0.0133413
XM_004006455.3	1.98857	12.447	-2.59458	0.00027892	0.0133521
XM_012143683.2	4.57197	0.193039	4.60664	0.000280323	0.01341
XM_004020886.3	0	0.394056	-10.0822	0.000282392	0.0134902
XM_012142907.2	0	0.0159407	-8.41362	0.000283263	0.0135224
XM_004020815.2	0	0.347387	-12.6778	0.000283787	0.013538
XM_012177164.2	3.64332	0.186561	4.39539	0.000285054	0.0135891
XM_012095039.2	0	0.998253	-12.1565	0.000285358	0.0135942
XM_004005699.3	0.575209	0	12.4723	0.000286448	0.0136367
XM_012094771.2	9.18964	0.459842	4.32031	0.000288859	0.0136941
XM_012139299.2	0	0.190672	-14.6032	0.000291272	0.0137593
XM_015096299.1	0.195124	4.67803	-4.48824	0.000291284	0.0137593
XM_012103868.2	0.00121033	0.584803	-8.84923	0.00029142	0.0137593
XM_012184985.2	27.6167	0.104169	8.02169	0.000292119	0.0137734
XM_004005072.3	17.7067	2.13593	3.22696	0.000292751	0.0137848
XM_015091897.1	0	0.099008	-12.1599	0.000292761	0.0137848
XM_012107026.2	0	0.0840655	-14.3044	0.000292972	0.0137853
XM_012128768.1	0.176373	0	14.4681	0.00029381	0.0138153
XM_012186386.2	0.246025	0	10.8483	0.000294085	0.0138188
XM_004019395.3	65.9039	11.8061	2.55258	0.000296185	0.0138862
XM_012187687.2	0	0.108932	-10.066	0.000296326	0.0138862
XM_004002530.3	15.5178	109.782	-2.80979	0.000297309	0.0139228
XM_004016051.3	50.2954	332.564	-2.62627	0.000299065	0.0139657
XM_015093724.1	0.381371	0	12.3014	0.000299789	0.0139819
XM_004016513.3	15.3009	0.0138265	10.0832	0.000302181	0.0140562
XM_012179733.2	0.00575383	1.06637	-7.63595	0.000302218	0.0140562
XM_004003154.3	1.60788	0	17.9235	0.000302939	0.0140716
XM_012179041.2	1.66935	0.134177	3.61136	0.000303616	0.0140856
XM_015095330.1	1.06812	0.0665655	4.15577	0.000303846	0.0140856
XM_012102571.2	0.0676747	1.46453	-4.44442	0.000303852	0.0140856
XM_015096066.1	0	0.220982	-10.2038	0.000306623	0.0142045
XM_004017906.3	134.901	23.5966	2.61407	0.000307813	0.01425
XM_012095510.2	0.436621	0	11.5709	0.000310326	0.0143471
XM_015102509.1	0.577745	0	12.2336	0.000313084	0.0144472
XM_004002224.2	0.587086	5.4313	-3.1379	0.000313122	0.0144472
XM_012102528.2	0.171378	0	12.2481	0.000313877	0.0144567
XM_004019005.3	47.3388	6.26318	3.07521	0.000314181	0.0144574
XM_015098356.1	0	0.128303	-8.30633	0.000314409	0.0144582
XM_012186462.2	0.136601	0	10.1293	0.000315725	0.0144897
XM_015093033.1	0	0.109932	-12.2972	0.0003184	0.014593
XM_012175737.2	1.08227	0.0475962	4.57192	0.000320086	0.0146606
XM_015104111.1	0.220256	9.42204	-5.34847	0.000322087	0.0147424
XM_012094713.1	0.000990833	0.779599	-9.41873	0.000324952	0.0148439
XM_012105818.2	0	0.209209	-12.1271	0.000326976	0.0149265
XM_004006537.3	0.000723333	1.00263	-9.23196	0.000328561	0.0149889
XM_015095545.1	0.0609233	0	12.1471	0.000330876	0.0150547
XM_012104166.2	3.40738	40.963	-3.48365	0.0003336	0.0151351
NM_001048231.1	2.38549	37.1281	-3.8948	0.000333705	0.0151351
XM_012180884.2	0.0618408	0	12.1432	0.000337279	0.0152553
XM_015094037.1	0	0.0466793	-14.1318	0.000338692	0.0153066
XM_012107027.2	0	0.079853	-14.212	0.000339279	0.0153156
XM_012177218.2	0.04342	2.77847	-6.00627	0.000340648	0.0153472
XM_012173707.2	12.4881	1.54964	3.07816	0.00034299	0.0154224
XM_012176466.2	0	0.656262	-14.3978	0.000343869	0.0154519
XM_012181616.1	0	0.114519	-12.2057	0.000344594	0.0154744
XM_015095231.1	14.2219	1.57466	3.21828	0.00034789	0.015602
XM_004009878.3	2.87185	32.0418	-3.49101	0.000348276	0.0156092
XM_015094740.1	0	0.147957	-12.0999	0.000349088	0.0156151
XM_015101142.1	0.0245743	0	10.7793	0.000351291	0.0156768
XM_012188223.2	4.14888	0	17.4329	0.000351606	0.0156768
XM_012180076.1	0.011811	4.55873	-8.44343	0.000355903	0.0158479
XM_015100268.1	3.01364	0.373489	3.0962	0.000357946	0.0159183
XM_015093578.1	0.283962	2.19857	-2.9439	0.000360158	0.0160007
XM_015095221.1	0.0275335	0	10.6123	0.000360574	0.0160042
XM_015095461.1	0.175521	0	12.2457	0.000363614	0.0161047
XM_015095056.1	0	0.0481113	-10.1848	0.000363629	0.0161047
XM_015103793.1	0	0.829488	-16.7767	0.000363774	0.0161047
XM_015100844.1	0.238876	0	8.07928	0.000365157	0.0161356
XM_012095761.2	0	0.189043	-12.2017	0.000366518	0.0161846
XM_012101177.2	1.46805	0	17.089	0.000369385	0.0162915
XM_012188625.2	28.8378	2.63664	3.5932	0.000369861	0.0162915
XM_012095466.2	0.00428833	1.50543	-8.22061	0.000369878	0.0162915
XM_015096005.1	0.697832	10.9058	-3.93247	0.000369885	0.0162915
XM_004015579.3	1.44309	0	12.1605	0.000370396	0.0162952
XM_012182189.2	0.0937133	0	12.3743	0.000371511	0.0163208
XM_012103838.2	0	0.902439	-11.8694	0.000371734	0.0163208
XM_015101121.1	0	0.056675	-12.2474	0.000373075	0.0163588
XM_004022286.3	0.709007	0	17.1055	0.000376078	0.01648
XM_004020358.3	0.300198	2.21933	-2.85226	0.00037729	0.0165121
XM_012095670.1	0	102.254	-16.6685	0.000378234	0.0165248
XM_012095950.1	156.234	13.049	3.67034	0.000378617	0.0165282
XM_012095072.2	0	0.222921	-10.3815	0.000379229	0.0165339
XM_004017956.2	0	0.408849	-14.6976	0.000381454	0.0165943
XM_012106950.2	0.180019	0	14.153	0.000381579	0.0165943
XM_012179372.2	5.03816	0.00392367	10.3311	0.000386385	0.0167294
XM_015096860.1	0.842212	0.00202633	8.25779	0.000386991	0.0167452
XM_015104327.1	0.99414	0.00990783	6.69511	0.000387537	0.0167582
XM_004002361.2	0	0.295932	-11.8306	0.000391072	0.0168899
XM_012162309.2	0.0252062	3.03292	-7.01261	0.000393113	0.0169568
XM_015103415.1	0.175583	6.84053	-5.16146	0.000393998	0.0169737
XM_004002025.2	0	0.146448	-12.1289	0.000398598	0.0171397
XM_015096215.1	1.91252	0.137883	3.83523	0.000402265	0.0172519
XM_015097309.1	0	0.582227	-14.2279	0.000402493	0.0172519
XM_012096320.1	0	0.0330032	-11.1869	0.00040266	0.0172519
XM_012185237.2	0.494962	0	16.8427	0.000406011	0.0173717
XM_015104820.1	0.837321	0	14.1178	0.000407116	0.0174082
XM_015097142.1	0.0656838	0	12.0136	0.000409426	0.0174786
XM_015094596.1	0	0.105181	-11.7581	0.000410289	0.0175004
XM_015092665.1	0	0.184415	-11.7813	0.000412514	0.0175837
XM_012099466.2	0.000517	0.0800448	-7.11672	0.000412753	0.0175837
XM_015092663.1	0.014123	2.22038	-7.18231	0.000413121	0.0175883
XM_012187299.1	0.0217155	0.73705	-5.30151	0.000413375	0.0175883
XM_004016018.2	0	0.222409	-12.8083	0.000414772	0.0176207
XM_012175081.2	0	0.0699802	-10.0067	0.000414942	0.0176207
XM_015098725.1	0.784185	0	14.0546	0.000415373	0.0176207
XM_004008584.3	0.312399	38.5297	-6.72964	0.000416947	0.017675
XM_004007965.2	17.0051	1.58902	3.59855	0.000419804	0.017775
XM_012097389.2	0	0.536295	-16.3914	0.000419822	0.017775
XM_012190140.2	0.907039	0	14.0264	0.000420259	0.0177825
XM_015091895.1	52.197	7.6234	2.90337	0.000421792	0.0178298
XM_012108420.2	56.7727	402.86	-2.8066	0.000421981	0.0178298
XM_015103506.1	0.997226	0	11.9149	0.000424647	0.0179055
XM_012105728.2	0	0.718085	-10.0247	0.000425321	0.0179055
XM_012187710.1	0.350674	0	14.3898	0.000425554	0.0179055
XM_012135846.2	0	0.540806	-13.8556	0.00042582	0.0179055
XM_012180096.1	475.818	71.3169	2.88985	0.000426776	0.0179152
XM_012107542.2	0	0.101716	-11.7204	0.00042759	0.0179276
XM_012107041.2	0.214042	0	12.3618	0.000430273	0.0180285
XM_012186299.2	0	0.0493285	-12.0216	0.000431355	0.0180415
XM_015097713.1	0	0.625019	-13.8332	0.000432991	0.0180989
XM_015102615.1	98.7217	14.7126	2.78054	0.000435641	0.0181629
XM_012103176.2	0.485085	0.003267	7.31155	0.00043864	0.0182575
XM_012103378.2	0.00556667	1.30441	-7.81768	0.000445083	0.0184921
XM_004005910.3	15.8431	103.531	-2.64104	0.000450038	0.0186309
XM_015093345.1	8.44373	0	16.6934	0.000451709	0.0186461
XM_012178011.1	11.5865	0.793754	3.91374	0.000452953	0.0186839
XM_015093679.1	7.30837	0	14.0628	0.000455044	0.0187589
XM_012096107.2	0.0017965	0.253323	-6.90874	0.000457068	0.0188004
XM_012154933.2	0.126222	0	9.89947	0.000457414	0.0188004
XM_004019472.3	0.9352	0	13.9918	0.000458941	0.0188519
XM_012099424.1	0.586906	0	16.4534	0.00046284	0.0189424
NM_001308584.1	1.60634	0.202429	3.00837	0.000462933	0.0189424
XM_015094360.1	0	0.319845	-11.6116	0.000463068	0.0189424
XM_004009641.3	0.877832	0.0116838	6.23043	0.00046728	0.0190687
XM_004015423.3	5.19189	0.27783	4.35416	0.000467542	0.0190687
XM_012184853.2	0.269217	0	13.8942	0.00047416	0.0192702
XM_012182483.2	0.030884	7.71626	-7.8558	0.000475834	0.0193268
XM_012136501.2	0.174189	0	13.9379	0.00047678	0.0193532
XM_012187155.2	0	0.127711	-13.7204	0.000477046	0.0193532
XM_012184227.2	0.522312	3.15298	-2.55492	0.000482099	0.0195237
XM_004009656.3	0.262235	2.89982	-3.42596	0.000488389	0.0197321
XM_015100144.1	3.66868	0.563337	2.72588	0.00048923	0.0197354
XM_015104667.1	0.212204	0	16.3048	0.000489243	0.0197354
XM_012179620.2	0.0362742	1.23938	-5.02227	0.000489619	0.0197354
XM_004022153.2	0.0232887	0	7.96749	0.000490005	0.0197354
XM_004011759.3	1.52162	10.7546	-2.77753	0.000491357	0.0197566
XM_015105282.1	5.75161	0.0877735	6.19495	0.000491803	0.0197566
XM_012177649.2	0	0.414873	-9.54404	0.000495353	0.0198851
XM_004020924.2	5.79517	0.199097	4.84736	0.000497153	0.0199341
XM_015103764.1	0	0.304418	-11.7583	0.00049943	0.0200022
XM_012179035.2	0	0.092744	-13.8532	0.000499832	0.0200066
XM_012103891.1	58.1531	10.4594	2.60082	0.000503297	0.020122
XM_004004093.3	16.2672	97.982	-2.52629	0.000505711	0.0201936
XM_015097692.1	0.000704167	0.391229	-8.84607	0.000510598	0.0203177
XM_012188303.2	0	0.116274	-12.2511	0.000510848	0.0203177
XM_012099329.2	0	0.0650412	-12.2042	0.000512255	0.0203465
XM_004014154.3	0.0570847	1.35763	-4.47054	0.00051245	0.0203465
XM_012107651.2	0	0.307104	-13.6605	0.000512753	0.0203465
XM_004006081.2	30.908	184.906	-2.50096	0.000514088	0.0203877
XM_012187861.2	0.000365	0.758965	-10.8338	0.000517054	0.0204525
XM_012103031.2	0	0.145233	-11.4868	0.000521204	0.020587
XM_015091960.1	8.5352	82.1999	-3.15725	0.000525766	0.0207196
XM_015091967.1	0	0.201282	-11.4775	0.000529172	0.02083
XM_012098875.1	0.689072	0.003252	7.55741	0.00053019	0.0208582
XM_012179457.2	0	0.145119	-13.6512	0.000531771	0.0209084
XM_012177029.2	0.0103138	1.33295	-7.07709	0.000533233	0.020942
XM_015093147.1	2.5389	39.3893	-3.9148	0.00053459	0.0209647
XM_012189859.2	0.449669	0	13.8195	0.000535003	0.0209647
XM_015093371.1	0	0.414115	-11.456	0.000535028	0.0209647
XM_012121058.2	0	0.27023	-13.9218	0.00054397	0.0212426
XM_012131849.1	1.04092	0	13.9362	0.000546761	0.0213153
XM_004020176.3	4.46667e-05	0.088991	-10.7407	0.000547811	0.0213442
XM_012174814.2	0.093529	0	6.84217	0.000550194	0.0214186
XM_015103205.1	0.0682325	1.74017	-4.45333	0.000550454	0.0214186
XM_012128399.2	1.84035	0.0539743	5.14858	0.000550653	0.0214186
XM_012101168.2	0.567886	0	16.1114	0.000552735	0.0214874
XM_012158024.2	0.486847	0.046989	3.39002	0.000554545	0.0215456
XM_012187707.2	0.0288893	0	11.6571	0.000556004	0.021578
XM_015094136.1	0	0.0410905	-10.7057	0.000557802	0.0216356
XM_015098945.1	1.682	0	13.8825	0.000561175	0.0217256
XM_012175264.1	0	0.279576	-13.9594	0.000561384	0.0217256
XM_012182631.2	0.289135	0	13.7948	0.000563495	0.021795
XM_015095735.1	0	0.910455	-11.3935	0.000571795	0.0220665
XM_004016062.3	5.70209	34.6238	-2.57614	0.000574951	0.0221759
XM_004015431.3	2.08741	0.0309912	6.08845	0.000580023	0.0223052
XM_004002675.3	0.204513	0	11.5554	0.000580443	0.0223052
XM_012099782.2	0.0393112	0.697916	-4.05608	0.00058057	0.0223052
XM_015104224.1	0.00819233	0.673017	-6.36885	0.000583457	0.0224036
XM_004005866.3	81.5273	13.2354	2.76225	0.000586313	0.0224882
XM_012180699.1	0.769072	0	14.4116	0.000587952	0.0225134
XM_015099217.1	0	2.74481	-13.4728	0.000588027	0.0225134
XM_012131679.2	2.97517	0.25612	3.59254	0.000588411	0.0225134
XM_012098769.1	0	0.331207	-13.4829	0.000588606	0.0225134
XM_015093100.1	0	0.719625	-13.4931	0.000590469	0.0225346
XM_012174367.2	0	0.223929	-9.54802	0.000592051	0.0225825
XM_015093600.1	0.00710383	0.967059	-7.31152	0.000598342	0.022772
XM_015103893.1	1.30679	9.39535	-2.84629	0.000598985	0.0227839
XM_004005102.3	27.5807	4.85845	2.63285	0.00060115	0.0228537
XM_012095978.2	0	0.129564	-7.60623	0.000601795	0.0228656
XM_015104051.1	0.187155	0	10.8902	0.00060388	0.0229321
XM_012176327.2	1.85914	12.6135	-2.66102	0.000606638	0.0229862
XM_012099596.2	0	0.484974	-15.7727	0.00060743	0.0230035
XM_015103401.1	0.394424	0	9.71514	0.0006101	0.0230793
XM_004008666.3	9.4915	54.7683	-2.40322	0.00061056	0.023084
XM_012101588.2	0.47953	0.0212435	4.39313	0.000611174	0.0230865
XM_015105122.1	0.78469	34.3665	-5.48231	0.000611295	0.0230865
XM_004012973.3	0.645656	14.694	-4.45545	0.000615951	0.0232114
XM_015101934.1	7.85827	1.09943	2.94367	0.00062092	0.0233731
XM_012107576.2	0	0.13351	-13.9095	0.000623535	0.0234459
XM_012105210.2	0.0689198	0	11.506	0.000625346	0.0235005
XM_015103033.1	14.5417	89.0065	-2.59501	0.000625888	0.0235005
XM_015094371.1	0	0.0406617	-9.72291	0.000626011	0.0235005
XM_012180839.2	0.0186568	0.656512	-5.0413	0.000626872	0.02352
XM_015101995.1	0.287548	0	14.3297	0.000633069	0.0237137
XM_012187066.1	0	0.236318	-13.3903	0.000634371	0.0237496
XM_015095880.1	49.956	8.57624	2.62044	0.000634957	0.0237586
XM_012102690.2	8.13019	1.31678	2.69176	0.000637384	0.0238236
XM_012153228.2	0.31076	4.30162	-3.74319	0.000639853	0.0238899
XM_004017009.3	0.35068	0	11.369	0.000642268	0.0239671
XM_015092453.1	0.515468	0.00237167	7.46122	0.000647484	0.0241356
XM_004022884.3	12.8751	0.121731	6.5896	0.000654535	0.0243195
XM_012184642.1	0	0.188773	-11.3525	0.000659567	0.02448
XM_012095687.2	1.10271	0.0114038	6.69969	0.000661057	0.0245089
XM_015091711.1	1.88239	0.0681115	4.76153	0.000662871	0.0245497
XM_012107432.1	0	0.118463	-13.4013	0.000663237	0.0245501
XM_012107181.2	0.0909062	0	11.353	0.000668246	0.0246742
XM_012178788.2	0.553761	0	13.46	0.00066838	0.0246742
XM_012095693.2	0.0668627	0	14.0757	0.000671204	0.0247278
XM_004014148.3	0	0.066657	-13.631	0.000671267	0.0247278
XM_004004319.3	0	0.011158	-11.2231	0.000672797	0.0247709
XM_012187777.2	0	0.00445117	-11.1696	0.00067403	0.0247898
XM_012125032.2	0	0.228169	-13.627	0.000678882	0.0249416
XM_015097553.1	2.17082	0.12606	4.24796	0.000679864	0.0249643
XM_004003097.2	1.80862	0.00100917	10.2864	0.000682986	0.0250656
XM_012098765.1	0	0.293401	-13.3067	0.000684257	0.0250722
XM_015093700.1	0.108108	0	13.5514	0.000685434	0.0250977
XM_012188619.2	79.2639	9.02699	3.15431	0.00068568	0.0250977
NM_001306115.1	49.0937	0.332717	7.43658	0.000687961	0.025141
XM_012185234.1	0.847415	0	15.7891	0.000688774	0.0251574
XM_015097558.1	33.3546	0.00296317	13.1618	0.000690038	0.0251769
XM_004012972.3	0	0.289554	-7.89968	0.000690521	0.0251812
XM_012166287.1	0	3.53592	-13.2684	0.000699538	0.0254695
XM_012095275.1	0.460719	0.0011545	7.24811	0.00070021	0.0254806
XM_012184423.1	0.264531	0	11.8776	0.000701559	0.0255162
XM_004003306.3	0	0.110573	-11.4208	0.000702997	0.0255443
XM_004003336.3	123.883	24.4169	2.47276	0.000704579	0.0255855
XM_015100122.1	0.0330328	0.984371	-4.76383	0.000705558	0.0256002
XM_012096848.2	0	0.0163457	-9.42442	0.000706177	0.0256026
XM_015095547.1	0	0.0144932	-11.0868	0.000706537	0.0256026
XM_015092957.1	3.3057	0.44233	2.86444	0.000709451	0.0256829
XM_004016305.3	0.640496	0.00215067	8.21162	0.000711867	0.0257401
XM_012176690.1	0.124249	0	13.5759	0.000717653	0.0258828
XM_004004981.3	538.376	84.7233	2.74055	0.000722798	0.0260275
XM_012177042.2	0	0.0497055	-13.221	0.000724035	0.0260584
XM_015098435.1	0	0.120268	-13.2851	0.000730701	0.0262435
XM_015103055.1	0	0.0620662	-11.4176	0.000735507	0.0263611
XM_015103728.1	0.0028805	0.199368	-6.13118	0.00074124	0.0265114
XM_015100928.1	0.0423147	1.43822	-5.08591	0.000748983	0.026751
XM_004020602.3	0.41114	3.03521	-2.82796	0.000749229	0.026751
XM_004004447.3	0	0.12861	-9.64389	0.000749881	0.026751
NM_001252175.1	0.0846107	0	11.1916	0.000752899	0.0268448
XM_015100745.1	0.02452	0	11.8625	0.000754863	0.0269009
XM_012102722.2	0.310175	0.00326483	6.14689	0.000756207	0.0269071
XM_012162025.2	0.835626	0.00920833	6.49534	0.000757802	0.0269396
XM_012174711.2	4.52192	0.20228	4.60034	0.000759158	0.0269703
XM_012097039.1	0.00470517	0.464666	-6.47737	0.000760734	0.0269984
XM_012188369.1	0	0.273574	-13.1852	0.000762283	0.0270395
XM_012099838.2	0	0.172371	-13.5215	0.000764298	0.0270831
XM_015096153.1	42.7133	6.33896	2.8655	0.00076666	0.0271528
XM_012181584.1	0.0320078	0.591635	-4.29557	0.000767744	0.0271772
XM_012175191.2	0.0176397	0	11.5944	0.000769158	0.0272133
XM_015093232.1	0.12757	0	13.4007	0.000770482	0.0272461
XM_015104682.1	0.442663	2.85199	-2.72145	0.000772099	0.0272613
XM_012179552.2	0	0.201769	-10.9854	0.000774867	0.0273111
XM_012184854.2	0.187477	0	13.3084	0.000775095	0.0273111
XM_012178282.2	0.218896	0	13.5725	0.000775096	0.0273111
XM_015096583.1	0.322479	0.000330833	9.8975	0.000777879	0.0273771
XM_012122518.2	0	0.426772	-15.4073	0.000778162	0.0273771
XM_015099295.1	0.82165	0.0104403	6.3756	0.000784516	0.0275725
XM_012189012.2	0.00537767	0.463544	-6.31611	0.000786341	0.0276226
XM_015098221.1	1.66667e-07	0.116932	-11.9786	0.000788526	0.0276852
XM_012183794.2	0.941916	0.0325678	4.99246	0.000800629	0.0280387
NM_001009456.1	23.9321	144.797	-2.51131	0.000803483	0.0280958
XM_004004249.3	0.700729	0	15.5612	0.00080465	0.0281106
XM_012183038.2	0.529666	21.5446	-5.30362	0.000804722	0.0281106
XM_012099747.2	0.460206	4.62644	-3.22071	0.000805387	0.0281186
XM_012102691.2	0.582664	0.0423843	3.80892	0.000805768	0.0281186
XM_015100669.1	0.296231	0	13.7982	0.000806225	0.0281203
XM_004014232.2	988.55	192.189	2.49791	0.000807844	0.0281483
XM_012104959.2	0	0.0992538	-13.0915	0.00080994	0.0281787
XM_012181489.2	6.85768	1.2387	2.61323	0.000811719	0.028217
XM_004018913.3	17.3206	1.05798	4.11066	0.000812114	0.028217
XM_012099439.2	0.000132167	0.034875	-7.58435	0.000812273	0.028217
XM_012105966.1	0	0.0402778	-11.4218	0.000817815	0.0283809
XM_012150804.2	0	0.22514	-10.952	0.000820477	0.0284589
XM_015100535.1	0	0.300592	-9.70171	0.000821384	0.0284617
XM_012176773.1	0.00146267	0.831274	-8.97411	0.000824531	0.0285134
XM_015102750.1	0	0.265197	-15.3049	0.00083072	0.0286555
XM_012165941.2	0.264604	0	13.2378	0.000833114	0.0287237
XM_012103463.2	0	0.496915	-15.2916	0.000836801	0.0288075
XM_012102620.2	0.0116953	0	9.23484	0.000837403	0.0288139
XM_012180499.1	10.1362	0.452961	4.48134	0.000837889	0.0288162
XM_012102926.2	0.482066	0.0007165	9.506	0.000839043	0.0288415
NM_001009251.1	1.43963	27.5841	-4.21831	0.000850865	0.0291751
XM_012098868.2	1.26014	0.0291637	5.33511	0.000853281	0.0292229
XM_012162603.2	0.0832152	8.58333e-05	9.92579	0.000853539	0.0292229
XM_012179542.2	0	0.0443093	-10.8481	0.000858913	0.0293321
XM_012105086.2	0	0.0940817	-13.0828	0.000859683	0.0293321
XM_004004092.3	88.5508	15.773	2.50441	0.000859704	0.0293321
XM_012104084.2	0.00725933	0.756851	-6.42716	0.000862804	0.0294233
XM_012181703.2	0.182596	0	13.2683	0.000871021	0.0296156
XM_015094031.1	0.640242	3.38646	-2.34985	0.000878275	0.0298328
XM_004020168.3	3.02178	17.3118	-2.45829	0.000882805	0.0299423
XM_012187296.1	0.517301	0	15.3809	0.000884336	0.0299795
XM_004014493.3	0	0.216745	-10.8693	0.000887072	0.0300427
XM_012149428.2	0.263617	0.00349133	5.77111	0.000888079	0.030062
XM_012175595.2	0.447075	0	15.4053	0.000891574	0.0301233
XM_012181831.2	0	1.47058	-10.8915	0.000891946	0.0301233
XM_012176916.2	0	0.0599358	-11.2767	0.000897158	0.0302801
XM_012187295.1	0	0.111483	-13.3577	0.000897695	0.0302834
XM_012177786.2	0.792858	0	13.385	0.000898604	0.0302992
XM_012189793.2	0.309323	3.43836	-3.2808	0.000903829	0.0304456
XM_012181773.2	0	0.56329	-12.9769	0.000905209	0.0304771
XM_012105211.2	0	0.345531	-13.1332	0.000908456	0.0305566
XM_012105268.1	0	0.289836	-10.7688	0.00091174	0.0306371
XM_015097033.1	0.00211233	0.357828	-7.85957	0.00091813	0.0308161
XM_004005366.3	0.007828	5.34213	-8.84128	0.000926906	0.031071
XM_012135587.2	0	0.0429193	-12.9296	0.000929424	0.0311251
XM_012177615.1	0	2.74814	-15.1415	0.000932124	0.0311852
XM_012105538.2	0.189597	0	11.0268	0.000933709	0.0312079
XM_015101888.1	82.7526	11.8153	2.81873	0.000934763	0.031228
XM_004017062.3	0.36315	5.98475	-3.85502	0.000940251	0.0313293
XM_015097350.1	5.18284	0.545925	3.30985	0.000940458	0.0313293
XM_004022806.3	34.1434	0.144313	7.71209	0.000940526	0.0313293
XM_012179028.1	0	0.0777008	-12.8989	0.000941914	0.031346
XM_012188975.2	0.114147	0	13.5679	0.000941937	0.031346
XM_015100735.1	0.057105	1.25e-05	11.242	0.000942578	0.0313522
NM_001136489.1	113.202	21.6007	2.54282	0.000943825	0.0313674
XM_012137419.2	0	0.0152403	-12.9139	0.000943945	0.0313674
XM_012176583.2	57.9458	9.25892	2.7575	0.000947772	0.0314642
XM_012180570.2	21.46	119.313	-2.35946	0.000951957	0.0315423
XM_004021925.3	0	0.193073	-11.2027	0.000952786	0.0315546
XM_004010693.3	12.3552	65.3988	-2.37786	0.000953265	0.0315553
XM_012185424.2	0	0.227705	-10.9572	0.00095627	0.0316345
XM_012095119.2	0.61986	0.0377382	4.14139	0.000956576	0.0316345
XM_012177617.2	0	0.572261	-10.7294	0.000959563	0.0317164
XM_012100747.2	0	0.0835615	-12.9407	0.000959973	0.0317164
XM_015105276.1	125.302	15.3237	3.17035	0.000970774	0.0320003
XM_004011382.3	0.00270317	0.343316	-6.67809	0.000970859	0.0320003
XM_012105394.1	0.128453	0	13.1636	0.000970888	0.0320003
XM_012102275.2	0.116103	0.795198	-2.73605	0.000971667	0.0320085
XM_015103258.1	0	2.18094	-12.515	0.000972065	0.0320085
XM_012182044.2	0.326401	0	10.9291	0.000981353	0.0322526
XM_012116914.2	0.426095	0.0195057	4.70234	0.000990847	0.0324527
XM_004020455.3	0	0.0428993	-9.21964	0.000992918	0.0324932
XM_015096523.1	0.0209497	0.361473	-3.98845	0.000996911	0.0326084
XM_012161602.1	0.439179	0	10.9187	0.000999052	0.0326629
XM_004004924.2	326.848	70.2276	2.29023	0.00100252	0.0327296
XM_012138023.2	0.062055	0	11.1148	0.00100628	0.0328057
XM_004022375.3	11.692	1.72642	2.855	0.00100741	0.0328271
XM_012186469.2	0	0.192404	-12.8543	0.00100997	0.0328946
XM_012188926.2	0	0.305788	-15.0225	0.00101092	0.0328946
XM_015091841.1	0	0.082058	-11.0077	0.00101144	0.0328962
XM_012105524.2	0.389983	0	15.2034	0.00101591	0.0330104
NM_001009777.1	5.21724	0.363575	4.03268	0.00101653	0.0330149
XM_015098458.1	0	1.73363	-12.7903	0.00102052	0.033129
XM_012180723.2	0	0.0857123	-11.024	0.00102437	0.0332383
XM_015103250.1	1.26057	0.048693	4.63658	0.00102609	0.0332785
XM_012176953.1	0	0.100446	-11.0584	0.00103013	0.0333624
NM_001009763.1	7.46284	1.28243	2.62574	0.00103125	0.0333828
XM_012187294.1	0.44241	0	15.1552	0.00103201	0.0333918
XM_004006712.2	0.263047	0	9.05645	0.00103545	0.0334874
XM_015102393.1	0	1.44207	-12.7715	0.00103688	0.0335179
XM_015100176.1	0.0677493	0	9.46493	0.00103963	0.0335831
XM_015100021.1	0	0.130784	-8.97286	0.00104033	0.0335831
XM_012181518.2	0	0.0372858	-13.1695	0.00104524	0.0336829
NM_001009450.1	0.0237352	0	7.05963	0.00104665	0.0337072
XM_015103517.1	0.0340533	0	13.1157	0.00105043	0.0338131
NM_001308600.1	0.809149	14.5211	-4.13951	0.00105147	0.0338148
XM_012185540.2	0.295537	0	12.9065	0.00105566	0.0339022
XM_012181136.1	0.222704	0	12.9321	0.0010581	0.0339489
XM_012105619.1	0.8506	6.35985	-2.90446	0.00106389	0.0340871
XM_012185541.2	0	0.305241	-12.7348	0.00106892	0.0342149
XM_012173145.2	0	0.240816	-14.9307	0.00107709	0.0344457
XM_012174380.2	0.176327	0.000632833	7.86714	0.00107969	0.0344937
XM_012183074.2	0.113093	0	12.8738	0.00108003	0.0344937
XM_012162594.2	0.011159	0.432125	-5.17474	0.00108009	0.0344937
XM_015093275.1	1.74183	0.0512963	5.07878	0.00108205	0.0345404
XM_015094881.1	0.203464	0	15.0969	0.00108592	0.0346003
XM_015103521.1	0.0139773	0	10.794	0.00108594	0.0346003
XM_015094710.1	0.0302038	0	10.9724	0.0010892	0.0346698
XM_015093940.1	1.74823	0.0328148	5.82662	0.0010949	0.0348054
XM_015097065.1	0	0.0874023	-10.71	0.00109587	0.0348201
XM_012189828.2	0.0114365	0.580028	-5.65778	0.00109763	0.0348601
XM_012188348.1	0	0.0799525	-13.0677	0.00109975	0.0348853
XM_015097606.1	0	0.0201663	-11.2579	0.00109995	0.0348853
XM_004018241.2	0	0.579817	-12.6949	0.00110417	0.0349881
XM_004022430.3	0.282078	0	15.0886	0.0011042	0.0349881
XM_015103410.1	79.9526	11.4767	2.92676	0.00110647	0.0350277
XM_004014998.3	212.085	8.55746	4.52754	0.00110904	0.0350929
XM_012099501.1	0.577496	0.00244117	7.84991	0.00110979	0.0351005
XM_012100324.2	0.393912	0.0005965	9.14392	0.0011125	0.0351701
XM_004009524.2	44.0084	30430.4	-9.50454	0.00111543	0.0352305
XM_015095541.1	0	0.0878117	-14.8691	0.00112555	0.0354687
XM_004022909.2	10.0921	76.2792	-2.86303	0.00113186	0.0356326
XM_015097686.1	0.001055	0.207345	-7.51519	0.00113915	0.0357828
XM_012104509.2	0	0.2395	-15.2409	0.00114209	0.0358586
XM_012139102.2	0.919691	0	12.3427	0.00116152	0.0363736
XM_015095382.1	0	0.346538	-12.632	0.00116171	0.0363736
XM_015097646.1	0.00734167	0.303986	-5.26849	0.00116325	0.0363738
XM_012182495.2	0.203231	0	13.2021	0.00116508	0.0364147
XM_015094989.1	0	0.0284315	-8.65506	0.00116595	0.0364252
XM_012113716.2	0	0.046631	-9.38869	0.00116693	0.0364394
XM_012180565.2	0.178031	2.30286	-3.7461	0.00116869	0.0364614
XM_004012051.3	0.351078	0.0175355	4.43938	0.00116927	0.0364628
XM_004008092.3	0	0.149158	-13.1629	0.00117254	0.0365481
XM_015098941.1	0	0.107825	-7.22705	0.00117975	0.0367066
XM_012102983.2	0	0.358199	-14.8109	0.00118136	0.0367282
XM_015104484.1	0.985515	0	14.9551	0.00118504	0.0367897
XM_004013483.3	1.59122	28.3512	-4.11889	0.00118509	0.0367897
XM_015104458.1	0	0.166182	-13.3211	0.00118623	0.0368084
XM_015103713.1	6.26667e-05	0.0465812	-8.4229	0.00118907	0.03688
XM_012185134.2	33.7759	5.97428	2.59119	0.00120616	0.0372925
XM_012105396.2	0	0.00453217	-10.884	0.00120671	0.0372928
XM_012136934.2	0.132276	0	12.7328	0.0012094	0.037358
NM_001009339.1	0	0.0981405	-8.8734	0.00121288	0.0374161
XM_012176924.2	0	0.0658203	-9.02176	0.0012136	0.0374218
XM_012143578.2	0	0.0806523	-10.472	0.00121592	0.0374765
XM_015098168.1	111.89	0.722475	7.39641	0.00122086	0.0375932
XM_012102718.2	0	0.309275	-10.5001	0.00122252	0.0375932
XM_012187177.2	0	0.130719	-14.7706	0.00122298	0.0375932
XM_012126609.2	0	0.0158337	-12.5577	0.00122633	0.0376792
XM_012174678.2	0.192699	0.0020205	6.86728	0.00122757	0.0377006
XM_012188206.2	0.000748333	0.269604	-7.5798	0.00124542	0.0381312
XM_012175213.2	0.658487	0.00564367	7.0665	0.00125187	0.0382763
XM_004021385.3	0	0.0346502	-10.4347	0.00125915	0.038478
XM_015102725.1	48.3429	8.88817	2.55879	0.00125959	0.038478
XM_012183590.2	0	0.503533	-14.7265	0.0012631	0.0385527
XM_004012063.2	0.608795	0	13.5334	0.00126608	0.0385783
XM_012100434.2	5.74111	0.472418	3.66977	0.00127417	0.0387605
XM_015102997.1	11.5497	1.48724	3.00639	0.0012754	0.038772
XM_015096907.1	45.9288	235.642	-2.24309	0.00127638	0.0387847
XM_012177533.2	0.103994	0	12.7899	0.00128035	0.038888
XM_004004275.3	0	0.719512	-10.744	0.00128478	0.0389711
XM_015092659.1	4.07785	21.6507	-2.31449	0.00128787	0.039047
XM_012181922.2	0.195756	0	12.7297	0.00128873	0.039047
XM_004013192.3	0	0.0949118	-7.00064	0.00128898	0.039047
XM_012176892.2	0.566671	0	14.8331	0.00129441	0.0391596
XM_012160558.2	0.607558	0	12.8953	0.00130001	0.0392333
XM_015093292.1	0.197891	0	10.8035	0.00130026	0.0392333
XM_012106267.2	100.642	22.4569	2.24631	0.00130243	0.0392815
XM_004021563.3	0	0.131804	-12.4735	0.001304	0.0393117
XM_004021566.3	1.63466	384.569	-7.96855	0.00130604	0.0393562
XM_004019672.3	0.132723	2.13502	-4.04904	0.00131207	0.0394858
XM_015094993.1	0	1.98986	-12.791	0.00131582	0.039555
XM_012097334.2	0	1.10516	-14.6724	0.00131663	0.039555
XM_012099819.2	0.128896	3.73333e-05	10.1282	0.00131666	0.039555
XM_012181674.1	0	0.286315	-10.6828	0.00131795	0.0395763
XM_004002391.2	112.261	563.377	-2.32706	0.00132266	0.0396834
XM_012095997.1	0.22736	0.00225867	6.55844	0.00132438	0.0396922
XM_004005673.3	1.26178	7.55084	-2.53383	0.00132469	0.0396922
XM_012105092.2	0	0.0833003	-11.9215	0.00132815	0.0397614
XM_012182603.1	0	0.450854	-14.6486	0.00133084	0.0398247
XM_015100082.1	0.000672667	0.934713	-9.64746	0.00133264	0.0398545
XM_012186541.2	0.284216	7.70523	-4.72203	0.00133524	0.0399042
XM_015091965.1	19.2991	3.61977	2.53324	0.00133884	0.0399771
XM_012132759.2	0	0.0311125	-10.3849	0.00134502	0.0401443
XM_012107236.1	0	0.0700868	-10.2985	0.00134588	0.0401444
XM_004001784.3	0.011844	1.1553	-6.67334	0.00135352	0.040328
XM_012107022.2	0.1082	0.739024	-2.78236	0.00135784	0.0404392
XM_004004469.3	0.15616	0.939553	-2.54434	0.00135918	0.0404444
XM_012099516.2	0	1.15215	-12.4235	0.001365	0.0405999
XM_012173969.2	0	0.183933	-14.6138	0.0013671	0.0406116
XM_012126879.2	0.000843	0.772679	-9.60589	0.00136775	0.0406116
XM_015103139.1	0.501227	0.0333465	3.94618	0.00136996	0.0406596
XM_004011840.3	0	0.678501	-14.9686	0.00137878	0.0408861
XM_004004749.3	0.112242	0	10.6292	0.00138109	0.0409272
XM_012105856.1	0	0.04068	-6.73925	0.00138194	0.0409272
XM_015104712.1	0.001526	0.135721	-6.60096	0.00138558	0.0409995
XM_012174675.2	0	0.103407	-12.4601	0.0013994	0.0413551
XM_012174109.2	1.91393	0.152866	3.78485	0.00140134	0.0413834
XM_012106837.1	0	0.1096	-14.5743	0.00140441	0.0414321
XM_004021424.3	7.59712	0.964463	3.13811	0.00140875	0.0415246
XM_004016354.3	30.0978	2.15274	3.89094	0.00141375	0.0415825
XM_012108068.2	5.70631	0.639029	3.20472	0.0014142	0.0415825
XM_012183744.2	0.00982633	2.9672	-8.18216	0.00141632	0.0415825
XM_012150168.1	0	0.130854	-12.8329	0.00141853	0.0416017
XM_012175050.2	0.154101	0.0029355	5.72365	0.00142259	0.0416828
XM_012107979.2	3.29046	0.281906	3.63771	0.00142822	0.0417946
XM_004021401.3	0.19751	1.48015	-2.91689	0.00142897	0.0417987
XM_004019442.3	0	0.0704918	-14.5418	0.00143159	0.0418398
XM_015092971.1	0	0.139489	-12.3442	0.00143764	0.0419812
XM_004012233.3	4.66518	0.17346	4.75799	0.00144244	0.0420676
XM_012175591.2	0	0.0134667	-10.2505	0.00144331	0.0420754
XM_012096122.1	0	0.226961	-12.4141	0.00144818	0.0421994
XM_012181585.1	0.0022665	0.652385	-8.06877	0.00144916	0.0422102
XM_012183930.2	0.00567117	0	8.58268	0.00145083	0.0422408
XM_015100746.1	0.049336	0.000162667	8.12719	0.00145822	0.0424024
XM_012143461.2	0	0.260137	-13.2054	0.00146365	0.0425244
XM_015104475.1	0	0.0937988	-12.3229	0.00146719	0.0426091
XM_015093108.1	28.2046	5.61961	2.43476	0.00147172	0.0426914
XM_012112860.2	0.531433	0.00159883	8.0374	0.00147188	0.0426914
XM_012179036.1	0	0.175142	-14.4867	0.00147648	0.0427883
XM_012181379.2	0	0.299892	-14.4868	0.00147657	0.0427883
XM_012189868.1	0	0.118606	-12.3124	0.00147986	0.042814
XM_004004000.2	94.3812	21.5317	2.20846	0.00148046	0.042814
XM_015092933.1	1.85518	0.0153577	6.71144	0.00148314	0.0428555
XM_012098653.2	0	0.158987	-14.4803	0.00148575	0.0428949
TCONS_00134086	51.5149	11.0866	2.25948	0.00148891	0.042968
XM_012185795.2	0.000440833	0.785475	-10.2818	0.00149288	0.0430648
XM_012095845.2	0.104203	0	12.5182	0.00149939	0.0431981
XM_012104813.2	0.232421	0.00309217	6.11543	0.00150109	0.043229
XM_004023350.2	0.0762623	2.03004	-4.60955	0.00150507	0.0432914
XM_012119208.1	0	0.0149575	-10.1808	0.00150926	0.043392
XM_004007883.3	0.173869	0	14.627	0.0015116	0.043441
XM_012102213.2	6.6936	0.915733	2.95986	0.00151411	0.043477
XM_015094961.1	4.03483	30.2504	-2.85405	0.00151987	0.0436242
XM_012179718.2	53.4767	11.368	2.32556	0.00152311	0.0436625
XM_012144744.2	0.000701	0.243092	-8.26778	0.00152839	0.0437774
XM_012098914.2	14.7502	0.41936	5.1327	0.00152955	0.0437925
XM_012172538.2	0.139283	0	10.5369	0.00153201	0.0438446
XM_004014922.3	0.854798	0	11.4861	0.00155054	0.0443197
XM_012181667.2	4.68877	0.0268408	7.4227	0.0015544	0.0443933
XM_012187180.2	0.108328	0	14.6063	0.00156301	0.0446021
XM_012125007.2	0	0.110599	-12.5698	0.00156472	0.0446202
XM_012179902.2	33.6592	1.07852	5.05005	0.00156494	0.0446202
XM_012099994.2	0.102666	0.000904667	6.70331	0.00156907	0.0447195
XM_015099140.1	0	0.389841	-10.5499	0.0015706	0.0447444
XM_004002335.3	15.6714	76.0771	-2.24998	0.0015731	0.0447603
XM_012101924.1	0.556598	0	14.5942	0.00157421	0.0447734
XM_015098289.1	3.21602	0	12.8848	0.00157598	0.0447868
XM_012190176.2	2.60335	0.031253	6.21429	0.00157817	0.0448304
XM_012187328.1	27.9387	3.61482	2.95803	0.00157968	0.0448548
XM_012113385.2	0	0.101063	-12.2512	0.00158058	0.0448596
XM_004004552.3	0.0105272	0.171179	-4.02269	0.00158259	0.0448596
XM_004013835.3	10.4354	49.7122	-2.19125	0.00158388	0.0448596
XM_012181377.2	0	0.304995	-14.7785	0.00158441	0.0448596
XM_004006642.3	0	0.0124748	-12.2262	0.00158709	0.0449171
XM_012177028.2	0	0.0741862	-12.285	0.00159385	0.0450898
XM_015099504.1	0.0720327	0	10.8081	0.00159556	0.0451198
XM_015096146.1	0.011691	0	8.54015	0.00159791	0.0451364
XM_012177048.2	0.0225028	0	12.4988	0.00160754	0.0453098
XM_012104850.2	0.0594158	1.14113	-4.15427	0.00161092	0.0453865
XM_004016007.3	18.2255	0.958621	4.29282	0.00161385	0.045432
XM_004001901.2	0.00194717	3.1689	-10.3934	0.00161563	0.0454468
XM_012187607.2	0	0.621752	-14.3606	0.0016157	0.0454468
XM_015104894.1	0	0.518814	-12.5657	0.0016319	0.0458463
XM_015104789.1	0.270694	0	14.538	0.00163298	0.0458578
XM_004008970.3	5.40667	32.0949	-2.47271	0.00163793	0.0459408
XM_012181825.1	0.877379	25.0317	-4.77018	0.0016415	0.0460179
XM_012177928.2	0.0999148	0	8.44333	0.00164799	0.0461478
XM_004022945.3	29.0379	3.16339	3.328	0.00165944	0.0464119
XM_012145073.2	2.09625	0.0414487	5.68266	0.00166537	0.0465398
XM_012174444.2	0	0.155477	-14.3115	0.00167044	0.0466627
XM_015098062.1	0.663978	0.00222917	8.09784	0.00167132	0.0466683
XM_015095422.1	0.127023	0.761723	-2.45792	0.00167535	0.0467618
XM_012105154.2	0	0.00717333	-12.1618	0.00167754	0.0467994
XM_012183390.2	0.613125	0	14.4674	0.00167874	0.0467994
XM_012175085.2	0	0.0718383	-10.0576	0.00167974	0.0468085
XM_004017197.3	0	0.241351	-12.5172	0.00168259	0.0468508
XM_015102352.1	0.180739	0	12.3992	0.00168262	0.0468508
XM_012185281.2	1.09938	0.0346532	4.97948	0.00168725	0.0469609
XM_015100146.1	10.9056	0	14.4568	0.00168895	0.0469763
XM_012135485.2	0.082016	2.23346	-4.81118	0.00168936	0.0469763
XM_012139086.2	0.442791	0.00787267	5.63942	0.00168985	0.0469763
XM_012181158.2	0.00211317	0.685389	-7.97905	0.00169779	0.0471209
XM_012096856.1	0.208806	0	14.4767	0.00169878	0.0471293
XM_004006453.3	7.33333e-06	0.0395997	-10.0536	0.00170424	0.0472428
XM_012181295.1	0.0174482	0.589271	-4.97232	0.00170893	0.0473157
XM_012190438.2	0.904067	0.015893	5.83303	0.00171438	0.0474285
XM_015097973.1	2.72462	0	14.5262	0.00171613	0.0474504
XM_015098959.1	0.773618	0	14.5176	0.00171917	0.0475037
XM_012099344.2	0.0944398	0	12.5239	0.00172019	0.0475127
XM_012179512.1	0	0.716063	-10.8332	0.00172489	0.0476155
NM_001136491.1	8.87305	0.0315047	7.92936	0.00172529	0.0476155
XM_004001833.3	33.1276	4.58408	2.86451	0.00173227	0.0477481
XM_012099006.2	0.10927	0	10.2502	0.00173287	0.0477481
XM_012096573.2	0	0.0848663	-12.9445	0.00173834	0.0478798
XM_012103450.1	0.0106882	0	8.54667	0.00174214	0.0479511
XM_012174286.2	0	0.0582542	-10.3215	0.00174232	0.0479511
XM_012118445.2	0.252495	0	12.5745	0.00175366	0.0481861
XM_012102934.2	38.2871	8.44048	2.27541	0.00175752	0.0482469
XM_012184865.1	0	0.041731	-8.08784	0.00176382	0.048388
XM_012099905.2	0.193496	0	14.3907	0.0017657	0.0484204
XM_012181850.2	0.00366633	0.234713	-5.96623	0.00177312	0.0485502
XM_004009959.2	459.787	98.4447	2.24646	0.00177396	0.0485502
XM_015092798.1	0	0.0106562	-6.85416	0.00177698	0.048575
XM_012159299.2	226.688	32.9768	2.85677	0.00178201	0.0486723
XM_015101732.1	18.5131	0.0622448	8.12264	0.00178222	0.0486723
XM_012106195.2	0.315659	0	14.4632	0.00178266	0.0486723
XM_015096414.1	0.0105923	0.410456	-5.25787	0.00178424	0.0486866
XM_012175288.2	0	0.128922	-14.2201	0.0017846	0.0486866
XM_012181265.2	0	0.875028	-12.0501	0.00178686	0.0487028
XM_004004276.3	26.0402	131.742	-2.24895	0.00178713	0.0487028
XM_012113517.2	2.85196	0.0500767	5.76827	0.00178731	0.0487028
XM_012186217.1	0	0.460467	-12.7034	0.00178816	0.0487067
XM_004004751.2	91.1807	16.7151	2.60199	0.00179029	0.0487383
XM_012181153.2	0.973578	5.59711	-2.43396	0.00179661	0.0488018
XM_012095327.1	0	0.107959	-12.3939	0.00180049	0.048888
XM_012107587.2	0	0.11582	-12.0762	0.00180438	0.0489742
XM_012095260.2	0.221379	0	10.307	0.00180867	0.0490652
XM_012104116.2	0.161964	3.82868	-4.53445	0.00181395	0.0491758
XM_004022237.2	46.3667	10.6489	2.19291	0.00181721	0.0492448
XM_004018214.3	0.13775	1.29063	-3.17299	0.00182562	0.0494531
XM_012097716.2	0	4.9725	-14.1886	0.00182701	0.0494714
XM_012099479.2	0.309173	0	11.0264	0.00183852	0.049666
XM_012106847.2	0.502178	0	14.3269	0.00184262	0.0497572
XM_012180112.2	0	0.158517	-12.0023	0.00184633	0.0498183
XM_012184138.2	0.634099	11.4881	-4.0984	0.00184724	0.0498235
XM_015096384.1	0	0.134368	-12.3539	0.00184991	0.0498716
XM_012095957.2	1.07993	0.0165718	6.02729	0.00185047	0.0498716
XM_012180241.2	0	0.00589933	-10.1559	0.00186053	0.0501033
XM_012188379.2	0.339485	0	12.2295	0.00186247	0.050136
XM_012180217.2	0	0.0414397	-10.1265	0.0018648	0.0501791
XM_012143293.2	0	0.108907	-11.9819	0.00187297	0.05034
XM_015097348.1	0.652636	4.07201	-2.56112	0.00187599	0.0504016
XM_015098564.1	24.7871	5.0741	2.31091	0.00187808	0.0504368
XM_012187772.1	0	0.0868142	-8.0006	0.00188034	0.0504594
XM_004017877.3	0	1.11289	-14.1428	0.00188884	0.0506676
XM_004004952.3	64.5412	323.398	-2.22184	0.00189292	0.0507179
XM_015102493.1	0	0.136764	-12.405	0.00189439	0.0507375
XM_015096536.1	0.303224	0.00323833	6.51054	0.0019021	0.0508848
XM_012165968.2	0.124472	0	12.1459	0.0019038	0.0508901
XM_015097436.1	0.09257	0	12.8229	0.00190776	0.0509373
XM_012189633.2	4.87023	26.302	-2.34021	0.00190859	0.0509397
XM_012098997.2	0	0.030113	-14.1249	0.00191037	0.0509673
NM_001252180.1	6.53143	0.567907	3.5332	0.00191549	0.0510842
XM_015098779.1	207.587	978.053	-2.26303	0.00191768	0.0511228
XM_012103724.1	6.95029	56.0649	-2.96377	0.00192467	0.0512218
XM_012177744.2	0.895403	0.00567317	7.4377	0.00192511	0.0512218
XM_004022266.3	0.00283567	0.20087	-5.47963	0.00192978	0.0513262
XM_012104188.2	1.19515	0	12.945	0.00193865	0.0515224
XM_015096977.1	0	0.479023	-14.4776	0.00194201	0.0515916
XM_015092183.1	0	0.219672	-11.9269	0.00195413	0.0518648
XM_015102816.1	0	0.0261623	-10.1874	0.00195726	0.0519168
XM_015104094.1	14.9264	67.0869	-2.11805	0.00197287	0.0522472
XM_004022821.2	45.7146	8.45838	2.47839	0.00197678	0.0522944
XM_015102604.1	0.164033	2.03412	-3.62593	0.0019774	0.0522944
XM_012183795.2	0.476775	0.00843833	5.93116	0.00197757	0.0522944
XM_012124735.2	0	0.169437	-14.0759	0.00197954	0.0523265
XM_015097297.1	0	0.37506	-14.0625	0.00199311	0.0526649
XM_004014062.2	0.022465	0.659351	-4.75754	0.00199496	0.0526936
XM_012176680.2	0	0.266945	-12.5286	0.00199911	0.0527829
XM_015095338.1	0.0470117	0	8.36185	0.00200104	0.0527995
XM_012170978.2	0.00140683	0.338807	-8.02034	0.00200127	0.0527995
XM_012104091.2	0.0188932	0	8.66513	0.00200353	0.0528126
XM_015097318.1	46.6103	5.72764	2.94594	0.00200504	0.0528126
XM_012095345.1	0.33747	0	12.1795	0.00200531	0.0528126
XM_015092293.1	0.129295	0	10.1697	0.00200637	0.0528126
XM_012103397.2	0	0.0371182	-12.24	0.00200944	0.0528734
XM_012186668.2	0	0.0538325	-10.041	0.00201873	0.0530887
XM_012181986.2	0	0.0175645	-11.8902	0.00202686	0.0532503
XM_015092271.1	0	0.025739	-6.36996	0.00202777	0.053254
XM_012100853.2	77.7488	11.3115	2.84705	0.00202979	0.0532866
XM_012099080.2	0	0.0999028	-11.8668	0.00203629	0.0533962
XM_015097623.1	0	0.104089	-9.80245	0.00203931	0.0534551
XM_012176584.2	28.7993	5.16618	2.55753	0.00205304	0.0537944
XM_004002036.3	0	0.46868	-14.0081	0.00205812	0.0538865
XM_015093701.1	0.041233	0	12.1502	0.00206217	0.053972
XM_004005119.3	48.5173	10.3623	2.36632	0.00207236	0.0541976
XM_012187084.2	0.0300968	0.000232	6.19156	0.00207968	0.0543479
XM_015096270.1	0	0.0468945	-13.9915	0.00208089	0.0543588
XM_015092335.1	0.015522	0.863643	-5.49017	0.00208858	0.0545391
XM_012188877.2	0.0637297	0	10.1478	0.00209375	0.0546327
XM_004011750.3	46.2714	8.92643	2.4104	0.00209542	0.0546554
XM_012106384.2	0	0.106429	-11.829	0.00209759	0.054656
XM_004018141.3	0.667242	0.0135045	5.51143	0.00209782	0.054656
XM_012099758.2	0.006451	0.612371	-6.37536	0.00210298	0.0547283
XM_015103768.1	0.00150733	0.156706	-6.84284	0.00210694	0.0547899
XM_015103288.1	0	0.0331435	-8.56158	0.00212275	0.0551717
XM_012178811.2	0	0.306587	-11.8181	0.0021268	0.0552229
XM_015093128.1	57.7718	13.2383	2.18083	0.00213093	0.0552887
XM_015103732.1	0.0869797	1.59235	-4.18462	0.00213646	0.0553695
XM_004001971.3	0.258243	1.86723	-2.79405	0.00214491	0.0555675
XM_015105090.1	0	0.643361	-12.5179	0.00215712	0.0557875
XM_012177216.2	0.0041115	0.193211	-5.3795	0.00215745	0.0557875
XM_012175284.2	0	0.0207648	-11.7829	0.00216516	0.0559083
XM_012190599.2	0.0415268	0	8.43391	0.00216862	0.0559504
XM_012104244.2	0	0.0377325	-8.4124	0.00217251	0.0560088
XM_012179479.2	0	0.217195	-12.0045	0.00217436	0.0560151
XM_015102811.1	0	0.198961	-11.7757	0.00217438	0.0560151
XM_004001885.3	0	0.2319	-13.9249	0.00217918	0.0560967
XM_012097421.2	2.5e-06	0.214964	-10.6374	0.00218027	0.0561038
XM_015096529.1	0	0.0273678	-11.862	0.00218547	0.0561901
XM_012101207.2	0.816226	0.0807797	3.23442	0.00218614	0.0561901
XM_015096463.1	0	0.115799	-14.2995	0.00218688	0.0561901
XM_004018382.3	0.12228	0	14.0983	0.00219274	0.0562986
XM_015095658.1	1.51416	0.13637	3.60131	0.00219681	0.0563822
XM_012176804.2	0.135493	0.004385	5.10627	0.0022028	0.0564938
XM_004012696.3	0	0.0272978	-8.12585	0.00220496	0.0565069
XM_012190433.2	21.1077	2.39077	3.26079	0.00223307	0.0570165
XM_015096845.1	0.0721017	0	12.0877	0.00223546	0.0570552
XM_012126192.2	0.0358678	0	11.9556	0.0022364	0.057058
XM_012173562.2	0.584008	0	14.0648	0.00225955	0.0575132
XM_012102629.2	0	0.216282	-13.8626	0.00226009	0.0575132
XM_012101455.2	19.3683	3.5929	2.51728	0.0022761	0.0577927
XM_004008157.3	0.209632	0	11.8787	0.00228137	0.0579051
XM_012102635.2	36.9438	8.67641	2.18617	0.00228376	0.0579231
XM_012183029.1	1.08365	8.47619	-2.90612	0.00229261	0.0580701
XM_012101805.2	0.23268	0	11.8513	0.00229683	0.0581475
XM_015094349.1	0.30118	0	14.0138	0.0023067	0.058242
XM_015096896.1	0.931731	0	13.996	0.00230713	0.058242
XM_004008790.3	1.28309	15.7977	-3.67063	0.00230726	0.058242
XM_015101948.1	0	0.0119132	-8.06104	0.00230946	0.058242
XM_012099939.1	0.0958828	0.000689	7.19327	0.00231063	0.058242
XM_004020580.2	0.041784	0	7.96508	0.00231071	0.058242
XM_004013666.3	6.56233	0.335743	4.42183	0.00231834	0.0584129
XM_012106454.2	0.00398133	0.174705	-5.44758	0.00232717	0.0585927
XM_015092906.1	0	0.00837933	-11.7727	0.00233268	0.0587099
XM_004021152.3	0	0.0216758	-8.12976	0.00233417	0.058726
XM_012127393.2	0	0.0659713	-11.6578	0.00233751	0.0587886
XM_004020101.3	22.2204	4.11455	2.50036	0.00234199	0.0588579
XM_012175166.2	0.000530667	0.527986	-9.99057	0.00234283	0.0588579
XM_012097169.2	3.38371	0.51633	2.73028	0.00234663	0.0588888
XM_004022285.3	0.0820175	0	13.9939	0.00235566	0.0590401
XM_004013137.3	142.754	34.1235	2.10505	0.00235698	0.0590401
XM_015091787.1	0.196585	0.00695133	4.85068	0.00235813	0.0590401
XM_004002227.3	1.59054	13.1623	-2.87986	0.00236053	0.059044
XM_012098941.2	0.0207052	0.832787	-5.23131	0.00237256	0.059271
XM_004013851.3	2.80026	21.3383	-2.80596	0.00237304	0.059271
XM_004002395.3	0.0128627	3.46538	-7.95341	0.00237744	0.0593593
XM_015103889.1	3.36726	0.681873	2.31593	0.00238214	0.0594337
XM_015093097.1	0	0.195387	-11.6242	0.00238466	0.0594672
XM_012175637.2	0	0.0921678	-9.66501	0.00238863	0.0595309
XM_004014417.3	1.71582	0.0196942	6.48054	0.00239559	0.0596771
XM_012097189.1	0.0663297	0	9.90908	0.00239623	0.0596771
NM_001308452.1	366.779	77.9801	2.31567	0.00240044	0.0597603
XM_015098038.1	0	0.181797	-13.7673	0.00240486	0.0598486
XM_015093626.1	0	0.275012	-11.9713	0.00240824	0.0599112
XM_015097603.1	0	0.0184895	-11.7891	0.00240937	0.0599177
XM_012119233.2	0	0.037244	-11.6019	0.002417	0.060079
XM_015096986.1	0	0.0089355	-8.48133	0.0024176	0.060079
XM_015099626.1	0	0.0115792	-9.89594	0.00242161	0.0601351
XM_015099859.1	28.0902	132.321	-2.18389	0.00242922	0.0603025
XM_012188389.2	0.108937	0	11.9164	0.00243883	0.0604292
XM_012101170.2	0	0.0476488	-11.6347	0.00243947	0.0604292
XM_012108032.1	4.50629	0.359881	3.72328	0.00244047	0.0604292
XM_012107209.2	0.0790275	0	13.9403	0.00244754	0.0605609
XM_015094139.1	0	0.0177498	-9.54683	0.00245141	0.0606347
XM_012095132.2	0	0.413191	-13.732	0.00245554	0.0607151
XM_004019473.3	0.24088	0	8.04377	0.00245934	0.0607872
XM_012180378.2	0	0.061553	-11.5756	0.0024633	0.0608633
XM_012106459.2	0.0180715	1.90599	-6.53421	0.00246801	0.0609578
XM_004006744.3	0.17405	0	13.9267	0.00247018	0.0609896
XM_015102291.1	0.128758	0	9.73285	0.00247706	0.0611074
XM_012144522.2	0.000889	0.274555	-8.20706	0.00247761	0.0611074
XM_012104562.1	2.01177	0	13.8709	0.00249552	0.0614609
XM_015099583.1	0.116809	0	12.0401	0.00251072	0.0617863
XM_015104868.1	0.0226343	0	11.7186	0.0025167	0.0618182
XM_012187292.1	0	0.148818	-13.699	0.00251701	0.0618182
TCONS_00256333	0	0.536026	-8.0929	0.0025172	0.0618182
XM_015103571.1	43.6697	9.42796	2.29541	0.00252322	0.0619438
XM_012185087.2	0.0771692	0	9.66071	0.00253258	0.0621236
XM_015105009.1	0.108143	0	12.1741	0.00253788	0.062215
XM_015091752.1	0.198071	1.63345	-2.97116	0.00255152	0.0625049
XM_012105345.2	5.04038	0.372432	3.73604	0.0025547	0.0625176
XM_012184855.2	0.307191	0	13.8341	0.00255476	0.0625176
XM_015096821.1	0	0.0151483	-10.6172	0.00255817	0.0625689
XM_004010178.3	0.124189	0.686569	-2.36085	0.00256215	0.0625874
XM_012183892.2	0.028555	0.248677	-3.09064	0.00256439	0.0625977
XM_015103003.1	0.748539	3.99921	-2.40781	0.00256688	0.0626363
XM_015100774.1	0	0.028035	-7.99081	0.00256923	0.0626625
XM_004007873.3	0.222303	0.0174758	3.71558	0.00259083	0.0630642
XM_012107777.1	0	0.148935	-11.4955	0.00259476	0.0631377
XM_012107644.2	0	0.267141	-11.4766	0.00260211	0.0632495
XM_012178722.2	0	0.433723	-13.639	0.00260604	0.0633227
XM_012175576.2	0.832009	0.00634983	7.12796	0.00260965	0.063388
XM_012097144.2	0	0.0113455	-11.5234	0.00261275	0.0634408
XM_004014412.3	1.77584	10.4772	-2.52088	0.00261464	0.0634644
XM_004020262.3	0	0.0718393	-11.4718	0.00261703	0.063465
XM_004006450.3	0	0.0439218	-11.4727	0.00261947	0.0634923
XM_012176568.2	1.42253	0.00354117	8.77405	0.00262257	0.063545
XM_012095415.2	0	0.08922	-7.80332	0.00263733	0.0638802
XM_015092692.1	0.0235688	0	9.81087	0.00264313	0.0639531
XM_012140581.2	0.028786	0.195489	-2.72235	0.00264718	0.0639642
XM_012103836.2	0.0390803	1.40361	-5.31091	0.00264877	0.0639772
XM_015096985.1	4.91265	1.06188	2.28066	0.00265964	0.0641274
XM_012103365.2	0	0.00851817	-9.79307	0.00266604	0.0642235
XM_004021935.3	0.0350743	0.631822	-4.19908	0.00267091	0.0643091
XM_015094491.1	0.0768527	0	11.7216	0.00268413	0.0644933
XM_015098903.1	0.279502	0	11.8018	0.00268511	0.0644933
XM_012182674.2	3.40247	0.556795	2.71038	0.00269372	0.0646549
XM_012189615.2	0.0486738	0	13.8517	0.00269626	0.0646723
XM_015093629.1	0.084068	0	12.3294	0.00269755	0.0646723
XM_012188375.2	0.232659	0	11.6924	0.00270141	0.0647267
XM_015092416.1	0.299287	0	13.7452	0.00270389	0.0647421
XM_012105026.2	0	0.0649538	-11.4182	0.00270518	0.0647494
XM_012106636.2	0.0843635	0.0008465	6.92525	0.00270611	0.0647494
XM_012177771.2	0	0.0278185	-7.96331	0.00271086	0.0647983
XM_015097390.1	0.0194282	0	8.14048	0.00271628	0.0648575
XM_015100671.1	0	0.148819	-11.7745	0.00271771	0.0648691
XM_012179440.2	0.0504243	0	12.6631	0.00272659	0.0649996
XM_015093406.1	0	0.0250323	-11.4154	0.0027312	0.0650782
XM_015098374.1	0.149026	0	6.57415	0.00273651	0.0651231
XM_012097993.1	0.0023365	0.562715	-7.45481	0.00274404	0.0652361
XM_012100971.1	0.00507067	0.534169	-6.44148	0.0027454	0.0652361
XM_012176098.2	0.159316	0	8.17234	0.0027454	0.0652361
XM_012175633.2	0.0395285	0	9.71397	0.00274643	0.0652382
XM_004021705.3	0.294407	0	11.7217	0.00274758	0.0652398
XM_012099513.1	0	0.0449058	-9.99264	0.0027484	0.0652398
XM_012104254.1	0	0.121042	-11.4716	0.0027529	0.0653242
XM_015095649.1	37.9948	7.74117	2.35274	0.00275821	0.0654052
XM_012182075.2	3.31909	0.0898557	5.36814	0.00276018	0.065407
XM_012178637.2	0.582247	0	13.8189	0.00276172	0.0654209
XM_015104735.1	0.00144333	0.0917738	-5.03741	0.00277503	0.065691
XM_015102764.1	0.852204	0.00342267	7.89516	0.00277618	0.0656955
XM_012180943.2	0.201256	0	8.64725	0.00277912	0.0657427
XM_012182667.2	0.0826228	0	11.7892	0.00278638	0.0658288
XM_015101373.1	0.00103067	0.0882838	-6.60531	0.00278651	0.0658288
XM_012173916.2	5.15e-05	0.0995597	-9.09613	0.00278659	0.0658288
XM_015092172.1	0	0.554917	-13.9425	0.00279158	0.0659015
XM_012189632.2	8.53898	40.4121	-2.16815	0.002795	0.0659175
XM_004022862.2	50.8122	9.95619	2.38891	0.00279513	0.0659175
XM_012184389.2	65.3581	323.451	-2.21161	0.00279856	0.065976
XM_012182321.2	1.00419	5.13013	-2.34109	0.00280371	0.0660746
XM_012095558.2	30.9092	5.79796	2.48917	0.00280702	0.0661244
NM_001129904.1	0.75687	0	13.7905	0.0028177	0.0663137
XM_004011657.3	2.70398	12.9871	-2.22136	0.00282192	0.0663624
XM_012171664.2	0.0845975	1.61974	-4.2532	0.00282362	0.0663624
XM_004013848.2	26.8098	130.737	-2.1984	0.00282696	0.066418
XM_015101264.1	0.156195	0	10.4439	0.00283557	0.0665845
XM_015101797.1	0.132733	0	10.1074	0.00283694	0.0665845
XM_004022895.3	0.704647	0	10.0411	0.00284741	0.0667848
XM_012189312.2	5.06921	0.644904	3.01476	0.00285369	0.0669014
XM_012105957.2	0	0.121664	-11.3351	0.00286167	0.0670508
XM_004015292.3	4.9882	0.157475	4.93566	0.00286376	0.0670541
XM_015104456.1	0	0.189301	-13.4988	0.00286632	0.0670912
XM_012098710.2	0	0.155293	-11.7228	0.00286826	0.0671139
XM_012096244.2	0.489677	0	13.742	0.00287401	0.0671657
XM_015102906.1	0.0236313	0	13.6497	0.00287685	0.0671778
XM_004009091.3	0.157779	1.23213	-2.96	0.0028803	0.06719
XM_012101589.2	0.058714	0	8.11837	0.00288183	0.06719
XM_012105958.2	0	0.120686	-11.3229	0.00288487	0.0672283
XM_015099696.1	0.00153733	0.617474	-8.39132	0.00288908	0.0673016
XM_012095397.2	0.0833738	0	11.67	0.00288997	0.0673016
XM_012098433.1	0.89777	0	13.6597	0.00289142	0.0673126
XM_015100386.1	19.2112	4.68101	2.07372	0.00289824	0.0674432
XM_012152057.2	0.027778	0.772588	-4.62305	0.00289898	0.0674432
XM_012180329.2	0	0.191005	-13.4702	0.00290328	0.0674749
XM_012174397.2	0	0.927202	-13.4686	0.00290817	0.0675279
XM_004015174.3	0	0.532941	-10.5915	0.00290817	0.0675279
XM_012180274.2	0	0.142866	-11.7304	0.00291268	0.0675793
XM_012181406.1	0.0807028	0	13.6287	0.00292081	0.0677
XM_012183946.2	0.12853	0	13.6558	0.00292295	0.0677
XM_012105770.2	0.010242	0	9.54816	0.00292412	0.0677
XM_012139276.1	0.0471847	0	11.846	0.00292451	0.0677
XM_004021937.2	2198.87	296.703	2.88678	0.0029289	0.0677276
XM_004013563.3	2.70872	14.2521	-2.32655	0.00293034	0.0677382
XM_012178687.2	0.0668887	0	11.8546	0.00293137	0.0677391
XM_015097029.1	0.125072	0	11.4826	0.00294634	0.0680165
XM_012099663.2	0.111832	0	13.6369	0.00295599	0.0682165
XM_012096642.2	0	0.0944005	-12.3601	0.00296631	0.0684317
XM_004018292.3	0	0.06494	-9.60105	0.00297713	0.0686125
XM_012096445.2	1.16124	0	13.6211	0.00299127	0.0688691
XM_012177189.2	0.0142312	0	7.74861	0.00299344	0.0688781
XM_004012389.3	13.9532	61.0603	-2.10484	0.00299413	0.0688781
XM_012141053.2	0.209067	0	13.59	0.00299736	0.0689173
XM_015098437.1	14.0536	2.93746	2.3545	0.00299987	0.0689289
XM_015104444.1	0	0.0379675	-9.59557	0.0030088	0.0690881
XM_015098943.1	20.3053	2.29202	3.06635	0.00301226	0.0691444
XM_012185793.2	0	0.132742	-11.3728	0.00301611	0.0691868
XM_015096233.1	0.051607	0	11.5168	0.00301762	0.0691982
XM_015098909.1	0	1.28372	-11.2456	0.00302269	0.0692622
XM_004009737.3	47.7216	3.95718	3.62875	0.00302342	0.0692622
XM_012139048.2	0	0.132216	-13.8114	0.00302665	0.0693131
XM_012097311.2	0.0483002	0.890271	-4.11379	0.00302884	0.0693402
XM_012107405.2	0	0.168911	-11.6229	0.00303012	0.0693465
XM_012187681.2	0.0581158	0.87101	-3.99372	0.00303593	0.0694563
XM_012097653.1	0	0.0932432	-10.1415	0.00303875	0.0694746
TCONS_00082118	0.652794	0.00770517	6.64987	0.00304871	0.0695869
XM_012103706.2	0.508158	0.00819117	6.03966	0.00305349	0.069673
XM_012185076.2	0.0297288	0	8.23224	0.00306227	0.0697809
XM_004004891.3	0	0.0739025	-9.35533	0.00306801	0.0698653
XM_012139085.2	1.54201	8.19946	-2.37787	0.00307288	0.0699532
XM_012101408.2	0	0.10625	-11.22	0.0030787	0.0700507
XM_015102601.1	19.8568	4.15141	2.3362	0.0030792	0.0700507
XM_015096585.1	0	0.53015	-13.3823	0.00308734	0.0701896
XM_012097697.1	0	0.046441	-9.30353	0.00309607	0.0703418
XM_015095257.1	0.00300483	0.220936	-6.40011	0.00311305	0.0706808
XM_012190342.1	0	0.140018	-9.23335	0.00311925	0.0707748
NM_001308579.1	0.123595	2.6574	-4.26331	0.00312445	0.070826
XM_012182098.2	0	0.0970328	-13.3629	0.00312804	0.070881
XM_012099600.2	0.0852832	0	13.5353	0.00314205	0.0711281
XM_012100089.2	0	0.295438	-7.45798	0.00314356	0.0711391
NM_001009439.1	17.8817	2.7291	2.87212	0.00314821	0.0712209
XM_004003192.3	3.33684	16.1834	-2.25233	0.00315343	0.0712949
XM_015093895.1	6.0876	30.2778	-2.25624	0.00317173	0.0715884
XM_012189789.2	0.0670163	0	11.3694	0.00318546	0.0718748
XM_004016302.3	0.167057	0	9.72218	0.0031946	0.0719632
XM_012174758.2	0	0.243425	-11.1889	0.00319985	0.072041
XM_015099380.1	0	0.081951	-13.3288	0.00320015	0.072041
XM_015100557.1	2.3959	0	13.4858	0.00320219	0.0720634
TCONS_00206625	2.79317	0.279784	3.38562	0.00322131	0.0723754
XM_012184196.2	0.774154	0.0021885	8.14903	0.00323059	0.0725604
XM_012143281.2	0	0.113021	-11.9193	0.00323294	0.0725634
XM_012177977.2	2.31515	0.00268967	9.7504	0.00323494	0.0725634
XM_004003552.3	95.2942	23.1107	2.12944	0.00323853	0.0726034
XM_012139277.2	0	0.113922	-13.3052	0.00324478	0.0726984
XM_012100843.2	0.479614	0.00656233	6.10352	0.00324518	0.0726984
XM_012185159.2	0	0.435655	-11.235	0.00325165	0.072796
XM_012101851.2	6.78853	0.742248	3.36375	0.00325279	0.0727978
XM_012122844.2	0.10313	4.85e-05	10.1735	0.00325897	0.0728695
XM_015092898.1	0.0114087	0	13.4685	0.00325916	0.0728695
XM_012175600.2	0	0.119535	-13.2822	0.00328448	0.0734116
XM_004010183.3	0.372206	1.66667e-07	8.7368	0.0033021	0.0737336
XM_012099983.2	0.0458142	0	6.21944	0.00330478	0.0737697
XM_015092202.1	0.212911	0	13.4423	0.00330824	0.0738229
XM_012105060.2	0	0.202945	-11.1264	0.00331737	0.0739787
XM_012180252.2	0.00868017	1.00737	-6.75098	0.00332192	0.0740323
XM_004021691.3	7.67287	1.49445	2.44575	0.00332355	0.0740446
XM_012188597.2	5.47238	0.711062	3.00241	0.00332474	0.0740473
XM_004017389.3	0	0.0489975	-11.0748	0.00333443	0.074167
XM_012139967.2	0.124309	0	11.3555	0.0033436	0.0743231
XM_012106753.2	0.380431	0	11.2657	0.00334812	0.0743515
XM_004004456.3	1.62164	14.1005	-3.01738	0.00336165	0.074484
XM_012180989.2	0.0647728	0.000508833	4.88791	0.00336524	0.0745396
XM_012182897.2	0	0.0301838	-11.0625	0.00336667	0.0745473
XM_015095471.1	0	0.163185	-13.2413	0.00336942	0.0745841
XM_015093505.1	0	0.0672932	-9.12646	0.00337521	0.0746882
XM_012182377.1	0.0613497	0.000205833	8.21384	0.00337824	0.0747313
XM_015100995.1	0.726325	0.0636088	3.69097	0.00338607	0.0748791
XM_015093352.1	28.1919	6.68674	2.22834	0.0033896	0.0749104
XM_015094048.1	0	0.00602733	-11.4121	0.00343002	0.0756012
XM_015092094.1	0	0.166751	-11.0458	0.00343186	0.0756018
XM_004022465.3	0.153893	2.31878	-3.87117	0.00343512	0.0756494
XM_015102487.1	0	0.0663903	-11.3097	0.00344293	0.0757974
XM_004020818.3	5.68572	28.7741	-2.25816	0.00346484	0.0761822
XM_012189535.2	0.572668	0	13.3757	0.0034765	0.0763899
XM_012097363.2	1.53383	0.00654083	7.88292	0.0034794	0.0764292
XM_015096193.1	0	0.120834	-11.0682	0.00348484	0.0764756
XM_015097217.1	0.0576458	0	13.3656	0.00349994	0.0766359
XM_015092456.1	0.0188738	0.237095	-3.54824	0.00350193	0.0766551
XM_015103494.1	0	0.054177	-7.51536	0.00350767	0.0767564
XM_012108150.2	0	0.10078	-7.49312	0.00351887	0.076977
XM_004006457.3	1.92139	0.00194067	10.064	0.00352124	0.0770045
XM_004006548.3	0	0.0581068	-11.3388	0.00352462	0.0770294
XM_012187314.2	0.00510133	0.460188	-6.69005	0.00352462	0.0770294
XM_012095507.2	1.16441	0.000589333	10.2031	0.00353818	0.0772769
XM_015096566.1	0	0.178904	-13.1639	0.0035409	0.0772797
XM_012189613.2	0.00415167	0	9.51216	0.00354121	0.0772797
XM_012179714.2	0	0.0157698	-11.442	0.00354287	0.0772797
XM_015096557.1	0.147178	0	11.1803	0.00354481	0.0772797
XM_012186077.2	0	0.168359	-11.0065	0.00354579	0.0772797
XM_015098769.1	0.314615	0	11.8165	0.00354606	0.0772797
XM_012174969.2	0.0142203	0	11.2741	0.00354756	0.0772797
XM_012177579.2	0	0.0887035	-13.1605	0.00354848	0.0772797
XM_015101311.1	187.159	19.6683	3.34413	0.00355797	0.0774145
XM_004022364.3	0	0.214372	-13.1564	0.00355943	0.0774172
XM_012122377.2	0.0554082	0.522021	-3.04521	0.00356959	0.0774903
XM_012107660.2	0	0.221335	-11.3642	0.00357457	0.0775315
XM_004009041.3	0.010426	0.505119	-5.75738	0.00357908	0.0775799
XM_012183394.2	0	0.198127	-10.9765	0.00358441	0.0776708
XM_015099382.1	0	0.0815915	-13.1414	0.00358776	0.0777189
XM_012174536.2	0	0.132589	-13.1307	0.00360749	0.078012
XM_012104077.2	0.509076	0	11.2653	0.00361518	0.0780787
NM_001252178.1	1.77447	0.0405855	5.70037	0.0036157	0.0780787
XM_012122634.2	2.0215	0.327463	2.44785	0.00361905	0.0781265
XM_004003193.3	0	0.163032	-9.31897	0.00362278	0.0781323
XM_012124102.1	0	0.0783833	-13.1221	0.00362352	0.0781323
XM_015097327.1	59.7743	16.2555	2.01159	0.00362385	0.0781323
XM_015105312.1	0.0592392	0	7.47244	0.00362505	0.0781337
XM_015094652.1	0.629729	4.48787	-2.81228	0.00362887	0.0781916
XM_015098976.1	0	0.0272292	-5.98048	0.00363046	0.0782014
XM_012112814.2	0	0.168341	-10.9533	0.00364186	0.0783575
XM_004005355.3	3.96293	16.8621	-2.05765	0.00364226	0.0783575
XM_004016711.3	0.179187	1.54889	-3.10246	0.00364641	0.0783977
XM_015092706.1	0.0252973	1.68037	-5.9784	0.00364954	0.0784406
XM_015094527.1	0	0.242817	-13.1133	0.00365228	0.078475
XM_012104382.1	1.43427	0.0352117	5.42485	0.00365507	0.0785105
XM_012097326.2	0.370766	0.0355595	3.54027	0.00366251	0.0786213
XM_012165494.2	0	0.0302053	-10.9667	0.00366734	0.0787004
XM_012141077.2	295.145	79.8298	2.00253	0.00368232	0.0789236
XM_004006847.3	3.49897	29.2618	-2.99776	0.00369278	0.0790745
XM_004010741.3	2.03207	0.0410533	5.59884	0.00369772	0.0791237
XM_012185091.2	0.0548147	0	9.14764	0.00370718	0.0792591
XM_012182341.2	0.11483	0	10.8277	0.00371098	0.0793158
XM_015099265.1	0	0.439323	-10.9451	0.00371493	0.0793509
XM_004022834.3	4.16907	0.111612	5.0644	0.00372272	0.079482
XM_012097707.2	0	0.103404	-10.99	0.00372397	0.079482
XM_004008811.2	17.9002	94.0425	-2.30965	0.00372624	0.079482
XM_012095807.1	0	0.692593	-10.9137	0.00372764	0.079482
XM_012105863.2	0	2.34049	-12.5983	0.00373181	0.0795141
XM_015101244.1	0	0.0841243	-11.0341	0.0037353	0.0795639
XM_012187212.1	0	0.0612212	-13.0772	0.00373756	0.0795875
XM_012100283.2	0	0.307709	-11.6345	0.00375707	0.0798341
XM_004018490.2	0.000538333	0.407816	-8.77661	0.00375841	0.0798341
XM_015103586.1	0	0.0744522	-10.8988	0.00376718	0.0799464
XM_015103302.1	0	0.00858533	-7.41962	0.0037709	0.0800007
XM_012106366.2	0.0992262	0	13.2544	0.00377406	0.0800021
XM_004007939.2	0.0641665	3.39813	-5.70087	0.00377754	0.0800421
XM_012189084.2	0	0.277706	-13.048	0.00378164	0.0800421
XM_004020443.3	0	0.0493175	-13.0474	0.00378184	0.0800421
XM_012095607.2	0	0.686943	-10.9376	0.00378331	0.0800421
XM_015104347.1	0	0.0026615	-9.13311	0.00378848	0.0801269
XM_012189310.2	14.3645	1.85036	2.96629	0.00378986	0.0801314
XM_012184577.1	0	0.0543853	-11.4977	0.00379162	0.080144
XM_012096602.2	0	0.0909852	-13.0447	0.00379291	0.0801467
XM_015100549.1	0.0137697	0.577917	-5.13559	0.00379493	0.0801648
XM_015097658.1	0.00839417	1.7011	-7.60643	0.00379937	0.080234
XM_015092387.1	3.50413	0.736259	2.37353	0.00380423	0.0802996
XM_012178719.2	0.001692	0.30731	-7.20019	0.00380594	0.0802996
XM_012096581.2	0	0.0905785	-13.0381	0.00380714	0.0802996
XM_012117904.2	0.559793	0	11.1145	0.00380923	0.080319
XM_015096047.1	0	0.0743015	-11.2506	0.00381255	0.0803645
XM_004006059.3	0	0.108445	-13.0353	0.00381708	0.0804137
XM_015092678.1	34.2909	9.13946	1.99605	0.0038175	0.0804137
XM_012179694.2	0.5381	0.0288678	4.37279	0.00381838	0.0804137
XM_012096120.2	0	0.35017	-13.0286	0.00383566	0.0807035
XM_004004014.3	126.379	33.103	2.02336	0.00383683	0.0807035
XM_015097454.1	0.967175	6.37098	-2.662	0.00384216	0.080791
XM_012187150.2	0	0.0833897	-13.0241	0.00385379	0.0809612
XM_012162398.2	1.76515	10.3936	-2.53776	0.00385496	0.0809612
XM_015091760.1	0.0607285	0	9.09266	0.00386991	0.0812257
XM_004009699.2	0	0.103278	-13.007	0.00388021	0.0813674
XM_015102494.1	0.128747	0	11.1439	0.00388584	0.0814479
XM_004013686.3	0	0.202559	-10.9647	0.00388641	0.0814479
XM_012108361.2	4.48779	0.123492	5.25074	0.00389255	0.081527
XM_015096560.1	0	0.0134812	-9.22363	0.00390327	0.0817126
XM_015095067.1	48.9364	11.8228	2.12632	0.00390379	0.0817126
XM_004023093.3	3.83118	0.332929	3.58558	0.0039106	0.0818305
XM_015105137.1	0.001058	0.045006	-4.83375	0.00391651	0.0818795
XM_012103794.2	0.159768	0.959592	-2.61509	0.00392194	0.0819432
XM_012113950.2	0	0.0614157	-11.6733	0.00392868	0.0820591
XM_015101692.1	0.325827	1.83662	-2.46721	0.00393143	0.0820796
XM_012096597.2	0	0.0871927	-12.9832	0.00393908	0.0822016
XM_015099525.1	0.000337333	0.218864	-9.38975	0.00394287	0.0822178
XM_015104963.1	0	0.261412	-10.818	0.00394344	0.0822178
XM_004002570.2	0.459066	0.019315	4.61798	0.00395563	0.0824221
XM_012190374.2	2.75724	0.279863	3.38762	0.00396841	0.0826338
XM_004007692.3	0.629987	3.1914	-2.30226	0.0039745	0.0826903
XM_015099223.1	5.13605	0.261298	4.44264	0.00397815	0.0827412
XM_015105187.1	2.15996	0.0157805	6.96354	0.00398314	0.0827951
XM_004008181.3	0.0541703	0	9.05458	0.00398544	0.0828177
XM_004017807.3	0	0.438618	-11.1697	0.0039979	0.0830279
XM_004006063.3	0	0.102939	-12.9602	0.00400295	0.0830661
XM_015097867.1	0	0.038135	-12.959	0.00400462	0.0830661
XM_012112998.2	0.0847772	0	10.9904	0.00401918	0.0832792
XM_012187063.2	0	0.152834	-12.9519	0.00401973	0.0832792
XM_004007807.3	7.13165	28.6616	-1.95309	0.00402772	0.0833945
XM_004006789.2	0	0.0361655	-11.0533	0.00404136	0.0836016
XM_015103877.1	6.88743	1.55154	2.23212	0.00405004	0.0837559
XM_015095668.1	0.00797433	0.241084	-4.88802	0.0040575	0.083885
XM_012113214.2	0	0.214752	-12.9306	0.00407157	0.0841077
XM_012184980.2	0.57107	0	10.9676	0.00407193	0.0841077
XM_012183120.2	1.12038	0	13.1302	0.00407341	0.0841129
XM_012131090.2	0	0.133739	-11.1774	0.00407498	0.0841202
XM_004011755.3	2.1276	10.3385	-2.19675	0.00407662	0.0841288
XM_015096563.1	0	0.169229	-12.9259	0.00408088	0.0841915
XM_012102935.1	2.48983	0.0196582	7.17277	0.00408653	0.0842828
XM_012105265.2	0.018151	1.503	-6.21048	0.00408926	0.0843139
XM_015100394.1	0	0.145479	-10.8739	0.00409696	0.0844474
XM_015099792.1	0.0307395	0	9.0915	0.00410301	0.0845433
XM_012104300.2	0.153485	0	10.9698	0.00410647	0.0845433
XM_015093246.1	0.0197392	0	5.92224	0.00410722	0.0845433
XM_012177974.2	8.11667e-05	0.243772	-10.4693	0.00411863	0.0847141
XM_012175267.1	0	0.0444188	-11.3347	0.00411968	0.0847141
XM_004014441.2	22.9033	124.342	-2.4225	0.00412372	0.08472
XM_012175689.2	0	0.113682	-10.7482	0.00412723	0.0847669
XM_012099534.2	18.6104	2.16768	3.16252	0.00414	0.0849543
XM_015100591.1	0.289864	0.00101967	7.65383	0.00414129	0.0849543
NM_001162556.1	5.4638	0.0016925	11.259	0.00415317	0.0851213
XM_015094770.1	0.000888833	0.862216	-9.60824	0.00415464	0.0851213
XM_012129622.2	0	0.164344	-12.896	0.0041556	0.0851213
XM_015096624.1	0	0.0535942	-12.8906	0.00416178	0.0851719
XM_015098332.1	2.17239	12.3626	-2.38425	0.00416619	0.0852347
XM_004021960.3	2.52508	12.3578	-2.20809	0.00417619	0.0853906
XM_004008913.3	19.3198	5.26876	1.93782	0.0041962	0.0857235
XM_012113366.2	0	0.16288	-12.8781	0.00420229	0.0858223
XM_015097128.1	0.0549543	0	13.0414	0.0042048	0.08584
XM_004017950.3	16.4854	65.878	-1.95602	0.00421757	0.0860324
XM_015101226.1	0	0.0700618	-12.8678	0.00422751	0.0861842
XM_012176431.2	0	0.0233317	-12.8622	0.00424655	0.0864275
XM_012187151.2	0	0.0745047	-12.8615	0.00424697	0.0864275
XM_004008996.3	0	0.0149058	-8.83942	0.00426369	0.0867167
XM_012105648.2	0	0.0274883	-10.7822	0.00426496	0.0867167
XM_015104215.1	44.7604	9.70697	2.28091	0.00427336	0.0867851
XM_012106465.2	0	0.0241495	-12.8437	0.00427773	0.0867969
XM_004002525.2	4.23727	43.5745	-3.34057	0.00427998	0.086817
XM_012144364.2	0.10011	1.66667e-07	10.5933	0.0042849	0.0868706
XM_012184922.2	0	0.0350258	-7.32233	0.00428514	0.0868706
XM_012108172.2	13.1444	1.95337	2.80277	0.00429718	0.0870377
XM_012176819.2	0.017877	0.659898	-5.05594	0.00430812	0.0872338
XM_012095888.2	0.00766383	0.48738	-5.90048	0.0043144	0.0873096
XM_012180389.2	0.167895	1.08863	-2.85534	0.00432227	0.0874432
XM_015093347.1	0.153277	1.81491	-3.51067	0.00433337	0.0875648
XM_015098893.1	10.4944	0.818967	3.85816	0.00433989	0.0876142
XM_015103664.1	0	0.266759	-11.1834	0.00434193	0.0876142
XM_012183811.2	0.315144	0	11.9553	0.00434326	0.0876142
XM_015103364.1	0.176148	0	12.987	0.00434344	0.0876142
XM_012122533.2	0.00785017	4.12976	-8.89274	0.00435715	0.0878135
XM_012102599.2	0.534172	3.25489	-2.63726	0.0043596	0.0878373
XM_012173569.2	0.273423	0	13.0097	0.00437229	0.0880672
XM_012099246.2	0	0.130794	-12.8082	0.00437583	0.0880716
XM_004001988.3	805.138	199.026	2.09552	0.00437635	0.0880716
XM_012187191.2	0.107169	0	12.9736	0.00438009	0.0881108
XM_004008907.2	51.8584	12.2387	2.23203	0.00438358	0.0881142
XM_012103537.2	0.0275855	0	11.0745	0.00438747	0.0881408
XM_012190566.1	0.893513	0	12.9834	0.00440178	0.0883769
XM_004006062.3	0	0.0921382	-12.8003	0.00440641	0.0884441
XM_015103695.1	0	0.0518952	-12.7985	0.00440981	0.0884607
XM_012182694.1	0	0.66947	-12.786	0.00443384	0.0888911
XM_012175202.2	0.209901	0	13.0624	0.00443536	0.0888957
XM_012187245.2	1.26739	7.69944	-2.54651	0.00444588	0.0890288
XM_012184444.2	0.002746	0.139062	-5.49353	0.00444944	0.089056
XM_012182599.1	0.1598	0	13.0377	0.00445279	0.089056
XM_015100747.1	0.0521425	0	12.9492	0.00445445	0.089056
XM_004002242.3	0	0.0926735	-12.7773	0.00446462	0.0892015
XM_015095486.1	0	0.119305	-10.7274	0.00446824	0.0892015
XM_015101227.1	0	0.033908	-9.0884	0.00446875	0.0892015
XM_015100605.1	7.30345	35.7274	-2.25733	0.00447651	0.0893305
XM_012188173.2	0.0374835	0.203365	-2.37714	0.00448186	0.0893855
XM_015092881.1	0.299613	1.52559	-2.3011	0.00449363	0.0895424
XM_015092999.1	0.000691833	0.043609	-5.05059	0.00451035	0.0897976
XM_015100662.1	0.281412	0	12.9451	0.00451224	0.0898093
XM_012183751.2	0	0.0222867	-10.9214	0.00451942	0.0899263
XM_012167855.2	0.561851	0.000664	9.88176	0.0045225	0.0899615
XM_012183097.2	0.015876	0	7.36164	0.00453442	0.0901206
XM_015097301.1	0	0.15238	-12.7529	0.00454298	0.0902249
XM_015096908.1	21.4856	92.059	-2.02033	0.0045436	0.0902249
XM_012112039.1	0	0.00434567	-10.6142	0.00455237	0.0903281
XM_012180651.1	0.631552	8.98482	-3.70272	0.00456019	0.0903835
XM_004003021.3	0	0.123506	-12.7472	0.00456279	0.0903975
XM_012096115.2	2.17325	0.0176463	7.05311	0.00456848	0.0904582
XM_012104264.2	0.0199437	1.15936	-5.74272	0.0045742	0.0904934
XM_012164328.2	0	0.188154	-10.6605	0.00458476	0.0906764
XM_012102579.2	0.588109	0	12.8953	0.0045944	0.0908354
XM_015097401.1	0	0.0371652	-12.7299	0.00459726	0.0908354
XM_004021350.1	1.64504	9.63749	-2.39778	0.00459918	0.0908354
XM_012174699.1	0.003982	0.129044	-4.8101	0.00460203	0.0908354
XM_004005985.3	126.874	8.15637	4.13663	0.00460362	0.0908408
XM_012183104.2	0.190709	0	12.907	0.00461284	0.0909445
XM_012098728.2	0.0383848	0.78213	-4.36235	0.00462178	0.0910687
XM_012105948.2	0.086907	0	8.87217	0.00463326	0.0912166
XM_012103754.2	0.0637625	0	12.8806	0.00463794	0.0912826
XM_015103593.1	0	0.043757	-12.7155	0.00464195	0.0913231
XM_004010762.3	0	0.0448552	-11.1676	0.00464498	0.0913231
XM_012104129.2	0.0995038	0	12.8925	0.00464663	0.0913231
XM_015104982.1	0.00507517	0.248439	-5.42103	0.00465156	0.091368
XM_015096525.1	0	0.0105617	-10.597	0.00466297	0.0915455
XM_012181410.2	0.074225	0	12.8695	0.00466552	0.0915455
XM_012106715.2	0	0.0501128	-8.37083	0.00467108	0.0916207
XM_015096198.1	0.011003	0	10.7296	0.0046768	0.0916611
XM_015097493.1	0	0.0375672	-9.00177	0.00468614	0.0918115
XM_012099343.2	0.142171	0	12.8643	0.00469084	0.0918774
[truncated: 35,070 more rows]

## Sheet: DE analysis of lncRNA
ID	AN_FPKM	SE_FPKM	log2FoldChange	pvalue	padj
TCONS_00159208	2.52544	0	17.4154	2.39751e-22	1.27042e-18
TCONS_00070741	27.828	0	16.2418	1.45008e-18	3.84192e-15
TCONS_00133120	7.40197	0	16.4428	2.18069e-12	1.75511e-09
XR_001031331.2	0	5.55354	-13.942	4.8312e-12	3.57852e-09
TCONS_00130668	0	0.350169	-14.4112	2.22221e-11	1.4174e-08
TCONS_00177474	58.209	0	18.2211	5.48133e-11	3.19989e-08
TCONS_00124908	0.386276	0	14.763	6.33942e-11	3.66973e-08
TCONS_00070739	5.40079	0	13.8873	1.51738e-10	8.23039e-08
TCONS_00177479	154.221	0.0990723	10.7083	2.44493e-10	1.28566e-07
TCONS_00229643	13.0319	0	16.5912	9.0933e-10	4.23244e-07
TCONS_00126476	0	0.400773	-13.9062	9.15553e-10	4.23281e-07
TCONS_00067908	0.290494	0	13.0226	9.68121e-10	4.446e-07
TCONS_00149208	15.9237	0.0597847	8.27155	1.05965e-09	4.8023e-07
TCONS_00136505	0	6.69026	-12.7139	1.11862e-09	5.03641e-07
TCONS_00222834	0	0.415035	-13.6389	1.7006e-09	7.18695e-07
TCONS_00159202	1.14679	0	16.9507	1.5036e-08	5.17884e-06
TCONS_00182969	4.7335	0	11.7263	2.30775e-08	7.53422e-06
TCONS_00001473	0	0.365605	-11.7763	2.6027e-08	8.37802e-06
TCONS_00106036	1.32707	0	11.8951	3.73961e-08	1.13985e-05
TCONS_00124909	0.305995	0	14.2976	5.58802e-08	1.59725e-05
TCONS_00234081	0	0.446767	-14.2435	6.52963e-08	1.79203e-05
TCONS_00092506	0	0.271681	-13.183	7.34842e-08	1.98511e-05
TCONS_00019689	0.516486	0	13.5692	9.43803e-08	2.44417e-05
TCONS_00029249	0	0.279554	-13.3441	1.05221e-07	2.67464e-05
TCONS_00001553	0.591922	0	10.8095	2.99986e-07	6.49838e-05
TCONS_00100001	0.620197	0	12.926	3.18456e-07	6.81279e-05
TCONS_00135447	0.7903	0	11.4494	3.69234e-07	7.75459e-05
TCONS_00124867	0.4273	0	11.9017	4.07458e-07	8.5055e-05
XR_001434070.1	0.346782	0	12.771	4.40226e-07	9.03566e-05
XR_001436113.1	1.07133	0	10.8751	4.42605e-07	9.03566e-05
TCONS_00238127	0	0.471629	-11.7456	5.12778e-07	0.00010285
XR_001435446.1	0.194955	0	12.7297	5.20825e-07	0.000103692
XR_001021459.2	0	0.087405	-11.2962	5.24103e-07	0.000104044
TCONS_00016307	0.383219	0	10.3671	7.27588e-07	0.000137065
TCONS_00196209	2.47638	0	15.5686	9.44732e-07	0.000169476
TCONS_00036173	0	0.253232	-14.6987	1.00066e-06	0.000175046
TCONS_00032145	0	0.352975	-12.4636	1.23304e-06	0.000207675
TCONS_00241897	9.36889	245.377	-4.76554	1.26794e-06	0.000212514
TCONS_00062293	0	0.412825	-11.2309	1.33926e-06	0.000220687
TCONS_00257421	0	1.08355	-10.5217	1.43457e-06	0.00023307
TCONS_00168210	0	1.04778	-11.4398	1.50717e-06	0.000242012
XR_001435887.1	0	0.370449	-12.0735	1.72775e-06	0.000270494
TCONS_00119097	0.662936	0	12.089	1.78876e-06	0.00027815
TCONS_00128605	0.24272	0	12.4316	1.81759e-06	0.000281475
TCONS_00177472	52.1996	0	18.4136	1.91106e-06	0.000293196
XR_001434061.1	0.043528	0	9.91818	2.15058e-06	0.000324618
XR_001041206.1	0	0.628755	-10.5146	2.24841e-06	0.000336704
XR_001435445.1	0.126543	0	12.0977	2.53197e-06	0.000371892
TCONS_00009486	0.508919	0	11.7389	2.60993e-06	0.000381715
TCONS_00138635	1.7037	0	11.9939	2.9262e-06	0.000422587
TCONS_00136507	0	3.12587	-11.5522	3.24644e-06	0.000457968
TCONS_00043538	12.8534	0.016111	9.63127	3.44694e-06	0.000476799
XR_001435634.1	0.20322	0	10.1699	3.55895e-06	0.000486178
TCONS_00103462	0	0.319972	-11.5501	3.62439e-06	0.000491476
TCONS_00092060	0	0.30054	-11.9728	3.6432e-06	0.000492525
TCONS_00036894	0	0.431435	-12.1769	3.77625e-06	0.000507077
TCONS_00127002	0.47699	0	9.53195	3.82372e-06	0.000510467
TCONS_00141957	0	0.432741	-11.3146	3.88381e-06	0.000517486
XR_001434095.1	0	0.100635	-11.8778	4.24775e-06	0.000556293
TCONS_00001770	0.317629	0	12.5084	4.55214e-06	0.000589434
TCONS_00121293	0.4024	0	11.814	4.69956e-06	0.00060511
TCONS_00134312	0	0.348619	-11.6262	4.7252e-06	0.000607276
TCONS_00121292	0.455263	0	11.975	5.38366e-06	0.000680475
XR_001433876.1	0	0.0685135	-9.62514	5.57163e-06	0.000699946
TCONS_00070740	8.18311	0.0122078	9.38851	5.87576e-06	0.000719596
TCONS_00221036	7.41852	0.010195	9.40605	5.88121e-06	0.000719596
TCONS_00254814	1.03958	0	10.3873	6.4503e-06	0.000774104
TCONS_00170815	0	0.305381	-8.97969	6.49569e-06	0.000778195
TCONS_00042179	0	0.283961	-9.54938	6.86853e-06	0.00080323
XR_001435110.1	0	0.0629305	-11.2711	7.03515e-06	0.000813252
XR_001025146.1	1.32222	0	10.9625	7.63574e-06	0.000872297
XR_001043300.2	0.39612	0	9.38155	8.00507e-06	0.000911466
TCONS_00045723	1.12966	0	12.0659	8.03253e-06	0.000913083
XR_001435403.1	0.603056	0	11.1077	8.08938e-06	0.000918031
TCONS_00118970	0	0.309004	-13.3783	8.35829e-06	0.000942339
TCONS_00130457	0	0.328979	-11.0174	8.56211e-06	0.000961874
TCONS_00102290	4.33989	0	15.4707	8.79891e-06	0.000980137
TCONS_00158420	0.198718	0	11.8376	9.08465e-06	0.00100129
TCONS_00196208	0.837379	0	13.9025	9.25569e-06	0.00101689
TCONS_00223467	227.416	1.65661	7.32462	9.35501e-06	0.00102512
TCONS_00029738	0.552103	0	10.832	1.02232e-05	0.00109866
TCONS_00102611	0	0.416664	-9.44612	1.09405e-05	0.00116303
TCONS_00044990	0	0.545665	-9.62922	1.16889e-05	0.00122552
TCONS_00184034	0.53171	0	11.2363	1.18808e-05	0.00124003
TCONS_00092507	0	0.245954	-13.1732	1.3509e-05	0.00135851
TCONS_00132065	0	0.238168	-9.62405	1.43269e-05	0.00141393
TCONS_00047030	0	0.755551	-8.55213	1.48695e-05	0.00144989
TCONS_00123848	0	0.201991	-12.7339	1.52851e-05	0.00147884
TCONS_00010926	0	0.156132	-12.5508	1.63082e-05	0.00156029
TCONS_00126474	0	0.145721	-13.1823	1.86306e-05	0.00174642
TCONS_00101891	0	0.376742	-10.5562	1.90577e-05	0.00177647
XR_001044194.2	0.212988	0	12.8498	1.94269e-05	0.0018007
TCONS_00252672	0	0.313433	-10.4859	1.94539e-05	0.0018007
TCONS_00060940	0	0.309576	-10.7522	1.94745e-05	0.0018007
XR_001434037.1	0	0.061015	-11.1882	1.95713e-05	0.00180481
TCONS_00151324	0.114961	0	9.84133	1.98137e-05	0.00181886
TCONS_00159210	0.197418	0	12.9544	1.99277e-05	0.00182205
TCONS_00149551	0	0.305164	-12.5254	2.03372e-05	0.00185066
TCONS_00185641	0.160535	0	12.7785	2.09832e-05	0.00188947
TCONS_00125995	0	0.176688	-8.92189	2.106e-05	0.00189392
TCONS_00074636	0	0.407934	-8.80257	2.25595e-05	0.0020052
TCONS_00090145	0	0.14643	-10.8906	2.31081e-05	0.00204144
TCONS_00071951	0.19588	0	9.33423	2.50476e-05	0.00217857
TCONS_00182975	0.66554	0	8.18203	2.61119e-05	0.00223737
TCONS_00248581	0	0.312539	-10.212	2.63707e-05	0.00225102
TCONS_00111248	0	0.28399	-9.04016	2.64448e-05	0.00225234
XR_001042479.2	0	0.225753	-10.3398	2.69425e-05	0.00228005
TCONS_00103056	0	0.166019	-12.3118	2.82581e-05	0.00237389
TCONS_00058637	0.195628	0	11.0634	2.95074e-05	0.0024698
XR_001023119.2	0.19444	0	10.5757	3.14132e-05	0.00260087
TCONS_00121295	0.624749	0	12.4401	3.22237e-05	0.00265521
XR_001044618.2	0.680454	0	10.0946	3.31364e-05	0.00270775
TCONS_00029746	0.52439	0	10.1187	3.42378e-05	0.00276977
XR_001041525.1	0	0.182171	-12.3973	3.44673e-05	0.00278022
TCONS_00051403	5.6319	0.211752	4.83894	3.63114e-05	0.00289843
XR_001039678.2	0.427863	0	14.396	3.77277e-05	0.00298725
TCONS_00222464	0.325862	0	10.3536	3.78414e-05	0.00299282
XR_001433707.1	0.243774	0	10.0066	3.84465e-05	0.00301997
TCONS_00141966	0	0.993955	-10.049	3.8872e-05	0.00304635
TCONS_00151652	1.33544	0	12.5719	3.95638e-05	0.00307954
TCONS_00213186	0	0.284436	-9.90909	3.96308e-05	0.00308127
TCONS_00109561	0.27336	0	8.66654	4.02315e-05	0.00311586
TCONS_00031034	0.627334	0	10.1429	4.02566e-05	0.00311586
TCONS_00101441	0.481644	0	10.1302	4.08645e-05	0.00315222
TCONS_00067910	0.258843	0	7.82769	4.09094e-05	0.00315222
XR_001436961.1	0	0.234829	-10.0533	4.14625e-05	0.00317707
TCONS_00045720	0.84809	0	10.3046	4.31284e-05	0.00327919
TCONS_00242989	0.001171	0.664253	-7.59196	4.37658e-05	0.00330938
TCONS_00009353	0.0084835	4.72034	-9.07062	4.52031e-05	0.00339941
TCONS_00234903	0	0.420586	-7.57711	5.00723e-05	0.00371289
TCONS_00098501	0.256694	0	8.61074	5.02542e-05	0.00371838
TCONS_00022607	0.196319	0	11.9493	5.05455e-05	0.00373592
TCONS_00208790	0	0.569592	-9.72263	5.13272e-05	0.00378919
TCONS_00205216	0	0.204811	-9.79639	5.37037e-05	0.00392721
TCONS_00070738	5.66127	0.016139	8.64948	5.39732e-05	0.00393023
TCONS_00234108	0	0.225632	-12.0685	5.83123e-05	0.00414114
TCONS_00152135	0	0.202015	-11.5961	6.37824e-05	0.00446062
TCONS_00151205	0.724948	0	11.7661	6.4528e-05	0.00448545
XR_001024753.1	0	0.262195	-8.18566	6.51109e-05	0.00451341
TCONS_00092505	0	0.149954	-12.2023	6.55197e-05	0.00453548
TCONS_00214779	0	0.214351	-9.58204	6.72824e-05	0.00462741
TCONS_00015691	0.207885	0	11.889	6.74366e-05	0.00462741
TCONS_00130658	0	0.180847	-13.5652	6.78201e-05	0.00464861
TCONS_00167123	0	0.319271	-9.38139	6.83146e-05	0.00465933
TCONS_00202820	0	0.205878	-9.49868	6.86037e-05	0.00466627
TCONS_00062270	0.184214	0	12.2415	6.94265e-05	0.0047072
XR_001040647.1	0.0576362	0	7.85309	7.20166e-05	0.00482581
TCONS_00046848	0	0.570171	-9.58267	7.40051e-05	0.00493984
TCONS_00004249	0	0.529058	-11.4056	7.72975e-05	0.00512744
TCONS_00222833	0	0.226648	-13.7804	7.94425e-05	0.00524184
TCONS_00047071	0	0.248306	-7.72737	7.98288e-05	0.00525082
TCONS_00149044	0	0.311795	-9.89403	7.98924e-05	0.00525082
TCONS_00161078	0.188654	0	11.6688	8.09829e-05	0.00530789
TCONS_00079209	0.278364	0	9.89911	8.32279e-05	0.00540872
XR_001023832.2	0.00897317	3.09013	-8.26941	8.50953e-05	0.00551966
TCONS_00231076	0	0.518653	-10.2286	8.59991e-05	0.00556257
TCONS_00221039	0.187279	0	7.26862	9.00516e-05	0.00575092
TCONS_00168200	0	0.468025	-15.4425	9.70924e-05	0.00608028
XR_001020910.2	0	0.0818938	-7.39601	9.78124e-05	0.0061198
XR_001023391.1	0	0.287904	-9.58509	9.87753e-05	0.00617444
TCONS_00101716	0.271678	0	13.5624	0.000100524	0.00624407
TCONS_00056177	0	0.109876	-11.3065	0.00010338	0.00639265
TCONS_00022426	0	0.279409	-10.0609	0.000106978	0.00657152
TCONS_00136486	0	0.384422	-8.10509	0.000115891	0.00698451
TCONS_00189789	0.229062	0	11.3355	0.000117323	0.00705225
TCONS_00131857	0	0.716391	-9.50077	0.000117569	0.0070609
TCONS_00139214	0	0.341645	-10.0994	0.000119512	0.00715887
TCONS_00045105	0	0.222382	-12.3854	0.0001243	0.00738217
TCONS_00254812	0.419011	0.000364167	7.79354	0.000124311	0.00738217
XR_001436407.1	0	0.0357873	-9.12498	0.000128972	0.00760646
TCONS_00011952	0.845846	0	9.2797	0.000130961	0.00769743
TCONS_00256381	0.633575	0	9.39869	0.000132965	0.00777735
XR_001434029.1	0	0.0373637	-10.834	0.000136247	0.00791078
TCONS_00111203	0	0.170188	-9.43296	0.000137762	0.007968
TCONS_00210846	87.9144	9.37529	3.27983	0.00014152	0.00811089
TCONS_00232169	12.3554	0.564207	4.55002	0.000141528	0.00811089
TCONS_00215075	0.28411	0	9.26594	0.000142659	0.00815537
TCONS_00161088	1.98319	0.0551518	5.08527	0.000142835	0.00815865
XR_001025000.2	0	0.153228	-8.00789	0.000143771	0.00819849
TCONS_00223466	4.50355	0	14.1819	0.000151363	0.00854658
TCONS_00254986	0	0.346687	-11.1322	0.00015489	0.0087171
TCONS_00160963	0	0.368178	-10.7709	0.000157366	0.00882043
TCONS_00178491	0.158474	0	9.68067	0.000158125	0.00885448
TCONS_00222830	0	0.129047	-8.84367	0.000161215	0.0089705
TCONS_00227470	0	0.210691	-10.6943	0.00016265	0.00900854
XR_001024166.2	0.063377	10.0516	-7.36465	0.000164245	0.0090731
TCONS_00101436	0.185814	0	8.84816	0.000164682	0.00909
TCONS_00224088	0	0.831419	-9.02989	0.000172889	0.00942961
TCONS_00222465	0.448634	0	10.8601	0.000184766	0.0098665
XR_001024572.2	0.340376	0	8.80321	0.000185429	0.00988564
TCONS_00146255	0.320698	0	8.74808	0.000188876	0.0100316
TCONS_00161086	1.70214	0.0433442	5.27413	0.000190733	0.0101068
TCONS_00252671	0.048048	2.7299	-5.86302	0.000195051	0.0102645
XR_001433899.1	0	0.0945067	-12.6445	0.000195877	0.0102923
TCONS_00170286	0	0.171294	-10.3882	0.000200343	0.0104236
TCONS_00047538	0.00757967	1.65398	-7.45706	0.000201785	0.010467
TCONS_00027883	0.330223	12.3129	-5.12786	0.000211815	0.0108889
TCONS_00103460	0.002806	0.642585	-7.69032	0.000215597	0.0110503
XR_001025416.2	0	1.52213	-8.83081	0.000216139	0.0110534
TCONS_00116654	0	0.226612	-8.8811	0.000217433	0.0110949
XR_001041650.2	0.0196762	0	6.82222	0.00022247	0.0112684
TCONS_00227802	0.206828	0	10.6978	0.000224069	0.0113245
TCONS_00034389	21.2893	163.299	-2.91325	0.000229675	0.01154
TCONS_00204991	0.163159	0	10.531	0.000230615	0.011562
TCONS_00053879	0	0.560403	-12.3668	0.000232308	0.0116215
TCONS_00134316	0.202854	7.72367	-5.15836	0.00024846	0.0122779
TCONS_00224975	0.525899	0.00311083	7.34971	0.000255173	0.0125199
TCONS_00012503	0	0.397969	-9.00853	0.000265851	0.0129332
TCONS_00049551	2.86329	0.169442	4.20658	0.000270528	0.0130774
TCONS_00053782	0	0.460654	-8.66396	0.000272455	0.0131391
TCONS_00031045	0.497204	0	10.2895	0.00027565	0.0132601
TCONS_00141931	0	0.204865	-7.40904	0.000281973	0.0134795
TCONS_00255144	0	0.234738	-8.10118	0.000288276	0.0136764
TCONS_00243040	0.261175	0	10.3243	0.00029905	0.0139657
XR_001033213.1	0	0.080785	-8.68388	0.000308613	0.0142774
TCONS_00065221	0.161917	0	9.03961	0.000313829	0.0144567
TCONS_00007271	0	0.112212	-12.0588	0.000313957	0.0144567
TCONS_00186089	0.193967	0	12.2558	0.000316137	0.0144989
XR_001435006.1	0	0.282319	-12.0365	0.000322916	0.0147607
TCONS_00012949	0.187534	0	9.00816	0.000329438	0.015019
TCONS_00223143	0	0.174137	-10.1097	0.000346254	0.0155388
TCONS_00036874	0	0.129628	-10.4222	0.000348627	0.015614
TCONS_00242102	0.633697	0	10.3547	0.000348836	0.015614
XR_001434393.1	0	0.0157585	-9.24372	0.000349807	0.015627
TCONS_00167623	0.169612	0	8.61575	0.000351414	0.0156768
TCONS_00194046	0.373852	0	10.361	0.000364516	0.0161272
TCONS_00049772	0.437848	0	10.7545	0.000370442	0.0162952
XR_001039990.1	0.282357	0	8.14333	0.000370784	0.0162998
TCONS_00128870	0.399679	0.000684667	9.23594	0.000376666	0.0164952
TCONS_00170550	0.189756	0.000424	8.10829	0.000378875	0.0165289
TCONS_00031280	0	0.134434	-10.0059	0.00038026	0.0165622
TCONS_00194213	0.147729	0	10.7622	0.000380358	0.0165622
XR_001021720.2	0.163824	0	10.1791	0.000382765	0.016625
TCONS_00149344	0	0.217721	-12.2602	0.000382766	0.016625
TCONS_00147790	0.290784	0	9.24917	0.000384285	0.0166594
TCONS_00040529	0.246989	0	7.96889	0.00038962	0.0168377
TCONS_00160470	0	0.381452	-10.1824	0.000393574	0.0169661
TCONS_00045075	9.35424	1.44652	2.81613	0.000397932	0.0171313
TCONS_00206799	0	0.243907	-9.96549	0.000398153	0.0171313
TCONS_00201909	0	0.243019	-10.0728	0.000399224	0.0171559
XR_001436905.1	0	0.0190513	-10.9339	0.000401393	0.0172384
TCONS_00226675	0.13472	0	10.2649	0.000403234	0.0172636
TCONS_00204015	0	0.159974	-8.03468	0.000409502	0.0174786
TCONS_00005975	0.182105	0	8.32491	0.00041541	0.0176207
TCONS_00016144	0	0.130048	-11.9042	0.000423994	0.0178966
TCONS_00028409	0.237702	0	7.93736	0.000424817	0.0179055
TCONS_00038012	3.68903	0	16.6916	0.000433404	0.0181052
TCONS_00151889	0.178462	0	8.27224	0.000434795	0.0181523
TCONS_00024302	0	0.285019	-10.0517	0.000435365	0.0181629
XR_001022286.1	0	0.0426937	-7.99142	0.000440438	0.0183213
TCONS_00199491	0	0.145117	-11.9808	0.000446604	0.0185442
TCONS_00013906	0.0098535	1.25065	-6.93976	0.000447478	0.0185693
TCONS_00079269	0.0014545	0.243942	-6.58932	0.000448666	0.0186073
TCONS_00159204	0.642367	0	14.3098	0.000450769	0.0186461
XR_001433716.1	0.023975	0	6.55627	0.000451048	0.0186461
TCONS_00098787	0	0.422131	-10.5148	0.000456263	0.0187979
TCONS_00145625	0	0.214444	-12.2148	0.000460093	0.0188879
TCONS_00106728	0	0.176948	-12.0538	0.000464591	0.0189932
TCONS_00021614	0.455983	0	8.01009	0.000469442	0.0191236
TCONS_00072719	0.159706	0	12.6107	0.000470165	0.0191417
XR_001435678.1	0	0.0523107	-11.5708	0.000480956	0.0194889
XR_001435132.1	0	0.160736	-9.61483	0.00048726	0.019698
TCONS_00061497	0	0.302382	-11.4928	0.000508307	0.0202517
TCONS_00071892	0	0.109372	-10.5376	0.000514471	0.0203912
TCONS_00101957	0.101631	0	12.5441	0.000524351	0.0206994
TCONS_00072720	0.185633	0	9.77118	0.00052531	0.0207195
TCONS_00097350	0	0.161505	-8.56824	0.000525461	0.0207195
TCONS_00161555	0.620556	0	12.1027	0.000534532	0.0209647
TCONS_00128093	0	0.16421	-9.79878	0.000539291	0.0210838
TCONS_00202268	4.54436	0.0128822	8.54575	0.00054631	0.0213098
TCONS_00008999	1.56636	0.014202	6.85462	0.00055503	0.0215523
TCONS_00115815	0.125311	0	9.71328	0.000589637	0.0225292
TCONS_00184441	0.563876	0	8.73101	0.000589851	0.0225292
TCONS_00213763	0	0.144813	-11.7929	0.000594498	0.0226633
TCONS_00253040	2.40096	0.0459233	5.70367	0.000595971	0.0227069
TCONS_00192352	0.911365	0	16.064	0.000597738	0.0227616
XR_001042841.2	0.036123	0	9.64143	0.000609434	0.0230667
TCONS_00043860	0	0.181545	-9.24957	0.000615592	0.0232105
TCONS_00091411	0.665622	0	9.51619	0.000638537	0.0238537
TCONS_00234773	0.181918	0	7.96183	0.000648651	0.0241502
TCONS_00009007	0	0.255938	-11.2431	0.000648927	0.0241502
TCONS_00254607	0	0.437638	-9.3543	0.000652352	0.0242514
TCONS_00180590	0	0.429632	-11.6408	0.000662834	0.0245497
TCONS_00147054	0.538616	0	9.72194	0.00066546	0.024611
TCONS_00161364	0.148377	0	7.59351	0.000670161	0.0247267
TCONS_00197981	2.13216	0.0655302	5.13263	0.000673982	0.0247898
TCONS_00122525	0	0.112188	-11.1885	0.000678029	0.0249236
TCONS_00098645	0.192635	0	10.1203	0.000683929	0.0250722
TCONS_00137797	2.57061	0.221391	3.69115	0.000684024	0.0250722
TCONS_00072302	0	0.174676	-13.3781	0.000686572	0.0251169
XR_001029287.2	0	0.0391643	-9.64683	0.000692896	0.0252411
TCONS_00238777	0	0.11078	-11.7341	0.000705727	0.0256002
TCONS_00020803	0.16415	0	11.3864	0.000709498	0.0256829
TCONS_00131152	0	0.18263	-9.27608	0.0007122	0.0257401
XR_001043118.2	0	0.204611	-11.3546	0.000714322	0.0258033
TCONS_00081859	0.537122	0	10.4064	0.000719539	0.0259373
TCONS_00218341	3.16198	0.0401245	6.39699	0.000720531	0.0259595
TCONS_00032155	0	0.230939	-6.48803	0.000725783	0.0261035
TCONS_00083585	0	0.134082	-9.5509	0.000726044	0.0261035
TCONS_00227814	0.516455	0.00286667	7.54762	0.000737073	0.0264035
TCONS_00015248	0.345114	0	9.419	0.000739348	0.0264713
TCONS_00000545	0	0.380614	-7.98297	0.000749765	0.026751
TCONS_00243941	0	0.087244	-11.3286	0.000757904	0.0269396
TCONS_00031044	0.390919	0.00855667	5.48523	0.00076019	0.026993
TCONS_00031047	0.455729	0.0172463	4.60023	0.000771134	0.0272552
TCONS_00020020	0.197307	0	9.98619	0.000773769	0.0273063
TCONS_00177964	0.688303	0	10.0863	0.000780619	0.0274496
TCONS_00178819	0	0.120062	-11.2594	0.000807722	0.0281483
TCONS_00153570	0.313235	0	9.21553	0.000809944	0.0281787
TCONS_00012907	0	0.271975	-7.34652	0.000813613	0.0282493
TCONS_00183901	0.337485	0	11.1127	0.000820997	0.0284617
XR_001435139.1	0	0.0139142	-7.63865	0.000824227	0.0285134
TCONS_00042018	0.276187	4.71166	-4.10158	0.000827273	0.0285686
TCONS_00035331	0.197159	0	11.1108	0.000840579	0.0288799
TCONS_00112722	0.256756	0	11.123	0.000841192	0.0288865
TCONS_00132110	0.0274325	0.895948	-4.74941	0.000847079	0.0290742
TCONS_00013907	0.0010715	0.736987	-9.65371	0.000854815	0.0292377
TCONS_00251310	0	0.18629	-10.869	0.000855744	0.029255
TCONS_00152095	0.574946	0	11.2042	0.000865267	0.0294781
TCONS_00183620	0.0064485	0.633357	-6.82054	0.000877374	0.0298169
TCONS_00247421	0.29948	0	12.0349	0.000899905	0.0303282
TCONS_00227819	0.129399	0	9.14909	0.000909026	0.0305608
TCONS_00019778	0	0.178276	-10.7523	0.000928954	0.0311245
TCONS_00057756	0	0.229518	-9.12549	0.000931278	0.031172
TCONS_00069588	0.226925	11.9951	-5.54963	0.000932696	0.0311892
TCONS_00183974	0.402023	0	9.00457	0.000948829	0.031476
TCONS_00182918	0	0.191815	-7.95807	0.000962081	0.0317708
TCONS_00119739	0.00674433	0.402659	-5.49253	0.000975399	0.0320875
TCONS_00166513	0.730226	0	15.2193	0.000986918	0.0323891
TCONS_00102612	0	0.0864682	-11.0868	0.000990084	0.0324527
TCONS_00212716	0.141678	0	13.2949	0.000990624	0.0324527
TCONS_00107800	0.192836	0	10.9619	0.000990908	0.0324527
TCONS_00192329	0.745139	0	11.5865	0.00100067	0.0327004
TCONS_00070375	0.26703	0	8.99465	0.00100601	0.0328057
TCONS_00138090	0.191787	0	8.06268	0.00101506	0.0329985
XR_001435745.1	0.448493	0	9.13155	0.00102736	0.0332936
TCONS_00001765	0.120409	0	10.8404	0.00104071	0.0335831
TCONS_00223469	7.12041	0.342792	4.40815	0.00104481	0.0336829
TCONS_00119754	0	0.149571	-11.8014	0.00105117	0.0338148
TCONS_00149227	0	0.217428	-8.8806	0.00105448	0.0338848
TCONS_00138634	0.222795	0	9.04761	0.00105675	0.0339213
TCONS_00258201	0.292282	0	7.70301	0.00106358	0.0340871
TCONS_00120565	0.0043775	1.85542	-8.17166	0.00108377	0.0345736
TCONS_00070676	0.118877	0	9.1041	0.00109967	0.0348853
TCONS_00242476	0	0.164871	-10.724	0.00111382	0.0351957
TCONS_00102287	1.30129	0	12.8301	0.00111688	0.0352437
TCONS_00072718	0.198935	0	6.95486	0.00112488	0.0354639
TCONS_00181461	0	0.0882733	-10.5731	0.0011354	0.0357136
XR_001434495.1	0.105677	0	13.2972	0.00115942	0.0363364
TCONS_00235918	0	0.246828	-8.90196	0.00117569	0.0366072
XR_001434416.1	1.65518	0.0664702	4.73183	0.00119578	0.037038
TCONS_00165761	0.266583	0	8.83645	0.00121224	0.0374132
TCONS_00231594	0	0.195733	-11.1749	0.00122213	0.0375932
XR_001045113.2	0	0.101756	-10.4369	0.00122916	0.0377324
TCONS_00146794	18.7016	0	14.9182	0.00124088	0.0380502
TCONS_00087309	0.176302	0	8.30303	0.00124116	0.0380502
TCONS_00121294	2.5971	0.0189643	7.27099	0.00124746	0.0381584
TCONS_00133875	1.48512	8.66066	-2.54156	0.00126486	0.0385783
TCONS_00240045	0	0.167024	-9.13039	0.00126623	0.0385783
TCONS_00036174	0	0.0663303	-12.9724	0.00127446	0.0387605
TCONS_00167458	0.108644	0	12.8159	0.00128215	0.0389084
TCONS_00232181	1.46981	0.0503868	5.0474	0.00129053	0.0390673
TCONS_00096050	0.327006	0	10.6025	0.00129728	0.0392295
TCONS_00170583	0	0.11193	-10.3536	0.0012986	0.0392333
TCONS_00146078	0.0912208	0	12.6183	0.00131022	0.0394646
TCONS_00183813	0.195189	0	11.3186	0.00132358	0.0396922
TCONS_00185866	0.126323	0	12.7909	0.00133299	0.0398545
TCONS_00120380	0.101121	0	8.8797	0.00135891	0.0404444
XR_001434069.1	0	0.022579	-7.18195	0.00138184	0.0409272
TCONS_00177227	0.219546	0	8.93655	0.00139139	0.041154
XR_001025038.2	0.0462595	0	10.8299	0.00141156	0.0415719
TCONS_00116182	0.255509	0	8.59666	0.00141861	0.0416017
TCONS_00142908	0.146616	0	8.55746	0.00142625	0.0417548
TCONS_00236912	0	0.950528	-14.533	0.00143524	0.0419288
TCONS_00001653	0	0.164594	-11.084	0.00144196	0.0420676
TCONS_00140335	11.2613	1.9261	2.53841	0.0014827	0.0428555
TCONS_00135820	0	0.140845	-10.5936	0.00148497	0.0428905
TCONS_00136500	0	1.21307	-10.2052	0.00149379	0.043073
TCONS_00045725	0.850241	0.005624	6.8266	0.00150201	0.0432374
TCONS_00147789	0.369098	0.00437517	6.14406	0.00152471	0.0436901
TCONS_00019017	0	0.0989953	-12.372	0.00153274	0.0438474
TCONS_00243307	0.132137	0	10.4886	0.00154522	0.0441861
TCONS_00115504	0	0.0769927	-12.5898	0.00157488	0.0447738
TCONS_00173994	0	0.112619	-10.444	0.00158236	0.0448596
TCONS_00214778	0	0.318459	-10.1213	0.00158358	0.0448596
TCONS_00098789	0	0.114876	-7.22031	0.00160138	0.0451915
TCONS_00121350	0	0.291542	-10.0558	0.00160689	0.0453098
TCONS_00187161	0.961383	0	10.6649	0.00163683	0.0459287
XR_001022356.2	47.7661	1.03952	5.44709	0.00166241	0.046476
TCONS_00136504	0	1.12323	-10.0549	0.0016909	0.0469863
XR_001434015.1	16.3927	1.35387	3.67203	0.00170019	0.0471494
TCONS_00066657	0.120677	0	10.557	0.00171357	0.0474252
TCONS_00229269	4.83333e-06	0.180326	-12.2668	0.00173123	0.0477412
TCONS_00151653	0.283858	0	10.3373	0.001756	0.0482311
TCONS_00046849	0.0553415	0.951842	-4.06378	0.00176905	0.0484929
XR_001434582.1	0.280728	0	10.1257	0.00177257	0.0485502
TCONS_00029855	0.106083	0	10.2866	0.00177349	0.0485502
TCONS_00222605	0.984324	0.0644767	3.96681	0.00177605	0.0485688
TCONS_00031761	0.00368517	0.231131	-6.02883	0.001792	0.0487534
TCONS_00149226	0	0.170918	-6.80486	0.00179373	0.0487673
XR_001436831.1	0	0.0369862	-12.0641	0.00179393	0.0487673
TCONS_00205268	0.0895183	0	10.1665	0.00179614	0.0488018
TCONS_00224455	0.0838095	0	10.3677	0.00182835	0.0494883
TCONS_00211671	0.116502	0	10.5374	0.00183152	0.0495547
TCONS_00100415	0	0.136372	-12.431	0.00183604	0.049638
TCONS_00053700	0.171617	0	8.67601	0.00184595	0.0498183
TCONS_00096624	0.114645	0	10.4635	0.00187086	0.0503029
TCONS_00213836	0.342458	0.00480983	6.12961	0.00191884	0.051134
TCONS_00140247	0.192699	0	8.35977	0.00192017	0.0511496
TCONS_00214395	0.813128	0	14.3508	0.00192335	0.0512146
XR_001436977.1	0	0.289959	-10.1105	0.00195455	0.0518648
TCONS_00013908	0.224829	0	12.1933	0.00196319	0.0520539
TCONS_00136972	32.7756	155.104	-2.27674	0.00196702	0.0521356
TCONS_00203560	0	0.111198	-11.9135	0.00197279	0.0522472
TCONS_00183105	0	0.229603	-12.2387	0.00200251	0.0528119
TCONS_00215883	0	0.222787	-9.83275	0.00205589	0.0538486
TCONS_00254598	15.1509	0.519999	4.76865	0.00207159	0.0541976
TCONS_00172120	0.0750185	0	12.0351	0.00207796	0.0543235
TCONS_00003691	0.178474	0	6.58939	0.00209253	0.0546215
TCONS_00109557	0.161446	0	9.96338	0.00209982	0.0546874
TCONS_00086179	0	0.122223	-12.2062	0.00210168	0.0547153
TCONS_00180856	0	0.0831158	-9.9213	0.00210674	0.0547899
XR_001032992.1	0.0194952	0	8.76358	0.00212322	0.0551717
TCONS_00001480	0	0.120038	-7.04357	0.00213588	0.0553695
TCONS_00014306	0	0.129126	-9.87179	0.00215254	0.0557023
XR_001433841.1	0	0.00961983	-6.34882	0.00216027	0.0558395
XR_001434296.1	0	0.144764	-7.88128	0.00216157	0.0558522
XR_001025218.2	0	0.3343	-12.1317	0.00217869	0.0560967
TCONS_00083057	0.0176812	0.944033	-5.21303	0.00221878	0.0567736
TCONS_00141944	0	0.317068	-11.7589	0.00222468	0.0568855
TCONS_00157065	0	0.102756	-12.0915	0.00222807	0.0569509
TCONS_00079272	0	0.266485	-8.02911	0.00223288	0.0570165
TCONS_00029734	0.654139	0.00386833	6.62801	0.00223312	0.0570165
TCONS_00131060	0.541241	0.00590633	6.5819	0.00224454	0.0572444
TCONS_00157002	0.117776	0	8.10595	0.00224755	0.0573001
TCONS_00103979	0	0.116819	-9.93068	0.00225654	0.0574811
TCONS_00131232	0	0.243058	-7.88062	0.00226528	0.0576161
XR_001436441.1	0.0189158	0	8.22693	0.0022658	0.0576161
TCONS_00161090	0.797096	0.0501198	4.01017	0.00228357	0.0579231
TCONS_00047259	0	0.280553	-12.0503	0.00229844	0.0581669
TCONS_00220061	0.0941337	0	11.8437	0.00230156	0.0582032
TCONS_00257456	0.177289	0	8.06479	0.00232595	0.0585834
TCONS_00030620	0	0.14825	-9.62303	0.00234537	0.0588888
TCONS_00137801	8.03935	0.35277	4.58788	0.00234645	0.0588888
TCONS_00047033	0	0.214621	-9.83472	0.00234799	0.0589016
TCONS_00044884	0.00867267	0.5492	-5.80168	0.00235936	0.0590401
XR_001434417.1	2.45524	0.065969	5.29361	0.00236827	0.0591946
XR_001436834.1	0.0609053	0	11.8882	0.00238522	0.0594672
TCONS_00218148	0.384827	0	8.55338	0.00241938	0.0601015
TCONS_00207058	3.71034	0	13.9464	0.0024361	0.060408
TCONS_00239682	0	0.311535	-8.32357	0.00244023	0.0604292
TCONS_00130289	0.284196	0	11.8464	0.0024432	0.060475
TCONS_00231140	0.205005	0	10.1259	0.00248821	0.0613248
TCONS_00193646	0.589287	0.00955733	6.06916	0.00248971	0.0613398
TCONS_00031771	0.0386338	0.551839	-3.8395	0.00251495	0.0618182
TCONS_00255702	0	0.0967173	-9.79263	0.00251664	0.0618182
TCONS_00215243	0.535807	0.00725283	6.15253	0.00252877	0.062058
TCONS_00047799	0	0.262567	-7.91796	0.00254112	0.0622723
TCONS_00108889	0.0807305	0	11.8116	0.00255281	0.0625143
TCONS_00014857	0	0.176855	-9.49644	0.00256334	0.0625942
TCONS_00083242	0	0.150751	-9.89711	0.00256977	0.0626625
TCONS_00198770	0.186792	0	8.08141	0.00258443	0.0629529
TCONS_00013111	0.117918	4.94451	-5.29849	0.00258944	0.0630527
TCONS_00245458	0.0868368	0	11.697	0.00264203	0.0639531
TCONS_00045282	0.108168	0	11.9442	0.0026453	0.0639642
TCONS_00202168	0	0.454679	-8.28144	0.00264718	0.0639642
XR_001435232.1	0	0.0558288	-11.4598	0.00265038	0.0639937
TCONS_00193181	0	0.0909232	-7.91403	0.00265206	0.0640118
TCONS_00222937	53.0072	9.02143	2.54726	0.00268124	0.0644678
TCONS_00184056	1.7733	0.0657922	4.89607	0.00270393	0.0647421
TCONS_00224976	2.42061	0.468927	2.50436	0.00271098	0.0647983
TCONS_00227622	1.73761	0.137105	3.75497	0.00271224	0.0648059
TCONS_00234310	0.0889563	0	9.65533	0.00272551	0.0649996
TCONS_00165524	0	0.127399	-9.63677	0.00272695	0.0649996
TCONS_00001472	0.00451567	0.437439	-6.4675	0.00275696	0.0653981
TCONS_00193691	0	0.136146	-11.3912	0.00280774	0.0661244
TCONS_00032375	0.402925	0	9.58688	0.00281659	0.0663101
TCONS_00229245	0.122968	0	11.7393	0.00282314	0.0663624
TCONS_00193283	0	0.197406	-9.66914	0.00284483	0.0667469
TCONS_00100578	0	0.129075	-10.009	0.00285433	0.0669014
XR_001022322.2	0.00185217	0.159978	-6.26264	0.00287137	0.067141
TCONS_00094553	0	0.148479	-11.7168	0.00287663	0.0671778
TCONS_00138854	0.221664	0	11.8438	0.00290851	0.0675279
TCONS_00006175	0.141116	0	9.74095	0.00292643	0.0677159
TCONS_00042027	0	0.430685	-8.12369	0.00292827	0.0677276
XR_001434514.1	0.0328522	0	9.52027	0.00294284	0.0679587
TCONS_00063293	0.0389255	2.24076	-5.79888	0.00298637	0.0687793
TCONS_00141952	0	0.090446	-9.28993	0.00299868	0.0689247
TCONS_00209885	0.221177	0	6.3219	0.00303823	0.0694746
XR_001037478.2	0.0513332	0.0007095	5.98291	0.00304286	0.0695456
TCONS_00168883	0.00640233	0.330247	-5.50696	0.00304762	0.0695869
TCONS_00077896	0.00168283	0.189755	-6.88315	0.00306723	0.0698653
TCONS_00168894	0.180753	0	9.56301	0.0030816	0.0700822
TCONS_00122805	0	0.163873	-11.2309	0.00311585	0.0707211
TCONS_00212717	0.178589	0	13.6078	0.00312458	0.070826
TCONS_00047179	0.282046	0	8.05362	0.00312916	0.0708831
XR_001026205.2	0	0.0810935	-10.0547	0.00315868	0.0713835
TCONS_00039297	0.100626	0	11.4418	0.0031881	0.0718872
TCONS_00153244	1.13221	0.103541	3.48104	0.00321211	0.0722535
TCONS_00192532	0	0.269881	-6.35718	0.00321766	0.072329
TCONS_00116110	0	0.232164	-9.33437	0.00321819	0.072329
XR_001435264.1	0.127676	0	9.57724	0.00323328	0.0725634
TCONS_00119981	0.155548	0	11.7257	0.00323425	0.0725634
XR_001436432.1	0.0724642	0	13.4921	0.00325102	0.072796
TCONS_00236810	0	0.100979	-11.1686	0.00329649	0.0736323
TCONS_00134900	0	0.171842	-7.44138	0.00331429	0.073934
TCONS_00030362	0	0.155578	-12.2248	0.00333293	0.0741576
TCONS_00239853	0	0.200907	-8.23243	0.00333649	0.0741889
TCONS_00025673	0	0.124569	-13.649	0.00334778	0.0743515
TCONS_00000707	0.166668	0	9.33631	0.00335361	0.0744495
XR_001435861.1	0.0093755	0	9.32902	0.00335759	0.074484
TCONS_00258202	0.37214	0	7.93087	0.0033616	0.074484
TCONS_00221886	0	0.131104	-11.1465	0.00339091	0.0749154
TCONS_00198824	0.208235	0.00185933	6.66206	0.00339611	0.0750062
XR_001435696.1	0	0.0148958	-11.0488	0.00340023	0.0750732
XR_001435857.1	0	0.125792	-9.11879	0.00342616	0.075573
TCONS_00007368	0	0.384056	-9.11731	0.00346645	0.0761934
TCONS_00225280	0	0.168463	-11.2029	0.00349039	0.076489
TCONS_00205954	0.993787	0	11.4337	0.00349049	0.076489
TCONS_00235990	0	0.2644	-7.59062	0.00354714	0.0772797
TCONS_00072779	0.504139	0	8.64745	0.00356112	0.0774172
TCONS_00242236	0.450664	0	9.2439	0.00356672	0.0774671
TCONS_00072147	0.326371	0.00397667	6.40129	0.00356713	0.0774671
TCONS_00142403	0	0.365921	-6.20593	0.00357045	0.0774903
TCONS_00055370	0.0762112	0	11.2905	0.00360418	0.077989
TCONS_00202269	0.764904	0.00542783	7.23988	0.00360475	0.077989
TCONS_00071167	0.201056	0	7.55545	0.00362193	0.0781323
XR_001434147.1	0	0.124493	-9.17058	0.00364564	0.0783977
XR_001434755.1	0	0.00956483	-10.9644	0.00369622	0.0791229
TCONS_00139222	0	0.180861	-6.03198	0.00369855	0.0791237
TCONS_00019431	0.105722	0	11.1256	0.00372701	0.079482
TCONS_00087709	0.0972602	0	11.3726	0.00374453	0.0797112
TCONS_00078970	0.190512	0	11.1033	0.00377422	0.0800021
TCONS_00022210	0	0.102436	-9.21187	0.00377445	0.0800021
TCONS_00044007	0.226928	0	13.2384	0.00380614	0.0802996
TCONS_00152147	0.094991	0	11.2595	0.00387527	0.0813094
TCONS_00226036	0.200506	0	6.07559	0.00387626	0.0813094
XR_001040941.2	0.000240167	0.0253313	-6.52383	0.0039147	0.0818795
TCONS_00215265	0	0.303312	-8.97935	0.00392074	0.0819429
XR_001024771.1	0.033793	0	11.0834	0.00393204	0.0820796
TCONS_00240287	0.0884463	0	11.3278	0.00395013	0.0823325
TCONS_00160541	0.12075	0	11.191	0.00396939	0.0826338
TCONS_00022112	0.12078	0	9.2947	0.0040028	0.0830661
TCONS_00000434	3.82579	0.711356	2.45475	0.00400395	0.0830661
TCONS_00250666	0.0942153	0	11.0943	0.00402405	0.0833436
TCONS_00040259	0	0.074301	-11.205	0.00403645	0.0835345
XR_001024742.2	0.374061	7.7309	-4.51411	0.00410775	0.0845433
TCONS_00089617	0	0.15126	-9.07468	0.00412179	0.0847141
TCONS_00126475	0	0.120178	-12.9092	0.0041222	0.0847141
TCONS_00154084	0	0.274418	-8.90098	0.00412881	0.0847741
TCONS_00047180	0.155257	0	7.73008	0.00414063	0.0849543
TCONS_00047371	0	0.135224	-7.52368	0.0041524	0.0851213
TCONS_00121245	0.166923	0	9.25954	0.00415361	0.0851213
TCONS_00121291	0.522328	0.0163018	5.05279	0.00416733	0.0852347
TCONS_00007778	0.171649	0	5.90493	0.00418835	0.0856138
TCONS_00152762	0	0.192853	-13.2959	0.00419334	0.0856903
TCONS_00142713	4.49184	0.406282	3.50763	0.00421675	0.0860324
TCONS_00001495	0	0.159907	-9.31911	0.00423134	0.0862368
TCONS_00094596	0.25934	0	11.3283	0.00424674	0.0864275
TCONS_00211681	0	1.66565	-12.8484	0.00426478	0.0867167
TCONS_00109477	0.589711	0	13.0462	0.00426643	0.086721
TCONS_00046264	0.212156	0	6.09681	0.00431432	0.0873096
TCONS_00235310	0	0.468122	-7.18473	0.00433302	0.0875648
TCONS_00045847	0	0.301549	-13.243	0.00433336	0.0875648
TCONS_00202468	0	0.121763	-7.1314	0.00433903	0.0876142
TCONS_00040309	0	0.216824	-7.38959	0.00437607	0.0880716
TCONS_00036864	0.0459268	0.712615	-3.87903	0.00438237	0.0881142
TCONS_00079751	0.127495	0	6.41999	0.00438644	0.0881408
XR_001025089.2	4.00549	0.397886	3.37959	0.00439656	0.0882978
XR_001434094.1	0	0.0636965	-11.164	0.00442937	0.0888272
TCONS_00099666	0.080631	0	10.995	0.00444039	0.0889446
TCONS_00190904	0	0.0762235	-8.87714	0.00445462	0.089056
TCONS_00069445	0	0.546491	-12.7795	0.004455	0.089056
XR_001040886.1	0	0.0386572	-7.22748	0.0045502	0.0903281
XR_001024604.1	0	0.0160118	-7.23191	0.00457328	0.0904934
TCONS_00101998	0.801615	0.0595633	3.67654	0.00460049	0.0908354
TCONS_00251591	0.230772	0.0021095	6.9352	0.00460177	0.0908354
TCONS_00141942	0.00121683	0.238616	-7.23333	0.00461605	0.0909818
XR_001435740.1	0.165103	0.00485717	4.82428	0.00462734	0.0911521
TCONS_00248127	0	0.112956	-8.88897	0.00466437	0.0915455
TCONS_00009006	0.0242148	1.69914	-6.17473	0.00466592	0.0915455
XR_001436842.1	0	0.0634975	-11.8547	0.00467649	0.0916611
TCONS_00255295	0.165004	0	5.86739	0.00473597	0.0924984
TCONS_00073663	0	0.0844913	-12.6749	0.00477467	0.0930778
TCONS_00026638	0.109112	0	6.13156	0.00478206	0.0931609
XR_001435669.1	0.009514	0.406083	-5.44498	0.00479347	0.093264
TCONS_00001417	2.63713	0.288406	3.26262	0.00479381	0.093264
TCONS_00067893	0.0443315	0	10.3145	0.00479914	0.0933315
TCONS_00073588	0.1148	0	12.8297	0.00481564	0.0935504
TCONS_00183900	0.291678	0.005878	5.63171	0.00482681	0.0936106
XR_001024207.1	0	0.130167	-8.92719	0.00482994	0.0936106
TCONS_00040892	0.14089	0	7.07517	0.00483052	0.0936106
XR_001436087.1	0	0.0569483	-7.91374	0.00483096	0.0936106
TCONS_00182252	0.295578	0	10.8353	0.00483305	0.0936248
XR_001436832.1	0	0.0160822	-10.613	0.00485717	0.0938648
TCONS_00256246	0	0.33806	-10.5568	0.00488822	0.0942957
TCONS_00132982	0.240236	0	10.7815	0.00489105	0.0943051
TCONS_00218357	0	0.213957	-9.12987	0.00490425	0.0944289
XR_001028674.2	0	0.0641508	-10.4946	0.00492849	0.0947131
TCONS_00034101	0	0.0963192	-10.8352	0.00495188	0.0949656
TCONS_00079456	0	0.0735112	-12.5908	0.00498825	0.095356
TCONS_00225729	0	0.152694	-8.93417	0.00500973	0.0956392
TCONS_00133396	0.273284	0	7.27068	0.00503001	0.0958817
TCONS_00214941	0	0.295393	-7.07575	0.00503696	0.0959823
TCONS_00201910	0	0.163454	-7.77265	0.00507285	0.0963198
TCONS_00183976	0.062696	0	12.7268	0.00508862	0.0965128
TCONS_00135695	0	0.134226	-8.62529	0.00510553	0.0967271
TCONS_00028645	0.129717	0	10.7629	0.00511402	0.0968151
TCONS_00034653	0	0.108963	-8.68782	0.00513128	0.0970498
TCONS_00204340	0	0.0871382	-8.66567	0.00516429	0.0974918
TCONS_00168840	0.117052	0	10.7335	0.00519916	0.097962
XR_001434242.1	0	0.421433	-10.3859	0.00521989	0.098181
TCONS_00136292	0.214311	0	10.8659	0.0052247	0.0982015
XR_001436304.1	0	0.0779978	-10.7786	0.00526642	0.0986667
XR_001436601.1	0.087375	0	10.6419	0.00532851	0.0995011
TCONS_00078880	0.0968302	0	10.6733	0.00536485	0.100044
TCONS_00238136	0	0.0985458	-10.8764	0.00537598	0.100116
TCONS_00257457	0.128114	0	7.6749	0.00542629	0.100835
TCONS_00121648	0.0925235	0	10.5956	0.0054325	0.100901
TCONS_00227801	0.172154	0	8.71714	0.00543275	0.100901
TCONS_00043539	1.59941	0	12.7135	0.00545792	0.101305
XR_001436772.1	0.0904305	0	8.86819	0.00546163	0.101308
TCONS_00125234	0.169944	0	10.6104	0.00549229	0.10165
XR_001044635.1	0	0.0579352	-7.91369	0.00550244	0.101783
TCONS_00064255	0	0.359679	-9.17809	0.00553265	0.102095
TCONS_00240054	0	0.074615	-12.8182	0.00555997	0.102441
TCONS_00009174	0.185214	0	12.604	0.00556534	0.102481
TCONS_00095103	0	0.0783637	-12.4097	0.00557984	0.102633
XR_001434530.1	0	0.0999557	-8.50261	0.00558264	0.102633
XR_001435860.1	0.0231518	0	10.4969	0.00560537	0.102803
TCONS_00021680	0.002062	0.394522	-6.84256	0.00563292	0.10309
TCONS_00076591	0.172412	0	9.06106	0.0056597	0.103387
TCONS_00253342	1.16079	0	10.5967	0.00567811	0.103664
TCONS_00026145	0	0.261524	-10.2695	0.00569827	0.103954
TCONS_00110597	0.449664	0	6.8374	0.00570672	0.104019
TCONS_00144926	0.343639	0	10.4736	0.0057182	0.104158
TCONS_00047026	0.0321643	0.703964	-4.17338	0.00573764	0.104341
XR_001021348.2	0.513447	0.0379032	3.56157	0.00577929	0.104849
TCONS_00098109	0.0685172	0	12.598	0.00579901	0.105124
TCONS_00219036	0	0.11697	-10.2223	0.00580062	0.105125
XR_001020697.2	0.166319	2.55779	-3.79143	0.00581692	0.10524
XR_001434631.1	0	0.0354225	-5.75711	0.00585146	0.105649
TCONS_00242994	0	0.178037	-10.2078	0.00586437	0.105727
TCONS_00149036	0.133992	0	10.3948	0.00586453	0.105727
TCONS_00056558	0.290221	0	8.65961	0.00590386	0.106131
XR_001434818.1	0.0241673	0	6.92277	0.00593401	0.106471
TCONS_00026258	0	0.140029	-10.2888	0.00593458	0.106471
XR_001434973.1	0	0.0164322	-5.74077	0.00596929	0.106833
TCONS_00065455	7.15e-05	0.118819	-9.85444	0.0059864	0.107016
XR_001039182.2	0.0025715	0.27417	-6.27032	0.00598726	0.107016
TCONS_00108890	0	0.125858	-12.2601	0.00605193	0.107874
XR_001022037.1	0.00122333	0.033232	-4.28426	0.00607747	0.108174
TCONS_00023463	0	0.0937663	-10.2746	0.0060953	0.108356
TCONS_00250339	0.843493	0.0737068	3.56306	0.00610132	0.108432
XR_001435720.1	0	0.036327	-10.1474	0.00617274	0.109198
TCONS_00133746	0.181523	0	10.4617	0.00620871	0.109706
TCONS_00069443	0.353312	2.87789	-2.83924	0.00624906	0.110095
TCONS_00042809	0.607615	5.78101	-3.19427	0.00625543	0.110179
TCONS_00169144	0	0.149325	-12.6149	0.0062871	0.110596
XR_001435985.1	0	0.037047	-8.32583	0.00630045	0.110633
TCONS_00192954	0.281704	0	12.4682	0.00630243	0.11064
TCONS_00056534	0.660783	0.0836937	3.02582	0.00631782	0.110784
XR_001040946.2	0	0.0572755	-10.5746	0.00632187	0.110811
TCONS_00048123	0.111196	0	8.69221	0.00633964	0.110953
TCONS_00204013	0	0.244701	-8.88055	0.00637404	0.11147
TCONS_00161700	0	0.0703882	-12.1691	0.00639426	0.111739
TCONS_00024304	0.170417	0	12.3219	0.00646868	0.11254
TCONS_00010664	0.059716	1.06879	-4.07388	0.00649722	0.112937
TCONS_00163698	0.120655	0	8.60081	0.00651105	0.113021
TCONS_00174682	2.93977	0.289981	3.39128	0.0065116	0.113021
TCONS_00032269	0.339791	0	12.4231	0.00651194	0.113021
TCONS_00100212	0	0.135691	-10.0332	0.00654225	0.113309
TCONS_00209197	0.275564	0	12.3251	0.00656876	0.113622
TCONS_00182693	0.524234	0.0472867	3.33169	0.00658181	0.113798
TCONS_00094392	0.117808	0	12.3075	0.00659394	0.113956
TCONS_00147791	0.186731	0	8.43927	0.00661299	0.114171
TCONS_00124866	0.123727	0	8.44087	0.00667791	0.11509
TCONS_00222594	0.720707	0.0742667	3.35206	0.00671438	0.115603
TCONS_00232177	3.93219	0.384688	3.45941	0.00672753	0.115673
XR_001434500.1	0.0242867	0.000121833	7.47209	0.0067281	0.115673
TCONS_00011515	0	0.131337	-8.26379	0.00677394	0.116056
TCONS_00016048	0.0046915	0.313557	-5.16983	0.00680455	0.11637
TCONS_00222611	1.37434	0.121437	3.45867	0.00683405	0.116751
TCONS_00158817	0	0.114319	-8.53744	0.00684116	0.11679
XR_001435093.1	0	0.0757832	-8.25071	0.00684282	0.11679
TCONS_00071574	0.187454	0	10.1774	0.00685827	0.116869
TCONS_00013118	0.0969552	0	10.306	0.00689469	0.117155
TCONS_00182207	0.482378	0.0245207	4.13395	0.00689905	0.117199
TCONS_00043228	0.114877	0	12.2076	0.00690064	0.117199
TCONS_00231077	0.0344427	1.0508	-4.80145	0.00691771	0.117381
TCONS_00120382	0.001853	0.222107	-6.72961	0.00693411	0.117448
TCONS_00075331	0.0154543	0	12.2345	0.00694181	0.117506
TCONS_00088329	0	0.684288	-12.0184	0.00695094	0.117559
TCONS_00076624	0.185387	0	10.1691	0.00695304	0.117559
TCONS_00183390	0	0.245027	-5.80737	0.00700226	0.118167
TCONS_00148605	0.125088	0	8.47475	0.00701075	0.118281
TCONS_00104290	0	0.150612	-8.41436	0.00701331	0.118285
TCONS_00165366	0	0.0811262	-8.83666	0.00701439	0.118285
TCONS_00257471	0	0.156204	-9.93521	0.00703415	0.118444
TCONS_00035207	0.111752	0	10.0536	0.00707038	0.118842
TCONS_00218090	0.123493	0	8.34472	0.00707414	0.118856
TCONS_00085978	0.0936372	0	6.56447	0.00707815	0.118894
TCONS_00203547	0	0.0558163	-11.9799	0.00708688	0.118947
TCONS_00217455	0.465636	0	12.1588	0.00710021	0.11912
XR_001436484.1	0.133879	0	7.29572	0.00712305	0.119416
TCONS_00242550	0	0.190243	-8.69479	0.00717887	0.120014
TCONS_00011298	0.0694755	1.21339	-4.06989	0.00718871	0.120038
TCONS_00121647	0.268098	0	8.32104	0.00719912	0.120162
TCONS_00254557	0.424564	0.00551033	6.0042	0.00722082	0.12041
TCONS_00145087	0.0167898	0.391028	-4.45916	0.00732443	0.121461
TCONS_00152899	0.136846	0	8.54849	0.0073897	0.122103
TCONS_00046025	0	0.200568	-8.50017	0.00740904	0.122358
TCONS_00152096	0.67005	0.0258613	4.74828	0.00741119	0.122358
TCONS_00182787	0.266021	0	9.97964	0.00743013	0.122504
TCONS_00135816	0	0.106674	-8.0962	0.00743487	0.122504
TCONS_00157095	0.0976353	0	10.0163	0.00743533	0.122504
XR_001435779.1	2.87828	0.00478983	9.122	0.00744554	0.122551
XR_001434720.1	0	0.155458	-5.5175	0.00745562	0.122633
TCONS_00086006	0.979712	0.071907	3.91889	0.00749942	0.123094
XR_001435405.1	0	0.033277	-8.37899	0.00749975	0.123094
TCONS_00230812	0	0.290443	-8.26881	0.0075103	0.123172
XR_001434098.1	0	0.0386958	-10.4576	0.0075216	0.123277
TCONS_00188360	0	0.155519	-10.4689	0.00755819	0.123641
XR_001434533.1	0.012947	0	7.09464	0.00759578	0.123991
TCONS_00108316	0.434735	0	10.0307	0.00762422	0.124163
TCONS_00031344	0	0.126787	-9.86334	0.00764953	0.124374
TCONS_00051405	0.374027	0.0128903	4.29777	0.00766141	0.124449
TCONS_00009015	0	0.274037	-8.05502	0.0076856	0.124664
TCONS_00043251	0.613085	0.0127868	5.55204	0.00769729	0.124788
TCONS_00014759	0.31918	0	8.22616	0.00776351	0.125505
TCONS_00199492	0	0.0874443	-11.8247	0.0077672	0.125507
XR_001434380.1	0	0.0368845	-9.85135	0.00776881	0.125507
TCONS_00227167	0	0.178838	-8.52482	0.00785399	0.12635
TCONS_00092379	1.23485	7.82549	-2.57371	0.00786602	0.126484
TCONS_00134747	0.508402	0.0251463	4.27345	0.00787467	0.126594
TCONS_00208278	0	0.350356	-11.8	0.0078817	0.126622
TCONS_00159248	0.141934	0	8.30168	0.00791322	0.126829
TCONS_00179024	0.62634	0	11.984	0.00791787	0.126874
TCONS_00145885	0	0.0395557	-10.1395	0.00795771	0.127187
XR_001043929.1	0.209261	0	8.35205	0.00796472	0.127187
TCONS_00098988	0	0.189543	-6.64218	0.00797883	0.127347
XR_001434300.1	0	0.00546667	-9.77612	0.00799225	0.127443
TCONS_00119762	0	0.335588	-9.88187	0.00800424	0.127575
TCONS_00226513	0	0.152117	-9.82489	0.00807915	0.128353
TCONS_00092624	0.00791267	0	9.92808	0.00813676	0.128974
TCONS_00182298	0	0.136856	-9.68995	0.00813693	0.128974
TCONS_00030570	0	0.19903	-6.76644	0.00816181	0.12929
XR_001435447.1	0.0281097	0	9.89919	0.00819367	0.129635
TCONS_00030853	0.011334	0.302373	-4.49658	0.0082669	0.130314
TCONS_00200500	0	0.041394	-11.7016	0.00827795	0.130369
TCONS_00169915	0	0.452471	-11.6995	0.00828749	0.13046
TCONS_00105470	0.0682578	0	9.88041	0.0082875	0.13046
XR_001043460.2	0	0.00577133	-7.89022	0.00831365	0.130812
XR_001040948.2	0	0.0135773	-9.65221	0.00833723	0.130977
TCONS_00009476	2.84	0.233647	3.73536	0.0083487	0.131124
TCONS_00229954	0.15739	0.00139267	5.98667	0.00837614	0.131429
TCONS_00103429	0	0.0776483	-11.6757	0.00838908	0.131548
TCONS_00213209	0	0.153642	-5.74738	0.00842088	0.131826
TCONS_00015394	0	0.045462	-11.6617	0.00845746	0.132199
TCONS_00139121	0.294631	0.0285508	3.28625	0.00849537	0.132641
TCONS_00192381	3.09862	0.0521118	5.84731	0.00849976	0.132649
TCONS_00228078	0.0869203	0	8.28195	0.00852264	0.13293
TCONS_00239681	0	0.137684	-6.98415	0.00853065	0.132962
XR_001434502.1	0.0119052	0	9.89584	0.00859041	0.13367
TCONS_00008923	0.0733803	0	9.92076	0.0086093	0.133843
TCONS_00152599	0.0267897	0.455959	-3.82092	0.00865315	0.134252
TCONS_00182976	0.527184	0.0104905	5.42371	0.00866197	0.134359
TCONS_00049055	0	0.18028	-10.0481	0.00867983	0.134515
TCONS_00141422	0.142304	0	8.86619	0.00869112	0.134614
TCONS_00144994	0.173052	0	10.1685	0.0087102	0.134791
TCONS_00013104	0.011498	0.351305	-4.54746	0.00871207	0.134791
TCONS_00097757	0	0.151666	-6.18955	0.00876962	0.1354
TCONS_00256039	0.0168775	0.50205	-4.62513	0.00877015	0.1354
TCONS_00162593	0.568691	0	9.83758	0.00881587	0.135889
TCONS_00071540	0.264082	0	11.7952	0.00884113	0.136126
TCONS_00070421	0	0.11659	-6.61537	0.0088681	0.136413
TCONS_00065559	0.0883002	0	9.89152	0.00887856	0.13652
TCONS_00104225	0.276715	0	5.38811	0.00889298	0.13668
TCONS_00145091	0.0159812	0.879352	-5.57504	0.00890289	0.136802
XR_001435130.1	0.00619383	0.0554733	-3.12189	0.00894054	0.137241
TCONS_00026370	0.0164967	0.367926	-4.26647	0.00896275	0.137477
TCONS_00035050	0	0.149138	-9.88122	0.00896679	0.137508
TCONS_00135311	0.103884	0	9.77437	0.00910377	0.138798
TCONS_00147792	0.138303	0	7.90695	0.00916814	0.139293
TCONS_00198818	0	0.0824187	-9.52235	0.00918366	0.139442
XR_001021990.2	0	0.014607	-8.04932	0.0092006	0.139663
TCONS_00071723	0.002342	0.230019	-6.22027	0.00921277	0.139765
TCONS_00221545	0.02035	0.384043	-3.95735	0.00927116	0.140117
TCONS_00141961	0.0019645	0.595216	-6.5974	0.00929394	0.140307
TCONS_00021681	0.173849	0.000651333	7.13066	0.00930209	0.140338
TCONS_00124915	0.0722557	0	11.7699	0.00931281	0.140438
TCONS_00136283	0.181358	0	9.71256	0.00933631	0.140639
XR_001434483.1	0	0.0847778	-9.4607	0.00941788	0.141434
TCONS_00151323	0.248809	0.00822083	4.89605	0.00946436	0.141731
XR_001433706.1	0	0.0275573	-7.80526	0.00953589	0.142535
XR_001435152.1	0.0319768	0.431174	-3.69625	0.00954747	0.142665
TCONS_00141561	3.81667e-05	0.126174	-9.14209	0.00957615	0.14297
TCONS_00082119	0.20785	0	9.93614	0.0096042	0.143295
TCONS_00063101	0.132097	0	9.66006	0.00961984	0.143467
XR_001434545.1	0	0.0270737	-9.79249	0.0096806	0.144049
TCONS_00024498	0	0.156567	-9.88711	0.0096833	0.144049
XR_001042199.1	0.119179	0.001601	5.35541	0.00972226	0.144257
TCONS_00154094	0.0199013	0.425272	-4.29231	0.00980936	0.144962
XR_001025326.1	0	0.0191495	-6.30434	0.00981633	0.144962
TCONS_00175293	0	0.134003	-8.07182	0.00981984	0.144962
TCONS_00150590	0.195096	0.0034775	5.0258	0.00982532	0.144962
TCONS_00156810	2.56823	0.416562	2.63544	0.00986742	0.145396
TCONS_00050162	0.0943708	0.815046	-3.066	0.00989227	0.145669
TCONS_00014922	14.9975	4.00103	1.97562	0.00990713	0.145732
TCONS_00138758	0.109717	0	7.82128	0.00992887	0.14602
TCONS_00207286	0	0.325326	-7.62784	0.00994624	0.146245
TCONS_00042867	0	0.0248022	-11.8097	0.00996233	0.146325
TCONS_00097998	0.185612	0	6.22238	0.00999251	0.146581
TCONS_00176518	0	0.0660078	-11.3177	0.010002	0.146608
TCONS_00162940	0.105035	0	9.6558	0.0100244	0.146741
TCONS_00182466	0	0.443339	-11.3061	0.0100604	0.147106
XR_001436708.1	0	0.0284137	-7.65711	0.0100965	0.147345
TCONS_00182972	0.66226	0	11.6084	0.0101023	0.147345
XR_001435192.1	0.0767762	0	9.58348	0.0101342	0.147591
TCONS_00057498	0.122917	0	8.02145	0.0101662	0.147722
XR_001435424.1	0.632279	0.0336732	4.23437	0.0101668	0.147722
XR_001434746.1	0.351934	0.0297233	3.57491	0.0101783	0.147826
XR_001023831.2	7.01667e-05	0.151655	-7.20223	0.0101926	0.147941
TCONS_00181056	0.0987667	0	7.9451	0.0102324	0.148393
TCONS_00232505	0.119305	0	8.3449	0.0102959	0.148747
TCONS_00119372	0	0.0694062	-11.2613	0.0103128	0.148838
TCONS_00183903	0.0779623	0	8.27734	0.0103901	0.149672
TCONS_00079698	0.474527	0.0400453	3.58629	0.0104084	0.149805
TCONS_00174557	0	0.166239	-7.57691	0.0104139	0.149805
TCONS_00003409	0	0.219576	-7.85139	0.0105461	0.151286
TCONS_00254603	3.08558	0.0547735	5.44245	0.0106248	0.151944
XR_001036966.2	1.37606	0.012096	6.73606	0.010629	0.15197
TCONS_00121993	0	0.0834093	-11.2045	0.0106411	0.152048
TCONS_00218340	1.29738	0.0431438	4.90382	0.0106803	0.15245
TCONS_00092132	0.155509	0	5.58433	0.0107035	0.152686
TCONS_00179023	0.414743	0	11.3899	0.0107866	0.153521
TCONS_00147225	0.00857333	0.291434	-4.43741	0.0108001	0.153555
TCONS_00068379	0	0.1195	-11.1548	0.0108492	0.153786
TCONS_00193105	0.100465	0	11.3748	0.0108553	0.153786
XR_001023371.2	0.0080085	0	11.3425	0.0108654	0.153786
TCONS_00177349	0.130012	0	7.93249	0.0108774	0.153918
XR_001041584.1	0.0910263	6.13803	-5.98114	0.0108934	0.154055
TCONS_00118511	0	0.0966618	-11.142	0.0109345	0.154389
TCONS_00159251	0.408384	0	7.69317	0.010935	0.154389
TCONS_00242692	0.00439633	0.197206	-5.02301	0.0110939	0.155849
TCONS_00146016	0	0.0953025	-11.0911	0.011191	0.156765
TCONS_00187839	0.168267	0	6.26079	0.0112001	0.156765
TCONS_00045722	0.195378	0	8.40236	0.0112011	0.156765
TCONS_00103461	0.00166267	0.0961982	-5.60088	0.0112156	0.156905
TCONS_00031983	0.0947888	0	11.2868	0.0112448	0.157017
TCONS_00179101	0	0.166519	-7.57214	0.0112474	0.157017
TCONS_00071893	0.00997833	0.150611	-3.90077	0.0112802	0.157255
XR_001038195.2	0.183628	0	6.88958	0.0114166	0.158581
XR_001434062.1	0.048208	0	9.32485	0.0114177	0.158581
TCONS_00161362	4.4211	0.419312	3.37078	0.0114367	0.158741
XR_001044464.2	0	0.0937363	-7.99768	0.0114508	0.158899
XR_001434115.1	0.373779	0.0171212	4.42216	0.0114551	0.158899
XR_001040881.1	0.0806618	0	7.60858	0.0114926	0.159132
TCONS_00117609	0.191969	0	7.81824	0.0115151	0.159315
XR_001023855.2	0.00455283	0.153295	-4.51468	0.011538	0.1596
TCONS_00185477	0.226349	0	9.38837	0.0115503	0.159698
TCONS_00051200	0	0.0985707	-9.15724	0.011596	0.160049
TCONS_00001367	0	0.0746237	-9.56583	0.0116087	0.16016
XR_001040206.1	0	0.0546492	-9.12572	0.0116381	0.160423
TCONS_00240008	0.10695	1.70757	-3.73771	0.0116711	0.160699
TCONS_00155002	0.272444	0.00574617	5.1236	0.0116812	0.160806
XR_001043348.2	0.594264	9.0409	-4.01345	0.0116917	0.160918
TCONS_00060883	0.285939	0.0073055	5.36743	0.011702	0.161027
TCONS_00184055	0.34305	0	11.215	0.0117331	0.161327
TCONS_00024031	0	0.090939	-10.9836	0.0118507	0.162311
TCONS_00184067	0.163204	0	9.55986	0.0118544	0.162314
TCONS_00084609	0.500957	0.0138247	4.9413	0.0118572	0.16232
TCONS_00243376	0.327345	0	11.1936	0.0119455	0.16327
TCONS_00198952	0	0.130986	-9.08152	0.0119711	0.163489
TCONS_00106891	0.0713388	0	11.2479	0.0119982	0.1636
XR_001033847.2	0.00504533	0.336135	-5.84227	0.0120074	0.163638
TCONS_00030862	0	0.161605	-9.15753	0.0120797	0.164418
TCONS_00240948	0	0.0747267	-10.9493	0.012102	0.164569
TCONS_00068811	0.0874442	0	11.1096	0.0121594	0.164959
TCONS_00157244	0	0.101129	-7.76375	0.0121715	0.164983
TCONS_00007677	0	0.0989192	-9.42038	0.0121739	0.164983
TCONS_00047507	1.7674	0.0898195	4.48505	0.0122	0.16524
TCONS_00005021	0.119345	0	9.31386	0.012328	0.166201
XR_001435140.1	0	0.0393687	-9.04163	0.0123516	0.166409
TCONS_00001661	0	0.0771162	-7.75075	0.0123804	0.166557
TCONS_00249345	0.0823942	0	11.1787	0.0124198	0.166839
TCONS_00094293	0.190069	0.00678983	4.59287	0.0124491	0.167059
TCONS_00009011	0	0.194522	-9.02566	0.0124589	0.167071
TCONS_00071461	0.20593	0	7.64047	0.0124636	0.167085
TCONS_00126472	0.0247502	0.512169	-4.23673	0.0124672	0.167085
TCONS_00175784	0.0625662	0	11.0527	0.0125032	0.167158
TCONS_00127852	0	0.133829	-10.8689	0.0125465	0.167612
TCONS_00100048	0	0.080726	-10.8687	0.0125587	0.167662
TCONS_00183106	0	0.091799	-10.8684	0.012559	0.167662
TCONS_00183107	0	0.157392	-6.15098	0.0126874	0.168554
XR_001434506.1	0	0.024476	-10.845	0.0127185	0.168716
TCONS_00024160	0.119696	0	11.0219	0.0127432	0.168911
XR_001041531.1	0	0.0451137	-10.8377	0.012773	0.169162
TCONS_00027989	0	0.123116	-11.2983	0.0127739	0.169162
TCONS_00218339	1.59145	0.031854	5.89842	0.0128542	0.169892
TCONS_00247009	0.320777	0.00619367	5.66144	0.0128958	0.170126
TCONS_00187830	0.12192	0	9.25387	0.0128966	0.170126
TCONS_00000279	0.255978	0	9.15809	0.0129133	0.170248
TCONS_00257420	0.0157782	0.441814	-4.64386	0.0129733	0.170713
TCONS_00224474	0.0198972	0.250533	-3.24367	0.0129774	0.170713
TCONS_00083977	1.35318	0.202045	2.82374	0.013021	0.171065
TCONS_00221876	0.0169427	0	9.26166	0.0130269	0.171065
XR_001434243.1	0.157247	0	7.44591	0.0130313	0.171084
TCONS_00024303	0	0.0430842	-7.21465	0.0130506	0.17125
TCONS_00092723	0.0906665	0	11.0634	0.013111	0.171835
TCONS_00257057	0.335229	0.0129808	4.04164	0.0131499	0.172246
TCONS_00126390	0	0.147067	-7.41336	0.0131842	0.172532
TCONS_00234266	0.043789	0.651169	-3.63866	0.0131883	0.172552
TCONS_00000125	0.0623685	0.716409	-3.43431	0.0132126	0.172711
TCONS_00075993	0.008023	0.220582	-4.23439	0.0132589	0.173109
TCONS_00252597	0.112493	0	7.54065	0.013271	0.173109
TCONS_00175440	0	0.106113	-8.96011	0.0132723	0.173109
TCONS_00188226	0	0.123287	-7.74416	0.0132735	0.173109
TCONS_00043420	0	0.0801258	-10.7543	0.0133448	0.173643
TCONS_00073714	0	0.0570298	-10.7531	0.0133619	0.173833
XR_001021756.2	0	0.0473405	-10.7482	0.0133765	0.173924
XR_001434849.1	0.092027	0	9.40423	0.0133829	0.173938
TCONS_00222850	0	0.129842	-10.7453	0.0133851	0.173938
TCONS_00062331	0.343418	0.0183462	4.05513	0.0134825	0.174808
TCONS_00068100	0	0.152764	-9.16001	0.0135147	0.175081
TCONS_00069144	0	0.0878957	-10.7302	0.0135163	0.175081
TCONS_00225887	0.248501	0.00106567	6.18306	0.0135894	0.175665
XR_001027446.2	0.0126503	0	7.41039	0.013593	0.175665
TCONS_00205103	0	0.440517	-8.89347	0.0136087	0.175693
XR_001436035.1	0	0.0220595	-9.21754	0.0136753	0.176312
TCONS_00225373	0.110563	0	9.25826	0.0137488	0.176863
XR_001436787.1	0	0.00691217	-8.88239	0.0137869	0.177254
TCONS_00028085	0.123664	0	10.8692	0.0139953	0.178997
TCONS_00136288	0.066448	0	9.05306	0.0140072	0.179017
TCONS_00096625	0.436901	0.0327842	3.66579	0.014027	0.179104
TCONS_00078362	0.1211	0	10.9391	0.0140634	0.179236
TCONS_00043534	0.61872	0.0165605	5.15239	0.0141228	0.179709
TCONS_00205956	0.663282	0	10.9225	0.0141394	0.179709
XR_001436194.1	0	0.042781	-5.75111	0.0141636	0.179914
TCONS_00239529	0.000209333	0.796667	-10.3117	0.0141999	0.180242
TCONS_00259147	0	0.311574	-7.571	0.0142145	0.180354
TCONS_00231357	0.0745255	2.71109	-5.10154	0.0142253	0.180367
TCONS_00244299	0.14212	0	10.8387	0.0142289	0.180378
TCONS_00230498	0.0677093	0	10.8201	0.0142498	0.180543
TCONS_00226494	0	0.0610948	-8.90153	0.0143019	0.181036
TCONS_00151327	0.25288	0.01394	4.1609	0.0143051	0.181036
TCONS_00236601	0	0.151504	-8.82741	0.0143095	0.181036
TCONS_00186103	0.124378	0	10.8956	0.0143157	0.181078
TCONS_00043392	0	0.163375	-5.83108	0.0143321	0.181163
TCONS_00070267	0.204551	0.00577217	4.60851	0.014355	0.181309
TCONS_00031369	0.086899	0	10.8057	0.0143626	0.181372
TCONS_00116653	0.017732	0.705225	-5.14804	0.0143894	0.181515
TCONS_00077308	0	0.0988877	-8.8123	0.0143945	0.181515
XR_001436898.1	0	0.004866	-10.6232	0.014402	0.181537
TCONS_00152557	0	0.211153	-5.891	0.0144714	0.182163
TCONS_00183254	0.270436	0.00613067	5.25148	0.0144773	0.182185
TCONS_00000544	0	0.224459	-8.83392	0.014497	0.182323
XR_001042703.2	0.0491848	0.00170867	4.98845	0.0145236	0.182468
TCONS_00141678	0	0.33846	-7.36642	0.0145522	0.182694
TCONS_00108078	0	0.0816528	-10.6024	0.014579	0.182763
TCONS_00095525	0.0694612	0	10.7882	0.0146295	0.183186
TCONS_00206945	0.155922	0	7.25572	0.0147797	0.184258
TCONS_00228600	0.0176925	0.312445	-3.77571	0.0147811	0.184258
TCONS_00257332	5.63851	0.925671	2.68148	0.014797	0.184389
XR_001025457.2	0.735612	0.018396	5.05897	0.0148349	0.184795
TCONS_00083053	0.11516	0	9.00339	0.0148631	0.184885
TCONS_00256351	0.390827	0.0263785	3.73288	0.0148636	0.184885
XR_001035513.2	0	0.0387832	-9.39426	0.0148888	0.185125
TCONS_00087287	0.0588797	0	10.8274	0.0148963	0.185125
TCONS_00115817	0.0962087	0	10.825	0.0149285	0.185435
TCONS_00210847	1.98395	0.483138	2.29545	0.0149346	0.185435
XR_001025455.2	9.57856	0.619597	3.85984	0.0150071	0.186009
TCONS_00240180	0	0.119506	-10.9778	0.0150105	0.186009
TCONS_00069717	0	0.103505	-10.9745	0.0150715	0.186394
TCONS_00073285	0.0297672	0.949392	-4.95015	0.015097	0.186561
TCONS_00001518	0.00833833	0.278988	-4.7959	0.0151113	0.186561
TCONS_00104111	0.0820345	0	7.40641	0.0151158	0.186561
TCONS_00257525	0.62218	0.0572277	3.40664	0.0151215	0.186561
TCONS_00165027	0	0.0948242	-8.35188	0.0151439	0.186682
TCONS_00056344	0	0.113097	-7.20634	0.0151506	0.186682
TCONS_00168549	0.150638	0	7.17341	0.0151598	0.186682
TCONS_00000358	0	0.100673	-9.18351	0.0152051	0.187139
TCONS_00205998	0.362884	2.8164	-2.89434	0.0152118	0.187189
TCONS_00205263	0	0.091354	-10.5124	0.0152345	0.187359
XR_001027578.2	0	0.135148	-8.70887	0.015297	0.187767
TCONS_00215740	0	0.0707805	-10.4995	0.0153179	0.187856
TCONS_00133404	0.212763	0.0086695	4.19678	0.0153366	0.188052
TCONS_00112907	0.444779	0.0160343	4.39801	0.0153906	0.188536
XR_001436767.1	0	0.0354108	-6.91106	0.0154137	0.188662
TCONS_00136501	0	0.472005	-9.0288	0.0154311	0.188807
TCONS_00227621	0.0793392	0	9.2334	0.0154567	0.188886
TCONS_00142973	0.185762	0	10.6755	0.015549	0.189577
TCONS_00183892	0.157856	0	7.26983	0.0155831	0.189848
TCONS_00111905	0	0.135702	-7.23649	0.0156113	0.190101
XR_001436524.1	0	0.058071	-8.67407	0.0156237	0.190184
TCONS_00059733	0.171608	0	7.25821	0.0156798	0.190564
TCONS_00182203	0.132418	0	5.61539	0.0156992	0.190639
XR_001022816.1	0.041465	0.572748	-3.56565	0.0158118	0.191538
TCONS_00150191	0.0905905	0	10.6362	0.0158128	0.191538
TCONS_00217425	0.12722	0	7.2149	0.0158523	0.191815
TCONS_00247417	0.0200952	1.60017	-6.39105	0.0158575	0.19183
TCONS_00247523	0	0.0816163	-8.68007	0.0159412	0.192282
TCONS_00020770	0.0616405	0	10.6015	0.0159524	0.192332
TCONS_00088300	3.87661	0	10.6341	0.0159537	0.192332
TCONS_00152679	0.0716017	0.615736	-3.18668	0.0159591	0.192364
TCONS_00195326	0.129476	0	10.6291	0.0159946	0.192656
XR_001038942.2	0.003816	0.139611	-5.08125	0.0160375	0.192802
TCONS_00184979	0.0991285	0	10.6227	0.0160424	0.192827
TCONS_00158373	0.400987	0.0455788	3.12926	0.0160951	0.193225
TCONS_00229978	0.0985658	0	8.93792	0.0161549	0.193673
TCONS_00040516	0.220226	0	5.08099	0.0161722	0.193787
TCONS_00147324	1.08757	6.07619	-2.38413	0.0161893	0.193904
TCONS_00179308	0.122637	0	10.6623	0.0162135	0.194071
TCONS_00092897	0.161757	0	8.8436	0.0162197	0.1941
TCONS_00036883	0.0161227	0.59891	-4.79426	0.0162263	0.1941
TCONS_00154076	0	0.226672	-8.97926	0.0163016	0.194652
TCONS_00237582	0	0.160211	-6.89228	0.0163196	0.194766
TCONS_00140904	0.848889	0.0495008	4.08843	0.0163497	0.195058
XR_001436332.1	0.139284	0	5.51233	0.0163936	0.195277
XR_001436833.1	0	0.0038165	-8.60281	0.0164116	0.195455
TCONS_00138017	0.530561	0.0130933	4.97415	0.0164254	0.195555
XR_001020952.2	0.919827	0.119387	2.94371	0.0164369	0.195585
TCONS_00200561	0	0.0903012	-10.3416	0.0165045	0.196108
TCONS_00051259	0.143773	0.003335	5.42803	0.016523	0.196242
XR_001435277.1	0	0.00786083	-4.93265	0.0165609	0.19659
TCONS_00128128	0.129485	0	8.74997	0.0165662	0.196619
TCONS_00082008	0	0.144261	-5.48752	0.0165852	0.196685
TCONS_00136503	0.0131708	0.619054	-5.32285	0.0166462	0.197127
XR_001435936.1	0.0236307	0	7.13136	0.0166995	0.197487
TCONS_00122471	0	0.203799	-6.79366	0.0167265	0.197602
XR_001436189.1	0.00971833	0	8.72508	0.0167694	0.197855
TCONS_00202790	0	0.0687828	-10.3085	0.0167887	0.197883
TCONS_00195148	0.149402	0	10.5356	0.0167934	0.197883
TCONS_00016309	0.105046	0	8.7206	0.0167963	0.197883
TCONS_00069998	0.791551	0.030621	4.65349	0.0168069	0.197939
TCONS_00200507	0.216937	0.0115157	4.32573	0.0168182	0.197939
TCONS_00140649	0	0.195489	-6.93999	0.0168304	0.198016
TCONS_00161554	0.177963	0	8.79137	0.0168759	0.198415
TCONS_00236911	1.07086	6.46654	-2.54424	0.0168986	0.198546
TCONS_00161783	0	0.064681	-10.2909	0.0169808	0.199206
TCONS_00015923	0.138337	0	5.46365	0.01701	0.199514
TCONS_00039218	0.006928	0.278863	-5.11184	0.0170258	0.199598
TCONS_00073012	0	0.0856698	-10.2793	0.0170425	0.199627
TCONS_00232087	0.420509	0.0163235	4.56678	0.0170456	0.199627
TCONS_00009438	0	0.250061	-7.17127	0.0170643	0.199778
TCONS_00000280	0.190115	0	8.76042	0.0170719	0.199799
TCONS_00035764	0.112304	0	8.75893	0.0171087	0.199975
TCONS_00175220	0.222131	0	10.4886	0.0171131	0.199975
XR_001042094.1	0	0.0155782	-8.53046	0.0171397	0.20014
TCONS_00072184	0.208207	0.006219	4.47682	0.01723	0.200823
XR_001434938.1	0	0.019112	-10.2502	0.0173057	0.201372
TCONS_00190911	0	0.047764	-7.3699	0.0173214	0.201487
TCONS_00058496	0.907679	0.0780058	3.60164	0.0173293	0.201491
TCONS_00254372	0	0.536903	-10.2465	0.0173391	0.201522
TCONS_00240044	0.0137712	0.293254	-4.33469	0.0173657	0.201693
TCONS_00151322	0.573969	0.0628665	3.22488	0.017387	0.201751
TCONS_00076718	0.224392	0	10.4487	0.0173881	0.201751
XR_001436893.1	0	0.0565122	-10.2406	0.0174097	0.20193
XR_001036668.1	0	0.14655	-6.71476	0.0174152	0.20193
TCONS_00247180	0	0.130882	-8.92457	0.0174422	0.202065
TCONS_00220597	18.7346	3.72292	2.34544	0.0174948	0.202274
XR_001024674.2	0	0.0497667	-6.68834	0.0175052	0.202326
TCONS_00069438	0.0805545	2.85627	-4.92796	0.0175702	0.202737
TCONS_00225875	0.120971	0	6.93486	0.0176067	0.203012
TCONS_00057891	0	0.106497	-10.2183	0.0176558	0.203215
TCONS_00094599	0.142816	0	10.4062	0.0177643	0.203613
XR_001023093.2	0	0.0292077	-7.53543	0.0177678	0.203618
XR_001433880.1	0.273242	0	8.86982	0.0177753	0.203669
TCONS_00128529	0.640953	0.0351548	3.71807	0.0178365	0.204072
TCONS_00137625	0.635255	0.0772928	3.11125	0.0178692	0.204237
TCONS_00099435	0.0791042	0	10.3663	0.0179844	0.205112
TCONS_00222595	0.598278	0.0728177	3.07533	0.0180086	0.205286
XR_001435160.1	0.202094	0.98958	-2.26406	0.0180329	0.205427
TCONS_00212390	0.381194	0	8.66841	0.0180857	0.205823
TCONS_00220539	0.0743107	0	8.98133	0.018105	0.20593
TCONS_00080925	0.275815	0	10.4284	0.0181387	0.206158
TCONS_00236322	0	0.0623748	-10.1572	0.0182134	0.206663
TCONS_00218788	0	0.065888	-10.1538	0.0182332	0.206802
TCONS_00003404	0.0169877	0.455929	-4.52538	0.0182355	0.206802
TCONS_00232779	0	0.101399	-6.99561	0.0182444	0.206809
TCONS_00042827	0.111056	0	10.4174	0.0182768	0.207109
XR_001020965.1	0	0.0188123	-8.50003	0.0182926	0.207186
TCONS_00183098	0.107415	0	10.3407	0.0183887	0.207762
TCONS_00186110	0.0202193	0.25762	-3.6285	0.0184185	0.207885
TCONS_00014862	0.112395	0	10.3173	0.0184268	0.207885
TCONS_00120317	0.1964	0	8.6568	0.0184898	0.208354
TCONS_00069770	0	0.0722932	-10.1139	0.0185077	0.208457
TCONS_00129771	0.137246	0	10.3016	0.0186217	0.209399
XR_001020891.2	0.143789	0	6.98066	0.0187032	0.21004
TCONS_00047938	0.0853013	0	8.64978	0.0187664	0.210613
XR_001043081.2	0	0.0136257	-5.72769	0.0188086	0.210875
TCONS_00048994	0.409116	0	7.51063	0.0188193	0.210932
TCONS_00228799	0	0.12216	-8.37731	0.0188445	0.211146
XR_001435451.1	0	0.0206127	-5.37748	0.0188525	0.211201
TCONS_00126473	0.00537667	0.234515	-5.63255	0.0188652	0.211274
TCONS_00065464	0.0552312	0.456915	-2.99238	0.0188794	0.211367
TCONS_00118938	0.125359	0	10.29	0.0188941	0.211461
TCONS_00212389	2.80747	0.412888	2.80943	0.0189039	0.211536
TCONS_00245555	0.212354	1.96691	-3.09023	0.0189354	0.211697
TCONS_00147788	0.0633808	0	6.93788	0.018942	0.211697
TCONS_00242871	0	0.214274	-10.5389	0.0189425	0.211697
TCONS_00069645	0.28338	0	7.07023	0.018949	0.211697
TCONS_00173570	0.224686	0	10.2754	0.019005	0.212129
TCONS_00116699	0.0881367	0	8.59675	0.0190247	0.212129
XR_001024872.2	0	0.0401035	-8.39137	0.0190503	0.212243
TCONS_00085532	0.666434	0.10437	2.70264	0.0190934	0.212552
XR_001436417.1	0.138426	0	8.63525	0.01912	0.212765
TCONS_00072149	0.272543	0.0119422	4.28386	0.0192025	0.213421
TCONS_00126310	0	0.093447	-10.0358	0.0192573	0.213789
TCONS_00046542	0.527532	0.011464	5.61451	0.0193254	0.214171
TCONS_00004981	0.561367	0.0544538	3.51604	0.0193502	0.214282
TCONS_00132983	0.167267	0	10.3155	0.0193663	0.214411
TCONS_00140164	2.30476	0.221532	3.47661	0.0193733	0.214454
TCONS_00234899	0.0281843	0.891692	-5.02025	0.0193963	0.214675
TCONS_00060351	0	0.105078	-6.56193	0.0194419	0.214869
TCONS_00050970	0	0.205486	-7.07978	0.0194492	0.214915
TCONS_00085728	0	0.123425	-8.66859	0.0194921	0.215112
TCONS_00224089	0.0162807	1.7448	-6.38933	0.0195124	0.215268
TCONS_00193599	0.410839	0.0238555	4.31049	0.0195405	0.215449
TCONS_00189928	0.086082	0	10.3017	0.0195451	0.215449
TCONS_00197363	0.135513	0	7.07262	0.0195583	0.215525
TCONS_00148620	0.0506547	1.64804	-5.02928	0.0195732	0.215558
TCONS_00091222	2.97856	0.179416	3.98285	0.0196771	0.216323
TCONS_00242680	0.10504	0	6.74695	0.0196803	0.216323
TCONS_00132985	0.163042	0	10.279	0.0197284	0.216713
TCONS_00009754	0.0765627	0	10.1732	0.0197603	0.21696
TCONS_00065663	0	0.108453	-9.9793	0.0197702	0.217035
TCONS_00126452	0.0200032	0	10.1712	0.0198218	0.217393
TCONS_00172655	0.853619	0.0524943	4.20394	0.0198418	0.217508
TCONS_00151131	0	0.005832	-9.96893	0.0198972	0.217965
XR_001039940.2	0	0.0612542	-6.47502	0.0199415	0.218119
TCONS_00107560	0	0.0962075	-8.78005	0.0200098	0.21876
TCONS_00214149	0	0.12194	-8.70572	0.0200398	0.218982
TCONS_00093511	0.239207	0.00490733	5.72176	0.0200453	0.219007
TCONS_00186004	0.0640807	0	10.1611	0.0200607	0.219036
TCONS_00035097	0.0104528	0.264449	-3.99062	0.020129	0.219519
TCONS_00044883	0.0125495	0.480147	-5.10448	0.0201336	0.219519
TCONS_00076426	0	0.0651828	-8.36209	0.020156	0.219653
TCONS_00066566	0.00444167	0.187689	-5.14175	0.0201664	0.219653
TCONS_00000207	0	0.196373	-6.80337	0.0202091	0.219845
XR_001436357.1	0	0.19475	-8.51724	0.0202327	0.220008
XR_001435286.1	0	0.0074275	-8.27519	0.0202457	0.220115
XR_001030771.1	0	0.0661975	-4.55805	0.0202605	0.220206
TCONS_00182307	0	0.134006	-8.2713	0.0202899	0.220404
TCONS_00149552	0.00907667	0.364385	-5.20916	0.0202915	0.220404
TCONS_00227975	0.0020815	0.230455	-6.98422	0.0203107	0.220438
TCONS_00229156	0.148392	0.000926333	6.59456	0.0203239	0.220547
XR_001436546.1	0	0.0286247	-6.81081	0.0203938	0.221027
TCONS_00226491	0	0.0561045	-9.92032	0.0204164	0.221237
TCONS_00037384	0.0401698	0.892694	-4.63408	0.020438	0.221401
TCONS_00073627	0.0710543	0	10.1263	0.0204869	0.221687
TCONS_00088044	0.0451077	0	8.5367	0.0205234	0.221943
XR_001435813.1	0.0275972	0	6.73894	0.0205755	0.222401
TCONS_00162590	0.107606	0	7.72882	0.0205883	0.22247
TCONS_00132986	0.249425	0.003135	6.45246	0.0206133	0.222636
TCONS_00076199	0.093195	0.00196133	5.01006	0.0206644	0.222892
TCONS_00143980	0.073906	0	9.04504	0.0206896	0.223048
XR_001435443.1	0.159489	0.00557233	5.0214	0.0207124	0.223102
TCONS_00026369	0	0.0771818	-6.88967	0.0207283	0.223164
TCONS_00074072	0	0.094687	-9.89363	0.0208129	0.223949
TCONS_00179307	0.0867982	0	10.1643	0.0208988	0.224479
TCONS_00165091	0	0.121182	-10.3268	0.020915	0.224479
TCONS_00110868	0.794825	0.0029985	8.1558	0.0209159	0.224479
TCONS_00020315	0.00998567	0.241034	-4.94617	0.0209165	0.224479
TCONS_00144262	0	0.0730248	-9.87955	0.0209738	0.224837
TCONS_00068242	0.0680955	0	10.1511	0.0210119	0.225035
TCONS_00027475	0.133952	0	10.0312	0.0210639	0.225312
TCONS_00151646	0.956831	0.00941833	6.74935	0.02111	0.225665
TCONS_00183104	0.0128642	0.963083	-6.21162	0.0211165	0.22568
TCONS_00036893	0	0.0717683	-8.8253	0.0211263	0.22568
XR_001433695.1	0.134448	0	10.0597	0.0211592	0.225946
XR_001436264.1	0.00115183	0.072914	-4.50115	0.0212131	0.226324
TCONS_00237675	0	0.063787	-9.85719	0.0212144	0.226324
TCONS_00062077	0.162028	0	8.42305	0.0212301	0.226457
TCONS_00203179	0	0.082984	-8.1876	0.0212893	0.226877
XR_001039836.2	0.455536	0	8.3601	0.0212927	0.226878
TCONS_00255310	2.99618	0.365451	3.10789	0.0212996	0.226904
TCONS_00258152	0.0251427	0.402861	-3.81966	0.0213675	0.227323
XR_001434516.1	0	0.00767783	-8.15677	0.0214167	0.227671
TCONS_00016783	0.0926293	0	8.41923	0.0214351	0.227831
TCONS_00195166	1.59626	0.0362908	5.65094	0.0214896	0.22827
XR_001434391.1	0	0.00756267	-8.25657	0.0215111	0.228428
TCONS_00178204	0.000360333	0.198664	-8.69535	0.0215584	0.228719
TCONS_00143599	0	0.082367	-9.83035	0.021564	0.228743
XR_001041550.1	0.029359	0.286505	-3.05479	0.0216191	0.22906
TCONS_00230508	0	0.104981	-8.55253	0.021656	0.229331
TCONS_00256379	0.117267	0	6.6065	0.021822	0.230345
TCONS_00051890	0	0.0772978	-9.80704	0.0218724	0.230736
XR_001024632.2	0.00743883	0.0702317	-2.99221	0.0221263	0.232701
XR_001041728.1	0	0.0244687	-5.2578	0.0221324	0.23273
TCONS_00135711	0.0232587	0	10.0465	0.0221485	0.232828
TCONS_00099994	0.205413	0.015428	3.87191	0.0221817	0.233034
XR_001039095.2	0.126804	0.017807	2.83668	0.0222024	0.233075
TCONS_00103409	0	0.177228	-6.5654	0.0222133	0.233131
TCONS_00027523	0.203639	0	8.38971	0.0222146	0.233131
TCONS_00112309	0.0066155	0.184809	-4.68649	0.0222663	0.233497
TCONS_00232175	1.89771	0.152232	3.66418	0.0222893	0.233701
TCONS_00197245	0.159937	0	9.94973	0.0223191	0.233866
TCONS_00029811	0	0.162836	-6.33499	0.0223211	0.233866
TCONS_00227709	0.189592	1.49873	-2.79619	0.0223876	0.23434
XR_001044638.2	0	0.11744	-10.1995	0.0224386	0.234732
TCONS_00050057	0	0.09596	-9.75067	0.0224913	0.235192
TCONS_00030850	0.0159623	0.246635	-3.81042	0.0225197	0.235317
TCONS_00173678	0.135351	0.000308667	6.84135	0.0225705	0.235622
TCONS_00075964	0.0306775	0.260021	-3.01383	0.0226401	0.236158
TCONS_00021390	4.64655	0.881058	2.44283	0.0226776	0.236406
TCONS_00069435	0.123607	1.6901	-3.56269	0.0226821	0.236417
TCONS_00227969	0	0.0908023	-8.15932	0.02269	0.236463
TCONS_00022193	0.128686	0	9.9146	0.0227645	0.237025
XR_001434803.1	0	0.0130052	-8.20494	0.022778	0.237097
TCONS_00048269	0.518722	0	8.65989	0.0227783	0.237097
TCONS_00065762	0.163707	0.010454	4.11716	0.022825	0.237404
XR_001032994.2	0	0.00989633	-6.64496	0.0228933	0.237791
TCONS_00231775	0	0.441345	-9.72124	0.0228999	0.237805
TCONS_00176877	0.551798	0	8.60787	0.0229149	0.237879
XR_001435567.1	0.0146592	0.246499	-3.78724	0.0229438	0.238064
TCONS_00215603	0.280241	0	8.36717	0.0230345	0.238359
XR_001021647.1	0	0.215417	-8.02085	0.0231112	0.238825
XR_001043298.1	0.158293	0	4.59708	0.0231761	0.239213
TCONS_00223465	0.57013	0.0196185	4.62695	0.0231875	0.23926
TCONS_00253111	2.45574	0	9.86528	0.0232656	0.23975
TCONS_00056594	0	0.10513	-9.68604	0.02333	0.240172
TCONS_00207603	0.0577457	0	9.93921	0.0233408	0.240172
XR_001036688.2	0	0.0234268	-6.50362	0.0233423	0.240172
TCONS_00239992	0	0.123824	-9.67811	0.0234023	0.240525
TCONS_00116652	0	0.154379	-8.63816	0.0234038	0.240525
TCONS_00259360	0	0.14337	-6.19969	0.0234384	0.240838
XR_001435010.1	0	0.0508013	-9.66952	0.0235307	0.241498
TCONS_00009005	0.0413907	0.673948	-3.93489	0.0235395	0.241553
TCONS_00113940	0.0483847	0	8.24819	0.023572	0.24185
XR_001434201.1	0	0.0837358	-5.65553	0.023622	0.24229
TCONS_00000962	0.334092	0.029973	3.38388	0.0236423	0.242416
TCONS_00243375	0.64338	0.0443315	3.88853	0.0236482	0.242416
XR_001434731.1	0	0.0143443	-7.97891	0.0237363	0.242804
XR_001435856.1	0.00507017	0.112713	-4.54099	0.0237508	0.242816
TCONS_00079599	0.178673	0	6.54511	0.023789	0.242993
TCONS_00141878	4.8512	0.90627	2.46574	0.0237957	0.242993
TCONS_00182319	0	0.0553057	-9.64783	0.0238251	0.243083
TCONS_00165365	0	0.142869	-9.64783	0.0238298	0.243083
XR_001436564.1	0	0.0208468	-6.15382	0.0238601	0.243263
TCONS_00136726	0.512277	0.0257913	4.12621	0.0239325	0.243806
XR_001433820.1	0.0099115	0	8.26281	0.0239575	0.243931
XR_001436827.1	0	0.00254367	-8.07013	0.0239625	0.243931
TCONS_00013295	0	0.0692077	-9.63571	0.0240131	0.244193
TCONS_00100064	0	0.0857908	-9.63296	0.0240232	0.244261
TCONS_00236914	0.086117	0.567068	-2.65211	0.0241043	0.24458
TCONS_00178685	0	0.103837	-9.62381	0.0241165	0.244613
TCONS_00243190	0.0845158	0	9.81949	0.0241431	0.244747
TCONS_00112254	0.0763382	0	9.88472	0.0241457	0.244747
TCONS_00069433	0.212378	1.5264	-2.63706	0.0241685	0.244834
TCONS_00096155	0.00577367	0.540712	-6.43378	0.0242839	0.245505
TCONS_00238904	0	0.0793662	-9.60845	0.0243102	0.245655
TCONS_00141945	0.0370135	0.435746	-3.61807	0.0243771	0.246114
TCONS_00079290	0.0956628	0.82901	-3.09598	0.0244807	0.246804
XR_001435193.1	0.0415515	0	8.54458	0.0244852	0.246804
TCONS_00020238	0.013243	0.375701	-4.16309	0.0244858	0.246804
TCONS_00021669	0.448492	0.0221815	3.84205	0.0245384	0.247128
TCONS_00060985	0	0.063264	-9.58903	0.0245617	0.247254
TCONS_00141113	0.0741405	0.525166	-2.67258	0.024596	0.247474
TCONS_00233080	0.283058	0.0151843	4.0772	0.0246495	0.247631
TCONS_00119977	0.0788732	0	9.7741	0.0246813	0.247821
TCONS_00212402	0.10676	0	9.76948	0.0247402	0.248217
XR_001436962.1	0	0.0572912	-8.32947	0.0248396	0.248842
TCONS_00137206	0	0.113274	-6.51491	0.0248657	0.249004
TCONS_00043775	2.81295	0.069443	5.65202	0.0248758	0.249069
TCONS_00137795	4.25617	0.294025	3.88519	0.0249291	0.249493
TCONS_00114987	0.151303	0	9.75085	0.0249603	0.24967
TCONS_00255700	0	0.0427337	-5.43315	0.0249721	0.24967
TCONS_00110391	0.0361815	0.254501	-3.02558	0.024995	0.24979
XR_001436719.1	0	0.0467425	-8.08021	0.0250235	0.250003
TCONS_00013107	0	0.0556533	-8.11055	0.0250578	0.250201
TCONS_00183914	0.00571467	0.215039	-5.0907	0.0251898	0.251045
TCONS_00000130	0.159304	1.04904	-2.59542	0.0253051	0.251849
TCONS_00148772	0.236177	0	6.39323	0.025307	0.251849
TCONS_00247418	0.106147	0.651502	-2.64176	0.0253162	0.251882
TCONS_00062755	0	0.0935647	-9.52466	0.0253737	0.252258
TCONS_00048383	0	0.0917107	-9.52466	0.0253775	0.252259
XR_001043076.2	0.211704	0.0036765	5.71329	0.0253852	0.252262
TCONS_00172166	0.230089	0	8.33524	0.0253929	0.252303
TCONS_00189385	0.563591	2.00003	-1.74456	0.0254292	0.252627
TCONS_00119537	0.192229	0.0211588	2.92586	0.0254599	0.252859
TCONS_00248076	0.248742	0.0026155	6.39653	0.0255065	0.253162
TCONS_00200102	0.286147	1.266	-2.03288	0.0255118	0.253162
XR_001027592.2	0	0.032319	-7.90996	0.0255539	0.253463
TCONS_00233857	0	0.146481	-9.51079	0.025583	0.253643
TCONS_00208353	0.103618	0	9.70805	0.0256096	0.253809
TCONS_00147761	0.0992855	0	9.76341	0.0256225	0.253811
TCONS_00075507	0.0438932	0.559086	-3.80817	0.0257004	0.254264
TCONS_00076847	0	0.0434713	-9.49726	0.0257449	0.25459
XR_001433966.1	0.0944218	0.882511	-2.96543	0.0258158	0.254705
TCONS_00074902	0.37191	0.00518983	5.94816	0.0258424	0.254821
TCONS_00067417	0.00909017	0.2951	-4.76974	0.0258802	0.255022
TCONS_00087167	0.182566	0	9.68616	0.0258866	0.255022
TCONS_00129747	0.0723155	0.503766	-2.72031	0.0258924	0.255022
TCONS_00195406	0.0721213	0	9.65272	0.0259121	0.25518
TCONS_00023019	0	0.108092	-6.13343	0.0259517	0.255423
TCONS_00202981	0.115024	0	9.67385	0.026034	0.255978
XR_001025525.2	7.70779	0.730689	3.49648	0.0260541	0.256065
TCONS_00134249	0	0.154024	-6.68584	0.0260944	0.256315
TCONS_00255704	0.00459467	0.175245	-4.40651	0.0262182	0.257091
TCONS_00047529	0	0.172739	-6.12716	0.0262309	0.257179
TCONS_00051468	0	0.131916	-9.87426	0.0263532	0.258011
TCONS_00122924	0	0.0627092	-9.45352	0.0263969	0.258292
TCONS_00038582	0	0.105134	-7.91353	0.0264114	0.258304
XR_001436485.1	0.0597822	0	8.08996	0.0264207	0.258304
TCONS_00012950	0.136554	0.0083875	3.78511	0.026452	0.258445
TCONS_00096030	0.809902	0.0650202	3.75359	0.0265356	0.259071
TCONS_00049768	0.362117	0.0222337	4.14035	0.0265385	0.259071
TCONS_00045721	0.152349	0	8.03699	0.0265752	0.259207
TCONS_00191965	0	0.0818965	-9.43585	0.0266625	0.259711
TCONS_00087800	0.136507	0	8.25	0.0267008	0.25984
TCONS_00253366	0	0.106316	-5.09488	0.0267021	0.25984
TCONS_00113192	0.382539	0.0264613	3.99929	0.0267574	0.260166
TCONS_00075841	0.0659385	0.418063	-2.62077	0.0267798	0.260236
TCONS_00022982	0.0844072	0	9.62099	0.0267819	0.260236
TCONS_00117933	0.00808567	0.272124	-4.85216	0.0267928	0.260281
TCONS_00130901	0	0.097896	-9.42199	0.0268278	0.260448
TCONS_00137517	0.143674	0	6.13418	0.0268353	0.260473
TCONS_00065509	0.224804	0.0152795	3.89352	0.026848	0.260559
TCONS_00138946	0.50178	0.0823122	2.59044	0.0268601	0.260603
TCONS_00022017	0.00273233	0.161406	-5.7968	0.0269199	0.260854
TCONS_00224295	0.14512	0	9.60811	0.0269615	0.260983
TCONS_00251252	0	0.0771357	-9.41054	0.0269655	0.260983
TCONS_00094289	0	0.097306	-9.40735	0.0270013	0.261128
TCONS_00249486	0	0.106913	-7.75488	0.0270922	0.261769
TCONS_00160894	0.0694967	0	8.10129	0.0270942	0.261769
TCONS_00193250	0.209708	3.86667e-05	8.27509	0.0272819	0.263029
XR_001043068.2	0	0.013965	-6.18349	0.02733	0.263278
TCONS_00208794	0	0.0135287	-6.06773	0.0273345	0.263278
TCONS_00015037	0	0.145033	-7.7696	0.0273509	0.263288
TCONS_00009010	0	0.171989	-9.37956	0.0274065	0.263529
TCONS_00109920	0.0687168	0	9.65173	0.0274266	0.26366
TCONS_00076058	0.0628528	0	9.55487	0.0274324	0.26366
TCONS_00253944	0	0.216571	-6.15389	0.0274354	0.26366
TCONS_00144755	0.00800967	0.230276	-4.12534	0.027475	0.263856
TCONS_00123409	0	0.0217663	-5.01919	0.0275098	0.264067
XR_001024715.1	0.033205	0	6.19797	0.0275122	0.264067
TCONS_00141408	0.592246	0.0382632	4.08501	0.0275405	0.264177
TCONS_00004340	0	0.104072	-9.36631	0.0275776	0.264289
XR_001434486.1	0.0259555	0	7.88824	0.0276428	0.264583
TCONS_00099455	0.0778388	0.485272	-2.55537	0.0276768	0.264658
TCONS_00132984	0.104604	0	9.63807	0.0276852	0.264658
TCONS_00040306	0	0.0680732	-9.35323	0.0276853	0.264658
TCONS_00130533	0.0819332	0	9.61984	0.0277083	0.264841
XR_001027085.2	0.0360317	0	6.65866	0.0277345	0.264945
TCONS_00094626	0.0523327	0	9.54735	0.0278037	0.265321
XR_001435697.1	0	0.0147137	-7.70039	0.0278189	0.265321
XR_001436018.1	0.00534617	0	7.95233	0.0278536	0.26542
TCONS_00131160	0	0.155628	-6.37981	0.0278781	0.265617
TCONS_00157375	0	0.0621833	-5.98718	0.0279054	0.265767
TCONS_00075510	0.104356	0.573156	-2.43391	0.0279497	0.266147
TCONS_00010033	2.26049	0.379722	2.61813	0.0280229	0.266554
TCONS_00179022	0.114188	0	9.53107	0.0280348	0.266594
TCONS_00031108	0.054709	0	9.60755	0.0280469	0.266672
TCONS_00089946	0.401614	0	9.49629	0.0280535	0.266698
TCONS_00144205	0	0.0740082	-7.84517	0.0280685	0.266803
TCONS_00151688	0.0909143	0	9.52012	0.0282084	0.267577
TCONS_00259705	0	0.180163	-5.26219	0.0282875	0.267868
TCONS_00146073	0.596958	0.0315965	4.47019	0.0283278	0.268158
XR_001434036.1	0	0.00427117	-7.70635	0.0283572	0.268301
XR_001434536.1	0.0923998	0.001518	6.08215	0.0283585	0.268301
XR_001032958.2	0	0.010552	-6.43569	0.0284478	0.268888
TCONS_00232178	1.41235	0.112003	3.81222	0.0285941	0.269826
XR_001436314.1	0	0.0818353	-5.87012	0.0287003	0.270495
TCONS_00254810	0.324281	0	8.16128	0.0287216	0.270622
TCONS_00040324	0.002846	0.203499	-6.27749	0.0287337	0.270625
TCONS_00139536	0.100664	0	7.84267	0.0288743	0.271652
TCONS_00040331	0	0.0889953	-9.27404	0.0289032	0.271775
XR_001045064.2	0	0.110452	-5.98313	0.0289219	0.271876
TCONS_00217160	0	0.0716235	-7.74033	0.0289284	0.271876
TCONS_00237604	0	0.0799522	-8.04286	0.0290703	0.272938
TCONS_00232110	0.305381	0	9.52629	0.0290998	0.273074
TCONS_00038264	3.46288	0.662181	2.45726	0.0291149	0.273109
XR_001435214.1	0	0.00362633	-9.26064	0.0291164	0.273109
TCONS_00186184	0.683972	0.00785617	6.41485	0.029235	0.273886
TCONS_00197624	0.896509	0.0331878	4.53487	0.0292862	0.274159
TCONS_00128924	0.716102	0.034951	4.54822	0.029296	0.274159
XR_001021269.2	0.0736005	0	5.97373	0.0293941	0.274816
TCONS_00024237	0	0.0945942	-9.66927	0.0294498	0.275261
TCONS_00041275	0.0722633	0	9.42494	0.0294912	0.275424
TCONS_00066655	0.237009	1.33165	-2.42232	0.0295216	0.275633
XR_001436442.1	0	0.0097725	-7.60567	0.0295596	0.275951
XR_001433819.1	0.0242728	0	6.04014	0.0295765	0.275996
TCONS_00034128	0.0997448	0	7.91863	0.0296125	0.276208
TCONS_00000138	0	0.169789	-8.20117	0.0296237	0.27625
TCONS_00140163	2.29055	0.337977	2.72148	0.0296393	0.276327
TCONS_00163871	0.0565293	0	6.15667	0.0296504	0.276387
TCONS_00226039	0.384542	0.0107332	5.26149	0.0296702	0.276509
TCONS_00018018	0.167553	0	6.09106	0.0296901	0.276607
XR_001436232.1	0	0.0201713	-4.84349	0.0297215	0.276796
XR_001042486.1	0	0.073515	-5.80578	0.0297265	0.276796
TCONS_00140280	0	0.101034	-8.17655	0.0297742	0.277019
TCONS_00194534	0.180529	0	9.40161	0.0297746	0.277019
TCONS_00040341	0	0.120802	-7.61381	0.0298472	0.277328
TCONS_00063129	0.00267833	0.170487	-6.08269	0.0298484	0.277328
TCONS_00040450	0.158915	0	6.37003	0.0298668	0.277389
TCONS_00036071	0	0.142887	-7.57849	0.030037	0.278371
XR_001436773.1	0.00627367	0	9.39676	0.0300818	0.278599
TCONS_00158809	0	0.155733	-8.19269	0.030163	0.278984
XR_001030584.1	0.0867977	0	7.74693	0.030168	0.278984
XR_001436704.1	0	0.0212867	-7.59158	0.030172	0.278984
XR_001434038.1	0.0158332	0	9.35141	0.0302045	0.27912
TCONS_00096638	0.147728	0	5.07029	0.0302268	0.279196
TCONS_00227822	0.0927552	0.00197083	5.42777	0.0302894	0.279469
TCONS_00152287	0.082127	0	8.09246	0.0303074	0.279598
TCONS_00130884	0	0.0736622	-7.69576	0.0303198	0.279637
TCONS_00138811	0	0.063886	-9.18506	0.0304134	0.2802
TCONS_00082157	3.42171	0.187152	4.2484	0.030469	0.280638
TCONS_00184061	0.147323	0	7.80772	0.0305557	0.281168
XR_001434331.1	0.0116995	0	4.92256	0.0305702	0.281231
TCONS_00197330	0.181909	1.22478	-2.61085	0.0307005	0.281827
TCONS_00219382	0	0.125451	-5.93444	0.0307442	0.282041
TCONS_00258437	0.321192	0.0127153	4.3797	0.0309403	0.283304
TCONS_00052706	0	0.0812758	-9.15439	0.0309477	0.283304
XR_001025398.1	0.0132297	0.381392	-4.16468	0.0309569	0.28331
XR_001436735.1	0.0188518	0	9.32931	0.0310259	0.283726
XR_001435986.1	0	0.021159	-7.52393	0.0310432	0.283726
TCONS_00212441	0.0274405	0.256837	-3.08226	0.0311065	0.284013
XR_001434350.1	0	0.0147898	-7.54158	0.0311292	0.284048
TCONS_00253340	1.67569	0.0776718	4.62216	0.0311302	0.284048
TCONS_00136509	0.358238	0.00146083	5.48578	0.0311573	0.284145
TCONS_00224294	0.247512	0	8.06169	0.0311843	0.284267
TCONS_00223983	0.0781097	0	9.38809	0.0312206	0.284404
TCONS_00043301	0	0.0836823	-9.13401	0.031254	0.284497
TCONS_00185868	0.0422683	0	7.76527	0.0312953	0.284634
TCONS_00079259	0.224019	0.0131502	4.08464	0.0313419	0.284906
XR_001025492.1	0.00152017	0.14887	-6.04304	0.0313667	0.285018
TCONS_00003410	0.0051935	0.154882	-4.43323	0.0314382	0.28548
TCONS_00055997	0	0.153822	-9.53945	0.0315017	0.285835
XR_001434644.1	0.0494853	0.000183333	7.99339	0.0315237	0.285893
TCONS_00133324	0.121276	0	7.76924	0.0315252	0.285893
XR_001435399.1	0	0.0303397	-7.89081	0.0316331	0.28657
TCONS_00184326	0	0.181103	-4.89408	0.0316444	0.286596
TCONS_00160089	0.0395365	0.360242	-3.13885	0.0316475	0.286596
TCONS_00069605	0	0.782302	-9.10444	0.0316659	0.286716
XR_001435353.1	0.0834157	0	5.04247	0.0316927	0.286884
TCONS_00026270	0.0763692	0	6.40658	0.0317426	0.287179
TCONS_00234510	0.0411308	5.11006	-6.83223	0.0317737	0.287239
TCONS_00070684	0	0.0725032	-9.09645	0.0317934	0.287342
TCONS_00076757	0	0.0734093	-7.53993	0.0318964	0.287834
XR_001434402.1	0	0.00487467	-7.48552	0.0319418	0.288128
TCONS_00207854	0.162909	0	6.09071	0.0319431	0.288128
TCONS_00208144	0	0.121875	-9.51292	0.0319693	0.288236
XR_001434035.1	0	0.011037	-9.08247	0.0321017	0.288991
TCONS_00198032	0.837418	0.153247	2.46616	0.0321237	0.289113
XR_001030061.2	0.252467	2.63406	-3.19823	0.0321296	0.289128
TCONS_00154996	0.321647	0	6.12192	0.0321732	0.289332
XR_001024743.2	0.0289635	4.99823	-7.23426	0.0321776	0.289334
TCONS_00234352	0	0.229986	-7.84022	0.0321946	0.289414
TCONS_00064050	0.0869657	0	7.82805	0.0322101	0.289414
TCONS_00233381	0.164782	0	6.02422	0.0322121	0.289414
TCONS_00209237	0.021293	0.261084	-3.62241	0.0322968	0.289764
TCONS_00240965	0.0999732	0	6.13023	0.032375	0.2902
TCONS_00204014	0	0.128418	-8.0159	0.0324486	0.29067
XR_001436135.1	0.0039225	0.0981675	-4.25129	0.0325565	0.291214
XR_001041994.2	0	0.0370372	-7.50906	0.032559	0.291214
TCONS_00013801	1.83134	0.00527083	8.37937	0.0325643	0.291214
TCONS_00164433	0	0.153608	-9.05302	0.0326088	0.291461
TCONS_00255015	0.79459	0.0333443	4.64324	0.0326216	0.291538
TCONS_00185476	0	0.218403	-9.04974	0.032668	0.291766
TCONS_00053067	0.0733463	0	9.21008	0.0326811	0.291766
TCONS_00012504	0.0189447	0.467597	-4.47007	0.0327387	0.292243
TCONS_00047069	0.0549455	1.28045	-4.59295	0.0327891	0.292579
TCONS_00004537	0	0.132609	-7.84419	0.0329081	0.293299
TCONS_00149568	0.0749098	0	7.67678	0.0329266	0.29335
TCONS_00212885	0	0.211327	-7.56531	0.0330574	0.294211
TCONS_00259354	0	0.130957	-5.98227	0.0330799	0.294297
TCONS_00021968	0.008154	0.24539	-4.72649	0.0332163	0.295142
TCONS_00088061	0	0.09899	-7.41138	0.03326	0.295275
TCONS_00072146	0.926158	0.0980848	3.18037	0.0332642	0.295275
TCONS_00030851	0	0.0967977	-9.43968	0.0333007	0.295391
TCONS_00165415	0	0.081983	-9.01992	0.0333058	0.295391
TCONS_00243180	0	0.0847607	-7.61237	0.0333644	0.295794
TCONS_00218091	0.0751412	0	7.62213	0.0334097	0.295896
TCONS_00149207	2.33778	0.483266	2.06225	0.0334591	0.296179
TCONS_00102803	0	0.0685842	-9.01415	0.0334803	0.296328
XR_001030502.2	0	0.002841	-9.00957	0.0335299	0.296539
TCONS_00226058	0.15672	0	5.98266	0.0336334	0.297035
TCONS_00130951	0.146942	0	9.18416	0.033681	0.297283
TCONS_00020990	0.240589	1.28816	-2.36554	0.0338662	0.298402
TCONS_00010142	0	0.087495	-9.39679	0.0339477	0.298963
TCONS_00073762	0	0.10149	-7.42016	0.034117	0.299871
XR_001039023.2	0	0.015775	-8.98184	0.03412	0.299871
TCONS_00122274	0	0.139139	-8.97573	0.034238	0.300422
TCONS_00132486	0.077258	0.000170667	6.85088	0.0342451	0.300422
XR_001042557.2	0	0.0152217	-7.8706	0.0342902	0.300753
XR_001039459.1	0.0208522	0	4.70802	0.0343416	0.300936
XR_001024745.2	0.0289635	3.94694	-6.93818	0.0344095	0.301177
TCONS_00036044	0.160027	0	7.61182	0.0344293	0.301224
TCONS_00134557	0.0510335	0.321458	-2.54817	0.0344871	0.301369
TCONS_00173843	0.101296	0	7.57934	0.0346509	0.3023
TCONS_00131862	0	0.15318	-7.27601	0.0346852	0.30252
TCONS_00231597	0.0210712	9.35e-05	6.12406	0.0346893	0.30252
TCONS_00000433	0.16562	0.005953	4.85491	0.0347078	0.302643
TCONS_00129151	0.109468	0	5.75882	0.0349323	0.304197
TCONS_00242912	0	0.0967733	-8.93077	0.0350099	0.304699
XR_001042176.2	0	0.0482732	-9.32742	0.0350275	0.304737
TCONS_00182253	0.0772448	0	9.1837	0.0350334	0.304744
XR_001436451.1	0.0805217	0	7.64313	0.0350525	0.304744
TCONS_00112997	0.0931377	0	7.98866	0.0351315	0.304921
XR_001434811.1	0	0.00748533	-5.67104	0.0351501	0.304994
XR_001436916.1	0.0639387	0	9.06673	0.03518	0.305061
TCONS_00112081	0	0.060546	-8.91941	0.0351904	0.305082
TCONS_00101444	0.306613	0.012791	3.89468	0.0352958	0.305912
TCONS_00236112	0.00643967	0.215525	-4.78736	0.0353871	0.306511
XR_001040262.2	0	0.019289	-7.24566	0.0354359	0.306768
TCONS_00188330	0.0232108	0	9.08727	0.0354436	0.306768
TCONS_00069454	0.16415	1.34581	-2.87374	0.0355459	0.307298
TCONS_00095943	0	0.118267	-5.51709	0.0355932	0.307599
TCONS_00133553	0.0738195	0	9.04713	0.0356191	0.307669
TCONS_00205398	0.148609	0	9.07609	0.0356369	0.307745
TCONS_00053259	0	0.0292095	-7.22728	0.0356474	0.307795
XR_001435356.1	0	0.0180705	-5.55869	0.0356749	0.307911
XR_001436059.1	0	0.0099995	-8.89609	0.0356784	0.307911
TCONS_00150827	0.163225	0.991253	-2.53892	0.0357771	0.308337
XR_001433858.1	0	0.0135405	-5.4972	0.0357873	0.308338
XR_001434078.1	0.0496795	1.0239	-4.25547	0.0358158	0.308485
TCONS_00144266	0.0350985	0.392266	-3.39434	0.0358166	0.308485
XR_001435687.1	0.001607	0.0447927	-4.43409	0.0359271	0.309089
TCONS_00100408	0	0.0924412	-8.87198	0.0361266	0.31013
TCONS_00234806	0	0.294598	-8.87198	0.0361291	0.31013
TCONS_00112295	0.0989555	0	9.10794	0.0361968	0.310479
TCONS_00043780	0.73875	0.059587	3.70442	0.0362384	0.310565
XR_001435437.1	0	0.0924983	-8.86696	0.0362401	0.310565
TCONS_00009001	0.595402	0.0278103	4.49049	0.0362429	0.310565
TCONS_00141968	0.0365522	0.708049	-4.17007	0.036261	0.310565
TCONS_00147793	0.179438	0.0125733	3.70657	0.0363274	0.310979
TCONS_00193863	0.0138183	0.223083	-4.00701	0.0363482	0.31111
XR_001435136.1	0.0664492	0	9.04203	0.0363517	0.31111
TCONS_00099177	0	0.137206	-8.8588	0.0363947	0.311362
XR_001434235.1	0.0250145	0	7.38242	0.036421	0.31147
TCONS_00107414	1.26117	0.224465	2.5422	0.0364798	0.311819
TCONS_00148094	0.186783	0	7.53752	0.0364915	0.311842
TCONS_00063292	0.0235642	0.460796	-4.17959	0.0365033	0.311884
XR_001021240.2	0.009668	0	5.67748	0.0365614	0.31209
TCONS_00151326	0.313535	0.0217332	3.58699	0.0365912	0.312229
XR_001435219.1	0.0153638	0	5.70662	0.036829	0.313464
TCONS_00225599	0.171135	1.02073	-2.54062	0.0371337	0.315373
TCONS_00045106	0.00280667	0.103634	-5.19662	0.0372026	0.315829
XR_001436829.1	0	0.004209	-8.81663	0.0372894	0.316345
TCONS_00198594	0.0882148	0	9.00321	0.0373366	0.316589
TCONS_00126782	0.0880517	0	7.62708	0.0373938	0.316957
TCONS_00165670	0	0.12676	-5.57899	0.0375606	0.317901
TCONS_00048950	0.0226702	0.241752	-2.88383	0.0375666	0.317913
TCONS_00047202	0.00480383	0.514529	-6.58036	0.0376001	0.318041
TCONS_00026254	0	0.0627092	-8.79822	0.0376052	0.318044
TCONS_00064043	0.085019	0	9.0498	0.0376518	0.318321
TCONS_00049925	0.0328632	0.472676	-3.70951	0.0376643	0.318388
XR_001436921.1	0	0.0349087	-7.0918	0.0376893	0.318547
XR_001023778.1	0.968686	0.178491	2.46462	0.037814	0.319066
TCONS_00182543	0	0.0617158	-8.78008	0.03796	0.31998
TCONS_00219247	0.125487	0	8.95758	0.0379636	0.31998
TCONS_00084242	0.107113	0	7.32617	0.0380342	0.320296
TCONS_00084168	0	0.0893727	-8.77613	0.0380537	0.320395
TCONS_00040965	0	0.0673583	-8.77612	0.0380638	0.320428
TCONS_00132981	0.0750353	0	8.94956	0.0380941	0.320604
XR_001436568.1	0	0.0112052	-7.07993	0.0381539	0.32099
TCONS_00015257	0.163334	0	7.65739	0.0381789	0.321122
TCONS_00231218	0.089431	0	7.68378	0.0381929	0.321161
XR_001039813.2	0	0.002256	-7.05884	0.0382159	0.321277
TCONS_00063291	0.085442	1.0234	-3.57385	0.0382531	0.32151
TCONS_00036791	0.0825977	0.55878	-2.79933	0.0382878	0.321761
TCONS_00232988	0.0964685	0	7.49974	0.0382922	0.321761
TCONS_00171776	0.025192	0.378857	-3.84143	0.0383184	0.321902
TCONS_00258323	12.9881	1.55031	3.0856	0.0383251	0.32192
TCONS_00115952	0.026061	0	7.40833	0.0383356	0.321934
XR_001435233.1	0.0177965	0	8.95521	0.0383362	0.321934
TCONS_00100016	0.0491527	0.646729	-3.64021	0.0384489	0.322588
TCONS_00160075	1.09452	0.130629	3.12469	0.038503	0.322745
XR_001436036.1	0.0236832	9.83333e-05	4.35722	0.0385376	0.322917
TCONS_00175161	0.0737375	0	9.01218	0.0385438	0.32293
TCONS_00125260	0.0318365	0.44018	-3.58312	0.0385629	0.323012
TCONS_00215414	0.530147	3.43111	-2.65871	0.0386708	0.323682
TCONS_00164922	0	0.139304	-5.55782	0.0387435	0.324011
TCONS_00120158	0	0.179024	-7.69028	0.0388004	0.32433
XR_001434232.1	0.0802767	0	7.44475	0.0388338	0.324531
XR_001021634.2	0.00673033	0.257288	-5.23485	0.0388556	0.324635
TCONS_00165367	0	0.0753395	-8.72842	0.0388998	0.324746
XR_001435265.1	0	0.0099995	-7.01822	0.0390373	0.325599
XR_001022179.1	0	0.00716183	-7.01749	0.0390611	0.325719
TCONS_00069604	0.00392317	2.81268	-8.50914	0.0390879	0.325863
TCONS_00159683	0	0.12906	-4.67294	0.0391845	0.326471
TCONS_00154809	0	0.0185943	-9.12038	0.0392345	0.326729
TCONS_00006046	0	0.0691395	-9.12038	0.0392457	0.326783
TCONS_00222935	0.538564	0.0775897	2.70566	0.0393895	0.327723
TCONS_00130406	0.160765	0	4.75691	0.0394188	0.327789
XR_001434661.1	0.013809	0	7.43686	0.0394315	0.327816
TCONS_00220861	0.131276	0	8.89287	0.0394709	0.327945
XR_001434026.1	0.006057	0	7.19409	0.0395431	0.328387
TCONS_00154377	0.307842	0	8.88862	0.03956	0.328487
XR_001041966.2	0.0350468	0	8.96482	0.039626	0.328916
XR_001435306.1	0.0509687	0.00584633	3.24179	0.039698	0.329163
TCONS_00198573	0.118499	0	7.43385	0.0397042	0.329163
TCONS_00255717	0.357898	0.0394932	3.20099	0.0397057	0.329163
XR_001044552.2	0	0.00399017	-6.97537	0.0397168	0.329163
XR_001435829.1	0	0.0204878	-7.43915	0.0397258	0.329163
TCONS_00195432	0.217225	0	7.24183	0.0397339	0.329177
TCONS_00256772	0	0.148797	-5.75099	0.0397931	0.329418
TCONS_00160893	0.439158	0.017887	4.74317	0.0397956	0.329418
TCONS_00237585	0.087834	0.000260667	7.02979	0.0398137	0.329482
XR_001434876.1	0	0.0780797	-7.56045	0.0399054	0.329884
TCONS_00030849	0.0340923	0.506886	-4.01623	0.0399377	0.33008
XR_001435719.1	0	0.0121183	-9.08479	0.0400073	0.330488
TCONS_00112409	0	0.072497	-8.67908	0.0400892	0.330827
TCONS_00165324	0	0.11372	-6.93953	0.0400952	0.330827
TCONS_00009013	0.0215557	0.289142	-3.41428	0.0401757	0.331243
XR_001434698.1	0	0.0023765	-8.67536	0.0401772	0.331243
TCONS_00187454	0.000859167	0.12842	-5.20447	0.040203	0.33131
TCONS_00029878	0.000894167	0.375342	-8.60669	0.0402896	0.331786
TCONS_00183622	0.255011	0.0236487	3.64136	0.0403385	0.33195
TCONS_00037698	0.515501	0.106037	2.40896	0.0403862	0.332185
TCONS_00082661	0	0.0996073	-7.0431	0.0403996	0.332255
TCONS_00075356	0	0.0617898	-8.66503	0.0404085	0.332289
TCONS_00141934	0	0.143914	-7.11294	0.0404785	0.332646
TCONS_00254599	1.02433	0.119189	3.0219	0.0404811	0.332646
TCONS_00100296	0.0787432	0	7.21702	0.0405239	0.3328
TCONS_00062894	0.164535	0	7.22784	0.040565	0.332979
TCONS_00253320	0.132874	0.725343	-2.36489	0.0405751	0.333022
TCONS_00230731	0	0.174074	-7.42044	0.0405951	0.333147
TCONS_00040764	0.0186875	0.220718	-3.55331	0.0406866	0.333739
TCONS_00029905	0.151984	0	7.40124	0.0408453	0.334591
TCONS_00043504	0	0.0893605	-8.64361	0.0408767	0.33474
XR_001021798.2	0.0415203	0	7.48903	0.0409432	0.335125
TCONS_00075170	0.065358	0	8.82772	0.0409539	0.335173
XR_001435028.1	0.15641	0.0253087	2.6402	0.0409701	0.335266
TCONS_00145000	0.152303	0	5.59243	0.0410233	0.335541
TCONS_00239323	0.10631	0	8.82327	0.041039	0.335631
TCONS_00107491	0.0551687	0	8.89302	0.0410808	0.335852
TCONS_00056642	0	0.0780618	-8.63462	0.0411147	0.336013
TCONS_00138060	0.222521	1.29848	-2.43056	0.0411169	0.336013
TCONS_00031008	0	0.135935	-7.41055	0.0411277	0.336013
TCONS_00236174	0	0.203515	-5.45762	0.0411465	0.33607
TCONS_00144813	0	0.154391	-7.37977	0.0412344	0.336669
TCONS_00257515	0.23342	0.0161642	3.5612	0.0413045	0.337161
XR_001044199.2	0.0248938	0.550612	-4.11942	0.0413371	0.337186
TCONS_00166226	0.080062	0	8.88379	0.0413426	0.337186
XR_001041119.2	0.552638	0.0393862	3.94056	0.0413756	0.337376
TCONS_00228106	0	0.10582	-6.89199	0.0414355	0.337551
XR_001022729.1	0.0389567	0	7.30152	0.0414755	0.337756
TCONS_00108339	0	0.043208	-8.6167	0.0415136	0.337953
TCONS_00226594	0.685587	0.025405	4.8654	0.0415287	0.337953
TCONS_00218353	0.000507	0.107512	-5.98084	0.0415389	0.337953
TCONS_00087965	0	0.0704535	-8.60774	0.0416193	0.338224
TCONS_00149327	0.0663943	0.354023	-2.39537	0.041674	0.338493
TCONS_00000970	0.105458	0	7.32676	0.0416919	0.338514
TCONS_00010262	0	0.130943	-6.84846	0.0418696	0.339537
TCONS_00254818	0.194922	0.00798317	4.5622	0.041876	0.339537
TCONS_00211852	0.0117782	0.354478	-5.14388	0.0418776	0.339537
TCONS_00174142	0.017325	0.290258	-3.79334	0.0419801	0.340094
XR_001436345.1	0.045472	0.00214817	3.63099	0.0420513	0.340527
TCONS_00000536	0.1766	0.000999833	7.5642	0.0420644	0.340539
TCONS_00045102	0.00129367	0.054499	-4.95621	0.0421273	0.340888
TCONS_00000673	0.10508	0	8.83281	0.0422334	0.341386
TCONS_00245304	0.0690597	0	8.72792	0.0422834	0.34159
TCONS_00232766	0	0.0836172	-6.96769	0.0423312	0.341724
TCONS_00208996	0.00274	0.182905	-5.94654	0.0423502	0.341768
TCONS_00225600	0.000190333	0.10253	-4.54727	0.0423711	0.341857
TCONS_00215264	0.00514833	0.196563	-4.82497	0.0424464	0.342264
TCONS_00091906	0.294097	0.0183848	4.04488	0.0425137	0.342646
TCONS_00191973	0	0.113909	-6.80855	0.0427015	0.343517
TCONS_00219198	0.191724	0.000265667	6.51878	0.0427129	0.343532
TCONS_00214268	0	0.0773133	-8.56416	0.0427383	0.343652
TCONS_00229622	0.127489	0	8.74544	0.0427661	0.343773
XR_001435020.1	0.00244583	0	8.81747	0.0427882	0.343773
TCONS_00059157	0	0.104268	-5.66341	0.0427982	0.343773
TCONS_00135989	0.203464	0	7.23981	0.0430518	0.345006
TCONS_00088381	0.133781	0	5.31206	0.0431339	0.345379
XR_001435680.1	0.0271437	0	7.1104	0.0431467	0.345379
TCONS_00015275	0	0.0786108	-8.5413	0.0431485	0.345379
TCONS_00025230	0.02014	0.429027	-4.39733	0.0432135	0.345818
TCONS_00136510	0	0.383804	-8.95283	0.0432251	0.345831
TCONS_00069554	0.070118	0	8.68881	0.0432738	0.346027
TCONS_00014579	0	0.155366	-6.80817	0.0432959	0.346138
TCONS_00091032	0.202684	1.54154	-2.95327	0.0433495	0.346186
TCONS_00172174	0.009376	0.362858	-4.49927	0.0433581	0.346186
TCONS_00135563	0.0737457	0	5.42586	0.0433759	0.346273
TCONS_00247751	3.80836	1.2037	1.78679	0.0434128	0.346528
XR_001020856.1	0	0.0850347	-7.23215	0.0435124	0.347001
TCONS_00088645	0.130314	0	8.78313	0.0435952	0.347541
TCONS_00146147	0.0693085	0	8.76989	0.0436176	0.347599
TCONS_00043227	0.16416	0.0145795	3.55857	0.0436332	0.347618
TCONS_00115179	0.185893	0.0214105	3.28508	0.0436494	0.347651
XR_001039312.2	0	0.00359283	-7.26038	0.0436987	0.347872
TCONS_00149160	0	0.114643	-6.88854	0.0437024	0.347872
TCONS_00010155	0.0258723	0.336777	-3.41698	0.0437664	0.34826
TCONS_00210617	2.90161	0.63018	2.28452	0.0437792	0.348282
XR_001435879.1	0	0.13521	-6.75202	0.0438202	0.348528
TCONS_00241669	0	0.270951	-6.73089	0.0439644	0.349432
TCONS_00029184	0.006535	0.242664	-5.33896	0.04403	0.349631
TCONS_00042510	0	0.0620992	-8.50044	0.0440903	0.349868
XR_001042608.1	0.0622565	0	7.27528	0.0441024	0.349924
TCONS_00215077	0.163277	0.00762467	4.40451	0.0442061	0.350527
TCONS_00031327	0.0132798	0.323515	-4.25685	0.044214	0.350527
XR_001434511.1	0.002278	0	7.49973	0.0443152	0.350994
TCONS_00197002	0.0690838	0	8.64454	0.0443978	0.351297
XR_001436058.1	0	0.00237383	-6.72322	0.0445719	0.352269
TCONS_00108887	0.0982858	0	8.66814	0.0445807	0.352285
XR_001435886.1	0.0388293	0	8.63634	0.0446303	0.352528
TCONS_00184847	0	0.0927872	-7.03336	0.0446565	0.352661
XR_001022857.2	0.153358	0.00617217	4.37943	0.0446705	0.352685
XR_001434525.1	0.0571827	0	7.03687	0.0446857	0.352685
TCONS_00025251	0	0.0826937	-8.48008	0.0446904	0.352685
TCONS_00213614	0.138267	0	8.66317	0.0446962	0.352685
TCONS_00091730	0.200103	0	7.22081	0.0447788	0.353215
XR_001435878.1	0.324882	0	8.61981	0.0449782	0.35414
TCONS_00224592	0.0191788	0.378425	-4.13036	0.045091	0.354693
TCONS_00065460	0.045974	0.495091	-3.44633	0.0451969	0.355212
TCONS_00123043	0.0656227	0	8.7041	0.0452292	0.355354
XR_001434077.1	0	0.00908767	-5.15497	0.0453254	0.355956
XR_001433978.1	0.0471322	0	8.6937	0.0454401	0.356409
TCONS_00144276	0.529699	0.00175167	8.58167	0.0454529	0.356409
XR_001044144.2	0.012417	0	8.5982	0.0454718	0.356409
XR_001041248.1	0.0119545	0.0773817	-2.53177	0.0454734	0.356409
XR_001434563.1	0	0.00589483	-5.33985	0.0454921	0.356475
TCONS_00053261	0	0.0687917	-8.44686	0.0455056	0.3565
TCONS_00126312	0	0.107202	-8.44816	0.0455109	0.3565
XR_001434552.1	0	0.0133062	-8.44318	0.0455934	0.357065
TCONS_00072004	0.0039745	0.116728	-5.19301	0.0457355	0.357552
TCONS_00100293	0.165083	0.0113532	3.7191	0.0457654	0.35764
TCONS_00135314	0.0574423	0	8.68558	0.0458679	0.358206
TCONS_00057414	0.0701337	0	8.68558	0.0458691	0.358206
TCONS_00060947	0.100089	0.539394	-2.32464	0.0459338	0.358549
TCONS_00197625	2.90959	0.27431	3.32952	0.0460219	0.358945
TCONS_00149031	0.114758	0	7.06389	0.046035	0.358973
TCONS_00048867	0	0.0679717	-8.42142	0.0460531	0.359039
TCONS_00104493	0.0578282	0	8.59583	0.0460696	0.359039
XR_001044055.2	0.340033	0.0634868	2.38137	0.0462562	0.35968
TCONS_00026671	4.11933	0.822615	2.38804	0.046351	0.360254
TCONS_00094595	0.235065	0	8.59693	0.0464169	0.360589
XR_001027589.2	0.00949867	0.0738048	-2.90051	0.0464933	0.360894
TCONS_00045412	0.0863673	0	8.66418	0.0464962	0.360894
TCONS_00219253	0.0758345	0	8.65136	0.0465555	0.361121
XR_001044410.1	0	0.734939	-8.40267	0.0465863	0.361309
TCONS_00165363	0	0.059916	-8.40018	0.0466439	0.361714
TCONS_00013319	0.100522	0	6.86762	0.0466843	0.361865
TCONS_00218140	0.350546	0.0193835	3.96981	0.0467481	0.362168
XR_001433925.1	0.542358	0.0753613	2.89706	0.0467497	0.362168
TCONS_00060678	0	0.131469	-6.60813	0.0467734	0.36228
XR_001040147.1	0.0477828	0.243207	-2.31643	0.0468495	0.362462
TCONS_00164702	0.104646	0	6.94667	0.0469861	0.363183
TCONS_00211817	0.165417	0	5.38437	0.0472133	0.364298
XR_001021762.2	0	0.00970467	-8.3763	0.047215	0.364298
TCONS_00170798	2.07963	0.325284	2.77909	0.0472926	0.364856
TCONS_00248075	1.17339	0.0202483	5.92021	0.0472985	0.36486
TCONS_00237499	0.0302788	0.435149	-3.72938	0.0473171	0.364911
TCONS_00124927	0.0786383	0	5.34512	0.0474192	0.365546
TCONS_00253436	0.454419	0	8.5546	0.0474901	0.365928
XR_001434101.1	0.00948483	0	8.5328	0.0475293	0.366108
TCONS_00023359	0	0.113561	-7.19772	0.047545	0.366184
TCONS_00134026	0.149821	0.000572833	5.84272	0.0478175	0.367465
XR_001044919.2	0	0.0114788	-6.54074	0.0478315	0.367498
TCONS_00088042	0.0146023	0.270014	-3.86446	0.0479213	0.367996
TCONS_00141377	0.103492	0	8.60362	0.0480164	0.368582
TCONS_00030173	1.57371	0.17007	3.24924	0.0480318	0.368618
TCONS_00025373	0	0.023873	-7.15935	0.0480908	0.368882
TCONS_00093483	0.0459483	0.288971	-2.68631	0.0480954	0.368882
TCONS_00051053	0.017851	0.341854	-3.97605	0.0481161	0.368882
XR_001434192.1	0.217696	0.006252	4.89124	0.0481426	0.369016
TCONS_00136512	0.362766	0	8.52202	0.0481898	0.369197
TCONS_00137199	0	0.0425633	-8.34192	0.048193	0.369197
XR_001044968.1	0.0012915	0.0241913	-4.03533	0.048285	0.369573
TCONS_00041368	0.802601	3.22022	-1.93843	0.0483078	0.369666
TCONS_00166604	0	0.0374428	-6.54733	0.0483372	0.369808
TCONS_00068915	3.68959	0.525005	2.82615	0.048416	0.370041
TCONS_00075810	0.116818	0.576073	-2.28686	0.0485445	0.370843
TCONS_00227824	0.253973	0.0130078	4.32945	0.0485891	0.370953
TCONS_00162639	0.241765	1.97637	-2.94433	0.0486204	0.371068
TCONS_00061227	0.447136	0.0846767	2.3371	0.0486885	0.371465
TCONS_00255309	0.427441	0.0303272	3.89155	0.0488149	0.371914
XR_001025520.2	0.861519	0.0609352	3.8938	0.0488175	0.371914
XR_001434575.1	0.00397933	0	8.57523	0.048846	0.371931
TCONS_00117484	0.844955	0.180905	2.32543	0.0489198	0.372117
XR_001039696.2	0	0.0297497	-6.46877	0.0490137	0.372461
XR_001021411.2	0	0.0598297	-7.13647	0.0490721	0.372708
TCONS_00243170	0	0.169472	-5.23612	0.0491166	0.37282
XR_001435920.1	0	0.0856948	-7.40429	0.0491987	0.373208
TCONS_00216623	0.11629	0	8.48306	0.0492676	0.373623
TCONS_00173071	0.065358	0	8.48306	0.0492797	0.373623
TCONS_00055700	0.0515603	0.379299	-2.83246	0.0493758	0.374263
TCONS_00181418	0.0887025	0	6.91143	0.049493	0.374697
TCONS_00166238	0.116885	0	8.52809	0.0496955	0.375644
TCONS_00177089	0	0.0134887	-6.79108	0.0496997	0.375644
TCONS_00093888	0.0653042	0	8.43367	0.0497134	0.375691
XR_001021257.2	0	0.0211525	-6.9421	0.0497693	0.375871
TCONS_00204185	0.0219178	0.274815	-3.85158	0.0498058	0.375992
TCONS_00152054	0	0.1874	-8.68618	0.0498502	0.37608
TCONS_00132562	0.347386	0.0132103	4.32222	0.0499888	0.376752
TCONS_00140038	0.109499	0	6.87296	0.0500104	0.376752
XR_001024331.2	0	0.00783667	-6.46079	0.0500925	0.377163
TCONS_00013283	0.149645	0	6.88706	0.0502516	0.377868
TCONS_00017350	8.41126	24.4462	-1.498	0.0502573	0.377868
TCONS_00193862	0.0615777	0.555975	-3.22628	0.0503119	0.378144
TCONS_00098756	0.0110682	0.24646	-4.39017	0.0503279	0.378151
XR_001435239.1	0	0.0123282	-5.4896	0.050408	0.378575
TCONS_00051260	0.0428208	0	6.61496	0.0504591	0.378641
XR_001039003.2	0.0292645	0	8.4372	0.0506052	0.379132
TCONS_00039023	0	0.110744	-5.22263	0.0506053	0.379132
TCONS_00227003	0.128427	0.636534	-2.27897	0.0506171	0.379132
TCONS_00194286	0.292364	0.0137663	4.33823	0.0506319	0.379194
TCONS_00079969	0	0.133058	-5.1061	0.0507031	0.379447
TCONS_00159286	0.187106	0	6.72318	0.0507042	0.379447
TCONS_00233326	0.115866	0	6.72868	0.0507276	0.37954
TCONS_00077753	0.236467	0.0144397	3.87654	0.0507851	0.379805
TCONS_00074079	0	0.0614483	-8.22819	0.0509294	0.38043
TCONS_00122155	0	0.0769243	-8.23974	0.0509373	0.380447
TCONS_00244474	0.423112	0.0341462	3.60273	0.0509507	0.380506
TCONS_00136321	0	0.0714388	-8.2107	0.051205	0.381578
XR_001436732.1	0	0.00846983	-8.21192	0.0512167	0.381624
TCONS_00060741	0	0.102523	-6.43596	0.0512963	0.381969
TCONS_00162592	0.0617488	0	6.6703	0.0513755	0.382229
XR_001435210.1	0	0.00173433	-8.19977	0.0514938	0.382406
XR_001436813.1	0	0.0175328	-8.19977	0.0514962	0.382406
XR_001024455.2	0	0.00813867	-6.3511	0.0515477	0.382518
XR_001024059.2	0.223095	0.008317	4.86881	0.0516178	0.382817
TCONS_00076541	0.0573455	0.44453	-2.7757	0.0516715	0.383035
TCONS_00116351	0.0792815	0	8.36091	0.0516866	0.383037
TCONS_00228581	0.682372	0.0606178	3.6795	0.0516966	0.383045
XR_001434753.1	0.0331942	0	6.65447	0.0517152	0.383142
TCONS_00124658	0.258466	0.025077	3.10684	0.0517341	0.383199
TCONS_00217504	0.0240015	0.206341	-2.78682	0.0517979	0.383466
XR_001435906.1	0	0.0130033	-4.33443	0.0518673	0.383856
TCONS_00102621	0.00904033	0.172311	-4.12632	0.0519867	0.384341
TCONS_00057757	0.00862867	0.642057	-5.90764	0.0519908	0.384341
TCONS_00170821	0.660077	0.0113945	5.74104	0.0520099	0.384341
TCONS_00124914	0.0935937	0	5.14955	0.0520133	0.384341
TCONS_00082420	0.0673708	0	8.35092	0.0520175	0.384341
TCONS_00036066	0.236131	1.10178	-2.24668	0.0520759	0.384466
TCONS_00056178	0.0190265	0.282996	-4.07513	0.0521117	0.384616
TCONS_00049953	0.00386833	0.177955	-5.44178	0.0521264	0.384616
XR_001042807.1	0	0.0403752	-4.94695	0.0521845	0.384749
TCONS_00100158	1.82423	0.425688	2.15194	0.052189	0.384749
TCONS_00155841	0	0.080964	-8.16904	0.0522735	0.3851
TCONS_00136005	0.288075	0.0382975	2.70331	0.0522779	0.3851
TCONS_00226423	0	0.0791352	-6.37376	0.0522842	0.3851
TCONS_00133123	0.821083	0.208798	2.09457	0.0522937	0.3851
TCONS_00228469	1.65515	0.0108542	7.30279	0.0523033	0.3851
XR_001436751.1	0	0.00561167	-5.14862	0.052452	0.385985
TCONS_00093978	0.0217317	0.254234	-3.15491	0.0524611	0.38601
TCONS_00126451	0.361379	0.0631697	2.61449	0.0524682	0.38601
TCONS_00001652	0.00368267	0.298997	-4.89005	0.052552	0.386326
TCONS_00000203	0.113638	0	6.71516	0.0526861	0.387005
TCONS_00021386	0	0.097851	-8.15206	0.0527096	0.387095
TCONS_00034539	0.128989	0	8.33763	0.0530212	0.388487
XR_001025027.2	0.004803	0	8.33763	0.0530232	0.388487
XR_001041984.2	0.547134	0.027059	4.46667	0.0530482	0.388588
TCONS_00208817	0.206912	0	6.67632	0.0530617	0.388645
TCONS_00210085	0.00905533	0.200378	-3.70752	0.0530802	0.388716
TCONS_00152454	0.405539	2.70939	-2.59662	0.0530827	0.388716
TCONS_00098639	0	0.0442112	-8.12664	0.0532203	0.389489
XR_001021279.2	0	0.00903133	-8.12664	0.0532221	0.389489
TCONS_00259687	0.0443993	0.334146	-2.67918	0.0532714	0.389686
TCONS_00085045	0.129708	1.50741	-3.31053	0.0532784	0.389686
XR_001044169.1	0.0109262	0.116801	-3.13908	0.053283	0.389686
TCONS_00183113	0.00276467	0.254383	-5.26725	0.053318	0.389818
TCONS_00045204	0	0.0864778	-8.12155	0.0533913	0.390212
TCONS_00227227	0.0261748	0.345799	-3.66791	0.0534154	0.390307
TCONS_00049115	0.0859495	0	8.29959	0.0534504	0.390413
XR_001042127.2	0	0.00785483	-6.28529	0.053622	0.391334
XR_001434646.1	0.0337723	0	6.51064	0.0536609	0.391452
TCONS_00255149	0.391092	0.0256803	3.63964	0.0538154	0.392182
TCONS_00126622	0	0.115567	-5.07761	0.0538179	0.392182
TCONS_00132831	0	0.0650078	-8.09824	0.0538696	0.392352
TCONS_00248521	0	0.118849	-8.10104	0.0539089	0.39243
TCONS_00186215	1.4699	0.0923482	4.18393	0.0539966	0.392903
XR_001035483.1	0	0.014576	-6.28693	0.0540994	0.393526
XR_001022028.2	0	0.0196438	-6.26068	0.0541116	0.39357
TCONS_00075679	0.0700533	0	6.5133	0.0541894	0.393931
XR_001433728.1	0	0.0193173	-8.08849	0.054291	0.394587
XR_001433884.1	0	0.0301565	-6.31555	0.0543368	0.394878
TCONS_00039690	0.0703402	0	8.37239	0.0544146	0.395276
XR_001433847.1	0	0.0129335	-8.07805	0.054503	0.395632
TCONS_00095518	0	0.079797	-6.36616	0.0546164	0.396199
XR_001434598.1	0	0.0203615	-6.3327	0.05463	0.396214
TCONS_00141243	0.0741002	0	6.50883	0.0546892	0.396518
TCONS_00234654	0.139682	0	6.62741	0.0547377	0.396774
TCONS_00131825	0.0309708	0.363978	-3.29924	0.0548054	0.397068
TCONS_00115575	0.255705	0.0328078	2.94752	0.0549243	0.397721
XR_001435194.1	0.014169	0	6.52534	0.0549669	0.397932
TCONS_00036068	0	0.209878	-8.06255	0.0550428	0.398244
TCONS_00090954	0	0.0861265	-5.1578	0.0550513	0.398244
XR_001042459.2	0.0314507	0.281494	-3.22408	0.0550908	0.398337
XR_001024741.2	0	0.0152338	-6.74231	0.0551166	0.398401
XR_001436313.1	0	0.0455558	-5.0623	0.0551775	0.398773
XR_001434143.1	0.0192677	0	6.4401	0.0551797	0.398773
TCONS_00167773	0.0284462	0.175794	-2.40053	0.0552184	0.398937
TCONS_00172951	0.104661	0	8.27069	0.0552371	0.398937
TCONS_00063294	0.0115497	0.225961	-3.93619	0.0552721	0.399036
TCONS_00048689	0.00655167	0.237717	-5.37414	0.0552739	0.399036
TCONS_00123303	0	0.134073	-4.9082	0.0553302	0.399358
TCONS_00238780	0	0.0787597	-6.27834	0.0553814	0.399644
XR_001041893.2	0.0287533	0.00155517	3.59878	0.0554658	0.400044
TCONS_00169747	1.09007	4.81635	-2.20176	0.0556653	0.401006
TCONS_00205163	0	0.181187	-5.09982	0.0556857	0.401006
XR_001023991.1	0.105087	0.50193	-2.19636	0.0558528	0.401934
TCONS_00210243	0	0.150511	-5.02112	0.0558595	0.401934
XR_001436081.1	0.0246583	0	8.25094	0.0559544	0.40222
XR_001435761.1	0	0.0208598	-4.97844	0.0560185	0.402596
TCONS_00183150	0.107255	0.0143022	3.06376	0.0560708	0.402629
TCONS_00162342	0.373624	2.39256	-2.47151	0.0561345	0.402884
XR_001434760.1	0	0.0445893	-8.02806	0.0561849	0.403162
TCONS_00255014	0.378254	0.0179822	4.48125	0.0562008	0.403234
TCONS_00257513	0.490998	0.0800652	2.65321	0.0562295	0.403318
TCONS_00010765	0.191237	0	8.22418	0.05623	0.403318
TCONS_00210697	2.38509	0.454195	2.53455	0.0562765	0.403443
TCONS_00081223	0.665821	0.136113	2.32129	0.0563002	0.403443
TCONS_00081629	0.118584	0	6.95923	0.0563061	0.403443
XR_001043563.2	0.006451	0.0493232	-2.71993	0.0564062	0.403972
TCONS_00198947	0.227561	0.0201282	3.42235	0.0565441	0.404601
TCONS_00180592	0.006108	0.215369	-4.96175	0.0567144	0.405275
XR_001435610.1	0	0.00932817	-6.12126	0.0567281	0.405328
TCONS_00220257	0.298521	0.0578918	2.50029	0.056738	0.405358
XR_001020666.1	0.354713	1.48642	-2.02153	0.0567832	0.405508
XR_001032800.2	0.0278123	0	6.89122	0.0567886	0.405508
TCONS_00137793	0.999201	0.0621457	4.23717	0.0568752	0.406
TCONS_00177878	0.0434117	0.266744	-2.27175	0.0569911	0.406445
TCONS_00075336	0	0.147894	-5.02111	0.0569964	0.406445
XR_001029966.1	0	0.0448762	-5.14382	0.0570078	0.406479
TCONS_00100988	0.09786	0	8.19692	0.057013	0.406479
TCONS_00047099	0.093701	0.464284	-2.17049	0.0570511	0.406708
TCONS_00243747	0.106399	0	6.53883	0.0570636	0.406741
XR_001039032.1	0.12018	0.02312	2.27258	0.0570952	0.406826
XR_001435126.1	0.0263068	0	6.37177	0.0571494	0.40703
TCONS_00153734	0.0923703	0.48262	-2.31043	0.0571751	0.407171
XR_001434555.1	0	0.00937883	-7.99112	0.0572502	0.407431
TCONS_00043252	0.117123	0	4.95937	0.057253	0.407431
TCONS_00145320	0	0.122014	-5.02411	0.0572965	0.407593
TCONS_00210382	0.101004	0	8.26577	0.0572979	0.407593
XR_001436699.1	0	0.00792383	-6.15363	0.05732	0.407613
TCONS_00228582	0.345554	0.0465898	2.80502	0.0574043	0.408002
TCONS_00104763	0.00312617	0.0587165	-4.05232	0.0574163	0.408045
TCONS_00182296	0.288154	0.048218	2.52491	0.0574304	0.408103
TCONS_00121643	0.0371622	0	8.25874	0.0574871	0.408343
XR_001434758.1	0.0750907	0.00206217	5.01053	0.0575312	0.408482
XR_001435316.1	0.223357	3.8361	-4.08706	0.0577302	0.409557
TCONS_00154379	0.186655	0	8.16914	0.0578016	0.409895
TCONS_00136278	0.132475	0.60881	-2.16711	0.0578144	0.409944
TCONS_00176260	0.155683	0.00605	4.71129	0.0579167	0.410542
TCONS_00136511	0	0.257651	-7.96849	0.0580075	0.410932
TCONS_00072796	0.122332	0	8.10842	0.0582727	0.412133
XR_001021824.2	1.7979	0.257792	2.54297	0.0582811	0.41215
TCONS_00159203	1.19794	0.422161	1.59856	0.0584153	0.412845
TCONS_00221166	0.193542	0.00499	5.29363	0.0584349	0.412898
XR_001030469.1	0.0241107	0	8.21937	0.0585503	0.413544
TCONS_00086808	0.204431	0.0306557	2.66502	0.0586856	0.414154
TCONS_00153841	0	0.0561568	-7.94551	0.0587013	0.414186
TCONS_00234538	4.45377	1.53376	1.60383	0.0587922	0.414593
XR_001435784.1	0	0.00483833	-4.92279	0.0588198	0.414682
TCONS_00146284	0.428126	0.0323965	3.87971	0.0588948	0.415041
XR_001433854.1	0	0.0235423	-7.93343	0.0589615	0.415358
TCONS_00190454	0.0907673	0	6.21451	0.0589825	0.415358
XR_001436032.1	0.318887	1.91958	-2.52188	0.0591144	0.415993
TCONS_00057759	0.0831905	0.705194	-3.01278	0.0591769	0.41639
TCONS_00161399	0	0.12318	-6.59175	0.0593707	0.417285
TCONS_00072798	0	0.109877	-7.91768	0.0594031	0.417343
XR_001040125.2	0.00283467	0	8.18971	0.0594558	0.417627
TCONS_00215671	0.276021	0.0165917	4.0398	0.0599869	0.419902
XR_001436727.1	0	0.0656112	-6.05806	0.0600627	0.42039
TCONS_00112998	0	0.108641	-7.89743	0.0600718	0.420394
XR_001436551.1	0.0285288	0	4.89497	0.0600866	0.420394
TCONS_00112568	3.03711	1.03128	1.60915	0.0600891	0.420394
TCONS_00057242	0	0.202977	-6.33442	0.0600935	0.420394
TCONS_00191054	0.276535	1.63767	-2.49571	0.0600938	0.420394
XR_001436830.1	0	0.002258	-7.89779	0.060123	0.42047
TCONS_00000952	0.119612	0	8.07495	0.0602494	0.421082
TCONS_00156863	0.116905	0	8.07495	0.0602532	0.421082
TCONS_00001576	0.126207	0	4.94153	0.0602762	0.421098
TCONS_00235318	0	0.145628	-8.33881	0.0602765	0.421098
TCONS_00081768	0	0.0902742	-6.05492	0.060409	0.421576
XR_001433988.1	0	0.0905513	-6.098	0.060537	0.422187
TCONS_00136892	0	0.126934	-8.3287	0.0606067	0.422355
TCONS_00009014	0	0.254945	-7.8754	0.0607044	0.422948
TCONS_00258883	0	0.145968	-6.05093	0.0607142	0.422973
TCONS_00225187	0.404017	0.0195643	4.53365	0.0607452	0.423018
TCONS_00131034	0	0.0862758	-7.87456	0.0607813	0.423183
TCONS_00079669	0	0.103258	-4.91357	0.0607853	0.423183
TCONS_00180610	0	0.159475	-5.99107	0.060861	0.423611
XR_001044496.1	0.0452732	0.431262	-3.12067	0.0611128	0.424848
TCONS_00155236	0.12077	0	6.26585	0.0611542	0.425024
TCONS_00137809	0.358629	0.021678	4.16777	0.06121	0.425266
XR_001043794.2	0.0392478	0	8.03055	0.0612948	0.425657
TCONS_00004781	0.169329	0.0219117	3.02795	0.0613213	0.425739
XR_001022119.2	0.066985	0.000981333	6.13011	0.0613761	0.425928
TCONS_00165925	0.523862	2.17701	-1.99261	0.0613795	0.425928
TCONS_00185706	0.116985	0	6.25617	0.0613878	0.425943
TCONS_00159782	0.293414	0.0158757	3.97162	0.0614098	0.426026
TCONS_00063402	0	0.0656483	-7.85302	0.06156	0.426793
TCONS_00129111	0	0.0969152	-7.84971	0.0615774	0.426828
TCONS_00258366	0	0.16663	-8.29795	0.0615973	0.426873
XR_001022480.2	0	0.0793838	-4.12534	0.0616326	0.426953
XR_001433709.1	0.00149667	0.06923	-5.67226	0.0616535	0.427012
TCONS_00153025	0.581114	0	8.03702	0.0616832	0.427132
XR_001434301.1	0.00262717	0	8.03702	0.061716	0.427144
TCONS_00036332	0.054709	0	8.10487	0.0617534	0.427274
TCONS_00215412	1.5464	6.99368	-2.13346	0.0619516	0.428044
TCONS_00025954	0.275819	0.0102065	4.82677	0.0620162	0.428312
TCONS_00095940	0.0644203	0	8.08671	0.0620215	0.428312
TCONS_00204777	3.08494	0.740141	2.10897	0.0620923	0.428629
XR_001435930.1	0	0.006557	-4.73087	0.0621686	0.428967
TCONS_00091814	0	0.111064	-7.82791	0.0623026	0.429392
[truncated: 10,758 more rows]
