# Supplementary material for: Non-Coding Transcriptome Provides Novel Insights into the Escherichia coli F17 Susceptibility of Sheep Lamb
Source: Biology (Basel). 2022 Feb 22;11(3):348. doi: 10.3390/biology11030348 (PMC8945857; doi:10.3390/biology11030348)
Supplement: Supplementary file 1 [file biology-11-00348-s001.zip › Supplementary Table S2.xlsx]

## Sheet: Primer information
Table S2: Sequence and designed primers of selected circRNAs and miRNAs
Primer information
Type	ID	Primer sequences (5′ - 3′)		Product Size	Accession
circRNAs	novel_circ_0001331	F	TATGATGGACTTTGGATTACATGAATGAAG	236	Supplementary Table S1: Sequences of selected ncRNAs
		R	GTCAAGATGATGACATATTTCTGCCCGTGG
	novel_circ_0013805	F	CTGAGTGCCAAAGTGGTTGCCATAGTGTCT	128
		R	TTATTTCGATGCCCCCAAACTACATTCATG
	novel_circ_0022393	F	ATACGTGGGATACACAAATGAACTCTAATC	186
		R	CACATCTTTCTGTAAAAGCTCTATGGAACT
	novel_circ_0022779	F	GAGCAGCCTTTTAATTTGATTACATTCAGA	214
		R	GGACACCGTGAGAGAATATAATAAACCCCA
	novel_circ_0025840	F	GGAGATAAAGCTATGCTTGGGATACAAATG	164
		R	AGGATCAGTAACTACAAACCAGAACGACAC
miRNAs	oar-miR-10b	F	GCGACCCTGTAGAACCGAA
		R	AGTGCAGGGTCCGAGGTATT
	oar-miR-200b	F	GCGCGTAATACTGCCTGGTA
		R	AGTGCAGGGTCCGAGGTATT
	novel_miR_16	F	GCGCGTAAAGTGCTTATAGTGC
		R	AGTGCAGGGTCCGAGGTATT
	novel_miR_56	F	CGCGTGAGAACTGAATTCCA
		R	AGTGCAGGGTCCGAGGTATT
	novel_miR_107	F	CGAGGCAAGATGCTGGCA
		R	AGTGCAGGGTCCGAGGTATT
Reference gene	GAPDH	F	CAGGAGCACGAGAGGAAGAGAGA		NM_001190390.1
		R	CAGGGCCTTGAGGATGGAAATGT
	U6	F	TGGAACGATACAGAGAAGATTAGCA
		R	AGTGCAGGGTCCGAGGTATT

## Sheet: Sequences of selected ncRNAs
>novel_circ_0001331
GACACACAAATCACTGATATTGACTATATGGAAGACAAGAAAATCTTTACTTATGATCAAGTTGCATTTAACGgcctcccagaatttgttcaagaTTTGCATGCCCACGGGCAGAAATATGTCATCATCTTGACCCTGCAGTTTCCATAGACAAACGTGTGAATGGGACAGCATATGAGTCCTATGATAGGGGAACTGCCCAAAAGGTGTGGGTAAATGAGTCAGATGGGACTACAGCCATTATTGGAGAGTATGGCCAGGATTAACAGTATACCCTGATTTCACAAATCCAagttgcatagaatggtgggcaAATGAATGCTACCTTTTTCATCAACAAGTAAATTATGATGGACTTTGGATTACATGAATGAAGTTTCCAGCTTTGTTCAAGGTTCA…
>novel_circ_0013805
aacaagaaaaatataaCTCATCCACAAAATTTTAAAGAGCCCATGAATGTAGTTTGGGGGCATCGAAATAATGATATAAGAAGATCAAAACAGAACCAGAAATTAAAAGGCTTCACAAGCTTAGTAGTGGAGGAGCGAACGAgacagatgaaaatgaaagtgcatcGATTTAAGCAGACAACAGGGTCTGGTTCTAGTCAAGAACTTGATCGCGAGCAGTATTCCAATATAGCGCACACACAGATCAGTACAGAAGCTGCGACAACGTCTCCGCCAGATCCTCAGACAGCGACGTCAGCGACGCGTCTGCCGTGTCCCGAACCAGCAGTGCCTCCCGCCTCAGCAGCACCAGCTTCCTGTCCGAGCAGTCTGAGCGGCCTCGGGGCAGGATCATTCATT…
>novel_circ_0022393
aagaaaaaatcaGCACTTTTTGAAGTGTCTGAGGTTATACCAGTTATGACAAATAATTATGAAGAAAATATCCTGAAAGGTGTGCAAGACTCCAGTTATTCCTTGGAAAGTTCCATAGAGCTTTTACAGAAAGATGTGGTGCAGCTCCATGCTCCTCGATACCAGTCTATGAGAAGGttaCCAAATGTGGTGGTTTACCCAACAACATTTTGGATGTCTGGGAGTTTTTGGGCAAACCTAAGCATTGCCAGTATACGTGGGATACACAAATGAACTCTAATCTTGGAATAGCTGCTACTT
>novel_circ_0022779
GTTTATTATATTCTCTCACGGTGTCCTTTTGGCATGGAGGATGGGAAGAAAAGGTTTGGCATTGAAAGACTGCTAAATTCTAACACTTACTCATCTGCCTTTCCACTCCATGAGGTCAATATTGGAAGGCATCAGAACCTCCTAATCCTGTCAATCAAAGGAACATACTCTACCAGAACTGGGCTcggttttcttatttttacaagGAGCAGCCTTTTAATTTGATTACATTCAGATCTGTGACCCTGAGATTGGGGGTCAGATTATCATGTGCCCACTCTGTGATGAACTGTGTGACTATTGGAGGCTAAATTCAACCTGTTTGGCTTCTAAATCTCCCATTTATTTGACAATGAGTCAACTGTGTTCTTTGCCATTTTCATGGGAATTTGGG
>novel_circ_0025840
GATTTCCCATGTCCTGCTTTGCAATGTAACACAGCGGGTGTCGTTCTGGTTTGTAGTTACTGATCCTTCAAGAAATCACACCCTTCCTGCTGTTGAGGTACAGTCAGCCATCAatgcagaaaatgcttttaaagtgAGACTTAGTATCAGAACAGCCCTGGGAGATAAAGCTATGCTTGGGATACAAATGAAGAGTATCTCTTCAAAGCAATGGTGGCTTTCTCCATGAGAAAAGTTCCCAACAGAGAAACAACTGA
>oar-miR-10b
ACCCUGUAGAACCGAAUUUGUG
>oar-miR-200b
UAAUACUGCCUGGUAAUGAUG
>novel_miR_16
UaaagUgcUUaUagUgcaggUag
>novel_miR_56
UgagaacUgaaUUccaUaggUU
>novel_miR_107
aggcaagaUgcUggcaUagcUg
