# Supplementary material for: Non-Coding Transcriptome Provides Novel Insights into the Escherichia coli F17 Susceptibility of Sheep Lamb
Source: Biology (Basel). 2022 Feb 22;11(3):348. doi: 10.3390/biology11030348 (PMC8945857; doi:10.3390/biology11030348)
Supplement: Supplementary file 1 [file biology-11-00348-s001.zip › Supplementary Table S3.xlsx]

## Sheet: DE analysis of circRNA
Table S3: Differentially expressed analysis results of circRNAs and miRNAs
ID	AN_readcount	SE_readcount	log2FoldChange	pval	padj
novel_circ_0000001	1.49229	0.331762	1.9399	0.40673	NA
novel_circ_0000002	0	0.360622	-0.73621	0.81255	NA
novel_circ_0000003	10.0286	8.80877	0.22931	0.70231	0.96643
novel_circ_0000004	0	0.234887	-0.41502	0.8939	NA
novel_circ_0000006	0.520066	0.517214	-0.14042	0.95921	NA
novel_circ_0000008	4.36721	3.37135	0.29947	0.72296	0.97181
novel_circ_0000009	6.33955	7.2164	-0.18132	0.76014	0.97874
novel_circ_0000010	1.82554	2.53685	-0.4063	0.73662	0.97486
novel_circ_0000011	16.2915	29.2732	-0.82826	0.035377	0.33762
novel_circ_0000014	4.31614	4.63012	-0.089691	0.93002	0.99845
novel_circ_0000017	0.249868	0.989794	-1.1941	0.64734	NA
novel_circ_0000018	0.85961	0.499955	1.0325	0.7116	NA
novel_circ_0000019	26.36	37.3027	-0.47483	0.11934	0.6135
novel_circ_0000020	0	1.77143	-2.9172	0.15933	NA
novel_circ_0000021	0	0.234887	-0.41502	0.8939	NA
novel_circ_0000023	0	0.482861	-1.029	0.73937	NA
novel_circ_0000024	0	0.663525	-1.5183	0.62074	NA
novel_circ_0000026	1.37768	2.43772	-0.7001	0.63459	0.95127
novel_circ_0000027	69.6941	93.1718	-0.41381	0.034379	0.33265
novel_circ_0000028	14.278	13.3416	0.062748	0.88581	0.98993
novel_circ_0000030	0	2.0393	-3.1263	0.14738	NA
novel_circ_0000031	0.249868	4.82074	-3.4427	0.012341	0.18324
novel_circ_0000032	0	0.663525	-1.5183	0.62074	NA
novel_circ_0000033	1.1531	0.921304	0.35878	0.85946	NA
novel_circ_0000034	0.429805	1.83812	-1.6831	0.40032	NA
novel_circ_0000035	2.00477	0	3.8369	0.1456	NA
novel_circ_0000036	0.58003	0.553598	0.2294	0.93184	NA
novel_circ_0000037	16.6338	14.1366	0.28259	0.56526	0.93991
novel_circ_0000041	0.716342	0	2.5243	0.41429	NA
novel_circ_0000042	3.33125	2.91365	0.22926	0.81766	0.98881
novel_circ_0000043	1.57553	0.646486	1.2759	0.52367	NA
novel_circ_0000044	0	0.965197	-2.0502	0.45761	NA
novel_circ_0000045	0	0.723638	-1.6096	0.59943	NA
novel_circ_0000046	0.85961	2.56452	-1.3834	0.35852	0.86875
novel_circ_0000047	1.16006	0.803078	0.53839	0.81291	NA
novel_circ_0000048	0.286537	0	1.7347	0.57724	NA
novel_circ_0000049	0.572792	0	1.8063	0.56141	NA
novel_circ_0000050	2.99585	0.313183	2.9947	0.066637	0.46283
novel_circ_0000051	6.095	3.97716	0.65483	0.3524	0.86584
novel_circ_0000054	0.286537	0.391479	0.093331	0.97594	NA
novel_circ_0000055	0	0.313183	-0.64746	0.83495	NA
novel_circ_0000056	0	0.833829	-1.8569	0.5433	NA
novel_circ_0000057	11.6861	7.99399	0.55126	0.29893	0.82813
novel_circ_0000059	0.712187	0.69095	-0.58622	0.81443	NA
novel_circ_0000060	1.37968	1.33967	0.10687	0.95147	NA
novel_circ_0000063	0.780099	0	2.5467	0.41004	NA
novel_circ_0000064	7.05067	19.6499	-1.368	0.014917	0.20538
novel_circ_0000066	0	0.480829	-1.0532	0.73342	NA
novel_circ_0000067	14.1176	22.2818	-0.63081	0.21112	0.76257
novel_circ_0000068	0.520066	1.30006	-1.4424	0.53626	NA
novel_circ_0000069	0.429805	0.240415	1.0522	0.7345	NA
novel_circ_0000070	0.716342	0	2.5243	0.41429	NA
novel_circ_0000071	0.386687	0	1.8063	0.56141	NA
novel_circ_0000074	0	0.397369	-0.8262	0.78991	NA
novel_circ_0000075	55.6288	70.5417	-0.33865	0.16766	0.70862
novel_circ_0000076	4.01306	7.7562	-1.0186	0.25513	0.80406
novel_circ_0000082	0.386687	0	1.8063	0.56141	NA
novel_circ_0000083	0.249868	1.31732	-1.6413	0.4989	NA
novel_circ_0000084	2.81211	4.51107	-0.57834	0.50238	0.92552
novel_circ_0000085	1.14558	0	3.0223	0.32522	NA
novel_circ_0000086	0.386687	0.331762	0.37187	0.90454	NA
novel_circ_0000087	4.98456	3.07834	0.60158	0.53713	0.93189
novel_circ_0000088	0	0.548071	-1.2829	0.67702	NA
novel_circ_0000090	1.05447	0.240415	2.0298	0.42156	NA
novel_circ_0000091	0	0.313183	-0.64746	0.83495	NA
novel_circ_0000092	1.15282	1.73326	-0.65075	0.70561	NA
novel_circ_0000093	0	0.912125	-1.9854	0.51516	NA
novel_circ_0000094	2.43665	0.644946	1.8305	0.27185	0.81696
novel_circ_0000095	0	0.221175	-0.22477	0.94246	NA
novel_circ_0000096	0	0.234887	-0.41502	0.8939	NA
novel_circ_0000101	0	0.156592	-0.13772	0.96473	NA
novel_circ_0000103	0	0.666606	-1.4692	0.63233	NA
novel_circ_0000104	3.40067	5.09152	-0.49384	0.58747	0.94237
novel_circ_0000105	0.85961	0	2.7326	0.3756	NA
novel_circ_0000106	8.40289	5.29928	0.61266	0.37673	0.87118
novel_circ_0000109	1.28942	0	3.271	0.28066	NA
novel_circ_0000110	1.57595	0	3.5586	0.20893	NA
novel_circ_0000113	1.52294	3.05213	-0.92812	0.43476	0.89662
novel_circ_0000115	2.04273	1.47534	0.38779	0.79692	0.98759
novel_circ_0000116	0	0.360622	-0.73621	0.81255	NA
novel_circ_0000117	0	0.397369	-0.8262	0.78991	NA
novel_circ_0000118	0	0.264913	-0.22477	0.94246	NA
novel_circ_0000119	1.51109	0	3.5086	0.17549	NA
novel_circ_0000120	0.716342	0.815673	0.0027457	0.99919	NA
novel_circ_0000121	61.8759	56.8772	0.1316	0.71371	0.96798
novel_circ_0000122	0.286537	1.2519	-1.4804	0.50246	NA
novel_circ_0000123	0	0.313183	-0.64746	0.83495	NA
novel_circ_0000124	0	0.469775	-1.0715	0.72889	NA
novel_circ_0000125	1.42437	0	3.3044	0.26242	NA
novel_circ_0000126	7.2296	0.977757	2.9323	0.0043687	0.098587
novel_circ_0000128	2.6642	0.88536	1.5901	0.27337	0.81696
novel_circ_0000132	1.23399	0.360622	1.6547	0.4926	NA
novel_circ_0000137	5.68268	8.96695	-0.55602	0.37889	0.87118
novel_circ_0000138	2.14072	0.775653	1.432	0.4463	NA
novel_circ_0000139	3.97081	3.82346	0.11899	0.88618	0.98995
novel_circ_0000141	0.520066	0	1.8063	0.56141	NA
novel_circ_0000142	0	1.43114	-2.6166	0.27808	NA
novel_circ_0000143	3.65158	1.61712	1.1647	0.34592	0.86168
novel_circ_0000146	0	0.554478	-1.2236	0.69146	NA
novel_circ_0000149	0.249868	0.944813	-1.1129	0.644	NA
novel_circ_0000150	3.82817	7.82575	-0.89473	0.32796	0.84618
novel_circ_0000151	0.95976	1.40966	-0.48225	0.78833	NA
novel_circ_0000152	0.249868	0.666606	-0.58792	0.84804	NA
novel_circ_0000155	0	1.14311	-2.2865	0.42764	NA
novel_circ_0000159	0.429805	7.14674	-3.5978	0.0069161	0.13133
novel_circ_0000162	0	2.13482	-3.1671	0.1841	NA
novel_circ_0000163	0	0.794738	-1.7578	0.5655	NA
novel_circ_0000165	0.374802	0	1.9491	0.53048	NA
novel_circ_0000166	0	0.87434	-1.9138	0.53076	NA
novel_circ_0000167	0.624669	0	2.4011	0.43793	NA
novel_circ_0000169	0.374802	0.911399	-0.76901	0.74474	NA
novel_circ_0000171	0.499735	1.5284	-1.2609	0.53809	NA
novel_circ_0000174	1.66081	6.31323	-1.6843	0.093082	0.54762
novel_circ_0000175	0.624669	0.897324	-0.25726	0.9167	NA
novel_circ_0000176	0	0.626366	-1.4691	0.63234	NA
novel_circ_0000177	0.716342	1.30403	-0.67129	0.74606	NA
novel_circ_0000178	0.249868	2.31671	-2.4245	0.20958	NA
novel_circ_0000179	0	0.331762	-0.6655	0.83039	NA
novel_circ_0000180	8.74568	2.30698	1.9231	0.012223	0.18269
novel_circ_0000181	28.9075	22.6898	0.3828	0.2463	0.796
novel_circ_0000182	0	0.489404	-0.95906	0.75671	NA
novel_circ_0000185	0.906753	0	2.7451	0.37334	NA
novel_circ_0000186	0.386687	1.41524	-1.5891	0.45148	NA
novel_circ_0000191	1.19129	3.45632	-1.3593	0.24703	0.79638
novel_circ_0000193	0.716342	2.72134	-1.7003	0.30536	0.835
novel_circ_0000194	3.73985	3.13752	0.2868	0.7872	0.98467
novel_circ_0000195	3.23174	7.19504	-1.1374	0.11481	0.6026
novel_circ_0000196	2.14023	1.33103	0.65451	0.82482	0.98881
novel_circ_0000197	1.6211	1.11512	0.62564	0.69233	NA
novel_circ_0000198	4.85363	4.23735	0.17994	0.84289	0.98881
novel_circ_0000199	1.86452	2.88878	-0.50339	0.66257	0.95715
novel_circ_0000200	1.04013	1.79274	-0.85138	0.59784	NA
novel_circ_0000201	0	0.794013	-1.7807	0.56032	NA
novel_circ_0000202	5.5492	5.65438	-0.059405	0.94734	0.99845
novel_circ_0000203	0.374802	0.986988	-0.91957	0.71661	NA
novel_circ_0000207	0.85961	0	2.7326	0.3756	NA
novel_circ_0000208	0.499735	0	2.1924	0.47961	NA
novel_circ_0000209	2.19675	1.41208	0.60878	0.68594	0.96464
novel_circ_0000210	0.429805	0.839356	-0.58252	0.80547	NA
novel_circ_0000211	1.45332	2.5273	-0.81734	0.54254	0.93524
novel_circ_0000213	11.5677	7.47539	0.63562	0.22877	0.78013
novel_circ_0000215	0	1.01065	-2.1093	0.4833	NA
novel_circ_0000217	0	0.489404	-0.95906	0.75671	NA
novel_circ_0000218	0	1.34411	-2.5386	0.35343	NA
novel_circ_0000219	1.03614	1.81156	-0.68483	0.68852	NA
novel_circ_0000220	0.58003	4.26243	-2.6927	0.037395	0.34682
novel_circ_0000221	0	0.156592	-0.13772	0.96473	NA
novel_circ_0000222	1.96208	4.31445	-1.1528	0.30569	0.83516
novel_circ_0000224	7.84543	9.51609	-0.2288	0.74201	0.97621
novel_circ_0000225	10.6227	16.6904	-0.62352	0.2165	0.76721
novel_circ_0000228	0	0.44235	-0.9701	0.75397	NA
novel_circ_0000229	0	0.631894	-1.4656	0.63318	NA
novel_circ_0000234	0.929541	2.92203	-1.4516	0.31815	0.84145
novel_circ_0000236	0.58003	0	2.2883	0.46021	NA
novel_circ_0000237	4.69773	4.92291	-0.14221	0.84985	0.98881
novel_circ_0000238	0	1.40153	-2.5884	0.28509	NA
novel_circ_0000239	6.24606	9.71378	-0.62251	0.29214	0.82083
novel_circ_0000241	18.941	17.0053	0.20412	0.60609	0.94722
novel_circ_0000242	1.71866	0.234887	2.4342	0.28413	NA
novel_circ_0000247	0.429805	0	2.046	0.50999	NA
novel_circ_0000248	0	0.264913	-0.22477	0.94246	NA
novel_circ_0000249	0.386687	0.728769	-0.63853	0.79312	NA
novel_circ_0000251	0.773374	1.23063	-0.57093	0.78327	NA
novel_circ_0000252	6.18733	3.89847	0.69206	0.35669	0.86808
novel_circ_0000253	95.4821	93.8979	0.043658	0.86565	0.98881
novel_circ_0000254	0.429805	2.11938	-1.8611	0.3019	NA
novel_circ_0000255	0	0.234887	-0.41502	0.8939	NA
novel_circ_0000257	0	0.662281	-1.494	0.62647	NA
novel_circ_0000259	4.09758	2.75904	0.49241	0.6554	0.9563
novel_circ_0000260	2.2802	1.78845	0.25899	0.88153	0.98993
novel_circ_0000261	1.77957	1.10354	0.75804	0.66174	NA
novel_circ_0000262	0.85961	1.52351	-0.68133	0.70756	NA
novel_circ_0000264	23.6742	25.484	-0.078069	0.85107	0.98881
novel_circ_0000265	0.249868	0	1.6503	0.59614	NA
novel_circ_0000266	0	0.313183	-0.64746	0.83495	NA
novel_circ_0000267	1.24587	1.08276	0.15293	0.93903	NA
novel_circ_0000269	7.29144	9.91916	-0.44786	0.47618	0.91665
novel_circ_0000270	0.573074	2.64656	-1.9331	0.2948	0.82426
novel_circ_0000271	0.429805	1.46608	-1.3808	0.50855	NA
novel_circ_0000272	1.04013	0.44235	1.155	0.67071	NA
novel_circ_0000274	0	0.156592	-0.13772	0.96473	NA
novel_circ_0000275	0.886422	0.221175	1.7841	0.50419	NA
novel_circ_0000276	5.29115	2.76052	0.98408	0.27618	0.81696
novel_circ_0000277	1.57798	2.62739	-0.60979	0.64549	0.95286
novel_circ_0000278	0	1.58742	-2.7478	0.19766	NA
novel_circ_0000279	11.8129	11.3593	0.025101	0.96224	0.99914
novel_circ_0000280	0.679673	0	2.4752	0.42366	NA
novel_circ_0000281	0.249868	0	1.6503	0.59614	NA
novel_circ_0000282	0.249868	0.662281	-0.61269	0.84166	NA
novel_circ_0000284	3.11805	1.32007	1.2073	0.40062	0.88613
novel_circ_0000285	10.9273	3.14619	1.7657	0.021372	0.25643
novel_circ_0000286	0	0.221175	-0.22477	0.94246	NA
novel_circ_0000287	0	0.529825	-1.1709	0.70438	NA
novel_circ_0000288	0	0.897324	-1.9191	0.52959	NA
novel_circ_0000289	2.10056	2.35701	-0.16338	0.88083	0.98993
novel_circ_0000292	0.874537	0.360622	1.2688	0.65797	NA
novel_circ_0000294	1.10906	2.28169	-1.085	0.48497	0.92096
novel_circ_0000295	0	0.234887	-0.41502	0.8939	NA
novel_circ_0000296	1.30017	1.78287	-0.4972	0.80672	0.98881
novel_circ_0000300	0	0.360622	-0.73621	0.81255	NA
novel_circ_0000301	0.712187	0	1.8063	0.56141	NA
novel_circ_0000302	4.67752	6.06985	-0.41534	0.64274	0.95181
novel_circ_0000303	0	1.28291	-2.4629	0.37379	NA
novel_circ_0000304	0.58003	0.975465	-0.55677	0.81891	NA
novel_circ_0000305	0	0.234887	-0.41502	0.8939	NA
novel_circ_0000306	0.573074	0.221175	1.3144	0.6711	NA
novel_circ_0000307	0	0.568191	-1.2765	0.67856	NA
novel_circ_0000308	0	0.156592	-0.13772	0.96473	NA
novel_circ_0000309	5.68725	4.67422	0.31195	0.70441	0.96713
novel_circ_0000312	1.932	3.04011	-0.61691	0.58436	0.9417
novel_circ_0000313	0.998724	2.88196	-1.7526	0.24371	0.7918
novel_circ_0000314	0	0.475302	-1.062	0.73124	NA
novel_circ_0000318	0	1.31867	-2.4998	0.3616	NA
novel_circ_0000319	1.2099	1.19218	-0.0008907	0.99957	NA
novel_circ_0000320	1.79918	1.01065	0.7558	0.69052	NA
novel_circ_0000321	24.719	28.4685	-0.19627	0.62508	0.95018
novel_circ_0000322	0.573074	0.360622	0.80295	0.79471	NA
novel_circ_0000323	0	0.662281	-1.494	0.62647	NA
novel_circ_0000324	1.05991	1.11861	-0.027426	0.98922	NA
novel_circ_0000325	0.573074	0.841451	-0.30725	0.91143	NA
novel_circ_0000326	0	0.552937	-1.2582	0.68302	NA
novel_circ_0000327	1.935	2.27405	-0.26168	0.85898	0.98881
novel_circ_0000331	16.4392	23.7833	-0.49706	0.24216	0.79104
novel_circ_0000333	0	0.360622	-0.73621	0.81255	NA
novel_circ_0000334	2.97247	4.53594	-0.53659	0.63788	0.95181
novel_circ_0000337	3.6233	6.73427	-0.82727	0.2757	0.81696
novel_circ_0000339	1.53987	4.00931	-1.3543	0.26925	0.81663
novel_circ_0000340	0.949871	3.21241	-1.6907	0.26208	0.80936
novel_circ_0000343	0	0.240415	-0.22477	0.94246	NA
novel_circ_0000344	0	0.377766	-0.81203	0.79347	NA
novel_circ_0000345	2.04977	1.02045	0.97817	0.55933	0.93991
novel_circ_0000346	0.520066	1.68252	-1.8088	0.37097	NA
novel_circ_0000347	1.14818	1.67427	-0.44138	0.78217	NA
novel_circ_0000348	11.1411	12.4944	-0.23407	0.64044	0.95181
novel_circ_0000349	0.249868	2.43472	-2.4712	0.12798	NA
novel_circ_0000350	0.386687	0.397369	0.21117	0.9456	NA
novel_circ_0000351	97.1714	93.8654	0.033653	0.88622	0.98995
novel_circ_0000353	1.27311	1.05289	0.35255	0.85846	NA
novel_circ_0000354	21.4996	12.0525	0.85074	0.056129	0.42515
novel_circ_0000355	0.624669	0.331762	0.96666	0.75408	NA
novel_circ_0000356	0.822659	0.865949	-0.071925	0.97377	NA
novel_circ_0000358	0	0.529825	-1.1709	0.70438	NA
novel_circ_0000359	0.249868	1.46401	-1.7254	0.38627	NA
novel_circ_0000360	0	1.01923	-2.1074	0.48353	NA
novel_circ_0000361	0	1.64642	-2.8296	0.21704	NA
novel_circ_0000362	3.5011	1.4045	1.4046	0.23931	0.78942
novel_circ_0000363	0	0.264913	-0.22477	0.94246	NA
novel_circ_0000364	0.624669	3.44689	-2.1488	0.17289	0.71692
novel_circ_0000365	32.0927	0	7.8774	8.5734e-15	5.3593e-12
novel_circ_0000366	21.1526	0	7.276	1.9891e-12	7.771e-10
novel_circ_0000367	26.7165	0	7.6035	1.2508e-13	5.585e-11
novel_circ_0000370	7.23659	0	5.7137	5.1487e-05	0.0033525
novel_circ_0000371	0.58003	0	2.2883	0.46021	NA
novel_circ_0000372	2.76613	0	4.3568	0.026008	NA
novel_circ_0000379	1.23399	0	3.1584	0.25595	NA
novel_circ_0000381	0.749603	0	2.5847	0.4029	NA
novel_circ_0000385	0.249868	0	1.6503	0.59614	NA
novel_circ_0000386	3.6847	0	4.7583	0.0036508	0.088112
novel_circ_0000388	0	0.480829	-1.0532	0.73342	NA
novel_circ_0000389	0	0.221175	-0.22477	0.94246	NA
novel_circ_0000390	0	0.644946	-1.4937	0.62654	NA
novel_circ_0000392	0	0.234887	-0.41502	0.8939	NA
novel_circ_0000393	0	0.965721	-2.0379	0.50388	NA
novel_circ_0000394	0.947875	0.740369	0.51389	0.81257	NA
novel_circ_0000400	0	0.331762	-0.6655	0.83039	NA
novel_circ_0000401	0	0.529825	-1.1709	0.70438	NA
novel_circ_0000402	5.16431	4.88959	0.15896	0.83453	0.98881
novel_circ_0000403	0.573074	0.626366	0.067121	0.98151	NA
novel_circ_0000404	0	1.18179	-2.3282	0.3667	NA
novel_circ_0000407	0	2.04006	-3.1268	0.14883	NA
novel_circ_0000408	1.68255	2.71742	-0.57141	0.68792	0.96513
novel_circ_0000409	18.4219	17.9521	0.026576	0.94647	0.99845
novel_circ_0000410	2.36503	4.09186	-0.77874	0.47016	0.91486
novel_circ_0000416	0.749603	1.49554	-0.79797	0.71751	NA
novel_circ_0000417	11.7762	6.56175	0.81862	0.25243	0.80128
novel_circ_0000418	5.35736	3.68499	0.5954	0.53415	0.93005
novel_circ_0000420	2.14903	0.99991	1.1983	0.58779	0.94237
novel_circ_0000421	0	1.45879	-2.6218	0.27901	NA
novel_circ_0000422	0.96621	2.81672	-1.3523	0.31908	0.84145
novel_circ_0000423	46.8592	33.0895	0.51523	0.13844	0.65315
novel_circ_0000426	0	0.156592	-0.13772	0.96473	NA
novel_circ_0000427	0.58003	0	2.2883	0.46021	NA
novel_circ_0000428	0	0.221175	-0.22477	0.94246	NA
novel_circ_0000430	0	0.729131	-1.6422	0.59187	NA
novel_circ_0000431	0	0.333303	-0.22477	0.94246	NA
novel_circ_0000433	21.3713	19.4509	0.099554	0.85778	0.98881
novel_circ_0000435	0	0.333303	-0.22477	0.94246	NA
novel_circ_0000436	1.00288	2.36869	-1.0915	0.5076	0.92844
novel_circ_0000439	1.14615	0.944813	0.38662	0.85091	NA
novel_circ_0000441	3.94375	1.46515	1.5043	0.26135	0.80936
novel_circ_0000442	0.906753	2.99801	-1.7621	0.23715	0.78857
novel_circ_0000443	0.499735	1.88536	-1.5357	0.39874	NA
novel_circ_0000444	8.51862	19.6945	-1.1752	0.052382	0.41114
novel_circ_0000446	2.37028	1.57634	0.59903	0.65622	0.9563
novel_circ_0000447	0.573074	0.595509	0.16671	0.94987	NA
novel_circ_0000448	16.9231	13.8318	0.30259	0.5491	0.93524
novel_circ_0000449	4.54809	5.06697	-0.1169	0.88411	0.98993
novel_circ_0000451	0.85961	0.44235	0.99896	0.72307	NA
novel_circ_0000454	0	0.44235	-0.9701	0.75397	NA
novel_circ_0000458	7.25658	11.0141	-0.66082	0.26421	0.81118
novel_circ_0000460	0	1.32705	-2.5103	0.40837	NA
novel_circ_0000461	1.48556	0.764712	0.88899	0.65778	NA
novel_circ_0000462	0.572792	0.234887	0.62234	0.84117	NA
novel_circ_0000463	3.72638	4.74707	-0.33414	0.71669	0.96966
novel_circ_0000465	2.00779	2.34631	-0.14553	0.90975	0.9931
novel_circ_0000466	0.429805	0.843008	-0.58246	0.82178	NA
novel_circ_0000468	0	0.469775	-1.0715	0.72889	NA
novel_circ_0000469	0	0.704662	-1.634	0.59378	NA
novel_circ_0000470	0	0.552937	-1.2582	0.68302	NA
novel_circ_0000471	0.374802	0	1.9491	0.53048	NA
novel_circ_0000472	0.573074	0	2.3081	0.45624	NA
novel_circ_0000474	0	0.897324	-1.9191	0.52959	NA
novel_circ_0000475	8.14559	12.9952	-0.6905	0.19198	0.74148
novel_circ_0000479	5.25456	10.4502	-0.98346	0.13382	0.64398
novel_circ_0000480	0	1.35517	-2.5435	0.30021	NA
novel_circ_0000481	0	2.19322	-3.2348	0.090407	NA
novel_circ_0000484	0	4.49207	-4.2584	0.0013247	0.041578
novel_circ_0000485	2.67264	3.44823	-0.27355	0.78535	0.98449
novel_circ_0000489	0	3.53993	-3.926	0.0097978	0.1595
novel_circ_0000492	0	0.313183	-0.64746	0.83495	NA
novel_circ_0000493	0.286537	1.20034	-1.3991	0.53095	NA
novel_circ_0000494	1.71922	1.83796	-0.078762	0.97874	0.99914
novel_circ_0000495	8.75847	8.30396	0.0069133	0.99164	0.99971
novel_circ_0000498	0	0.333303	-0.22477	0.94246	NA
novel_circ_0000501	0	0.221175	-0.22477	0.94246	NA
novel_circ_0000503	41.2947	34.6868	0.23989	0.43102	0.89619
novel_circ_0000508	0	0.662281	-1.494	0.62647	NA
novel_circ_0000509	1.06828	1.59401	-1.0508	0.59159	NA
novel_circ_0000510	0	2.06582	-3.1317	0.15145	NA
novel_circ_0000511	1.6761	1.43382	0.29263	0.86178	0.98881
novel_circ_0000512	0.520066	1.27173	-1.4063	0.50863	NA
novel_circ_0000514	1.20963	3.8366	-1.4958	0.19545	0.74216
novel_circ_0000515	4.49491	2.58447	0.84589	NA	NA
novel_circ_0000516	0.429805	0.469775	0.20551	0.9468	NA
novel_circ_0000517	1.72561	7.27288	-2.1625	0.058862	0.43038
novel_circ_0000518	13.7055	18.3233	-0.39854	0.50148	0.92552
novel_circ_0000520	0	0.333303	-0.22477	0.94246	NA
novel_circ_0000521	3.86985	3.54201	0.19054	0.84261	0.98881
novel_circ_0000522	0	0.652538	-1.4413	0.63895	NA
novel_circ_0000523	1.28913	2.86752	-1.102	0.41675	0.89101
novel_circ_0000524	0.85961	0.397369	1.1469	0.68772	NA
novel_circ_0000525	0.573074	0.986157	-0.52574	0.8297	NA
novel_circ_0000526	0	0.662281	-1.494	0.62647	NA
novel_circ_0000527	0.58003	0.221175	1.2945	0.67583	NA
novel_circ_0000528	0	0.234887	-0.41502	0.8939	NA
novel_circ_0000530	1.1001	0.234887	1.8059	0.4802	NA
novel_circ_0000531	1.71837	0	3.6131	0.19173	NA
novel_circ_0000533	3.25867	4.55414	-0.45224	0.63382	0.9507
novel_circ_0000535	1.07281	4.04408	-1.6478	0.14077	0.65697
novel_circ_0000536	18.4381	22.7047	-0.31363	0.44575	0.90439
novel_circ_0000537	0.749603	0.221175	1.591	0.60603	NA
novel_circ_0000538	12.6157	14.5206	-0.19794	0.66913	0.9578
novel_circ_0000539	19.2751	15.3156	0.2948	0.49774	0.92447
novel_circ_0000540	19.764	18.5354	0.071919	0.88299	0.98993
novel_circ_0000541	0	0.240415	-0.22477	0.94246	NA
novel_circ_0000542	0	0.221175	-0.22477	0.94246	NA
novel_circ_0000543	0	0.815673	-1.77	0.56274	NA
novel_circ_0000544	1.24587	2.53891	-1.0789	0.5093	0.92844
novel_circ_0000545	0	0.240415	-0.22477	0.94246	NA
novel_circ_0000546	0	0.666606	-1.4692	0.63233	NA
novel_circ_0000547	0	1.32112	-2.4764	0.32082	NA
novel_circ_0000548	4.10083	5.431	-0.3654	0.63843	0.95181
novel_circ_0000549	2.11489	2.11575	0.020955	0.98827	0.99971
novel_circ_0000550	0.386687	0	1.8063	0.56141	NA
novel_circ_0000551	0.58003	2.53585	-1.9533	0.24626	0.796
novel_circ_0000552	0.829898	2.81202	-1.6115	0.24247	0.79104
novel_circ_0000553	0	0.745742	-1.6728	0.58485	NA
novel_circ_0000555	0.573074	2.5045	-1.8013	0.2084	0.76133
novel_circ_0000562	4.28655	2.98783	0.51952	0.6666	0.95717
novel_circ_0000566	1.42853	3.13295	-1.163	0.32132	0.84145
novel_circ_0000569	2.89641	2.25518	0.31761	0.79138	0.98569
novel_circ_0000570	1.81937	1.88123	0.043336	0.97686	0.99914
novel_circ_0000571	0.520066	0	1.8063	0.56141	NA
novel_circ_0000574	48.3107	44.657	0.099069	0.76238	0.97923
novel_circ_0000575	0.624669	0.730672	0.034778	0.98911	NA
novel_circ_0000578	1.44761	0.486087	1.6494	0.42583	NA
novel_circ_0000579	0.499735	0.313183	0.77591	0.80187	NA
novel_circ_0000580	0	0.724291	-1.6215	0.59666	NA
novel_circ_0000581	0	0.807098	-1.7761	0.56137	NA
novel_circ_0000582	1.08699	0.897324	0.24448	0.90695	NA
novel_circ_0000583	0.712187	1.28414	-1.4119	0.53525	NA
novel_circ_0000588	7.29632	5.1952	0.54114	0.41863	0.89101
novel_circ_0000589	0.249868	0.264913	0.65651	0.83288	NA
novel_circ_0000591	61.2634	48.4596	0.33389	0.21174	0.76332
novel_circ_0000592	8.23208	9.74607	-0.21927	0.70168	0.96635
novel_circ_0000595	0.429805	0.333303	1.0522	0.7345	NA
novel_circ_0000596	3.36325	0.264913	3.6442	0.013195	0.19093
novel_circ_0000597	4.10763	2.65716	0.66686	0.52255	0.93005
novel_circ_0000598	0.374802	0.745742	-0.48785	0.85706	NA
novel_circ_0000599	10.2285	13.2752	-0.39917	0.40276	0.88789
novel_circ_0000601	3.92228	3.21738	0.26784	0.78775	0.98467
novel_circ_0000605	0	0.391479	-0.87237	0.77834	NA
novel_circ_0000609	0.429805	1.42895	-1.3404	0.56354	NA
novel_circ_0000610	1.03614	1.55197	-0.40935	0.79987	NA
novel_circ_0000611	0.773374	2.98313	-1.8571	0.20892	0.76191
novel_circ_0000612	1.00984	1.32464	-0.2781	0.87959	NA
novel_circ_0000614	0.386687	3.44223	-2.8595	0.076495	0.50222
novel_circ_0000615	1.68458	4.59222	-1.2605	0.20753	0.76126
novel_circ_0000616	5.37637	2.29085	1.216	0.2594	0.80748
novel_circ_0000618	1.53951	1.58429	-0.022799	0.99028	0.99971
novel_circ_0000619	5.53728	1.6318	1.7327	0.09249	0.54698
novel_circ_0000620	4.28153	3.63259	0.11529	0.89772	0.9909
novel_circ_0000621	2.60111	0.723638	1.8917	0.25978	0.8075
novel_circ_0000623	0.85961	0.391479	1.0907	0.70183	NA
novel_circ_0000624	0.249868	0.313183	0.23381	0.93997	NA
novel_circ_0000625	0	0.313183	-0.64746	0.83495	NA
novel_circ_0000626	0.286537	0	1.7347	0.57724	NA
novel_circ_0000627	8.82666	7.74963	0.16236	0.81715	0.98881
novel_circ_0000628	0	0.156592	-0.13772	0.96473	NA
novel_circ_0000629	0	1.16348	-2.3073	0.42141	NA
novel_circ_0000632	0	0.313183	-0.64746	0.83495	NA
novel_circ_0000633	4.43372	4.25411	0.053984	0.95329	0.99898
novel_circ_0000634	1.14558	2.25536	-1.0911	0.51117	0.92844
novel_circ_0000637	0	0.552937	-1.2582	0.68302	NA
novel_circ_0000638	1.59632	2.41421	-0.51413	0.69639	0.96592
novel_circ_0000640	0.95976	0.950604	0.05703	0.97813	NA
novel_circ_0000641	0	0.662281	-1.494	0.62647	NA
novel_circ_0000642	2.55384	1.9256	0.38053	0.88533	0.98993
novel_circ_0000643	0.962055	0	2.6042	0.39308	NA
novel_circ_0000644	9.17219	7.75474	0.2005	0.70267	0.96643
novel_circ_0000647	12.2438	6.76336	0.87695	0.12065	0.61715
novel_circ_0000648	4.93745	4.70618	0.12348	0.87123	0.98881
novel_circ_0000649	2.2906	1.08834	1.1109	0.42386	0.89362
novel_circ_0000650	1.35935	3.27305	-1.0807	0.39565	0.88296
novel_circ_0000651	2.53934	0.815673	1.7341	0.37912	0.87118
novel_circ_0000652	0	2.49947	-3.4092	0.065569	NA
novel_circ_0000658	5.64861	8.42178	-0.59064	0.33836	0.85363
novel_circ_0000661	0.95976	1.61041	-0.63362	0.74596	NA
novel_circ_0000662	0	0.360622	-0.73621	0.81255	NA
novel_circ_0000663	0	1.90563	-3.0347	0.12916	NA
novel_circ_0000665	1.42437	0.469775	1.4146	0.57513	NA
novel_circ_0000667	3.01649	4.8185	-0.65317	0.5313	0.93005
novel_circ_0000673	1.25325	4.99536	-1.889	0.078673	0.50922
novel_circ_0000674	21.7432	25.9646	-0.26882	0.52688	0.93005
novel_circ_0000675	52.8413	69.7716	-0.40982	0.17442	0.71692
novel_circ_0000676	0	0.861254	-1.9158	0.53031	NA
novel_circ_0000677	42.8245	43.2638	-0.023621	0.93765	0.99845
novel_circ_0000678	0	0.44235	-0.9701	0.75397	NA
novel_circ_0000679	0.966717	0	2.8484	0.35496	NA
novel_circ_0000680	0	0.883456	-1.9151	0.53048	NA
novel_circ_0000681	8.04224	21.2064	-1.4539	0.021414	0.25643
novel_circ_0000682	0	0.331762	-0.6655	0.83039	NA
novel_circ_0000683	0.520066	0	1.8063	0.56141	NA
novel_circ_0000684	0	0.313183	-0.64746	0.83495	NA
novel_circ_0000685	0	0.397369	-0.8262	0.78991	NA
novel_circ_0000686	0	0.950306	-2.0254	0.50655	NA
novel_circ_0000687	0	1.08187	-2.2115	0.4675	NA
novel_circ_0000689	5.58045	4.18118	0.43581	0.59958	0.94484
novel_circ_0000691	2.03953	2.25536	-0.041827	0.97406	0.99914
novel_circ_0000695	0.716342	0.397369	0.93297	0.75362	NA
novel_circ_0000696	0	2.16154	-3.224	0.1296	NA
novel_circ_0000697	0	3.80401	-4.022	0.014376	0.20194
novel_circ_0000698	0.949871	1.46265	-0.61563	0.73245	NA
novel_circ_0000699	0	0.240415	-0.22477	0.94246	NA
novel_circ_0000700	0	0.644946	-1.4937	0.62654	NA
novel_circ_0000701	0	1.32754	-2.5073	0.31452	NA
novel_circ_0000702	0.499735	1.59041	-1.3155	0.51775	NA
novel_circ_0000703	0	1.03443	-2.1561	0.4687	NA
novel_circ_0000705	0.374802	0.927306	-0.78903	0.76054	NA
novel_circ_0000706	5.31517	17.5115	-1.7107	0.0019668	0.055379
novel_circ_0000707	0	0.234887	-0.41502	0.8939	NA
novel_circ_0000708	0	1.9545	-3.059	0.12379	NA
novel_circ_0000709	2.39898	9.64952	-1.9917	0.014704	0.20426
novel_circ_0000713	3.13371	5.0244	-0.58043	0.63198	0.9507
novel_circ_0000716	0.520066	0.796044	-0.75306	0.76719	NA
novel_circ_0000717	0	0.331762	-0.6655	0.83039	NA
novel_circ_0000718	0	0.234887	-0.41502	0.8939	NA
novel_circ_0000719	0	0.331762	-0.6655	0.83039	NA
novel_circ_0000720	1.14572	0.959178	0.21298	0.91705	NA
novel_circ_0000721	9.53613	10.0037	-0.049278	0.92906	0.99836
novel_circ_0000723	1.14558	0	3.0223	0.32522	NA
novel_circ_0000724	0.636555	1.91582	-1.3452	0.42101	NA
novel_circ_0000726	1.14587	1.50657	-0.3479	0.83152	NA
novel_circ_0000727	1.87899	0.499955	2.1349	0.28252	NA
novel_circ_0000728	0	0.625535	-1.4188	0.64432	NA
novel_circ_0000729	0	1.05826	-2.1829	0.4155	NA
novel_circ_0000730	0.85961	0	2.7326	0.3756	NA
novel_circ_0000732	0	0.326269	-0.22477	0.94246	NA
novel_circ_0000733	1.04013	0.360622	1.3945	0.61419	NA
novel_circ_0000734	0	0.397369	-0.8262	0.78991	NA
novel_circ_0000735	0.286537	0	1.7347	0.57724	NA
novel_circ_0000743	1.35482	0	3.2463	0.23071	NA
novel_circ_0000744	0.249868	0.552937	-0.37691	0.90256	NA
novel_circ_0000745	0.429805	0.989358	-0.75704	0.76428	NA
novel_circ_0000747	0.749603	7.94185	-3.0228	0.0062617	0.12232
novel_circ_0000748	0	1.59863	-2.7743	0.28125	NA
novel_circ_0000749	0.859187	3.13073	-2.1292	0.14349	0.66391
novel_circ_0000750	0	0.234887	-0.41502	0.8939	NA
novel_circ_0000751	0	0.552937	-1.2582	0.68302	NA
novel_circ_0000752	1.05647	2.20948	-0.99091	0.41716	0.89101
novel_circ_0000755	4.37214	5.28178	-0.31717	0.70791	0.96754
novel_circ_0000756	0.286537	0	1.7347	0.57724	NA
novel_circ_0000758	0	1.15397	-2.308	0.42106	NA
novel_circ_0000760	4.66809	5.25643	-0.13372	0.86246	0.98881
novel_circ_0000763	1.23399	0.734687	0.67872	0.74293	NA
novel_circ_0000764	0.573074	3.32103	-2.2519	0.19713	0.74425
novel_circ_0000765	0	0.221175	-0.22477	0.94246	NA
novel_circ_0000766	1.3534	3.73507	-1.4181	0.305	0.83498
novel_circ_0000768	1.00288	4.8684	-2.0776	0.10872	0.58738
novel_circ_0000771	6.69532	5.90741	0.12922	0.85323	0.98881
novel_circ_0000772	0.866567	4.72474	-2.3248	0.056545	0.42515
novel_circ_0000776	0	0.333303	-0.22477	0.94246	NA
novel_circ_0000777	0	0.548071	-1.2829	0.67702	NA
novel_circ_0000779	0	0.326269	-0.22477	0.94246	NA
novel_circ_0000780	75.1963	64.4267	0.22596	0.36599	0.87057
novel_circ_0000781	0.911206	0.156592	1.9186	0.47788	NA
novel_circ_0000782	0.58003	0.240415	1.2945	0.67583	NA
novel_circ_0000783	0	1.08386	-2.2313	0.39705	NA
novel_circ_0000784	0	0.313183	-0.64746	0.83495	NA
novel_circ_0000787	3.41454	1.52723	1.2233	0.30293	0.8325
novel_circ_0000788	0	0.333303	-0.22477	0.94246	NA
novel_circ_0000789	0	0.156592	-0.13772	0.96473	NA
novel_circ_0000790	3.10022	4.05957	-0.3763	0.77579	0.98114
novel_circ_0000791	1.46645	1.05376	0.50918	0.79075	NA
novel_circ_0000792	22.5525	39.6534	-0.81074	0.018644	0.23262
novel_circ_0000793	3.6324	3.46774	0.16884	0.86027	0.98881
novel_circ_0000794	2.29117	6.05432	-1.4346	0.50118	0.92552
novel_circ_0000795	0	0.499955	-0.95906	0.75671	NA
novel_circ_0000799	0	0.221175	-0.22477	0.94246	NA
novel_circ_0000800	0	0.264913	-0.22477	0.94246	NA
novel_circ_0000801	3.80389	4.01363	0.03001	0.97715	0.99914
novel_circ_0000802	0	0.221175	-0.22477	0.94246	NA
novel_circ_0000803	0.573074	0.469775	0.46686	0.87769	NA
novel_circ_0000804	1.28942	0	3.271	0.28066	NA
novel_circ_0000808	0.429805	0	2.046	0.50999	NA
novel_circ_0000810	0	5.33285	-4.5027	NA	NA
novel_circ_0000811	0	0.942304	-1.9987	0.51229	NA
novel_circ_0000812	0	3.92071	-4.0609	0.0062569	0.12232
novel_circ_0000813	0	4.65847	-4.3109	0.00085863	0.031205
novel_circ_0000814	0	0.397369	-0.8262	0.78991	NA
novel_circ_0000815	4.99487	3.68177	0.35602	0.69419	0.96592
novel_circ_0000816	1.38464	0	3.3829	0.15853	NA
novel_circ_0000817	2.7267	2.4872	0.12116	0.9237	0.9974
novel_circ_0000818	3.85604	4.70447	-0.21587	0.80186	0.98881
novel_circ_0000819	7.22138	6.17711	0.19319	0.75947	0.97874
novel_circ_0000822	0.499735	0.331762	0.75787	0.80634	NA
novel_circ_0000823	1.04013	0	2.9037	0.34536	NA
novel_circ_0000825	0	0.234887	-0.41502	0.8939	NA
novel_circ_0000829	3.17535	3.97263	-0.34755	0.72506	0.97181
novel_circ_0000830	0	0.234887	-0.41502	0.8939	NA
novel_circ_0000831	0.429805	0.853431	-0.6005	0.79862	NA
novel_circ_0000832	6.82914	3.11583	1.0239	0.18938	0.73907
novel_circ_0000834	2.53007	1.50008	0.68566	0.66734	0.95721
novel_circ_0000835	0.374802	0.221175	0.95538	0.75829	NA
novel_circ_0000836	0.661338	0	2.451	0.42829	NA
novel_circ_0000843	2.30128	3.02945	-0.29759	0.81056	0.98881
novel_circ_0000844	0	1.75755	-2.9179	0.19535	NA
novel_circ_0000845	0	1.75318	-2.8899	0.1652	NA
novel_circ_0000846	2.94949	2.9813	0.058711	0.95423	0.99898
novel_circ_0000847	0	0.548071	-1.2829	0.67702	NA
novel_circ_0000848	8.55049	12.347	-0.54761	0.28873	0.81964
novel_circ_0000849	0	0.240415	-0.22477	0.94246	NA
novel_circ_0000851	0.374802	2.04176	-1.9138	0.33242	NA
novel_circ_0000852	8.2421	10.6879	-0.30606	0.60199	0.94668
novel_circ_0000853	0	1.44894	-2.6143	0.2346	NA
novel_circ_0000854	3.79071	2.12796	0.9019	0.42778	0.89619
novel_circ_0000855	0.624669	0.44235	0.66313	0.82583	NA
novel_circ_0000856	0.386687	1.06872	-1.1958	0.62556	NA
novel_circ_0000859	6.41375	8.60496	-0.42627	0.51422	0.93004
novel_circ_0000860	0.949871	4.06385	-2.0628	0.10447	0.57611
novel_circ_0000865	0	1.63376	-2.8005	0.22711	NA
novel_circ_0000869	44.5574	66.2204	-0.55693	0.057852	0.42828
novel_circ_0000871	16.237	24.1596	-0.56869	0.17826	0.72133
novel_circ_0000874	1.42437	0	3.3044	0.26242	NA
novel_circ_0000875	6.18	8.57518	-0.46467	0.4981	0.92447
novel_circ_0000876	2.3598	1.09348	1.085	0.42996	0.89619
novel_circ_0000877	0	0.702004	-1.5926	0.60336	NA
novel_circ_0000878	0.58003	3.57751	-2.4161	0.16572	0.70843
novel_circ_0000879	0.572792	0.469775	-0.037332	0.99013	NA
novel_circ_0000880	18.0085	22.7159	-0.31295	0.40669	0.88889
novel_circ_0000881	6.26238	16.1771	-1.3431	0.009909	0.16089
novel_circ_0000882	0	0.666606	-1.4692	0.63233	NA
novel_circ_0000883	2.56066	1.50961	0.73985	0.61205	0.94902
novel_circ_0000884	0	2.0379	-3.1402	0.14299	NA
novel_circ_0000887	5.51354	5.14921	0.11612	0.91446	0.99486
novel_circ_0000888	2.71353	3.41498	-0.31844	0.79777	0.98769
novel_circ_0000889	0	0.397369	-0.8262	0.78991	NA
novel_circ_0000890	1.43198	0.989358	0.52622	0.80885	NA
novel_circ_0000893	0.499735	0.839719	-0.41217	0.87155	NA
novel_circ_0000894	0	0.839719	-1.8467	0.54558	NA
novel_circ_0000897	0.286537	2.40955	-2.4046	0.16181	NA
novel_circ_0000898	0	0.313183	-0.64746	0.83495	NA
novel_circ_0000900	1.89434	1.66566	0.22872	0.88773	0.98996
novel_circ_0000901	9.94369	14.6243	-0.61872	0.21396	0.76425
novel_circ_0000906	8.34476	8.75632	-0.069359	0.89853	0.9909
novel_circ_0000907	7.8666	9.38301	-0.25765	0.65741	0.9563
novel_circ_0000908	0	1.03353	-2.1368	0.42987	NA
novel_circ_0000909	3.45618	2.35278	0.62014	0.60942	0.948
novel_circ_0000910	2.64008	1.84104	0.49116	0.84979	0.98881
novel_circ_0000911	0.249868	0.264913	0.65651	0.83288	NA
novel_circ_0000912	0.249868	0.815673	-0.88789	0.76911	NA
novel_circ_0000913	1.06828	0.921304	-0.22114	0.92292	NA
novel_circ_0000914	0	2.05037	-3.1266	0.11177	NA
novel_circ_0000915	1.35317	3.31798	-1.2656	0.31571	0.84111
novel_circ_0000921	1.1244	3.26025	-1.3317	0.35587	0.86726
novel_circ_0000923	12.6488	12.2924	0.010837	0.98379	0.99932
novel_circ_0000924	17.9127	13.2617	0.43026	0.36051	0.86933
novel_circ_0000925	8.92616	9.17613	-0.018809	0.97328	0.99914
novel_circ_0000927	0.573074	0.156592	1.4014	0.65082	NA
novel_circ_0000928	1.27311	2.72656	-0.97441	0.51067	0.92844
novel_circ_0000932	0.859187	0	2.6378	0.39303	NA
novel_circ_0000934	0	0.360622	-0.73621	0.81255	NA
novel_circ_0000936	0	0.326269	-0.22477	0.94246	NA
novel_circ_0000937	0	0.486087	-1.0633	0.73092	NA
novel_circ_0000940	1.5602	1.23063	0.31161	0.87059	NA
novel_circ_0000944	8.67263	6.88264	0.36605	0.52372	0.93005
novel_circ_0000945	25.3285	29.9916	-0.23283	0.51093	0.92844
novel_circ_0000947	1.19746	0.89498	0.40704	0.82654	NA
novel_circ_0000949	5.93608	10.8154	-0.81764	0.1811	0.72801
novel_circ_0000953	0	0.548071	-1.2829	0.67702	NA
novel_circ_0000955	1.92568	1.72876	0.084557	0.95552	0.99914
novel_circ_0000956	0.429805	1.52139	-1.4014	0.46636	NA
novel_circ_0000957	0.573074	1.9802	-1.5112	0.43673	NA
novel_circ_0000958	0	0.652538	-1.4413	0.63895	NA
novel_circ_0000959	4.08446	3.24287	0.31381	0.73007	0.97258
novel_circ_0000960	0	1.06418	-2.1966	0.40906	NA
novel_circ_0000961	1.0026	0.596675	0.74461	0.73633	NA
novel_circ_0000962	0.573074	0	2.3081	0.45624	NA
novel_circ_0000963	0	0.360622	-0.73621	0.81255	NA
novel_circ_0000964	0.949871	3.75561	-1.9177	0.10408	0.57561
novel_circ_0000965	16.7557	11.5349	0.55214	0.19451	0.74148
novel_circ_0000966	0.499735	0	2.1924	0.47961	NA
novel_circ_0000967	3.53533	1.53941	1.1678	0.31979	0.84145
novel_circ_0000968	2.02764	4.13116	-0.85594	0.37	0.87057
novel_circ_0000969	2.21223	3.65029	-0.65271	0.53013	0.93005
novel_circ_0000971	0	0.469775	-1.0715	0.72889	NA
novel_circ_0000972	0.286537	0	1.7347	0.57724	NA
novel_circ_0000974	0.249868	0	1.6503	0.59614	NA
novel_circ_0000977	1.10303	1.22104	-0.075496	0.96688	NA
novel_circ_0000978	0	0.489404	-0.95906	0.75671	NA
novel_circ_0000979	3.02484	1.74785	0.81852	0.49074	0.92232
novel_circ_0000981	3.00545	4.8937	-0.72222	0.45073	0.90638
novel_circ_0000982	0.429805	0.397369	0.45081	0.884	NA
novel_circ_0000983	13.9133	11.7845	0.19873	0.68593	0.96464
novel_circ_0000984	1.5602	3.04653	-1.046	0.45365	0.90745
novel_circ_0000985	0	1.90643	-3.0126	0.13619	NA
novel_circ_0000986	0.573074	0.391479	0.66679	0.82863	NA
novel_circ_0000988	1.97562	1.48163	0.44358	0.75461	0.97813
novel_circ_0000991	0	0.331762	-0.6655	0.83039	NA
novel_circ_0000992	0.520066	0.313183	0.3899	0.89995	NA
novel_circ_0000993	6.1169	7.8643	-0.37442	0.59671	0.94484
novel_circ_0000998	0	4.45404	-4.2356	0.0045375	0.10058
novel_circ_0001000	23.2536	26.2841	-0.14655	0.69408	0.96592
novel_circ_0001001	4.06809	3.70582	0.1863	0.81635	0.98881
novel_circ_0001005	0	0.333303	-0.22477	0.94246	NA
novel_circ_0001009	8.45786	5.62155	0.5647	0.38038	0.87166
novel_circ_0001012	16.2389	11.3314	0.52455	0.27567	0.81696
novel_circ_0001013	0.499735	1.72371	-1.4005	0.48919	NA
novel_circ_0001014	5.78378	2.0929	1.5248	0.15637	0.69178
novel_circ_0001015	60.2799	48.8214	0.31005	0.27666	0.81696
novel_circ_0001019	1.31815	1.41258	-0.21284	0.90402	NA
novel_circ_0001020	6.23009	4.17045	0.56728	0.51722	0.93005
novel_circ_0001021	0	0.264913	-0.22477	0.94246	NA
novel_circ_0001022	2.30357	0.489404	2.4516	0.19573	NA
novel_circ_0001023	0.573074	0	2.3081	0.45624	NA
novel_circ_0001025	0	1.62414	-2.7925	0.23019	NA
novel_circ_0001026	0	0.489404	-0.95906	0.75671	NA
novel_circ_0001032	1.25275	5.46225	-1.917	0.10672	0.57989
novel_circ_0001033	0.374802	1.2965	-1.2592	0.60011	NA
novel_circ_0001034	0.716342	1.2576	-0.67711	0.7645	NA
novel_circ_0001035	2.75711	7.70948	-1.3557	0.089203	0.53927
novel_circ_0001036	0.58003	0.97979	-0.53849	0.82501	NA
novel_circ_0001037	0	0.313183	-0.64746	0.83495	NA
novel_circ_0001039	1.6648	1.494	0.19218	0.90922	0.9931
novel_circ_0001040	0	0.529825	-1.1709	0.70438	NA
novel_circ_0001041	0.712187	0.313183	0.38796	0.89869	NA
novel_circ_0001042	0	0.221175	-0.22477	0.94246	NA
novel_circ_0001043	0	0.639452	-1.4556	0.63554	NA
novel_circ_0001044	4.58549	3.0418	0.52513	0.517	0.93005
novel_circ_0001045	0.249868	0	1.6503	0.59614	NA
novel_circ_0001048	25.5798	14.7174	0.82293	0.057211	0.42616
novel_circ_0001049	0.429805	0	2.046	0.50999	NA
novel_circ_0001050	0	0.234887	-0.41502	0.8939	NA
novel_circ_0001051	1.49617	0.578096	1.3831	0.45662	NA
novel_circ_0001052	9.69338	6.86177	0.55015	0.43025	0.89619
novel_circ_0001055	0.386687	0	1.8063	0.56141	NA
novel_circ_0001056	2.13656	1.83552	0.073574	0.96655	0.99914
novel_circ_0001057	0	0.499955	-0.95906	0.75671	NA
novel_circ_0001059	9.30581	6.9649	0.36122	0.63763	0.95181
novel_circ_0001061	0	0.360622	-0.73621	0.81255	NA
novel_circ_0001062	0	0.995948	-2.109	0.43781	NA
novel_circ_0001063	0	0.572177	-1.3024	0.67228	NA
novel_circ_0001064	4.43404	3.48728	0.26495	0.80493	0.98881
novel_circ_0001066	0.58003	0.333303	1.2945	0.67583	NA
novel_circ_0001067	1.04013	0.391479	1.245	0.6495	NA
novel_circ_0001068	1.46994	0.673805	1.0666	0.59629	NA
novel_circ_0001069	0	0.469775	-1.0715	0.72889	NA
novel_circ_0001070	18.2795	22.1939	-0.30576	0.5272	0.93005
novel_circ_0001073	1.06828	1.4166	-0.81675	0.70813	NA
novel_circ_0001074	0	1.32705	-2.5103	0.40837	NA
novel_circ_0001083	0.429805	0.326269	1.0522	0.7345	NA
novel_circ_0001084	3.56396	6.67276	-0.80545	0.34989	0.86347
novel_circ_0001085	0.386687	2.79889	-2.5784	0.11757	0.6089
novel_circ_0001086	0	0.156592	-0.13772	0.96473	NA
novel_circ_0001087	0.286537	0	1.7347	0.57724	NA
novel_circ_0001090	0	0.529825	-1.1709	0.70438	NA
novel_circ_0001092	1.00288	0.264913	1.938	0.49179	NA
novel_circ_0001093	0.429805	0	2.046	0.50999	NA
novel_circ_0001094	0	2.17732	-3.2262	0.12632	NA
novel_circ_0001095	1.67497	1.04283	0.66853	0.70353	NA
novel_circ_0001098	0	0.44235	-0.9701	0.75397	NA
novel_circ_0001099	0.374802	0.264913	0.95538	0.75829	NA
novel_circ_0001101	0.573074	0.360622	0.80295	0.79471	NA
novel_circ_0001102	1.67582	2.20542	-0.33181	0.79508	0.98651
novel_circ_0001103	1.26122	0.56665	1.1678	0.57795	NA
novel_circ_0001105	0.572792	0	1.8063	0.56141	NA
novel_circ_0001108	7.4769	6.87274	0.10382	0.87889	0.98993
novel_circ_0001110	5.69039	8.53053	-0.58663	0.50351	0.92552
novel_circ_0001111	3.7273	3.61453	0.0072983	0.99413	0.99971
novel_circ_0001112	0	1.34937	-2.5161	0.30918	NA
novel_circ_0001113	0.499735	2.25054	-1.7812	0.30217	NA
novel_circ_0001114	4.0168	1.898	1.0706	0.33548	0.85282
novel_circ_0001116	0	0.156592	-0.13772	0.96473	NA
novel_circ_0001118	0.374802	0	1.9491	0.53048	NA
novel_circ_0001122	0.716342	2.53741	-1.6043	0.28905	0.8199
novel_circ_0001123	0.429805	3.69193	-2.6625	0.065918	0.46026
novel_circ_0001126	0	0.645995	-1.4486	0.63722	NA
novel_circ_0001128	5.71349	8.94899	-0.62563	0.4064	0.88889
novel_circ_0001139	0.780099	0.360622	1.039	0.7252	NA
novel_circ_0001141	1.09314	0	3.0086	0.29979	NA
novel_circ_0001142	2.81861	2.72631	0.042849	0.97169	0.99914
novel_circ_0001150	1.85908	5.35558	-1.3496	0.22372	0.77497
novel_circ_0001152	0	0.360622	-0.73621	0.81255	NA
novel_circ_0001153	9.90057	7.64403	0.28908	0.6126	0.94902
novel_circ_0001154	4.40583	4.66258	-0.052868	0.95393	0.99898
novel_circ_0001155	0	1.45551	-2.6281	0.27499	NA
novel_circ_0001157	3.2601	2.77092	0.23507	0.83654	0.98881
novel_circ_0001158	2.301	0.264913	3.0947	0.10458	NA
novel_circ_0001159	0	0.240415	-0.22477	0.94246	NA
novel_circ_0001160	1.28899	3.14298	-1.3327	0.34567	0.86168
novel_circ_0001161	3.2972	3.58086	-0.036092	0.97317	0.99914
novel_circ_0001162	9.74987	8.12051	0.30975	0.56653	0.93991
novel_circ_0001163	0	0.333303	-0.22477	0.94246	NA
novel_circ_0001166	0	0.221175	-0.22477	0.94246	NA
novel_circ_0001169	102.687	107.199	-0.056532	0.77385	0.98091
novel_circ_0001170	0.520066	0	1.8063	0.56141	NA
novel_circ_0001171	0.573074	0	2.3081	0.45624	NA
novel_circ_0001173	0	2.04144	-3.1125	0.11635	NA
novel_circ_0001174	2.23687	3.76798	-0.66875	0.56671	0.93991
novel_circ_0001175	8.74634	11.6025	-0.44731	0.41213	0.89086
novel_circ_0001178	36.3225	58.8938	-0.67366	0.014532	0.20328
novel_circ_0001179	0.429805	0	2.046	0.50999	NA
novel_circ_0001180	0.573074	0	2.3081	0.45624	NA
novel_circ_0001182	10.9119	2.79351	1.9322	0.013994	0.1992
novel_circ_0001184	20.0845	6.358	1.6344	0.013886	0.19859
novel_circ_0001186	1.04013	0	2.9037	0.34536	NA
novel_circ_0001187	13.4424	3.70562	1.8442	0.23898	0.78942
novel_circ_0001188	1.64831	0.489404	1.8674	0.40436	NA
novel_circ_0001190	2.34812	3.71125	-0.76465	0.49441	0.9231
novel_circ_0001192	12.0541	8.27029	0.50222	0.42314	0.89362
novel_circ_0001194	0.761488	0.360622	1.0865	0.68664	NA
novel_circ_0001196	0.716342	1.4222	-0.80137	0.69411	NA
novel_circ_0001198	0.429805	0.469775	0.20551	0.9468	NA
novel_circ_0001199	2.42128	2.36011	0.097947	0.94334	0.99845
novel_circ_0001201	1.69295	2.20349	-0.43001	0.74982	0.97771
novel_circ_0001203	0	0.877566	-1.927	0.49871	NA
novel_circ_0001204	2.88669	4.35212	-0.53663	0.58288	0.9417
novel_circ_0001205	10.3556	9.35295	0.14878	0.80538	0.98881
novel_circ_0001206	0.429805	1.51413	-1.3884	0.50815	NA
novel_circ_0001208	9.69149	5.88518	0.74948	0.25257	0.80128
novel_circ_0001210	0.429805	0	2.046	0.50999	NA
novel_circ_0001211	0.429805	0	2.046	0.50999	NA
novel_circ_0001212	1.2099	0	3.1416	0.26172	NA
novel_circ_0001214	2.02268	1.82141	0.24255	0.85651	0.98881
novel_circ_0001215	0.499735	0	2.1924	0.47961	NA
novel_circ_0001216	0	1.14089	-2.2768	0.38328	NA
novel_circ_0001218	0	0.221175	-0.22477	0.94246	NA
novel_circ_0001220	0.499735	2.83763	-2.0861	0.17642	0.71952
novel_circ_0001221	6.68289	5.59966	0.3121	0.63813	0.95181
novel_circ_0001222	11.6529	16.0127	-0.45072	0.31621	0.84111
novel_circ_0001223	1.09286	0.529825	1.0073	0.67779	NA
novel_circ_0001225	1.09114	3.15896	-1.3468	0.30422	0.83364
novel_circ_0001228	1.53486	0	3.5101	0.17271	NA
novel_circ_0001229	11.0603	7.13445	0.69697	0.22119	0.77071
novel_circ_0001232	3.05773	3.72163	-0.30043	0.7595	0.97874
novel_circ_0001233	0.374802	0.618181	-0.24301	0.92437	NA
novel_circ_0001234	0.761488	0.156592	1.6782	0.55656	NA
novel_circ_0001237	0	1.67341	-2.8539	0.21233	NA
novel_circ_0001238	0.429805	0	2.046	0.50999	NA
novel_circ_0001240	1.39545	0.734687	0.83305	0.68218	NA
novel_circ_0001241	1.82441	7.26975	-1.8166	0.039677	0.35614
novel_circ_0001244	0.249868	0	1.6503	0.59614	NA
novel_circ_0001245	0.780099	0.326269	1.5504	0.60076	NA
novel_circ_0001246	2.35354	3.20965	-0.50924	0.74143	0.97621
novel_circ_0001247	1.43268	1.86304	-0.2541	0.87925	0.98993
novel_circ_0001248	0	0.793352	-1.7712	0.56247	NA
novel_circ_0001249	2.10973	1.56239	0.50361	0.73591	0.97476
novel_circ_0001250	0.573074	3.83225	-2.4266	0.088794	0.53927
novel_circ_0001259	0	0.156592	-0.13772	0.96473	NA
novel_circ_0001260	0	0.682764	-1.5559	0.61193	NA
novel_circ_0001262	1.43922	2.10491	-0.60004	0.68911	0.96513
novel_circ_0001263	6.1117	8.62677	-0.38074	0.5716	0.94054
novel_circ_0001264	2.76575	1.53575	0.82484	0.54258	0.93524
novel_circ_0001266	0	0.221175	-0.22477	0.94246	NA
novel_circ_0001267	1.23641	0.989358	0.4164	0.83709	NA
novel_circ_0001271	0	0.4998	-1.1196	0.71702	NA
novel_circ_0001272	0.429805	0.978807	-0.75314	0.78657	NA
novel_circ_0001273	0.780099	0	2.5467	0.41004	NA
novel_circ_0001275	0	0.234887	-0.41502	0.8939	NA
novel_circ_0001276	0.780099	2.02294	-1.4477	0.39987	NA
novel_circ_0001279	6.54821	5.87833	0.12344	0.84427	0.98881
novel_circ_0001281	0.429805	2.94484	-2.353	0.11606	0.60592
novel_circ_0001285	1.02997	0.499955	1.2286	0.61782	NA
novel_circ_0001287	0.374802	0	1.9491	0.53048	NA
novel_circ_0001289	6.47502	0	5.5466	3.5228e-05	0.0025606
novel_circ_0001290	0.58003	0	2.2883	0.46021	NA
novel_circ_0001291	17.7917	0	7.0185	1.9977e-09	4.306e-07
novel_circ_0001292	0	0.360622	-0.73621	0.81255	NA
novel_circ_0001293	0.949871	0.907021	0.14444	0.94599	NA
novel_circ_0001294	8.35864	6.49579	0.33232	0.61156	0.94902
novel_circ_0001295	15.66	10.698	0.50346	0.3252	0.8442
novel_circ_0001296	3.54803	1.58039	1.2337	0.32184	0.84145
novel_circ_0001297	0	0.552937	-1.2582	0.68302	NA
novel_circ_0001298	0	0.552937	-1.2582	0.68302	NA
novel_circ_0001299	1.00288	0	2.9224	0.34214	NA
novel_circ_0001300	0	0.234887	-0.41502	0.8939	NA
novel_circ_0001302	0	0.833258	-1.7985	0.55634	NA
novel_circ_0001303	0	0.221175	-0.22477	0.94246	NA
novel_circ_0001304	0	0.552937	-1.2582	0.68302	NA
novel_circ_0001305	0	0.240415	-0.22477	0.94246	NA
novel_circ_0001306	0	1.60096	-2.7809	0.23054	NA
novel_circ_0001307	0.749603	3.05009	-1.7769	0.27288	0.81696
novel_circ_0001308	3.27056	9.35893	-1.5347	0.039262	0.35415
novel_circ_0001309	0.249868	2.09067	-2.2658	0.17437	NA
novel_circ_0001310	0	0.44235	-0.9701	0.75397	NA
novel_circ_0001312	0.520066	0.333303	0.8126	0.79372	NA
novel_circ_0001313	0.286537	1.55833	-1.7753	0.40099	NA
novel_circ_0001314	0	0.234887	-0.41502	0.8939	NA
novel_circ_0001316	0	0.44235	-0.9701	0.75397	NA
novel_circ_0001317	0.773374	0.932799	-0.19382	0.93486	NA
novel_circ_0001318	0.712187	0	1.8063	0.56141	NA
novel_circ_0001320	11.2507	4.73335	1.2708	0.14579	0.66618
novel_circ_0001321	0	0.360622	-0.73621	0.81255	NA
novel_circ_0001322	0.249868	0	1.6503	0.59614	NA
novel_circ_0001323	0	0.264913	-0.22477	0.94246	NA
novel_circ_0001325	0	0.333303	-0.22477	0.94246	NA
novel_circ_0001326	6.62914	0.156592	4.6336	0.0011866	0.039034
novel_circ_0001327	2.29117	0	4.0308	0.1115	NA
novel_circ_0001329	64.1369	6.3973	3.3105	3.4406e-15	2.3897e-12
novel_circ_0001331	57.9454	3.19487	4.1953	1.6471e-22	1.0296e-18
novel_circ_0001332	4.83564	0.360622	3.6725	0.012291	0.18293
novel_circ_0001333	1.14558	0	3.0223	0.32522	NA
novel_circ_0001336	1.16006	0	3.0939	0.31337	NA
novel_circ_0001337	1.68013	0	3.6171	0.15061	NA
novel_circ_0001338	1.06828	0	2.6378	0.39303	NA
novel_circ_0001339	5.33548	0.333303	4.2627	0.0035928	0.087049
novel_circ_0001340	1.09314	0	3.0086	0.29979	NA
novel_circ_0001341	3.63338	0	4.6916	0.0046523	0.1024
novel_circ_0001342	0	0.499955	-0.95906	0.75671	NA
novel_circ_0001343	0.716342	0	2.5243	0.41429	NA
novel_circ_0001346	0.429805	0	2.046	0.50999	NA
novel_circ_0001347	0.429805	0.693925	-0.26772	0.92125	NA
novel_circ_0001349	1.40477	0.721244	0.97241	0.66087	NA
novel_circ_0001350	1.21192	2.42977	-1.0437	0.4973	0.92408
novel_circ_0001351	0.374802	0.377766	0.36811	0.90515	NA
novel_circ_0001352	12.1863	18.8918	-0.61034	0.24082	0.79086
novel_circ_0001353	0	0.221175	-0.22477	0.94246	NA
novel_circ_0001355	0	0.221175	-0.22477	0.94246	NA
novel_circ_0001356	0.822941	3.47616	-1.8461	0.20282	0.75242
novel_circ_0001357	3.32593	2.14031	0.69776	0.57932	0.94138
novel_circ_0001358	118.088	84.2181	0.49348	0.021156	0.25485
novel_circ_0001359	0.429805	0	2.046	0.50999	NA
novel_circ_0001360	9.55473	10.9199	-0.1845	0.72001	0.9705
novel_circ_0001362	2.01967	1.79484	0.25529	0.86358	0.98881
novel_circ_0001364	0.716342	1.23882	-0.62532	0.78454	NA
novel_circ_0001369	0	0.815673	-1.77	0.56274	NA
novel_circ_0001371	0	0.397369	-0.8262	0.78991	NA
novel_circ_0001373	0.286537	0	1.7347	0.57724	NA
novel_circ_0001375	1.49229	2.21524	-0.70397	0.6431	0.95181
novel_circ_0001377	26.0839	11.1648	1.2184	0.007631	0.13761
novel_circ_0001379	0	2.17567	-3.2047	0.097755	NA
novel_circ_0001381	0.374802	4.71886	-3.0547	0.015023	0.2056
novel_circ_0001383	9.17948	7.60794	0.24857	0.69604	0.96592
novel_circ_0001384	2.21301	4.78482	-1.0451	0.41232	0.89086
novel_circ_0001385	0	1.32581	-2.5041	0.36071	NA
novel_circ_0001386	3.96493	1.92512	0.99824	0.33275	0.85003
novel_circ_0001388	0	0.234887	-0.41502	0.8939	NA
novel_circ_0001389	0.249868	0.925837	-1.1385	0.66637	NA
novel_circ_0001390	0	0.333303	-0.22477	0.94246	NA
novel_circ_0001391	0.386687	0.391479	0.165	0.95746	NA
novel_circ_0001392	6.81412	6.54073	0.091943	0.8954	0.9909
novel_circ_0001393	17.6731	14.9433	0.2028	0.61554	0.94902
novel_circ_0001394	0	0.794013	-1.7807	0.56032	NA
novel_circ_0001395	0.894868	11.2906	-3.5409	0.00015858	0.0086124
novel_circ_0001396	0.712187	3.45696	-2.8638	0.050045	0.40052
novel_circ_0001397	0	0.601037	-1.3668	0.65676	NA
novel_circ_0001398	0	0.331762	-0.6655	0.83039	NA
novel_circ_0001399	0	0.156592	-0.13772	0.96473	NA
novel_circ_0001400	0	0.812592	-1.8032	0.55527	NA
novel_circ_0001401	0.822941	0.221175	1.704	0.53149	NA
novel_circ_0001406	16.5082	6.14548	1.4276	0.028402	0.30034
novel_circ_0001408	18.4966	3.67266	2.3378	0.0057998	0.1162
novel_circ_0001410	8.90222	0.721244	3.5853	0.0024199	0.063292
novel_circ_0001411	0	0.489404	-0.95906	0.75671	NA
novel_circ_0001413	6.90019	3.38928	0.99327	0.29557	0.82481
novel_circ_0001414	0.429805	0.264913	1.0522	0.7345	NA
novel_circ_0001416	1.87713	2.47448	-0.34279	0.82963	0.98881
novel_circ_0001418	0	0.994044	-2.0864	0.4907	NA
novel_circ_0001419	26.2944	29.2573	-0.14443	0.74699	0.97685
novel_circ_0001420	3.29799	6.12919	-0.95893	0.22872	0.78013
novel_circ_0001423	2.07153	3.2012	-0.57649	0.65109	0.9554
novel_circ_0001424	0	2.76288	-3.554	0.074229	NA
novel_circ_0001425	0.286537	0.480829	-0.087466	0.9774	NA
novel_circ_0001426	1.49574	0.552937	1.3862	0.50116	NA
novel_circ_0001427	3.29262	2.32067	0.46877	0.62232	0.95005
novel_circ_0001428	2.3048	0.326269	3.1104	0.098981	NA
novel_circ_0001429	0	0.499955	-0.95906	0.75671	NA
novel_circ_0001431	0.716342	0	2.5243	0.41429	NA
novel_circ_0001432	0.573074	0	2.3081	0.45624	NA
novel_circ_0001434	0	0.156592	-0.13772	0.96473	NA
novel_circ_0001435	1.10906	1.50806	-0.46209	0.81297	NA
novel_circ_0001436	0	0.44235	-0.9701	0.75397	NA
novel_circ_0001439	0	0.883456	-1.9151	0.53048	NA
novel_circ_0001442	5.14578	2.8475	0.82519	0.40964	0.89048
novel_circ_0001443	8.48501	5.40684	0.66759	0.29337	0.82235
novel_circ_0001444	5.25196	1.82198	1.4058	0.19394	0.74148
novel_circ_0001445	3.07857	0	4.5271	0.029944	0.30787
novel_circ_0001446	1.53886	0.331762	2.0549	0.32824	NA
novel_circ_0001447	8.6972	6.5783	0.43729	0.52958	0.93005
novel_circ_0001448	0	0.499955	-0.95906	0.75671	NA
novel_circ_0001449	8.36945	8.88409	-0.068908	0.89725	0.9909
novel_circ_0001450	0.374802	0	1.9491	0.53048	NA
novel_circ_0001451	0.962055	0.835924	-0.048656	0.98186	NA
novel_circ_0001452	0	0.469775	-1.0715	0.72889	NA
novel_circ_0001453	1.10906	0.554478	1.0084	0.64658	NA
novel_circ_0001454	12.521	12.5033	0.025949	0.95522	0.99914
novel_circ_0001455	6.05226	3.53055	0.75485	0.45149	0.90638
novel_circ_0001456	0	1.20722	-2.3563	0.35873	NA
novel_circ_0001457	0	0.764712	-1.7169	0.57478	NA
novel_circ_0001458	0.929541	2.14803	-1.002	0.52095	0.93005
novel_circ_0001459	1.14558	0	3.0223	0.32522	NA
novel_circ_0001461	8.19989	13.2593	-0.7392	0.16389	0.70412
novel_circ_0001462	0	0.729818	-1.6196	0.59711	NA
novel_circ_0001463	1.09314	6.28067	-2.4397	0.034276	0.33265
novel_circ_0001464	0	1.63777	-2.7969	0.23118	NA
novel_circ_0001465	0	0.360622	-0.73621	0.81255	NA
novel_circ_0001466	0	0.969546	-2.0536	0.45663	NA
novel_circ_0001467	0	0.234887	-0.41502	0.8939	NA
novel_circ_0001468	0	0.782958	-1.7818	0.56008	NA
novel_circ_0001469	4.82608	13.7867	-1.6006	0.016989	0.21907
novel_circ_0001472	0	1.56341	-2.735	0.20099	NA
novel_circ_0001476	0	0.499955	-0.95906	0.75671	NA
novel_circ_0001477	0	0.740369	-1.6383	0.59279	NA
novel_circ_0001478	0.286537	0.878198	-0.94229	0.7221	NA
novel_circ_0001480	1.02324	2.156	-0.96496	0.53518	0.93005
novel_circ_0001481	0.716342	0	2.5243	0.41429	NA
novel_circ_0001484	1.06828	0	2.6378	0.39303	NA
novel_circ_0001486	0.499735	1.29934	-1.0332	0.62756	NA
novel_circ_0001487	0	0.221175	-0.22477	0.94246	NA
novel_circ_0001488	1.30017	0	3.2223	0.28851	NA
novel_circ_0001489	1.04013	1.61659	-0.70834	0.69078	NA
novel_circ_0001490	0	0.46159	-1.0122	0.74353	NA
novel_circ_0001491	1.29344	2.93686	-1.162	0.46963	0.91486
novel_circ_0001492	4.38591	2.18773	0.97781	0.46061	0.91207
novel_circ_0001493	1.32268	4.63483	-1.5803	0.17376	0.71692
novel_circ_0001494	0.286537	2.6403	-2.5091	0.14554	NA
novel_circ_0001495	1.85805	2.96232	-0.75789	0.56689	0.93991
novel_circ_0001496	1.32963	0.326269	2.3427	0.31784	NA
novel_circ_0001497	0	2.45689	-3.373	0.052846	NA
novel_circ_0001498	0.749603	0.892953	-0.058011	0.98077	NA
novel_circ_0001499	1.00984	0.397006	1.2942	0.57113	NA
novel_circ_0001500	0	2.162	-3.2106	0.13333	NA
novel_circ_0001502	0	0.529825	-1.1709	0.70438	NA
novel_circ_0001503	0	0.360622	-0.73621	0.81255	NA
novel_circ_0001504	0	1.14311	-2.2865	0.42764	NA
novel_circ_0001506	1.56802	0	3.4779	0.17528	NA
novel_circ_0001507	1.78047	0.156592	2.7063	0.27804	NA
novel_circ_0001508	0.249868	0.601037	-0.4855	0.87447	NA
novel_circ_0001509	0.780099	0	2.5467	0.41004	NA
novel_circ_0001510	2.51323	2.94426	-0.19549	0.86541	0.98881
novel_circ_0001511	0	1.9611	-3.0463	0.12922	NA
novel_circ_0001512	1.21192	4.13287	-1.8209	0.10491	0.57611
novel_circ_0001513	1.67568	0.97979	0.78814	0.65417	NA
novel_circ_0001514	0	0.489404	-0.95906	0.75671	NA
novel_circ_0001515	0	0.264913	-0.22477	0.94246	NA
novel_circ_0001517	0	0.866781	-1.9161	0.53024	NA
novel_circ_0001518	0.499735	0.397369	0.59717	0.84654	NA
novel_circ_0001520	0	0.360622	-0.73621	0.81255	NA
novel_circ_0001521	0.374802	0.898412	-0.77759	0.7639	NA
novel_circ_0001522	1.46994	3.69885	-1.3397	0.28288	0.81949
novel_circ_0001524	3.04077	0.626366	2.2238	0.45579	0.90882
novel_circ_0001526	0.520066	0.264913	0.8126	0.79372	NA
novel_circ_0001527	0.58003	2.26731	-1.7896	0.26229	NA
novel_circ_0001529	0	0.489404	-0.95906	0.75671	NA
novel_circ_0001530	0	0.601037	-1.3668	0.65676	NA
novel_circ_0001531	0.374802	0	1.9491	0.53048	NA
novel_circ_0001536	0	0.499955	-0.95906	0.75671	NA
novel_circ_0001537	1.85418	0.548071	1.5918	0.45803	NA
novel_circ_0001538	0.499735	1.79199	-1.4836	0.41742	NA
novel_circ_0001539	0	0.264913	-0.22477	0.94246	NA
novel_circ_0001541	0.499735	0	2.1924	0.47961	NA
novel_circ_0001548	4.37103	5.8083	-0.32979	0.71609	0.96966
novel_circ_0001549	0.966717	4.34485	-2.0896	0.093748	0.54867
novel_circ_0001550	0	1.60314	-2.7764	0.23155	NA
novel_circ_0001551	4.58336	4.98911	-0.13098	0.89057	0.98996
novel_circ_0001552	1.29637	0.942304	0.54367	0.78564	NA
novel_circ_0001553	0	0.707262	-1.6019	0.6012	NA
novel_circ_0001554	1.63298	0.788848	1.06	0.58392	NA
novel_circ_0001556	7.2331	7.27698	-0.024377	0.96986	0.99914
novel_circ_0001558	0	0.612654	-1.4263	0.64252	NA
novel_circ_0001559	0.429805	1.75811	-1.6102	0.34405	NA
novel_circ_0001560	16.2926	12.9137	0.36225	0.41123	0.89086
novel_circ_0001561	5.3735	4.40618	0.32156	0.69518	0.96592
novel_circ_0001562	1.59139	0.69095	1.1764	0.54951	NA
novel_circ_0001565	0	0.313183	-0.64746	0.83495	NA
novel_circ_0001567	0.58003	0	2.2883	0.46021	NA
novel_circ_0001569	0	1.48975	-2.6585	0.26846	NA
novel_circ_0001571	0.85961	1.16656	-0.29913	0.90443	NA
novel_circ_0001572	0	1.3242	-2.5016	0.31594	NA
novel_circ_0001575	0	0.529825	-1.1709	0.70438	NA
novel_circ_0001579	0	0.591182	-1.3109	0.67021	NA
novel_circ_0001580	0.249868	0.98855	-1.1782	0.65238	NA
novel_circ_0001582	0.769934	2.32725	-1.5091	0.38279	0.87236
novel_circ_0001583	2.57255	3.91925	-0.69729	0.52248	0.93005
novel_circ_0001585	0.374802	0.815673	-0.58568	0.84167	NA
novel_circ_0001587	0	0.234887	-0.41502	0.8939	NA
novel_circ_0001588	108.992	161.2	-0.57112	0.0013303	0.041578
novel_circ_0001592	2.64684	3.61327	-0.42067	0.76506	0.9798
novel_circ_0001594	3.76105	3.54322	0.16613	0.86501	0.98881
novel_circ_0001595	0	0.692384	-1.5744	0.60761	NA
novel_circ_0001596	0.386687	0.652538	-0.40345	0.89426	NA
novel_circ_0001601	0.386687	2.61561	-2.4535	0.15222	NA
novel_circ_0001602	0.929541	2.29846	-1.1378	0.49372	0.92302
novel_circ_0001603	3.1793	4.38766	-0.39178	0.6736	0.96033
novel_circ_0001605	0.773374	0.831562	-0.043973	0.98405	NA
novel_circ_0001606	0	1.47391	-2.6805	0.31275	NA
novel_circ_0001607	1.41493	0.313183	1.9224	0.41337	NA
novel_circ_0001608	0.773374	0	2.5774	0.40427	NA
novel_circ_0001610	3.63733	2.10479	0.77905	0.55292	0.93788
novel_circ_0001611	0	1.51231	-2.681	0.26075	NA
novel_circ_0001613	0.286537	0.391479	0.093331	0.97594	NA
novel_circ_0001614	0	0.333303	-0.22477	0.94246	NA
novel_circ_0001615	0.716342	0.704662	0.11903	0.96539	NA
novel_circ_0001616	0	1.28906	-2.4676	0.32471	NA
novel_circ_0001617	0.286537	1.75439	-1.9324	0.30208	NA
novel_circ_0001618	1.97576	4.28054	-1.017	0.28985	0.81992
novel_circ_0001620	0	0.391479	-0.87237	0.77834	NA
novel_circ_0001621	0	0.879206	-1.9059	0.53248	NA
novel_circ_0001626	0.573074	0.331762	0.87366	0.77725	NA
novel_circ_0001638	6.14383	6.37819	-0.048898	0.93642	0.99845
novel_circ_0001640	0.429805	0.234887	0.86199	0.78101	NA
novel_circ_0001641	0	0.313183	-0.64746	0.83495	NA
novel_circ_0001643	4.18822	5.86567	-0.43799	0.54556	0.93524
novel_circ_0001645	0.780099	1.90786	-1.3272	0.45118	NA
novel_circ_0001647	6.84879	10.5308	-0.66041	0.27384	0.81696
novel_circ_0001648	1.30017	0.421504	1.5179	0.52294	NA
novel_circ_0001649	2.77082	1.65095	0.69121	0.59915	0.94484
novel_circ_0001650	0	0.931519	-1.9697	0.51857	NA
novel_circ_0001652	0	0.480829	-1.0532	0.73342	NA
novel_circ_0001653	3.31649	4.60866	-0.43329	0.608	0.94733
novel_circ_0001654	3.22155	6.04447	-0.81056	0.37784	0.87118
novel_circ_0001657	1.71837	0	3.6131	0.19173	NA
novel_circ_0001658	3.01649	3.50193	-0.18999	0.8719	0.98881
novel_circ_0001659	0	1.61259	-2.7843	0.2795	NA
novel_circ_0001662	1.25325	8.4837	-2.6324	0.0055375	0.11387
novel_circ_0001664	0	0.529825	-1.1709	0.70438	NA
novel_circ_0001665	0	0.499955	-0.95906	0.75671	NA
novel_circ_0001666	4.48069	1.44072	1.676	0.20305	0.75242
novel_circ_0001667	0.573074	0	2.3081	0.45624	NA
novel_circ_0001669	1.91896	0.901494	1.0946	0.56314	NA
novel_circ_0001671	0.859187	0	2.6378	0.39303	NA
novel_circ_0001672	0.716342	0	2.5243	0.41429	NA
novel_circ_0001674	0.58003	1.04991	-0.62394	0.79629	NA
novel_circ_0001676	0.716342	4.10763	-2.2784	0.096592	0.55598
novel_circ_0001677	3.72712	7.7368	-0.94665	0.25978	0.8075
novel_circ_0001680	0.679673	5.69452	-2.7039	0.013541	0.19471
novel_circ_0001681	0	0.326269	-0.22477	0.94246	NA
novel_circ_0001684	5.49003	5.73933	-0.078471	0.92108	0.99696
novel_circ_0001685	2.85466	2.64115	0.089475	0.93758	0.99845
novel_circ_0001687	20.0647	19.4733	0.014451	0.9703	0.99914
novel_circ_0001690	0.58003	2.48188	-1.8907	0.26468	0.81129
novel_circ_0001691	5.97942	10.5269	-0.85272	0.20802	0.76126
novel_circ_0001692	13.7673	11.7719	0.1967	0.74289	0.97662
novel_circ_0001693	32.3175	33.6653	-0.060681	0.82593	0.98881
novel_circ_0001694	0.806603	0.331762	1.1737	0.66264	NA
novel_circ_0001695	26.0877	12.7219	1.0517	0.036189	0.34018
novel_circ_0001696	2.4871	1.2576	0.91913	0.56466	0.93991
novel_circ_0001697	0	0.702004	-1.5926	0.60336	NA
novel_circ_0001698	3.14908	2.02381	0.70369	0.60642	0.94722
novel_circ_0001701	0	1.01316	-2.0984	0.48626	NA
novel_circ_0001702	0	0.264913	-0.22477	0.94246	NA
novel_circ_0001703	0.573074	0.93434	-0.43431	0.86042	NA
novel_circ_0001704	0.374802	0	1.9491	0.53048	NA
novel_circ_0001705	2.39354	1.95255	0.30576	0.84699	0.98881
novel_circ_0001706	1.79611	0.573718	1.7823	0.32024	NA
novel_circ_0001707	1.14615	0.391479	1.4631	0.58325	NA
novel_circ_0001708	1.14587	1.2212	-0.06321	0.97469	NA
novel_circ_0001713	27.3403	29.7083	-0.12927	0.72007	0.9705
novel_circ_0001714	1.42853	0.397369	1.7776	0.44388	NA
novel_circ_0001715	1.55347	5.35283	-1.8179	0.12377	0.62239
novel_circ_0001716	1.37925	3.81892	-1.4901	0.58756	0.94237
novel_circ_0001717	0	1.16656	-2.2925	0.45102	NA
novel_circ_0001719	3.24549	0	4.5413	0.015896	0.21207
novel_circ_0001720	20.5891	10.4295	0.96647	0.037863	0.34773
novel_circ_0001723	1.30017	1.61256	-0.34888	0.85381	NA
novel_circ_0001726	0.780099	0.264913	1.5516	0.60739	NA
novel_circ_0001728	2.58688	0.234887	2.9957	0.11333	NA
novel_circ_0001731	0	0.240415	-0.22477	0.94246	NA
novel_circ_0001732	0.374802	0	1.9491	0.53048	NA
novel_circ_0001733	1.14558	0	3.0223	0.32522	NA
novel_circ_0001734	0	0.659572	-1.4553	0.63562	NA
novel_circ_0001735	2.81661	2.64248	0.046017	0.97377	0.99914
novel_circ_0001736	1.16006	0.529825	1.1622	0.65589	NA
novel_circ_0001737	0	0.489404	-0.95906	0.75671	NA
novel_circ_0001738	6.62666	4.17248	0.64313	0.32631	0.84438
novel_circ_0001739	0	0.833258	-1.7985	0.55634	NA
novel_circ_0001740	2.11489	1.17475	0.89214	0.62674	0.95023
novel_circ_0001741	1.02324	0.156592	2.0297	0.43942	NA
novel_circ_0001744	7.50504	9.806	-0.31019	0.66227	0.95715
novel_circ_0001745	28.1987	26.0501	0.1197	0.71514	0.96947
novel_circ_0001748	0.85961	0.704036	0.41014	0.85381	NA
novel_circ_0001751	0	0.724291	-1.6215	0.59666	NA
novel_circ_0001752	0	0.552937	-1.2582	0.68302	NA
novel_circ_0001753	8.73451	9.61999	-0.10507	0.87349	0.98881
novel_circ_0001754	4.39731	2.82883	0.71265	0.4293	0.89619
novel_circ_0001756	1.57595	1.2061	0.4405	0.81608	NA
novel_circ_0001760	4.49573	4.48468	0.036721	0.96988	0.99914
novel_circ_0001768	0	0.234887	-0.41502	0.8939	NA
novel_circ_0001769	0.894868	0.548071	0.67113	0.7868	NA
novel_circ_0001773	3.91004	4.76627	-0.22053	0.77389	0.98091
novel_circ_0001776	0	0.46159	-1.0122	0.74353	NA
novel_circ_0001777	0	0.264913	-0.22477	0.94246	NA
novel_circ_0001779	1.43964	0	3.4263	0.19216	NA
novel_circ_0001780	0.624669	0.264913	1.4074	0.64907	NA
novel_circ_0001784	20.0884	22.3249	-0.13163	0.70451	0.96713
novel_circ_0001785	8.88805	8.12787	0.15867	0.82851	0.98881
novel_circ_0001786	0.58003	0	2.2883	0.46021	NA
novel_circ_0001788	0.499735	1.31231	-0.99268	0.61599	NA
novel_circ_0001789	2.63101	3.4661	-0.32882	0.73617	0.97476
novel_circ_0001790	0.573074	2.09728	-1.5677	0.37349	NA
novel_circ_0001791	1.49809	0.469775	1.506	0.50653	NA
novel_circ_0001792	0	0.391479	-0.87237	0.77834	NA
novel_circ_0001793	0	0.156592	-0.13772	0.96473	NA
novel_circ_0001794	0	1.30557	-2.4575	0.32819	NA
novel_circ_0001798	1.3534	1.63769	-0.21611	0.90912	NA
novel_circ_0001799	0.499735	1.93909	-1.5892	0.41745	NA
novel_circ_0001800	0.499735	0	2.1924	0.47961	NA
novel_circ_0001801	0.499735	0	2.1924	0.47961	NA
novel_circ_0001802	1.57137	4.10823	-1.5896	0.21232	0.76344
novel_circ_0001803	0.286537	0	1.7347	0.57724	NA
novel_circ_0001804	0.804607	2.44039	-1.343	0.3396	0.85363
novel_circ_0001805	2.02319	1.25896	0.71786	0.6434	0.95181
novel_circ_0001806	0.572792	1.13539	-1.2803	0.54989	NA
novel_circ_0001807	0	0.313183	-0.64746	0.83495	NA
novel_circ_0001808	0.573074	1.46716	-1.1017	0.58933	NA
novel_circ_0001810	0.374802	3.599	-2.7003	0.068673	0.46989
novel_circ_0001812	1.10948	3.23457	-1.3592	0.28871	0.81964
novel_circ_0001813	0	1.31106	-2.4719	0.27617	NA
novel_circ_0001815	15.0631	17.7877	-0.19292	0.68028	0.96204
novel_circ_0001817	1.05991	0.673805	0.6524	0.76041	NA
novel_circ_0001818	1.35892	0.156592	2.3943	0.32257	NA
novel_circ_0001819	0.429805	0.877721	-0.60889	0.79593	NA
novel_circ_0001820	0.499735	0.264913	1.1986	0.69889	NA
novel_circ_0001821	18.2254	19.9533	-0.10481	0.78975	0.98564
novel_circ_0001822	8.4359	4.28197	0.98398	0.24805	0.79804
novel_circ_0001823	3.64823	7.31338	-0.85131	0.35328	0.86646
novel_circ_0001826	0	0.831562	-1.8446	0.52506	NA
novel_circ_0001827	0.773374	0.724782	0.16802	0.9456	NA
novel_circ_0001828	0	1.14475	-2.3114	0.37282	NA
novel_circ_0001830	2.95565	2.46189	0.20115	0.86384	0.98881
novel_circ_0001831	7.89852	4.88887	0.64822	0.36999	0.87057
novel_circ_0001832	0.624669	1.10844	-0.55637	0.77943	NA
novel_circ_0001833	0	0.234887	-0.41502	0.8939	NA
novel_circ_0001834	0	0.480829	-1.0532	0.73342	NA
novel_circ_0001836	3.0958	6.6951	-1.0312	0.2742	0.81696
novel_circ_0001837	0.249868	1.32218	-1.6357	0.49633	NA
novel_circ_0001838	3.92902	5.42349	-0.42264	0.62797	0.95023
novel_circ_0001840	0	1.76562	-2.9324	0.19889	NA
novel_circ_0001841	4.06866	3.61998	0.15235	0.88033	0.98993
novel_circ_0001842	15.0061	30.3251	-0.96873	0.019027	0.23646
novel_circ_0001843	0.249868	0	1.6503	0.59614	NA
novel_circ_0001844	0	0.9151	-1.9594	0.48762	NA
novel_circ_0001845	0.966717	0.264913	1.8578	0.51478	NA
novel_circ_0001846	0.286537	0.156592	0.82798	0.79008	NA
novel_circ_0001847	0.573074	0	2.3081	0.45624	NA
novel_circ_0001848	0.661338	0.469775	0.60462	0.82148	NA
novel_circ_0001849	1.06828	0.333303	1.611	0.55946	NA
novel_circ_0001853	4.90664	14.9284	-1.6563	0.0093761	0.15528
novel_circ_0001854	0.859187	3.34099	-2.1235	0.22722	0.77867
novel_circ_0001855	0	0.552937	-1.2582	0.68302	NA
novel_circ_0001857	0	2.42353	-3.3586	0.077449	NA
novel_circ_0001861	0.374802	0	1.9491	0.53048	NA
novel_circ_0001863	0	0.578096	-1.3305	0.66548	NA
novel_circ_0001864	0.374802	1.56879	-1.5663	0.45217	NA
novel_circ_0001868	1.0026	10.1656	-3.3402	0.00057069	0.022801
novel_circ_0001870	0	0.945439	-2.0315	0.50526	NA
novel_circ_0001874	0	0.601037	-1.3668	0.65676	NA
novel_circ_0001875	0	0.234887	-0.41502	0.8939	NA
novel_circ_0001877	0.58003	0	2.2883	0.46021	NA
novel_circ_0001878	10.0197	8.94021	0.21322	0.7251	0.97181
novel_circ_0001880	0.716342	0	2.5243	0.41429	NA
novel_circ_0001881	0.249868	0	1.6503	0.59614	NA
novel_circ_0001883	0	0.360622	-0.73621	0.81255	NA
novel_circ_0001884	1.04013	0	2.9037	0.34536	NA
novel_circ_0001885	7.19418	6.58027	0.11896	0.8683	0.98881
novel_circ_0001886	0	0.391479	-0.87237	0.77834	NA
novel_circ_0001887	1.53987	0.986988	0.59549	0.75694	NA
novel_circ_0001890	2.14903	1.85808	0.25539	0.88379	0.98993
novel_circ_0001891	6.09066	13.9868	-1.2112	0.059829	0.43437
novel_circ_0001892	1.19746	1.23063	0.0068735	0.99696	NA
novel_circ_0001893	0	2.90361	-3.619	0.025012	NA
novel_circ_0001894	2.17813	0.666606	1.8272	0.32899	NA
novel_circ_0001896	0.429805	0	2.046	0.50999	NA
novel_circ_0001897	0	0.782958	-1.7818	0.56008	NA
novel_circ_0001900	56.4511	44.1	0.37227	0.27229	0.81696
novel_circ_0001901	0	2.24618	-3.263	0.059225	NA
novel_circ_0001902	2.77871	4.42197	-0.62748	0.51068	0.92844
novel_circ_0001903	0	0.264913	-0.22477	0.94246	NA
novel_circ_0001904	3.42568	1.6348	1.1341	0.40083	0.88613
novel_circ_0001909	0	0.499955	-0.95906	0.75671	NA
novel_circ_0001910	0	0.77024	-1.7158	0.57502	NA
novel_circ_0001911	0	0.489404	-0.95906	0.75671	NA
novel_circ_0001912	1.74631	1.77115	0.04152	0.97813	0.99914
novel_circ_0001913	2.8209	0.534358	2.2391	0.17498	0.71817
novel_circ_0001914	0.661338	1.14837	-0.57619	0.78862	NA
novel_circ_0001915	1.19774	1.66238	-0.29944	0.85033	NA
novel_circ_0001918	1.00984	3.95378	-1.845	0.18318	0.72934
novel_circ_0001919	0	0.221175	-0.22477	0.94246	NA
novel_circ_0001920	0	0.841451	-1.8501	0.5448	NA
novel_circ_0001921	0	1.05965	-2.1738	0.47528	NA
novel_circ_0001923	0.572792	0.548071	-0.25201	0.9318	NA
novel_circ_0001924	2.06923	2.91681	-0.49475	0.70073	0.96635
novel_circ_0001925	0.374802	0.598216	-0.13803	0.9613	NA
novel_circ_0001926	5.99736	5.49368	0.15743	0.81228	0.98881
novel_circ_0001927	5.7609	6.9819	-0.22257	0.74597	0.97685
novel_circ_0001928	3.24135	1.94134	0.76144	0.54636	0.93524
novel_circ_0001929	4.75611	1.89843	1.3177	0.27875	0.81696
novel_circ_0001930	2.35727	1.67356	0.39082	0.77371	0.98091
novel_circ_0001931	6.65224	5.99608	0.11517	0.87516	0.98888
novel_circ_0001932	0.286537	0	1.7347	0.57724	NA
novel_circ_0001933	0.499735	0.932799	-0.56617	0.82064	NA
novel_circ_0001934	0.286537	1.76963	-1.9538	0.29194	NA
novel_circ_0001936	2.36854	7.02497	-1.5672	0.058777	0.43038
novel_circ_0001937	10.2539	12.8058	-0.31742	0.51067	0.92844
novel_circ_0001939	220.926	159.081	0.47357	0.68076	0.96225
novel_circ_0001940	0	0.44235	-0.9701	0.75397	NA
novel_circ_0001941	0	0.156592	-0.13772	0.96473	NA
novel_circ_0001942	0.249868	0	1.6503	0.59614	NA
novel_circ_0001943	0.374802	0.881374	-0.74169	0.77599	NA
novel_circ_0001944	8.0646	10.5135	-0.38938	0.54743	0.93524
novel_circ_0001945	0.859187	1.16656	-0.469	0.85153	NA
novel_circ_0001947	3.72285	1.41071	1.4341	0.2548	0.80406
novel_circ_0001948	0.520066	0	1.8063	0.56141	NA
novel_circ_0001949	1.39601	0.552937	1.3727	0.54481	NA
novel_circ_0001950	2.58395	0.480829	2.405	0.15447	0.68627
novel_circ_0001951	0.386687	2.3868	-2.3272	0.14176	NA
novel_circ_0001952	1.14615	8.55973	-2.6421	0.0093898	0.15528
novel_circ_0001953	2.06975	2.16655	0.016964	0.99062	0.99971
novel_circ_0001955	21.1162	33.9077	-0.67651	0.040564	0.35974
novel_circ_0001962	0	0.666606	-1.4692	0.63233	NA
novel_circ_0001965	11.0204	11.2636	-0.076759	0.8702	0.98881
novel_circ_0001966	0.499735	2.22656	-1.7621	0.3175	NA
novel_circ_0001967	0	0.715717	-1.6304	0.5946	NA
novel_circ_0001968	0.520066	1.2789	-1.4283	0.53741	NA
novel_circ_0001969	13.7042	7.99744	0.80666	0.13917	0.65458
novel_circ_0001975	0	0.753266	-1.6993	0.57291	NA
novel_circ_0001976	1.53979	0.724291	1.1491	0.56222	NA
novel_circ_0001977	1.44308	2.22452	-0.7683	0.60438	0.94714
novel_circ_0001978	6.98982	12.7076	-0.8927	0.11026	0.59111
novel_circ_0001979	3.42598	1.73429	0.95735	0.534	0.93005
novel_circ_0001980	0	0.326269	-0.22477	0.94246	NA
novel_circ_0001982	11.4502	12.4295	-0.11209	0.82586	0.98881
novel_circ_0001983	151.099	144.586	0.064553	0.7396	0.97605
novel_circ_0001984	0.749603	1.75891	-1.022	0.60214	NA
novel_circ_0001987	4.00133	2.60346	0.62885	0.49001	0.92204
novel_circ_0001988	1.60705	1.87904	-0.3369	0.80824	0.98881
novel_circ_0001989	2.13902	0.658031	1.7122	0.32433	NA
novel_circ_0001990	11.8055	23.2796	-0.96901	0.47829	0.91711
novel_circ_0001991	4.54265	10.5463	-1.1736	0.083603	0.52576
novel_circ_0001992	1.20318	2.04951	-0.69339	0.67699	0.96126
novel_circ_0001993	0.773374	0.663525	0.28772	0.91646	NA
novel_circ_0001995	0.429805	0	2.046	0.50999	NA
novel_circ_0001996	0	0.221175	-0.22477	0.94246	NA
novel_circ_0001998	5.22599	4.10478	0.36313	0.68912	0.96513
novel_circ_0002000	0	0.704662	-1.634	0.59378	NA
novel_circ_0002001	1.77025	3.27681	-0.88659	0.56571	0.93991
novel_circ_0002002	0.624669	0.331762	0.96666	0.75408	NA
novel_circ_0002005	0	1.09817	-2.2078	0.45265	NA
novel_circ_0002006	0.386687	0	1.8063	0.56141	NA
novel_circ_0002007	1.14474	2.03288	-0.7221	0.61549	0.94902
novel_circ_0002008	1.3534	0	3.3148	0.26738	NA
novel_circ_0002009	0.499735	0.815673	-0.33698	0.90531	NA
novel_circ_0002010	0.249868	0.663525	-0.63702	0.8354	NA
novel_circ_0002013	0.773374	0	2.5774	0.40427	NA
novel_circ_0002014	0	0.553598	-1.2765	0.67856	NA
novel_circ_0002015	0.249868	0.489895	-0.14776	0.96187	NA
novel_circ_0002016	0	0.156592	-0.13772	0.96473	NA
novel_circ_0002019	0	0.721244	-1.6286	0.59501	NA
novel_circ_0002020	1.32963	2.09396	-0.53677	0.69498	0.96592
novel_circ_0002021	0.624669	1.31935	-0.79679	0.70583	NA
novel_circ_0002022	5.24311	1.03377	2.3006	0.076373	0.502
novel_circ_0002024	0	0.666606	-1.4692	0.63233	NA
novel_circ_0002025	6.68361	11.1236	-0.70734	0.21015	0.76257
novel_circ_0002027	10.5489	2.53348	2.0826	0.010462	0.16514
novel_circ_0002031	36.3065	16.514	1.1572	0.0043117	0.098353
novel_circ_0002032	3.90463	0.240415	3.8676	0.020782	0.25225
novel_circ_0002033	3.14752	1.34178	1.1997	0.3933	0.88296
novel_circ_0002034	0.85961	0	2.7326	0.3756	NA
novel_circ_0002036	1.28942	0	3.271	0.28066	NA
novel_circ_0002038	0.499735	0	2.1924	0.47961	NA
novel_circ_0002039	3.67603	5.14785	-0.40626	0.69965	0.96635
novel_circ_0002046	15.7136	29.5262	-0.84457	0.041911	0.365
novel_circ_0002047	3.0048	1.85563	0.71435	0.61016	0.94877
novel_circ_0002051	1.16006	3.11426	-1.3539	0.35168	0.86584
novel_circ_0002056	0	0.360622	-0.73621	0.81255	NA
novel_circ_0002059	10.9937	6.95258	0.58447	0.33704	0.85297
novel_circ_0002061	2.61204	1.21567	1.1136	0.44619	0.90439
novel_circ_0002063	0	0.234887	-0.41502	0.8939	NA
novel_circ_0002064	159.504	98.5253	0.69157	0.012118	0.18209
novel_circ_0002065	0.773374	0	2.5774	0.40427	NA
novel_circ_0002069	0.374802	0	1.9491	0.53048	NA
novel_circ_0002071	2.12678	2.02684	0.0669	0.98188	0.99914
novel_circ_0002072	1.99618	2.38034	-0.18758	0.895	0.9909
novel_circ_0002073	0	0.631894	-1.4656	0.63318	NA
novel_circ_0002074	1.09114	3.50336	-1.4415	0.20994	0.76257
novel_circ_0002075	10.3688	17.3385	-0.74869	0.12789	0.63245
novel_circ_0002078	22.2361	19.5669	0.19957	0.62588	0.95023
novel_circ_0002080	1.14615	0.482861	1.3384	0.57764	NA
novel_circ_0002084	0	0.240415	-0.22477	0.94246	NA
novel_circ_0002086	3.89139	4.2728	-0.1968	0.83585	0.98881
novel_circ_0002089	0	0.998369	-2.0771	0.49275	NA
novel_circ_0002090	13.3072	8.39428	0.6844	0.30509	0.83498
novel_circ_0002091	0	0.995287	-2.098	0.49111	NA
novel_circ_0002095	1.21658	0.710552	0.78672	0.70491	NA
novel_circ_0002096	0	0.360622	-0.73621	0.81255	NA
novel_circ_0002103	2.45785	0.221175	3.1622	0.094026	NA
novel_circ_0002105	0	0.240415	-0.22477	0.94246	NA
novel_circ_0002107	0	0.360622	-0.73621	0.81255	NA
novel_circ_0002108	1.82023	0.331762	2.27	0.35156	NA
novel_circ_0002110	0.624669	1.51316	-1.0377	0.60575	NA
novel_circ_0002112	0	2.11517	-3.1787	0.10312	NA
novel_circ_0002113	1.23399	1.25095	-0.01284	0.99432	NA
novel_circ_0002114	0	0.928437	-1.994	0.5133	NA
novel_circ_0002115	1.48386	2.2412	-0.59293	0.66199	0.95715
novel_circ_0002119	13.1653	5.99808	1.1005	0.12399	0.62239
novel_circ_0002120	0.374802	0	1.9491	0.53048	NA
novel_circ_0002122	0.58003	0	2.2883	0.46021	NA
novel_circ_0002123	0	0.331762	-0.6655	0.83039	NA
novel_circ_0002124	9.18077	28.4691	-1.6429	0.00035911	0.016752
novel_circ_0002126	9.18737	22.5827	-1.3363	0.0062901	0.12236
novel_circ_0002129	0.780099	0	2.5467	0.41004	NA
novel_circ_0002131	4.97862	3.84539	0.38075	0.66407	0.95715
novel_circ_0002132	0	2.30756	-3.3059	0.079201	NA
novel_circ_0002138	0	1.05965	-2.1738	0.47528	NA
novel_circ_0002139	6.37644	10.4197	-0.7094	0.22399	0.77497
novel_circ_0002140	0	0.666606	-1.4692	0.63233	NA
novel_circ_0002141	4.84996	5.45039	-0.17477	0.83239	0.98881
novel_circ_0002142	5.09826	1.43971	1.8196	0.099035	0.56228
novel_circ_0002143	0.374802	0.601037	-0.18662	0.95147	NA
novel_circ_0002144	0.249868	0	1.6503	0.59614	NA
novel_circ_0002146	0.58003	0.734687	-0.17105	0.94674	NA
novel_circ_0002147	2.35752	1.22657	0.96027	0.55918	0.93991
novel_circ_0002148	7.12623	10.6515	-0.57048	0.33091	0.84804
novel_circ_0002149	1.95923	1.36553	0.5848	0.72234	0.97181
novel_circ_0002150	4.29753	3.81212	0.21516	0.79671	0.98759
novel_circ_0002151	4.16087	5.47538	-0.31313	0.74773	0.97685
novel_circ_0002160	1.07977	1.85201	-0.70107	0.67778	NA
novel_circ_0002163	0	0.666606	-1.4692	0.63233	NA
novel_circ_0002165	0.712187	3.2454	-2.7767	0.059716	0.43437
novel_circ_0002167	0	2.99973	-3.6895	0.020649	NA
novel_circ_0002169	17.2246	16.6825	-0.00041187	0.99918	0.99997
novel_circ_0002170	0.499735	0.333303	1.1986	0.69889	NA
novel_circ_0002171	2.16474	0.499955	2.4116	0.16883	NA
novel_circ_0002172	4.39268	2.04526	1.1574	0.29056	0.82037
novel_circ_0002173	0.386687	0	1.8063	0.56141	NA
novel_circ_0002175	0	1.14311	-2.2865	0.42764	NA
novel_circ_0002176	12.133	4.05173	1.5892	0.052933	0.41258
novel_circ_0002177	5.97193	0	5.4409	0.071257	0.4805
novel_circ_0002179	0.58003	0	2.2883	0.46021	NA
novel_circ_0002182	0	0.264913	-0.22477	0.94246	NA
novel_circ_0002183	1.14615	2.57794	-1.0402	0.52015	0.93005
novel_circ_0002186	0.966717	3.97804	-1.9681	0.1645	0.70594
novel_circ_0002188	0	0.313183	-0.64746	0.83495	NA
novel_circ_0002189	15.1627	19.8452	-0.41012	0.38562	0.87622
novel_circ_0002190	0.749603	0	2.5847	0.4029	NA
novel_circ_0002192	2.8126	1.30508	1.1402	0.48251	0.92083
novel_circ_0002193	0	3.91969	-4.0487	0.015914	0.21207
novel_circ_0002198	0	2.40643	-3.3605	0.14159	NA
novel_circ_0002199	0	0.931753	-1.9839	0.51549	NA
novel_circ_0002200	1.89547	2.94646	-0.53229	0.64145	0.95181
novel_circ_0002201	8.30369	8.55983	-0.005243	0.99364	0.99971
novel_circ_0002203	0.429805	1.31216	-1.1936	0.54641	NA
novel_circ_0002205	12.2999	13.237	-0.042299	0.94064	0.99845
novel_circ_0002206	3.92402	2.9734	0.37281	0.71238	0.96762
novel_circ_0002207	4.21815	5.96619	-0.5197	0.46712	0.91379
novel_circ_0002208	1.71837	0.839719	0.97302	0.64774	NA
novel_circ_0002212	0	0.360622	-0.73621	0.81255	NA
novel_circ_0002214	1.34301	3.46901	-1.2672	0.27707	0.81696
novel_circ_0002219	6.23636	4.17543	0.52237	0.48114	0.91969
novel_circ_0002221	0	0.156592	-0.13772	0.96473	NA
novel_circ_0002222	0.573074	0	2.3081	0.45624	NA
novel_circ_0002223	0.573074	0.240415	1.3144	0.6711	NA
novel_circ_0002224	0	0.156592	-0.13772	0.96473	NA
novel_circ_0002226	0.573074	0.156592	1.4014	0.65082	NA
novel_circ_0002227	1.4324	0.529825	1.4677	0.51861	NA
novel_circ_0002229	1.32239	0.812983	0.67957	0.73679	NA
novel_circ_0002230	1.17941	0.928813	0.46504	0.80121	NA
novel_circ_0002231	1.96465	1.47206	0.38392	0.78675	0.98467
novel_circ_0002232	2.29032	2.14485	0.068684	0.95825	0.99914
novel_circ_0002233	2.02068	3.48614	-0.62325	0.61158	0.94902
novel_circ_0002234	0.58003	0	2.2883	0.46021	NA
novel_circ_0002235	34.589	53.2604	-0.63465	0.03023	0.30928
novel_circ_0002240	0.966717	0.456062	1.0478	0.67501	NA
novel_circ_0002243	0.429805	1.00513	-0.82743	0.71644	NA
novel_circ_0002244	4.94051	2.14252	1.2009	0.26536	0.81152
novel_circ_0002245	1.30017	0.553598	1.1379	0.62288	NA
novel_circ_0002249	0.573074	0.860422	-0.34038	0.88096	NA
novel_circ_0002255	1.39601	0.833829	0.77304	0.69664	NA
novel_circ_0002257	0.749603	3.11343	-1.7547	0.19709	0.74425
novel_circ_0002258	0.966717	0.865949	0.19747	0.93245	NA
novel_circ_0002259	0.966717	0.469775	0.99759	0.71499	NA
novel_circ_0002260	0	0.397369	-0.8262	0.78991	NA
novel_circ_0002261	0	0.331762	-0.6655	0.83039	NA
novel_circ_0002262	2.9235	1.78522	0.79232	0.50206	0.92552
novel_circ_0002263	6.72366	2.39464	1.5621	0.045641	0.37914
novel_circ_0002265	31.9172	27.8545	0.20794	0.51095	0.92844
novel_circ_0002266	0	0.326269	-0.22477	0.94246	NA
novel_circ_0002268	1.49229	0.692384	1.0013	0.62276	NA
novel_circ_0002269	0	0.819391	-1.7948	0.54158	NA
novel_circ_0002270	0	0.360622	-0.73621	0.81255	NA
novel_circ_0002271	0.572792	1.04402	-1.1247	0.63801	NA
novel_circ_0002272	1.6789	0.360622	2.0827	0.35606	NA
novel_circ_0002273	1.99496	0	3.8657	0.071841	NA
novel_circ_0002274	31.1197	25.2914	0.28542	0.44023	0.90077
novel_circ_0002275	0.499735	0.965721	-0.59654	0.80982	NA
novel_circ_0002278	0	0.234887	-0.41502	0.8939	NA
novel_circ_0002279	3.68032	3.58489	-0.042125	0.96519	0.99914
novel_circ_0002282	2.70782	3.78803	-0.38237	0.69875	0.96635
novel_circ_0002284	0.712187	0	1.8063	0.56141	NA
novel_circ_0002285	0.773374	1.75353	-1.0675	0.58646	NA
novel_circ_0002286	0.773374	0.913559	-0.16685	0.94407	NA
novel_circ_0002288	0.249868	2.92006	-2.7272	0.054092	0.41733
novel_circ_0002290	0	0.656392	-1.5137	0.62183	NA
novel_circ_0002291	1.78938	1.24389	0.48784	0.77374	0.98091
novel_circ_0002294	2.97909	2.95097	0.029862	0.97769	0.99914
novel_circ_0002297	0	1.37286	-2.541	0.30241	NA
novel_circ_0002298	0	0.397369	-0.8262	0.78991	NA
novel_circ_0002300	2.62858	0	4.2483	0.019458	NA
novel_circ_0002301	0.249868	0	1.6503	0.59614	NA
novel_circ_0002302	3.28581	0.326269	3.5707	0.043316	0.36908
novel_circ_0002303	0.374802	0	1.9491	0.53048	NA
novel_circ_0002304	5.04683	3.7129	0.50434	0.64556	0.95286
novel_circ_0002305	0	0.626366	-1.4691	0.63234	NA
novel_circ_0002311	1.0198	0	2.9176	0.32635	NA
novel_circ_0002313	2.92356	1.60045	0.84681	0.52262	0.93005
novel_circ_0002314	1.89519	1.18283	0.67077	0.7177	0.96988
novel_circ_0002318	0	0.548071	-1.2829	0.67702	NA
novel_circ_0002319	13.557	10.6521	0.31941	0.52411	0.93005
novel_circ_0002320	5.20472	6.64371	-0.31508	0.65045	0.95513
novel_circ_0002321	1.88589	2.92886	-0.49906	0.69259	0.96541
novel_circ_0002322	31.8863	35.4648	-0.18514	0.55779	0.93991
novel_circ_0002323	0.374802	0.234887	0.76513	0.80521	NA
novel_circ_0002324	0	1.62612	-2.8054	0.22808	NA
novel_circ_0002326	0	1.13638	-2.2767	0.42968	NA
novel_circ_0002328	0	0.221175	-0.22477	0.94246	NA
novel_circ_0002329	0.374802	0	1.9491	0.53048	NA
novel_circ_0002330	1.42437	0.156592	2.378	0.36946	NA
novel_circ_0002331	0	0.652538	-1.4413	0.63895	NA
novel_circ_0002332	0	1.06815	-2.1755	0.46158	NA
novel_circ_0002333	1.38928	0.499955	1.7022	0.42204	NA
novel_circ_0002336	0	0.601037	-1.3668	0.65676	NA
novel_circ_0002337	2.00477	1.42313	0.4442	0.80791	0.98881
novel_circ_0002338	0.286537	0.99631	-1.1388	0.62566	NA
novel_circ_0002340	12.7167	9.6601	0.37981	0.41483	0.89101
novel_circ_0002341	0.499735	0.896961	-0.4761	0.83648	NA
novel_circ_0002342	0.286537	0.44235	-0.0043962	0.99887	NA
novel_circ_0002343	0	0.333303	-0.22477	0.94246	NA
novel_circ_0002344	7.3415	8.91056	-0.29474	0.66562	0.95717
novel_circ_0002346	0	0.71019	-1.6322	0.59418	NA
novel_circ_0002347	0.624669	0	2.4011	0.43793	NA
novel_circ_0002349	0	0.221175	-0.22477	0.94246	NA
novel_circ_0002354	1.2047	1.54241	-0.25499	0.88336	NA
novel_circ_0002355	2.1464	3.40323	-0.61772	0.53998	0.93372
novel_circ_0002356	32.8701	54.9487	-0.73621	0.0081794	0.14203
novel_circ_0002357	0	3.85346	-4.0186	0.0093035	0.15467
novel_circ_0002358	4.18354	3.85999	0.021339	0.97904	0.99914
novel_circ_0002359	0	1.69706	-2.8591	0.2174	NA
novel_circ_0002360	0	0.489404	-0.95906	0.75671	NA
novel_circ_0002361	0.679673	0	2.4752	0.42366	NA
novel_circ_0002367	1.2099	4.99208	-2.0386	0.055132	0.42131
novel_circ_0002370	0	0.360622	-0.73621	0.81255	NA
novel_circ_0002371	0	0.764867	-1.6829	0.58254	NA
novel_circ_0002373	11.7224	12.8309	-0.15741	0.75557	0.97813
novel_circ_0002375	0.999471	0.99991	0.12886	0.95877	NA
novel_circ_0002377	1.52038	1.33167	0.20115	0.91581	NA
novel_circ_0002379	2.01967	2.32573	-0.13939	0.91364	0.99462
novel_circ_0002380	0.780099	0	2.5467	0.41004	NA
novel_circ_0002381	0	0.326269	-0.22477	0.94246	NA
novel_circ_0002382	0	0.601037	-1.3668	0.65676	NA
novel_circ_0002384	1.28601	1.13208	0.33767	0.83902	NA
novel_circ_0002385	0	1.54798	-2.7194	0.29627	NA
novel_circ_0002390	0	0.360622	-0.73621	0.81255	NA
novel_circ_0002392	0.374802	1.89119	-1.8046	0.37036	NA
novel_circ_0002393	0	0.658031	-1.4809	0.62955	NA
novel_circ_0002394	3.84428	3.68572	0.038556	0.9686	0.99914
novel_circ_0002395	1.58835	1.02374	0.48559	0.80252	NA
novel_circ_0002396	2.97923	4.39776	-0.53759	0.55407	0.93888
novel_circ_0002397	0.966717	4.13973	-2.0162	0.11339	0.60071
novel_circ_0002398	0.286537	0.264913	0.74093	0.81165	NA
novel_circ_0002399	0	0.313183	-0.64746	0.83495	NA
novel_circ_0002401	20.338	29.1185	-0.52494	0.28803	0.81961
novel_circ_0002402	2.74162	3.43532	-0.36587	0.7449	0.97685
novel_circ_0002404	1.09314	1.14475	-0.0732	0.96812	NA
novel_circ_0002405	1.28526	0.475302	1.3297	0.53527	NA
novel_circ_0002406	0	0.720975	-1.6395	0.59216	NA
novel_circ_0002407	10.267	10.3815	0.0037203	0.99486	0.99971
novel_circ_0002409	0.58003	0.480829	0.46572	0.87777	NA
novel_circ_0002410	0.947593	0.221175	1.8159	0.49029	NA
novel_circ_0002411	1.8802	4.43609	-1.2634	0.34399	0.86012
novel_circ_0002412	0	0.601037	-1.3668	0.65676	NA
novel_circ_0002413	1.30017	0	3.2223	0.28851	NA
novel_circ_0002414	0.624669	3.16118	-1.9848	0.13982	0.65576
novel_circ_0002415	0	0.221175	-0.22477	0.94246	NA
novel_circ_0002416	0	0.326269	-0.22477	0.94246	NA
novel_circ_0002417	0	0.331762	-0.6655	0.83039	NA
novel_circ_0002418	0.573074	0.333303	1.3144	0.6711	NA
novel_circ_0002420	3.03631	2.02721	0.59345	0.61436	0.94902
novel_circ_0002421	3.78662	0.754316	2.432	0.089099	0.53927
novel_circ_0002422	16.2529	17.8934	-0.089641	0.83964	0.98881
novel_circ_0002424	1.65284	3.97671	-1.0647	0.28628	0.81961
novel_circ_0002426	0	1.18236	-2.3206	0.41672	NA
novel_circ_0002427	0.386687	0	1.8063	0.56141	NA
novel_circ_0002428	0.286537	1.50498	-1.7272	0.45712	NA
novel_circ_0002430	0	0.234887	-0.41502	0.8939	NA
novel_circ_0002432	0	0.796044	-1.7772	0.56111	NA
novel_circ_0002433	0.712187	0.686417	-0.53201	0.83213	NA
novel_circ_0002434	2.25571	2.30163	-0.013019	0.99203	0.99971
novel_circ_0002437	3.54273	3.10489	0.25901	0.79476	0.9865
novel_circ_0002441	0.624669	1.30303	-0.80951	0.72331	NA
novel_circ_0002444	0	0.87434	-1.9138	0.53076	NA
novel_circ_0002452	0	0.662281	-1.494	0.62647	NA
novel_circ_0002453	38.219	14.0979	1.4529	0.00045322	0.018927
novel_circ_0002455	2.88288	0.234887	3.1883	0.078982	0.50951
novel_circ_0002456	0.286537	0	1.7347	0.57724	NA
novel_circ_0002457	18.3866	14.5423	0.3365	0.41846	0.89101
novel_circ_0002461	1.36013	1.29844	0.061627	0.97231	NA
novel_circ_0002465	2.13656	0	3.8971	0.13244	NA
novel_circ_0002466	0	0.331762	-0.6655	0.83039	NA
novel_circ_0002468	0.966717	2.16184	-1.1166	0.47448	0.916
novel_circ_0002470	3.73703	6.29575	-0.7549	0.35753	0.86827
novel_circ_0002473	0.249868	1.77617	-2.0347	0.27951	NA
novel_circ_0002474	0	0.264913	-0.22477	0.94246	NA
novel_circ_0002475	1.86108	2.01422	-0.045731	0.97478	0.99914
novel_circ_0002476	0	0.397369	-0.8262	0.78991	NA
novel_circ_0002477	0.520066	0	1.8063	0.56141	NA
novel_circ_0002478	1.14615	0.313183	1.6906	0.53366	NA
novel_circ_0002479	1.71922	0.794738	1.1718	0.61505	NA
novel_circ_0002480	0.85961	0	2.7326	0.3756	NA
novel_circ_0002481	0.780099	0	2.5467	0.41004	NA
novel_circ_0002482	0.499735	1.09647	-0.79129	0.7188	NA
novel_circ_0002483	0.58003	1.15619	-0.81343	0.72952	NA
novel_circ_0002484	0	2.717	-3.5343	0.051905	NA
novel_circ_0002487	0.749603	0.745742	0.16611	0.94628	NA
novel_circ_0002488	5.58209	9.23691	-0.69135	0.23717	0.78857
novel_circ_0002489	1.42437	1.12533	0.17294	0.92939	NA
novel_circ_0002490	0	0.156592	-0.13772	0.96473	NA
novel_circ_0002491	2.41331	1.27557	0.94845	0.5964	0.94484
novel_circ_0002492	1.14615	0	3.1048	0.31158	NA
novel_circ_0002493	1.16006	0.264913	2.1061	0.43879	NA
novel_circ_0002500	5.21129	2.95425	0.80507	0.40697	0.88889
novel_circ_0002501	2.76575	2.79388	-0.081144	0.94422	0.99845
novel_circ_0002502	0	0.156592	-0.13772	0.96473	NA
novel_circ_0002503	0	0.264913	-0.22477	0.94246	NA
novel_circ_0002504	0	2.2438	-3.2589	0.11986	NA
novel_circ_0002505	1.06828	2.55199	-1.7983	0.23809	0.78857
novel_circ_0002506	1.52298	2.81474	-0.79617	0.56934	0.93991
novel_circ_0002508	0	0.397369	-0.8262	0.78991	NA
novel_circ_0002509	16.0543	23.758	-0.58698	0.16707	0.70843
novel_circ_0002510	5.44518	2.67343	0.95456	0.3812	0.87166
novel_circ_0002511	0	0.234887	-0.41502	0.8939	NA
novel_circ_0002512	1.04013	3.03061	-1.6196	0.30426	0.83364
novel_circ_0002513	0	1.35903	-2.5383	0.35175	NA
novel_circ_0002514	0	0.240415	-0.22477	0.94246	NA
novel_circ_0002515	4.03762	3.77406	0.030273	0.97838	0.99914
novel_circ_0002516	0	8.22106	-5.1366	NA	NA
novel_circ_0002517	11.0157	10.6623	-0.017428	0.97736	0.99914
novel_circ_0002518	1.16679	0.601037	0.93081	0.69251	NA
novel_circ_0002520	0	0.326269	-0.22477	0.94246	NA
novel_circ_0002521	1.07253	2.20709	-0.99948	0.55409	0.93888
novel_circ_0002522	0	0.313183	-0.64746	0.83495	NA
novel_circ_0002523	0.624669	2.00906	-1.4313	0.49833	NA
novel_circ_0002524	0.874537	0.240415	1.7773	0.54521	NA
novel_circ_0002526	0.249868	0.331762	0.21578	0.94458	NA
novel_circ_0002527	0	0.326269	-0.22477	0.94246	NA
novel_circ_0002528	4.70298	6.13025	-0.39197	0.58701	0.94237
novel_circ_0002529	0	0.880229	-1.9039	0.50545	NA
novel_circ_0002531	0	0.730672	-1.6221	0.59653	NA
novel_circ_0002532	1.16006	0.221175	2.1056	0.44336	NA
novel_circ_0002533	3.69013	0	4.7277	0.0087647	0.14808
novel_circ_0002535	0.780099	2.09053	-1.4858	0.38902	NA
novel_circ_0002536	0.761488	1.23636	-0.57881	0.75817	NA
novel_circ_0002537	0	0.469775	-1.0715	0.72889	NA
novel_circ_0002538	0.429805	0	2.046	0.50999	NA
novel_circ_0002539	0.636555	0.360622	0.89383	0.75017	NA
novel_circ_0002540	0.499735	1.44226	-1.1573	0.61459	NA
novel_circ_0002542	0	0.927194	-1.9807	0.51618	NA
novel_circ_0002545	0	1.31211	-2.4619	0.3749	NA
novel_circ_0002546	0	0.652538	-1.4413	0.63895	NA
novel_circ_0002547	1.04013	0	2.9037	0.34536	NA
novel_circ_0002548	0	0.561156	-1.2613	0.68226	NA
novel_circ_0002549	0.822659	0.489404	0.90638	0.72544	NA
novel_circ_0002553	1.03614	1.65767	-0.49449	0.75825	NA
novel_circ_0002554	2.13492	0.721244	1.4961	0.43113	NA
novel_circ_0002556	0	0.666606	-1.4692	0.63233	NA
novel_circ_0002559	0.95976	1.28463	-0.31188	0.86666	NA
novel_circ_0002560	0.859187	1.38133	-0.7884	0.72084	NA
novel_circ_0002561	1.04013	0	2.9037	0.34536	NA
novel_circ_0002562	0.499735	0	2.1924	0.47961	NA
novel_circ_0002563	0.520066	1.20702	-1.3101	0.54533	NA
novel_circ_0002565	2.5495	1.80658	0.51424	0.72026	0.97054
novel_circ_0002567	0	0.489404	-0.95906	0.75671	NA
novel_circ_0002568	0.85961	0	2.7326	0.3756	NA
novel_circ_0002570	1.43198	0.221175	2.3473	0.36761	NA
novel_circ_0002571	1.06828	6.71668	-3.2634	0.010954	0.17161
novel_circ_0002572	5.3719	5.49609	-0.0029424	0.99704	0.99979
novel_circ_0002575	0	0.360622	-0.73621	0.81255	NA
novel_circ_0002576	0.85961	0	2.7326	0.3756	NA
novel_circ_0002577	4.53049	4.73997	-0.069816	0.93796	0.99845
novel_circ_0002578	0	0.961659	-2.0421	0.50298	NA
novel_circ_0002579	10.3677	11.4023	-0.18289	0.76267	0.97923
novel_circ_0002581	5.02583	10.5791	-1.0871	0.05037	0.40212
novel_circ_0002584	0	0.360622	-0.73621	0.81255	NA
novel_circ_0002587	1.78047	0.391479	1.946	0.4229	NA
novel_circ_0002588	0.673224	1.46506	-0.98294	0.63016	NA
novel_circ_0002589	0.499735	3.77921	-2.4973	0.082863	0.52322
novel_circ_0002592	0.859187	2.49804	-1.7556	0.29141	0.82083
novel_circ_0002595	0.894868	0	2.7467	0.37305	NA
novel_circ_0002596	0	0.704662	-1.634	0.59378	NA
novel_circ_0002598	0.780099	0.397369	0.94962	0.74558	NA
novel_circ_0002599	6.48528	8.75764	-0.40992	0.57867	0.94138
novel_circ_0002600	0.520066	0	1.8063	0.56141	NA
novel_circ_0002602	0	0.975465	-2.0664	0.49652	NA
novel_circ_0002603	0	0.397369	-0.8262	0.78991	NA
novel_circ_0002604	0	0.757991	-1.6944	0.57989	NA
novel_circ_0002605	1.21658	0.601037	1.0449	0.65282	NA
novel_circ_0002606	0.780099	1.10463	-0.4882	0.83267	NA
novel_circ_0002607	0.58003	0.644946	0.010516	0.99679	NA
novel_circ_0002608	3.50443	3.51164	-0.022194	0.98219	0.99914
novel_circ_0002611	0	0.240415	-0.22477	0.94246	NA
novel_circ_0002612	1.97807	6.92087	-1.6983	0.12729	0.63148
novel_circ_0002613	22.9998	25.559	-0.17781	0.59865	0.94484
novel_circ_0002616	6.35336	14.2102	-1.1532	0.044426	0.37473
novel_circ_0002618	0	0.264913	-0.22477	0.94246	NA
novel_circ_0002619	0.947875	0.945466	0.14237	0.94058	NA
novel_circ_0002620	0.374802	0.724291	-0.43455	0.87305	NA
novel_circ_0002621	0	0.961659	-2.0421	0.50298	NA
novel_circ_0002622	0.874537	2.77155	-1.429	0.32908	0.84618
novel_circ_0002623	0.624669	1.60532	-1.0764	0.55926	NA
novel_circ_0002624	0.679673	0.710552	0.099961	0.96515	NA
novel_circ_0002629	1.09887	0.710552	0.47994	0.82238	NA
novel_circ_0002630	15.1963	19.1959	-0.33961	0.48683	0.92114
novel_circ_0002638	19.417	25.1081	-0.40118	0.27863	0.81696
novel_circ_0002642	3.476	9.03164	-1.291	0.076726	0.50222
novel_circ_0002644	0	0.55396	-1.2538	0.68409	NA
novel_circ_0002645	2.11466	8.05299	-1.8198	0.024001	0.27278
novel_circ_0002647	3.60869	4.14279	-0.22009	0.80277	0.98881
novel_circ_0002648	14.3701	22.0718	-0.66908	0.093787	0.54867
novel_circ_0002649	5.59059	5.70175	-0.11007	0.88456	0.98993
novel_circ_0002653	2.66267	4.5513	-0.65962	0.50049	0.92496
novel_circ_0002654	2.77005	4.33556	-0.59915	0.49687	0.92383
novel_circ_0002655	2.35741	3.15299	-0.50447	0.69135	0.96513
novel_circ_0002657	1.52298	2.752	-0.72595	0.57252	0.94054
novel_circ_0002659	0.58003	0.652538	0.081525	0.9775	NA
novel_circ_0002660	1.85987	1.4749	0.32066	0.832	0.98881
novel_circ_0002661	0	0.480829	-1.0532	0.73342	NA
novel_circ_0002662	5.7903	2.98104	0.85757	0.36713	0.87057
novel_circ_0002663	0.58003	0	2.2883	0.46021	NA
novel_circ_0002664	0	0.950604	-2.0402	0.50338	NA
novel_circ_0002666	2.99835	2.56509	0.19485	0.8529	0.98881
novel_circ_0002667	5.50121	5.65286	0.02306	0.97516	0.99914
novel_circ_0002671	0	0.529825	-1.1709	0.70438	NA
novel_circ_0002672	13.6696	8.84773	0.63494	0.22105	0.77071
novel_circ_0002673	0	0.666606	-1.4692	0.63233	NA
novel_circ_0002676	12.0593	16.152	-0.39752	0.37652	0.87118
novel_circ_0002677	0.520066	1.19239	-1.3388	0.5317	NA
novel_circ_0002678	1.35935	2.4439	-0.6607	0.62001	0.94915
novel_circ_0002681	0	1.22474	-2.3792	0.39772	NA
novel_circ_0002684	1.2047	2.73305	-1.0514	0.47306	0.91488
novel_circ_0002686	0	1.19925	-2.349	0.36246	NA
novel_circ_0002688	3.36876	2.93979	0.077186	0.93541	0.99845
novel_circ_0002689	5.20994	1.29097	2.0709	0.05865	0.43038
novel_circ_0002693	3.15331	0	4.5287	0.015721	0.21142
novel_circ_0002696	0	0.529825	-1.1709	0.70438	NA
novel_circ_0002697	0	4.30856	-4.2022	0.0013385	0.041626
novel_circ_0002698	0	0.81785	-1.8114	0.55345	NA
novel_circ_0002699	0	0.907021	-1.9327	0.52661	NA
novel_circ_0002700	2.03034	0.156592	2.9024	0.18699	NA
novel_circ_0002701	0	0.264913	-0.22477	0.94246	NA
novel_circ_0002702	0.249868	0	1.6503	0.59614	NA
novel_circ_0002703	0	1.3904	-2.558	0.29608	NA
novel_circ_0002704	25.2771	72.8476	-1.524	2.1059e-06	0.00022312
novel_circ_0002705	12.4754	46.7848	-1.8468	3.1028e-08	5.1042e-06
novel_circ_0002709	5.25962	1.44449	1.7554	0.14528	0.66618
novel_circ_0002710	0.374802	1.37283	-1.3643	0.56368	NA
novel_circ_0002711	0.859187	1.23446	-0.6596	0.74943	NA
novel_circ_0002712	0	0.942304	-1.9987	0.51229	NA
novel_circ_0002714	0	0.234887	-0.41502	0.8939	NA
novel_circ_0002716	2.46288	0.873713	1.5989	0.33447	0.85216
novel_circ_0002719	0.85961	2.49747	-1.3346	0.38078	0.87166
novel_circ_0002720	0	0.360622	-0.73621	0.81255	NA
novel_circ_0002721	10.3638	11.2824	-0.16928	0.78002	0.98256
novel_circ_0002722	0	1.32464	-2.48	0.32047	NA
novel_circ_0002723	0.572792	3.09482	-2.6942	0.10341	0.57356
novel_circ_0002724	0.520066	0.240415	0.8126	0.79372	NA
novel_circ_0002725	0	0.240415	-0.22477	0.94246	NA
novel_circ_0002729	0	0.331762	-0.6655	0.83039	NA
novel_circ_0002731	0	1.84254	-2.979	0.18138	NA
novel_circ_0002734	0.624669	0	2.4011	0.43793	NA
novel_circ_0002735	0	0.360622	-0.73621	0.81255	NA
novel_circ_0002740	0.536405	0.833829	-0.37382	0.87093	NA
novel_circ_0002741	0.374802	0	1.9491	0.53048	NA
novel_circ_0002742	2.01201	1.39093	0.49769	0.74768	0.97685
novel_circ_0002744	6.95849	5.35697	0.39037	0.61841	0.94902
novel_circ_0002747	0	1.67185	-2.8465	0.26178	NA
novel_circ_0002748	0.286537	0	1.7347	0.57724	NA
novel_circ_0002749	2.1557	0	3.9919	0.057472	NA
novel_circ_0002750	0.85961	0	2.7326	0.3756	NA
novel_circ_0002752	1.82633	0.44235	2.0209	0.34997	NA
novel_circ_0002753	0	0.221175	-0.22477	0.94246	NA
novel_circ_0002754	0.780099	1.4309	-0.86931	0.66879	NA
novel_circ_0002755	0	0.156592	-0.13772	0.96473	NA
novel_circ_0002756	0	2.50093	-3.3969	0.070502	NA
novel_circ_0002757	0.769934	0.782958	-0.016148	0.99473	NA
novel_circ_0002758	10.8394	21.1783	-1.028	0.04035	0.35879
novel_circ_0002759	0	0.331762	-0.6655	0.83039	NA
novel_circ_0002760	1.59632	0.81785	1.0111	0.57177	NA
novel_circ_0002761	0.829898	2.23075	-1.2856	0.37505	0.87118
novel_circ_0002762	71.9397	68.354	0.071666	0.77777	0.98179
novel_circ_0002765	2.82197	0.499955	2.7815	0.13063	0.64041
novel_circ_0002766	0	0.234887	-0.41502	0.8939	NA
novel_circ_0002769	6.07615	6.36222	-0.096024	0.88494	0.98993
novel_circ_0002771	2.10895	1.86455	0.27437	0.86181	0.98881
novel_circ_0002775	51.9893	48.9926	0.095925	0.75277	0.97813
novel_circ_0002776	19.9055	18.3755	0.13245	0.72886	0.97181
novel_circ_0002777	0	1.45964	-2.6256	0.32465	NA
novel_circ_0002778	0.374802	0	1.9491	0.53048	NA
novel_circ_0002779	1.24934	4.04883	-1.4885	0.25746	0.8063
novel_circ_0002780	6.41296	3.88415	0.64128	0.42727	0.89619
novel_circ_0002783	15.814	11.478	0.43205	0.33626	0.85297
novel_circ_0002784	47.8449	53.9533	-0.16334	0.47908	0.91806
novel_circ_0002793	4.30001	15.1724	-1.8512	0.0068888	0.13129
novel_circ_0002798	0.286537	2.41648	-2.4101	0.16348	NA
novel_circ_0002799	1.14615	4.24577	-1.6957	0.16012	0.69911
novel_circ_0002800	1.2463	1.7413	-0.38897	0.80361	NA
novel_circ_0002802	0	0.234887	-0.41502	0.8939	NA
novel_circ_0002804	0	0.833258	-1.7985	0.55634	NA
novel_circ_0002807	0	2.04352	-3.1276	NA	NA
novel_circ_0002808	0	0.221175	-0.22477	0.94246	NA
novel_circ_0002809	6.89882	10.4661	-0.51146	0.37386	0.87118
novel_circ_0002810	0.249868	0	1.6503	0.59614	NA
novel_circ_0002811	615.836	579.09	0.090449	0.52362	0.93005
novel_circ_0002812	1.86207	2.78315	-0.53663	0.67865	0.96126
novel_circ_0002814	0	0.826224	-1.7871	0.55888	NA
novel_circ_0002815	2.16294	0.665065	1.7712	0.34539	NA
novel_circ_0002816	0.999471	0	2.9284	0.34112	NA
novel_circ_0002817	6.53827	4.31667	0.61434	0.37151	0.87057
novel_circ_0002818	20.3688	27.6189	-0.42365	0.29748	0.82588
novel_circ_0002819	7.48752	5.0715	0.44399	0.57445	0.94126
novel_circ_0002820	1.43268	0.331762	1.9991	0.43593	NA
novel_circ_0002822	0	0.313183	-0.64746	0.83495	NA
novel_circ_0002825	0	0.44235	-0.9701	0.75397	NA
novel_circ_0002826	0	0.489404	-0.95906	0.75671	NA
novel_circ_0002831	0.499735	0	2.1924	0.47961	NA
novel_circ_0002832	0	0.879833	-1.9369	0.52571	NA
novel_circ_0002833	0	1.17321	-2.3305	0.41494	NA
novel_circ_0002834	0	0.331762	-0.6655	0.83039	NA
novel_circ_0002835	0	3.05492	-3.6972	0.035659	0.33824
novel_circ_0002836	0.520066	1.14311	-1.2587	0.59618	NA
novel_circ_0002838	7.0171	7.8707	-0.10245	0.88583	0.98993
novel_circ_0002840	21.1186	12.4872	0.77291	0.094084	0.54867
novel_circ_0002841	26.1785	13.1256	0.98962	0.031034	0.31441
novel_circ_0002844	1.82241	1.63623	0.27971	0.86428	0.98881
novel_circ_0002845	0.962055	0.333303	1.6043	0.53102	NA
novel_circ_0002846	0.286537	0	1.7347	0.57724	NA
novel_circ_0002847	3.29926	0.331762	3.0854	0.089362	0.53943
novel_circ_0002848	0	0.360622	-0.73621	0.81255	NA
novel_circ_0002849	0	0.656392	-1.5137	0.62183	NA
novel_circ_0002850	21.0506	25.3247	-0.29171	0.48708	0.92114
novel_circ_0002854	0	0.326269	-0.22477	0.94246	NA
novel_circ_0002855	2.97106	4.43732	-0.46914	0.59333	0.94441
novel_circ_0002856	0.386687	0.397369	0.21117	0.9456	NA
novel_circ_0002857	1.58471	3.71581	-1.1626	0.36206	0.86933
novel_circ_0002858	0	0.331762	-0.6655	0.83039	NA
novel_circ_0002859	0	1.36973	-2.5636	0.29534	NA
novel_circ_0002860	13.821	44.7425	-1.6414	0.00073977	0.027526
novel_circ_0002865	0	0.156592	-0.13772	0.96473	NA
novel_circ_0002866	0	1.78241	-2.9332	0.15105	NA
novel_circ_0002867	0.624669	4.55124	-2.4734	0.041283	0.36398
novel_circ_0002869	0.499735	1.33167	-1.0403	0.65658	NA
novel_circ_0002871	0	0.397369	-0.8262	0.78991	NA
novel_circ_0002884	0.286537	0	1.7347	0.57724	NA
novel_circ_0002885	4.61687	4.14919	0.20092	0.82905	0.98881
novel_circ_0002886	0	0.794738	-1.7578	0.5655	NA
novel_circ_0002887	0	0.56665	-1.3084	0.67082	NA
novel_circ_0002888	26.1154	26.0829	0.0098991	0.97649	0.99914
novel_circ_0002890	0	0.499955	-0.95906	0.75671	NA
novel_circ_0002894	1.45497	3.11019	-1.3169	0.27632	0.81696
novel_circ_0002895	0.286537	0.757991	-0.72901	0.79061	NA
novel_circ_0002896	1.61	5.67905	-1.7886	0.064225	0.45312
novel_circ_0002897	0.673224	0.333303	1.4564	0.59977	NA
novel_circ_0002899	0	1.775	-2.9304	0.19137	NA
novel_circ_0002900	0.386687	1.79139	-1.9282	0.33693	NA
novel_circ_0002901	0	1.29868	-2.4776	0.32093	NA
novel_circ_0002902	1.06828	0.841451	-0.03665	0.98852	NA
novel_circ_0002904	0	0.841451	-1.8501	0.5448	NA
novel_circ_0002905	10.0724	15.569	-0.65227	0.1462	0.66707
novel_circ_0002906	6.22673	8.68334	-0.4686	0.52848	0.93005
novel_circ_0002907	2.21065	0.926831	1.1824	0.4477	0.90562
novel_circ_0002908	9.84133	14.2287	-0.56742	0.20981	0.76257
novel_circ_0002909	10.211	12.7162	-0.34994	0.53107	0.93005
novel_circ_0002910	0.624669	0.96369	-0.37517	0.86556	NA
novel_circ_0002911	3.1078	2.33966	0.38246	0.78445	0.98423
novel_circ_0002912	4.24801	2.98823	0.46666	0.6809	0.96225
novel_circ_0002914	0	0.995585	-2.0758	0.4943	NA
novel_circ_0002915	0.429805	1.23293	-1.1299	0.63577	NA
novel_circ_0002917	0	0.331762	-0.6655	0.83039	NA
novel_circ_0002919	1.82023	4.0168	-1.1549	0.66605	0.95717
novel_circ_0002920	0	0.46159	-1.0122	0.74353	NA
novel_circ_0002924	0.959479	4.18087	-2.201	0.066238	0.46108
novel_circ_0002927	0.249868	0.313183	0.23381	0.93997	NA
novel_circ_0002928	10.4383	13.7633	-0.40162	0.44557	0.90439
novel_circ_0002929	0	0.391479	-0.87237	0.77834	NA
novel_circ_0002930	0.499735	0	2.1924	0.47961	NA
novel_circ_0002931	0	0.72113	-1.6018	0.60122	NA
novel_circ_0002932	0	1.48986	-2.6693	0.26473	NA
novel_circ_0002934	0.58003	1.16187	-0.7886	0.69196	NA
novel_circ_0002935	53.4625	94.742	-0.83443	0.00036314	0.016815
novel_circ_0002936	0.286537	3.10938	-2.7686	0.090651	0.54201
novel_circ_0002937	0	3.2404	-3.7914	0.015973	0.21207
novel_circ_0002938	0	0.652538	-1.4413	0.63895	NA
novel_circ_0002939	1.05647	1.26931	-0.25903	0.88703	NA
novel_circ_0002940	19.6647	19.1003	0.066072	0.8693	0.98881
novel_circ_0002942	15.5132	19.362	-0.31488	0.83566	0.98881
novel_circ_0002944	0	0.221175	-0.22477	0.94246	NA
novel_circ_0002945	8.95068	5.36387	0.77164	0.28671	0.81961
novel_circ_0002946	0.499735	2.18812	-1.7414	0.33079	NA
novel_circ_0002947	0	1.54798	-2.7194	0.29627	NA
novel_circ_0002948	0.58003	0	2.2883	0.46021	NA
novel_circ_0002950	0.716342	0	2.5243	0.41429	NA
novel_circ_0002952	0	0.234887	-0.41502	0.8939	NA
novel_circ_0002953	4.45072	0.972175	2.1189	0.1681	0.70901
novel_circ_0002955	1.14558	0.673805	0.65831	0.77691	NA
novel_circ_0002956	5.72098	8.22765	-0.56136	0.35377	0.86646
novel_circ_0002958	0	0.234887	-0.41502	0.8939	NA
novel_circ_0002959	3.2091	1.69485	0.92924	0.50838	0.92844
novel_circ_0002963	1.0026	0.652538	0.68885	0.77439	NA
novel_circ_0002964	0.499735	1.02978	-0.67405	0.78404	NA
novel_circ_0002965	0.520066	1.14644	-1.2487	0.59876	NA
novel_circ_0002968	0.58003	0	2.2883	0.46021	NA
novel_circ_0002971	0	0.717748	-1.6258	0.59568	NA
novel_circ_0002972	0	2.14902	-3.195	0.13245	NA
novel_circ_0002973	0	0.331762	-0.6655	0.83039	NA
novel_circ_0002974	10.954	10.4207	0.077987	0.87559	0.98903
novel_circ_0002975	0.572792	0.812592	-0.7779	0.75619	NA
novel_circ_0002977	5.5671	3.40589	0.7155	0.45857	0.91123
novel_circ_0002978	0.780099	0.552937	0.50965	0.8561	NA
novel_circ_0002979	0.894868	1.16208	-0.33166	0.87222	NA
novel_circ_0002983	2.4134	0.529825	2.2383	0.22557	NA
novel_circ_0002986	0	0.326269	-0.22477	0.94246	NA
novel_circ_0002987	0.286537	0	1.7347	0.57724	NA
novel_circ_0002988	0.906753	1.21314	-0.44127	0.81433	NA
novel_circ_0002989	0	0.264913	-0.22477	0.94246	NA
novel_circ_0002990	0	0.360622	-0.73621	0.81255	NA
novel_circ_0002991	0	1.55296	-2.7243	0.24852	NA
novel_circ_0002993	0	0.331762	-0.6655	0.83039	NA
novel_circ_0002994	0.85961	0	2.7326	0.3756	NA
novel_circ_0002995	0.429805	0.240415	1.0522	0.7345	NA
novel_circ_0002996	2.14109	1.9952	0.099744	0.95011	0.99845
novel_circ_0002997	1.91467	0.331762	2.3841	0.27262	NA
novel_circ_0002999	7.49463	2.18097	1.8326	0.032268	0.31916
novel_circ_0003000	1.81351	0.156592	2.8042	0.21163	NA
novel_circ_0003001	0.859187	0	2.6378	0.39303	NA
novel_circ_0003002	0.374802	0.662281	-0.31382	0.91832	NA
novel_circ_0003003	0.374802	1.5324	-1.5294	0.46567	NA
novel_circ_0003005	1.74682	1.61304	0.11851	0.93815	0.99845
novel_circ_0003006	0.716342	0	2.5243	0.41429	NA
novel_circ_0003007	6.56268	4.975	0.41088	0.55827	0.93991
novel_circ_0003009	0	0.499955	-0.95906	0.75671	NA
novel_circ_0003010	0	1.00007	-2.0996	0.44059	NA
novel_circ_0003011	0.249868	0	1.6503	0.59614	NA
novel_circ_0003013	59.0747	61.5944	-0.070961	0.75492	0.97813
novel_circ_0003014	0	0.774112	-1.7385	0.56986	NA
novel_circ_0003015	1.21608	1.73289	-0.38502	0.81964	NA
novel_circ_0003016	0.716342	0	2.5243	0.41429	NA
novel_circ_0003017	3.37646	1.9246	0.84892	0.47606	0.91665
novel_circ_0003019	4.48356	5.93273	-0.32824	0.6713	0.95959
novel_circ_0003023	5.27891	2.77395	0.92063	0.29224	0.82083
novel_circ_0003024	11.1939	8.98071	0.28222	0.59832	0.94484
novel_circ_0003025	2.17888	1.61567	0.52244	0.72149	0.97163
novel_circ_0003026	0.536405	0.44235	0.51535	0.85516	NA
novel_circ_0003027	1.26967	1.27418	0.03379	0.98608	NA
novel_circ_0003029	0.85961	1.86033	-0.93907	0.594	NA
novel_circ_0003030	1.5867	0.234887	2.3192	0.31971	NA
novel_circ_0003033	1.02997	0	2.9099	0.32713	NA
novel_circ_0003034	0	1.73909	-2.9109	0.24444	NA
novel_circ_0003035	0.712187	0	1.8063	0.56141	NA
novel_circ_0003036	0.859187	1.13337	-0.4755	0.83527	NA
novel_circ_0003037	1.8259	0.979166	0.87592	0.61549	NA
novel_circ_0003038	1.91689	5.61128	-1.5317	0.099554	0.56369
novel_circ_0003039	10.6255	14.4464	-0.43416	0.33591	0.85294
novel_circ_0003041	0.249868	0.326269	0.65651	0.83288	NA
novel_circ_0003042	0.673224	2.94137	-1.9459	0.19705	0.74425
novel_circ_0003044	0	0.234887	-0.41502	0.8939	NA
novel_circ_0003045	0.286537	1.1909	-1.3883	0.53495	NA
novel_circ_0003046	0.773374	3.2844	-1.9965	0.16069	0.69911
novel_circ_0003047	0.95976	0.333303	1.8803	0.46019	NA
novel_circ_0003048	0.520066	0.326269	0.8126	0.79372	NA
novel_circ_0003049	0	0.234887	-0.41502	0.8939	NA
novel_circ_0003053	0.249868	0	1.6503	0.59614	NA
novel_circ_0003055	1.88285	4.71322	-1.1609	0.23005	0.78239
novel_circ_0003056	31.2817	32.8557	-0.064967	0.83582	0.98881
novel_circ_0003058	0.822941	0.707262	0.34323	0.87767	NA
novel_circ_0003059	0	0.360622	-0.73621	0.81255	NA
novel_circ_0003060	6.21693	3.07412	0.99363	0.25065	0.80128
novel_circ_0003061	0.249868	0.489404	-0.077791	0.97994	NA
novel_circ_0003063	0.499735	0	2.1924	0.47961	NA
novel_circ_0003064	3.46386	0	4.6747	0.0058195	0.11622
novel_circ_0003065	0.520066	0	1.8063	0.56141	NA
novel_circ_0003067	13.9196	0	6.6836	1.4277e-09	3.4326e-07
novel_circ_0003068	1.05447	0	3.0005	0.30437	NA
novel_circ_0003070	2.79203	1.72251	0.698	0.81234	0.98881
novel_circ_0003071	0	1.19138	-2.358	0.35612	NA
novel_circ_0003073	1.72997	0.548071	1.548	0.47528	NA
novel_circ_0003074	0	0.572177	-1.3024	0.67228	NA
novel_circ_0003075	9.80595	15.1629	-0.6037	0.19619	0.74325
novel_circ_0003076	0.773374	2.41999	-1.5487	0.35435	0.86646
novel_circ_0003078	0	0.475302	-1.062	0.73124	NA
novel_circ_0003079	0.773374	0.626366	0.32964	0.90483	NA
novel_circ_0003080	0.58003	1.12886	-0.74277	0.75433	NA
novel_circ_0003082	0.573074	2.12436	-1.6189	0.3958	NA
novel_circ_0003084	1.71478	3.93593	-1.3208	0.2437	0.7918
novel_circ_0003085	3.42292	5.07778	-0.49628	0.58681	0.94237
novel_circ_0003089	0.947875	0.44235	1.1351	0.64982	NA
novel_circ_0003090	16.1935	17.7665	-0.1106	0.78117	0.98256
novel_circ_0003092	32.981	28.6556	0.18093	0.58097	0.9417
novel_circ_0003093	0	0.234887	-0.41502	0.8939	NA
novel_circ_0003094	14.9619	15.9417	-0.10775	0.79919	0.98801
novel_circ_0003096	0	0.234887	-0.41502	0.8939	NA
novel_circ_0003097	0.374802	0	1.9491	0.53048	NA
novel_circ_0003098	0.769934	0.752101	0.056111	0.97994	NA
novel_circ_0003099	0	0.863128	-1.867	0.54107	NA
novel_circ_0003100	1.09887	0	2.9443	0.31248	NA
novel_circ_0003101	1.32268	1.009	0.45288	0.81672	NA
novel_circ_0003103	1.06828	0	2.6378	0.39303	NA
novel_circ_0003104	0	2.19228	-3.2473	NA	NA
novel_circ_0003105	0.906753	0.612654	0.50696	0.82105	NA
novel_circ_0003106	0.58003	1.98155	-1.5975	0.32557	NA
novel_circ_0003107	0.386687	1.4309	-1.5829	0.4541	NA
novel_circ_0003111	4.33766	5.52324	-0.2928	0.72754	0.97181
novel_circ_0003114	0	0.221175	-0.22477	0.94246	NA
novel_circ_0003116	0.374802	0.782958	-0.60327	0.83757	NA
novel_circ_0003117	147.334	252.46	-0.7706	1.1796e-05	0.00094531
novel_circ_0003118	5.97822	12.3593	-1.0686	0.094617	0.55019
novel_circ_0003119	0.374802	0	1.9491	0.53048	NA
novel_circ_0003120	0	0.313183	-0.64746	0.83495	NA
novel_circ_0003121	1.14558	0	3.0223	0.32522	NA
novel_circ_0003122	0	0.529825	-1.1709	0.70438	NA
novel_circ_0003123	8.33242	7.14214	0.21984	0.71114	0.96754
novel_circ_0003124	1.14474	4.95532	-2.0177	0.094093	0.54867
novel_circ_0003125	0	0.499955	-0.95906	0.75671	NA
novel_circ_0003126	2.92699	2.24847	0.35483	0.79675	0.98759
novel_circ_0003127	2.31238	0.221175	3.1197	0.073463	NA
novel_circ_0003128	0.624669	0	2.4011	0.43793	NA
novel_circ_0003129	3.12148	4.23623	-0.46149	0.66629	0.95717
novel_circ_0003130	5.10071	3.30241	0.60346	0.51534	0.93005
novel_circ_0003131	5.42882	1.61691	1.7393	0.15351	0.68348
novel_circ_0003133	0	0.908693	-1.9794	0.51647	NA
novel_circ_0003134	0.429805	0	2.046	0.50999	NA
novel_circ_0003135	2.09112	1.28082	0.76662	0.67196	0.9601
novel_circ_0003138	9.74968	5.78028	0.73269	0.28553	0.81961
novel_circ_0003139	0.374802	1.16725	-1.1281	0.61362	NA
novel_circ_0003140	0.286537	0.978807	-1.0685	0.70857	NA
novel_circ_0003141	0	0.234887	-0.41502	0.8939	NA
novel_circ_0003147	21.4971	13.5453	0.67899	0.097209	0.55741
novel_circ_0003148	0	0.391479	-0.87237	0.77834	NA
novel_circ_0003149	0	1.4263	-2.6072	0.23477	NA
novel_circ_0003150	0.286537	1.23496	-1.4494	0.51325	NA
novel_circ_0003151	0	0.626366	-1.4691	0.63234	NA
novel_circ_0003152	0	1.05056	-2.1536	0.46869	NA
novel_circ_0003153	0	0.156592	-0.13772	0.96473	NA
novel_circ_0003154	0.374802	2.75708	-2.3498	0.16166	0.70028
novel_circ_0003155	0	0.469775	-1.0715	0.72889	NA
novel_circ_0003156	0	1.21853	-2.3695	0.35385	NA
novel_circ_0003157	0	0.313183	-0.64746	0.83495	NA
novel_circ_0003158	0.520066	0.740369	-0.5982	0.81754	NA
novel_circ_0003161	1.46794	2.09288	-0.42982	0.75166	0.97786
novel_circ_0003162	0	1.01785	-2.1514	0.47993	NA
novel_circ_0003163	7.6951	6.71221	0.20048	0.76119	0.97874
novel_circ_0003164	0	0.391479	-0.87237	0.77834	NA
novel_circ_0003165	1.29789	1.08386	0.32216	0.8433	NA
novel_circ_0003166	0	0.221175	-0.22477	0.94246	NA
novel_circ_0003168	0.886422	0.326269	1.7874	0.49127	NA
novel_circ_0003169	16.8776	17.4044	-0.081289	0.85764	0.98881
novel_circ_0003170	0	1.28443	-2.4538	0.32702	NA
novel_circ_0003173	5.60791	6.99651	-0.3681	0.5994	0.94484
novel_circ_0003174	2.01616	2.63675	-0.38006	0.79388	0.9865
novel_circ_0003175	0.624669	6.74764	-3.0714	0.014693	0.20426
novel_circ_0003177	21.5465	22.1282	-0.066474	0.85881	0.98881
[truncated: 14,536 more rows]

## Sheet: DE analysis of miRNA
miRNA	AN_readcount	SE_readcount	log2FoldChange	pval	padj
novel_miR_107	195.785	1.81669	7.0563	1.3834e-48	2.1996e-46
novel_miR_56	1094.78	238.11	2.1982	1.6496e-20	1.3115e-18
novel_miR_142	50.7228	0	8.1697	2.3678e-15	1.255e-13
novel_miR_130	80.0616	5.63731	3.8235	2.0869e-13	8.2955e-12
novel_miR_73	418.844	78.0484	2.4116	1.5977e-10	5.0808e-09
oar-miR-10b	13007.1	53784.2	-2.0478	2.8394e-10	7.5244e-09
oar-miR-200b	13081.9	30495.9	-1.221	1.4566e-09	3.3086e-08
oar-miR-29a	1145.22	644.759	0.83036	1.5043e-08	2.9897e-07
novel_miR_16	6038.39	2479.34	1.286	3.9451e-08	6.9697e-07
oar-miR-17-5p	1368.79	598.866	1.1959	1.3045e-07	2.0742e-06
oar-miR-410-3p	53.6101	110.845	-1.0338	1.5972e-06	2.3087e-05
oar-miR-432	92.5934	164.938	-0.82313	4.7108e-06	6.2419e-05
oar-miR-194	63574.3	30043.3	1.0815	8.5113e-06	9.8089e-05
oar-miR-200a	22871.9	43681.5	-0.93329	8.6368e-06	9.8089e-05
oar-miR-493-3p	930.352	1481.75	-0.66969	1.4762e-05	0.00015648
oar-miR-106b	1115.49	618.508	0.84933	5.7427e-05	0.00057068
novel_miR_4	28123.6	64325.1	-1.1936	0.00010394	0.00097214
oar-miR-29b	85.1014	41.9373	0.99997	0.00011839	0.0010457
novel_miR_105	141.061	31.821	2.1795	0.00023319	0.0019514
novel_miR_89	261.726	73.0898	1.8432	0.00031032	0.002467
novel_miR_21	1967.93	1183.39	0.73127	0.00045924	0.0034771
oar-miR-19b	3045.78	1474.26	1.0498	0.00048447	0.0035014
oar-miR-22-3p	12192.5	8892.43	0.45551	0.00056654	0.0039165
oar-miR-106a	111.971	28.2304	2.0198	0.00067083	0.0044443
oar-miR-323a-3p	39.7898	76.4318	-0.95694	0.0007453	0.0047401
oar-miR-25	4298.39	2600.61	0.72455	0.0010215	0.006247
oar-miR-380-3p	102.26	201.797	-0.98517	0.0011135	0.0065574
novel_miR_68	227.352	434.043	-0.9309	0.0011627	0.0066022
novel_miR_30	247.673	142.536	0.82134	0.0013724	0.0070392
oar-let-7g	39765.3	27225.3	0.54663	0.0013688	0.0070392
oar-miR-191	14247.1	9230.59	0.62643	0.0012969	0.0070392
novel_miR_2	771434	339776	1.183	0.0018637	0.0092601
novel_miR_143	5.07715	14.9745	-1.7234	0.0020153	0.0094132
novel_miR_384	1542.7	2613.85	-0.7597	0.001968	0.0094132
oar-miR-379-3p	44.9217	76.4993	-0.7946	0.0020721	0.0094132
novel_miR_422	14.5591	5.67199	1.4568	0.0021643	0.009559
oar-let-7f	54321.3	38325.8	0.50322	0.0033757	0.014507
oar-miR-221	708.665	969.655	-0.44974	0.0043995	0.018408
oar-miR-181a	8186.63	6015.57	0.44377	0.0053152	0.02167
oar-miR-133	492.207	883.948	-0.84343	0.0055459	0.022045
novel_miR_74	217.649	424.892	-0.95822	0.0067308	0.024398
novel_miR_91	126.074	81.2419	0.62215	0.0065029	0.024398
oar-miR-125b	2808.42	3909.76	-0.47731	0.0067517	0.024398
oar-miR-758-3p	30.8759	54.0123	-0.76744	0.0064137	0.024398
novel_miR_119	39.9001	19.6468	1.0463	0.0069548	0.024574
novel_miR_395	42.8962	25.0969	0.8124	0.007773	0.026868
novel_miR_129	24.927	10.4975	1.2422	0.011472	0.038809
novel_miR_92	201.742	128.189	0.66618	0.012595	0.041722
novel_miR_340	4.8516	12.4699	-1.4416	0.01293	0.041957
oar-miR-493-5p	144.89	212.998	-0.56763	0.013573	0.043163
oar-miR-374a	552.527	398.438	0.47861	0.014584	0.045467
oar-miR-382-5p	198.789	264.446	-0.4064	0.015263	0.04667
oar-miR-370-3p	286.538	492.329	-0.7782	0.015658	0.046975
