# Supplementary material for: Non-Coding Transcriptome Provides Novel Insights into the Escherichia coli F17 Susceptibility of Sheep Lamb
Source: Biology (Basel). 2022 Feb 22;11(3):348. doi: 10.3390/biology11030348 (PMC8945857; doi:10.3390/biology11030348)
Supplement: Supplementary file 1 [file biology-11-00348-s001.zip › Supplementary Table S4.xlsx]

## Sheet: circRNA_GO
Table S4: GO and KEGG enrichment results of source genes of DE circRNAs and target genes of DE miRNAs
GO_accession	Description	Term_type	Over_represented_pValue	Corrected_pValue	DEG_item	DEG_list	Bg_item	Bg_list	Gene_names
GO:0045861	negative regulation of proteolysis	biological_process	0.0059078	1	2	50	20	8082	1.01103e+17
GO:0030599	pectinesterase activity	molecular_function	0.010562	1	1	50	2	8082	101121712
GO:0042545	cell wall modification	biological_process	0.010562	1	1	50	2	8082	101121712
GO:0032269	negative regulation of cellular protein metabolic process	biological_process	0.010772	1	2	50	25	8082	1.0112e+17
GO:0051248	negative regulation of protein metabolic process	biological_process	0.010772	1	2	50	25	8082	1.0112e+17
GO:0044699	single-organism process	biological_process	0.011389	1	32	50	3731	8082	101108738,101120290,101109529,101103204,101112674,101102774,101120915,101118936,443347,101101882,101106744,101103249,101101931,101108734,101108300,101117907,101121712,101103105,101111372,101116572,443082,101107275,101118923,101120872,101103519,101120850,101107584,101117211,101108218,101119740,101111770,101104742
GO:0006778	porphyrin-containing compound metabolic process	biological_process	0.011592	1	2	50	23	8082	101107584443082
GO:0071555	cell wall organization	biological_process	0.012623	1	1	50	3	8082	101121712
GO:0015109	chromate transmembrane transporter activity	molecular_function	0.014149	1	1	50	1	8082	101103519
GO:0015703	chromate transport	biological_process	0.014149	1	1	50	1	8082	101103519
GO:0006274	DNA replication termination	biological_process	0.014166	1	1	50	1	8082	101116572
GO:0043086	negative regulation of catalytic activity	biological_process	0.014586	1	2	50	29	8082	1.01103e+17
GO:0044092	negative regulation of molecular function	biological_process	0.014586	1	2	50	29	8082	1.0112e+17
GO:0030162	regulation of proteolysis	biological_process	0.014613	1	2	50	30	8082	1.01103e+17
GO:0033743	peptide-methionine (R)-S-oxide reductase activity	molecular_function	0.015021	1	1	50	2	8082	101108734
GO:0008521	acetyl-CoA transporter activity	molecular_function	0.015574	1	1	50	2	8082	101112105
GO:0051185	coenzyme transporter activity	molecular_function	0.015574	1	1	50	2	8082	101112105
GO:0005245	voltage-gated calcium channel activity	molecular_function	0.018609	1	1	50	2	8082	101117907
GO:0044270	cellular nitrogen compound catabolic process	biological_process	0.020649	1	2	50	33	8082	443082101110460
GO:0046700	heterocycle catabolic process	biological_process	0.020649	1	2	50	33	8082	443082101110460
GO:0016853	isomerase activity	molecular_function	0.020953	1	3	50	87	8082	1.01119e+26
GO:1901361	organic cyclic compound catabolic process	biological_process	0.021816	1	2	50	34	8082	101110460443082
GO:0051186	cofactor metabolic process	biological_process	0.023459	1	3	50	79	8082	4.43082e+23
GO:0042440	pigment metabolic process	biological_process	0.025478	1	2	50	31	8082	101107584443082
GO:0045229	external encapsulating structure organization	biological_process	0.026786	1	1	50	4	8082	101121712
GO:0030493	bacteriochlorophyll metabolic process	biological_process	0.028673	1	1	50	3	8082	101107584
GO:0030494	bacteriochlorophyll biosynthetic process	biological_process	0.028673	1	1	50	3	8082	101107584
GO:0044765	single-organism transport	biological_process	0.029076	1	12	50	912	8082	1.01103e+104
GO:0019439	aromatic compound catabolic process	biological_process	0.029317	1	2	50	38	8082	443082101110460
GO:1901575	organic substance catabolic process	biological_process	0.029375	1	4	50	168	8082	4.43082e+32
GO:0010466	negative regulation of peptidase activity	biological_process	0.029595	1	1	50	6	8082	101103249
GO:0010951	negative regulation of endopeptidase activity	biological_process	0.029595	1	1	50	6	8082	101103249
GO:0016855	racemase and epimerase activity, acting on amino acids and derivatives	molecular_function	0.030448	1	1	50	4	8082	101118923
GO:0036361	racemase activity, acting on amino acids and derivatives	molecular_function	0.030448	1	1	50	4	8082	101118923
GO:0000184	nuclear-transcribed mRNA catabolic process, nonsense-mediated decay	biological_process	0.030688	1	1	50	5	8082	101110460
GO:0004392	heme oxygenase (decyclizing) activity	molecular_function	0.031126	1	1	50	5	8082	443082
GO:0006788	heme oxidation	biological_process	0.031126	1	1	50	5	8082	443082
GO:0071554	cell wall organization or biogenesis	biological_process	0.032103	1	1	50	6	8082	101121712
GO:0071804	cellular potassium ion transport	biological_process	0.033409	1	1	50	3	8082	101120872
GO:0071805	potassium ion transmembrane transport	biological_process	0.033409	1	1	50	3	8082	101120872
GO:1902578	single-organism localization	biological_process	0.033649	1	12	50	931	8082	1.01118e+104
GO:0008716	D-alanine-D-alanine ligase activity	molecular_function	0.034143	1	1	50	3	8082	101107584
GO:0033013	tetrapyrrole metabolic process	biological_process	0.034775	1	2	50	41	8082	101107584443082
GO:0031324	negative regulation of cellular metabolic process	biological_process	0.036555	1	2	50	40	8082	1.01103e+17
GO:0006743	ubiquinone metabolic process	biological_process	0.036811	1	1	50	6	8082	101120850
GO:0006744	ubiquinone biosynthetic process	biological_process	0.036811	1	1	50	6	8082	101120850
GO:0042470	melanosome	cellular_component	0.037457	1	1	50	4	8082	101117907
GO:0048770	pigment granule	cellular_component	0.037457	1	1	50	4	8082	101117907
GO:0015995	chlorophyll biosynthetic process	biological_process	0.03753	1	1	50	5	8082	101107584
GO:0016192	vesicle-mediated transport	biological_process	0.04051	1	4	50	161	8082	1.01112e+35
GO:0032268	regulation of cellular protein metabolic process	biological_process	0.040834	1	2	50	53	8082	1.0112e+17
GO:0010605	negative regulation of macromolecule metabolic process	biological_process	0.041664	1	2	50	44	8082	1.0112e+17
GO:0051246	regulation of protein metabolic process	biological_process	0.041664	1	2	50	55	8082	1.0112e+17
GO:0005891	voltage-gated calcium channel complex	cellular_component	0.044275	1	1	50	6	8082	101117907
GO:0034704	calcium channel complex	cellular_component	0.044275	1	1	50	6	8082	101117907
GO:0005975	carbohydrate metabolic process	biological_process	0.044417	1	5	50	249	8082	1.01109e+44
GO:0031704	apelin receptor binding	molecular_function	0.045379	1	1	50	7	8082	101101931
GO:0071855	neuropeptide receptor binding	molecular_function	0.046201	1	1	50	8	8082	101101931
GO:0042181	ketone biosynthetic process	biological_process	0.048599	1	1	50	7	8082	101120850
GO:1901661	quinone metabolic process	biological_process	0.048599	1	1	50	7	8082	101120850
GO:1901663	quinone biosynthetic process	biological_process	0.048599	1	1	50	7	8082	101120850
GO:0016671	oxidoreductase activity, acting on a sulfur group of donors, disulfide as acceptor	molecular_function	0.050044	1	1	50	5	8082	101108734
GO:0051276	chromosome organization	biological_process	0.050311	1	3	50	127	8082	1.0112e+26
GO:0003854	3-beta-hydroxy-delta5-steroid dehydrogenase activity	molecular_function	0.050436	1	1	50	9	8082	101106744
GO:0016229	steroid dehydrogenase activity	molecular_function	0.050436	1	1	50	9	8082	101106744
GO:0033764	steroid dehydrogenase activity, acting on the CH-OH group of donors, NAD or NADP as acceptor	molecular_function	0.050436	1	1	50	9	8082	101106744
GO:0051184	cofactor transporter activity	molecular_function	0.050622	1	1	50	6	8082	101112105
GO:0000975	regulatory region DNA binding	molecular_function	0.050813	1	1	50	8	8082	443082
GO:0001067	regulatory region nucleic acid binding	molecular_function	0.050813	1	1	50	8	8082	443082
GO:0006013	mannose metabolic process	biological_process	0.051522	1	1	50	6	8082	101116572
GO:0009892	negative regulation of metabolic process	biological_process	0.051809	1	2	50	52	8082	1.0112e+17
GO:0006694	steroid biosynthetic process	biological_process	0.052559	1	1	50	10	8082	101106744
GO:0005618	cell wall	cellular_component	0.053971	1	1	50	7	8082	101121712
GO:0016846	carbon-sulfur lyase activity	molecular_function	0.054688	1	1	50	11	8082	101108734
GO:0015994	chlorophyll metabolic process	biological_process	0.055301	1	1	50	8	8082	101107584
GO:0015016	[heparan sulfate]-glucosamine N-sulfotransferase activity	molecular_function	0.055423	1	1	50	4	8082	101112819
GO:0034483	heparan sulfate sulfotransferase activity	molecular_function	0.055423	1	1	50	4	8082	101112819
GO:0042180	cellular ketone metabolic process	biological_process	0.057312	1	1	50	9	8082	101120850
GO:0016854	racemase and epimerase activity	molecular_function	0.057527	1	1	50	9	8082	101118923
GO:0008509	anion transmembrane transporter activity	molecular_function	0.059368	1	2	50	63	8082	1.01104e+17
GO:0006541	glutamine metabolic process	biological_process	0.060668	1	1	50	7	8082	101107584
GO:0001664	G-protein coupled receptor binding	molecular_function	0.062159	1	1	50	20	8082	101101931
GO:0070838	divalent metal ion transport	biological_process	0.062195	1	2	50	57	8082	1.01103e+17
GO:0006787	porphyrin-containing compound catabolic process	biological_process	0.062436	1	1	50	9	8082	443082
GO:0033015	tetrapyrrole catabolic process	biological_process	0.062436	1	1	50	9	8082	443082
GO:0051179	localization	biological_process	0.063944	1	14	50	1231	8082	1.01109e+122
GO:0030145	manganese ion binding	molecular_function	0.064876	1	1	50	6	8082	101109436
GO:0017053	transcriptional repressor complex	cellular_component	0.065839	1	1	50	7	8082	101103519
GO:0000956	nuclear-transcribed mRNA catabolic process	biological_process	0.06767	1	1	50	8	8082	101110460
GO:0009877	nodulation	biological_process	0.067819	1	1	50	8	8082	101111372
GO:0008202	steroid metabolic process	biological_process	0.067878	1	1	50	13	8082	101106744
GO:0051188	cofactor biosynthetic process	biological_process	0.069578	1	2	50	51	8082	1.01121e+17
GO:0005215	transporter activity	molecular_function	0.070376	1	9	50	698	8082	4.43347e+77
GO:0016861	intramolecular oxidoreductase activity, interconverting aldoses and ketoses	molecular_function	0.071547	1	1	50	12	8082	101108738
GO:0044723	single-organism carbohydrate metabolic process	biological_process	0.072244	1	3	50	132	8082	1.01111e+26
GO:0055085	transmembrane transport	biological_process	0.074868	1	6	50	411	8082	1.01121e+50
GO:0070588	calcium ion transmembrane transport	biological_process	0.075407	1	1	50	8	8082	101117907
GO:0051187	cofactor catabolic process	biological_process	0.075655	1	1	50	10	8082	443082
GO:0006811	ion transport	biological_process	0.075858	1	7	50	505	8082	1.01103e+62
GO:0016667	oxidoreductase activity, acting on a sulfur group of donors	molecular_function	0.076288	1	2	50	62	8082	1.01113e+17
GO:0044712	single-organism catabolic process	biological_process	0.078019	1	2	50	73	8082	1.01117e+17
GO:0030001	metal ion transport	biological_process	0.078423	1	4	50	207	8082	1.01112e+35
GO:0051346	negative regulation of hydrolase activity	biological_process	0.079112	1	1	50	12	8082	101103249
GO:0004177	aminopeptidase activity	molecular_function	0.080637	1	1	50	13	8082	101109436
GO:0051087	chaperone binding	molecular_function	0.080741	1	1	50	18	8082	101117995
GO:0006810	transport	biological_process	0.082387	1	13	50	1166	8082	1.0111e+113
GO:0007094	mitotic spindle assembly checkpoint	biological_process	0.083198	1	1	50	14	8082	101120290
GO:0009895	negative regulation of catabolic process	biological_process	0.083198	1	1	50	14	8082	101120290
GO:0031330	negative regulation of cellular catabolic process	biological_process	0.083198	1	1	50	14	8082	101120290
GO:0031396	regulation of protein ubiquitination	biological_process	0.083198	1	1	50	14	8082	101120290
GO:0031397	negative regulation of protein ubiquitination	biological_process	0.083198	1	1	50	14	8082	101120290
GO:0031577	spindle checkpoint	biological_process	0.083198	1	1	50	14	8082	101120290
GO:0032435	negative regulation of proteasomal ubiquitin-dependent protein catabolic process	biological_process	0.083198	1	1	50	14	8082	101120290
GO:0033046	negative regulation of sister chromatid segregation	biological_process	0.083198	1	1	50	14	8082	101120290
GO:0033048	negative regulation of mitotic sister chromatid segregation	biological_process	0.083198	1	1	50	14	8082	101120290
GO:0042177	negative regulation of protein catabolic process	biological_process	0.083198	1	1	50	14	8082	101120290
GO:0045839	negative regulation of mitotic nuclear division	biological_process	0.083198	1	1	50	14	8082	101120290
GO:0045841	negative regulation of mitotic metaphase/anaphase transition	biological_process	0.083198	1	1	50	14	8082	101120290
GO:0051340	regulation of ligase activity	biological_process	0.083198	1	1	50	14	8082	101120290
GO:0051352	negative regulation of ligase activity	biological_process	0.083198	1	1	50	14	8082	101120290
GO:0051436	negative regulation of ubiquitin-protein ligase activity involved in mitotic cell cycle	biological_process	0.083198	1	1	50	14	8082	101120290
GO:0051438	regulation of ubiquitin-protein transferase activity	biological_process	0.083198	1	1	50	14	8082	101120290
GO:0051439	regulation of ubiquitin-protein ligase activity involved in mitotic cell cycle	biological_process	0.083198	1	1	50	14	8082	101120290
GO:0051444	negative regulation of ubiquitin-protein transferase activity	biological_process	0.083198	1	1	50	14	8082	101120290
GO:0051985	negative regulation of chromosome segregation	biological_process	0.083198	1	1	50	14	8082	101120290
GO:0071173	spindle assembly checkpoint	biological_process	0.083198	1	1	50	14	8082	101120290
GO:0071174	mitotic spindle checkpoint	biological_process	0.083198	1	1	50	14	8082	101120290
GO:1901799	negative regulation of proteasomal protein catabolic process	biological_process	0.083198	1	1	50	14	8082	101120290
GO:1901988	negative regulation of cell cycle phase transition	biological_process	0.083198	1	1	50	14	8082	101120290
GO:1901991	negative regulation of mitotic cell cycle phase transition	biological_process	0.083198	1	1	50	14	8082	101120290
GO:1902100	negative regulation of metaphase/anaphase transition of cell cycle	biological_process	0.083198	1	1	50	14	8082	101120290
GO:1903051	negative regulation of proteolysis involved in cellular protein catabolic process	biological_process	0.083198	1	1	50	14	8082	101120290
GO:1903320	regulation of protein modification by small protein conjugation or removal	biological_process	0.083198	1	1	50	14	8082	101120290
GO:1903321	negative regulation of protein modification by small protein conjugation or removal	biological_process	0.083198	1	1	50	14	8082	101120290
GO:1903363	negative regulation of cellular protein catabolic process	biological_process	0.083198	1	1	50	14	8082	101120290
GO:1904666	regulation of ubiquitin protein ligase activity	biological_process	0.083198	1	1	50	14	8082	101120290
GO:1904667	negative regulation of ubiquitin protein ligase activity	biological_process	0.083198	1	1	50	14	8082	101120290
GO:2000816	negative regulation of mitotic sister chromatid separation	biological_process	0.083198	1	1	50	14	8082	101120290
GO:2001251	negative regulation of chromosome organization	biological_process	0.083198	1	1	50	14	8082	101120290
GO:0022857	transmembrane transporter activity	molecular_function	0.083276	1	8	50	618	8082	1.0112e+68
GO:0007093	mitotic cell cycle checkpoint	biological_process	0.08399	1	1	50	15	8082	101120290
GO:0045930	negative regulation of mitotic cell cycle	biological_process	0.08399	1	1	50	15	8082	101120290
GO:0072511	divalent inorganic cation transport	biological_process	0.084101	1	2	50	64	8082	1.01103e+17
GO:0051234	establishment of localization	biological_process	0.084207	1	13	50	1171	8082	1.01112e+113
GO:0007091	metaphase/anaphase transition of mitotic cell cycle	biological_process	0.084944	1	1	50	16	8082	101120290
GO:0010965	regulation of mitotic sister chromatid separation	biological_process	0.084944	1	1	50	16	8082	101120290
GO:0030071	regulation of mitotic metaphase/anaphase transition	biological_process	0.084944	1	1	50	16	8082	101120290
GO:0031145	anaphase-promoting complex-dependent proteasomal ubiquitin-dependent protein catabolic process	biological_process	0.084944	1	1	50	16	8082	101120290
GO:0032434	regulation of proteasomal ubiquitin-dependent protein catabolic process	biological_process	0.084944	1	1	50	16	8082	101120290
GO:0033044	regulation of chromosome organization	biological_process	0.084944	1	1	50	16	8082	101120290
GO:0033045	regulation of sister chromatid segregation	biological_process	0.084944	1	1	50	16	8082	101120290
GO:0033047	regulation of mitotic sister chromatid segregation	biological_process	0.084944	1	1	50	16	8082	101120290
GO:0044784	metaphase/anaphase transition of cell cycle	biological_process	0.084944	1	1	50	16	8082	101120290
GO:0051306	mitotic sister chromatid separation	biological_process	0.084944	1	1	50	16	8082	101120290
GO:0051983	regulation of chromosome segregation	biological_process	0.084944	1	1	50	16	8082	101120290
GO:0061136	regulation of proteasomal protein catabolic process	biological_process	0.084944	1	1	50	16	8082	101120290
GO:1902099	regulation of metaphase/anaphase transition of cell cycle	biological_process	0.084944	1	1	50	16	8082	101120290
GO:1903050	regulation of proteolysis involved in cellular protein catabolic process	biological_process	0.084944	1	1	50	16	8082	101120290
GO:1903362	regulation of cellular protein catabolic process	biological_process	0.084944	1	1	50	16	8082	101120290
GO:0006820	anion transport	biological_process	0.085901	1	2	50	81	8082	1.01104e+17
GO:0016860	intramolecular oxidoreductase activity	molecular_function	0.086249	1	1	50	15	8082	101108738
GO:0042176	regulation of protein catabolic process	biological_process	0.08816	1	1	50	18	8082	101120290
GO:0006779	porphyrin-containing compound biosynthetic process	biological_process	0.088686	1	1	50	12	8082	101107584
GO:0016702	oxidoreductase activity, acting on single donors with incorporation of molecular oxygen, incorporation of two atoms of oxygen	molecular_function	0.089218	1	1	50	14	8082	101102774
GO:0006402	mRNA catabolic process	biological_process	0.089747	1	1	50	13	8082	101110460
GO:0007339	binding of sperm to zona pellucida	biological_process	0.089823	1	1	50	9	8082	101101882
GO:0008037	cell recognition	biological_process	0.089823	1	1	50	9	8082	101101882
GO:0009988	cell-cell recognition	biological_process	0.089823	1	1	50	9	8082	101101882
GO:0035036	sperm-egg recognition	biological_process	0.089823	1	1	50	9	8082	101101882
GO:0006812	cation transport	biological_process	0.09237	1	5	50	330	8082	1.01109e+44
GO:0052547	regulation of peptidase activity	biological_process	0.09297	1	1	50	14	8082	101103249
GO:0052548	regulation of endopeptidase activity	biological_process	0.09297	1	1	50	14	8082	101103249
GO:0000278	mitotic cell cycle	biological_process	0.09401	1	2	50	90	8082	1.01119e+17
GO:1903047	mitotic cell cycle process	biological_process	0.09401	1	2	50	90	8082	1.0112e+17
GO:0016021	integral component of membrane	cellular_component	0.095434	1	13	50	1640	8082	1.0112e+113
GO:0042168	heme metabolic process	biological_process	0.095574	1	1	50	13	8082	443082
GO:0006401	RNA catabolic process	biological_process	0.095816	1	1	50	14	8082	101110460
GO:0051784	negative regulation of nuclear division	biological_process	0.096021	1	1	50	17	8082	101120290
GO:0051348	negative regulation of transferase activity	biological_process	0.096152	1	1	50	15	8082	101120290
GO:0015298	solute:cation antiporter activity	molecular_function	0.096285	1	1	50	9	8082	101108738
GO:0015299	solute:proton antiporter activity	molecular_function	0.096285	1	1	50	9	8082	101108738
GO:0031224	intrinsic component of membrane	cellular_component	0.096797	1	13	50	1646	8082	1.01112e+113
GO:0051304	chromosome separation	biological_process	0.097088	1	1	50	17	8082	101120290
GO:0050790	regulation of catalytic activity	biological_process	0.0971	1	2	50	68	8082	1.0112e+17
GO:0072509	divalent inorganic cation transmembrane transporter activity	molecular_function	0.098433	1	2	50	76	8082	1.01103e+17
GO:0044265	cellular macromolecule catabolic process	biological_process	0.10059	1	2	50	76	8082	1.0111e+17
GO:0051301	cell division	biological_process	0.10171	1	2	50	78	8082	1.0112e+17
GO:0044763	single-organism cellular process	biological_process	0.10186	1	23	50	2987	8082	1.01108e+200
GO:0006338	chromatin remodeling	biological_process	0.1019	1	1	50	12	8082	101121782
GO:0007088	regulation of mitotic nuclear division	biological_process	0.10196	1	1	50	18	8082	101120290
GO:0044770	cell cycle phase transition	biological_process	0.10196	1	1	50	18	8082	101120290
GO:0044772	mitotic cell cycle phase transition	biological_process	0.10196	1	1	50	18	8082	101120290
GO:1901987	regulation of cell cycle phase transition	biological_process	0.10196	1	1	50	18	8082	101120290
GO:1901990	regulation of mitotic cell cycle phase transition	biological_process	0.10196	1	1	50	18	8082	101120290
GO:0000070	mitotic sister chromatid segregation	biological_process	0.10198	1	1	50	18	8082	101120290
GO:0000819	sister chromatid segregation	biological_process	0.10198	1	1	50	18	8082	101120290
GO:0016881	acid-amino acid ligase activity	molecular_function	0.10502	1	1	50	14	8082	101107584
GO:0006904	vesicle docking involved in exocytosis	biological_process	0.10728	1	1	50	13	8082	101121712
GO:0010948	negative regulation of cell cycle process	biological_process	0.10769	1	1	50	18	8082	101120290
GO:0008373	sialyltransferase activity	molecular_function	0.10816	1	1	50	11	8082	101108300
GO:0048278	vesicle docking	biological_process	0.10866	1	1	50	14	8082	101121712
GO:0031400	negative regulation of protein modification process	biological_process	0.10896	1	1	50	16	8082	101120290
GO:0051782	negative regulation of cell division	biological_process	0.10993	1	1	50	19	8082	101120290
GO:0065009	regulation of molecular function	biological_process	0.113	1	2	50	75	8082	1.0112e+17
GO:0051783	regulation of nuclear division	biological_process	0.11453	1	1	50	21	8082	101120290
GO:0009064	glutamine family amino acid metabolic process	biological_process	0.11523	1	1	50	14	8082	101107584
GO:0007346	regulation of mitotic cell cycle	biological_process	0.11549	1	1	50	20	8082	101120290
GO:0044459	plasma membrane part	cellular_component	0.11801	1	2	50	84	8082	1.01112e+17
GO:0004129	cytochrome-c oxidase activity	molecular_function	0.11801	1	1	50	24	8082	101117907
GO:0016675	oxidoreductase activity, acting on a heme group of donors	molecular_function	0.11801	1	1	50	24	8082	101117907
GO:0016676	oxidoreductase activity, acting on a heme group of donors, oxygen as acceptor	molecular_function	0.11801	1	1	50	24	8082	101117907
GO:0022406	membrane docking	biological_process	0.11823	1	1	50	15	8082	101121712
GO:0009312	oligosaccharide biosynthetic process	biological_process	0.12066	1	1	50	15	8082	101111372
GO:0007009	plasma membrane organization	biological_process	0.12117	1	1	50	16	8082	101120915
GO:0004559	alpha-mannosidase activity	molecular_function	0.12134	1	1	50	13	8082	101116572
GO:0048523	negative regulation of cellular process	biological_process	0.12194	1	2	50	85	8082	1.0112e+17
GO:0000075	cell cycle checkpoint	biological_process	0.1225	1	1	50	23	8082	101120290
GO:0009311	oligosaccharide metabolic process	biological_process	0.1226	1	1	50	16	8082	101111372
GO:0015923	mannosidase activity	molecular_function	0.12302	1	1	50	14	8082	101116572
GO:0007338	single fertilization	biological_process	0.1233	1	1	50	15	8082	101101882
GO:0009566	fertilization	biological_process	0.1233	1	1	50	15	8082	101101882
GO:0009056	catabolic process	biological_process	0.12368	1	4	50	271	8082	1.0112e+32
GO:0017080	sodium channel regulator activity	molecular_function	0.12467	1	1	50	20	8082	100307035
GO:0019871	sodium channel inhibitor activity	molecular_function	0.12467	1	1	50	20	8082	100307035
GO:0016042	lipid catabolic process	biological_process	0.12475	1	1	50	19	8082	101117211
GO:0034655	nucleobase-containing compound catabolic process	biological_process	0.12574	1	1	50	19	8082	101110460
GO:0010639	negative regulation of organelle organization	biological_process	0.1265	1	1	50	24	8082	101120290
GO:0019901	protein kinase binding	molecular_function	0.12651	1	1	50	17	8082	641303
GO:0006265	DNA topological change	biological_process	0.12726	1	1	50	19	8082	101109436
GO:0016757	transferase activity, transferring glycosyl groups	molecular_function	0.12746	1	3	50	154	8082	1.01108e+26
GO:0098519	nucleotide phosphatase activity, acting on free nucleotides	molecular_function	0.12972	1	1	50	17	8082	443347
GO:0016701	oxidoreductase activity, acting on single donors with incorporation of molecular oxygen	molecular_function	0.12977	1	1	50	19	8082	101102774
GO:0051338	regulation of transferase activity	biological_process	0.13342	1	1	50	20	8082	101120290
GO:0015103	inorganic anion transmembrane transporter activity	molecular_function	0.13469	1	1	50	18	8082	101103519
GO:0010498	proteasomal protein catabolic process	biological_process	0.13683	1	1	50	21	8082	101120290
GO:0043161	proteasome-mediated ubiquitin-dependent protein catabolic process	biological_process	0.13683	1	1	50	21	8082	101120290
GO:0005085	guanyl-nucleotide exchange factor activity	molecular_function	0.13867	1	2	50	64	8082	1.01109e+17
GO:0051537	2 iron, 2 sulfur cluster binding	molecular_function	0.1391	1	1	50	23	8082	443082
GO:0015297	antiporter activity	molecular_function	0.14111	1	1	50	14	8082	101108738
GO:0034702	ion channel complex	cellular_component	0.14438	1	1	50	19	8082	101117907
GO:0034703	cation channel complex	cellular_component	0.14438	1	1	50	19	8082	101117907
GO:0045786	negative regulation of cell cycle	biological_process	0.14904	1	1	50	25	8082	101120290
GO:0032505	reproduction of a single-celled organism	biological_process	0.15055	1	1	50	30	8082	101118923
GO:0043093	FtsZ-dependent cytokinesis	biological_process	0.15055	1	1	50	30	8082	101118923
GO:0010564	regulation of cell cycle process	biological_process	0.1506	1	1	50	24	8082	101120290
GO:0019900	kinase binding	molecular_function	0.15242	1	1	50	20	8082	641303
GO:0051302	regulation of cell division	biological_process	0.15364	1	1	50	26	8082	101120290
GO:0051129	negative regulation of cellular component organization	biological_process	0.15493	1	1	50	29	8082	101120290
GO:0015002	heme-copper terminal oxidase activity	molecular_function	0.15684	1	1	50	28	8082	101117907
GO:0006576	cellular biogenic amine metabolic process	biological_process	0.1578	1	1	50	29	8082	101103204
GO:0044106	cellular amine metabolic process	biological_process	0.1578	1	1	50	29	8082	101103204
GO:0003916	DNA topoisomerase activity	molecular_function	0.15859	1	1	50	23	8082	101109436
GO:0052689	carboxylic ester hydrolase activity	molecular_function	0.15929	1	1	50	24	8082	101121712
GO:0046148	pigment biosynthetic process	biological_process	0.15964	1	1	50	21	8082	101107584
GO:0006816	calcium ion transport	biological_process	0.16132	1	1	50	18	8082	101117907
GO:0006887	exocytosis	biological_process	0.16143	1	1	50	26	8082	101121712
GO:0055114	oxidation-reduction process	biological_process	0.16236	1	6	50	501	8082	1.01113e+50
GO:0044710	single-organism metabolic process	biological_process	0.16255	1	12	50	1248	8082	1.01117e+104
GO:0048519	negative regulation of biological process	biological_process	0.16582	1	2	50	106	8082	1.01103e+17
GO:0016758	transferase activity, transferring hexosyl groups	molecular_function	0.16583	1	2	50	89	8082	1.01109e+17
GO:1902495	transmembrane transporter complex	cellular_component	0.16707	1	1	50	24	8082	101117907
GO:1990351	transporter complex	cellular_component	0.16707	1	1	50	24	8082	101117907
GO:0009057	macromolecule catabolic process	biological_process	0.16754	1	2	50	104	8082	1.0112e+17
GO:0000917	barrier septum assembly	biological_process	0.1738	1	1	50	32	8082	101118923
GO:0032506	cytokinetic process	biological_process	0.1738	1	1	50	32	8082	101118923
GO:0090529	cell septum assembly	biological_process	0.1738	1	1	50	32	8082	101118923
GO:1902410	mitotic cytokinetic process	biological_process	0.1738	1	1	50	32	8082	101118923
GO:0006733	oxidoreduction coenzyme metabolic process	biological_process	0.17419	1	1	50	27	8082	101120850
GO:0005262	calcium channel activity	molecular_function	0.17599	1	1	50	26	8082	101117907
GO:0019318	hexose metabolic process	biological_process	0.17915	1	1	50	28	8082	101116572
GO:0008514	organic anion transmembrane transporter activity	molecular_function	0.17961	1	1	50	37	8082	101119740
GO:0031399	regulation of protein modification process	biological_process	0.17998	1	1	50	28	8082	101120290
GO:0004553	hydrolase activity, hydrolyzing O-glycosyl compounds	molecular_function	0.18042	1	2	50	92	8082	1.01103e+17
GO:0015075	ion transmembrane transporter activity	molecular_function	0.1813	1	6	50	517	8082	1.01109e+53
GO:0050662	coenzyme binding	molecular_function	0.18132	1	2	50	113	8082	1.01107e+17
GO:0044425	membrane part	cellular_component	0.18252	1	14	50	1911	8082	1.01121e+122
GO:0016491	oxidoreductase activity	molecular_function	0.18291	1	6	50	530	8082	1.01103e+50
GO:0044711	single-organism biosynthetic process	biological_process	0.18298	1	4	50	316	8082	1.01107e+35
GO:0015078	hydrogen ion transmembrane transporter activity	molecular_function	0.18915	1	2	50	124	8082	1.01118e+17
GO:0010256	endomembrane system organization	biological_process	0.18915	1	1	50	28	8082	101120915
GO:0022804	active transmembrane transporter activity	molecular_function	0.19027	1	2	50	96	8082	101108738443347
GO:0019954	asexual reproduction	biological_process	0.19048	1	1	50	36	8082	101118923
GO:0098662	inorganic cation transmembrane transport	biological_process	0.19223	1	2	50	118	8082	1.01118e+17
GO:0009308	amine metabolic process	biological_process	0.19319	1	1	50	35	8082	101103204
GO:0031514	motile cilium	cellular_component	0.19398	1	1	50	39	8082	101118923
GO:0015093	ferrous iron transmembrane transporter activity	molecular_function	0.19443	1	1	50	37	8082	101103204
GO:0015684	ferrous iron transport	biological_process	0.19443	1	1	50	37	8082	101103204
GO:0007049	cell cycle	biological_process	0.19565	1	3	50	227	8082	1.01119e+26
GO:0022891	substrate-specific transmembrane transporter activity	molecular_function	0.19581	1	6	50	533	8082	1.01103e+53
GO:0098655	cation transmembrane transport	biological_process	0.19686	1	2	50	120	8082	1.01121e+17
GO:0015698	inorganic anion transport	biological_process	0.19713	1	1	50	28	8082	101103519
GO:0098660	inorganic ion transmembrane transport	biological_process	0.19739	1	2	50	119	8082	1.01118e+17
GO:0015085	calcium ion transmembrane transporter activity	molecular_function	0.19983	1	1	50	30	8082	101117907
GO:0033014	tetrapyrrole biosynthetic process	biological_process	0.20035	1	1	50	30	8082	101107584
GO:0005381	iron ion transmembrane transporter activity	molecular_function	0.20366	1	1	50	38	8082	101103204
GO:0016879	ligase activity, forming carbon-nitrogen bonds	molecular_function	0.20462	1	1	50	30	8082	101107584
GO:0008146	sulfotransferase activity	molecular_function	0.20505	1	1	50	24	8082	101112819
GO:0000003	reproduction	biological_process	0.20676	1	2	50	118	8082	1.01102e+17
GO:0015711	organic anion transport	biological_process	0.20927	1	1	50	47	8082	101119740
GO:0044248	cellular catabolic process	biological_process	0.20995	1	3	50	224	8082	4.43082e+23
GO:0098772	molecular function regulator	molecular_function	0.21015	1	4	50	292	8082	1.00307e+35
GO:0016567	protein ubiquitination	biological_process	0.21036	1	1	50	38	8082	101120290
GO:0016668	oxidoreductase activity, acting on a sulfur group of donors, NAD(P) as acceptor	molecular_function	0.2111	1	1	50	31	8082	101112674
GO:0047134	protein-disulfide reductase activity	molecular_function	0.2111	1	1	50	31	8082	101112674
GO:0016568	chromatin modification	biological_process	0.2118	1	1	50	28	8082	101121782
GO:0005929	cilium	cellular_component	0.2124	1	1	50	43	8082	101118923
GO:0016798	hydrolase activity, acting on glycosyl bonds	molecular_function	0.21437	1	2	50	105	8082	1.01117e+17
GO:0000281	mitotic cytokinesis	biological_process	0.21525	1	1	50	36	8082	101118923
GO:0061640	cytoskeleton-dependent cytokinesis	biological_process	0.21525	1	1	50	36	8082	101118923
GO:1901565	organonitrogen compound catabolic process	biological_process	0.21653	1	1	50	32	8082	443082
GO:0022890	inorganic cation transmembrane transporter activity	molecular_function	0.21899	1	4	50	331	8082	1.01121e+35
GO:0051213	dioxygenase activity	molecular_function	0.21961	1	1	50	29	8082	101102774
GO:0051336	regulation of hydrolase activity	biological_process	0.22116	1	1	50	31	8082	101103249
GO:0046983	protein dimerization activity	molecular_function	0.22295	1	2	50	150	8082	1.0112e+17
GO:0032446	protein modification by small protein conjugation	biological_process	0.22792	1	1	50	41	8082	101120290
GO:0005996	monosaccharide metabolic process	biological_process	0.23096	1	1	50	36	8082	101116572
GO:0071944	cell periphery	cellular_component	0.23468	1	3	50	237	8082	1.01112e+26
GO:0034220	ion transmembrane transport	biological_process	0.23611	1	2	50	149	8082	1.01121e+17
GO:0046873	metal ion transmembrane transporter activity	molecular_function	0.2364	1	3	50	214	8082	1.01118e+26
GO:0015077	monovalent inorganic cation transmembrane transporter activity	molecular_function	0.23705	1	3	50	223	8082	1.01121e+26
GO:0016782	transferase activity, transferring sulfur-containing groups	molecular_function	0.23773	1	1	50	30	8082	101112819
GO:0006826	iron ion transport	biological_process	0.23996	1	1	50	43	8082	101103204
GO:0007067	mitotic nuclear division	biological_process	0.24013	1	1	50	54	8082	101120290
GO:0022892	substrate-specific transporter activity	molecular_function	0.24173	1	6	50	568	8082	1.01104e+53
GO:0000910	cytokinesis	biological_process	0.24822	1	1	50	39	8082	101118923
GO:0048037	cofactor binding	molecular_function	0.25028	1	2	50	135	8082	1.01107e+17
GO:0030312	external encapsulating structure	cellular_component	0.25434	1	1	50	44	8082	101121712
GO:0051726	regulation of cell cycle	biological_process	0.26405	1	1	50	46	8082	101120290
GO:0016051	carbohydrate biosynthetic process	biological_process	0.26519	1	1	50	37	8082	101111372
GO:0004866	endopeptidase inhibitor activity	molecular_function	0.26646	1	1	50	41	8082	101103249
GO:0061135	endopeptidase regulator activity	molecular_function	0.26646	1	1	50	41	8082	101103249
GO:0009108	coenzyme biosynthetic process	biological_process	0.26991	1	1	50	36	8082	101120850
GO:0005887	integral component of plasma membrane	cellular_component	0.27159	1	1	50	39	8082	101112105
GO:0031226	intrinsic component of plasma membrane	cellular_component	0.27159	1	1	50	39	8082	101112105
GO:0032940	secretion by cell	biological_process	0.27264	1	1	50	46	8082	101121712
GO:0046903	secretion	biological_process	0.27264	1	1	50	46	8082	101121712
GO:0042626	ATPase activity, coupled to transmembrane movement of substances	molecular_function	0.27353	1	1	50	49	8082	443347
GO:0043492	ATPase activity, coupled to movement of substances	molecular_function	0.27353	1	1	50	49	8082	443347
GO:0008324	cation transmembrane transporter activity	molecular_function	0.27462	1	4	50	362	8082	1.01109e+35
GO:0022402	cell cycle process	biological_process	0.27506	1	2	50	154	8082	1.01119e+17
GO:0006486	protein glycosylation	biological_process	0.2779	1	1	50	43	8082	101108300
GO:0043413	macromolecule glycosylation	biological_process	0.2779	1	1	50	43	8082	101108300
GO:0098813	nuclear chromosome segregation	biological_process	0.27826	1	1	50	44	8082	101120290
GO:0046915	transition metal ion transmembrane transporter activity	molecular_function	0.28286	1	1	50	50	8082	101103204
GO:0022843	voltage-gated cation channel activity	molecular_function	0.2836	1	1	50	40	8082	101117907
GO:0006325	chromatin organization	biological_process	0.28383	1	1	50	56	8082	101121782
GO:0006261	DNA-dependent DNA replication	biological_process	0.28385	1	1	50	51	8082	101116572
GO:0070085	glycosylation	biological_process	0.28657	1	1	50	44	8082	101108300
GO:0033043	regulation of organelle organization	biological_process	0.28995	1	1	50	59	8082	101120290
GO:0003924	GTPase activity	molecular_function	0.29146	1	2	50	164	8082	443347101103204
GO:0000280	nuclear division	biological_process	0.29607	1	1	50	65	8082	101120290
GO:0015399	primary active transmembrane transporter activity	molecular_function	0.29682	1	1	50	54	8082	443347
GO:0015405	P-P-bond-hydrolysis-driven transmembrane transporter activity	molecular_function	0.29682	1	1	50	54	8082	443347
GO:0009101	glycoprotein biosynthetic process	biological_process	0.29914	1	1	50	46	8082	101108300
GO:0016616	oxidoreductase activity, acting on the CH-OH group of donors, NAD or NADP as acceptor	molecular_function	0.29938	1	1	50	47	8082	101106744
GO:0051536	iron-sulfur cluster binding	molecular_function	0.30028	1	1	50	56	8082	443082
GO:0051540	metal cluster binding	molecular_function	0.30028	1	1	50	56	8082	443082
GO:0071103	DNA conformation change	biological_process	0.30503	1	1	50	61	8082	101109436
GO:0005882	intermediate filament	cellular_component	0.30526	1	1	50	82	8082	101120290
GO:0045111	intermediate filament cytoskeleton	cellular_component	0.30526	1	1	50	82	8082	101120290
GO:0048285	organelle fission	biological_process	0.30722	1	1	50	67	8082	101120290
GO:0005886	plasma membrane	cellular_component	0.31197	1	2	50	157	8082	1.01118e+17
GO:0009100	glycoprotein metabolic process	biological_process	0.31399	1	1	50	48	8082	101108300
GO:0016023	cytoplasmic membrane-bounded vesicle	cellular_component	0.32062	1	1	50	51	8082	101117907
GO:0098797	plasma membrane protein complex	cellular_component	0.32122	1	1	50	60	8082	101117907
GO:0005244	voltage-gated ion channel activity	molecular_function	0.3227	1	1	50	51	8082	101117907
GO:0022832	voltage-gated channel activity	molecular_function	0.3227	1	1	50	51	8082	101117907
GO:0006511	ubiquitin-dependent protein catabolic process	biological_process	0.3247	1	1	50	55	8082	101120290
GO:0019941	modification-dependent protein catabolic process	biological_process	0.3247	1	1	50	55	8082	101120290
GO:0043632	modification-dependent macromolecule catabolic process	biological_process	0.3247	1	1	50	55	8082	101120290
GO:0000041	transition metal ion transport	biological_process	0.3281	1	1	50	61	8082	101103204
GO:0031988	membrane-bounded vesicle	cellular_component	0.33027	1	1	50	52	8082	101117907
GO:0005524	ATP binding	molecular_function	0.33193	1	7	50	698	8082	1.01117e+59
GO:0016614	oxidoreductase activity, acting on CH-OH group of donors	molecular_function	0.33195	1	1	50	52	8082	101106744
GO:0016043	cellular component organization	biological_process	0.33374	1	6	50	707	8082	1.01109e+53
GO:0032559	adenyl ribonucleotide binding	molecular_function	0.33513	1	7	50	700	8082	1.00127e+59
GO:0044257	cellular protein catabolic process	biological_process	0.34042	1	1	50	59	8082	101120290
GO:0051603	proteolysis involved in cellular protein catabolic process	biological_process	0.34042	1	1	50	59	8082	101120290
GO:0030554	adenyl nucleotide binding	molecular_function	0.34143	1	7	50	712	8082	1.00127e+59
GO:0042995	cell projection	cellular_component	0.34313	1	1	50	67	8082	101118923
GO:1901605	alpha-amino acid metabolic process	biological_process	0.34412	1	1	50	57	8082	101107584
GO:0015291	secondary active transmembrane transporter activity	molecular_function	0.34517	1	1	50	39	8082	101108738
GO:0031329	regulation of cellular catabolic process	biological_process	0.34637	1	1	50	53	8082	101120290
GO:0009894	regulation of catabolic process	biological_process	0.34868	1	1	50	55	8082	101120290
GO:0007266	Rho protein signal transduction	biological_process	0.34922	1	1	50	38	8082	101112674
GO:0035023	regulation of Rho protein signal transduction	biological_process	0.34922	1	1	50	38	8082	101112674
GO:0006732	coenzyme metabolic process	biological_process	0.35669	1	1	50	54	8082	101120850
GO:0019899	enzyme binding	molecular_function	0.35679	1	1	50	50	8082	641303
GO:0005525	GTP binding	molecular_function	0.35901	1	2	50	204	8082	443347101103204
GO:0005088	Ras guanyl-nucleotide exchange factor activity	molecular_function	0.36	1	1	50	41	8082	101112674
GO:0005089	Rho guanyl-nucleotide exchange factor activity	molecular_function	0.36	1	1	50	41	8082	101112674
GO:0048870	cell motility	biological_process	0.36133	1	1	50	64	8082	101118923
GO:0051674	localization of cell	biological_process	0.36133	1	1	50	64	8082	101118923
GO:0008238	exopeptidase activity	molecular_function	0.36165	1	1	50	52	8082	101109436
GO:0007059	chromosome segregation	biological_process	0.36296	1	1	50	62	8082	101120290
GO:0032561	guanyl ribonucleotide binding	molecular_function	0.36559	1	2	50	206	8082	443347101103204
GO:0070647	protein modification by small protein conjugation or removal	biological_process	0.36613	1	1	50	64	8082	101120290
GO:0030163	protein catabolic process	biological_process	0.36641	1	1	50	65	8082	101120290
GO:0008200	ion channel inhibitor activity	molecular_function	0.36659	1	1	50	59	8082	100307035
GO:0016248	channel inhibitor activity	molecular_function	0.36659	1	1	50	59	8082	100307035
GO:0030414	peptidase inhibitor activity	molecular_function	0.36845	1	1	50	54	8082	101103249
GO:0061134	peptidase regulator activity	molecular_function	0.36845	1	1	50	54	8082	101103249
GO:0044702	single organism reproductive process	biological_process	0.36919	1	1	50	58	8082	101101882
GO:0019001	guanyl nucleotide binding	molecular_function	0.36975	1	2	50	207	8082	443347101103204
GO:0051128	regulation of cellular component organization	biological_process	0.37085	1	1	50	82	8082	101120290
GO:0031410	cytoplasmic vesicle	cellular_component	0.37247	1	1	50	63	8082	101117907
GO:0007265	Ras protein signal transduction	biological_process	0.37597	1	1	50	42	8082	101112674
GO:0046578	regulation of Ras protein signal transduction	biological_process	0.37597	1	1	50	42	8082	101112674
GO:0071840	cellular component organization or biogenesis	biological_process	0.37919	1	6	50	753	8082	1.01109e+53
GO:0044802	single-organism membrane organization	biological_process	0.37974	1	1	50	65	8082	101120915
GO:0016820	hydrolase activity, acting on acid anhydrides, catalyzing transmembrane movement of substances	molecular_function	0.38023	1	1	50	68	8082	443347
GO:0031982	vesicle	cellular_component	0.38139	1	1	50	64	8082	101117907
GO:0003824	catalytic activity	molecular_function	0.38237	1	24	50	3093	8082	1.01109e+209
GO:0006813	potassium ion transport	biological_process	0.38626	1	1	50	55	8082	101120872
GO:0007264	small GTPase mediated signal transduction	biological_process	0.391	1	2	50	173	8082	1.01113e+17
GO:0019953	sexual reproduction	biological_process	0.3922	1	1	50	65	8082	101101882
GO:0044703	multi-organism reproductive process	biological_process	0.3922	1	1	50	65	8082	101101882
GO:0007155	cell adhesion	biological_process	0.39262	1	2	50	163	8082	1.01102e+17
GO:0016020	membrane	cellular_component	0.39439	1	18	50	2671	8082	1.01109e+158
GO:0022610	biological adhesion	biological_process	0.39764	1	2	50	164	8082	1.01102e+17
GO:0016247	channel regulator activity	molecular_function	0.39901	1	1	50	64	8082	100307035
GO:0051056	regulation of small GTPase mediated signal transduction	biological_process	0.39991	1	1	50	45	8082	101112674
GO:0006629	lipid metabolic process	biological_process	0.40882	1	2	50	186	8082	1.01117e+17
GO:0000166	nucleotide binding	molecular_function	0.41828	1	8	50	936	8082	1.01117e+68
GO:1901265	nucleoside phosphate binding	molecular_function	0.41828	1	8	50	936	8082	1.01103e+68
GO:0015079	potassium ion transmembrane transporter activity	molecular_function	0.4211	1	1	50	60	8082	101120872
GO:0009055	electron carrier activity	molecular_function	0.42179	1	1	50	94	8082	101117907
GO:0006260	DNA replication	biological_process	0.4228	1	2	50	188	8082	1.01109e+17
GO:0022414	reproductive process	biological_process	0.42734	1	1	50	73	8082	101101882
GO:0008610	lipid biosynthetic process	biological_process	0.43332	1	1	50	83	8082	101106744
GO:0016651	oxidoreductase activity, acting on NAD(P)H	molecular_function	0.43837	1	1	50	75	8082	101112674
GO:0035639	purine ribonucleoside triphosphate binding	molecular_function	0.44372	1	7	50	822	8082	4.43347e+59
GO:0001883	purine nucleoside binding	molecular_function	0.44698	1	7	50	824	8082	1.00127e+59
GO:0032549	ribonucleoside binding	molecular_function	0.44698	1	7	50	824	8082	1.01109e+59
GO:0032550	purine ribonucleoside binding	molecular_function	0.44698	1	7	50	824	8082	1.01122e+59
GO:0016705	oxidoreductase activity, acting on paired donors, with incorporation or reduction of molecular oxygen	molecular_function	0.4488	1	1	50	68	8082	443082
GO:0016301	kinase activity	molecular_function	0.4489	1	4	50	439	8082	1.01117e+32
GO:0032555	purine ribonucleotide binding	molecular_function	0.45009	1	7	50	826	8082	1.01117e+59
GO:0036094	small molecule binding	molecular_function	0.45201	1	8	50	961	8082	1.01109e+68
GO:0001882	nucleoside binding	molecular_function	0.45454	1	7	50	829	8082	1.01117e+59
GO:0042623	ATPase activity, coupled	molecular_function	0.45609	1	1	50	85	8082	443347
GO:0017076	purine nucleotide binding	molecular_function	0.45843	1	7	50	839	8082	1.00127e+59
GO:0048193	Golgi vesicle transport	biological_process	0.45865	1	1	50	81	8082	101104742
GO:0030117	membrane coat	cellular_component	0.45875	1	1	50	60	8082	101110460
GO:0048475	coated membrane	cellular_component	0.45875	1	1	50	60	8082	101110460
GO:0015979	photosynthesis	biological_process	0.46167	1	1	50	81	8082	101107584
GO:0016071	mRNA metabolic process	biological_process	0.4635	1	1	50	91	8082	101110460
GO:0032553	ribonucleotide binding	molecular_function	0.46511	1	7	50	837	8082	1.01109e+59
GO:0005179	hormone activity	molecular_function	0.46825	1	1	50	94	8082	101101931
GO:0004222	metalloendopeptidase activity	molecular_function	0.47033	1	1	50	68	8082	101115035
GO:0061024	membrane organization	biological_process	0.47099	1	1	50	87	8082	101120915
GO:0016310	phosphorylation	biological_process	0.47792	1	3	50	301	8082	1.0111e+26
GO:0044283	small molecule biosynthetic process	biological_process	0.48247	1	1	50	102	8082	101120850
GO:0009987	cellular process	biological_process	0.48529	1	30	50	4809	8082	101121712,101117907,101108300,101108218,101121782,101101882,101110460,101103249,101117211,101101931,101109436,101120850,443347,101107584,100127210,101112674,101120915,101118936,101108820,443082,101118923,101107275,101120290,101103204,101109529,101120872,101103519,101103105,101108738,101116572
GO:0004672	protein kinase activity	molecular_function	0.48916	1	3	50	300	8082	1.0111e+26
GO:0016787	hydrolase activity	molecular_function	0.49585	1	11	50	1413	8082	1.01122e+95
GO:0006508	proteolysis	biological_process	0.49702	1	3	50	376	8082	1.01109e+26
GO:0051649	establishment of localization in cell	biological_process	0.49732	1	3	50	352	8082	1.01105e+26
GO:1902531	regulation of intracellular signal transduction	biological_process	0.49891	1	1	50	66	8082	101112674
GO:0016874	ligase activity	molecular_function	0.5019	1	1	50	101	8082	101107584
GO:0031012	extracellular matrix	cellular_component	0.50907	1	1	50	84	8082	101115035
GO:0008234	cysteine-type peptidase activity	molecular_function	0.5154	1	1	50	83	8082	101108738
GO:0004857	enzyme inhibitor activity	molecular_function	0.51991	1	1	50	88	8082	101103249
GO:0035556	intracellular signal transduction	biological_process	0.52598	1	3	50	339	8082	1.01108e+26
GO:0097367	carbohydrate derivative binding	molecular_function	0.53021	1	7	50	881	8082	1.01103e+59
GO:0005783	endoplasmic reticulum	cellular_component	0.53417	1	1	50	110	8082	101104742
GO:0005737	cytoplasm	cellular_component	0.53439	1	6	50	1012	8082	1.01105e+53
GO:0005515	protein binding	molecular_function	0.53796	1	19	50	2450	8082	1.01109e+167
GO:0070011	peptidase activity, acting on L-amino acid peptides	molecular_function	0.55084	1	3	50	379	8082	1.01109e+26
GO:0040011	locomotion	biological_process	0.55791	1	1	50	109	8082	101118923
GO:0051641	cellular localization	biological_process	0.55832	1	3	50	380	8082	1.01105e+26
GO:0005623	cell	cellular_component	0.56468	1	14	50	2283	8082	1.01122e+125
GO:0044464	cell part	cellular_component	0.56468	1	14	50	2283	8082	1.01118e+125
GO:0006996	organelle organization	biological_process	0.56759	1	3	50	429	8082	1.01109e+26
GO:1901564	organonitrogen compound metabolic process	biological_process	0.57039	1	4	50	754	8082	1.01108e+32
GO:0006928	movement of cell or subcellular component	biological_process	0.57115	1	1	50	100	8082	101118923
GO:0008237	metallopeptidase activity	molecular_function	0.57183	1	1	50	86	8082	101115035
GO:0004674	protein serine/threonine kinase activity	molecular_function	0.57274	1	1	50	89	8082	101110460
GO:0016818	hydrolase activity, acting on acid anhydrides, in phosphorus-containing anhydrides	molecular_function	0.57649	1	3	50	414	8082	1.01103e+23
GO:0005261	cation channel activity	molecular_function	0.57771	1	1	50	101	8082	101117907
GO:0043226	organelle	cellular_component	0.58779	1	10	50	1692	8082	1.0112e+89
GO:0006259	DNA metabolic process	biological_process	0.59166	1	3	50	450	8082	1.01117e+26
GO:0008233	peptidase activity	molecular_function	0.59438	1	3	50	403	8082	1.01115e+26
GO:0044424	intracellular part	cellular_component	0.60184	1	12	50	1992	8082	1.01122e+107
GO:0016773	phosphotransferase activity, alcohol group as acceptor	molecular_function	0.61728	1	3	50	372	8082	1.01117e+26
GO:0003779	actin binding	molecular_function	0.61751	1	1	50	121	8082	101106932
GO:0043232	intracellular non-membrane-bounded organelle	cellular_component	0.62679	1	3	50	641	8082	1.0112e+26
GO:0019028	viral capsid	cellular_component	0.62938	1	1	50	148	8082	101120290
GO:0006520	cellular amino acid metabolic process	biological_process	0.62996	1	1	50	134	8082	101107584
GO:0016829	lyase activity	molecular_function	0.63072	1	1	50	131	8082	101108734
GO:0007165	signal transduction	biological_process	0.63328	1	7	50	1444	8082	1.01113e+62
GO:0005694	chromosome	cellular_component	0.63419	1	1	50	153	8082	101109436
GO:0003735	structural constituent of ribosome	molecular_function	0.63498	1	1	50	315	8082	101108300
GO:0004888	transmembrane signaling receptor activity	molecular_function	0.63801	1	2	50	754	8082	1.01113e+17
GO:0009966	regulation of signal transduction	biological_process	0.63874	1	1	50	107	8082	101112674
GO:1901137	carbohydrate derivative biosynthetic process	biological_process	0.64044	1	1	50	144	8082	101108300
GO:0044700	single organism signaling	biological_process	0.64477	1	7	50	1452	8082	1.01107e+62
GO:0043168	anion binding	molecular_function	0.64591	1	7	50	978	8082	1.01109e+59
GO:0043228	non-membrane-bounded organelle	cellular_component	0.64779	1	3	50	653	8082	1.01108e+26
GO:0023052	signaling	biological_process	0.65122	1	7	50	1457	8082	1.01103e+62
GO:0044444	cytoplasmic part	cellular_component	0.65198	1	4	50	804	8082	1.01108e+35
GO:0016817	hydrolase activity, acting on acid anhydrides	molecular_function	0.65326	1	3	50	463	8082	4.43347e+23
GO:0022836	gated channel activity	molecular_function	0.65462	1	1	50	129	8082	101117907
GO:0010646	regulation of cell communication	biological_process	0.65617	1	1	50	111	8082	101112674
GO:0023051	regulation of signaling	biological_process	0.65648	1	1	50	112	8082	101112674
GO:0098796	membrane protein complex	cellular_component	0.65703	1	2	50	311	8082	1.01118e+17
GO:0005840	ribosome	cellular_component	0.65932	1	1	50	318	8082	101108300
GO:0007154	cell communication	biological_process	0.66196	1	7	50	1475	8082	1.01107e+62
GO:0006464	cellular protein modification process	biological_process	0.66292	1	4	50	575	8082	1.0112e+35
GO:0036211	protein modification process	biological_process	0.66292	1	4	50	575	8082	1.01117e+35
GO:0071704	organic substance metabolic process	biological_process	0.67044	1	20	50	3178	8082	1.0111e+176
GO:0038023	signaling receptor activity	molecular_function	0.67528	1	2	50	777	8082	1.01103e+17
GO:0005622	intracellular	cellular_component	0.67633	1	12	50	2115	8082	1.01109e+107
GO:0006468	protein phosphorylation	biological_process	0.67785	1	2	50	260	8082	1.00127e+17
GO:1901576	organic substance biosynthetic process	biological_process	0.6891	1	10	50	1787	8082	1.01117e+89
GO:0046907	intracellular transport	biological_process	0.69067	1	2	50	309	8082	1.0111e+17
GO:0043229	intracellular organelle	cellular_component	0.69579	1	9	50	1666	8082	1.01109e+80
GO:0048583	regulation of response to stimulus	biological_process	0.6976	1	1	50	133	8082	101112674
GO:0016740	transferase activity	molecular_function	0.70367	1	8	50	1215	8082	1.00127e+68
GO:0005488	binding	molecular_function	0.70407	1	32	50	4755	8082	101112674,100127210,101122921,101102774,101120915,101117246,641303,101103204,101109529,101117907,101110460,101106744,101101882,101101931,101106932,443347,101109436,101108825,443082,101107275,101103519,101117995,101103105,101111372,101116572,101110593,101111770,101121782,101108218,101117211,101120120,101107584
GO:0080090	regulation of primary metabolic process	biological_process	0.70497	1	5	50	867	8082	1.01104e+44
GO:0060255	regulation of macromolecule metabolic process	biological_process	0.71182	1	5	50	874	8082	1.01104e+44
GO:0030234	enzyme regulator activity	molecular_function	0.71734	1	1	50	167	8082	101103249
GO:0016791	phosphatase activity	molecular_function	0.72062	1	1	50	133	8082	443347
GO:0004872	receptor activity	molecular_function	0.72383	1	2	50	803	8082	1.01113e+17
GO:0008152	metabolic process	biological_process	0.72456	1	23	50	3700	8082	1.01113e+203
GO:0009058	biosynthetic process	biological_process	0.72546	1	10	50	1827	8082	1.01104e+89
GO:0046872	metal ion binding	molecular_function	0.72803	1	9	50	1373	8082	1.01103e+80
GO:0005198	structural molecule activity	molecular_function	0.72939	1	2	50	540	8082	1.01108e+17
GO:0016887	ATPase activity	molecular_function	0.73398	1	1	50	165	8082	443347
GO:0006807	nitrogen compound metabolic process	biological_process	0.73414	1	12	50	2164	8082	1.01104e+104
GO:0043169	cation binding	molecular_function	0.73555	1	9	50	1380	8082	1.01109e+80
GO:0043565	sequence-specific DNA binding	molecular_function	0.74129	1	1	50	191	8082	101103519
GO:0031323	regulation of cellular metabolic process	biological_process	0.74326	1	5	50	895	8082	1.0112e+44
GO:0009405	pathogenesis	biological_process	0.74688	1	1	50	179	8082	100307035
GO:0015672	monovalent inorganic cation transport	biological_process	0.74706	1	1	50	182	8082	101120872
GO:0044430	cytoskeletal part	cellular_component	0.74746	1	1	50	205	8082	101120290
GO:0043412	macromolecule modification	biological_process	0.7513	1	4	50	653	8082	1.01108e+35
GO:1902582	single-organism intracellular transport	biological_process	0.75324	1	1	50	198	8082	101104742
GO:0044281	small molecule metabolic process	biological_process	0.7553	1	2	50	383	8082	1.01108e+17
GO:0017111	nucleoside-triphosphatase activity	molecular_function	0.75853	1	2	50	373	8082	101103204443347
GO:0016772	transferase activity, transferring phosphorus-containing groups	molecular_function	0.75912	1	4	50	663	8082	1.01117e+32
GO:0019752	carboxylic acid metabolic process	biological_process	0.76625	1	1	50	194	8082	101107584
GO:0051716	cellular response to stimulus	biological_process	0.76799	1	7	50	1617	8082	1.01113e+62
GO:0030529	ribonucleoprotein complex	cellular_component	0.76941	1	1	50	373	8082	101108300
GO:0016462	pyrophosphatase activity	molecular_function	0.77005	1	2	50	380	8082	443347101103204
GO:1901360	organic cyclic compound metabolic process	biological_process	0.77037	1	10	50	1742	8082	1.01122e+86
GO:0034641	cellular nitrogen compound metabolic process	biological_process	0.77097	1	11	50	2067	8082	1.01122e+95
GO:0005856	cytoskeleton	cellular_component	0.77258	1	1	50	217	8082	101120290
GO:0006412	translation	biological_process	0.7742	1	1	50	398	8082	101108300
GO:0005576	extracellular region	cellular_component	0.78034	1	3	50	590	8082	1.01109e+26
GO:0019222	regulation of metabolic process	biological_process	0.78098	1	5	50	936	8082	1.01122e+44
GO:1902589	single-organism organelle organization	biological_process	0.78202	1	1	50	209	8082	101120290
GO:0043436	oxoacid metabolic process	biological_process	0.78328	1	1	50	204	8082	101107584
GO:0051704	multi-organism process	biological_process	0.78495	1	3	50	552	8082	1.00307e+26
GO:0043043	peptide biosynthetic process	biological_process	0.78637	1	1	50	404	8082	101108300
GO:0044423	virion part	cellular_component	0.78743	1	1	50	221	8082	101120290
GO:0006082	organic acid metabolic process	biological_process	0.78837	1	1	50	207	8082	101107584
GO:1901135	carbohydrate derivative metabolic process	biological_process	0.79249	1	1	50	226	8082	101108300
GO:1901566	organonitrogen compound biosynthetic process	biological_process	0.79955	1	2	50	603	8082	1.01108e+17
GO:0044267	cellular protein metabolic process	biological_process	0.79976	1	5	50	1064	8082	1.01108e+44
GO:0004871	signal transducer activity	molecular_function	0.79981	1	2	50	875	8082	1.01113e+17
GO:0012505	endomembrane system	cellular_component	0.80169	1	1	50	222	8082	101104742
GO:0043604	amide biosynthetic process	biological_process	0.80393	1	1	50	414	8082	101108300
GO:0006518	peptide metabolic process	biological_process	0.80441	1	1	50	416	8082	101108300
GO:0006793	phosphorus metabolic process	biological_process	0.80482	1	3	50	515	8082	1.0111e+26
GO:0006796	phosphate-containing compound metabolic process	biological_process	0.80482	1	3	50	515	8082	1.01117e+26
GO:0019012	virion	cellular_component	0.81056	1	1	50	235	8082	101120290
GO:0071702	organic substance transport	biological_process	0.81572	1	2	50	419	8082	1.0112e+17
GO:0043167	ion binding	molecular_function	0.8165	1	14	50	2186	8082	1.01117e+122
GO:0042578	phosphoric ester hydrolase activity	molecular_function	0.81732	1	1	50	171	8082	443347
GO:0043231	intracellular membrane-bounded organelle	cellular_component	0.82252	1	6	50	1196	8082	1.01104e+53
GO:0043227	membrane-bounded organelle	cellular_component	0.82389	1	6	50	1197	8082	1.01115e+53
GO:0005634	nucleus	cellular_component	0.82551	1	4	50	843	8082	1.01104e+35
GO:0004930	G-protein coupled receptor activity	molecular_function	0.82599	1	1	50	701	8082	101103105
GO:0044403	symbiosis, encompassing mutualism through parasitism	biological_process	0.8266	1	1	50	243	8082	101111372
GO:0050794	regulation of cellular process	biological_process	0.82777	1	11	50	2337	8082	1.01113e+98
GO:0044419	interspecies interaction between organisms	biological_process	0.83006	1	1	50	245	8082	101111372
GO:0043603	cellular amide metabolic process	biological_process	0.83151	1	1	50	433	8082	101108300
GO:0060089	molecular transducer activity	molecular_function	0.83196	1	2	50	901	8082	1.01113e+17
GO:0043933	macromolecular complex subunit organization	biological_process	0.83313	1	1	50	287	8082	101121782
GO:0005216	ion channel activity	molecular_function	0.8334	1	1	50	210	8082	101117907
GO:0022838	substrate-specific channel activity	molecular_function	0.8334	1	1	50	210	8082	101117907
GO:0015267	channel activity	molecular_function	0.83581	1	1	50	212	8082	101117907
GO:0022803	passive transmembrane transporter activity	molecular_function	0.83581	1	1	50	212	8082	101117907
GO:0008092	cytoskeletal protein binding	molecular_function	0.8419	1	1	50	223	8082	101106932
GO:0044237	cellular metabolic process	biological_process	0.84505	1	16	50	2889	8082	1.01117e+140
GO:0006886	intracellular protein transport	biological_process	0.84996	1	1	50	233	8082	101110460
GO:0043234	protein complex	cellular_component	0.85276	1	4	50	851	8082	1.01118e+35
GO:0016788	hydrolase activity, acting on ester bonds	molecular_function	0.85446	1	2	50	398	8082	443347101121712
GO:0046483	heterocycle metabolic process	biological_process	0.8551	1	9	50	1724	8082	1.01122e+77
GO:0005102	receptor binding	molecular_function	0.8554	1	1	50	311	8082	101101931
GO:0032991	macromolecular complex	cellular_component	0.85666	1	5	50	1200	8082	1.0111e+44
GO:0006725	cellular aromatic compound metabolic process	biological_process	0.85675	1	9	50	1731	8082	1.01122e+77
GO:0044238	primary metabolic process	biological_process	0.85791	1	17	50	3055	8082	1.01104e+152
GO:0019538	protein metabolic process	biological_process	0.86659	1	6	50	1338	8082	1.01109e+53
GO:0050789	regulation of biological process	biological_process	0.86682	1	11	50	2403	8082	1.01103e+98
GO:0097159	organic cyclic compound binding	molecular_function	0.87209	1	12	50	2296	8082	1.01109e+101
GO:1901363	heterocyclic compound binding	molecular_function	0.87209	1	12	50	2296	8082	1.01122e+101
GO:0044249	cellular biosynthetic process	biological_process	0.87438	1	8	50	1757	8082	1.01108e+71
GO:0022607	cellular component assembly	biological_process	0.87639	1	1	50	328	8082	101118923
GO:1901362	organic cyclic compound biosynthetic process	biological_process	0.8779	1	5	50	1108	8082	1.01103e+44
GO:0005509	calcium ion binding	molecular_function	0.87906	1	1	50	246	8082	101101882
GO:0044260	cellular macromolecule metabolic process	biological_process	0.88328	1	12	50	2382	8082	1.00127e+107
GO:0003723	RNA binding	molecular_function	0.8839	1	1	50	324	8082	101110593
GO:0034613	cellular protein localization	biological_process	0.88414	1	1	50	262	8082	101110460
GO:0070727	cellular macromolecule localization	biological_process	0.88414	1	1	50	262	8082	101110460
GO:0004175	endopeptidase activity	molecular_function	0.88723	1	1	50	301	8082	101115035
GO:0007186	G-protein coupled receptor signaling pathway	biological_process	0.89152	1	1	50	792	8082	101103105
GO:0065007	biological regulation	biological_process	0.89701	1	11	50	2482	8082	1.01122e+98
GO:0001071	nucleic acid binding transcription factor activity	molecular_function	0.89813	1	1	50	326	8082	101103105
GO:0003700	transcription factor activity, sequence-specific DNA binding	molecular_function	0.89813	1	1	50	326	8082	101103105
GO:0015031	protein transport	biological_process	0.90089	1	1	50	292	8082	101110460
GO:0045184	establishment of protein localization	biological_process	0.90301	1	1	50	296	8082	101110460
GO:0003677	DNA binding	molecular_function	0.90554	1	4	50	1035	8082	1.01109e+32
GO:0044085	cellular component biogenesis	biological_process	0.90653	1	1	50	376	8082	101118923
GO:0090304	nucleic acid metabolic process	biological_process	0.90887	1	7	50	1524	8082	1.01104e+62
GO:0034645	cellular macromolecule biosynthetic process	biological_process	0.9104	1	6	50	1510	8082	1.01104e+53
GO:0050896	response to stimulus	biological_process	0.91586	1	7	50	1924	8082	1.01107e+62
GO:0009059	macromolecule biosynthetic process	biological_process	0.91714	1	6	50	1528	8082	1.01103e+53
GO:0006355	regulation of transcription, DNA-templated	biological_process	0.92083	1	3	50	801	8082	1.01103e+26
GO:1903506	regulation of nucleic acid-templated transcription	biological_process	0.92083	1	3	50	801	8082	1.01122e+26
GO:2001141	regulation of RNA biosynthetic process	biological_process	0.92126	1	3	50	804	8082	1.01103e+26
GO:0051252	regulation of RNA metabolic process	biological_process	0.9218	1	3	50	806	8082	1.01122e+26
GO:0008104	protein localization	biological_process	0.92364	1	1	50	321	8082	101110460
GO:0019219	regulation of nucleobase-containing compound metabolic process	biological_process	0.92392	1	3	50	814	8082	1.01103e+26
GO:2000112	regulation of cellular macromolecule biosynthetic process	biological_process	0.92393	1	3	50	816	8082	1.01104e+26
GO:0010556	regulation of macromolecule biosynthetic process	biological_process	0.92435	1	3	50	819	8082	1.01104e+26
GO:0031326	regulation of cellular biosynthetic process	biological_process	0.92435	1	3	50	819	8082	1.01104e+26
GO:0009889	regulation of biosynthetic process	biological_process	0.92441	1	3	50	820	8082	1.01122e+26
GO:0051171	regulation of nitrogen compound metabolic process	biological_process	0.9254	1	3	50	823	8082	1.01104e+26
GO:0043170	macromolecule metabolic process	biological_process	0.92594	1	13	50	2665	8082	1.00127e+116
GO:0010468	regulation of gene expression	biological_process	0.92704	1	3	50	826	8082	1.01104e+26
GO:0003676	nucleic acid binding	molecular_function	0.9381	1	6	50	1551	8082	1.01122e+50
GO:0019438	aromatic compound biosynthetic process	biological_process	0.94245	1	4	50	1088	8082	1.01104e+35
GO:0018130	heterocycle biosynthetic process	biological_process	0.94651	1	4	50	1096	8082	1.01122e+35
GO:0044271	cellular nitrogen compound biosynthetic process	biological_process	0.94719	1	5	50	1469	8082	1.01103e+44
GO:0006139	nucleobase-containing compound metabolic process	biological_process	0.95321	1	7	50	1674	8082	1.01109e+62
GO:0033036	macromolecule localization	biological_process	0.95481	1	1	50	392	8082	101110460
GO:0006351	transcription, DNA-templated	biological_process	0.95632	1	3	50	943	8082	1.01122e+26
GO:0097659	nucleic acid-templated transcription	biological_process	0.95632	1	3	50	943	8082	1.01103e+26
GO:0032774	RNA biosynthetic process	biological_process	0.95891	1	3	50	955	8082	1.01104e+26
GO:0016070	RNA metabolic process	biological_process	0.97181	1	4	50	1231	8082	1.0111e+35
GO:0034654	nucleobase-containing compound biosynthetic process	biological_process	0.97546	1	3	50	1042	8082	1.01103e+26
GO:0046914	transition metal ion binding	molecular_function	0.9805	1	2	50	803	8082	1.01117e+17
GO:0010467	gene expression	biological_process	0.9881	1	4	50	1557	8082	1.01122e+35
GO:0008270	zinc ion binding	molecular_function	0.99281	1	1	50	671	8082	101116572
GO:0044446	intracellular organelle part	cellular_component	0.99622	1	1	50	780	8082	101120290
GO:0044422	organelle part	cellular_component	0.99639	1	1	50	786	8082	101120290

## Sheet: circRNA_KEGG
##Databases: KEGG PATHWAY
##Statistical test method: hypergeometric test / Fisher's exact test
##FDR correction method: Benjamini and Hochberg
#Term	Database	ID	Input number	Background number	P-Value	Corrected P-Value	Input	KEGG_ID/KO	Entrez_ID	Hyperlink
N-Glycan biosynthesis	KEGG PATHWAY	oas00510	4	48	0.00173213	0.221713	101108820|101108300|101116572|101111372	oas:101108820|oas:101108300|oas:101116572|oas:101111372|	101108820|101108300|101116572|101111372|	http://www.genome.jp/kegg-bin/show_pathway?oas00510/oas:101108820%09red/oas:101116572%09red/oas:101108300%09red/oas:101111372%09red
Fc epsilon RI signaling pathway	KEGG PATHWAY	oas04664	4	66	0.00511029	0.285377	101102732|101122126|101105725|101117211	oas:101102732|oas:101122126|oas:101105725|oas:101117211|	101102732|101122126|101105725|101117211|	http://www.genome.jp/kegg-bin/show_pathway?oas04664/oas:101105725%09red/oas:101102732%09red/oas:101122126%09red/oas:101117211%09red
Alanine, aspartate and glutamate metabolism	KEGG PATHWAY	oas00250	3	36	0.00668853	0.285377	101116643|101121723|101107584	oas:101116643|oas:101121723|oas:101107584|	101116643|101121723|101107584|	http://www.genome.jp/kegg-bin/show_pathway?oas00250/oas:101116643%09red/oas:101121723%09red/oas:101107584%09red
AMPK signaling pathway	KEGG PATHWAY	oas04152	5	126	0.00980955	0.313905	100127210|443513|443270|101117211|443347	oas:100127210|oas:443513|oas:443270|oas:101117211|oas:443347|	100127210|443513|443270|101117211|443347|	http://www.genome.jp/kegg-bin/show_pathway?oas04152/oas:100127210%09red/oas:443347%09red/oas:101117211%09red/oas:443513%09red/oas:443270%09red
Insulin signaling pathway	KEGG PATHWAY	oas04910	5	144	0.0163671	0.344063	101110353|100127210|101102732|443270|101117211	oas:101110353|oas:100127210|oas:101102732|oas:443270|oas:101117211|	101110353|100127210|101102732|443270|101117211|	http://www.genome.jp/kegg-bin/show_pathway?oas04910/oas:100127210%09red/oas:101110353%09red/oas:101117211%09red/oas:101102732%09red/oas:443270%09red
Nitrogen metabolism	KEGG PATHWAY	oas00910	2	18	0.0164123	0.344063	101113341|101107584	oas:101113341|oas:101107584|	101113341|101107584|	http://www.genome.jp/kegg-bin/show_pathway?oas00910/oas:101113341%09red/oas:101107584%09red
Non-small cell lung cancer	KEGG PATHWAY	oas05223	3	54	0.018816	0.344063	101102732|101122126|101117211	oas:101102732|oas:101122126|oas:101117211|	101102732|101122126|101117211|	http://www.genome.jp/kegg-bin/show_pathway?oas05223/oas:101102732%09red/oas:101122126%09red/oas:101117211%09red
Metabolic pathways	KEGG PATHWAY	oas01100	20	1256	0.0284586	0.440726	101101931|101122126|101106744|101103801|101112105|101108820|101116033|101120515|101111372|101116572|101112819|101116643|101121723|101121732|101108300|101121475|101107584|101122795|101108320|101102774	oas:101101931|oas:101122126|oas:101106744|oas:101103801|oas:101112105|oas:101108820|oas:101116033|oas:101120515|oas:101111372|oas:101116572|oas:101112819|oas:101116643|oas:101121723|oas:101121732|oas:101108300|oas:101121475|oas:101107584|oas:101122795|oas:101108320|oas:101102774|	101101931|101122126|101106744|101103801|101112105|101108820|101116033|101120515|101111372|101116572|101112819|101116643|101121723|101121732|101108300|101121475|101107584|101122795|101108320|101102774|	http://www.genome.jp/kegg-bin/show_pathway?oas01100/oas:101116572%09red/oas:101103801%09red/oas:101122795%09red/oas:101108820%09red/oas:101108300%09red/oas:101106744%09red/oas:101102774%09red/oas:101116033%09red/oas:101120515%09red/oas:101121475%09red/oas:101116643%09red/oas:101121732%09red/oas:101121723%09red/oas:101108320%09red/oas:101107584%09red/oas:101112105%09red/oas:101101931%09red/oas:101…
B cell receptor signaling pathway	KEGG PATHWAY	oas04662	3	69	0.0344646	0.440726	101102732|101122126|101105725	oas:101102732|oas:101122126|oas:101105725|	101102732|101122126|101105725|	http://www.genome.jp/kegg-bin/show_pathway?oas04662/oas:101105725%09red/oas:101102732%09red/oas:101122126%09red
PPAR signaling pathway	KEGG PATHWAY	oas03320	3	70	0.0356876	0.440726	443513|101117211|101121475	oas:443513|oas:101117211|oas:101121475|	443513|101117211|101121475|	http://www.genome.jp/kegg-bin/show_pathway?oas03320/oas:443513%09red/oas:101121475%09red/oas:101117211%09red
Adipocytokine signaling pathway	KEGG PATHWAY	oas04920	3	74	0.0408001	0.440726	100127210|443270|101121475	oas:100127210|oas:443270|oas:101121475|	100127210|443270|101121475|	http://www.genome.jp/kegg-bin/show_pathway?oas04920/oas:100127210%09red/oas:101121475%09red/oas:443270%09red
Hypertrophic cardiomyopathy (HCM)	KEGG PATHWAY	oas05410	3	77	0.0448635	0.440726	100127210|101117907|101115445	oas:100127210|oas:101117907|oas:101115445|	100127210|101117907|101115445|	http://www.genome.jp/kegg-bin/show_pathway?oas05410/oas:100127210%09red/oas:101117907%09red/oas:101115445%09red
FoxO signaling pathway	KEGG PATHWAY	oas04068	4	132	0.0461589	0.440726	100307035|100127210|101102732|101117211	oas:100307035|oas:100127210|oas:101102732|oas:101117211|	100307035|100127210|101102732|101117211|	http://www.genome.jp/kegg-bin/show_pathway?oas04068/oas:100127210%09red/oas:100307035%09red/oas:101102732%09red/oas:101117211%09red
Phosphatidylinositol signaling system	KEGG PATHWAY	oas04070	3	80	0.0491202	0.440726	101122126|101120515|101108320	oas:101122126|oas:101120515|oas:101108320|	101122126|101120515|101108320|	http://www.genome.jp/kegg-bin/show_pathway?oas04070/oas:101120515%09red/oas:101122126%09red/oas:101108320%09red
Bile secretion	KEGG PATHWAY	oas04976	3	83	0.0535669	0.440726	101113341|101119842|443347	oas:101113341|oas:101119842|oas:443347|	101113341|101119842|443347|	http://www.genome.jp/kegg-bin/show_pathway?oas04976/oas:443347%09red/oas:101119842%09red/oas:101113341%09red
Peroxisome	KEGG PATHWAY	oas04146	3	84	0.0550908	0.440726	100307035|101106744|101121475	oas:100307035|oas:101106744|oas:101121475|	100307035|101106744|101121475|	http://www.genome.jp/kegg-bin/show_pathway?oas04146/oas:100307035%09red/oas:101106744%09red/oas:101121475%09red
Focal adhesion	KEGG PATHWAY	oas04510	5	210	0.0626702	0.47187	101102732|101117205|101115445|101117211|641303	oas:101102732|oas:101117205|oas:101115445|oas:101117211|oas:641303|	101102732|101117205|101115445|101117211|641303|	http://www.genome.jp/kegg-bin/show_pathway?oas04510/oas:641303%09red/oas:101117205%09red/oas:101115445%09red/oas:101102732%09red/oas:101117211%09red
Carbohydrate digestion and absorption	KEGG PATHWAY	oas04973	2	43	0.0728871	0.482047	443205|101102774	oas:443205|oas:101102774|	443205|101102774|	http://www.genome.jp/kegg-bin/show_pathway?oas04973/oas:101102774%09red/oas:443205%09red
Regulation of actin cytoskeleton	KEGG PATHWAY	oas04810	5	220	0.0730131	0.482047	101102732|101117205|101115445|101106932|641303	oas:101102732|oas:101117205|oas:101115445|oas:101106932|oas:641303|	101102732|101117205|101115445|101106932|641303|	http://www.genome.jp/kegg-bin/show_pathway?oas04810/oas:641303%09red/oas:101117205%09red/oas:101115445%09red/oas:101102732%09red/oas:101106932%09red
Type II diabetes mellitus	KEGG PATHWAY	oas04930	2	45	0.0785875	0.482047	443205|101102503	oas:443205|oas:101102503|	443205|101102503|	http://www.genome.jp/kegg-bin/show_pathway?oas04930/oas:101102503%09red/oas:443205%09red
Pancreatic secretion	KEGG PATHWAY	oas04972	3	100	0.0821699	0.482047	101113341|101105242|443347	oas:101113341|oas:101105242|oas:443347|	101113341|101105242|443347|	http://www.genome.jp/kegg-bin/show_pathway?oas04972/oas:443347%09red/oas:101105242%09red/oas:101113341%09red
Amino sugar and nucleotide sugar metabolism	KEGG PATHWAY	oas00520	2	48	0.0873876	0.482047	101116643|101101931	oas:101116643|oas:101101931|	101116643|101101931|	http://www.genome.jp/kegg-bin/show_pathway?oas00520/oas:101116643%09red/oas:101101931%09red
Fatty acid metabolism	KEGG PATHWAY	oas01212	2	48	0.0873876	0.482047	101106744|101121475	oas:101106744|oas:101121475|	101106744|101121475|	http://www.genome.jp/kegg-bin/show_pathway?oas01212/oas:101106744%09red/oas:101121475%09red
Starch and sucrose metabolism	KEGG PATHWAY	oas00500	2	49	0.0903838	0.482047	101102774|101122795	oas:101102774|oas:101122795|	101102774|101122795|	http://www.genome.jp/kegg-bin/show_pathway?oas00500/oas:101102774%09red/oas:101122795%09red
Endometrial cancer	KEGG PATHWAY	oas05213	2	52	0.0995486	0.509689	101102732|101117211	oas:101102732|oas:101117211|	101102732|101117211|	http://www.genome.jp/kegg-bin/show_pathway?oas05213/oas:101102732%09red/oas:101117211%09red
Calcium signaling pathway	KEGG PATHWAY	oas04020	4	186	0.119575	0.520033	101110353|101122126|101120515|101102503	oas:101110353|oas:101122126|oas:101120515|oas:101102503|	101110353|101122126|101120515|101102503|	http://www.genome.jp/kegg-bin/show_pathway?oas04020/oas:101110353%09red/oas:101120515%09red/oas:101122126%09red/oas:101102503%09red
Riboflavin metabolism	KEGG PATHWAY	oas00740	1	12	0.121059	0.520033	101122795	oas:101122795|	101122795|	http://www.genome.jp/kegg-bin/show_pathway?oas00740/oas:101122795%09red
Glycerolipid metabolism	KEGG PATHWAY	oas00561	2	59	0.121852	0.520033	101116033|101108320	oas:101116033|oas:101108320|	101116033|101108320|	http://www.genome.jp/kegg-bin/show_pathway?oas00561/oas:101116033%09red/oas:101108320%09red
Inositol phosphate metabolism	KEGG PATHWAY	oas00562	2	61	0.128432	0.520033	101122126|101120515	oas:101122126|oas:101120515|	101122126|101120515|	http://www.genome.jp/kegg-bin/show_pathway?oas00562/oas:101120515%09red/oas:101122126%09red
Neurotrophin signaling pathway	KEGG PATHWAY	oas04722	3	123	0.128959	0.520033	101102732|101122126|101117211	oas:101102732|oas:101122126|oas:101117211|	101102732|101122126|101117211|	http://www.genome.jp/kegg-bin/show_pathway?oas04722/oas:101102732%09red/oas:101122126%09red/oas:101117211%09red
Fatty acid biosynthesis	KEGG PATHWAY	oas00061	1	13	0.129742	0.520033	101121475	oas:101121475|	101121475|	http://www.genome.jp/kegg-bin/show_pathway?oas00061/oas:101121475%09red
Glioma	KEGG PATHWAY	oas05214	2	63	0.135093	0.520033	101102732|101122126	oas:101102732|oas:101122126|	101102732|101122126|	http://www.genome.jp/kegg-bin/show_pathway?oas05214/oas:101102732%09red/oas:101122126%09red
Osteoclast differentiation	KEGG PATHWAY	oas04380	3	127	0.137897	0.520033	443513|101122126|101105725	oas:443513|oas:101122126|oas:101105725|	443513|101122126|101105725|	http://www.genome.jp/kegg-bin/show_pathway?oas04380/oas:101105725%09red/oas:443513%09red/oas:101122126%09red
mTOR signaling pathway	KEGG PATHWAY	oas04150	2	66	0.145225	0.520033	100127210|101117211	oas:100127210|oas:101117211|	100127210|101117211|	http://www.genome.jp/kegg-bin/show_pathway?oas04150/oas:100127210%09red/oas:101117211%09red
Glycosaminoglycan biosynthesis - keratan sulfate	KEGG PATHWAY	oas00533	1	15	0.146854	0.520033	101111372	oas:101111372|	101111372|	http://www.genome.jp/kegg-bin/show_pathway?oas00533/oas:101111372%09red
Platelet activation	KEGG PATHWAY	oas04611	3	134	0.154022	0.520033	101122126|101105725|641303	oas:101122126|oas:101105725|oas:641303|	101122126|101105725|641303|	http://www.genome.jp/kegg-bin/show_pathway?oas04611/oas:641303%09red/oas:101105725%09red/oas:101122126%09red
Glycosphingolipid biosynthesis - ganglio series	KEGG PATHWAY	oas00604	1	16	0.155284	0.520033	101112105	oas:101112105|	101112105|	http://www.genome.jp/kegg-bin/show_pathway?oas00604/oas:101112105%09red
Arrhythmogenic right ventricular cardiomyopathy (ARVC)	KEGG PATHWAY	oas05412	2	70	0.158967	0.520033	101117907|101115445	oas:101117907|oas:101115445|	101117907|101115445|	http://www.genome.jp/kegg-bin/show_pathway?oas05412/oas:101117907%09red/oas:101115445%09red
Gastric acid secretion	KEGG PATHWAY	oas04971	2	72	0.165926	0.520033	101113341|443347	oas:101113341|oas:443347|	101113341|443347|	http://www.genome.jp/kegg-bin/show_pathway?oas04971/oas:443347%09red/oas:101113341%09red
Proteoglycans in cancer	KEGG PATHWAY	oas05205	4	214	0.169871	0.520033	101102732|101122126|101117211|641303	oas:101102732|oas:101122126|oas:101117211|oas:641303|	101102732|101122126|101117211|641303|	http://www.genome.jp/kegg-bin/show_pathway?oas05205/oas:641303%09red/oas:101102732%09red/oas:101122126%09red/oas:101117211%09red
Pantothenate and CoA biosynthesis	KEGG PATHWAY	oas00770	1	18	0.171895	0.520033	101122795	oas:101122795|	101122795|	http://www.genome.jp/kegg-bin/show_pathway?oas00770/oas:101122795%09red
Bacterial invasion of epithelial cells	KEGG PATHWAY	oas05100	2	80	0.194237	0.520033	101117205|101106932	oas:101117205|oas:101106932|	101117205|101106932|	http://www.genome.jp/kegg-bin/show_pathway?oas05100/oas:101117205%09red/oas:101106932%09red
Maturity onset diabetes of the young	KEGG PATHWAY	oas04950	1	21	0.196204	0.520033	443205	oas:443205|	443205|	http://www.genome.jp/kegg-bin/show_pathway?oas04950/oas:443205%09red
Prolactin signaling pathway	KEGG PATHWAY	oas04917	2	82	0.201411	0.520033	443205|101102732	oas:443205|oas:101102732|	443205|101102732|	http://www.genome.jp/kegg-bin/show_pathway?oas04917/oas:101102732%09red/oas:443205%09red
Proximal tubule bicarbonate reclamation	KEGG PATHWAY	oas04964	1	22	0.204148	0.520033	101113341	oas:101113341|	101113341|	http://www.genome.jp/kegg-bin/show_pathway?oas04964/oas:101113341%09red
Vitamin digestion and absorption	KEGG PATHWAY	oas04977	1	22	0.204148	0.520033	101121723	oas:101121723|	101121723|	http://www.genome.jp/kegg-bin/show_pathway?oas04977/oas:101121723%09red
Dilated cardiomyopathy	KEGG PATHWAY	oas05414	2	83	0.20501	0.520033	101117907|101115445	oas:101117907|oas:101115445|	101117907|101115445|	http://www.genome.jp/kegg-bin/show_pathway?oas05414/oas:101117907%09red/oas:101115445%09red
Oxytocin signaling pathway	KEGG PATHWAY	oas04921	3	157	0.210567	0.520033	100127210|101117907|641303	oas:100127210|oas:101117907|oas:641303|	100127210|101117907|641303|	http://www.genome.jp/kegg-bin/show_pathway?oas04921/oas:100127210%09red/oas:641303%09red/oas:101117907%09red
Biosynthesis of unsaturated fatty acids	KEGG PATHWAY	oas01040	1	23	0.212014	0.520033	101106744	oas:101106744|	101106744|	http://www.genome.jp/kegg-bin/show_pathway?oas01040/oas:101106744%09red
ErbB signaling pathway	KEGG PATHWAY	oas04012	2	87	0.219471	0.520033	101102732|101122126	oas:101102732|oas:101122126|	101102732|101122126|	http://www.genome.jp/kegg-bin/show_pathway?oas04012/oas:101102732%09red/oas:101122126%09red
Prostate cancer	KEGG PATHWAY	oas05215	2	87	0.219471	0.520033	101102732|101117211	oas:101102732|oas:101117211|	101102732|101117211|	http://www.genome.jp/kegg-bin/show_pathway?oas05215/oas:101102732%09red/oas:101117211%09red
Fc gamma R-mediated phagocytosis	KEGG PATHWAY	oas04666	2	87	0.219471	0.520033	101122126|101106932	oas:101122126|oas:101106932|	101122126|101106932|	http://www.genome.jp/kegg-bin/show_pathway?oas04666/oas:101122126%09red/oas:101106932%09red
Glycosaminoglycan biosynthesis - heparan sulfate / heparin	KEGG PATHWAY	oas00534	1	24	0.219803	0.520033	101112819	oas:101112819|	101112819|	http://www.genome.jp/kegg-bin/show_pathway?oas00534/oas:101112819%09red
NF-kappa B signaling pathway	KEGG PATHWAY	oas04064	2	89	0.226734	0.520033	101122126|101105725	oas:101122126|oas:101105725|	101122126|101105725|	http://www.genome.jp/kegg-bin/show_pathway?oas04064/oas:101105725%09red/oas:101122126%09red
Nicotinate and nicotinamide metabolism	KEGG PATHWAY	oas00760	1	25	0.227514	0.520033	101122795	oas:101122795|	101122795|	http://www.genome.jp/kegg-bin/show_pathway?oas00760/oas:101122795%09red
Dorso-ventral axis formation	KEGG PATHWAY	oas04320	1	25	0.227514	0.520033	101102732	oas:101102732|	101102732|	http://www.genome.jp/kegg-bin/show_pathway?oas04320/oas:101102732%09red
Collecting duct acid secretion	KEGG PATHWAY	oas04966	1	27	0.242711	0.531547	101113341	oas:101113341|	101113341|	http://www.genome.jp/kegg-bin/show_pathway?oas04966/oas:101113341%09red
Glyoxylate and dicarboxylate metabolism	KEGG PATHWAY	oas00630	1	27	0.242711	0.531547	100307035	oas:100307035|	100307035|	http://www.genome.jp/kegg-bin/show_pathway?oas00630/oas:100307035%09red
Propanoate metabolism	KEGG PATHWAY	oas00640	1	28	0.250197	0.531547	101103801	oas:101103801|	101103801|	http://www.genome.jp/kegg-bin/show_pathway?oas00640/oas:101103801%09red
Fructose and mannose metabolism	KEGG PATHWAY	oas00051	1	30	0.264949	0.531547	101101931	oas:101101931|	101101931|	http://www.genome.jp/kegg-bin/show_pathway?oas00051/oas:101101931%09red
Inflammatory mediator regulation of TRP channels	KEGG PATHWAY	oas04750	2	100	0.266896	0.531547	101122126|101122283	oas:101122126|oas:443013|	101122126|443013|	http://www.genome.jp/kegg-bin/show_pathway?oas04750/oas:443013%09red/oas:101122126%09red
Glycerophospholipid metabolism	KEGG PATHWAY	oas00564	2	101	0.270554	0.531547	101116033|101108320	oas:101116033|oas:101108320|	101116033|101108320|	http://www.genome.jp/kegg-bin/show_pathway?oas00564/oas:101116033%09red/oas:101108320%09red
Other types of O-glycan biosynthesis	KEGG PATHWAY	oas00514	1	31	0.272216	0.531547	101108300	oas:101108300|	101108300|	http://www.genome.jp/kegg-bin/show_pathway?oas00514/oas:101108300%09red
Thyroid cancer	KEGG PATHWAY	oas05216	1	31	0.272216	0.531547	443513	oas:443513|	443513|	http://www.genome.jp/kegg-bin/show_pathway?oas05216/oas:443513%09red
Regulation of autophagy	KEGG PATHWAY	oas04140	1	32	0.279412	0.531547	100127210	oas:100127210|	100127210|	http://www.genome.jp/kegg-bin/show_pathway?oas04140/oas:100127210%09red
Circadian rhythm	KEGG PATHWAY	oas04710	1	32	0.279412	0.531547	100127210	oas:100127210|	100127210|	http://www.genome.jp/kegg-bin/show_pathway?oas04710/oas:100127210%09red
Galactose metabolism	KEGG PATHWAY	oas00052	1	32	0.279412	0.531547	101102774	oas:101102774|	101102774|	http://www.genome.jp/kegg-bin/show_pathway?oas00052/oas:101102774%09red
Natural killer cell mediated cytotoxicity	KEGG PATHWAY	oas04650	2	105	0.285178	0.531547	101102732|101122126	oas:101102732|oas:101122126|	101102732|101122126|	http://www.genome.jp/kegg-bin/show_pathway?oas04650/oas:101102732%09red/oas:101122126%09red
Primary immunodeficiency	KEGG PATHWAY	oas05340	1	33	0.286537	0.531547	101105725	oas:101105725|	101105725|	http://www.genome.jp/kegg-bin/show_pathway?oas05340/oas:101105725%09red
T cell receptor signaling pathway	KEGG PATHWAY	oas04660	2	108	0.296128	0.54149	101102732|101117211	oas:101102732|oas:101117211|	101102732|101117211|	http://www.genome.jp/kegg-bin/show_pathway?oas04660/oas:101102732%09red/oas:101117211%09red
Aldosterone-regulated sodium reabsorption	KEGG PATHWAY	oas04960	1	39	0.327836	0.590943	101117211	oas:101117211|	101117211|	http://www.genome.jp/kegg-bin/show_pathway?oas04960/oas:101117211%09red
Thyroid hormone signaling pathway	KEGG PATHWAY	oas04919	2	118	0.332405	0.590943	101122126|101117211	oas:101122126|oas:101117211|	101122126|101117211|	http://www.genome.jp/kegg-bin/show_pathway?oas04919/oas:101122126%09red/oas:101117211%09red
Huntington's disease	KEGG PATHWAY	oas05016	3	208	0.346109	0.606876	443513|443270|101110593	oas:443513|oas:443270|oas:101110593|	443513|443270|101110593|	http://www.genome.jp/kegg-bin/show_pathway?oas05016/oas:101110593%09red/oas:443513%09red/oas:443270%09red
Fatty acid degradation	KEGG PATHWAY	oas00071	1	43	0.354037	0.612389	101121475	oas:101121475|	101121475|	http://www.genome.jp/kegg-bin/show_pathway?oas00071/oas:101121475%09red
Tryptophan metabolism	KEGG PATHWAY	oas00380	1	44	0.360427	0.615129	100307035	oas:100307035|	100307035|	http://www.genome.jp/kegg-bin/show_pathway?oas00380/oas:100307035%09red
cAMP signaling pathway	KEGG PATHWAY	oas04024	3	216	0.367613	0.619137	101122283|641303|443347	oas:443013|oas:641303|oas:443347|	443013|641303|443347|	http://www.genome.jp/kegg-bin/show_pathway?oas04024/oas:443347%09red/oas:641303%09red/oas:443013%09red
Sphingolipid metabolism	KEGG PATHWAY	oas00600	1	47	0.379221	0.627247	101121732	oas:101121732|	101121732|	http://www.genome.jp/kegg-bin/show_pathway?oas00600/oas:101121732%09red
Hepatitis C	KEGG PATHWAY	oas05160	2	132	0.382229	0.627247	101102732|101117211	oas:101102732|oas:101117211|	101102732|101117211|	http://www.genome.jp/kegg-bin/show_pathway?oas05160/oas:101102732%09red/oas:101117211%09red
ABC transporters	KEGG PATHWAY	oas02010	1	55	0.426693	0.69135	443347	oas:443347|	443347|	http://www.genome.jp/kegg-bin/show_pathway?oas02010/oas:443347%09red
Amyotrophic lateral sclerosis (ALS)	KEGG PATHWAY	oas05014	1	58	0.443547	0.700914	100307035	oas:100307035|	100307035|	http://www.genome.jp/kegg-bin/show_pathway?oas05014/oas:100307035%09red
Acute myeloid leukemia	KEGG PATHWAY	oas05221	1	58	0.443547	0.700914	101102732	oas:101102732|	101102732|	http://www.genome.jp/kegg-bin/show_pathway?oas05221/oas:101102732%09red
VEGF signaling pathway	KEGG PATHWAY	oas04370	1	61	0.459908	0.709336	101122126	oas:101122126|	101122126|	http://www.genome.jp/kegg-bin/show_pathway?oas04370/oas:101122126%09red
Metabolism of xenobiotics by cytochrome P450	KEGG PATHWAY	oas00980	1	62	0.465254	0.709336	101119842	oas:101119842|	101119842|	http://www.genome.jp/kegg-bin/show_pathway?oas00980/oas:101119842%09red
MAPK signaling pathway	KEGG PATHWAY	oas04010	3	255	0.469743	0.709336	101102732|101117907|101102503	oas:101102732|oas:101117907|oas:101102503|	101102732|101117907|101102503|	http://www.genome.jp/kegg-bin/show_pathway?oas04010/oas:101117907%09red/oas:101102732%09red/oas:101102503%09red
Arginine and proline metabolism	KEGG PATHWAY	oas00330	1	64	0.475789	0.709336	101107584	oas:101107584|	101107584|	http://www.genome.jp/kegg-bin/show_pathway?oas00330/oas:101107584%09red
PI3K-Akt signaling pathway	KEGG PATHWAY	oas04151	4	356	0.476585	0.709336	101102732|100127210|101115445|101117211	oas:101102732|oas:100127210|oas:101115445|oas:101117211|	101102732|100127210|101115445|101117211|	http://www.genome.jp/kegg-bin/show_pathway?oas04151/oas:100127210%09red/oas:101102732%09red/oas:101115445%09red/oas:101117211%09red
Synaptic vesicle cycle	KEGG PATHWAY	oas04721	1	67	0.491205	0.721793	101123470	oas:101123470|	101123470|	http://www.genome.jp/kegg-bin/show_pathway?oas04721/oas:101123470%09red
Renal cell carcinoma	KEGG PATHWAY	oas05211	1	68	0.496243	0.721793	101102732	oas:101102732|	101102732|	http://www.genome.jp/kegg-bin/show_pathway?oas05211/oas:101102732%09red
Transcriptional misregulation in cancer	KEGG PATHWAY	oas05202	2	168	0.501871	0.721793	443513|101111372	oas:443513|oas:101111372|	443513|101111372|	http://www.genome.jp/kegg-bin/show_pathway?oas05202/oas:101111372%09red/oas:443513%09red
Chemical carcinogenesis	KEGG PATHWAY	oas05204	1	73	0.520697	0.721898	101119842	oas:101119842|	101119842|	http://www.genome.jp/kegg-bin/show_pathway?oas05204/oas:101119842%09red
Complement and coagulation cascades	KEGG PATHWAY	oas04610	1	73	0.520697	0.721898	101119740	oas:101119740|	101119740|	http://www.genome.jp/kegg-bin/show_pathway?oas04610/oas:101119740%09red
Adherens junction	KEGG PATHWAY	oas04520	1	73	0.520697	0.721898	101106932	oas:101106932|	101106932|	http://www.genome.jp/kegg-bin/show_pathway?oas04520/oas:101106932%09red
Chronic myeloid leukemia	KEGG PATHWAY	oas05220	1	75	0.530144	0.721898	101102732	oas:101102732|	101102732|	http://www.genome.jp/kegg-bin/show_pathway?oas05220/oas:101102732%09red
Biosynthesis of amino acids	KEGG PATHWAY	oas01230	1	75	0.530144	0.721898	101107584	oas:101107584|	101107584|	http://www.genome.jp/kegg-bin/show_pathway?oas01230/oas:101107584%09red
Pertussis	KEGG PATHWAY	oas05133	1	77	0.539405	0.725673	101119740	oas:101119740|	101119740|	http://www.genome.jp/kegg-bin/show_pathway?oas05133/oas:101119740%09red
Chemokine signaling pathway	KEGG PATHWAY	oas04062	2	182	0.544255	0.725673	101102732|101106932	oas:101102732|oas:101106932|	101102732|101106932|	http://www.genome.jp/kegg-bin/show_pathway?oas04062/oas:101102732%09red/oas:101106932%09red
MicroRNAs in cancer	KEGG PATHWAY	oas05206	2	184	0.550102	0.725908	101102732|101122126	oas:101102732|oas:101122126|	101102732|101122126|	http://www.genome.jp/kegg-bin/show_pathway?oas05206/oas:101102732%09red/oas:101122126%09red
Cardiac muscle contraction	KEGG PATHWAY	oas04260	1	84	0.570412	0.732712	101117907	oas:101117907|	101117907|	http://www.genome.jp/kegg-bin/show_pathway?oas04260/oas:101117907%09red
Insulin secretion	KEGG PATHWAY	oas04911	1	86	0.578883	0.732712	443205	oas:443205|	443205|	http://www.genome.jp/kegg-bin/show_pathway?oas04911/oas:443205%09red
GnRH signaling pathway	KEGG PATHWAY	oas04912	1	87	0.583055	0.732712	101102732	oas:101102732|	101102732|	http://www.genome.jp/kegg-bin/show_pathway?oas04912/oas:101102732%09red
ECM-receptor interaction	KEGG PATHWAY	oas04512	1	89	0.591278	0.732712	101115445	oas:101115445|	101115445|	http://www.genome.jp/kegg-bin/show_pathway?oas04512/oas:101115445%09red
Gap junction	KEGG PATHWAY	oas04540	1	89	0.591278	0.732712	101102732	oas:101102732|	101102732|	http://www.genome.jp/kegg-bin/show_pathway?oas04540/oas:101102732%09red
Salivary secretion	KEGG PATHWAY	oas04970	1	90	0.595328	0.732712	101105242	oas:101105242|	101105242|	http://www.genome.jp/kegg-bin/show_pathway?oas04970/oas:101105242%09red
Salmonella infection	KEGG PATHWAY	oas05132	1	90	0.595328	0.732712	101106932	oas:101106932|	101106932|	http://www.genome.jp/kegg-bin/show_pathway?oas05132/oas:101106932%09red
Estrogen signaling pathway	KEGG PATHWAY	oas04915	1	102	0.640925	0.78106	101102732	oas:101102732|	101102732|	http://www.genome.jp/kegg-bin/show_pathway?oas04915/oas:101102732%09red
Retrograde endocannabinoid signaling	KEGG PATHWAY	oas04723	1	104	0.648011	0.78106	101119039	oas:101119039|	101119039|	http://www.genome.jp/kegg-bin/show_pathway?oas04723/oas:101119039%09red
Pathways in cancer	KEGG PATHWAY	oas05200	3	336	0.653137	0.78106	101102732|443513|101122126	oas:101102732|oas:443513|oas:101122126|	101102732|443513|101122126|	http://www.genome.jp/kegg-bin/show_pathway?oas05200/oas:101102732%09red/oas:443513%09red/oas:101122126%09red
HIF-1 signaling pathway	KEGG PATHWAY	oas04066	1	109	0.665121	0.78106	101122126	oas:101122126|	101122126|	http://www.genome.jp/kegg-bin/show_pathway?oas04066/oas:101122126%09red
Carbon metabolism	KEGG PATHWAY	oas01200	1	109	0.665121	0.78106	101107584	oas:101107584|	101107584|	http://www.genome.jp/kegg-bin/show_pathway?oas01200/oas:101107584%09red
Ras signaling pathway	KEGG PATHWAY	oas04014	2	233	0.676754	0.787495	101102732|101122126	oas:101102732|oas:101122126|	101102732|101122126|	http://www.genome.jp/kegg-bin/show_pathway?oas04014/oas:101102732%09red/oas:101122126%09red
Lysosome	KEGG PATHWAY	oas04142	1	119	0.696897	0.803629	101122348	oas:101122348|	101122348|	http://www.genome.jp/kegg-bin/show_pathway?oas04142/oas:101122348%09red
Leukocyte transendothelial migration	KEGG PATHWAY	oas04670	1	123	0.708749	0.809999	101122126	oas:101122126|	101122126|	http://www.genome.jp/kegg-bin/show_pathway?oas04670/oas:101122126%09red
Vascular smooth muscle contraction	KEGG PATHWAY	oas04270	1	126	0.717335	0.812556	641303	oas:641303|	641303|	http://www.genome.jp/kegg-bin/show_pathway?oas04270/oas:641303%09red
Toxoplasmosis	KEGG PATHWAY	oas05145	1	134	0.739016	0.829773	101117211	oas:101117211|	101117211|	http://www.genome.jp/kegg-bin/show_pathway?oas05145/oas:101117211%09red
Signaling pathways regulating pluripotency of stem cells	KEGG PATHWAY	oas04550	1	141	0.756625	0.842156	101110593	oas:101110593|	101110593|	http://www.genome.jp/kegg-bin/show_pathway?oas04550/oas:101110593%09red
Spliceosome	KEGG PATHWAY	oas03040	1	151	0.779746	0.853055	101121978	oas:101121978|	101121978|	http://www.genome.jp/kegg-bin/show_pathway?oas03040/oas:101121978%09red
Adrenergic signaling in cardiomyocytes	KEGG PATHWAY	oas04261	1	151	0.779746	0.853055	101117907	oas:101117907|	101117907|	http://www.genome.jp/kegg-bin/show_pathway?oas04261/oas:101117907%09red
RNA transport	KEGG PATHWAY	oas03013	1	167	0.812274	0.863778	100137071	oas:100137071|	100137071|	http://www.genome.jp/kegg-bin/show_pathway?oas03013/oas:100137071%09red
Jak-STAT signaling pathway	KEGG PATHWAY	oas04630	1	167	0.812274	0.863778	101102732	oas:101102732|	101102732|	http://www.genome.jp/kegg-bin/show_pathway?oas04630/oas:101102732%09red
cGMP-PKG signaling pathway	KEGG PATHWAY	oas04022	1	171	0.819629	0.863778	641303	oas:641303|	641303|	http://www.genome.jp/kegg-bin/show_pathway?oas04022/oas:641303%09red
Purine metabolism	KEGG PATHWAY	oas00230	1	175	0.826697	0.863778	101122795	oas:101122795|	101122795|	http://www.genome.jp/kegg-bin/show_pathway?oas00230/oas:101122795%09red
Protein processing in endoplasmic reticulum	KEGG PATHWAY	oas04141	1	176	0.82842	0.863778	101117995	oas:101117995|	101117995|	http://www.genome.jp/kegg-bin/show_pathway?oas04141/oas:101117995%09red
Non-alcoholic fatty liver disease (NAFLD)	KEGG PATHWAY	oas04932	1	177	0.830127	0.863778	100127210	oas:100127210|	100127210|	http://www.genome.jp/kegg-bin/show_pathway?oas04932/oas:100127210%09red
Alcoholism	KEGG PATHWAY	oas05034	1	181	0.836785	0.863778	101102732	oas:101102732|	101102732|	http://www.genome.jp/kegg-bin/show_pathway?oas05034/oas:101102732%09red
Epstein-Barr virus infection	KEGG PATHWAY	oas05169	1	196	0.859518	0.880147	101122126	oas:101122126|	101122126|	http://www.genome.jp/kegg-bin/show_pathway?oas05169/oas:101122126%09red
Ribosome	KEGG PATHWAY	oas03010	1	240	0.90957	0.924008	100037666	oas:100037666|	100037666|	http://www.genome.jp/kegg-bin/show_pathway?oas03010/oas:100037666%09red
HTLV-I infection	KEGG PATHWAY	oas05166	1	275	0.936336	0.942991	101121782	oas:101121782|	101121782|	http://www.genome.jp/kegg-bin/show_pathway?oas05166/oas:101121782%09red
Neuroactive ligand-receptor interaction	KEGG PATHWAY	oas04080	1	286	0.942991	0.942991	101122283	oas:443013|	443013|	http://www.genome.jp/kegg-bin/show_pathway?oas04080/oas:443013%09red

## Sheet: miRNA_GO
GO_accession	Description	Term_type	Over_represented_pValue	Corrected_pValue	DEG_item	DEG_list	Bg_item	Bg_list	Gene_names
GO:0005488	binding	molecular_function	6.4891e-05	0.1597	1993	3149	11851	20255	101101964,101103359,101119929,101111480,101115558,101116591,101110137,101106960,101117514,101117137,101118713,101106472,101104420,101110406,101114993,101102283,100101233,101122689,101118948,101103439,101112476,101119023,101108782,101103525,100294596,101106151,101112587,101105347,101103052,101115541,101108580,101106786,101113085,101110081,101108437,100135687,101107628,101113497,101106954,101112817…
GO:0004252	serine-type endopeptidase activity	molecular_function	9.9645e-05	0.1597	67	3149	272	20255	101121793,101113741,101110356,100141296,101108034,101117443,101110590,101101912,101120216,101115707,101121197,101123297,101105316,443546,105614940,101121553,101102413,101117723,101119969,767576,101102542,443429,105601883,101117415,101122059,101113279,443433,101118814,101112250,105614286,101104587,101114258,101113508,101116639,101115705,101121714,443149,101122483,101118332,101108227,101112735,1011…
GO:0006954	inflammatory response	biological_process	0.00010865	0.1597	12	3149	24	20255	1.01121e+107
GO:0005576	extracellular region	cellular_component	0.00013546	0.1597	287	3149	1481	20255	101103725,101123668,101118172,101108367,101108679,101105963,101112991,100125354,101123672,101120899,105601924,101108788,101111247,101116015,101102779,101109888,101121788,101107127,101121195,101109602,101120468,101111507,101109063,101119226,101104506,101120456,443302,101109126,101109018,101110078,101103268,101102952,101118332,101120506,101107294,100126577,101114784,101116142,101108799,101117550,10…
GO:0050776	regulation of immune response	biological_process	0.0002943	0.23941	16	3149	42	20255	1.00127e+143
GO:0006869	lipid transport	biological_process	0.000372	0.23941	29	3149	98	20255	100820755,101105566,101121414,101117273,101109430,101116005,101112696,100125354,101117014,101120924,106992022,101107771,101105809,101107904,101107298,101102047,105604856,100125621,101109783,101121264,101105069,101106373,100294596,106991887,101110486,101118277,101114356,101113276,101118731
GO:0000149	SNARE binding	molecular_function	0.00040613	0.23941	9	3149	17	20255	1.01107e+80
GO:0019905	syntaxin binding	molecular_function	0.00040613	0.23941	9	3149	17	20255	1.01108e+80
GO:0010876	lipid localization	biological_process	0.00057159	0.28892	34	3149	123	20255	105604856,101102047,101107771,101118731,101105069,100294596,101114356,101110486,101121414,101116005,101109430,101102198,100820755,106992022,100125354,101117014,100125621,101109783,101105809,101107904,101107298,101113276,106991750,106991887,101121264,101106373,101118277,101117273,101103211,101105566,105610921,101120924,101108768,101112696
GO:0005157	macrophage colony-stimulating factor receptor binding	molecular_function	0.00064215	0.28892	5	3149	6	20255	1.01108e+44
GO:0005047	signal recognition particle binding	molecular_function	0.00067391	0.28892	6	3149	9	20255	1.01114e+53
GO:0006955	immune response	biological_process	0.00085014	0.3341	69	3149	315	20255	101102047,101110406,101116168,101108171,101104691,101122466,105604623,106990117,101106095,101122129,101110444,101115814,101120011,101114005,101120871,101119545,101120217,101114662,101102561,101113609,101105809,101104661,101108430,678679,443064,105614484,101118373,101119329,105604626,101105167,101104173,101119187,101107851,101111411,101104626,105608817,101115898,101116972,101116496,101114714,10030…
GO:0002682	regulation of immune system process	biological_process	0.0010919	0.39611	19	3149	59	20255	1.01119e+170
GO:0002526	acute inflammatory response	biological_process	0.0017568	0.41532	4	3149	5	20255	1.05604e+35
GO:0006953	acute-phase response	biological_process	0.0017568	0.41532	4	3149	5	20255	1.01121e+35
GO:0001934	positive regulation of protein phosphorylation	biological_process	0.0020292	0.41532	6	3149	10	20255	1.01108e+53
GO:0042327	positive regulation of phosphorylation	biological_process	0.0020292	0.41532	6	3149	10	20255	1.01108e+53
GO:0000052	citrulline metabolic process	biological_process	0.0021006	0.41532	5	3149	7	20255	1.05611e+41
GO:0018101	protein citrullination	biological_process	0.0021006	0.41532	5	3149	7	20255	4.43369e+41
GO:0019240	citrulline biosynthetic process	biological_process	0.0021006	0.41532	5	3149	7	20255	1.05611e+41
GO:0014065	phosphatidylinositol 3-kinase signaling	biological_process	0.0023051	0.41532	7	3149	14	20255	1.01104e+62
GO:0014066	regulation of phosphatidylinositol 3-kinase signaling	biological_process	0.0023051	0.41532	7	3149	14	20255	1.01108e+62
GO:0014068	positive regulation of phosphatidylinositol 3-kinase signaling	biological_process	0.0023051	0.41532	7	3149	14	20255	1.01115e+62
GO:0043548	phosphatidylinositol 3-kinase binding	molecular_function	0.0023051	0.41532	7	3149	14	20255	1.01106e+62
GO:0048015	phosphatidylinositol-mediated signaling	biological_process	0.0023051	0.41532	7	3149	14	20255	1.01115e+62
GO:0048017	inositol lipid-mediated signaling	biological_process	0.0023051	0.41532	7	3149	14	20255	1.01108e+62
GO:0004668	protein-arginine deiminase activity	molecular_function	0.0023778	0.41532	6	3149	10	20255	4.43369e+50
GO:0005785	signal recognition particle receptor complex	cellular_component	0.0027676	0.46614	5	3149	8	20255	1.01106e+44
GO:0005515	protein binding	molecular_function	0.0029214	0.47508	1045	3149	6032	20255	101116925,101112637,101110667,101103368,101119355,105609264,101102084,101123343,101122675,105613904,101109503,101103859,100302099,101116887,101102368,101115392,101105923,101106981,101107003,101116491,101104674,101121650,101103190,101110251,101106668,101116037,101104928,101109460,101120936,101106130,101105786,105601843,101102951,101117334,101104709,101123281,101106877,101113153,101102890,101120406…
GO:0008236	serine-type peptidase activity	molecular_function	0.0032642	0.49611	75	3149	347	20255	101119969,767576,101102542,443429,105601883,101117415,101113279,101122059,101118814,443433,105614286,101112250,101104587,101114258,101113508,101115705,101116639,101115179,101121793,101113741,101104407,101110356,100141296,101108034,101117443,101110590,101104153,101101912,101115707,101120216,101113589,101123297,101121197,101105316,105614940,443546,101121553,101117723,101102413,101118624,101114312,1…
GO:0017171	serine hydrolase activity	molecular_function	0.0032642	0.49611	75	3149	347	20255	101115705,101116639,101113508,101114258,101104587,105614286,101112250,101118814,443433,101113279,101122059,101117415,105601883,767576,101102542,443429,101119969,101102413,101117723,101121553,105614940,443546,101105316,101123297,101121197,101115707,101120216,101113589,101110590,101101912,101104153,101117443,101108034,100141296,101110356,101113741,101104407,101121793,101115179,100145862,101102553,4…
GO:0007259	JAK-STAT cascade	biological_process	0.0033663	0.49611	4	3149	6	20255	1.05602e+35
GO:0005791	rough endoplasmic reticulum	cellular_component	0.0038018	0.52587	8	3149	18	20255	1.01118e+71
GO:0030867	rough endoplasmic reticulum membrane	cellular_component	0.0038018	0.52587	8	3149	18	20255	1.01104e+71
GO:0043021	ribonucleoprotein complex binding	molecular_function	0.0039028	0.52587	7	3149	15	20255	1.01107e+62
GO:0005125	cytokine activity	molecular_function	0.0053022	0.69459	21	3149	80	20255	1.01122e+185
GO:0003956	NAD(P)+-protein-arginine ADP-ribosyltransferase activity	molecular_function	0.0060281	0.76833	5	3149	9	20255	1.01118e+44
GO:0005102	receptor binding	molecular_function	0.0077939	0.94565	144	3149	758	20255	101112704,101114714,101116499,101110252,101105341,101110694,101121173,101103389,101119957,101109430,101102747,101120651,103611088,105607318,101122038,101102084,101104740,101118277,105613815,100141303,101115323,100270713,101109910,101104186,101113261,101109471,101116491,101111010,100101238,101111035,101108489,101114953,101107544,101104540,101112429,101102047,101113427,101105267,443473,100302340,10…
GO:0002376	immune system process	biological_process	0.0079057	0.94565	72	3149	358	20255	101102699,103611088,101120899,101119957,101123437,101107995,101105341,100305130,101114714,101116496,105602068,101112704,105601913,101114931,101122801,101111739,101106288,443396,101107544,101111035,101108489,101114535,101118299,101110078,100101238,106992020,101116105,101111174,101104506,101120468,101107931,101119856,100127211,101114005,101120011,101119545,101120871,101116168,101108171,101104691,10…
GO:0003993	acid phosphatase activity	molecular_function	0.0080208	0.94565	31	3149	118	20255	101113097,101113510,101118933,101112817,101113642,101106954,101104734,497272,101102951,101109808,101102872,105606101,101120758,100820736,101108816,101114897,101118337,101112800,101107655,101119583,101118070,101120569,101114662,101117435,101118423,101108913,101110626,101120130,101110575,101117943,101108181
GO:0018195	peptidyl-arginine modification	biological_process	0.0087608	0.99384	5	3149	9	20255	1.01108e+41
GO:0003684	damaged DNA binding	molecular_function	0.009063	0.99384	10	3149	27	20255	1.01103e+89
GO:0007131	reciprocal meiotic recombination	biological_process	0.0092725	0.99384	7	3149	16	20255	1.01106e+62
GO:0035825	reciprocal DNA recombination	biological_process	0.0092725	0.99384	7	3149	16	20255	1.01107e+62
GO:0004869	cysteine-type endopeptidase inhibitor activity	molecular_function	0.0095323	0.99899	8	3149	22	20255	4.43312e+62
GO:0009073	aromatic amino acid family biosynthetic process	biological_process	0.009907	1	5	3149	10	20255	1.01112e+44
GO:0006914	autophagy	biological_process	0.010562	1	57	3149	259	20255	101109449,101104081,101120777,101120338,101122588,101110219,101111507,101109602,101105836,101101937,101108969,101111580,101114502,101122784,101116359,101106774,101106719,101120440,101102584,101108359,101104153,105612424,101108814,101116107,101109165,101116087,101111791,101111010,101123650,101107783,101103925,100913169,101105772,105605902,101116872,101118731,101111605,101114931,101112429,101113585…
GO:0005199	structural constituent of cell wall	molecular_function	0.011186	1	4	3149	7	20255	1.01106e+35
GO:0007127	meiosis I	biological_process	0.011934	1	9	3149	24	20255	1.01109e+80
GO:0016813	hydrolase activity, acting on carbon-nitrogen (but not peptide) bonds, in linear amidines	molecular_function	0.012972	1	6	3149	13	20255	1.05611e+50
GO:0072509	divalent inorganic cation transmembrane transporter activity	molecular_function	0.014121	1	38	3149	166	20255	101114005,101110363,101108392,101123290,497272,101103562,101109534,101117397,101101873,101121046,101108864,101108370,101110406,101104154,101110004,780477,101121677,101113317,101102362,101108770,101117755,101108142,101112608,101112591,101112132,101116998,101113997,101122960,101120286,101118911,100302077,101116194,101102185,101104978,101122859,101102337,101122169,101115484
GO:0004347	glucose-6-phosphate isomerase activity	molecular_function	0.016316	1	4	3149	7	20255	1.01117e+35
GO:0006468	protein phosphorylation	biological_process	0.016606	1	122	3149	615	20255	101103793,101108403,101106773,443453,101109779,101109232,101113850,101108239,101115819,101121386,101104446,101118257,101111612,101109276,101118124,101114472,101120826,101114815,101122783,101107882,101118996,101108969,101114662,780507,101120665,101118799,101115680,101108956,101122959,101110121,101115612,101123008,101107205,101123415,101110124,101111852,101109630,101109789,101106688,101111480,10111…
GO:0006213	pyrimidine nucleoside metabolic process	biological_process	0.016934	1	6	3149	14	20255	1.01115e+53
GO:0005158	insulin receptor binding	molecular_function	0.017879	1	7	3149	18	20255	1.01121e+62
GO:0016763	transferase activity, transferring pentosyl groups	molecular_function	0.021424	1	21	3149	83	20255	1.01112e+188
GO:0015085	calcium ion transmembrane transporter activity	molecular_function	0.021593	1	15	3149	55	20255	1.0111e+131
GO:0030695	GTPase regulator activity	molecular_function	0.021738	1	23	3149	93	20255	1.01122e+203
GO:0005539	glycosaminoglycan binding	molecular_function	0.023282	1	12	3149	39	20255	1.01109e+107
GO:0000502	proteasome complex	cellular_component	0.024173	1	14	3149	54	20255	1.01113e+125
GO:0006821	chloride transport	biological_process	0.024922	1	6	3149	15	20255	1.01111e+53
GO:0005770	late endosome	cellular_component	0.025548	1	4	3149	8	20255	1.01121e+32
GO:0031902	late endosome membrane	cellular_component	0.025548	1	4	3149	8	20255	1.01111e+32
GO:0043154	negative regulation of cysteine-type endopeptidase activity involved in apoptotic process	biological_process	0.025548	1	4	3149	8	20255	4.43087e+32
GO:0045121	membrane raft	cellular_component	0.025548	1	4	3149	8	20255	1.01111e+32
GO:0071986	Ragulator complex	cellular_component	0.025548	1	4	3149	8	20255	1.01121e+32
GO:2000117	negative regulation of cysteine-type endopeptidase activity	biological_process	0.025548	1	4	3149	8	20255	1.01111e+32
GO:0070588	calcium ion transmembrane transport	biological_process	0.025876	1	5	3149	11	20255	1.01113e+44
GO:1901681	sulfur compound binding	molecular_function	0.026313	1	19	3149	74	20255	1.01112e+170
GO:0052547	regulation of peptidase activity	biological_process	0.026704	1	10	3149	32	20255	1.01122e+86
GO:0052548	regulation of endopeptidase activity	biological_process	0.026704	1	10	3149	32	20255	1.01115e+86
GO:0004107	chorismate synthase activity	molecular_function	0.026801	1	2	3149	2	20255	1.05616e+17
GO:0009292	genetic transfer	biological_process	0.02727	1	2	3149	2	20255	1.01113e+17
GO:0019318	hexose metabolic process	biological_process	0.027708	1	18	3149	73	20255	1.01121e+158
GO:0032270	positive regulation of cellular protein metabolic process	biological_process	0.028195	1	10	3149	32	20255	1.01116e+89
GO:0051247	positive regulation of protein metabolic process	biological_process	0.028195	1	10	3149	32	20255	1.0111e+89
GO:0016627	oxidoreductase activity, acting on the CH-CH group of donors	molecular_function	0.028229	1	24	3149	98	20255	1.01117e+212
GO:0008284	positive regulation of cell proliferation	biological_process	0.029464	1	10	3149	33	20255	1.01108e+89
GO:0042578	phosphoric ester hydrolase activity	molecular_function	0.029615	1	82	3149	406	20255	101109677,101122905,101107655,101114662,101120130,101117831,101110367,101112817,101111598,105604626,101106954,105606101,101102872,101109808,101118942,101118337,101108572,101108142,101114897,101102034,101112411,101118326,101108913,101104393,101117943,101110575,101113178,101117004,101113510,106991439,101121131,101117580,101113097,101119587,101113245,101118488,497272,101104734,101114721,101105855,10…
GO:0000172	ribonuclease MRP complex	cellular_component	0.029663	1	2	3149	2	20255	641296101106353
GO:0006379	mRNA cleavage	biological_process	0.029663	1	2	3149	2	20255	101106353641296
GO:0030677	ribonuclease P complex	cellular_component	0.029663	1	2	3149	2	20255	641296101106353
GO:0090501	RNA phosphodiester bond hydrolysis	biological_process	0.029663	1	2	3149	2	20255	101106353641296
GO:1902555	endoribonuclease complex	cellular_component	0.029663	1	2	3149	2	20255	101106353641296
GO:0010466	negative regulation of peptidase activity	biological_process	0.029829	1	7	3149	20	20255	1.01111e+59
GO:0010951	negative regulation of endopeptidase activity	biological_process	0.029829	1	7	3149	20	20255	1.01115e+59
GO:0042555	MCM complex	cellular_component	0.029878	1	2	3149	2	20255	1.0112e+17
GO:0019008	molybdopterin synthase complex	cellular_component	0.029878	1	2	3149	2	20255	1.01115e+17
GO:0001726	ruffle	cellular_component	0.029878	1	2	3149	2	20255	1.01113e+17
GO:0004788	thiamine diphosphokinase activity	molecular_function	0.029878	1	2	3149	2	20255	1.0112e+17
GO:0031252	cell leading edge	cellular_component	0.029878	1	2	3149	2	20255	1.01115e+17
GO:0072593	reactive oxygen species metabolic process	biological_process	0.031037	1	5	3149	12	20255	4.43077e+38
GO:0008443	phosphofructokinase activity	molecular_function	0.031433	1	9	3149	30	20255	1.01111e+74
GO:0019825	oxygen binding	molecular_function	0.032502	1	6	3149	19	20255	1.01109e+53
GO:0030178	negative regulation of Wnt signaling pathway	biological_process	0.033019	1	5	3149	12	20255	1.01112e+44
GO:0043281	regulation of cysteine-type endopeptidase activity involved in apoptotic process	biological_process	0.034715	1	7	3149	20	20255	1.01122e+59
GO:2000116	regulation of cysteine-type endopeptidase activity	biological_process	0.034715	1	7	3149	20	20255	1.01111e+59
GO:0019200	carbohydrate kinase activity	molecular_function	0.034726	1	10	3149	35	20255	1.01108e+83
GO:0004175	endopeptidase activity	molecular_function	0.035494	1	143	3149	771	20255	101121197,101102413,101108055,101116166,101112192,443546,105614940,101110953,101110439,101110306,443348,101117450,101121793,101119187,101108923,101106565,101115707,101120216,101110590,101101912,101109808,101117443,101108034,101116998,101110970,101114258,101113508,101112199,101106633,767576,101102542,443429,101122952,101113323,101119969,101120574,105614286,101112250,101118814,101110950,101122059,1…
GO:0010562	positive regulation of phosphorus metabolic process	biological_process	0.03662	1	6	3149	16	20255	1.01108e+53
GO:0031401	positive regulation of protein modification process	biological_process	0.03662	1	6	3149	16	20255	1.0111e+53
GO:0045937	positive regulation of phosphate metabolic process	biological_process	0.03662	1	6	3149	16	20255	1.01123e+53
GO:0005262	calcium channel activity	molecular_function	0.036772	1	13	3149	49	20255	1.01113e+113
GO:0005618	cell wall	cellular_component	0.037462	1	7	3149	20	20255	1.01114e+62
GO:0031514	motile cilium	cellular_component	0.039278	1	21	3149	87	20255	1.01113e+188
GO:1901505	carbohydrate derivative transporter activity	molecular_function	0.039527	1	8	3149	25	20255	1.0112e+71
GO:0042157	lipoprotein metabolic process	biological_process	0.040272	1	24	3149	107	20255	1.01102e+215
GO:0000981	RNA polymerase II transcription factor activity, sequence-specific DNA binding	molecular_function	0.040714	1	7	3149	21	20255	1.01115e+59
GO:0005669	transcription factor TFIID complex	cellular_component	0.041011	1	9	3149	37	20255	1.01102e+80
GO:0098772	molecular function regulator	molecular_function	0.04269	1	138	3149	740	20255	101123146,101104264,101104547,101109786,101104518,101116802,101114594,100217407,101110885,101105017,101115893,101110030,101119341,101111593,101101970,101111530,101105923,101110807,100125620,101108865,101107051,101119525,101110163,101106877,443415,101121671,101107150,101117532,101107661,105606875,101112932,101101937,443392,101115175,101107904,101114717,101104001,101112272,101104446,101105398,10112…
GO:0005882	intermediate filament	cellular_component	0.042721	1	39	3149	193	20255	105604734,101111271,105611408,105606097,106990811,100141297,101110490,443415,101106557,106990803,100294614,101109430,101117934,100526782,101103655,101120243,101107533,101108798,100526780,106990888,101110219,100526785,101112716,101117175,101119327,101113816,101121536,101115341,101104657,101111791,105614872,101111010,101110356,100141296,101117378,101106703,101115252,101108536,101110495
GO:0045111	intermediate filament cytoskeleton	cellular_component	0.042721	1	39	3149	193	20255	101111791,105614872,101111010,101110356,100141296,101117378,101121536,101113816,101115341,101104657,101106703,101115252,101108536,101110495,101107533,101120243,100526785,101117175,101119327,101112716,101108798,100526780,106990888,101110219,443415,106990803,101106557,100141297,101110490,100526782,101103655,100294614,101109430,101117934,105604734,105606097,106990811,101111271,105611408
GO:0005929	cilium	cellular_component	0.043268	1	22	3149	93	20255	1.05612e+197
GO:1902531	regulation of intracellular signal transduction	biological_process	0.044029	1	32	3149	142	20255	101115893,101110030,101107664,101101937,101123259,101114662,101107354,101104173,101112448,101105923,101107544,101104720,101122121,101110410,101113436,101112704,101112992,101106288,101123030,101108865,101115486,101106095,101119743,101102047,101107175,101107150,101105381,101115645,101122356,101112995,101118115,101110137
GO:0016310	phosphorylation	biological_process	0.04404	1	136	3149	721	20255	101114472,101109276,101118257,443164,101122783,101114815,443085,101108403,101121386,101115819,101108239,101113850,101113048,101109481,443454,101112413,101111271,443156,101114993,101114290,443087,101104774,101107205,101123008,101115612,101110121,101108956,101115680,101118799,101113737,101111480,101106688,101112939,101109630,101110786,101110124,101123415,101117198,101123660,101110186,101113846,1011…
GO:0003779	actin binding	molecular_function	0.044227	1	55	3149	272	20255	101122370,101111593,101112456,101119414,106991066,101112735,101115149,101110390,106990980,101123207,101104187,101122057,101123425,101118036,101102997,106991683,101116562,101104086,105607633,105603925,101119643,101115403,494432,101114707,101116925,101103676,101122038,101113343,101109503,101115336,101103274,101109088,100302340,101102925,101122937,101114982,101114674,101106132,101121634,106990985,10…
GO:0015886	heme transport	biological_process	0.044586	1	7	3149	21	20255	1.01123e+59
GO:1901678	iron coordination entity transport	biological_process	0.044586	1	7	3149	21	20255	1.01108e+59
GO:0030518	intracellular steroid hormone receptor signaling pathway	biological_process	0.044628	1	6	3149	17	20255	1.01115e+50
GO:0030522	intracellular receptor signaling pathway	biological_process	0.044628	1	6	3149	17	20255	1.01122e+50
GO:0045087	innate immune response	biological_process	0.045208	1	9	3149	30	20255	1.0111e+80
GO:0042287	MHC protein binding	molecular_function	0.045639	1	4	3149	9	20255	1.01105e+35
GO:0042289	MHC class II protein binding	molecular_function	0.045639	1	4	3149	9	20255	1.01111e+35
GO:0015662	ATPase activity, coupled to transmembrane movement of ions, phosphorylative mechanism	molecular_function	0.046324	1	6	3149	17	20255	1.01116e+53
GO:0005044	scavenger receptor activity	molecular_function	0.047942	1	16	3149	64	20255	4.43153e+134
GO:0038024	cargo receptor activity	molecular_function	0.047942	1	16	3149	64	20255	1.01112e+134
GO:0030111	regulation of Wnt signaling pathway	biological_process	0.048152	1	6	3149	17	20255	1.01117e+53
GO:0045202	synapse	cellular_component	0.048509	1	6	3149	17	20255	1.01108e+53
GO:0016838	carbon-oxygen lyase activity, acting on phosphates	molecular_function	0.04852	1	4	3149	9	20255	1.01112e+35
GO:0048583	regulation of response to stimulus	biological_process	0.049232	1	58	3149	288	20255	101105381,101107150,101105172,101115645,101122356,101114005,101106156,101110137,101118115,101112995,101112992,101112179,443005,105602068,101112704,101113436,105601913,101123030,101115486,101106095,101108865,101106288,101116168,100305130,101119743,101106120,101123376,101107175,101102047,105608817,101115898,101111598,101107354,101116105,101121702,101112448,101104173,101106603,101104720,101107544,10…
GO:0006006	glucose metabolic process	biological_process	0.049322	1	7	3149	22	20255	1.01117e+59
GO:0071949	FAD binding	molecular_function	0.049542	1	10	3149	34	20255	1.01122e+89
GO:0051336	regulation of hydrolase activity	biological_process	0.050042	1	18	3149	74	20255	1.01109e+158
GO:0006165	nucleoside diphosphate phosphorylation	biological_process	0.050053	1	11	3149	40	20255	1.01112e+89
GO:0046939	nucleotide phosphorylation	biological_process	0.050053	1	11	3149	40	20255	1.01117e+89
GO:0000154	rRNA modification	biological_process	0.050077	1	6	3149	17	20255	1.01118e+53
GO:0031167	rRNA methylation	biological_process	0.050077	1	6	3149	17	20255	1.01122e+53
GO:0060429	epithelium development	biological_process	0.050165	1	18	3149	78	20255	1.01104e+161
GO:0006897	endocytosis	biological_process	0.050354	1	6	3149	18	20255	1.01108e+53
GO:0016773	phosphotransferase activity, alcohol group as acceptor	molecular_function	0.05039	1	168	3149	910	20255	105605969,101107106,101115047,554324,101107151,101102402,101112720,101122519,443005,101111163,101123108,101117122,101105529,101105174,101103751,101119535,101113576,100885761,101107113,101122886,101112735,105604182,101123191,101113846,101110186,101109813,101113475,101123660,101105127,101120590,101123118,101110626,443489,101113841,101119510,100302302,101114748,101108956,101110121,101117304,10111879…
GO:0030173	integral component of Golgi membrane	cellular_component	0.050447	1	4	3149	9	20255	1.01112e+35
GO:0031228	intrinsic component of Golgi membrane	cellular_component	0.050447	1	4	3149	9	20255	1.06991e+35
GO:0006284	base-excision repair	biological_process	0.050688	1	5	3149	13	20255	1.01119e+44
GO:0008201	heparin binding	molecular_function	0.050774	1	6	3149	17	20255	1.00302e+53
GO:0016791	phosphatase activity	molecular_function	0.051942	1	65	3149	325	20255	101118488,101113510,101121131,106991439,101113097,105616627,105606042,101105855,101113302,101104734,497272,101118326,101112411,101102034,101114897,101118337,101108142,101113178,101117943,101110575,101108913,101104393,101111598,101112817,101117831,101118942,105606101,101102872,101109808,101106954,105604626,101107655,101109677,101122905,101120130,101114662,101102951,101112800,101109302,101105420,10…
GO:0005216	ion channel activity	molecular_function	0.052625	1	90	3149	465	20255	101116562,101111411,101105917,101120360,101121389,105603946,101114135,101118435,105604604,101116998,105606102,101112591,101116360,101119467,443488,100302624,101110253,101122859,101111476,101115663,101121535,101121868,101103020,101121330,101116428,101114065,101106615,101119497,101117004,101104736,101108864,101105267,101114005,101110429,101122747,101120711,101114721,101110363,101110444,101102362,10…
GO:0022838	substrate-specific channel activity	molecular_function	0.052625	1	90	3149	465	20255	101122539,101120562,101114673,101113830,101108392,101117260,101101870,101110050,101111209,780477,101119004,101102663,101109587,101102915,101102128,101113104,101103937,101123662,101105420,101103556,101120920,105614928,101108715,101106663,101123388,101108302,101110267,101108487,101113826,101122774,101103450,101122960,101104978,101111082,101102319,101113565,106991011,101102838,101115453,101118126,10…
GO:0019829	cation-transporting ATPase activity	molecular_function	0.052764	1	10	3149	36	20255	1.01109e+89
GO:0042625	ATPase activity, coupled to transmembrane movement of ions	molecular_function	0.052764	1	10	3149	36	20255	1.01109e+89
GO:0042127	regulation of cell proliferation	biological_process	0.053148	1	10	3149	36	20255	1.01109e+89
GO:0005092	GDP-dissociation inhibitor activity	molecular_function	0.05406	1	2	3149	3	20255	1.01122e+17
GO:0005094	Rho GDP-dissociation inhibitor activity	molecular_function	0.05406	1	2	3149	3	20255	1.01122e+17
GO:0006613	cotranslational protein targeting to membrane	biological_process	0.056495	1	14	3149	55	20255	1.01117e+125
GO:0017119	Golgi transport complex	cellular_component	0.057284	1	9	3149	32	20255	1.01113e+80
GO:0051861	glycolipid binding	molecular_function	0.058199	1	5	3149	14	20255	1.01107e+44
GO:0017004	cytochrome complex assembly	biological_process	0.058383	1	11	3149	41	20255	1.01112e+95
GO:0005085	guanyl-nucleotide exchange factor activity	molecular_function	0.059071	1	30	3149	134	20255	101109786,101119743,101110807,101107175,101123259,101115893,101121164,101112992,101113431,101110030,101104023,101113436,101115486,101120830,101108865,101107664,101104720,101122356,101105923,101110137,101118115,101112995,101121257,101110410,101107354,101118864,101110078,101107150,101105381,101115645
GO:0000062	fatty-acyl-CoA binding	molecular_function	0.05948	1	6	3149	19	20255	1.01122e+53
GO:0017089	glycolipid transporter activity	molecular_function	0.059575	1	4	3149	10	20255	1.01113e+35
GO:0046836	glycolipid transport	biological_process	0.059575	1	4	3149	10	20255	1.01113e+35
GO:0008107	galactoside 2-alpha-L-fucosyltransferase activity	molecular_function	0.059821	1	3	3149	6	20255	1.01103e+26
GO:0031127	alpha-(1,2)-fucosyltransferase activity	molecular_function	0.059821	1	3	3149	6	20255	1.01103e+26
GO:0005319	lipid transporter activity	molecular_function	0.059887	1	7	3149	22	20255	1.01107e+62
GO:0009273	peptidoglycan-based cell wall biogenesis	biological_process	0.060059	1	2	3149	3	20255	1.01104e+17
GO:0015267	channel activity	molecular_function	0.060336	1	90	3149	468	20255	101105917,101120360,101116562,101111411,101121389,105604604,105603946,101118435,101114135,101119467,101116360,105606102,101116998,101112591,101122859,443488,100302624,101110253,101111476,101115663,101103020,101121868,101121535,101106615,101116428,101121330,101114065,101105267,101119497,101104736,101117004,101108864,101114005,101114721,101110363,101110429,101122747,101120711,101102707,100170326,10…
GO:0022803	passive transmembrane transporter activity	molecular_function	0.060336	1	90	3149	468	20255	101102319,101104978,101111082,101115453,101102337,101118126,101113565,101102838,106991011,101108715,105614928,101122774,101122960,101103450,101106663,101123388,101108302,101110267,101108487,101113826,101119004,101102663,101109587,101102915,101102128,780477,101113104,101103937,101123662,101105420,101120920,101103556,101117260,101122539,101120562,101113830,101114673,101108392,101111209,101101870,10…
GO:0005839	proteasome core complex	cellular_component	0.060546	1	10	3149	40	20255	1.01113e+89
GO:0046873	metal ion transmembrane transporter activity	molecular_function	0.060686	1	96	3149	508	20255	101117260,101123170,101123290,101121414,101113830,101114673,101108392,101117157,101120562,101108848,101109534,101101873,101109587,101102128,101119004,101108370,101121677,780477,101104154,101118063,101117755,101108770,101103470,101109235,101112132,101113997,101122960,101123388,101106663,101108302,100302077,101122716,101105536,101109602,101116194,101104978,101102337,101118126,101122048,100302551,10…
GO:0044877	macromolecular complex binding	molecular_function	0.062784	1	70	3149	373	20255	443396,101112735,101108506,101110274,101115220,101104261,101105602,101118095,101113963,101119215,101123643,101111916,101110894,101109419,101107533,101122784,101110857,101109813,101123118,101122038,100302308,101120590,105601843,106990985,101114113,101114674,101109430,101121976,101109534,443415,105605158,101102985,101114396,101108554,101117755,101120650,101103725,101106535,101122564,101116998,10111…
GO:0050662	coenzyme binding	molecular_function	0.06346	1	58	3149	290	20255	101103527,101107035,101108191,101115897,101113161,101121015,101111883,443211,101108823,101105533,101120780,101112882,101121544,101111328,101118708,101114115,443533,101118915,101105876,101115252,101112590,101118970,101112735,106991345,105614928,101121876,100036762,101122882,101121924,101115552,101123137,100190978,101118731,101111818,101108066,101121880,101117173,101121554,101113856,101110109,10111…
GO:0004672	protein kinase activity	molecular_function	0.063463	1	132	3149	708	20255	101112033,101109430,101121208,101102890,101111281,101117721,101121166,101117245,101110150,101110900,101108429,101108266,101109460,101116218,101118961,101105786,101121391,101107523,101113251,101111530,101106255,101117561,101103190,101110437,101121302,101118723,100171396,101106860,101111916,101116802,101112260,101120569,101109754,101112234,101109637,101119341,101103527,101111351,101116114,101111852…
GO:0044406	adhesion of symbiont to host	biological_process	0.065246	1	4	3149	10	20255	1.01119e+35
GO:0002684	positive regulation of immune system process	biological_process	0.065277	1	7	3149	24	20255	1.05602e+62
GO:0050778	positive regulation of immune response	biological_process	0.065277	1	7	3149	24	20255	1.05602e+62
GO:0019843	rRNA binding	molecular_function	0.067081	1	8	3149	35	20255	1.01107e+71
GO:0006959	humoral immune response	biological_process	0.067614	1	7	3149	23	20255	1.01118e+62
GO:0042381	hemolymph coagulation	biological_process	0.067614	1	7	3149	23	20255	1.01118e+62
GO:0007283	spermatogenesis	biological_process	0.067654	1	10	3149	39	20255	1.01113e+89
GO:0048232	male gamete generation	biological_process	0.067654	1	10	3149	39	20255	1.0561e+89
GO:0003725	double-stranded RNA binding	molecular_function	0.0692	1	2	3149	3	20255	1.01109e+17
GO:0019104	DNA N-glycosylase activity	molecular_function	0.069664	1	4	3149	10	20255	1.01109e+35
GO:0019385	methanogenesis, from acetate	biological_process	0.070128	1	2	3149	3	20255	1.01102e+17
GO:0006352	DNA-templated transcription, initiation	biological_process	0.070266	1	32	3149	167	20255	101102272,101120739,443299,101114962,101122655,101109919,101119679,101102555,101102829,105609801,101119941,101116073,101118173,101110363,101106073,101105398,101110185,101105271,101105478,101111916,101120455,101112524,101119406,105605656,101111883,101110276,101113632,101123178,101115304,101109126,101107523,100307043
GO:0004661	protein geranylgeranyltransferase activity	molecular_function	0.070526	1	2	3149	3	20255	1.01114e+17
GO:0004663	Rab geranylgeranyltransferase activity	molecular_function	0.070526	1	2	3149	3	20255	1.01114e+17
GO:0097367	carbohydrate derivative binding	molecular_function	0.070599	1	371	3149	2128	20255	101110490,101121173,101110150,101117721,101117245,101115580,101110620,443415,101121208,101109430,101110196,101109312,101108266,101109385,101117328,101114460,101108554,101108429,101105090,106991387,101118723,101111607,101121302,101111010,101121112,101111593,101112132,101110274,101122822,101113276,101108182,101116114,101103865,101113866,101108361,101109637,101122598,101109754,101120569,101112597,10…
GO:0007276	gamete generation	biological_process	0.070827	1	24	3149	113	20255	1.05602e+215
GO:0051181	cofactor transport	biological_process	0.071489	1	7	3149	23	20255	1.01123e+59
GO:0004520	endodeoxyribonuclease activity	molecular_function	0.071621	1	13	3149	51	20255	1.01122e+116
GO:0006729	tetrahydrobiopterin biosynthetic process	biological_process	0.072362	1	2	3149	3	20255	1.01119e+17
GO:0008124	4-alpha-hydroxytetrahydrobiopterin dehydratase activity	molecular_function	0.072362	1	2	3149	3	20255	1.01107e+17
GO:0046146	tetrahydrobiopterin metabolic process	biological_process	0.072362	1	2	3149	3	20255	1.01107e+17
GO:0016491	oxidoreductase activity	molecular_function	0.07415	1	241	3149	1369	20255	101114707,101115897,101104086,101121567,101121015,101119830,100462743,101105616,101112094,101122806,101102377,101105559,101118571,101109375,101119193,101109816,101114115,101102664,101111900,101121876,101122926,101121924,101111362,101112591,101107354,101112832,101105533,101109709,101113195,101114630,101115197,101111645,101118708,101111818,101107249,101117173,101102548,101112818,101109820,101113856…
GO:0005096	GTPase activator activity	molecular_function	0.075179	1	19	3149	83	20255	1.01112e+167
GO:1901264	carbohydrate derivative transport	biological_process	0.075329	1	5	3149	15	20255	1.01111e+44
GO:0004435	phosphatidylinositol phospholipase C activity	molecular_function	0.075625	1	6	3149	18	20255	1.01117e+53
GO:0004629	phospholipase C activity	molecular_function	0.075625	1	6	3149	18	20255	1.01123e+53
GO:0016852	sirohydrochlorin cobaltochelatase activity	molecular_function	0.075641	1	2	3149	3	20255	1.05605e+17
GO:0007266	Rho protein signal transduction	biological_process	0.0761	1	18	3149	75	20255	1.01113e+161
GO:0035023	regulation of Rho protein signal transduction	biological_process	0.0761	1	18	3149	75	20255	1.01107e+161
GO:0006471	protein ADP-ribosylation	biological_process	0.077237	1	5	3149	15	20255	1.01117e+44
GO:0000041	transition metal ion transport	biological_process	0.077831	1	32	3149	155	20255	101115484,101122169,100302077,101116416,101116194,101102185,101120286,101118911,101113997,101117208,101112132,101112608,101117755,101108770,101113220,101120650,101111605,101108142,101108370,101103679,101121677,101110004,101104154,101103562,101109534,101104176,101123170,101114005,497272,101117157,101108848,101123290
GO:1902533	positive regulation of intracellular signal transduction	biological_process	0.077965	1	8	3149	29	20255	1.01108e+71
GO:0003856	3-dehydroquinate synthase activity	molecular_function	0.078129	1	2	3149	3	20255	1.01102e+17
GO:0004879	RNA polymerase II transcription factor activity, ligand-activated sequence-specific DNA binding	molecular_function	0.078772	1	5	3149	15	20255	1.01115e+41
GO:0004882	androgen receptor activity	molecular_function	0.078772	1	5	3149	15	20255	1.01115e+41
GO:0030521	androgen receptor signaling pathway	biological_process	0.078772	1	5	3149	15	20255	1.01115e+41
GO:0098531	transcription factor activity, direct ligand regulated sequence-specific DNA binding	molecular_function	0.078772	1	5	3149	15	20255	1.01106e+41
GO:0015649	2-keto-3-deoxygluconate:proton symporter activity	molecular_function	0.078783	1	2	3149	3	20255	1.01105e+17
GO:0046411	2-keto-3-deoxygluconate transport	biological_process	0.078783	1	2	3149	3	20255	1.01105e+17
GO:0030479	actin cortical patch	cellular_component	0.078979	1	2	3149	3	20255	1.01105e+17
GO:0030863	cortical cytoskeleton	cellular_component	0.078979	1	2	3149	3	20255	1.01107e+17
GO:0030864	cortical actin cytoskeleton	cellular_component	0.078979	1	2	3149	3	20255	1.01105e+17
GO:0061645	endocytic patch	cellular_component	0.078979	1	2	3149	3	20255	1.01107e+17
GO:0000148	1,3-beta-D-glucan synthase complex	cellular_component	0.079276	1	2	3149	3	20255	1.01113e+17
GO:0003843	1,3-beta-D-glucan synthase activity	molecular_function	0.079276	1	2	3149	3	20255	1.01111e+17
GO:0006074	(1->3)-beta-D-glucan metabolic process	biological_process	0.079276	1	2	3149	3	20255	1.01113e+17
GO:0006075	(1->3)-beta-D-glucan biosynthetic process	biological_process	0.079276	1	2	3149	3	20255	1.01111e+17
GO:0005245	voltage-gated calcium channel activity	molecular_function	0.079308	1	2	3149	3	20255	1.01123e+17
GO:0003872	6-phosphofructokinase activity	molecular_function	0.079308	1	2	3149	3	20255	443489443164
GO:0017070	U6 snRNA binding	molecular_function	0.079308	1	2	3149	3	20255	1.01112e+17
GO:0004764	shikimate 3-dehydrogenase (NADP+) activity	molecular_function	0.079308	1	2	3149	3	20255	1.01115e+17
GO:0015179	L-amino acid transmembrane transporter activity	molecular_function	0.079308	1	2	3149	3	20255	1.01109e+17
GO:0005088	Ras guanyl-nucleotide exchange factor activity	molecular_function	0.079386	1	19	3149	81	20255	1.01108e+170
GO:0005089	Rho guanyl-nucleotide exchange factor activity	molecular_function	0.079386	1	19	3149	81	20255	1.01113e+170
GO:0006612	protein targeting to membrane	biological_process	0.080331	1	14	3149	58	20255	1.01118e+125
GO:0019199	transmembrane receptor protein kinase activity	molecular_function	0.080473	1	14	3149	59	20255	4.43156e+113
GO:0010506	regulation of autophagy	biological_process	0.081562	1	21	3149	93	20255	1.01114e+188
GO:0019362	pyridine nucleotide metabolic process	biological_process	0.082455	1	12	3149	48	20255	1.00038e+98
GO:0046496	nicotinamide nucleotide metabolic process	biological_process	0.082455	1	12	3149	48	20255	1.01103e+98
GO:0008092	cytoskeletal protein binding	molecular_function	0.083608	1	94	3149	503	20255	101120768,101114931,101115993,101106839,101108554,101107783,101118044,101102985,101117024,101109254,101107995,101113439,101105192,443415,101105381,101114982,101114674,101102925,101107392,101109430,101106132,106990985,101109503,101113343,101122038,101122784,101107533,101103274,101115336,105603925,101110894,101109602,101116925,101119643,101118095,101113963,106990980,101110390,101123207,101123425,10…
GO:0031423	hexon binding	molecular_function	0.083778	1	3	3149	7	20255	1.01102e+26
GO:0046131	pyrimidine ribonucleoside metabolic process	biological_process	0.084131	1	4	3149	11	20255	1.01102e+35
GO:0048584	positive regulation of response to stimulus	biological_process	0.084481	1	16	3149	73	20255	1.01116e+143
GO:0005272	sodium channel activity	molecular_function	0.084684	1	10	3149	38	20255	1.01105e+86
GO:0019062	virion attachment to host cell	biological_process	0.087008	1	3	3149	7	20255	1.05606e+26
GO:0044650	adhesion of symbiont to host cell	biological_process	0.087008	1	3	3149	7	20255	1.01119e+26
GO:0008556	potassium-transporting ATPase activity	molecular_function	0.08718	1	4	3149	11	20255	1.01116e+35
GO:0004843	ubiquitin-specific protease activity	molecular_function	0.087874	1	4	3149	11	20255	1.01116e+35
GO:0001664	G-protein coupled receptor binding	molecular_function	0.088419	1	13	3149	61	20255	1.01115e+113
GO:0007264	small GTPase mediated signal transduction	biological_process	0.088501	1	78	3149	416	20255	101120485,100101233,101107592,101108447,101108142,101115486,101104023,101113436,100145873,101107545,101121164,101112992,101112995,101121257,101110137,101114005,101122356,101115645,101103562,100302302,100147795,101123259,101111683,101102185,100145880,101101937,101120830,101122169,101104530,101106774,101112608,101104720,105609617,101115341,101112448,101118911,101107354,101118864,101121677,101116859…
GO:0004514	nicotinate-nucleotide diphosphorylase (carboxylating) activity	molecular_function	0.088588	1	3	3149	7	20255	1.01103e+26
GO:0016799	hydrolase activity, hydrolyzing N-glycosyl compounds	molecular_function	0.089688	1	6	3149	20	20255	1.01121e+53
GO:0009072	aromatic amino acid family metabolic process	biological_process	0.089852	1	8	3149	29	20255	1.01102e+71
GO:0007016	cytoskeletal anchoring at plasma membrane	biological_process	0.090911	1	3	3149	7	20255	1.01113e+26
GO:0007265	Ras protein signal transduction	biological_process	0.091238	1	21	3149	92	20255	1.01123e+188
GO:0046578	regulation of Ras protein signal transduction	biological_process	0.091238	1	21	3149	92	20255	1.01118e+188
GO:0006304	DNA modification	biological_process	0.092236	1	10	3149	38	20255	1.01115e+89
GO:0006891	intra-Golgi vesicle-mediated transport	biological_process	0.093492	1	12	3149	49	20255	1.01117e+107
GO:0005247	voltage-gated chloride channel activity	molecular_function	0.093761	1	4	3149	11	20255	1.05605e+35
GO:0005254	chloride channel activity	molecular_function	0.093761	1	4	3149	11	20255	1.01111e+35
GO:0008308	voltage-gated anion channel activity	molecular_function	0.093761	1	4	3149	11	20255	1.01111e+35
GO:0015108	chloride transmembrane transporter activity	molecular_function	0.093761	1	4	3149	11	20255	1.05605e+35
GO:0031854	orexigenic neuropeptide QRFP receptor binding	molecular_function	0.094537	1	1	3149	1	20255	100145885
GO:0030855	epithelial cell differentiation	biological_process	0.096006	1	14	3149	61	20255	1.01109e+125
GO:0036094	small molecule binding	molecular_function	0.096133	1	406	3149	2349	20255	101112033,105601843,101123290,101107191,101102890,101104195,101103614,101106877,101111281,101110900,101108370,105605158,101104154,101104441,101109460,101116218,101121391,100302745,101119070,101104719,101105786,101110495,101118915,101107523,101108506,101117561,105614928,101117606,101116797,101111723,101108823,101110437,101103190,101107765,101106860,100171396,101115382,101111916,100302077,101114145…
GO:0051382	kinetochore assembly	biological_process	0.097137	1	8	3149	32	20255	1.01105e+71
GO:0051383	kinetochore organization	biological_process	0.097137	1	8	3149	32	20255	1.01105e+71
GO:0044724	single-organism carbohydrate catabolic process	biological_process	0.10036	1	10	3149	40	20255	1.00038e+80
GO:0005815	microtubule organizing center	cellular_component	0.1009	1	15	3149	64	20255	1.01112e+134
GO:0003873	6-phosphofructo-2-kinase activity	molecular_function	0.10147	1	7	3149	27	20255	1.01123e+62
GO:0006000	fructose metabolic process	biological_process	0.10147	1	7	3149	27	20255	1.01108e+62
GO:0009061	anaerobic respiration	biological_process	0.10164	1	8	3149	30	20255	1.0699e+71
GO:0015948	methanogenesis	biological_process	0.10164	1	8	3149	30	20255	1.0699e+71
GO:0015975	energy derivation by oxidation of reduced inorganic compounds	biological_process	0.10164	1	8	3149	30	20255	1.01121e+71
GO:0043447	alkane biosynthetic process	biological_process	0.10164	1	8	3149	30	20255	1.0699e+71
GO:0090575	RNA polymerase II transcription factor complex	cellular_component	0.10165	1	13	3149	62	20255	1.01123e+116
GO:0072524	pyridine-containing compound metabolic process	biological_process	0.10191	1	12	3149	50	20255	1.01102e+98
GO:0009405	pathogenesis	biological_process	0.10232	1	81	3149	436	20255	101121218,105602060,101108691,101109312,101114859,106991247,101113948,101111534,101121033,101102616,101107051,101103725,101112495,101104453,100125620,101113926,101117373,443302,101102952,101109018,101118812,101105923,101114594,780505,101102084,101110894,101117520,101106345,101117085,101103918,101107873,101102341,101119226,100141297,101108864,101117137,101114006,101117960,541606,101108035,10110365…
GO:0065009	regulation of molecular function	biological_process	0.10368	1	32	3149	157	20255	101109235,101101970,101119187,101123178,101120685,101103497,101112524,101115175,101119126,101108430,101108987,100505402,101122784,780470,101111663,101108748,101117886,101121163,101112751,101121671,101105404,101113828,101120041,101108447,101111239,100101234,101109393,443087,101121971,101123030,101122097,101109895
GO:0046906	tetrapyrrole binding	molecular_function	0.10506	1	35	3149	181	20255	101106452,101106641,100170113,100568289,767576,101105185,101103925,101119315,101105610,101122731,105613870,101106199,100307038,101106985,101105114,105604882,101115235,101103439,101102928,101122521,101103006,101116797,101112384,443533,101116408,101108535,101105651,106992010,101105437,105612707,101118441,101102377,101109214,101104703,100534653
GO:0009236	cobalamin biosynthetic process	biological_process	0.10511	1	7	3149	25	20255	1.01121e+62
GO:0009888	tissue development	biological_process	0.1053	1	22	3149	107	20255	1.01107e+197
GO:0006096	glycolytic process	biological_process	0.10572	1	8	3149	30	20255	4.43164e+62
GO:0006757	ATP generation from ADP	biological_process	0.10572	1	8	3149	30	20255	4.43164e+62
GO:0009135	purine nucleoside diphosphate metabolic process	biological_process	0.10572	1	8	3149	30	20255	1.01103e+62
GO:0009179	purine ribonucleoside diphosphate metabolic process	biological_process	0.10572	1	8	3149	30	20255	4.43164e+62
GO:0009185	ribonucleoside diphosphate metabolic process	biological_process	0.10572	1	8	3149	30	20255	4.43164e+62
GO:0046031	ADP metabolic process	biological_process	0.10572	1	8	3149	30	20255	1.0111e+62
GO:0006614	SRP-dependent cotranslational protein targeting to membrane	biological_process	0.10599	1	11	3149	45	20255	1.01108e+98
GO:0045047	protein targeting to ER	biological_process	0.10599	1	11	3149	45	20255	1.01108e+98
GO:0072599	establishment of protein localization to endoplasmic reticulum	biological_process	0.10599	1	11	3149	45	20255	1.01123e+98
GO:0009132	nucleoside diphosphate metabolic process	biological_process	0.10609	1	11	3149	45	20255	4.43164e+89
GO:0008283	cell proliferation	biological_process	0.10611	1	10	3149	41	20255	1.01102e+89
GO:0006094	gluconeogenesis	biological_process	0.10632	1	5	3149	16	20255	1.00038e+44
GO:0019319	hexose biosynthetic process	biological_process	0.10632	1	5	3149	16	20255	1.01117e+44
GO:0046364	monosaccharide biosynthetic process	biological_process	0.10632	1	5	3149	16	20255	1.00038e+44
GO:0016810	hydrolase activity, acting on carbon-nitrogen (but not peptide) bonds	molecular_function	0.10647	1	20	3149	91	20255	4.43369e+176
GO:0008276	protein methyltransferase activity	molecular_function	0.10679	1	14	3149	61	20255	1.01119e+125
GO:0030312	external encapsulating structure	cellular_component	0.10742	1	26	3149	126	20255	105601867,101108799,101120384,105601924,101106564,101108788,101118372,101113511,101121112,100885767,101114650,101101974,101107485,101109126,101106972,101111144,101106403,101107386,101109063,101106848,101113775,101115297,101104446,101104023,101114106,101110722
GO:0051056	regulation of small GTPase mediated signal transduction	biological_process	0.10746	1	23	3149	104	20255	1.01105e+206
GO:0000786	nucleosome	cellular_component	0.10777	1	9	3149	40	20255	1.01112e+80
GO:0042493	response to drug	biological_process	0.10811	1	5	3149	16	20255	1.00146e+44
GO:0005126	cytokine receptor binding	molecular_function	0.10848	1	27	3149	147	20255	101120468,101114714,101120217,101104506,101110406,101104661,101122801,443064,678679,101118373,101116184,101114535,101120899,101119957,101108206,101111035,101108489,103611088,443396,101120011,101102699,101114784,101105167,101109630,100101238,101116972,101113261
GO:0016778	diphosphotransferase activity	molecular_function	0.10869	1	4	3149	12	20255	1.01116e+35
GO:0043168	anion binding	molecular_function	0.10883	1	407	3149	2364	20255	101104001,100101228,101110526,101117487,101114662,101102185,780507,100145880,105608969,101116166,101113972,101104173,101117115,101120532,101114525,101103793,101113123,101106773,101113101,101116097,101116998,101123382,101104335,101109232,101112590,101115707,101109874,105609617,443533,101106367,100036759,101122739,101116999,101117519,101105763,101103094,101120485,101110575,101103124,101119807,10110…
GO:0004713	protein tyrosine kinase activity	molecular_function	0.10888	1	8	3149	29	20255	1.01109e+62
GO:0008009	chemokine activity	molecular_function	0.10897	1	9	3149	41	20255	1.01115e+77
GO:0042379	chemokine receptor binding	molecular_function	0.10897	1	9	3149	41	20255	6.78679e+77
GO:0016788	hydrolase activity, acting on ester bonds	molecular_function	0.10898	1	171	3149	954	20255	101106353,101123086,101102951,101110043,101109087,101121974,101117245,101107995,105611408,101118423,101109197,101115870,101105772,101109393,101120272,100820736,105616123,101106255,101111593,101106022,105605702,101105406,101102368,101122934,101106603,101103341,101111382,101103081,101116105,101113642,101108823,101120569,101112077,101108181,105605676,106991649,101120758,101108816,101120879,105608895…
GO:1990234	transferase complex	cellular_component	0.10932	1	62	3149	339	20255	101119941,101109720,101121218,101112876,101102825,101116532,101117261,101109123,101111383,101103077,105607037,101118472,101110301,101115684,101118173,101109127,101111224,101107383,105604186,101112198,101102272,101120739,101113383,101102182,101120050,101108196,101122655,100101234,101119679,101118862,101110406,101116536,101109126,101102863,101113632,101114214,101105623,101107523,105607297,101107664…
GO:0045095	keratin filament	cellular_component	0.10935	1	11	3149	56	20255	1.05605e+98
GO:0008047	enzyme activator activity	molecular_function	0.10953	1	22	3149	105	20255	1.01102e+194
GO:0016861	intramolecular oxidoreductase activity, interconverting aldoses and ketoses	molecular_function	0.11074	1	8	3149	32	20255	1.01121e+71
GO:0006801	superoxide metabolic process	biological_process	0.11152	1	3	3149	8	20255	1.01118e+26
GO:0009893	positive regulation of metabolic process	biological_process	0.11208	1	39	3149	198	20255	101113585,101114962,101111739,101111605,101121971,101123030,101105772,101107783,101119818,101109873,101121671,101104678,101115946,101109630,101106073,101108206,101110363,101108987,100505402,101105398,101116184,101111663,101106774,101115315,101114502,100307039,101111916,101104081,101109602,101102185,101111791,101113261,101115304,101116087,101108814,101114784,101120440,101102584,100820750
GO:0043167	ion binding	molecular_function	0.11241	1	915	3149	5452	20255	100302745,100820736,101120760,105605821,101112390,101117092,101105786,101104441,101107051,101112704,101109460,101123572,101116218,101122970,101111171,101103063,101102386,101110900,101108370,105605158,101107812,100037684,101102890,101104195,101106877,101123290,494443,101104709,101112033,101102951,105601843,100307044,100302099,101113447,101103859,101123343,105606081,101120263,101121529,101103918,10…
GO:0046915	transition metal ion transmembrane transporter activity	molecular_function	0.11291	1	28	3149	138	20255	100302077,101108370,101116194,101110004,101102185,101104154,101121677,101116416,101108770,101117755,101122169,101108142,101115484,101111605,101114005,101123170,101112608,101123290,101112132,101108848,497272,101117157,101113997,101120286,101118911,101103562,101109534,101117208
GO:0015093	ferrous iron transmembrane transporter activity	molecular_function	0.1139	1	19	3149	89	20255	1.01108e+170
GO:0015684	ferrous iron transport	biological_process	0.1139	1	19	3149	89	20255	1.01119e+170
GO:0072511	divalent inorganic cation transport	biological_process	0.11419	1	29	3149	142	20255	101114909,101108370,100302077,101104978,101113317,101121677,101110004,101116194,101102185,101104154,101117755,101108770,101115484,101108142,101122169,101114005,497272,101112132,101112591,101112608,101123290,101109534,101103562,101118911,101122960,101120286,101113997,101108864,101117397
GO:0004143	diacylglycerol kinase activity	molecular_function	0.11446	1	4	3149	12	20255	1.01123e+35
GO:0003879	ATP phosphoribosyltransferase activity	molecular_function	0.11446	1	3	3149	8	20255	1.01104e+26
GO:0030674	protein binding, bridging	molecular_function	0.11561	1	26	3149	125	20255	101104153,105607318,101111755,101114953,101122564,101121484,101109430,100302340,101118036,101117014,101117645,101111010,101109471,101122954,101115403,101107783,101103607,101108447,101109602,101112429,101114292,101106373,101120243,101122038,101114931,101106095
GO:0060090	binding, bridging	molecular_function	0.11561	1	26	3149	125	20255	101120243,101122038,101114931,101106095,101112429,101114292,101106373,101107783,101103607,101108447,101109602,101115403,101118036,101117014,101117645,101111010,101109471,101122954,101121484,101109430,100302340,105607318,101104153,101111755,101114953,101122564
GO:0010008	endosome membrane	cellular_component	0.11747	1	4	3149	12	20255	1.01111e+32
GO:0007126	meiotic nuclear division	biological_process	0.11823	1	9	3149	35	20255	1.01114e+80
GO:1903046	meiotic cell cycle process	biological_process	0.11823	1	9	3149	35	20255	1.05602e+80
GO:0006790	sulfur compound metabolic process	biological_process	0.11885	1	18	3149	80	20255	1.01121e+161
GO:0031325	positive regulation of cellular metabolic process	biological_process	0.11901	1	37	3149	188	20255	101107783,101119818,101105772,101123030,101111739,101114962,101111605,101121971,101113585,101108206,101110363,101106073,101109630,101104678,101115946,101109873,101109602,101102185,101104081,101111916,100307039,101114502,101115315,101105398,101111663,101116184,101106774,100505402,101102584,100820750,101120440,101114784,101116087,101108814,101115304,101113261,101111791
GO:0010340	carboxyl-O-methyltransferase activity	molecular_function	0.11907	1	8	3149	32	20255	1.01104e+71
GO:0051998	protein carboxyl O-methyltransferase activity	molecular_function	0.11907	1	8	3149	32	20255	1.01111e+71
GO:0015947	methane metabolic process	biological_process	0.1195	1	8	3149	31	20255	1.00136e+71
GO:0043446	cellular alkane metabolic process	biological_process	0.1195	1	8	3149	31	20255	1.01121e+71
GO:0006826	iron ion transport	biological_process	0.11987	1	21	3149	100	20255	1.01118e+188
GO:0019773	proteasome core complex, alpha-subunit complex	cellular_component	0.12007	1	6	3149	22	20255	1.01111e+53
GO:0005667	transcription factor complex	cellular_component	0.12019	1	16	3149	79	20255	1.01114e+143
GO:0009125	nucleoside monophosphate catabolic process	biological_process	0.12136	1	1	3149	1	20255	101111670
GO:0009159	deoxyribonucleoside monophosphate catabolic process	biological_process	0.12136	1	1	3149	1	20255	101111670
GO:0050144	nucleoside deoxyribosyltransferase activity	molecular_function	0.12136	1	1	3149	1	20255	101111670
GO:0070694	deoxyribonucleoside 5'-monophosphate N-glycosidase activity	molecular_function	0.12136	1	1	3149	1	20255	101111670
GO:0007601	visual perception	biological_process	0.12142	1	2	3149	4	20255	1.01118e+17
GO:0030551	cyclic nucleotide binding	molecular_function	0.12142	1	2	3149	4	20255	1.01109e+17
GO:0030553	cGMP binding	molecular_function	0.12142	1	2	3149	4	20255	1.01118e+17
GO:0050953	sensory perception of light stimulus	biological_process	0.12142	1	2	3149	4	20255	1.01118e+17
GO:0001932	regulation of protein phosphorylation	biological_process	0.12146	1	6	3149	21	20255	1.01123e+53
GO:0004198	calcium-dependent cysteine-type endopeptidase activity	molecular_function	0.1217	1	5	3149	16	20255	1.01114e+44
GO:0000166	nucleotide binding	molecular_function	0.12172	1	394	3149	2292	20255	101107113,101111328,101104261,101115254,101122886,101115463,101115252,101109464,101112735,101104055,101102612,100302308,101115484,101123118,101123660,101113475,101107533,101113252,101107117,101117520,101116194,101106333,101119510,101105117,101101873,101107106,554324,101121480,101109534,101121976,101103175,101117517,100147794,101121821,101104887,101107151,101115623,101111163,101117755,101122519,10…
GO:1901265	nucleoside phosphate binding	molecular_function	0.12172	1	394	3149	2292	20255	101113161,101121324,101109648,101114145,100302077,101111916,101123073,101122460,101118398,101103918,101103928,101112260,101112234,101121529,101123343,101107428,101111351,106991125,101108506,101107523,101118915,101110495,101117606,105614928,101117561,101103190,101110437,101108823,101111723,101106860,101115382,100171396,101107765,105605158,101108370,101110900,101104154,101109460,101116218,101104441…
GO:0050750	low-density lipoprotein particle receptor binding	molecular_function	0.1219	1	2	3149	4	20255	1.01121e+17
GO:0070325	lipoprotein particle receptor binding	molecular_function	0.1219	1	2	3149	4	20255	1.01121e+17
GO:0070838	divalent metal ion transport	biological_process	0.12199	1	26	3149	127	20255	101104978,101116194,101102185,101110004,101104154,101121677,101113317,101114909,101108370,100302077,101108142,101115484,101122169,101117755,101112591,101112132,101123290,101112608,101114005,101108864,101117397,101122960,101118911,101103562,101109534,101113997
GO:0030001	metal ion transport	biological_process	0.12221	1	92	3149	502	20255	101103470,101112132,101108302,101123388,101106663,101113997,101122960,101116194,101109602,101104978,100302077,101122716,101103490,101115484,100302551,101122048,101113830,101123290,101121414,101114673,101120562,101108848,101117157,101117260,101123170,101104176,101109534,101104154,101121677,101102386,101109587,101108370,101119004,101120650,101108770,101113220,101117755,101112608,101112591,101116998…
GO:0009611	response to wounding	biological_process	0.12246	1	34	3149	171	20255	105607318,105614855,101109430,101117014,101122954,101107995,767576,101106120,101117462,101107783,101103607,101110444,101112429,101114292,101114931,101104153,101114953,101111755,101122564,101118299,101121484,101104626,101111010,101109471,101110078,443453,101106905,101113609,101115175,101112260,101109602,101119329,101106373,101120243
GO:0042060	wound healing	biological_process	0.12246	1	34	3149	171	20255	101122564,101111755,101114953,101104153,101121484,101118299,101110078,101109471,101104626,101111010,101106905,443453,101115175,101113609,101109602,101112260,101106373,101119329,101120243,105607318,101109430,105614855,101122954,101117014,767576,101107995,101117462,101106120,101103607,101107783,101114292,101112429,101110444,101114931
GO:0030435	sporulation resulting in formation of a cellular spore	biological_process	0.12258	1	4	3149	12	20255	1.00192e+35
GO:0002064	epithelial cell development	biological_process	0.12262	1	13	3149	58	20255	1.01104e+116
GO:0002065	columnar/cuboidal epithelial cell differentiation	biological_process	0.12262	1	13	3149	58	20255	1.01109e+116
GO:0002066	columnar/cuboidal epithelial cell development	biological_process	0.12262	1	13	3149	58	20255	1.0112e+116
GO:0005213	structural constituent of chorion	molecular_function	0.12262	1	13	3149	58	20255	1.01109e+116
GO:0007292	female gamete generation	biological_process	0.12262	1	13	3149	58	20255	1.01111e+116
GO:0007304	chorion-containing eggshell formation	biological_process	0.12262	1	13	3149	58	20255	1.01114e+116
GO:0030703	eggshell formation	biological_process	0.12262	1	13	3149	58	20255	1.05602e+116
GO:0030707	ovarian follicle cell development	biological_process	0.12262	1	13	3149	58	20255	1.01109e+116
GO:0048477	oogenesis	biological_process	0.12262	1	13	3149	58	20255	1.01102e+116
GO:0000772	mating pheromone activity	molecular_function	0.12281	1	4	3149	12	20255	1.01105e+35
GO:0008733	L-arabinose isomerase activity	molecular_function	0.12296	1	1	3149	1	20255	101122992
GO:0016426	tRNA (adenine) methyltransferase activity	molecular_function	0.12297	1	4	3149	13	20255	1.01103e+35
GO:0016429	tRNA (adenine-N1-)-methyltransferase activity	molecular_function	0.12297	1	4	3149	13	20255	1.0112e+35
GO:0006090	pyruvate metabolic process	biological_process	0.12397	1	8	3149	31	20255	1.01117e+62
GO:0016073	snRNA metabolic process	biological_process	0.12411	1	2	3149	4	20255	1.01122e+17
GO:0016180	snRNA processing	biological_process	0.12411	1	2	3149	4	20255	1.0111e+17
GO:0034472	snRNA 3'-end processing	biological_process	0.12411	1	2	3149	4	20255	1.0111e+17
GO:0034477	U6 snRNA 3'-end processing	biological_process	0.12411	1	2	3149	4	20255	1.0111e+17
GO:0043628	ncRNA 3'-end processing	biological_process	0.12411	1	2	3149	4	20255	1.01122e+17
GO:0005253	anion channel activity	molecular_function	0.12421	1	4	3149	12	20255	1.01111e+35
GO:0019359	nicotinamide nucleotide biosynthetic process	biological_process	0.12422	1	4	3149	12	20255	1.01102e+35
GO:0000159	protein phosphatase type 2A complex	cellular_component	0.12515	1	3	3149	8	20255	1.01105e+26
GO:0008601	protein phosphatase type 2A regulator activity	molecular_function	0.12515	1	3	3149	8	20255	1.01105e+26
GO:0009235	cobalamin metabolic process	biological_process	0.12524	1	7	3149	26	20255	1.01105e+62
GO:0008521	acetyl-CoA transporter activity	molecular_function	0.12597	1	2	3149	4	20255	1.01107e+17
GO:0051185	coenzyme transporter activity	molecular_function	0.12597	1	2	3149	4	20255	1.01122e+17
GO:0004714	transmembrane receptor protein tyrosine kinase activity	molecular_function	0.12611	1	5	3149	16	20255	1.01105e+38
GO:0007599	hemostasis	biological_process	0.12727	1	31	3149	154	20255	101110078,101109471,101122954,101117014,101111010,101104626,767576,101107995,443453,101111755,101114953,101122564,105607318,101104153,101118299,101109430,101121484,101114292,101106373,101119329,101110444,101112429,101114931,101120243,101115175,101106120,101113609,101103607,101112260,101109602,101107783
GO:0050817	coagulation	biological_process	0.12727	1	31	3149	154	20255	101122564,101111755,101114953,101104153,105607318,101121484,101109430,101118299,101122954,101110078,101109471,101104626,101111010,101117014,767576,101107995,443453,101115175,101113609,101106120,101109602,101103607,101112260,101107783,101119329,101106373,101114292,101110444,101112429,101114931,101120243
GO:0050878	regulation of body fluid levels	biological_process	0.12727	1	31	3149	154	20255	101120243,101114931,101112429,101110444,101114292,101119329,101106373,101107783,101103607,101112260,101109602,101106120,101113609,101115175,443453,101107995,767576,101117014,101111010,101104626,101109471,101110078,101122954,101118299,101109430,101121484,105607318,101104153,101114953,101111755,101122564
GO:0005996	monosaccharide metabolic process	biological_process	0.12727	1	19	3149	93	20255	1.01118e+167
GO:0008839	4-hydroxy-tetrahydrodipicolinate reductase	molecular_function	0.12768	1	4	3149	13	20255	1.01118e+32
GO:0009435	NAD biosynthetic process	biological_process	0.12785	1	3	3149	8	20255	1.01116e+26
GO:0019674	NAD metabolic process	biological_process	0.12785	1	3	3149	8	20255	1.01102e+26
GO:0000724	double-strand break repair via homologous recombination	biological_process	0.1279	1	2	3149	4	20255	1.0111e+17
GO:0006083	acetate metabolic process	biological_process	0.12914	1	2	3149	4	20255	1.01102e+17
GO:0070972	protein localization to endoplasmic reticulum	biological_process	0.12929	1	12	3149	52	20255	1.01116e+107
GO:0050790	regulation of catalytic activity	biological_process	0.12974	1	29	3149	144	20255	101117886,101119187,101121671,101112751,101105404,101120685,101108748,101109235,101101970,101108430,101123030,101119126,101121971,101111663,780470,101109895,101122784,101108987,101122097,100505402,101111239,101120041,101108447,101103497,101113828,443087,101115175,101109393,100101234
GO:0015698	inorganic anion transport	biological_process	0.13004	1	13	3149	57	20255	1.01106e+116
GO:0005133	interferon-gamma receptor binding	molecular_function	0.13055	1	2	3149	4	20255	101110406443396
GO:0006952	defense response	biological_process	0.13057	1	67	3149	372	20255	101109063,101120777,101121195,101104740,101117183,101114594,100127211,101107931,100034669,101103211,101118299,105605702,101110078,101104186,101118095,101108367,101123199,100302356,101121216,101123668,101120179,101115870,105602068,101121033,101114931,101120651,101121414,101109873,101107981,101107995,105604171,101113609,101119830,101120204,101114621,101119329,101122633,101113090,101119046,101106755…
GO:0000012	single strand break repair	biological_process	0.13079	1	2	3149	4	20255	1.01103e+17
GO:0032553	ribonucleotide binding	molecular_function	0.13191	1	349	3149	2032	20255	101103562,101121088,101122959,101115027,101111117,101119457,101111852,105606135,101109789,101114356,101112429,101118731,101108572,780519,101119686,101121554,101103677,101104881,101102997,101116568,101108923,101115179,443453,101109779,101113412,101114265,101107841,101105623,101119979,101114544,101115931,101112608,101112350,101111612,101118124,101105877,101107621,101112932,101120826,101108969,10111…
GO:0005912	adherens junction	cellular_component	0.13198	1	4	3149	12	20255	4.43005e+32
GO:0005924	cell-substrate adherens junction	cellular_component	0.13198	1	4	3149	12	20255	1.01113e+32
GO:0005925	focal adhesion	cellular_component	0.13198	1	4	3149	12	20255	1.01115e+32
GO:0030055	cell-substrate junction	cellular_component	0.13198	1	4	3149	12	20255	1.01115e+32
GO:0070161	anchoring junction	cellular_component	0.13198	1	4	3149	12	20255	1.01115e+32
GO:0033313	meiotic cell cycle checkpoint	biological_process	0.13251	1	2	3149	4	20255	1.01112e+17
GO:0040020	regulation of meiotic nuclear division	biological_process	0.13251	1	2	3149	4	20255	1.01106e+17
GO:0045835	negative regulation of meiotic nuclear division	biological_process	0.13251	1	2	3149	4	20255	1.01112e+17
GO:0051445	regulation of meiotic cell cycle	biological_process	0.13251	1	2	3149	4	20255	1.01106e+17
GO:0051447	negative regulation of meiotic cell cycle	biological_process	0.13251	1	2	3149	4	20255	1.01106e+17
GO:0051598	meiotic recombination checkpoint	biological_process	0.13251	1	2	3149	4	20255	1.01106e+17
GO:0044780	bacterial-type flagellum assembly	biological_process	0.13423	1	5	3149	17	20255	1.01108e+44
GO:0000702	oxidized base lesion DNA N-glycosylase activity	molecular_function	0.13504	1	2	3149	4	20255	1.01109e+17
GO:0008534	oxidized purine nucleobase lesion DNA N-glycosylase activity	molecular_function	0.13504	1	2	3149	4	20255	1.01109e+17
GO:0070206	protein trimerization	biological_process	0.13525	1	8	3149	32	20255	1.01114e+68
GO:0005794	Golgi apparatus	cellular_component	0.13553	1	25	3149	122	20255	1.01119e+224
GO:0005615	extracellular space	cellular_component	0.13594	1	39	3149	201	20255	101106995,101107783,101103607,101103925,101123419,101112429,101114292,101118731,101123030,101114931,105607318,101111247,101109630,101105541,101113586,101109430,101108206,101117014,101123672,101122954,101107485,101109602,101111507,780505,101116184,101106373,101120243,101104153,101111755,101116142,101114953,101122564,101114784,443206,101121484,101111010,101113261,101109471,101109165
GO:0045502	dynein binding	molecular_function	0.13627	1	21	3149	100	20255	1.01115e+188
GO:0001907	killing by symbiont of host cells	biological_process	0.13685	1	4	3149	12	20255	1.01106e+32
GO:0044004	disruption by symbiont of host cell	biological_process	0.13685	1	4	3149	12	20255	1.01119e+32
GO:0032786	positive regulation of DNA-templated transcription, elongation	biological_process	0.13766	1	6	3149	24	20255	1.01105e+53
GO:0032968	positive regulation of transcription elongation from RNA polymerase II promoter	biological_process	0.13766	1	6	3149	24	20255	1.01112e+53
GO:0034243	regulation of transcription elongation from RNA polymerase II promoter	biological_process	0.13766	1	6	3149	24	20255	1.01106e+53
GO:0016437	tRNA cytidylyltransferase activity	molecular_function	0.13799	1	2	3149	4	20255	1.01114e+17
GO:0046849	bone remodeling	biological_process	0.13808	1	4	3149	15	20255	4.43312e+32
GO:0048771	tissue remodeling	biological_process	0.13808	1	4	3149	15	20255	1.01105e+32
GO:0005787	signal peptidase complex	cellular_component	0.13871	1	6	3149	22	20255	1.01106e+53
GO:0006465	signal peptide processing	biological_process	0.13871	1	6	3149	22	20255	1.01111e+53
GO:0016628	oxidoreductase activity, acting on the CH-CH group of donors, NAD or NADP as acceptor	molecular_function	0.13907	1	9	3149	38	20255	1.01122e+77
GO:0008121	ubiquinol-cytochrome-c reductase activity	molecular_function	0.13947	1	8	3149	32	20255	1.01113e+71
GO:0016681	oxidoreductase activity, acting on diphenols and related substances as donors, cytochrome as acceptor	molecular_function	0.13947	1	8	3149	32	20255	1.01118e+71
GO:0022412	cellular process involved in reproduction in multicellular organism	biological_process	0.14036	1	15	3149	71	20255	1.01104e+134
GO:0004813	alanine-tRNA ligase activity	molecular_function	0.14062	1	2	3149	4	20255	1.01114e+17
GO:0006419	alanyl-tRNA aminoacylation	biological_process	0.14062	1	2	3149	4	20255	1.01119e+17
GO:0018492	carbon-monoxide dehydrogenase (acceptor) activity	molecular_function	0.14064	1	2	3149	4	20255	1.01102e+17
GO:0004517	nitric-oxide synthase activity	molecular_function	0.14064	1	2	3149	4	20255	443533443077
GO:0006809	nitric oxide biosynthetic process	biological_process	0.14064	1	2	3149	4	20255	443077443533
GO:0046209	nitric oxide metabolic process	biological_process	0.14064	1	2	3149	4	20255	443533443077
GO:1903409	reactive oxygen species biosynthetic process	biological_process	0.14064	1	2	3149	4	20255	443533443077
GO:0000288	nuclear-transcribed mRNA catabolic process, deadenylation-dependent decay	biological_process	0.14064	1	2	3149	4	20255	1.01122e+17
GO:0000290	deadenylation-dependent decapping of nuclear-transcribed mRNA	biological_process	0.14064	1	2	3149	4	20255	1.01114e+17
GO:0004683	calmodulin-dependent protein kinase activity	molecular_function	0.14064	1	2	3149	4	20255	443453101113850
GO:0008725	DNA-3-methyladenine glycosylase activity	molecular_function	0.14064	1	2	3149	4	20255	1.01122e+17
GO:0043733	DNA-3-methylbase glycosylase activity	molecular_function	0.14064	1	2	3149	4	20255	1.01119e+17
GO:0000003	reproduction	biological_process	0.14177	1	58	3149	315	20255	101109471,101110306,101111791,101104674,101111010,101107300,101116107,101121988,101111819,101114421,100885767,101101974,101110365,101109126,101108799,101108482,105612424,101120384,101102584,101118372,101122784,101113866,101102760,101101937,101105836,101108877,101106072,101122588,101106848,101109063,101112876,101104246,101115414,101107485,101109087,101123025,101114117,105601924,541606,101107484,10…
GO:0051346	negative regulation of hydrolase activity	biological_process	0.14248	1	8	3149	33	20255	4.43087e+68
GO:0030261	chromosome condensation	biological_process	0.14311	1	4	3149	13	20255	1.01105e+35
GO:0043648	dicarboxylic acid metabolic process	biological_process	0.1437	1	7	3149	28	20255	1.01118e+59
GO:0030414	peptidase inhibitor activity	molecular_function	0.14388	1	32	3149	165	20255	101105017,101103901,100217407,101104772,101104205,780471,101104001,101115175,443392,101107904,101104518,105606875,101113311,101117532,101101855,101111287,101115287,101116142,101101970,101116267,101111593,101102865,443312,101118104,101113828,101114042,101120785,100145863,101106877,101123672,101113259,101108710
GO:0061134	peptidase regulator activity	molecular_function	0.14388	1	32	3149	165	20255	101113828,101118104,101114042,443312,101102865,101113259,101108710,100145863,101120785,101123672,101106877,105606875,101113311,101101855,101117532,101107904,101115175,443392,101104518,101104772,101104205,100217407,101104001,780471,101105017,101103901,101111593,101116142,101101970,101116267,101115287,101111287
GO:0016705	oxidoreductase activity, acting on paired donors, with incorporation or reduction of molecular oxygen	molecular_function	0.14397	1	38	3149	192	20255	101116287,101106985,105604882,101103439,101105114,101122809,101105610,101121880,105613870,101115028,443077,767576,100568289,100170113,101106641,101114222,101102402,101119364,101110351,100534653,101104703,101109214,101102377,101120054,101121015,100505404,101118441,105612707,106992010,101109018,101105651,101109471,101119021,101121924,101122521,101106474,443533,101112384
GO:0004719	protein-L-isoaspartate (D-aspartate) O-methyltransferase activity	molecular_function	0.14467	1	7	3149	28	20255	1.0111e+62
GO:0008544	epidermis development	biological_process	0.14486	1	5	3149	20	20255	1.01122e+44
GO:0050660	flavin adenine dinucleotide binding	molecular_function	0.14585	1	18	3149	82	20255	1.01112e+161
GO:0016052	carbohydrate catabolic process	biological_process	0.14641	1	13	3149	59	20255	4.43085e+107
GO:0008417	fucosyltransferase activity	molecular_function	0.14643	1	4	3149	13	20255	1.01109e+35
GO:0006855	drug transmembrane transport	biological_process	0.14715	1	4	3149	13	20255	1.01109e+35
GO:0015238	drug transmembrane transporter activity	molecular_function	0.14715	1	4	3149	13	20255	1.01109e+35
GO:0015893	drug transport	biological_process	0.14715	1	4	3149	13	20255	1.01109e+35
GO:0090484	drug transporter activity	molecular_function	0.14715	1	4	3149	13	20255	1.01109e+35
GO:0003707	steroid hormone receptor activity	molecular_function	0.14763	1	6	3149	23	20255	1.01106e+50
GO:0008289	lipid binding	molecular_function	0.14857	1	52	3149	277	20255	101110687,101120532,101107113,101120924,101106256,101118911,101113123,101112696,101117273,101110739,101105566,101118328,101108766,101114720,101113276,101118240,101106373,101121264,101115266,101117487,101109783,100125621,101107298,101105809,101121163,106992022,101117014,100125354,105616741,101109430,101116005,101121414,101120011,101119948,100820755,101102945,101120760,101121870,101118731,101109752…
GO:0004536	deoxyribonuclease activity	molecular_function	0.14866	1	32	3149	163	20255	100145862,101105772,101115870,101107783,101109895,101106367,101108719,101123086,101104145,101106170,101117014,101117886,101121974,101105836,101112077,101119830,101105493,101120777,101109602,101114621,101106373,101102923,101120243,101117160,101104153,101103211,105605702,101106022,101111593,106990245,101121988,101118095
GO:0032504	multicellular organism reproduction	biological_process	0.15095	1	27	3149	140	20255	105601924,101118372,101108788,101123025,101108799,101120384,101115414,100885767,101114421,101104246,101109126,101101974,101110365,101112876,101104674,105610024,101113775,101106848,101109063,100302356,101108877,101118862,101110722,101103083,101108428,101113866,101104023
GO:0019208	phosphatase regulator activity	molecular_function	0.15098	1	5	3149	18	20255	1.01102e+44
GO:0044798	nuclear transcription factor complex	cellular_component	0.15185	1	13	3149	66	20255	1.01102e+116
GO:0006836	neurotransmitter transport	biological_process	0.15346	1	8	3149	32	20255	1.01105e+71
GO:0098589	membrane region	cellular_component	0.15374	1	5	3149	18	20255	1.01117e+41
GO:0032555	purine ribonucleotide binding	molecular_function	0.1561	1	343	3149	2006	20255	100141297,101109076,101106609,101114773,101117304,101111480,101117582,101101964,101105624,101113029,101121256,101108844,101113048,101108782,101103525,100101233,101109481,101114993,101103804,101106209,101118911,101115819,101116267,101113085,101119252,101113802,101122169,100037690,101104530,101114472,100147795,101120327,101113378,101119042,101115555,101114815,101115047,101112991,101109873,105605969…
GO:0009452	7-methylguanosine RNA capping	biological_process	0.15611	1	6	3149	23	20255	1.01118e+53
GO:0036260	RNA capping	biological_process	0.15611	1	6	3149	23	20255	1.01122e+53
GO:0005540	hyaluronic acid binding	molecular_function	0.15712	1	6	3149	22	20255	1.01103e+53
GO:0009291	unidirectional conjugation	biological_process	0.15737	1	1	3149	1	20255	101112597
GO:0051184	cofactor transporter activity	molecular_function	0.15841	1	4	3149	13	20255	1.01108e+35
GO:0009036	Type II site-specific deoxyribonuclease activity	molecular_function	0.15853	1	6	3149	22	20255	1.05606e+53
GO:0015666	restriction endodeoxyribonuclease activity	molecular_function	0.15853	1	6	3149	22	20255	1.01103e+53
GO:0019783	ubiquitin-like protein-specific protease activity	molecular_function	0.15978	1	7	3149	29	20255	1.01107e+62
GO:0017176	phosphatidylinositol N-acetylglucosaminyltransferase activity	molecular_function	0.16227	1	3	3149	9	20255	5.41609e+23
GO:0003906	DNA-(apurinic or apyrimidinic site) lyase activity	molecular_function	0.16269	1	3	3149	9	20255	1.01121e+26
GO:0020037	heme binding	molecular_function	0.16285	1	32	3149	172	20255	101105114,101102928,105604882,101103439,100307038,101106985,105613870,101106199,101103925,101119315,101105610,767576,101105185,101106452,100568289,100170113,101106641,101109214,101102377,100534653,101104703,106992010,101105651,101118441,101105437,105612707,101108535,443533,101112384,101116408,101103006,101122521
GO:0004866	endopeptidase inhibitor activity	molecular_function	0.16299	1	25	3149	127	20255	1.01105e+215
GO:0061135	endopeptidase regulator activity	molecular_function	0.16299	1	25	3149	127	20255	1.01115e+215
GO:0006508	proteolysis	biological_process	0.16477	1	166	3149	955	20255	101118332,101102257,101122483,101110255,101116408,101121487,100505402,101110464,101108609,101115834,780471,101113105,101105907,101110797,101109116,101119580,101107749,101115174,105614591,101107461,101106834,101118624,101114312,105612922,105609190,106991457,101102765,101113003,101116449,101116249,105604861,101121971,101108473,100302096,101121298,101112445,101102553,100144429,101122304,101110364,10…
GO:0004518	nuclease activity	molecular_function	0.16492	1	67	3149	369	20255	101120777,101110951,101109602,105615685,105605676,101117125,101112077,101102923,106991649,101109754,105608895,105605702,101106022,101111593,101106603,101104017,101103211,101105406,101118095,101116260,101108823,101115870,101107783,105611408,100145862,101105772,105616123,101117012,101123086,101106353,101109087,101107995,101121974,101105493,101119830,101121962,101105836,101120243,101114621,101106373…
GO:0016787	hydrolase activity	molecular_function	0.16495	1	582	3149	3454	20255	101112445,101111009,101120179,101107783,100144429,101122304,101107806,101117755,101116249,101108473,101102765,101122850,105612922,101114312,101106160,101105117,101117125,101110797,101118666,101106333,101116194,101109419,101110951,101102354,101107533,101121487,101113475,101108609,780471,100302308,101102923,101112735,101104055,101103211,101115463,101120713,101113132,101114535,101115254,100302343,10…
GO:0043087	regulation of GTPase activity	biological_process	0.16613	1	6	3149	22	20255	1.0111e+53
GO:0048309	endoplasmic reticulum inheritance	biological_process	0.16676	1	4	3149	13	20255	1.01108e+35
GO:0007281	germ cell development	biological_process	0.16731	1	13	3149	61	20255	1.01104e+116
GO:0044430	cytoskeletal part	cellular_component	0.16804	1	83	3149	469	20255	101104153,101107427,101108536,101122671,101102997,101110356,101111791,101117378,100141296,101115341,101121536,101113816,101116087,101104657,101105836,106990161,101112716,101117175,100526780,101108798,101118887,106990888,101112094,101120243,101102760,100526782,101103655,101117934,101115558,101106557,100141297,101123647,101103234,101111271,101103677,101123619,101112429,101111605,101117550,101104467…
GO:0010383	cell wall polysaccharide metabolic process	biological_process	0.16844	1	2	3149	5	20255	1.01113e+17
GO:0010410	hemicellulose metabolic process	biological_process	0.16844	1	2	3149	5	20255	1.01109e+17
GO:0045491	xylan metabolic process	biological_process	0.16844	1	2	3149	5	20255	1.01113e+17
GO:0045493	xylan catabolic process	biological_process	0.16844	1	2	3149	5	20255	1.01109e+17
GO:0046559	alpha-glucuronidase activity	molecular_function	0.16844	1	2	3149	5	20255	1.01113e+17
GO:0035639	purine ribonucleoside triphosphate binding	molecular_function	0.16886	1	341	3149	1999	20255	101114145,101121324,101109648,101111916,100302077,101123073,101122460,101112260,101103918,101103928,101112234,101121529,101107428,101123343,106991125,101111351,101107523,101108506,101110495,101118915,101117606,101117561,101103190,101110437,101111723,101107765,101106860,100171396,101115382,101108370,105605158,101110900,101104154,101109460,101116218,101104719,101105786,101121391,100302745,101119070…
GO:0005509	calcium ion binding	molecular_function	0.16973	1	100	3149	555	20255	443369,101118313,101121668,101112591,101108201,101118911,101110367,101111411,101111598,105614079,105610921,101113181,101114377,101106077,100462743,101106868,101102185,101119193,101106863,101105293,101104136,101115917,101103359,101113215,101102480,101108293,101111889,101117580,101123376,101106588,101104023,101103256,101118998,101104794,101113966,101114659,101108443,105601932,101108412,101103198,10…
GO:0044702	single organism reproductive process	biological_process	0.16983	1	29	3149	154	20255	101108435,101104023,101108428,101101879,101110722,101113866,101118862,101105963,100302356,101108877,101109063,101106848,105610024,101113775,101112876,101104674,101104246,101114421,101115414,100885767,101110365,101101974,101109126,101108799,101123025,101120384,105601924,101108788,101118372
GO:0015276	ligand-gated ion channel activity	molecular_function	0.16986	1	30	3149	153	20255	101110253,101110444,101102337,101122859,101102707,101115663,101123662,101113104,101105420,101113565,101119004,101110406,101117462,101102915,101116428,101121330,101114065,101120360,101123388,101104736,101110267,101114135,101108715,101112591,101116998,101122747,101122539,101110429,101110363,101108392
GO:0022834	ligand-gated channel activity	molecular_function	0.16986	1	30	3149	153	20255	101114135,101108715,101112591,101122747,101122539,101116998,101110429,101110363,101108392,101114065,101121330,101116428,101120360,101123388,101104736,101110267,101119004,101110406,101117462,101102915,101110253,101110444,101122859,101102337,101102707,101115663,101123662,101113104,101113565,101105420
GO:0008140	cAMP response element binding protein binding	molecular_function	0.17034	1	1	3149	1	20255	101102117
GO:0051289	protein homotetramerization	biological_process	0.17034	1	1	3149	1	20255	101102117
GO:0005985	sucrose metabolic process	biological_process	0.17061	1	2	3149	5	20255	1.01109e+17
GO:0005986	sucrose biosynthetic process	biological_process	0.17061	1	2	3149	5	20255	1.01108e+17
GO:0050307	sucrose-phosphate phosphatase activity	molecular_function	0.17061	1	2	3149	5	20255	1.01108e+17
GO:0016730	oxidoreductase activity, acting on iron-sulfur proteins as donors	molecular_function	0.17071	1	3	3149	9	20255	1.01106e+26
GO:0009277	fungal-type cell wall	cellular_component	0.17078	1	1	3149	1	20255	101106403
GO:0051818	disruption of cells of other organism involved in symbiotic interaction	biological_process	0.17226	1	4	3149	13	20255	4.43087e+32
GO:0051883	killing of cells in other organism involved in symbiotic interaction	biological_process	0.17226	1	4	3149	13	20255	1.01113e+32
GO:0005768	endosome	cellular_component	0.17227	1	4	3149	14	20255	1.01113e+32
GO:0044440	endosomal part	cellular_component	0.17227	1	4	3149	14	20255	1.01111e+32
GO:0048518	positive regulation of biological process	biological_process	0.17267	1	65	3149	362	20255	101116168,101102047,101119023,101106095,101114962,101111605,101109630,101104678,101110363,101102198,101109076,101121163,100307039,101114662,101102185,100192423,101106774,101105398,101108987,101114502,106991750,101118942,101102584,105608817,101115898,101111791,105610921,101108814,101116087,101104173,101115304,100305130,101105772,101119818,101107783,105602068,101112704,101113585,105601913,101119070…
GO:0043461	proton-transporting ATP synthase complex assembly	biological_process	0.17275	1	1	3149	1	20255	101111895
GO:0070272	proton-transporting ATP synthase complex biogenesis	biological_process	0.17275	1	1	3149	1	20255	101111895
GO:0004126	cytidine deaminase activity	molecular_function	0.17284	1	1	3149	1	20255	101102378
GO:0006216	cytidine catabolic process	biological_process	0.17284	1	1	3149	1	20255	101102378
GO:0009164	nucleoside catabolic process	biological_process	0.17284	1	1	3149	1	20255	101102378
GO:0009972	cytidine deamination	biological_process	0.17284	1	1	3149	1	20255	101102378
GO:0042454	ribonucleoside catabolic process	biological_process	0.17284	1	1	3149	1	20255	101102378
GO:0046087	cytidine metabolic process	biological_process	0.17284	1	1	3149	1	20255	101102378
GO:0046133	pyrimidine ribonucleoside catabolic process	biological_process	0.17284	1	1	3149	1	20255	101102378
GO:0046135	pyrimidine nucleoside catabolic process	biological_process	0.17284	1	1	3149	1	20255	101102378
GO:0072529	pyrimidine-containing compound catabolic process	biological_process	0.17284	1	1	3149	1	20255	101102378
GO:1901658	glycosyl compound catabolic process	biological_process	0.17284	1	1	3149	1	20255	101102378
GO:0008900	hydrogen:potassium-exchanging ATPase activity	molecular_function	0.17285	1	1	3149	1	20255	101116166
GO:0009820	alkaloid metabolic process	biological_process	0.17287	1	1	3149	1	20255	101102664
GO:0050364	tryptophan dimethylallyltransferase activity	molecular_function	0.17287	1	1	3149	1	20255	101102664
GO:0003978	UDP-glucose 4-epimerase activity	molecular_function	0.17287	1	1	3149	1	20255	101103362
GO:0004061	arylformamidase activity	molecular_function	0.17287	1	1	3149	1	20255	101103696
GO:0006282	regulation of DNA repair	biological_process	0.17287	1	1	3149	1	20255	101111530
GO:0006538	glutamate catabolic process	biological_process	0.17287	1	1	3149	1	20255	101106567
GO:0009294	DNA mediated transformation	biological_process	0.17287	1	1	3149	1	20255	106991510
GO:0015562	efflux transmembrane transporter activity	molecular_function	0.17287	1	1	3149	1	20255	101120350
GO:0015708	silicate transport	biological_process	0.17287	1	1	3149	1	20255	101117821
GO:0019211	phosphatase activator activity	molecular_function	0.17287	1	1	3149	1	20255	101105403
GO:0019670	anaerobic glutamate catabolic process	biological_process	0.17287	1	1	3149	1	20255	101106567
GO:0030420	establishment of competence for transformation	biological_process	0.17287	1	1	3149	1	20255	106991510
GO:0030699	glycine reductase activity	molecular_function	0.17287	1	1	3149	1	20255	100135692
GO:0030700	glycine reductase complex	cellular_component	0.17287	1	1	3149	1	20255	100135692
GO:0034639	L-amino acid efflux transmembrane transporter activity	molecular_function	0.17287	1	1	3149	1	20255	101120350
GO:0043649	dicarboxylic acid catabolic process	biological_process	0.17287	1	1	3149	1	20255	101106567
GO:0046537	2,3-bisphosphoglycerate-independent phosphoglycerate mutase activity	molecular_function	0.17287	1	1	3149	1	20255	101114411
GO:0046992	oxidoreductase activity, acting on X-H and Y-H to form an X-Y bond	molecular_function	0.17287	1	1	3149	1	20255	100135692
GO:0050097	methylaspartate mutase activity	molecular_function	0.17287	1	1	3149	1	20255	101106567
GO:0050215	propanediol dehydratase activity	molecular_function	0.17287	1	1	3149	1	20255	101115235
GO:0050485	oxidoreductase activity, acting on X-H and Y-H to form an X-Y bond, with a disulfide as acceptor	molecular_function	0.17287	1	1	3149	1	20255	100135692
GO:0080135	regulation of cellular response to stress	biological_process	0.17287	1	1	3149	1	20255	101111530
GO:2001020	regulation of response to DNA damage stimulus	biological_process	0.17287	1	1	3149	1	20255	101111530
GO:0052636	arabinosyltransferase activity	molecular_function	0.17287	1	1	3149	1	20255	101110286
GO:0071766	Actinobacterium-type cell wall biogenesis	biological_process	0.17287	1	1	3149	1	20255	101110286
GO:0008939	nicotinate-nucleotide-dimethylbenzimidazole phosphoribosyltransferase activity	molecular_function	0.17287	1	1	3149	1	20255	101105203
GO:0039624	viral outer capsid	cellular_component	0.17287	1	1	3149	1	20255	101117891
GO:0070008	serine-type exopeptidase activity	molecular_function	0.1733	1	12	3149	54	20255	1.0111e+101
GO:0005496	steroid binding	molecular_function	0.17393	1	6	3149	24	20255	1.01115e+50
GO:0048609	multicellular organismal reproductive process	biological_process	0.17487	1	25	3149	130	20255	1.01114e+224
GO:0031419	cobalamin binding	molecular_function	0.17648	1	3	3149	9	20255	1.01117e+26
GO:0009110	vitamin biosynthetic process	biological_process	0.17671	1	10	3149	44	20255	1.01105e+89
GO:0042364	water-soluble vitamin biosynthetic process	biological_process	0.17671	1	10	3149	44	20255	1.01107e+89
GO:0003824	catalytic activity	molecular_function	0.17686	1	1265	3149	7663	20255	101123238,101117632,101105428,101122937,101104678,101113510,101105032,101114524,101121358,101116287,100036759,101110832,101104422,101114505,101116998,101116097,101120216,443533,101107829,101106565,101109808,101105876,101115150,101114421,101120532,641296,101117115,101111598,101102863,105609660,101104592,101107719,780507,101110953,101102185,101103393,105608969,101110047,101121197,101116181,10010122…
GO:0005516	calmodulin binding	molecular_function	0.17692	1	9	3149	39	20255	1.01118e+77
GO:0001883	purine nucleoside binding	molecular_function	0.17741	1	341	3149	2002	20255	101113048,101108782,101103525,101121256,101108844,101114993,100101233,101109481,101106609,101114773,101117304,100141297,101109076,101101964,101105624,101113029,101111480,101117582,100037690,101104530,101114472,101122169,101113802,101114815,101120327,100147795,101113378,101115555,101119042,101118911,101103804,101106209,101116267,101113085,101119252,101115819,101103725,101108691,101105420,101119743…
GO:0032549	ribonucleoside binding	molecular_function	0.17741	1	341	3149	2002	20255	101105763,101117519,101103094,101120485,101103124,101110575,101119807,101106367,101116999,101122739,100036759,101105428,497272,101113739,101120491,101107029,101107561,101103653,101120665,101114662,101102185,780507,100145880,105608969,101116166,100101228,101110526,101123382,101104335,101116097,101116998,101115707,101109874,105609617,101109232,101112590,101104173,101113972,101117115,101106773,10110…
GO:0032550	purine ribonucleoside binding	molecular_function	0.17741	1	341	3149	2002	20255	101120899,101102402,101112720,101115047,101112991,101109873,105605969,101114396,101121677,101119743,101105529,100135438,101108691,101105420,101103725,101120259,105604182,101123191,101116607,101119091,101103539,101115220,101113963,100885761,101122778,101113997,101105602,106990131,101118025,101119215,101110626,101115097,105614852,101120590,101105127,101110857,101121788,101113846,101110186,101109813…
GO:0043385	mycotoxin metabolic process	biological_process	0.17851	1	2	3149	5	20255	1.0112e+17
GO:0043386	mycotoxin biosynthetic process	biological_process	0.17851	1	2	3149	5	20255	1.06992e+17
GO:0045122	aflatoxin biosynthetic process	biological_process	0.17851	1	2	3149	5	20255	1.06992e+17
GO:0046222	aflatoxin metabolic process	biological_process	0.17851	1	2	3149	5	20255	1.06992e+17
GO:1901376	organic heteropentacyclic compound metabolic process	biological_process	0.17851	1	2	3149	5	20255	1.06992e+17
GO:1901378	organic heteropentacyclic compound biosynthetic process	biological_process	0.17851	1	2	3149	5	20255	1.0112e+17
GO:0051539	4 iron, 4 sulfur cluster binding	molecular_function	0.1789	1	4	3149	14	20255	1.01107e+35
GO:0017048	Rho GTPase binding	molecular_function	0.17913	1	5	3149	19	20255	1.01123e+44
GO:0010646	regulation of cell communication	biological_process	0.17921	1	45	3149	239	20255	101123376,101119743,101102047,101107175,101112992,443005,101113436,101112704,101123030,101108865,101115486,101106095,101106288,101122356,101106156,101110137,101118115,101112995,101105381,101107150,101105172,101121163,101115645,101101937,101116437,105606875,101114662,101123259,101103527,101115893,101110030,101116876,101107664,101104720,101106603,101109808,101105923,101107544,101122121,101110410,10…
GO:0001533	cornified envelope	cellular_component	0.18053	1	3	3149	12	20255	1.05611e+26
GO:0070011	peptidase activity, acting on L-amino acid peptides	molecular_function	0.18215	1	168	3149	971	20255	101114871,101103413,101108227,101113485,101104761,101105076,101118320,780470,101120263,101104740,443151,105607877,101118241,100127211,101102270,101123643,101112260,101112755,101108614,101104198,101116503,101119791,101123582,101122311,101110301,101116386,101109460,101118613,101108865,101104453,100913169,443027,101110306,443348,101117450,101121793,101115179,101119187,101102635,101108923,101115707,1…
GO:0017080	sodium channel regulator activity	molecular_function	0.18245	1	9	3149	39	20255	1.05602e+80
GO:0019871	sodium channel inhibitor activity	molecular_function	0.18245	1	9	3149	39	20255	1.01103e+80
GO:0044431	Golgi apparatus part	cellular_component	0.18264	1	19	3149	93	20255	1.01114e+170
GO:0009085	lysine biosynthetic process	biological_process	0.18293	1	4	3149	15	20255	1.01118e+32
GO:0009089	lysine biosynthetic process via diaminopimelate	biological_process	0.18293	1	4	3149	15	20255	4.43005e+32
GO:0046451	diaminopimelate metabolic process	biological_process	0.18293	1	4	3149	15	20255	1.01114e+32
GO:0006536	glutamate metabolic process	biological_process	0.18315	1	3	3149	9	20255	1.01115e+26
GO:0009896	positive regulation of catabolic process	biological_process	0.18357	1	15	3149	71	20255	1.01112e+134
GO:0010508	positive regulation of autophagy	biological_process	0.18357	1	15	3149	71	20255	1.01103e+134
GO:0031331	positive regulation of cellular catabolic process	biological_process	0.18357	1	15	3149	71	20255	1.0111e+134
GO:0042301	phosphate ion binding	molecular_function	0.18379	1	3	3149	10	20255	1.01113e+26
GO:0007129	synapsis	biological_process	0.18511	1	3	3149	9	20255	1.01114e+26
GO:0007130	synaptonemal complex assembly	biological_process	0.18511	1	3	3149	9	20255	1.01116e+26
GO:0045143	homologous chromosome segregation	biological_process	0.18511	1	3	3149	9	20255	1.05602e+26
GO:0070192	chromosome organization involved in meiosis	biological_process	0.18511	1	3	3149	9	20255	1.01116e+26
GO:0070193	synaptonemal complex organization	biological_process	0.18511	1	3	3149	9	20255	1.05602e+26
GO:0043414	macromolecule methylation	biological_process	0.18532	1	16	3149	78	20255	1.01124e+143
GO:0023051	regulation of signaling	biological_process	0.18538	1	45	3149	240	20255	101122356,101118115,101112995,101110137,101106156,101105172,101105381,101107150,101115645,101121163,101119743,101123376,101107175,101102047,101113436,443005,101112704,101112992,101106288,101123030,101108865,101115486,101106095,101105923,101107544,101109808,101106603,101104720,101110410,101122121,101121702,101111598,101107354,101104173,101112448,101101937,101123259,101114662,105606875,101116437,10…
GO:0005381	iron ion transmembrane transporter activity	molecular_function	0.1856	1	19	3149	95	20255	1.01122e+170
GO:0045088	regulation of innate immune response	biological_process	0.18691	1	2	3149	5	20255	1.01114e+17
GO:0003995	acyl-CoA dehydrogenase activity	molecular_function	0.18734	1	6	3149	23	20255	1.01114e+53
GO:0019363	pyridine nucleotide biosynthetic process	biological_process	0.18869	1	4	3149	14	20255	1.01116e+35
GO:0000279	M phase	biological_process	0.18901	1	8	3149	34	20255	1.01113e+71
GO:0022403	cell cycle phase	biological_process	0.18901	1	8	3149	34	20255	1.06991e+71
GO:0044848	biological phase	biological_process	0.18901	1	8	3149	34	20255	1.01113e+71
GO:0004511	tyrosine 3-monooxygenase activity	molecular_function	0.19006	1	4	3149	14	20255	1.01102e+35
GO:0001897	cytolysis by symbiont of host cells	biological_process	0.19034	1	3	3149	9	20255	1.01113e+23
GO:0019836	hemolysis by symbiont of host erythrocytes	biological_process	0.19034	1	3	3149	9	20255	1.01113e+23
GO:0008233	peptidase activity	molecular_function	0.19075	1	179	3149	1038	20255	101119791,101116503,101110301,101122311,101123582,101108614,101104198,100913169,101104453,443027,101109460,101116386,101107383,101108865,101118613,101108227,101118915,101103413,101104761,101105076,101113485,101114871,101123643,101112755,101112260,101104740,101120263,780470,101118320,101118241,101102270,100127211,101105838,105607877,443151,101118814,101112250,105614286,101117415,105607037,10112205…
GO:0098599	palmitoyl hydrolase activity	molecular_function	0.19156	1	2	3149	5	20255	1.01108e+17
GO:0045944	positive regulation of transcription from RNA polymerase II promoter	biological_process	0.19204	1	7	3149	31	20255	1.01112e+62
GO:0006825	copper ion transport	biological_process	0.19236	1	6	3149	26	20255	1.01123e+53
GO:0001882	nucleoside binding	molecular_function	0.1924	1	342	3149	2013	20255	101120665,101107561,101103653,101107029,101113739,101120491,497272,101105428,101122739,101116999,100036759,101106367,101119807,101110575,101103124,101120485,101103094,101105763,101117519,101106773,101103793,101114525,101117115,101113972,101112645,101104173,105609617,101109874,101115707,101112590,101109232,101123382,101104335,101116998,101116097,101110526,100101228,105608969,101116166,100145880,78…
GO:0051321	meiotic cell cycle	biological_process	0.19285	1	10	3149	44	20255	1.01107e+89
GO:0005524	ATP binding	molecular_function	0.19329	1	291	3149	1690	20255	101112597,101120569,101119327,101116802,101115161,101113866,101108182,101116114,101109754,101122598,101109637,101108361,101112132,101122822,101110274,101118723,106991387,101121112,101111010,101121302,101111607,101108429,101114460,101109385,101105090,101109312,101108266,101110196,101109430,101121208,101117245,101117721,101110150,101110490,443415,101110620,101115580,101114662,780507,100145880,10560…
GO:0005664	nuclear origin of replication recognition complex	cellular_component	0.19343	1	3	3149	10	20255	1.0111e+26
GO:0006289	nucleotide-excision repair	biological_process	0.19558	1	7	3149	29	20255	1.01121e+62
GO:0005742	mitochondrial outer membrane translocase complex	cellular_component	0.19611	1	7	3149	30	20255	1.01105e+62
GO:0060478	acrosomal vesicle exocytosis	biological_process	0.1964	1	2	3149	6	20255	1.00302e+17
GO:0006766	vitamin metabolic process	biological_process	0.19678	1	10	3149	45	20255	1.01107e+89
GO:0006767	water-soluble vitamin metabolic process	biological_process	0.19678	1	10	3149	45	20255	1.01105e+89
GO:0000808	origin recognition complex	cellular_component	0.19853	1	4	3149	15	20255	1.01122e+35
GO:0044765	single-organism transport	biological_process	0.19861	1	366	3149	2163	20255	101114721,101107145,101110363,101122747,101110429,101115303,101107484,100526782,101114005,101120011,101121163,101114715,101114270,100145863,101107733,101110004,101103679,101111271,101114909,101104552,101108142,101102707,101110357,101111129,101112591,101107427,101113636,105603946,101118435,101117208,101123422,101120924,101116107,101102611,100141296,101115063,101113461,101116562,101106442,101118622…
GO:0044815	DNA packaging complex	cellular_component	0.19896	1	9	3149	45	20255	1.01106e+80
GO:0005261	cation channel activity	molecular_function	0.19919	1	43	3149	232	20255	101112587,101102362,100170326,101113317,780477,101119004,101110406,101109587,101102128,101119497,101104736,101108864,101105267,101116428,101110429,101120562,101120711,101114673,101113830,101108392,101110363,101114005,101117260,101111476,101115663,100302624,443488,101110253,101122859,101118126,101102337,101104978,101121535,101123388,101106663,101108302,101122960,101105917,101116998,105606102,10111…
GO:0032993	protein-DNA complex	cellular_component	0.19964	1	9	3149	45	20255	1.01109e+80
GO:0006368	transcription elongation from RNA polymerase II promoter	biological_process	0.20013	1	10	3149	47	20255	1.01115e+89
GO:0006733	oxidoreduction coenzyme metabolic process	biological_process	0.20017	1	12	3149	56	20255	1.01103e+98
GO:0005244	voltage-gated ion channel activity	molecular_function	0.20131	1	23	3149	118	20255	1.01122e+203
GO:0022832	voltage-gated channel activity	molecular_function	0.20131	1	23	3149	118	20255	1.01102e+203
GO:0009894	regulation of catabolic process	biological_process	0.20166	1	25	3149	129	20255	1.01107e+224
GO:0006370	7-methylguanosine mRNA capping	biological_process	0.20199	1	3	3149	10	20255	1.01116e+26
GO:0004550	nucleoside diphosphate kinase activity	molecular_function	0.20215	1	3	3149	10	20255	1.0111e+26
GO:0006183	GTP biosynthetic process	biological_process	0.20215	1	3	3149	10	20255	1.0111e+26
GO:0006228	UTP biosynthetic process	biological_process	0.20215	1	3	3149	10	20255	1.0111e+26
GO:0006241	CTP biosynthetic process	biological_process	0.20215	1	3	3149	10	20255	1.0111e+26
GO:0009148	pyrimidine nucleoside triphosphate biosynthetic process	biological_process	0.20215	1	3	3149	10	20255	1.0111e+26
GO:0009208	pyrimidine ribonucleoside triphosphate metabolic process	biological_process	0.20215	1	3	3149	10	20255	1.01112e+26
GO:0009209	pyrimidine ribonucleoside triphosphate biosynthetic process	biological_process	0.20215	1	3	3149	10	20255	1.0111e+26
GO:0046036	CTP metabolic process	biological_process	0.20215	1	3	3149	10	20255	1.0111e+26
GO:0046039	GTP metabolic process	biological_process	0.20215	1	3	3149	10	20255	1.0111e+26
GO:0046051	UTP metabolic process	biological_process	0.20215	1	3	3149	10	20255	1.01112e+26
GO:0046132	pyrimidine ribonucleoside biosynthetic process	biological_process	0.20215	1	3	3149	10	20255	1.0111e+26
GO:0046134	pyrimidine nucleoside biosynthetic process	biological_process	0.20215	1	3	3149	10	20255	1.01112e+26
GO:0003012	muscle system process	biological_process	0.20314	1	3	3149	10	20255	1.01115e+26
GO:0006936	muscle contraction	biological_process	0.20314	1	3	3149	10	20255	1.01115e+26
GO:0006937	regulation of muscle contraction	biological_process	0.20314	1	3	3149	10	20255	1.01106e+26
GO:0006939	smooth muscle contraction	biological_process	0.20314	1	3	3149	10	20255	1.01115e+26
GO:0006940	regulation of smooth muscle contraction	biological_process	0.20314	1	3	3149	10	20255	1.01115e+26
GO:0090257	regulation of muscle system process	biological_process	0.20314	1	3	3149	10	20255	1.01115e+26
GO:0032559	adenyl ribonucleotide binding	molecular_function	0.20328	1	291	3149	1693	20255	101116303,101123415,101110124,101115036,101113737,101112939,101106688,101107484,101115303,101108956,100302302,101110121,101118799,101108293,101115680,101107205,101115612,101123008,101114290,443087,101104774,101111271,443156,443454,101103936,101120064,100145873,101120069,101112063,101119918,101108142,101108239,101122564,101113850,101106564,101121386,101102849,101120780,101115897,101122783,10111771…
GO:0034599	cellular response to oxidative stress	biological_process	0.20412	1	2	3149	5	20255	1.01121e+17
GO:0042995	cell projection	cellular_component	0.20413	1	28	3149	148	20255	101113102,105602053,101112476,101106728,101108770,101112429,101116205,101114973,101123650,101111312,101111271,101109602,101107574,101105836,101123647,101116874,101116107,101111010,101111791,101122546,101109430,101114674,101102584,101119381,101112735,105612424,101110495,101111755
GO:0017076	purine nucleotide binding	molecular_function	0.20464	1	345	3149	2036	20255	101111852,101109789,105606135,101115027,101119457,101111117,101121088,101103562,101122959,101121554,101104881,101103677,101119686,780519,101108572,101118731,101112429,101114356,101114544,101105623,101119979,101115931,101112608,101114265,101113412,101107841,443453,101115179,101108923,101116087,101109779,101116568,101102997,100526780,101122604,101112932,101120826,101107621,101107882,101108969,10111…
GO:0004484	mRNA guanylyltransferase activity	molecular_function	0.20472	1	3	3149	10	20255	1.01114e+26
GO:0030234	enzyme regulator activity	molecular_function	0.2052	1	80	3149	457	20255	101120785,100145863,101105403,101105404,101103077,101113259,101108710,101108748,101122156,100216435,100302083,101108806,101108447,101102015,101113828,101114042,101118104,101110406,443312,101112448,101116087,101115287,101115341,101121484,101119250,105612424,101116267,101104001,101114717,101115844,101104446,101103901,105606875,101111683,101101855,101117532,101107904,101101937,443392,101115175,10110…
GO:0006305	DNA alkylation	biological_process	0.20527	1	3	3149	10	20255	1.01116e+26
GO:0006306	DNA methylation	biological_process	0.20527	1	3	3149	10	20255	1.01122e+26
GO:0044728	DNA methylation or demethylation	biological_process	0.20527	1	3	3149	10	20255	1.01122e+26
GO:0005856	cytoskeleton	cellular_component	0.2054	1	88	3149	504	20255	101123647,101111271,101103234,101103677,101123619,101112429,101111605,101108844,101104467,101117550,100526782,101103655,101117934,101115558,101106557,100141297,101105836,101117175,106990161,101112716,101108798,100526780,101114431,101118887,106990888,101112094,101102760,101120243,101104153,101108536,101107427,101122671,101111791,101110356,101102997,100141296,101117378,101121536,101113816,101115341…
GO:0015932	nucleobase-containing compound transmembrane transporter activity	molecular_function	0.206	1	6	3149	24	20255	1.01118e+53
GO:0009966	regulation of signal transduction	biological_process	0.20655	1	43	3149	231	20255	101110030,101115893,101103527,101107664,101116876,101101937,101123259,105606875,101114662,101116437,101121702,101107354,101111598,101104173,101112448,101105923,101107544,101106603,101104720,101110410,101122121,101113436,443005,101112704,101112992,101106288,101115486,101123030,101108865,101106095,101119743,101123376,101107175,101102047,101105172,101107150,101105381,101115645,101122356,101112995,10…
GO:0008028	monocarboxylic acid transmembrane transporter activity	molecular_function	0.20666	1	2	3149	5	20255	1.01105e+17
GO:0015128	gluconate transmembrane transporter activity	molecular_function	0.20666	1	2	3149	5	20255	1.01105e+17
GO:0042873	aldonate transport	biological_process	0.20666	1	2	3149	5	20255	1.01105e+17
GO:0042879	aldonate transmembrane transporter activity	molecular_function	0.20666	1	2	3149	5	20255	1.01105e+17
GO:0006012	galactose metabolic process	biological_process	0.2068	1	3	3149	10	20255	1.01118e+26
GO:0034061	DNA polymerase activity	molecular_function	0.20742	1	24	3149	125	20255	1.01117e+215
GO:0007128	meiotic prophase I	biological_process	0.20824	1	2	3149	5	20255	1.01116e+17
GO:0051324	prophase	biological_process	0.20824	1	2	3149	5	20255	1.01116e+17
GO:0098762	meiotic cell cycle phase	biological_process	0.20824	1	2	3149	5	20255	1.05602e+17
GO:0098764	meiosis I cell cycle phase	biological_process	0.20824	1	2	3149	5	20255	1.01116e+17
GO:0004318	enoyl-[acyl-carrier-protein] reductase (NADH) activity	molecular_function	0.20829	1	2	3149	5	20255	1.05602e+17
GO:0006084	acetyl-CoA metabolic process	biological_process	0.20829	1	2	3149	5	20255	1.01123e+17
GO:0006637	acyl-CoA metabolic process	biological_process	0.20829	1	2	3149	5	20255	1.01123e+17
GO:0035383	thioester metabolic process	biological_process	0.20829	1	2	3149	5	20255	1.01102e+17
GO:0019031	viral envelope	cellular_component	0.20875	1	47	3149	262	20255	101118731,101114931,101108719,101108770,101112476,101112967,101118393,101118957,101106727,100141297,101110050,101113510,101110490,101117014,100294614,101109430,101115558,101106605,101103943,100526782,101111995,101114977,101107769,101122784,101105271,101122048,101103527,101110526,101109602,101119030,101110219,100526785,101118112,101109933,101111916,101114377,443489,101112716,101117175,101111791,10…
GO:0036338	viral membrane	cellular_component	0.20875	1	47	3149	262	20255	101118731,101108719,101114931,101108770,101112476,101112967,101118393,101118957,101106727,100141297,101113510,101110050,101110490,101117014,100294614,101115558,101109430,101106605,101103943,100526782,101111995,101114977,101107769,101105271,101122784,101122048,101110526,101103527,101110219,101119030,101109602,100526785,101118112,101111916,101109933,101114377,101112716,443489,101117175,101111791,10…
GO:0007167	enzyme linked receptor protein signaling pathway	biological_process	0.20875	1	8	3149	34	20255	1.01121e+65
GO:0007169	transmembrane receptor protein tyrosine kinase signaling pathway	biological_process	0.20875	1	8	3149	34	20255	7.80519e+65
GO:0043169	cation binding	molecular_function	0.2092	1	576	3149	3444	20255	100037684,101107812,101106877,494443,101102951,105605821,101112390,101117092,101120760,100820736,100302745,101123572,101109460,101112704,101107051,101104441,101111171,101122970,101110900,101102386,101103063,101118894,105608491,101116491,101103190,101116797,101104761,100127220,105605702,101115392,101103859,100302099,101113447,100307044,101120263,105606081,101104264,101121324,105605676,101110667,10…
GO:0004519	endonuclease activity	molecular_function	0.20929	1	32	3149	173	20255	101106367,105616123,101108719,101114247,101115870,101106305,105604166,101107995,101121974,101106170,105613453,101123086,101120680,101109087,106991649,101114621,105608895,101105493,101119830,101120777,105615685,105605676,443453,101118095,101108823,101111053,101108771,105605702,101104017,101116203,101103211,101105406
GO:0042325	regulation of phosphorylation	biological_process	0.20969	1	7	3149	30	20255	1.01115e+62
GO:0005242	inward rectifier potassium channel activity	molecular_function	0.21137	1	6	3149	25	20255	1.01123e+53
GO:0005861	troponin complex	cellular_component	0.21159	1	3	3149	10	20255	1.01104e+26
GO:0005865	striated muscle thin filament	cellular_component	0.21159	1	3	3149	10	20255	1.01104e+26
GO:0030016	myofibril	cellular_component	0.21159	1	3	3149	10	20255	1.01103e+26
GO:0030017	sarcomere	cellular_component	0.21159	1	3	3149	10	20255	1.0561e+26
GO:0036379	myofilament	cellular_component	0.21159	1	3	3149	10	20255	1.01103e+26
GO:0043292	contractile fiber	cellular_component	0.21159	1	3	3149	10	20255	1.01104e+26
GO:0044449	contractile fiber part	cellular_component	0.21159	1	3	3149	10	20255	1.01103e+26
GO:0003724	RNA helicase activity	molecular_function	0.21192	1	16	3149	79	20255	1.01114e+143
GO:0016888	endodeoxyribonuclease activity, producing 5'-phosphomonoesters	molecular_function	0.21223	1	8	3149	34	20255	1.01103e+71
GO:0031647	regulation of protein stability	biological_process	0.21268	1	3	3149	11	20255	1.01115e+26
GO:0050821	protein stabilization	biological_process	0.21268	1	3	3149	11	20255	1.01113e+26
GO:0016485	protein processing	biological_process	0.21338	1	16	3149	80	20255	1.01122e+143
GO:0051604	protein maturation	biological_process	0.21338	1	16	3149	80	20255	1.01105e+143
GO:0044093	positive regulation of molecular function	biological_process	0.21356	1	7	3149	30	20255	1.01112e+62
GO:0031225	anchored component of membrane	cellular_component	0.21407	1	3	3149	10	20255	1.01105e+26
GO:0032561	guanyl ribonucleotide binding	molecular_function	0.2144	1	95	3149	556	20255	100302745,101103725,101117755,101104154,101112406,101121677,101117328,101116859,101109385,101114396,101108554,101108370,105605158,101104195,101115580,101121976,101109873,101109534,101120899,101123290,100147794,105601843,101104887,101102612,105614852,101108182,100302308,101120590,101115097,101123118,101115484,101109813,101110857,101121529,101107117,101117520,101116194,101118025,101103928,100302077…
GO:0016591	DNA-directed RNA polymerase II, holoenzyme	cellular_component	0.21662	1	19	3149	105	20255	1.01103e+170
GO:0019239	deaminase activity	molecular_function	0.21792	1	5	3149	20	20255	1.01118e+44
GO:0004675	transmembrane receptor protein serine/threonine kinase activity	molecular_function	0.21884	1	9	3149	43	20255	1.01113e+74
GO:0022836	gated channel activity	molecular_function	0.21958	1	50	3149	274	20255	101102707,101110444,101102362,101105420,101113104,101123662,101112587,101109587,101117462,101102915,101110406,101119004,780477,101111209,101114065,101121330,101116428,101104736,101117260,101114673,101108392,101110363,101110429,101122747,101122539,101120711,101102337,101122859,101115453,100302624,101110253,101113565,101111476,101115663,101121535,101111082,101104978,101105917,101120360,101122960,10…
GO:0042600	chorion	cellular_component	0.21967	1	17	3149	87	20255	1.00886e+152
GO:0045861	negative regulation of proteolysis	biological_process	0.21969	1	10	3149	48	20255	1.0112e+86
GO:0070403	NAD+ binding	molecular_function	0.22023	1	3	3149	10	20255	1.01108e+26
GO:0019001	guanyl nucleotide binding	molecular_function	0.2205	1	95	3149	557	20255	101115097,101123118,101115484,105614852,101102612,101108182,100302308,101120590,101121529,101110857,101109813,101117520,101116194,101107117,101103928,101118025,101119215,101106333,100302077,106991387,101122778,101113997,101105602,101111607,101112132,101103539,101122822,100302745,101117755,101103725,101114396,101108554,101104154,101121677,101117328,101112406,101116859,101109385,101108370,105605158…
GO:0005784	Sec61 translocon complex	cellular_component	0.22084	1	3	3149	10	20255	1.05615e+26
GO:0071256	translocon complex	cellular_component	0.22084	1	3	3149	10	20255	1.01115e+26
GO:0006553	lysine metabolic process	biological_process	0.22116	1	4	3149	16	20255	1.01118e+32
GO:0019953	sexual reproduction	biological_process	0.22331	1	31	3149	169	20255	101104674,101110306,101112876,101109126,101101974,101110365,101115414,100885767,101114421,101104246,101120384,101123025,101108799,101117582,101118372,101108788,105601924,101104023,101108435,101113866,101110722,101103083,101108428,101108877,100302356,101118862,101105963,105610024,101113775,101106848,101109063
GO:0044703	multi-organism reproductive process	biological_process	0.22331	1	31	3149	169	20255	101104023,101108435,101113866,101108428,101103083,101110722,101105963,101118862,100302356,101108877,101106848,101109063,105610024,101113775,101104674,101112876,101110306,101101974,101110365,101109126,101104246,101115414,101114421,100885767,101120384,101108799,101123025,101108788,101118372,101117582,105601924
GO:0046872	metal ion binding	molecular_function	0.22386	1	572	3149	3426	20255	101116516,101114377,101106868,100462743,101106442,101105559,101120424,101117625,101111693,101111476,101104136,101115839,105606101,101114034,101116176,101103994,101109994,101102611,101115287,101115197,101118862,101104774,101106305,101109113,101106588,101102015,101119939,101119538,101119918,101114897,101111837,101115486,101108443,101114499,101113302,101103711,101120155,101105235,101116534,101108330…
GO:0004019	adenylosuccinate synthase activity	molecular_function	0.22514	1	2	3149	6	20255	1.01113e+17
GO:0006558	L-phenylalanine metabolic process	biological_process	0.22529	1	2	3149	6	20255	1.06992e+17
GO:1902221	erythrose 4-phosphate/phosphoenolpyruvate family amino acid metabolic process	biological_process	0.22529	1	2	3149	6	20255	1.01124e+17
GO:0008537	proteasome activator complex	cellular_component	0.22533	1	3	3149	11	20255	1.01121e+26
GO:0022624	proteasome accessory complex	cellular_component	0.22533	1	3	3149	11	20255	1.01117e+26
GO:0070925	organelle assembly	biological_process	0.22613	1	21	3149	111	20255	1.05606e+188
GO:0044421	extracellular region part	cellular_component	0.22795	1	60	3149	335	20255	101111598,101109471,101113261,101120979,101111010,101110367,101109165,101108297,101122564,101114784,101114953,101116142,101111755,101104153,101121484,101121668,443206,101106373,101108609,101108346,101116184,101108855,780505,101120243,101106490,101103859,101115915,100127216,101105159,101109602,101111507,101122954,101123672,101117014,101116580,101104541,101107485,101105541,101109630,101104709,10019…
GO:0007631	feeding behavior	biological_process	0.22946	1	4	3149	16	20255	1.01123e+35
GO:0004386	helicase activity	molecular_function	0.231	1	39	3149	213	20255	101105763,101120064,101109385,101119686,101105090,101121256,101117517,101123290,105601843,101119457,101117014,101110620,101120327,101113378,101122604,101102343,101117713,101108182,101113802,101121529,101107428,101113475,101106546,101106373,101116097,101112132,101117606,101105623,100820750,101115254,101114265,101107111,101103804,101107765,100135439,101120780,101106193,101111607,101113997
GO:1902578	single-organism localization	biological_process	0.23121	1	372	3149	2210	20255	105613829,101103562,101105267,101112901,101117113,101105120,100170326,101105069,101114356,101108719,101122020,101108586,101118731,101111605,101117462,780519,101122962,101105917,101120572,101112696,101104534,101118606,101116568,101112448,101111925,101115327,101107779,101115304,101108923,105604604,101104153,101114135,101121516,101122065,101116360,101115931,101112608,101123476,101110253,100302624,10…
GO:0005217	intracellular ligand-gated ion channel activity	molecular_function	0.23229	1	7	3149	32	20255	1.01102e+62
GO:0005218	intracellular ligand-gated calcium channel activity	molecular_function	0.23229	1	7	3149	32	20255	1.0111e+62
GO:0005219	ryanodine-sensitive calcium-release channel activity	molecular_function	0.23229	1	7	3149	32	20255	1.01123e+62
GO:0006874	cellular calcium ion homeostasis	biological_process	0.23229	1	7	3149	32	20255	1.0111e+62
GO:0015278	calcium-release channel activity	molecular_function	0.23229	1	7	3149	32	20255	1.01113e+62
GO:0055074	calcium ion homeostasis	biological_process	0.23229	1	7	3149	32	20255	1.0111e+62
GO:0072503	cellular divalent inorganic cation homeostasis	biological_process	0.23229	1	7	3149	32	20255	1.0111e+62
GO:0072507	divalent inorganic cation homeostasis	biological_process	0.23229	1	7	3149	32	20255	1.01117e+62
GO:0016835	carbon-oxygen lyase activity	molecular_function	0.23233	1	20	3149	103	20255	1.01104e+179
GO:0043093	FtsZ-dependent cytokinesis	biological_process	0.23286	1	17	3149	89	20255	1.05612e+149
GO:0034508	centromere complex assembly	biological_process	0.23309	1	10	3149	50	20255	1.01105e+89
GO:0031329	regulation of cellular catabolic process	biological_process	0.23362	1	24	3149	126	20255	1.01104e+215
GO:0015749	monosaccharide transport	biological_process	0.23532	1	4	3149	15	20255	1.01105e+35
GO:0030131	clathrin adaptor complex	cellular_component	0.23534	1	4	3149	16	20255	1.01122e+35
GO:0010181	FMN binding	molecular_function	0.23558	1	6	3149	26	20255	4.43533e+47
GO:0032787	monocarboxylic acid metabolic process	biological_process	0.23874	1	25	3149	132	20255	1.00505e+215
GO:0046351	disaccharide biosynthetic process	biological_process	0.23879	1	2	3149	6	20255	1.01109e+17
GO:0016569	covalent chromatin modification	biological_process	0.23905	1	9	3149	41	20255	1.01123e+80
GO:0016570	histone modification	biological_process	0.23905	1	9	3149	41	20255	1.01116e+80
GO:0051801	cytolysis in other organism involved in symbiotic interaction	biological_process	0.23944	1	3	3149	10	20255	1.01113e+23
GO:0052331	hemolysis in other organism involved in symbiotic interaction	biological_process	0.23944	1	3	3149	10	20255	1.01106e+23
GO:0008172	S-methyltransferase activity	molecular_function	0.23953	1	5	3149	20	20255	1.01117e+44
GO:0002097	tRNA wobble base modification	biological_process	0.24138	1	3	3149	11	20255	1.01113e+26
GO:0002098	tRNA wobble uridine modification	biological_process	0.24138	1	3	3149	11	20255	1.01113e+26
GO:0005942	phosphatidylinositol 3-kinase complex	cellular_component	0.2418	1	4	3149	16	20255	1.01115e+35
GO:0005944	phosphatidylinositol 3-kinase complex, class IB	cellular_component	0.2418	1	4	3149	16	20255	1.0111e+35
GO:0035014	phosphatidylinositol 3-kinase regulator activity	molecular_function	0.2418	1	4	3149	16	20255	1.01116e+35
GO:0046935	1-phosphatidylinositol-3-kinase regulator activity	molecular_function	0.2418	1	4	3149	16	20255	1.01116e+35
GO:0097651	phosphatidylinositol 3-kinase complex, class I	cellular_component	0.2418	1	4	3149	16	20255	1.01116e+35
GO:0016903	oxidoreductase activity, acting on the aldehyde or oxo group of donors	molecular_function	0.24252	1	10	3149	52	20255	1.01114e+86
GO:0008907	integrase activity	molecular_function	0.24393	1	2	3149	6	20255	1.05612e+17
GO:0010604	positive regulation of macromolecule metabolic process	biological_process	0.24406	1	22	3149	117	20255	1.01115e+197
GO:0006270	DNA replication initiation	biological_process	0.24457	1	16	3149	85	20255	1.01116e+143
GO:0009307	DNA restriction-modification system	biological_process	0.24471	1	6	3149	25	20255	1.05606e+53
GO:0044355	clearance of foreign intracellular DNA	biological_process	0.24471	1	6	3149	25	20255	1.05606e+53
GO:0016818	hydrolase activity, acting on acid anhydrides, in phosphorus-containing anhydrides	molecular_function	0.24679	1	168	3149	986	20255	101103906,101117606,101112132,101110495,101108506,101110274,101107765,106991387,101111723,101111607,101111010,101102343,100302077,101119327,101109648,101108182,106991125,101106546,101107428,101121529,101123290,101109430,101110043,105601843,101108614,101110490,101102890,101104195,101115580,101110620,443415,101104154,101109385,101117328,101108554,101108370,100913169,101105090,105605158,101123382,10…
GO:0009317	acetyl-CoA carboxylase complex	cellular_component	0.24749	1	2	3149	6	20255	1.01106e+17
GO:0016301	kinase activity	molecular_function	0.24749	1	186	3149	1083	20255	101120665,101105018,101122959,497272,101105428,101111852,101109789,101112429,101114356,101116999,101122739,101117519,101103094,101104881,101103124,101110575,780519,443453,101115179,101109779,101103793,101104592,101102072,101108520,101115478,105609660,101102863,101106773,101112270,101119979,101109232,101106474,101104446,101111612,101118124,101115422,101114662,101114069,780507,101120826,105608969,1…
GO:0000428	DNA-directed RNA polymerase complex	cellular_component	0.24812	1	20	3149	113	20255	1.05607e+179
GO:0030880	RNA polymerase complex	cellular_component	0.24812	1	20	3149	113	20255	1.01105e+179
GO:0055029	nuclear DNA-directed RNA polymerase complex	cellular_component	0.24812	1	20	3149	113	20255	1.0112e+179
GO:0048585	negative regulation of response to stimulus	biological_process	0.24875	1	8	3149	38	20255	1.01122e+71
GO:0019842	vitamin binding	molecular_function	0.24901	1	9	3149	42	20255	1.01123e+80
GO:0032784	regulation of DNA-templated transcription, elongation	biological_process	0.24925	1	6	3149	28	20255	1.0111e+53
GO:0001510	RNA methylation	biological_process	0.25002	1	9	3149	43	20255	1.0112e+80
GO:0008192	RNA guanylyltransferase activity	molecular_function	0.25052	1	3	3149	11	20255	1.01114e+26
GO:0070568	guanylyltransferase activity	molecular_function	0.25052	1	3	3149	11	20255	1.01114e+26
GO:0048037	cofactor binding	molecular_function	0.25056	1	65	3149	364	20255	101115897,101111883,101121015,101112882,101120780,101105533,101118708,101116107,101105876,101112590,443533,101114115,101115552,101121924,101121876,101118731,100190978,101117173,101121880,101108052,101111818,101108066,101121554,101110109,101113856,101117514,101114318,101116173,101113789,101106859,101115684,100145857,101117632,101117113,101114222,101103527,101108191,101107035,101113161,443211,10110…
GO:0043085	positive regulation of catalytic activity	biological_process	0.25057	1	6	3149	26	20255	1.01123e+53
GO:0015103	inorganic anion transmembrane transporter activity	molecular_function	0.25094	1	8	3149	37	20255	1.01111e+71
GO:0072525	pyridine-containing compound biosynthetic process	biological_process	0.25167	1	4	3149	16	20255	1.01116e+35
GO:0004003	ATP-dependent DNA helicase activity	molecular_function	0.25172	1	7	3149	33	20255	1.01107e+62
GO:0002532	production of molecular mediator involved in inflammatory response	biological_process	0.25305	1	2	3149	6	20255	1.01109e+17
GO:0004896	cytokine receptor activity	molecular_function	0.25305	1	2	3149	6	20255	1.01123e+17
GO:0017016	Ras GTPase binding	molecular_function	0.25373	1	8	3149	37	20255	1.01123e+71
GO:0031267	small GTPase binding	molecular_function	0.25373	1	8	3149	37	20255	1.01122e+71
GO:0051020	GTPase binding	molecular_function	0.25373	1	8	3149	37	20255	1.01122e+71
GO:0042626	ATPase activity, coupled to transmembrane movement of substances	molecular_function	0.25464	1	23	3149	121	20255	1.0111e+206
GO:0043492	ATPase activity, coupled to movement of substances	molecular_function	0.25464	1	23	3149	121	20255	1.01109e+206
GO:0044283	small molecule biosynthetic process	biological_process	0.25467	1	41	3149	231	20255	101117520,105604785,101120130,106991756,101109735,105610504,101106373,101107679,101105271,101103906,101108201,101116797,105616433,101118372,101106474,443369,101121516,101120379,101102295,105610921,101115341,101102594,101112818,106992004,101111009,101122299,101110406,101113687,101120920,101105203,101121164,101112411,443005,101111834,101111894,101123345,101106859,101110490,101114524,101114318,10111…
GO:0016655	oxidoreductase activity, acting on NAD(P)H, quinone or similar compound as acceptor	molecular_function	0.2548	1	13	3149	66	20255	1.0112e+116
GO:0004000	adenosine deaminase activity	molecular_function	0.2551	1	3	3149	11	20255	1.01118e+26
GO:0070567	cytidylyltransferase activity	molecular_function	0.25516	1	2	3149	6	20255	1.01122e+17
GO:0009252	peptidoglycan biosynthetic process	biological_process	0.25519	1	1	3149	2	20255	101104081
GO:0017069	snRNA binding	molecular_function	0.25656	1	2	3149	6	20255	1.01114e+17
GO:0010565	regulation of cellular ketone metabolic process	biological_process	0.25701	1	1	3149	2	20255	101121554
GO:0019216	regulation of lipid metabolic process	biological_process	0.25701	1	1	3149	2	20255	101121554
GO:0019217	regulation of fatty acid metabolic process	biological_process	0.25701	1	1	3149	2	20255	101121554
GO:0016137	glycoside metabolic process	biological_process	0.25711	1	1	3149	2	20255	101109735
GO:0016138	glycoside biosynthetic process	biological_process	0.25711	1	1	3149	2	20255	101109735
GO:0050504	mannosyl-3-phosphoglycerate synthase activity	molecular_function	0.25711	1	1	3149	2	20255	101109735
GO:0051478	mannosylglycerate metabolic process	biological_process	0.25711	1	1	3149	2	20255	101109735
GO:0051479	mannosylglycerate biosynthetic process	biological_process	0.25711	1	1	3149	2	20255	101109735
GO:0019627	urea metabolic process	biological_process	0.25726	1	1	3149	2	20255	101120949
GO:0090150	establishment of protein localization to membrane	biological_process	0.25752	1	16	3149	82	20255	1.01107e+143
GO:0030976	thiamine pyrophosphate binding	molecular_function	0.25798	1	5	3149	21	20255	1.01122e+44
GO:0016679	oxidoreductase activity, acting on diphenols and related substances as donors	molecular_function	0.25903	1	12	3149	59	20255	1.06991e+107
GO:0003905	alkylbase DNA N-glycosylase activity	molecular_function	0.25958	1	2	3149	6	20255	1.01122e+17
GO:0030162	regulation of proteolysis	biological_process	0.26009	1	13	3149	67	20255	1.01122e+113
GO:0019236	response to pheromone	biological_process	0.26041	1	2	3149	6	20255	1.01105e+17
GO:0019685	photosynthesis, dark reaction	biological_process	0.2605	1	2	3149	6	20255	1.01115e+17
GO:0000275	mitochondrial proton-transporting ATP synthase complex, catalytic core F(1)	cellular_component	0.26079	1	3	3149	11	20255	1.01118e+26
GO:0009065	glutamine family amino acid catabolic process	biological_process	0.26215	1	1	3149	2	20255	101106567
GO:0006310	DNA recombination	biological_process	0.26217	1	36	3149	198	20255	101104887,101123025,101107484,101117087,101105449,101110620,101111209,101105090,101109113,101121964,101109980,101120739,101103808,101107628,101116425,101109444,101105623,101112132,101115254,101107300,101111607,101105602,101104173,101121988,101111819,101116925,101122604,101113378,101123545,101106072,100037690,101113475,101120100,101113866,101113802,101113090
GO:0031347	regulation of defense response	biological_process	0.26231	1	4	3149	16	20255	1.01119e+35
GO:0005525	GTP binding	molecular_function	0.26259	1	93	3149	552	20255	101119252,105609617,101112590,101112608,101115931,101104335,101123382,101116998,101116568,101118911,101103804,101109548,101107621,100145880,101112932,101116551,101102185,101115555,101111683,100147795,101110526,101106774,101104530,101112350,100037690,101122169,101105877,100101228,101114005,101115303,100302302,101103562,101107561,101115027,101110004,101120485,100101233,101107592,101103525,100145873…
GO:0048522	positive regulation of cellular process	biological_process	0.26296	1	56	3149	321	20255	101109076,101121163,101109873,101110363,101108206,101106073,101102198,101109630,101115946,101104678,101123030,101119070,101106095,101121971,101106288,101114962,101111739,101111605,101112704,101119023,101113585,101102047,101119818,101107783,101105772,105610921,101108814,101116087,101115304,101104173,101113261,101111791,100820750,101102584,101120440,101122886,101114784,101118942,101103211,101107544…
GO:0005388	calcium-transporting ATPase activity	molecular_function	0.26352	1	2	3149	6	20255	1.01102e+17
GO:0030554	adenyl nucleotide binding	molecular_function	0.26396	1	293	3149	1723	20255	101119807,101103124,101110575,101103094,101117519,101105763,101122739,101116999,100036759,101113739,101120491,101105428,497272,101120665,101107561,101103653,101107029,105608969,101116166,100145880,780507,101114662,105612424,101115707,101109874,101109232,101116097,101106773,101103793,101114525,101117115,101113972,101104173,101105090,101114460,101109385,101108429,101108266,101109312,101121208,10110…
GO:0004619	phosphoglycerate mutase activity	molecular_function	0.26437	1	1	3149	2	20255	101114411
GO:0006555	methionine metabolic process	biological_process	0.26438	1	2	3149	6	20255	1.01117e+17
GO:0016893	endonuclease activity, active with either ribo- or deoxyribonucleic acids and producing 5'-phosphomonoesters	molecular_function	0.26502	1	19	3149	101	20255	1.05606e+170
GO:0030119	AP-type membrane coat adaptor complex	cellular_component	0.26533	1	5	3149	22	20255	1.01123e+44
GO:0006367	transcription initiation from RNA polymerase II promoter	biological_process	0.26698	1	12	3149	62	20255	1.01121e+107
GO:0008772	[isocitrate dehydrogenase (NADP+)] kinase activity	molecular_function	0.26867	1	1	3149	2	20255	101106255
GO:0005337	nucleoside transmembrane transporter activity	molecular_function	0.2689	1	4	3149	16	20255	1.01107e+35
GO:0016459	myosin complex	cellular_component	0.26963	1	12	3149	57	20255	1.0111e+107
GO:0015098	molybdate ion transmembrane transporter activity	molecular_function	0.27082	1	1	3149	2	20255	101106278
GO:0015689	molybdate ion transport	biological_process	0.27082	1	1	3149	2	20255	101106278
GO:0006072	glycerol-3-phosphate metabolic process	biological_process	0.27133	1	3	3149	11	20255	1.01113e+26
GO:0046168	glycerol-3-phosphate catabolic process	biological_process	0.27133	1	3	3149	11	20255	1.01119e+26
GO:0005758	mitochondrial intermembrane space	cellular_component	0.27157	1	2	3149	7	20255	1.01113e+17
GO:0016530	metallochaperone activity	molecular_function	0.27157	1	2	3149	7	20255	1.01113e+17
GO:0016531	copper chaperone activity	molecular_function	0.27157	1	2	3149	7	20255	1.01104e+17
GO:0031970	organelle envelope lumen	cellular_component	0.27157	1	2	3149	7	20255	1.01113e+17
GO:0036459	ubiquitinyl hydrolase activity	molecular_function	0.27157	1	14	3149	71	20255	1.01115e+125
GO:0016593	Cdc73/Paf1 complex	cellular_component	0.27171	1	4	3149	16	20255	1.01105e+35
GO:0016579	protein deubiquitination	biological_process	0.27206	1	13	3149	65	20255	1.0112e+116
GO:0070646	protein modification by small protein removal	biological_process	0.27206	1	13	3149	65	20255	1.0112e+116
GO:0000346	transcription export complex	cellular_component	0.27227	1	4	3149	17	20255	1.01107e+35
GO:0000445	THO complex part of transcription export complex	cellular_component	0.27227	1	4	3149	17	20255	1.01107e+35
GO:0034637	cellular carbohydrate biosynthetic process	biological_process	0.27253	1	7	3149	33	20255	1.0112e+62
GO:1901363	heterocyclic compound binding	molecular_function	0.27306	1	922	3149	5707	20255	101122784,101109754,101105271,101118126,101106899,101103527,101106277,101120682,101110798,101113866,101103865,100036761,101116114,101116802,101119327,101112597,101116437,101121112,101103450,101111010,101119487,101109471,101121302,106992010,101118723,106991387,101106603,101112132,101109312,101109919,101119973,101119818,101103925,101109385,443415,101111209,101110620,101117245,101117721,101114330,10…
GO:0007205	protein kinase C-activating G-protein coupled receptor signaling pathway	biological_process	0.27311	1	3	3149	11	20255	1.01115e+26
GO:0016765	transferase activity, transferring alkyl or aryl (other than methyl) groups	molecular_function	0.27319	1	10	3149	49	20255	1.05611e+89
GO:0008770	[acyl-carrier-protein] phosphodiesterase activity	molecular_function	0.27329	1	1	3149	2	20255	101111009
GO:0055070	copper ion homeostasis	biological_process	0.27449	1	1	3149	2	20255	101119521
GO:0071554	cell wall organization or biogenesis	biological_process	0.2755	1	6	3149	29	20255	1.01109e+53
GO:0097159	organic cyclic compound binding	molecular_function	0.27553	1	922	3149	5708	20255	101123660,101110159,101102612,101113343,101112535,101113081,101110640,101123118,101109116,554264,101120777,101107117,101117520,101113252,101116260,101110637,101104261,101121544,101107113,101122886,105606265,101109464,100307043,101103006,105612523,101104799,101123551,101114240,101106288,101105174,101114917,101103751,101119535,101112406,101103696,101110452,101121976,101109534,101107106,101101873,10…
GO:0008924	malate dehydrogenase (quinone) activity	molecular_function	0.27562	1	2	3149	6	20255	1.01114e+17
GO:0032040	small-subunit processome	cellular_component	0.27631	1	15	3149	79	20255	1.01118e+134
GO:0017111	nucleoside-triphosphatase activity	molecular_function	0.27745	1	155	3149	915	20255	101109548,101120327,101113378,101115555,101116551,101117713,101120424,101106774,101112094,101111693,101106373,101122169,101113802,101119252,101122564,101120780,101107510,101103804,101116107,101106209,101120064,101110004,101115297,101103525,101108142,101121256,101108844,101117550,101114005,101115303,101117582,101123155,101117014,101106609,101108293,100302302,101109076,101119215,101109116,101106333…
GO:0090305	nucleic acid phosphodiester bond hydrolysis	biological_process	0.27773	1	2	3149	6	20255	101106353641296
GO:0047961	glycine N-acyltransferase activity	molecular_function	0.27814	1	2	3149	6	20255	1.01109e+17
GO:0000795	synaptonemal complex	cellular_component	0.27818	1	2	3149	6	20255	1.05602e+17
GO:0009295	nucleoid	cellular_component	0.27823	1	2	3149	6	20255	1.01104e+17
GO:0008081	phosphoric diester hydrolase activity	molecular_function	0.27861	1	15	3149	75	20255	1.01116e+134
GO:0055114	oxidation-reduction process	biological_process	0.27914	1	212	3149	1260	20255	100846985,101104678,101119364,101114867,101117632,101117113,101114222,101115330,101117415,101114702,100568289,101114318,101114524,101104150,767576,101117580,101105267,101112942,101119969,101113427,101110604,101113943,101121880,101108826,101123619,101105610,101113508,100190978,101113952,101116287,101118731,101115644,443533,101106474,101115150,101105876,101121484,101112388,105609660,101113101,10110…
GO:0080134	regulation of response to stress	biological_process	0.27938	1	8	3149	38	20255	1.01114e+71
GO:0048308	organelle inheritance	biological_process	0.27994	1	4	3149	16	20255	1.01108e+35
GO:0015629	actin cytoskeleton	cellular_component	0.28055	1	19	3149	99	20255	1.0699e+170
GO:0008661	1-deoxy-D-xylulose-5-phosphate synthase activity	molecular_function	0.28085	1	2	3149	7	20255	1.00146e+17
GO:0016744	transferase activity, transferring aldehyde or ketonic groups	molecular_function	0.28085	1	2	3149	7	20255	1.00146e+17
GO:0003677	DNA binding	molecular_function	0.28091	1	400	3149	2468	20255	101116073,101119303,101110490,443415,101114532,101110620,101111209,101109430,101118969,101106667,106990985,101115210,101105072,101108668,100422803,101105154,101119818,105610024,101108429,101116952,101115870,101119556,101119973,101109919,101118963,101118723,101116077,101119487,101111010,101103450,101121112,101111607,105616429,101109471,105611393,101112132,101110274,101113251,101119414,101106603,10…
GO:0005891	voltage-gated calcium channel complex	cellular_component	0.2813	1	3	3149	11	20255	1.01123e+26
GO:0034704	calcium channel complex	cellular_component	0.2813	1	3	3149	11	20255	1.01111e+26
GO:0009627	systemic acquired resistance	biological_process	0.28141	1	1	3149	2	20255	101114005
GO:0009814	defense response, incompatible interaction	biological_process	0.28141	1	1	3149	2	20255	101114005
GO:0010112	regulation of systemic acquired resistance	biological_process	0.28141	1	1	3149	2	20255	101114005
GO:0004859	phospholipase inhibitor activity	molecular_function	0.28188	1	2	3149	8	20255	1.01109e+17
GO:0055102	lipase inhibitor activity	molecular_function	0.28188	1	2	3149	8	20255	1.01109e+17
GO:0010648	negative regulation of cell communication	biological_process	0.28205	1	6	3149	28	20255	1.01112e+53
GO:0023057	negative regulation of signaling	biological_process	0.28205	1	6	3149	28	20255	1.01112e+53
GO:0005786	signal recognition particle, endoplasmic reticulum targeting	cellular_component	0.28251	1	1	3149	2	20255	101106535
GO:0030942	endoplasmic reticulum signal peptide binding	molecular_function	0.28251	1	1	3149	2	20255	101106535
GO:0032505	reproduction of a single-celled organism	biological_process	0.28289	1	17	3149	92	20255	1.01103e+149
GO:0030269	tetrahydromethanopterin S-methyltransferase activity	molecular_function	0.28328	1	4	3149	16	20255	1.0699e+35
GO:0042086	5-methyl-5,6,7,8-tetrahydromethanopterin-dependent methyltransferase activity	molecular_function	0.28328	1	4	3149	16	20255	1.0699e+35
GO:0015145	monosaccharide transmembrane transporter activity	molecular_function	0.28348	1	1	3149	2	20255	101117115
GO:0015149	hexose transmembrane transporter activity	molecular_function	0.28348	1	1	3149	2	20255	101117115
GO:0015153	rhamnose transmembrane transporter activity	molecular_function	0.28348	1	1	3149	2	20255	101117115
GO:0048646	anatomical structure formation involved in morphogenesis	biological_process	0.28377	1	18	3149	96	20255	1.01114e+161
GO:0019888	protein phosphatase regulator activity	molecular_function	0.28509	1	4	3149	17	20255	1.01102e+35
GO:0006721	terpenoid metabolic process	biological_process	0.28523	1	7	3149	33	20255	1.01122e+62
GO:0016114	terpenoid biosynthetic process	biological_process	0.28523	1	7	3149	33	20255	1.0112e+62
GO:0008901	ferredoxin hydrogenase activity	molecular_function	0.28553	1	1	3149	2	20255	101109464
GO:0016699	oxidoreductase activity, acting on hydrogen as donor, iron-sulfur protein as acceptor	molecular_function	0.28553	1	1	3149	2	20255	101109464
GO:0009056	catabolic process	biological_process	0.28591	1	116	3149	680	20255	101108392,101110196,101113586,101109430,101109087,101116424,101102779,101123429,101109254,101107091,100037684,101121166,101104195,101121671,101120419,101111821,106990803,101109873,101103925,101120041,101103696,101123650,101107783,100913169,101105772,101118613,100302096,101109127,101114931,101111670,101116872,101119858,101116449,105602053,101113585,101120440,101105833,101105406,101116408,101114475…
GO:0033014	tetrapyrrole biosynthetic process	biological_process	0.28659	1	15	3149	77	20255	1.01121e+134
GO:0008705	methionine synthase activity	molecular_function	0.28697	1	1	3149	2	20255	101116797
GO:0042084	5-methyltetrahydrofolate-dependent methyltransferase activity	molecular_function	0.28697	1	1	3149	2	20255	101116797
GO:0006354	DNA-templated transcription, elongation	biological_process	0.28899	1	10	3149	51	20255	1.01115e+89
GO:0016597	amino acid binding	molecular_function	0.28912	1	4	3149	17	20255	1.01102e+35
GO:0044781	bacterial-type flagellum organization	biological_process	0.2905	1	5	3149	22	20255	1.01107e+44
GO:0098799	outer mitochondrial membrane protein complex	cellular_component	0.2927	1	7	3149	34	20255	1.01105e+62
GO:0003774	motor activity	molecular_function	0.29272	1	27	3149	143	20255	101113963,101106209,101110050,101116107,101109076,101102997,101121088,101106609,101104261,101102890,101111723,101115463,101108506,101115220,101122564,101117550,101108844,101121529,101106728,101112429,101107533,101112094,101121554,101120179,101113252,101109602,101119327
GO:0015296	anion:cation symporter activity	molecular_function	0.29412	1	4	3149	16	20255	1.01105e+35
GO:0043623	cellular protein complex assembly	biological_process	0.29508	1	55	3149	318	20255	101102010,101115558,101111895,101109430,101119909,105607318,101122954,101117014,101103607,101122962,101107783,101111271,101113427,101105557,780519,101114931,101110938,101106839,101114292,101119023,443005,101118913,101112429,101107297,101120440,101121484,101122564,105606265,101111755,101122886,101114953,101111863,101104153,101117047,101116087,101111925,101119486,101110637,101109471,101103799,10111…
GO:0044272	sulfur compound biosynthetic process	biological_process	0.29634	1	9	3149	43	20255	1.01109e+80
GO:0044802	single-organism membrane organization	biological_process	0.29666	1	29	3149	162	20255	101114715,101107561,101104246,101116568,101115580,101113997,101113132,101123290,101115931,101104887,101105877,101114381,101108182,101122048,101109895,101105503,101110526,101106535,101106774,101107228,105614591,101119308,101107633,101120777,101114662,100302356,101107621,101118296,101110694
GO:0022610	biological adhesion	biological_process	0.29712	1	69	3149	394	20255	101119023,101112429,101116999,101118998,101121164,105616904,101108443,101123376,101122041,101106120,101117462,101106727,101110170,100192433,654333,101106232,101103359,101102480,101120947,105605705,101103009,101105659,101114226,101110943,101118112,101118996,101106077,101114377,101102185,101112696,101107351,101115341,101121988,101113636,101107427,101103343,101102230,101118313,101111090,106991247,10…
GO:0009066	aspartate family amino acid metabolic process	biological_process	0.29784	1	6	3149	29	20255	1.01112e+50
GO:0018759	methenyltetrahydromethanopterin cyclohydrolase activity	molecular_function	0.29848	1	1	3149	2	20255	101108788
GO:0006890	retrograde vesicle-mediated transport, Golgi to ER	biological_process	0.30011	1	2	3149	7	20255	1.0112e+17
GO:0000086	G2/M transition of mitotic cell cycle	biological_process	0.3014	1	1	3149	2	20255	101110255
GO:0010389	regulation of G2/M transition of mitotic cell cycle	biological_process	0.3014	1	1	3149	2	20255	101110255
GO:0010972	negative regulation of G2/M transition of mitotic cell cycle	biological_process	0.3014	1	1	3149	2	20255	101110255
GO:0030336	negative regulation of cell migration	biological_process	0.3014	1	1	3149	2	20255	101110255
GO:0044839	cell cycle G2/M phase transition	biological_process	0.3014	1	1	3149	2	20255	101110255
GO:1902749	regulation of cell cycle G2/M phase transition	biological_process	0.3014	1	1	3149	2	20255	101110255
GO:1902750	negative regulation of cell cycle G2/M phase transition	biological_process	0.3014	1	1	3149	2	20255	101110255
GO:0015297	antiporter activity	molecular_function	0.30201	1	8	3149	38	20255	4.94435e+68
GO:0047396	glycosylphosphatidylinositol diacylglycerol-lyase activity	molecular_function	0.30244	1	3	3149	12	20255	1.01122e+26
GO:0004748	ribonucleoside-diphosphate reductase activity, thioredoxin disulfide as acceptor	molecular_function	0.30306	1	2	3149	7	20255	1.01122e+17
GO:0061731	ribonucleoside-diphosphate reductase activity	molecular_function	0.30306	1	2	3149	7	20255	1.01108e+17
GO:0050080	malonyl-CoA decarboxylase activity	molecular_function	0.30323	1	1	3149	2	20255	101122299
GO:0070071	proton-transporting two-sector ATPase complex assembly	biological_process	0.30494	1	3	3149	14	20255	1.01122e+26
GO:0040029	regulation of gene expression, epigenetic	biological_process	0.30541	1	3	3149	12	20255	1.01122e+26
GO:0015718	monocarboxylic acid transport	biological_process	0.3056	1	5	3149	23	20255	1.01117e+44
GO:0004725	protein tyrosine phosphatase activity	molecular_function	0.30632	1	20	3149	106	20255	1.01121e+179
GO:0016638	oxidoreductase activity, acting on the CH-NH2 group of donors	molecular_function	0.30683	1	11	3149	58	20255	1.01117e+98
GO:0003919	FMN adenylyltransferase activity	molecular_function	0.30706	1	1	3149	2	20255	101113687
GO:0008115	sarcosine oxidase activity	molecular_function	0.30827	1	1	3149	2	20255	101107664
GO:0016647	oxidoreductase activity, acting on the CH-NH group of donors, oxygen as acceptor	molecular_function	0.30827	1	1	3149	2	20255	101107664
GO:0046653	tetrahydrofolate metabolic process	biological_process	0.30827	1	1	3149	2	20255	101107664
GO:0019901	protein kinase binding	molecular_function	0.30865	1	8	3149	40	20255	1.01123e+68
GO:0007267	cell-cell signaling	biological_process	0.30883	1	6	3149	28	20255	1.01121e+53
GO:0007034	vacuolar transport	biological_process	0.30908	1	5	3149	24	20255	1.0111e+44
GO:0009225	nucleotide-sugar metabolic process	biological_process	0.30943	1	2	3149	7	20255	1.01103e+17
GO:0000975	regulatory region DNA binding	molecular_function	0.31125	1	5	3149	23	20255	1.01105e+44
GO:0001067	regulatory region nucleic acid binding	molecular_function	0.31125	1	5	3149	23	20255	1.01104e+44
GO:0007596	blood coagulation	biological_process	0.31174	1	24	3149	131	20255	1.01109e+209
GO:0018112	proline racemase activity	molecular_function	0.31229	1	1	3149	2	20255	101102239
GO:0006820	anion transport	biological_process	0.31258	1	34	3149	190	20255	101113879,101113325,101118277,101115453,101111082,101112074,101112181,101115921,101123422,101116998,101122427,101123476,105604604,101113782,101111313,101104153,101123487,101104799,101104441,101111503,101108539,101118063,101114004,101102386,101106278,101120333,101117821,101114627,101106170,101111209,101105770,101117113,101113094,100820755
GO:0008200	ion channel inhibitor activity	molecular_function	0.3127	1	25	3149	136	20255	1.01106e+218
GO:0016248	channel inhibitor activity	molecular_function	0.3127	1	25	3149	136	20255	1.01104e+218
GO:0008375	acetylglucosaminyltransferase activity	molecular_function	0.31272	1	7	3149	34	20255	5.41609e+59
GO:0030990	intraciliary transport particle	cellular_component	0.31317	1	1	3149	2	20255	101111886
GO:0030991	intraciliary transport particle A	cellular_component	0.31317	1	1	3149	2	20255	101111886
GO:0051536	iron-sulfur cluster binding	molecular_function	0.31332	1	25	3149	141	20255	1.01115e+224
GO:0051540	metal cluster binding	molecular_function	0.31332	1	25	3149	141	20255	1.01113e+224
GO:0006909	phagocytosis	biological_process	0.31361	1	1	3149	2	20255	101111925
GO:0030100	regulation of endocytosis	biological_process	0.31361	1	1	3149	2	20255	101111925
GO:0045806	negative regulation of endocytosis	biological_process	0.31361	1	1	3149	2	20255	101111925
GO:0050764	regulation of phagocytosis	biological_process	0.31361	1	1	3149	2	20255	101111925
GO:0050765	negative regulation of phagocytosis	biological_process	0.31361	1	1	3149	2	20255	101111925
GO:0003964	RNA-directed DNA polymerase activity	molecular_function	0.31363	1	4	3149	18	20255	1.01108e+35
GO:0007217	tachykinin receptor signaling pathway	biological_process	0.31388	1	4	3149	18	20255	1.01119e+32
GO:0050290	sphingomyelin phosphodiesterase D activity	molecular_function	0.31413	1	1	3149	2	20255	101119587
GO:0016860	intramolecular oxidoreductase activity	molecular_function	0.3149	1	8	3149	42	20255	1.01115e+71
GO:0016866	intramolecular transferase activity	molecular_function	0.31525	1	9	3149	47	20255	1.01114e+80
GO:0032957	inositol trisphosphate metabolic process	biological_process	0.31534	1	1	3149	2	20255	101115161
GO:0043647	inositol phosphate metabolic process	biological_process	0.31534	1	1	3149	2	20255	101115161
GO:0047325	inositol tetrakisphosphate 1-kinase activity	molecular_function	0.31534	1	1	3149	2	20255	101115161
GO:0051765	inositol tetrakisphosphate kinase activity	molecular_function	0.31534	1	1	3149	2	20255	101115161
GO:0052725	inositol-1,3,4-trisphosphate 6-kinase activity	molecular_function	0.31534	1	1	3149	2	20255	101115161
GO:0052726	inositol-1,3,4-trisphosphate 5-kinase activity	molecular_function	0.31534	1	1	3149	2	20255	101115161
GO:0004615	phosphomannomutase activity	molecular_function	0.31543	1	1	3149	2	20255	101103393
GO:0009226	nucleotide-sugar biosynthetic process	biological_process	0.31543	1	1	3149	2	20255	101103393
GO:0009298	GDP-mannose biosynthetic process	biological_process	0.31543	1	1	3149	2	20255	101103393
GO:0019673	GDP-mannose metabolic process	biological_process	0.31543	1	1	3149	2	20255	101103393
GO:0019042	viral latency	biological_process	0.31581	1	1	3149	2	20255	101104440
GO:0008849	enterochelin esterase activity	molecular_function	0.31587	1	1	3149	2	20255	101103679
GO:0043158	heterocyst differentiation	biological_process	0.31587	1	1	3149	2	20255	101108865
GO:0004883	glucocorticoid receptor activity	molecular_function	0.31587	1	1	3149	2	20255	101121554
GO:0008811	chloramphenicol O-acetyltransferase activity	molecular_function	0.31587	1	1	3149	2	20255	100913169
GO:0031958	corticosteroid receptor signaling pathway	biological_process	0.31587	1	1	3149	2	20255	101121554
GO:0031960	response to corticosteroid	biological_process	0.31587	1	1	3149	2	20255	101121554
GO:0042921	glucocorticoid receptor signaling pathway	biological_process	0.31587	1	1	3149	2	20255	101121554
GO:0043402	glucocorticoid mediated signaling pathway	biological_process	0.31587	1	1	3149	2	20255	101121554
GO:0051384	response to glucocorticoid	biological_process	0.31587	1	1	3149	2	20255	101121554
GO:0071384	cellular response to corticosteroid stimulus	biological_process	0.31587	1	1	3149	2	20255	101121554
GO:0071385	cellular response to glucocorticoid stimulus	biological_process	0.31587	1	1	3149	2	20255	101121554
GO:0006113	fermentation	biological_process	0.31587	1	1	3149	2	20255	101106567
GO:0019665	anaerobic amino acid catabolic process	biological_process	0.31587	1	1	3149	2	20255	101106567
GO:0019030	icosahedral viral capsid	cellular_component	0.31587	1	1	3149	2	20255	101117891
GO:0010393	galacturonan metabolic process	biological_process	0.31587	1	1	3149	2	20255	101109226
GO:0030259	lipid glycosylation	biological_process	0.31587	1	1	3149	2	20255	101110667
GO:0030541	plasmid partitioning	biological_process	0.31587	1	1	3149	2	20255	101104081
GO:0045488	pectin metabolic process	biological_process	0.31587	1	1	3149	2	20255	101109226
GO:0045490	pectin catabolic process	biological_process	0.31587	1	1	3149	2	20255	101109226
GO:0042113	B cell activation	biological_process	0.31587	1	1	3149	2	20255	101116105
GO:0042274	ribosomal small subunit biogenesis	biological_process	0.31587	1	1	3149	2	20255	443434
GO:0004057	arginyltransferase activity	molecular_function	0.31587	1	1	3149	2	20255	101110286
GO:0004489	methylenetetrahydrofolate reductase (NAD(P)H) activity	molecular_function	0.31587	1	1	3149	2	20255	101111645
GO:0016598	protein arginylation	biological_process	0.31587	1	1	3149	2	20255	101110286
GO:0016812	hydrolase activity, acting on carbon-nitrogen (but not peptide) bonds, in cyclic amides	molecular_function	0.31587	1	1	3149	2	20255	101113525
GO:0016867	intramolecular transferase activity, transferring acyl groups	molecular_function	0.31587	1	1	3149	2	20255	101120920
GO:0016993	precorrin-8X methylmutase activity	molecular_function	0.31587	1	1	3149	2	20255	101120920
GO:0045300	acyl-[acyl-carrier-protein] desaturase activity	molecular_function	0.31587	1	1	3149	2	20255	100505404
GO:0005283	sodium:amino acid symporter activity	molecular_function	0.31587	1	1	3149	2	20255	101108539
GO:0005313	L-glutamate transmembrane transporter activity	molecular_function	0.31587	1	1	3149	2	20255	101108539
GO:0005416	cation:amino acid symporter activity	molecular_function	0.31587	1	1	3149	2	20255	101108539
GO:0015172	acidic amino acid transmembrane transporter activity	molecular_function	0.31587	1	1	3149	2	20255	101108539
GO:0015501	glutamate:sodium symporter activity	molecular_function	0.31587	1	1	3149	2	20255	101108539
GO:0015800	acidic amino acid transport	biological_process	0.31587	1	1	3149	2	20255	101108539
GO:0015807	L-amino acid transport	biological_process	0.31587	1	1	3149	2	20255	101108539
GO:0015813	L-glutamate transport	biological_process	0.31587	1	1	3149	2	20255	101108539
GO:0032400	melanosome localization	biological_process	0.31587	1	1	3149	2	20255	101113317
GO:0032401	establishment of melanosome localization	biological_process	0.31587	1	1	3149	2	20255	101113317
GO:0032402	melanosome transport	biological_process	0.31587	1	1	3149	2	20255	101113317
GO:0033059	cellular pigmentation	biological_process	0.31587	1	1	3149	2	20255	101113317
GO:0043473	pigmentation	biological_process	0.31587	1	1	3149	2	20255	101113317
GO:0051875	pigment granule localization	biological_process	0.31587	1	1	3149	2	20255	101113317
GO:0051904	pigment granule transport	biological_process	0.31587	1	1	3149	2	20255	101113317
GO:0051905	establishment of pigment granule localization	biological_process	0.31587	1	1	3149	2	20255	101113317
GO:0008171	O-methyltransferase activity	molecular_function	0.31636	1	9	3149	46	20255	1.01104e+80
GO:0044036	cell wall macromolecule metabolic process	biological_process	0.31648	1	3	3149	13	20255	1.01104e+26
GO:0009403	toxin biosynthetic process	biological_process	0.3166	1	2	3149	7	20255	1.06992e+17
GO:0030154	cell differentiation	biological_process	0.31759	1	35	3149	200	20255	101118095,101109126,101101974,100885767,101108297,101103268,105604798,101103198,101118372,101120384,101108536,101108799,101112247,101116359,101106029,100192423,101109063,101106848,101123259,101110012,101116073,101111324,101104535,101108788,105601924,105611383,101108865,101110722,101119023,101104023,101108806,101113775,101120050,101119556,100135438
GO:0000921	septin ring assembly	biological_process	0.31842	1	6	3149	28	20255	1.05607e+53
GO:0005940	septin ring	cellular_component	0.31842	1	6	3149	28	20255	1.05607e+53
GO:0031106	septin ring organization	biological_process	0.31842	1	6	3149	28	20255	1.0111e+53
GO:0032156	septin cytoskeleton	cellular_component	0.31842	1	6	3149	28	20255	1.01123e+53
GO:0032185	septin cytoskeleton organization	biological_process	0.31842	1	6	3149	28	20255	1.01116e+53
GO:0001765	membrane raft assembly	biological_process	0.3189	1	3	3149	12	20255	1.01115e+26
GO:0031579	membrane raft organization	biological_process	0.3189	1	3	3149	12	20255	1.01111e+26
GO:0044854	plasma membrane raft assembly	biological_process	0.3189	1	3	3149	12	20255	1.01111e+26
GO:0044857	plasma membrane raft organization	biological_process	0.3189	1	3	3149	12	20255	1.01107e+26
GO:0070836	caveola assembly	biological_process	0.3189	1	3	3149	12	20255	1.01111e+26
GO:0000725	recombinational repair	biological_process	0.31948	1	2	3149	7	20255	1.0112e+17
GO:0004659	prenyltransferase activity	molecular_function	0.31953	1	5	3149	24	20255	1.00302e+44
GO:0003924	GTPase activity	molecular_function	0.32037	1	67	3149	401	20255	101116194,101107117,101106333,100302077,101119215,100302308,105614852,101108182,101120590,101115097,101123118,101109813,101121529,101122048,101110857,101103906,101113132,101112132,101103539,106991387,101113997,101105602,101104154,101109385,101121677,101117328,101119308,101114396,101108554,101108370,105605158,101103725,101117755,101123290,100147794,101123345,101104887,105601843,101104195,101121976…
GO:0000152	nuclear ubiquitin ligase complex	cellular_component	0.3205	1	21	3149	116	20255	1.01117e+188
GO:0005680	anaphase-promoting complex	cellular_component	0.3205	1	21	3149	116	20255	1.01106e+188
GO:0031461	cullin-RING ubiquitin ligase complex	cellular_component	0.3205	1	21	3149	116	20255	1.05607e+188
GO:0046332	SMAD binding	molecular_function	0.32068	1	4	3149	18	20255	1.01122e+35
GO:0000103	sulfate assimilation	biological_process	0.32106	1	4	3149	17	20255	1.01121e+35
GO:0004020	adenylylsulfate kinase activity	molecular_function	0.32106	1	4	3149	17	20255	1.01121e+35
GO:0032403	protein complex binding	molecular_function	0.32166	1	53	3149	315	20255	101120590,100302308,101122169,101122038,101123118,100101228,101109813,100147790,101107533,101122784,100526780,101110894,101115403,101119215,101105836,101106209,101108814,101118095,101113963,101105602,494441,101104261,101118036,101112456,101122564,101115220,101108506,101112735,443396,101108142,101121256,101120650,101121164,101117755,101119023,101108554,101121554,101103234,101102985,105605158,10110…
GO:0016051	carbohydrate biosynthetic process	biological_process	0.32172	1	18	3149	99	20255	1.00038e+161
GO:0005813	centrosome	cellular_component	0.32177	1	2	3149	7	20255	1.01124e+17
GO:0009968	negative regulation of signal transduction	biological_process	0.32216	1	5	3149	24	20255	1.01117e+44
GO:0032259	methylation	biological_process	0.32386	1	18	3149	98	20255	1.0112e+161
GO:0060589	nucleoside-triphosphatase regulator activity	molecular_function	0.32392	1	26	3149	146	20255	101121484,101108748,100820750,101122156,105612424,101119250,101115341,101110163,101105821,101116087,101112448,443415,106990803,101123146,101111683,101104264,101122040,101104547,101102555,101108447,101110406,101101937,101122735,101114713,101104446,101123631
GO:0006357	regulation of transcription from RNA polymerase II promoter	biological_process	0.32449	1	30	3149	170	20255	101110264,101115998,101111916,101105809,101110402,101114396,101111271,101105398,101113585,101122097,101114356,101122784,101115315,101114962,678682,101120760,101118731,101120730,101123345,101107557,101110363,101106073,101117517,101112696,101119587,101105413,101123207,101122216,101109192,101115304
GO:0008318	protein prenyltransferase activity	molecular_function	0.32495	1	3	3149	13	20255	1.01106e+26
GO:0005231	excitatory extracellular ligand-gated ion channel activity	molecular_function	0.32501	1	6	3149	28	20255	1.01116e+53
GO:0009404	toxin metabolic process	biological_process	0.32751	1	6	3149	29	20255	1.0111e+53
GO:0071804	cellular potassium ion transport	biological_process	0.328	1	2	3149	7	20255	1.01121e+17
GO:0071805	potassium ion transmembrane transport	biological_process	0.328	1	2	3149	7	20255	1.01121e+17
GO:0009967	positive regulation of signal transduction	biological_process	0.32844	1	9	3149	49	20255	1.01106e+80
GO:0010647	positive regulation of cell communication	biological_process	0.32844	1	9	3149	49	20255	1.01115e+80
GO:0023056	positive regulation of signaling	biological_process	0.32844	1	9	3149	49	20255	1.01123e+80
GO:0000917	barrier septum assembly	biological_process	0.32848	1	17	3149	95	20255	1.05612e+149
GO:0032506	cytokinetic process	biological_process	0.32848	1	17	3149	95	20255	1.01107e+149
GO:0090529	cell septum assembly	biological_process	0.32848	1	17	3149	95	20255	1.01111e+149
GO:1902410	mitotic cytokinetic process	biological_process	0.32848	1	17	3149	95	20255	1.01123e+149
GO:0061695	transferase complex, transferring phosphorus-containing groups	cellular_component	0.32926	1	24	3149	142	20255	1.01119e+215
GO:0006919	activation of cysteine-type endopeptidase activity involved in apoptotic process	biological_process	0.32982	1	3	3149	12	20255	1.01122e+26
GO:0010950	positive regulation of endopeptidase activity	biological_process	0.32982	1	3	3149	12	20255	1.00505e+26
GO:0010952	positive regulation of peptidase activity	biological_process	0.32982	1	3	3149	12	20255	1.00505e+26
GO:0031638	zymogen activation	biological_process	0.32982	1	3	3149	12	20255	1.00505e+26
GO:0043280	positive regulation of cysteine-type endopeptidase activity involved in apoptotic process	biological_process	0.32982	1	3	3149	12	20255	1.01122e+26
GO:0045862	positive regulation of proteolysis	biological_process	0.32982	1	3	3149	12	20255	1.01112e+26
GO:0097202	activation of cysteine-type endopeptidase activity	biological_process	0.32982	1	3	3149	12	20255	1.01112e+26
GO:2001056	positive regulation of cysteine-type endopeptidase activity	biological_process	0.32982	1	3	3149	12	20255	1.01122e+26
GO:0072657	protein localization to membrane	biological_process	0.32985	1	16	3149	86	20255	1.01107e+143
GO:0019835	cytolysis	biological_process	0.3317	1	7	3149	33	20255	1.01111e+59
GO:0008652	cellular amino acid biosynthetic process	biological_process	0.33201	1	22	3149	126	20255	1.01118e+191
GO:0019049	evasion or tolerance of host defenses by virus	biological_process	0.33291	1	4	3149	18	20255	1.01105e+35
GO:0015232	heme transporter activity	molecular_function	0.33293	1	2	3149	7	20255	1.01108e+17
GO:0043066	negative regulation of apoptotic process	biological_process	0.33378	1	7	3149	34	20255	1.01106e+59
GO:0043069	negative regulation of programmed cell death	biological_process	0.33378	1	7	3149	34	20255	1.01113e+59
GO:0060548	negative regulation of cell death	biological_process	0.33378	1	7	3149	34	20255	1.0111e+59
GO:0005375	copper ion transmembrane transporter activity	molecular_function	0.33445	1	4	3149	19	20255	1.01123e+35
GO:0035434	copper ion transmembrane transport	biological_process	0.33445	1	4	3149	19	20255	1.01117e+35
GO:0004523	RNA-DNA hybrid ribonuclease activity	molecular_function	0.33531	1	9	3149	49	20255	1.05609e+80
GO:0009229	thiamine diphosphate biosynthetic process	biological_process	0.33579	1	2	3149	7	20255	1.0112e+17
GO:0042357	thiamine diphosphate metabolic process	biological_process	0.33579	1	2	3149	7	20255	1.01116e+17
GO:0008017	microtubule binding	molecular_function	0.33603	1	23	3149	126	20255	4.94441e+197
GO:0004664	prephenate dehydratase activity	molecular_function	0.33708	1	1	3149	3	20255	106991756
GO:0009094	L-phenylalanine biosynthetic process	biological_process	0.33708	1	1	3149	3	20255	106991756
GO:1902223	erythrose 4-phosphate/phosphoenolpyruvate family amino acid biosynthetic process	biological_process	0.33708	1	1	3149	3	20255	106991756
GO:0042802	identical protein binding	molecular_function	0.33717	1	30	3149	167	20255	101110219,101113252,101108447,100526785,101105836,101112716,105605902,101102621,101114717,101116082,101106095,101114931,101112092,101123372,101122784,101108578,101109430,101123238,101119674,101119381,105612424,101107427,101114034,101110495,101109254,101110490,101116087,101116107,101111010,101111791
GO:0000087	mitotic M phase	biological_process	0.33735	1	6	3149	29	20255	1.01113e+53
GO:0098763	mitotic cell cycle phase	biological_process	0.33735	1	6	3149	29	20255	1.01113e+53
GO:0034227	tRNA thio-modification	biological_process	0.33752	1	3	3149	13	20255	1.01107e+26
GO:0005789	endoplasmic reticulum membrane	cellular_component	0.33759	1	34	3149	197	20255	101114715,101118296,101117462,101105174,101114909,101114396,101114641,101103725,101112476,101106367,105604186,101107383,101120760,101102424,101109090,101116998,101108768,101102863,106990133,101104838,101116165,101121793,101110797,101117435,105614591,101122806,101105271,101110857,443064,101108987,100302099,101122168,443364,101105838
GO:0045261	proton-transporting ATP synthase complex, catalytic core F(1)	cellular_component	0.3384	1	4	3149	18	20255	1.0111e+35
GO:0009067	aspartate family amino acid biosynthetic process	biological_process	0.34004	1	5	3149	25	20255	1.01118e+41
GO:0022414	reproductive process	biological_process	0.34028	1	32	3149	186	20255	101115414,101104246,101112876,101117582,101108788,105601924,101123025,101101879,101110722,101103083,101108428,101104023,101108435,101113775,105610024,100302356,101105963,101118862,101109126,101110365,101101974,101114421,100885767,101104674,101110306,101118372,101120384,101108799,101113866,101106848,101109063,101108877
GO:0051235	maintenance of location	biological_process	0.34039	1	10	3149	52	20255	1.06992e+89
GO:0040013	negative regulation of locomotion	biological_process	0.34062	1	2	3149	7	20255	1.0111e+17
GO:0051271	negative regulation of cellular component movement	biological_process	0.34062	1	2	3149	7	20255	1.0111e+17
GO:2000146	negative regulation of cell motility	biological_process	0.34062	1	2	3149	7	20255	1.01119e+17
GO:0048870	cell motility	biological_process	0.34133	1	25	3149	140	20255	1.01107e+221
GO:0051674	localization of cell	biological_process	0.34133	1	25	3149	140	20255	1.05612e+221
GO:0044179	hemolysis in other organism	biological_process	0.34175	1	3	3149	12	20255	1.01113e+23
GO:0051715	cytolysis in other organism	biological_process	0.34175	1	3	3149	12	20255	1.01113e+23
GO:0004810	tRNA adenylyltransferase activity	molecular_function	0.34416	1	2	3149	7	20255	1.01114e+17
GO:0040007	growth	biological_process	0.34516	1	14	3149	77	20255	4.43174e+119
GO:0008827	cytochrome o ubiquinol oxidase activity	molecular_function	0.34749	1	2	3149	7	20255	1.01104e+17
GO:0051648	vesicle localization	biological_process	0.34759	1	2	3149	7	20255	1.01119e+17
GO:0051650	establishment of vesicle localization	biological_process	0.34759	1	2	3149	7	20255	1.01119e+17
GO:0051246	regulation of protein metabolic process	biological_process	0.34801	1	23	3149	131	20255	1.01113e+203
GO:0008026	ATP-dependent helicase activity	molecular_function	0.34815	1	9	3149	48	20255	1.01108e+80
GO:0070035	purine NTP-dependent helicase activity	molecular_function	0.34815	1	9	3149	48	20255	1.01108e+80
GO:0048468	cell development	biological_process	0.34845	1	19	3149	105	20255	1.01111e+170
GO:0005577	fibrinogen complex	cellular_component	0.34939	1	19	3149	105	20255	1.0111e+170
GO:0030168	platelet activation	biological_process	0.34939	1	19	3149	105	20255	1.0112e+170
GO:0006464	cellular protein modification process	biological_process	0.35001	1	241	3149	1444	20255	100913159,101116999,101122739,101102034,101114356,101112429,101104881,101103094,101110194,101116504,101113256,101117410,101113178,780519,101122041,101110575,101110286,101103124,100101234,101105032,101122959,101103864,101103946,101105018,101120665,101122385,101103077,101119364,101105428,497272,101121074,101110944,101109789,101115684,101107089,101111852,101105855,101121672,101111134,101102364,10110…
GO:0036211	protein modification process	biological_process	0.35001	1	241	3149	1444	20255	101121391,101119070,101105786,101108266,101116218,101109460,101120041,101108429,101110900,101120272,100302350,101103907,101110150,101111281,101117245,101117721,101121208,101119525,101102747,101115765,101102951,101112033,101116114,101108816,101111351,101103527,101109754,101105271,101112234,101109637,101112260,101120569,101116437,101103497,101119643,101122151,101111916,101116802,101103081,101118723…
GO:0003746	translation elongation factor activity	molecular_function	0.35089	1	5	3149	28	20255	1.01115e+41
GO:0008134	transcription factor binding	molecular_function	0.35106	1	34	3149	191	20255	101123238,101109430,101110490,101109254,105605902,101105090,101109113,101105420,101114931,101108446,101107427,101114034,101110495,101115463,101119381,101104055,101115931,101116097,101102117,101111010,101111791,101116107,101112716,101105836,100526785,101110219,101113252,101116551,101122604,101113475,101123372,101122784,101113802,101114717
GO:0008535	respiratory chain complex IV assembly	biological_process	0.3514	1	3	3149	13	20255	1.01104e+26
GO:0033617	mitochondrial respiratory chain complex IV assembly	biological_process	0.3514	1	3	3149	13	20255	1.01111e+26
GO:0019954	asexual reproduction	biological_process	0.35182	1	18	3149	102	20255	1.01103e+158
GO:0001071	nucleic acid binding transcription factor activity	molecular_function	0.352	1	133	3149	797	20255	101109888,101112535,101110159,101116194,101122040,101123398,101123177,101109116,101105452,101107113,101110637,101121465,100820750,101103705,101110783,101105408,100307043,101118234,443381,101123551,101106119,100653388,443299,101102555,101103696,101119239,101112967,101108524,100192430,101119581,101102402,101110105,101106496,101119756,101102760,100240742,101117625,101115266,101114771,101112716,10111…
GO:0003700	transcription factor activity, sequence-specific DNA binding	molecular_function	0.352	1	133	3149	797	20255	443299,101106119,100653388,101118234,101123551,443381,101112967,101102555,101103696,101119239,101119581,100192430,101108524,101106496,101110105,101102402,101110159,101109888,101112535,101109116,101105452,101123177,101116194,101123398,101122040,101121465,101110637,101107113,100307043,101103705,101110783,101105408,100820750,101112411,101121261,101103683,101113222,101122299,101111271,443156,10110439…
GO:0005186	pheromone activity	molecular_function	0.35207	1	4	3149	18	20255	1.01118e+35
GO:0000151	ubiquitin ligase complex	cellular_component	0.35293	1	21	3149	118	20255	1.01112e+188
GO:0009218	pyrimidine ribonucleotide metabolic process	biological_process	0.35318	1	3	3149	13	20255	1.0111e+26
GO:0009220	pyrimidine ribonucleotide biosynthetic process	biological_process	0.35318	1	3	3149	13	20255	1.01112e+26
GO:0044769	ATPase activity, coupled to transmembrane movement of ions, rotational mechanism	molecular_function	0.35358	1	4	3149	19	20255	1.0111e+35
GO:0048193	Golgi vesicle transport	biological_process	0.35421	1	28	3149	162	20255	101113782,101115210,101115150,101109430,101106022,101120572,101112696,101111010,106990803,101107341,101103190,101112448,101117024,101105809,101120041,101114460,101110219,101113252,101106442,101118786,101123650,101119023,101122048,101121171,101118731,101120199,101120768,101116872
GO:0015074	DNA integration	biological_process	0.35734	1	13	3149	73	20255	1.01104e+116
GO:0051274	beta-glucan biosynthetic process	biological_process	0.35761	1	2	3149	8	20255	1.01113e+17
GO:0010851	cyclase regulator activity	molecular_function	0.35829	1	1	3149	3	20255	100125620
GO:0010853	cyclase activator activity	molecular_function	0.35829	1	1	3149	3	20255	100125620
GO:0030249	guanylate cyclase regulator activity	molecular_function	0.35829	1	1	3149	3	20255	100125620
GO:0030250	guanylate cyclase activator activity	molecular_function	0.35829	1	1	3149	3	20255	100125620
GO:0001816	cytokine production	biological_process	0.35905	1	5	3149	24	20255	1.01103e+44
GO:0001817	regulation of cytokine production	biological_process	0.35905	1	5	3149	24	20255	1.00127e+44
GO:0001819	positive regulation of cytokine production	biological_process	0.35905	1	5	3149	24	20255	1.05611e+44
GO:0044091	membrane biogenesis	biological_process	0.35932	1	3	3149	13	20255	1.01111e+26
GO:0071709	membrane assembly	biological_process	0.35932	1	3	3149	13	20255	1.01107e+26
GO:0016053	organic acid biosynthetic process	biological_process	0.35945	1	30	3149	176	20255	101111834,443005,101107679,101112411,101106373,101109735,106991756,101122299,101111009,106992004,101117520,101112818,101102594,101117514,101114318,101114524,101115341,105610921,101102295,101110490,443369,101121516,101106474,101123345,101118372,105616433,101111894,101116797,101108201,101103906
GO:0046394	carboxylic acid biosynthetic process	biological_process	0.35945	1	30	3149	176	20255	101112818,101117520,106992004,101111009,101122299,106991756,101109735,101106373,101112411,101107679,443005,101111834,101103906,101108201,101116797,105616433,101118372,101111894,101123345,101106474,443369,101121516,101102295,101110490,105610921,101115341,101114524,101114318,101117514,101102594
GO:0002831	regulation of response to biotic stimulus	biological_process	0.35991	1	3	3149	13	20255	1.01108e+26
GO:0044723	single-organism carbohydrate metabolic process	biological_process	0.36	1	55	3149	326	20255	101108239,101118216,101106255,101104761,443211,101117587,105609660,101108384,443085,443489,101110667,101110268,101110626,101107621,101122716,101120130,101113475,101109813,443164,100127212,100037690,101120590,101109735,101117198,101113802,101123118,443364,101122168,101115765,101102779,101121672,101123238,101108745,101110196,101117960,100302302,101112876,101122842,101103907,101102088,100037684,1011…
GO:0007009	plasma membrane organization	biological_process	0.36008	1	6	3149	29	20255	1.01114e+53
GO:0001775	cell activation	biological_process	0.36025	1	21	3149	118	20255	1.01109e+188
GO:0043900	regulation of multi-organism process	biological_process	0.3614	1	7	3149	36	20255	1.01114e+62
GO:0016757	transferase activity, transferring glycosyl groups	molecular_function	0.36167	1	63	3149	371	20255	101108745,101117960,101123345,105608435,101115765,101114706,101112212,101121672,101102364,101106756,101103907,101106785,101102088,101117447,101112876,101120155,101123204,101108554,105607760,106992004,101117410,101108248,101110286,101111224,105605624,101115274,100913159,101118731,101102334,101111670,101105203,101116508,101111201,101120264,101118216,101103906,101121756,541609,101103861,101107092,10…
GO:0044413	avoidance of host defenses	biological_process	0.36175	1	5	3149	24	20255	1.01104e+44
GO:0044415	evasion or tolerance of host defenses	biological_process	0.36175	1	5	3149	24	20255	1.01119e+44
GO:0051832	avoidance of defenses of other organism involved in symbiotic interaction	biological_process	0.36175	1	5	3149	24	20255	1.01104e+44
GO:0051834	evasion or tolerance of defenses of other organism involved in symbiotic interaction	biological_process	0.36175	1	5	3149	24	20255	1.01104e+44
GO:0052173	response to defenses of other organism involved in symbiotic interaction	biological_process	0.36175	1	5	3149	24	20255	1.01105e+44
GO:0052200	response to host defenses	biological_process	0.36175	1	5	3149	24	20255	1.01104e+44
GO:0075136	response to host	biological_process	0.36175	1	5	3149	24	20255	1.01115e+44
GO:0016462	pyrophosphatase activity	molecular_function	0.3618	1	155	3149	931	20255	101101873,101110050,101109873,101109534,101109665,101121976,101114037,100147794,101117517,101121821,101104887,101123345,101105420,101117755,101103725,101119308,101114396,101120179,101121677,100305130,101113963,101107111,101104261,101106193,101105602,101113997,101109235,101113132,101115254,100820750,101115463,101104055,101103539,101112735,101115220,101123118,101115097,101120590,105614852,100302308…
GO:0004298	threonine-type endopeptidase activity	molecular_function	0.36213	1	5	3149	28	20255	1.01116e+44
GO:0070003	threonine-type peptidase activity	molecular_function	0.36213	1	5	3149	28	20255	1.01118e+44
GO:0042803	protein homodimerization activity	molecular_function	0.36217	1	23	3149	129	20255	1.01115e+206
GO:0003678	DNA helicase activity	molecular_function	0.36228	1	21	3149	118	20255	1.01108e+188
GO:0005215	transporter activity	molecular_function	0.36237	1	276	3149	1657	20255	101121256,101112587,100294596,101121462,101114004,101110406,101104181,101108864,101119497,101104736,101117397,101114065,101121330,101106170,101107038,101120711,101113094,101108763,101122229,101115663,101122169,101118571,101116416,101107725,101121535,101112315,101107290,101121389,101120286,101113195,101118911,101107510,101122427,101119252,101109816,101105420,101113585,101121677,101102128,101102915…
GO:0043189	H4/H2A histone acetyltransferase complex	cellular_component	0.36258	1	1	3149	3	20255	101111383
GO:1902562	H4 histone acetyltransferase complex	cellular_component	0.36258	1	1	3149	3	20255	101111383
GO:0030031	cell projection assembly	biological_process	0.36487	1	7	3149	36	20255	1.01118e+62
GO:0006858	extracellular transport	biological_process	0.3663	1	3	3149	14	20255	1.01111e+26
GO:0005326	neurotransmitter transporter activity	molecular_function	0.36748	1	5	3149	24	20255	1.01106e+44
GO:0005328	neurotransmitter:sodium symporter activity	molecular_function	0.36748	1	5	3149	24	20255	1.01121e+44
GO:0005795	Golgi stack	cellular_component	0.36936	1	3	3149	13	20255	1.01115e+26
GO:0003910	DNA ligase (ATP) activity	molecular_function	0.36999	1	3	3149	14	20255	1.01123e+26
GO:0015399	primary active transmembrane transporter activity	molecular_function	0.37097	1	23	3149	129	20255	1.06991e+206
GO:0015405	P-P-bond-hydrolysis-driven transmembrane transporter activity	molecular_function	0.37097	1	23	3149	129	20255	1.01114e+206
GO:0003006	developmental process involved in reproduction	biological_process	0.37122	1	14	3149	79	20255	1.01104e+125
GO:0051015	actin filament binding	molecular_function	0.37136	1	6	3149	29	20255	1.01115e+53
GO:0020012	evasion or tolerance of host immune response	biological_process	0.37195	1	3	3149	13	20255	1.01108e+26
GO:0051805	evasion or tolerance of immune response of other organism involved in symbiotic interaction	biological_process	0.37195	1	3	3149	13	20255	1.01115e+26
GO:0052564	response to immune response of other organism involved in symbiotic interaction	biological_process	0.37195	1	3	3149	13	20255	1.01115e+26
GO:0052572	response to host immune response	biological_process	0.37195	1	3	3149	13	20255	1.01115e+26
GO:0016620	oxidoreductase activity, acting on the aldehyde or oxo group of donors, NAD or NADP as acceptor	molecular_function	0.37201	1	5	3149	28	20255	4.43005e+41
GO:0052646	alditol phosphate metabolic process	biological_process	0.37371	1	3	3149	13	20255	1.01119e+26
GO:0008053	mitochondrial fusion	biological_process	0.3741	1	5	3149	26	20255	1.01111e+44
GO:0031640	killing of cells of other organism	biological_process	0.37449	1	4	3149	18	20255	1.01113e+32
GO:0044364	disruption of cells of other organism	biological_process	0.37449	1	4	3149	18	20255	4.43087e+32
GO:0007268	synaptic transmission	biological_process	0.37572	1	5	3149	24	20255	1.00035e+44
GO:0005984	disaccharide metabolic process	biological_process	0.37622	1	2	3149	8	20255	1.01109e+17
GO:0016055	Wnt signaling pathway	biological_process	0.3793	1	13	3149	70	20255	1.01112e+116
GO:0019882	antigen processing and presentation	biological_process	0.37997	1	8	3149	45	20255	1.01111e+71
GO:0007155	cell adhesion	biological_process	0.38039	1	66	3149	386	20255	101107427,101103343,101102230,101118313,101113636,101121988,101115341,101112696,101107351,101102185,101118996,101106077,101114377,101110943,101105659,101114226,101103009,101120947,101102480,101106232,101103359,654333,101110170,100192433,101117462,101106727,101123376,101122041,101106120,101108443,101116999,101118998,101121164,105616904,101119023,101112429,101102761,101106981,105601932,101106905,10…
GO:0008175	tRNA methyltransferase activity	molecular_function	0.38131	1	7	3149	38	20255	1.01102e+62
GO:0006432	phenylalanyl-tRNA aminoacylation	biological_process	0.38189	1	2	3149	8	20255	1.01122e+17
GO:0006979	response to oxidative stress	biological_process	0.38295	1	6	3149	32	20255	1.01112e+53
GO:0044248	cellular catabolic process	biological_process	0.38297	1	94	3149	563	20255	101116424,101109087,101109430,101113586,101108392,106990803,101109873,101120419,101104195,101121671,101121166,101107091,101109254,101105772,100913169,101107783,101123650,101120041,101103696,101103925,105602053,101113585,101116449,101116872,101111670,101114931,101118613,100302096,101114475,101116408,101105406,101120440,101111010,101121460,101106567,101109165,101117125,101111580,101109116,101104081…
GO:0004540	ribonuclease activity	molecular_function	0.38311	1	20	3149	116	20255	1.05611e+176
GO:0019915	lipid storage	biological_process	0.3837	1	5	3149	25	20255	1.01103e+44
GO:0009847	spore germination	biological_process	0.38389	1	2	3149	9	20255	1.01111e+17
GO:0043190	ATP-binding cassette (ABC) transporter complex	cellular_component	0.38391	1	1	3149	3	20255	101119115
GO:0004721	phosphoprotein phosphatase activity	molecular_function	0.38535	1	23	3149	131	20255	1.0112e+206
GO:0044448	cell cortex part	cellular_component	0.38544	1	15	3149	82	20255	1.01106e+134
GO:0015105	arsenite transmembrane transporter activity	molecular_function	0.38576	1	1	3149	3	20255	101102386
GO:0015700	arsenite transport	biological_process	0.38576	1	1	3149	3	20255	101102386
GO:0004620	phospholipase activity	molecular_function	0.38623	1	7	3149	35	20255	1.01103e+62
GO:0032465	regulation of cytokinesis	biological_process	0.38625	1	2	3149	8	20255	1.01107e+17
GO:0007166	cell surface receptor signaling pathway	biological_process	0.38626	1	37	3149	216	20255	101116359,105605203,101120096,101115315,101116876,101120569,105606875,101117595,101114662,101116437,101120506,101121702,101103268,101111598,443436,101110251,101118942,100126577,101121814,101108266,101109460,101118998,105601913,101101932,101110575,100305130,780519,105605525,101105174,101115544,105616779,101103389,101103546,101122883,497272,101111324,101106156
GO:0009007	site-specific DNA-methyltransferase (adenine-specific) activity	molecular_function	0.38679	1	1	3149	3	20255	101116026
GO:0009008	DNA-methyltransferase activity	molecular_function	0.38679	1	1	3149	3	20255	101116026
GO:0032775	DNA methylation on adenine	biological_process	0.38679	1	1	3149	3	20255	101116026
GO:0016209	antioxidant activity	molecular_function	0.38806	1	14	3149	80	20255	1.01114e+125
GO:0004174	electron-transferring-flavoprotein dehydrogenase activity	molecular_function	0.38842	1	1	3149	3	20255	101115050
GO:0016649	oxidoreductase activity, acting on the CH-NH group of donors, quinone or similar compound as acceptor	molecular_function	0.38842	1	1	3149	3	20255	101115050
GO:0004140	dephospho-CoA kinase activity	molecular_function	0.39145	1	2	3149	8	20255	1.01113e+17
GO:0008671	2-dehydro-3-deoxygalactonokinase activity	molecular_function	0.39158	1	1	3149	3	20255	105609660
GO:0019520	aldonic acid metabolic process	biological_process	0.39158	1	1	3149	3	20255	105609660
GO:0019583	galactonate metabolic process	biological_process	0.39158	1	1	3149	3	20255	105609660
GO:0019584	galactonate catabolic process	biological_process	0.39158	1	1	3149	3	20255	105609660
GO:0034192	D-galactonate metabolic process	biological_process	0.39158	1	1	3149	3	20255	105609660
GO:0034194	D-galactonate catabolic process	biological_process	0.39158	1	1	3149	3	20255	105609660
GO:0046176	aldonic acid catabolic process	biological_process	0.39158	1	1	3149	3	20255	105609660
GO:0032268	regulation of cellular protein metabolic process	biological_process	0.39189	1	22	3149	128	20255	1.01114e+194
GO:0006732	coenzyme metabolic process	biological_process	0.39233	1	24	3149	135	20255	4.43164e+206
GO:0016714	oxidoreductase activity, acting on paired donors, with incorporation or reduction of molecular oxygen, reduced pteridine as one donor, and incorporation of one atom of oxygen	molecular_function	0.39414	1	4	3149	19	20255	1.01119e+35
GO:0030684	preribosome	cellular_component	0.3944	1	15	3149	86	20255	1.01112e+134
GO:0050804	modulation of synaptic transmission	biological_process	0.39563	1	2	3149	8	20255	1.0111e+17
GO:0050830	defense response to Gram-positive bacterium	biological_process	0.39687	1	4	3149	19	20255	4.94441e+32
GO:0015075	ion transmembrane transporter activity	molecular_function	0.3995	1	197	3149	1189	20255	101120350,101115663,101111476,101120243,101122169,443488,101116416,101107725,101121535,101103020,101121868,101121389,101117208,101120286,101118911,101113195,101116562,101120360,101112591,101122427,101119467,101118435,101113636,105603946,101109816,101108142,101112587,101104552,101110357,101102707,101111271,101121462,101114004,101110004,101110406,101107249,101104181,101108864,101104736,101119497,10…
GO:0004531	deoxyribonuclease II activity	molecular_function	0.39988	1	1	3149	3	20255	101105493
GO:0016889	endodeoxyribonuclease activity, producing 3'-phosphomonoesters	molecular_function	0.39988	1	1	3149	3	20255	101105493
GO:0097034	mitochondrial respiratory chain complex IV biogenesis	biological_process	0.39994	1	3	3149	14	20255	1.01104e+26
GO:0008455	alpha-1,6-mannosylglycoprotein 2-beta-N-acetylglucosaminyltransferase activity	molecular_function	0.40011	1	1	3149	3	20255	101122716
GO:0004512	inositol-3-phosphate synthase activity	molecular_function	0.40012	1	1	3149	3	20255	101120130
GO:0006021	inositol biosynthetic process	biological_process	0.40012	1	1	3149	3	20255	101120130
GO:0046173	polyol biosynthetic process	biological_process	0.40012	1	1	3149	3	20255	101120130
GO:0016999	antibiotic metabolic process	biological_process	0.40019	1	1	3149	3	20255	101113764
GO:0017000	antibiotic biosynthetic process	biological_process	0.40019	1	1	3149	3	20255	101113764
GO:0017144	drug metabolic process	biological_process	0.40019	1	1	3149	3	20255	101113764
GO:0006537	glutamate biosynthetic process	biological_process	0.40026	1	2	3149	8	20255	1.01115e+17
GO:0043650	dicarboxylic acid biosynthetic process	biological_process	0.40026	1	2	3149	8	20255	1.01103e+17
GO:0000910	cytokinesis	biological_process	0.40062	1	19	3149	111	20255	1.01123e+167
GO:0015109	chromate transmembrane transporter activity	molecular_function	0.40089	1	1	3149	3	20255	101120333
GO:0015703	chromate transport	biological_process	0.40089	1	1	3149	3	20255	101120333
GO:0032102	negative regulation of response to external stimulus	biological_process	0.40095	1	3	3149	14	20255	1.01123e+26
GO:0005200	structural constituent of cytoskeleton	molecular_function	0.40303	1	4	3149	20	20255	1.01115e+35
GO:0009913	epidermal cell differentiation	biological_process	0.40352	1	1	3149	3	20255	105611383
GO:0030216	keratinocyte differentiation	biological_process	0.40352	1	1	3149	3	20255	105611383
GO:0043588	skin development	biological_process	0.40352	1	1	3149	3	20255	105611383
GO:0006366	transcription from RNA polymerase II promoter	biological_process	0.40391	1	44	3149	262	20255	101105809,101111916,101119406,101110402,101111883,101105398,101122784,101105271,101115315,101107664,101113081,101107523,105607297,101112696,101123207,101105413,101123178,101115304,101122655,101115998,101110264,101110406,101102829,101114396,101111271,101120739,101113585,101122097,101114356,101120730,101120760,678682,101114962,101118731,101107557,101123345,101110363,101103077,101117517,101106073,10…
GO:0006487	protein N-linked glycosylation	biological_process	0.40413	1	3	3149	14	20255	4.43364e+23
GO:0005234	extracellular-glutamate-gated ion channel activity	molecular_function	0.40429	1	4	3149	19	20255	1.0111e+35
GO:0051119	sugar transmembrane transporter activity	molecular_function	0.4052	1	3	3149	14	20255	1.01117e+26
GO:0000977	RNA polymerase II regulatory region sequence-specific DNA binding	molecular_function	0.40533	1	1	3149	3	20255	101116194
GO:0000978	RNA polymerase II core promoter proximal region sequence-specific DNA binding	molecular_function	0.40533	1	1	3149	3	20255	101116194
GO:0000982	transcription factor activity, RNA polymerase II core promoter proximal region sequence-specific binding	molecular_function	0.40533	1	1	3149	3	20255	101116194
GO:0000987	core promoter proximal region sequence-specific DNA binding	molecular_function	0.40533	1	1	3149	3	20255	101116194
GO:0001012	RNA polymerase II regulatory region DNA binding	molecular_function	0.40533	1	1	3149	3	20255	101116194
GO:0001159	core promoter proximal region DNA binding	molecular_function	0.40533	1	1	3149	3	20255	101116194
GO:0042623	ATPase activity, coupled	molecular_function	0.40544	1	34	3149	199	20255	101111607,101107510,101107765,106991387,101107111,101119252,101114265,101121516,101117606,101113132,101109235,101113475,101111693,101115097,106991125,101109116,101106333,101112932,101116166,101102343,101115580,101114037,101117014,101109665,101121046,101101873,101110043,101121821,101115303,101108719,101121256,100305130,101103677,101120064
GO:0030118	clathrin coat	cellular_component	0.40549	1	5	3149	26	20255	1.01109e+44
GO:0005143	interleukin-12 receptor binding	molecular_function	0.40576	1	1	3149	3	20255	443064
GO:0007029	endoplasmic reticulum organization	biological_process	0.40593	1	5	3149	25	20255	1.01121e+44
GO:0000444	MIS12/MIND type complex	cellular_component	0.40719	1	1	3149	3	20255	101116425
GO:0009733	response to auxin	biological_process	0.40825	1	1	3149	3	20255	101107755
GO:0004784	superoxide dismutase activity	molecular_function	0.40936	1	2	3149	8	20255	1.01118e+17
GO:0016721	oxidoreductase activity, acting on superoxide radicals as acceptor	molecular_function	0.40936	1	2	3149	8	20255	1.01115e+17
GO:0006816	calcium ion transport	biological_process	0.40998	1	6	3149	31	20255	1.01105e+53
GO:0009086	methionine biosynthetic process	biological_process	0.41025	1	1	3149	3	20255	101116797
GO:0033130	acetylcholine receptor binding	molecular_function	0.41058	1	2	3149	8	20255	1.0111e+17
GO:0043495	protein anchor	molecular_function	0.41058	1	2	3149	8	20255	1.0111e+17
GO:0021537	telencephalon development	biological_process	0.41112	1	1	3149	3	20255	100505404
GO:0021543	pallium development	biological_process	0.41112	1	1	3149	3	20255	100505404
GO:0021987	cerebral cortex development	biological_process	0.41112	1	1	3149	3	20255	100505404
GO:0030900	forebrain development	biological_process	0.41112	1	1	3149	3	20255	100505404
GO:0006665	sphingolipid metabolic process	biological_process	0.41118	1	3	3149	14	20255	1.01121e+26
GO:0019354	siroheme biosynthetic process	biological_process	0.41129	1	3	3149	14	20255	1.01118e+26
GO:0043115	precorrin-2 dehydrogenase activity	molecular_function	0.41129	1	3	3149	14	20255	1.01118e+26
GO:0046156	siroheme metabolic process	biological_process	0.41129	1	3	3149	14	20255	1.01124e+26
GO:0008219	cell death	biological_process	0.41268	1	32	3149	189	20255	101113497,105614909,101107161,101118942,101120685,101109018,101105677,101110953,101117085,101112315,101113728,100505402,101108051,101111663,101116205,101102430,101110017,101110043,101104519,101114715,101106914,101119930,101112751,101116389,101111239,101106588,443087,101121971,101119070,101107136,443059,101117012
GO:0016265	death	biological_process	0.41268	1	32	3149	189	20255	101112315,101105677,101117085,101110953,101108051,100505402,101111663,101116205,101113728,101107161,105614909,101118942,101113497,101120685,101109018,443087,101116389,101111239,101106588,101107136,101117012,443059,101121971,101119070,101110017,101110043,101104519,101102430,101119930,101112751,101106914,101114715
GO:0070009	serine-type aminopeptidase activity	molecular_function	0.4141	1	2	3149	9	20255	1.00146e+17
GO:0033227	dsRNA transport	biological_process	0.41418	1	2	3149	8	20255	1.01115e+17
GO:0051032	nucleic acid transmembrane transporter activity	molecular_function	0.41418	1	2	3149	8	20255	1.01115e+17
GO:0051033	RNA transmembrane transporter activity	molecular_function	0.41418	1	2	3149	8	20255	1.01118e+17
GO:0003830	beta-1,4-mannosylglycoprotein 4-beta-N-acetylglucosaminyltransferase activity	molecular_function	0.41423	1	1	3149	3	20255	101123204
GO:0042175	nuclear outer membrane-endoplasmic reticulum membrane network	cellular_component	0.41469	1	34	3149	203	20255	101114715,105604186,101107383,101120760,101102424,101106367,101112476,101114641,101103725,101114396,101114909,101118296,101117462,101105174,101116165,101121793,101104838,101102863,106990133,101108768,101116998,101109090,101122168,101105838,443364,100302099,101105271,101110857,443064,101108987,101122806,105614591,101117435,101110797
GO:0019203	carbohydrate phosphatase activity	molecular_function	0.41511	1	2	3149	9	20255	1.01109e+17
GO:0050308	sugar-phosphatase activity	molecular_function	0.41511	1	2	3149	9	20255	1.01109e+17
GO:0046983	protein dimerization activity	molecular_function	0.41514	1	57	3149	349	20255	101106403,101114662,101113252,101110219,101112046,101115258,101112716,101105836,100526785,101103410,101102760,101114717,101109301,780450,101122784,101118277,101123372,101111035,101119467,101102584,105604626,101110495,101120713,101114034,100135687,105612424,105602432,101107427,101119381,100188930,101120384,101108185,101122908,101116107,101116087,101111791,101111010,101104393,101109024,101102621,10…
GO:0004345	glucose-6-phosphate dehydrogenase activity	molecular_function	0.41527	1	1	3149	3	20255	443211
GO:0022891	substrate-specific transmembrane transporter activity	molecular_function	0.41533	1	205	3149	1241	20255	101122427,101112591,101119467,105603946,101113636,101118435,101109816,101117208,101121389,101116562,101120286,101118911,101113195,101120360,101116416,101107725,101121535,101121868,101103020,101120243,101111476,101115663,101120350,101122169,443488,101122747,101110429,101113094,101120711,101114721,101110363,101114005,101120011,101104736,101119497,101104181,101108864,101117397,101114065,101121330,10…
GO:0003727	single-stranded RNA binding	molecular_function	0.41548	1	1	3149	3	20255	101104626
GO:0000281	mitotic cytokinesis	biological_process	0.41624	1	17	3149	100	20255	1.01103e+149
GO:0061640	cytoskeleton-dependent cytokinesis	biological_process	0.41624	1	17	3149	100	20255	1.01123e+149
GO:0016651	oxidoreductase activity, acting on NAD(P)H	molecular_function	0.4165	1	29	3149	171	20255	101106756,101102382,101118963,101107354,101109075,101105162,101103190,101110137,101122926,100270720,101111462,101107484,101103337,101115150,101121851,101113565,101108428,101118731,100415906,101119939,101105559,101113220,101120041,101118398,106991886,101114707,101110604,101114273,101111575
GO:0016568	chromatin modification	biological_process	0.41655	1	13	3149	71	20255	1.01105e+116
GO:0031123	RNA 3'-end processing	biological_process	0.41665	1	4	3149	21	20255	1.01122e+35
GO:0044057	regulation of system process	biological_process	0.41682	1	7	3149	37	20255	1.01106e+62
GO:0001503	ossification	biological_process	0.41744	1	6	3149	32	20255	1.01103e+53
GO:0004812	aminoacyl-tRNA ligase activity	molecular_function	0.4178	1	13	3149	72	20255	1.01109e+116
GO:0004807	triose-phosphate isomerase activity	molecular_function	0.41807	1	1	3149	4	20255	101121460
GO:0008855	exodeoxyribonuclease VII activity	molecular_function	0.41849	1	19	3149	110	20255	1.01103e+170
GO:0043624	cellular protein complex disassembly	biological_process	0.41851	1	7	3149	39	20255	1.00307e+62
GO:0008287	protein serine/threonine phosphatase complex	cellular_component	0.41922	1	3	3149	14	20255	1.01111e+26
GO:1903293	phosphatase complex	cellular_component	0.41922	1	3	3149	14	20255	1.01105e+26
GO:0050852	T cell receptor signaling pathway	biological_process	0.41959	1	2	3149	9	20255	1.05602e+17
GO:0006720	isoprenoid metabolic process	biological_process	0.42035	1	8	3149	44	20255	1.01119e+71
GO:0008299	isoprenoid biosynthetic process	biological_process	0.42035	1	8	3149	44	20255	1.01114e+71
GO:0009521	photosystem	cellular_component	0.42099	1	18	3149	107	20255	1.01113e+161
GO:0008083	growth factor activity	molecular_function	0.42168	1	21	3149	124	20255	7.8046e+179
GO:0050385	ureidoglycolate lyase activity	molecular_function	0.42222	1	1	3149	3	20255	100307044
GO:0030545	receptor regulator activity	molecular_function	0.42244	1	4	3149	20	20255	1.05616e+32
GO:0030547	receptor inhibitor activity	molecular_function	0.42244	1	4	3149	20	20255	1.05616e+32
GO:0030548	acetylcholine receptor regulator activity	molecular_function	0.42244	1	4	3149	20	20255	4.43302e+32
GO:0030550	acetylcholine receptor inhibitor activity	molecular_function	0.42244	1	4	3149	20	20255	1.05616e+32
GO:0022857	transmembrane transporter activity	molecular_function	0.42252	1	239	3149	1445	20255	101108370,101102663,101119004,100302356,101107704,101109587,101102386,101118063,101104154,101111534,101123662,101120920,101117260,100820755,101110043,101121711,101117157,101123290,101114673,101121414,101111209,101115580,101101870,101122716,100302077,101102319,106991156,101114819,101105271,101118126,101111981,106991125,101113879,101115315,106991756,101108715,101102327,101112132,101118299,101103470…
GO:0002218	activation of innate immune response	biological_process	0.42428	1	1	3149	3	20255	100127211
GO:0031349	positive regulation of defense response	biological_process	0.42428	1	1	3149	3	20255	100127211
GO:0032479	regulation of type I interferon production	biological_process	0.42428	1	1	3149	3	20255	100127211
GO:0032481	positive regulation of type I interferon production	biological_process	0.42428	1	1	3149	3	20255	100127211
GO:0032606	type I interferon production	biological_process	0.42428	1	1	3149	3	20255	100127211
GO:0045089	positive regulation of innate immune response	biological_process	0.42428	1	1	3149	3	20255	100127211
GO:0016725	oxidoreductase activity, acting on CH or CH2 groups	molecular_function	0.4247	1	3	3149	15	20255	1.01108e+26
GO:0015291	secondary active transmembrane transporter activity	molecular_function	0.42634	1	17	3149	95	20255	1.01105e+149
GO:0018022	peptidyl-lysine methylation	biological_process	0.42667	1	3	3149	14	20255	1.01124e+26
GO:0034968	histone lysine methylation	biological_process	0.42667	1	3	3149	14	20255	1.0112e+26
GO:0004113	2',3'-cyclic-nucleotide 3'-phosphodiesterase activity	molecular_function	0.42695	1	1	3149	3	20255	101120879
GO:0034357	photosynthetic membrane	cellular_component	0.42753	1	21	3149	125	20255	1.01111e+188
GO:0042618	poly-hydroxybutyrate metabolic process	biological_process	0.42763	1	1	3149	3	20255	101120264
GO:0042619	poly-hydroxybutyrate biosynthetic process	biological_process	0.42763	1	1	3149	3	20255	101120264
GO:1901440	poly(hydroxyalkanoate) metabolic process	biological_process	0.42763	1	1	3149	3	20255	101120264
GO:1901441	poly(hydroxyalkanoate) biosynthetic process	biological_process	0.42763	1	1	3149	3	20255	101120264
GO:0005048	signal sequence binding	molecular_function	0.42795	1	2	3149	9	20255	1.01102e+17
GO:0007340	acrosome reaction	biological_process	0.42834	1	2	3149	10	20255	1.00302e+17
GO:0007342	fusion of sperm to egg plasma membrane	biological_process	0.42834	1	2	3149	10	20255	1.00302e+17
GO:0017156	calcium ion-dependent exocytosis	biological_process	0.42834	1	2	3149	10	20255	1.01104e+17
GO:0045026	plasma membrane fusion	biological_process	0.42834	1	2	3149	10	20255	1.01104e+17
GO:0004743	pyruvate kinase activity	molecular_function	0.42879	1	1	3149	3	20255	101110196
GO:1901605	alpha-amino acid metabolic process	biological_process	0.42906	1	26	3149	154	20255	1.01123e+227
GO:0004089	carbonate dehydratase activity	molecular_function	0.42947	1	1	3149	3	20255	101106373
GO:0010256	endomembrane system organization	biological_process	0.43001	1	11	3149	61	20255	1.01114e+98
GO:0015081	sodium ion transmembrane transporter activity	molecular_function	0.4312	1	19	3149	108	20255	1.01123e+167
GO:0004715	non-membrane spanning protein tyrosine kinase activity	molecular_function	0.43123	1	1	3149	3	20255	101114356
GO:0051345	positive regulation of hydrolase activity	biological_process	0.43129	1	3	3149	14	20255	1.01122e+26
GO:0003887	DNA-directed DNA polymerase activity	molecular_function	0.4318	1	17	3149	99	20255	1.0111e+152
GO:0042974	retinoic acid receptor binding	molecular_function	0.43266	1	1	3149	3	20255	101115931
GO:0003917	DNA topoisomerase type I activity	molecular_function	0.4328	1	1	3149	4	20255	101114532
GO:0004348	glucosylceramidase activity	molecular_function	0.43372	1	1	3149	3	20255	101117379
GO:0008883	glutamyl-tRNA reductase activity	molecular_function	0.43415	1	1	3149	3	20255	101103527
GO:0009584	detection of visible light	biological_process	0.43415	1	1	3149	3	20255	101122041
GO:0012502	induction of programmed cell death	biological_process	0.43415	1	1	3149	3	20255	101119070
GO:0016657	oxidoreductase activity, acting on NAD(P)H, nitrogenous group as acceptor	molecular_function	0.43415	1	1	3149	3	20255	101105162
GO:0018298	protein-chromophore linkage	biological_process	0.43415	1	1	3149	3	20255	101122041
GO:0019051	induction by virus of host apoptotic process	biological_process	0.43415	1	1	3149	3	20255	101119070
GO:0031343	positive regulation of cell killing	biological_process	0.43415	1	1	3149	3	20255	101119070
GO:0033739	preQ1 synthase activity	molecular_function	0.43415	1	1	3149	3	20255	101105162
GO:0043902	positive regulation of multi-organism process	biological_process	0.43415	1	1	3149	3	20255	101119070
GO:0044533	positive regulation of apoptotic process in other organism	biological_process	0.43415	1	1	3149	3	20255	101119070
GO:0051709	regulation of killing of cells of other organism	biological_process	0.43415	1	1	3149	3	20255	101119070
GO:0051712	positive regulation of killing of cells of other organism	biological_process	0.43415	1	1	3149	3	20255	101119070
GO:0052042	positive regulation by symbiont of host programmed cell death	biological_process	0.43415	1	1	3149	3	20255	101119070
GO:0052151	positive regulation by symbiont of host apoptotic process	biological_process	0.43415	1	1	3149	3	20255	101119070
GO:0052330	positive regulation by organism of programmed cell death in other organism involved in symbiotic interaction	biological_process	0.43415	1	1	3149	3	20255	101119070
GO:0052501	positive regulation by organism of apoptotic process in other organism involved in symbiotic interaction	biological_process	0.43415	1	1	3149	3	20255	101119070
GO:0060139	positive regulation of apoptotic process by virus	biological_process	0.43415	1	1	3149	3	20255	101119070
GO:0001000	bacterial-type RNA polymerase core enzyme binding	molecular_function	0.43415	1	1	3149	3	20255	101111739
GO:0004411	homogentisate 1,2-dioxygenase activity	molecular_function	0.43415	1	1	3149	3	20255	101123619
GO:0005521	lamin binding	molecular_function	0.43415	1	1	3149	3	20255	101117012
GO:0006559	L-phenylalanine catabolic process	biological_process	0.43415	1	1	3149	3	20255	101123619
GO:0008685	2-C-methyl-D-erythritol 2,4-cyclodiphosphate synthase activity	molecular_function	0.43415	1	1	3149	3	20255	101120041
GO:0016717	oxidoreductase activity, acting on paired donors, with oxidation of a pair of donors resulting in the reduction of molecular oxygen to two molecules of water	molecular_function	0.43415	1	1	3149	3	20255	100505404
GO:0019646	aerobic electron transport chain	biological_process	0.43415	1	1	3149	3	20255	101121988
GO:0043175	RNA polymerase core enzyme binding	molecular_function	0.43415	1	1	3149	3	20255	101111739
GO:0070063	RNA polymerase binding	molecular_function	0.43415	1	1	3149	3	20255	101111739
GO:1902222	erythrose 4-phosphate/phosphoenolpyruvate family amino acid catabolic process	biological_process	0.43415	1	1	3149	3	20255	101123619
GO:0015370	solute:sodium symporter activity	molecular_function	0.43424	1	7	3149	37	20255	1.01123e+62
GO:0006605	protein targeting	biological_process	0.4356	1	43	3149	256	20255	101106535,101105069,101111605,101118296,101109308,101115800,101111271,101115580,101107341,443415,106990803,101112901,101110490,101109499,101114715,101107561,101104887,100526782,101123290,100294614,101109430,101104605,101108182,101105877,101112716,101105836,100526785,101107621,101110219,100526780,105614591,101113997,100141296,101118606,101111791,101111010,101116568,101108814,101116107,101110495,10…
GO:0000287	magnesium ion binding	molecular_function	0.43596	1	16	3149	93	20255	1.01112e+143
GO:0046527	glucosyltransferase activity	molecular_function	0.43622	1	3	3149	14	20255	1.01111e+26
GO:0043241	protein complex disassembly	biological_process	0.4366	1	8	3149	46	20255	1.01113e+71
GO:0005230	extracellular ligand-gated ion channel activity	molecular_function	0.43727	1	17	3149	96	20255	1.01114e+152
GO:0022843	voltage-gated cation channel activity	molecular_function	0.43745	1	17	3149	98	20255	1.01111e+152
GO:0061024	membrane organization	biological_process	0.43761	1	35	3149	209	20255	101107561,101114715,101104246,101115580,101123290,101104887,101118913,101109895,101105503,101106535,101119308,101107633,100302356,101118296,101110694,101116568,101113997,101113132,101115931,101117047,101105877,101114381,101108182,101122048,101103527,101110526,101106774,105614591,101107228,101116413,101120777,101114662,101117435,101107621,101118112
GO:0015293	symporter activity	molecular_function	0.43868	1	9	3149	49	20255	1.01117e+80
GO:0015294	solute:cation symporter activity	molecular_function	0.43868	1	9	3149	49	20255	1.01105e+80
GO:0022804	active transmembrane transporter activity	molecular_function	0.43925	1	41	3149	241	20255	101117113,101108763,101115303,101110043,101121821,101115623,101121046,101101873,101114037,101115580,100145863,101109665,101108539,494435,101121462,101118063,100305130,101108719,101121256,101105069,101104799,101110357,101120259,101109235,101113132,101119252,101121516,106991387,101115063,101107510,101115628,101104534,101107725,101106333,101109116,101116166,101105536,101112932,101122930,101115097,10…
GO:0015099	nickel cation transmembrane transporter activity	molecular_function	0.43963	1	2	3149	9	20255	1.01109e+17
GO:0015675	nickel cation transport	biological_process	0.43963	1	2	3149	9	20255	1.01112e+17
GO:0035444	nickel cation transmembrane transport	biological_process	0.43963	1	2	3149	9	20255	1.01109e+17
GO:0048013	ephrin receptor signaling pathway	biological_process	0.43991	1	3	3149	14	20255	1.01111e+26
GO:0006415	translational termination	biological_process	0.44028	1	4	3149	21	20255	1.00307e+35
GO:0016972	thiol oxidase activity	molecular_function	0.44076	1	4	3149	21	20255	1.01117e+35
GO:0055085	transmembrane transport	biological_process	0.44242	1	158	3149	953	20255	101116026,101105120,101102115,101108586,101122020,101111605,101107771,101122655,101109308,101113317,101106421,105613829,101116428,101112942,101117004,101123513,101106817,101112172,101110253,101116166,101105836,101112932,101112776,105615769,101114431,101112696,101111411,101111791,101118606,101108923,101121793,101110650,105604604,101116360,101122065,101116998,101123476,101111534,101105154,101120920…
GO:0035556	intracellular signal transduction	biological_process	0.44268	1	138	3149	832	20255	101109813,101123118,101117815,100302308,101107664,101102612,101120590,101119215,101116194,101118025,101121465,101105602,101110078,101110637,101110410,105602068,101117755,101117012,101106288,101111242,101123030,101119743,101107175,101112406,101121677,101116859,101121976,101109534,106990803,101109873,101105381,101118724,101122850,100147794,101118115,101104530,101106774,101114472,101122943,101122169…
GO:0030054	cell junction	cellular_component	0.44344	1	7	3149	38	20255	1.01115e+59
GO:0044432	endoplasmic reticulum part	cellular_component	0.44394	1	34	3149	206	20255	101110797,105614591,101117435,443064,101110857,101108987,101105271,101122806,101105838,443364,101122168,100302099,101116998,101109090,101104838,106990133,101102863,101108768,101121793,101116165,101114909,101105174,101118296,101117462,101114396,101112476,101103725,101114641,101120760,101102424,101107383,105604186,101106367,101114715
GO:0043903	regulation of symbiosis, encompassing mutualism through parasitism	biological_process	0.44422	1	4	3149	21	20255	1.01123e+35
GO:0019752	carboxylic acid metabolic process	biological_process	0.44456	1	77	3149	464	20255	101103906,101118372,101116797,101119091,101106567,101121460,101102594,101107269,101117520,106990131,101123073,443489,101105117,101117198,101107664,106991756,101121788,101107679,101111894,101110196,101102225,101123345,101102779,101110490,100037684,105615152,101103614,101103696,101114460,101113775,101111009,100135438,101119743,101119070,101108691,443005,101105872,101108201,101102207,105616433,10110…
GO:0034702	ion channel complex	cellular_component	0.44456	1	7	3149	38	20255	1.01115e+62
GO:0034703	cation channel complex	cellular_component	0.44456	1	7	3149	38	20255	1.01115e+62
GO:0015930	glutamate synthase activity	molecular_function	0.44498	1	2	3149	9	20255	1.01115e+17
GO:0000785	chromatin	cellular_component	0.44659	1	9	3149	61	20255	1.01106e+80
GO:0018205	peptidyl-lysine modification	biological_process	0.44803	1	5	3149	26	20255	1.01123e+44
GO:0022892	substrate-specific transporter activity	molecular_function	0.44915	1	218	3149	1327	20255	101110406,101107249,101111271,101121462,101114004,101110004,100294596,101102707,101110357,101108142,101112587,101104552,100526782,101114005,101120011,101113094,101122747,101110429,101120711,101114721,101110363,101121330,101114065,101105172,101107038,101106170,101107733,101119497,101104736,101104181,101108864,101117397,101107298,101121535,101103020,101121868,101116416,101107725,443488,101120243,10…
GO:0009878	nodule morphogenesis	biological_process	0.44994	1	2	3149	9	20255	1.01114e+17
GO:0009886	post-embryonic morphogenesis	biological_process	0.44994	1	2	3149	9	20255	1.01114e+17
GO:0044111	development involved in symbiotic interaction	biological_process	0.44994	1	2	3149	9	20255	1.01104e+17
GO:0031012	extracellular matrix	cellular_component	0.44995	1	35	3149	207	20255	101115915,101107749,101119580,100127216,101111183,101105159,101103859,101106490,101111693,101108609,101108346,101108855,101103901,101113485,101105076,101121668,101106565,101108297,101111598,101120979,101110367,101110364,101110395,101118172,101106305,101109113,101114659,101110970,101104023,101104709,101106232,100196905,101104541,101120574,101116580
GO:0001906	cell killing	biological_process	0.45001	1	4	3149	20	20255	1.01119e+32
GO:0001614	purinergic nucleotide receptor activity	molecular_function	0.45076	1	2	3149	9	20255	1.01116e+17
GO:0004931	extracellular ATP-gated cation channel activity	molecular_function	0.45076	1	2	3149	9	20255	1.01116e+17
GO:0010243	response to organonitrogen compound	biological_process	0.45076	1	2	3149	9	20255	1.01116e+17
GO:0014074	response to purine-containing compound	biological_process	0.45076	1	2	3149	9	20255	1.01116e+17
GO:0016502	nucleotide receptor activity	molecular_function	0.45076	1	2	3149	9	20255	1.01116e+17
GO:0033198	response to ATP	biological_process	0.45076	1	2	3149	9	20255	1.01116e+17
GO:0035381	ATP-gated ion channel activity	molecular_function	0.45076	1	2	3149	9	20255	1.0111e+17
GO:0035586	purinergic receptor activity	molecular_function	0.45076	1	2	3149	9	20255	1.01116e+17
GO:0046683	response to organophosphorus	biological_process	0.45076	1	2	3149	9	20255	1.01116e+17
GO:0042546	cell wall biogenesis	biological_process	0.45099	1	2	3149	9	20255	1.01104e+17
GO:0016929	SUMO-specific protease activity	molecular_function	0.451	1	3	3149	16	20255	1.01107e+26
GO:0032183	SUMO binding	molecular_function	0.451	1	3	3149	16	20255	1.01115e+26
GO:0070122	isopeptidase activity	molecular_function	0.451	1	3	3149	16	20255	1.01114e+26
GO:0070138	ubiquitin-like protein-specific isopeptidase activity	molecular_function	0.451	1	3	3149	16	20255	1.01114e+26
GO:0070140	SUMO-specific isopeptidase activity	molecular_function	0.451	1	3	3149	16	20255	1.01114e+26
GO:0030153	bacteriocin immunity	biological_process	0.45102	1	4	3149	21	20255	1.01107e+35
GO:0006493	protein O-linked glycosylation	biological_process	0.45168	1	2	3149	9	20255	1.01114e+17
GO:0006900	membrane budding	biological_process	0.4517	1	2	3149	9	20255	1.01119e+17
GO:0006901	vesicle coating	biological_process	0.4517	1	2	3149	9	20255	1.01117e+17
GO:0007212	dopamine receptor signaling pathway	biological_process	0.4517	1	2	3149	9	20255	1.01119e+17
GO:0030276	clathrin binding	molecular_function	0.4517	1	2	3149	9	20255	1.01119e+17
GO:0032051	clathrin light chain binding	molecular_function	0.4517	1	2	3149	9	20255	1.01117e+17
GO:0048268	clathrin coat assembly	biological_process	0.4517	1	2	3149	9	20255	1.01119e+17
GO:0030488	tRNA methylation	biological_process	0.45196	1	3	3149	16	20255	1.01103e+26
GO:0031515	tRNA (m1A) methyltransferase complex	cellular_component	0.45196	1	3	3149	16	20255	1.01102e+26
GO:0034708	methyltransferase complex	cellular_component	0.45196	1	3	3149	16	20255	1.01102e+26
GO:0043527	tRNA methyltransferase complex	cellular_component	0.45196	1	3	3149	16	20255	1.01102e+26
GO:0006813	potassium ion transport	biological_process	0.45334	1	23	3149	135	20255	1.01105e+206
GO:0051537	2 iron, 2 sulfur cluster binding	molecular_function	0.45353	1	10	3149	57	20255	1.01104e+89
GO:0006418	tRNA aminoacylation for protein translation	biological_process	0.45374	1	13	3149	74	20255	1.01119e+116
GO:0051090	regulation of sequence-specific DNA binding transcription factor activity	biological_process	0.45384	1	2	3149	9	20255	1.01113e+17
GO:0019751	polyol metabolic process	biological_process	0.45434	1	3	3149	15	20255	1.01106e+26
GO:0006848	pyruvate transport	biological_process	0.45466	1	2	3149	10	20255	1.01116e+17
GO:0006850	mitochondrial pyruvate transport	biological_process	0.45466	1	2	3149	10	20255	1.01116e+17
GO:0031406	carboxylic acid binding	molecular_function	0.4569	1	4	3149	21	20255	1.01102e+35
GO:0043177	organic acid binding	molecular_function	0.4569	1	4	3149	21	20255	1.01102e+35
GO:0009496	plastoquinol--plastocyanin reductase activity	molecular_function	0.45755	1	2	3149	9	20255	1.0112e+17
GO:0052880	oxidoreductase activity, acting on diphenols and related substances as donors, with copper protein as acceptor	molecular_function	0.45755	1	2	3149	9	20255	1.0112e+17
GO:0032101	regulation of response to external stimulus	biological_process	0.45759	1	5	3149	27	20255	1.01114e+44
GO:0051082	unfolded protein binding	molecular_function	0.45763	1	22	3149	135	20255	1.06991e+197
GO:0000213	tRNA-intron endonuclease activity	molecular_function	0.45776	1	2	3149	9	20255	1.01104e+17
GO:0016805	dipeptidase activity	molecular_function	0.45823	1	2	3149	9	20255	1.01107e+17
GO:0010883	regulation of lipid storage	biological_process	0.45921	1	4	3149	21	20255	1.01103e+35
GO:0010884	positive regulation of lipid storage	biological_process	0.45921	1	4	3149	21	20255	1.01102e+35
GO:0072594	establishment of protein localization to organelle	biological_process	0.45972	1	37	3149	222	20255	101109308,101111271,101106535,101105069,101111605,100526782,101104887,101123290,101109430,100294614,101115580,443415,101107341,106990803,101112901,101110490,101107561,101112716,101107621,101105836,100526785,101110219,100526780,101108182,101105877,101107427,100302307,101110495,101115931,101113997,100141296,101111010,101116568,101111791,101118606,101108814,101116107
GO:0043412	macromolecule modification	biological_process	0.46027	1	268	3149	1635	20255	101105529,101116512,443005,101109302,101105420,101117511,101112720,101102402,105605969,101112991,101102088,101115047,101106834,101107546,101110186,101113846,101107679,101117198,101114784,101103705,105604182,101123191,101121465,101118235,100885761,101114993,101110378,101110406,101109481,101102182,101104393,101113048,101112476,101103083,101102334,105616627,101113029,101103797,101104734,101106960,10…
GO:0000746	conjugation	biological_process	0.46039	1	4	3149	21	20255	1.0111e+35
GO:0008757	S-adenosylmethionine-dependent methyltransferase activity	molecular_function	0.46076	1	20	3149	119	20255	1.01103e+179
GO:0015631	tubulin binding	molecular_function	0.46139	1	26	3149	153	20255	1.01123e+224
GO:0031505	fungal-type cell wall organization	biological_process	0.46246	1	1	3149	4	20255	101122954
GO:0071852	fungal-type cell wall organization or biogenesis	biological_process	0.46246	1	1	3149	4	20255	101122954
GO:0051179	localization	biological_process	0.46289	1	487	3149	2983	20255	101118435,105603946,101113636,101114034,101111755,101107427,101112591,101111129,101108359,101120780,101116562,101109709,101115063,101113461,100141296,101118730,101102611,101116107,101123422,101120924,101117208,101107298,101121868,101103020,101115897,101101923,101122951,101106699,101118622,101116551,101106442,101108426,443488,101106373,101121264,101112094,101120350,101120100,101120243,101111476,10…
GO:0032507	maintenance of protein location in cell	biological_process	0.46354	1	5	3149	27	20255	1.01115e+44
GO:0045185	maintenance of protein location	biological_process	0.46354	1	5	3149	27	20255	1.01102e+44
GO:0051651	maintenance of location in cell	biological_process	0.46354	1	5	3149	27	20255	1.01115e+44
GO:0042558	pteridine-containing compound metabolic process	biological_process	0.46384	1	5	3149	27	20255	1.01108e+44
GO:0043244	regulation of protein complex disassembly	biological_process	0.46391	1	5	3149	29	20255	1.01113e+44
GO:0046782	regulation of viral transcription	biological_process	0.46404	1	1	3149	4	20255	101115254
GO:1903900	regulation of viral life cycle	biological_process	0.46404	1	1	3149	4	20255	101115254
GO:0032984	macromolecular complex disassembly	biological_process	0.46451	1	8	3149	47	20255	1.01107e+71
GO:0004529	exodeoxyribonuclease activity	molecular_function	0.46501	1	19	3149	113	20255	1.01117e+170
GO:0016895	exodeoxyribonuclease activity, producing 5'-phosphomonoesters	molecular_function	0.46501	1	19	3149	113	20255	1.0112e+170
GO:0008217	regulation of blood pressure	biological_process	0.46524	1	2	3149	9	20255	1.0112e+17
GO:0042311	vasodilation	biological_process	0.46524	1	2	3149	9	20255	1.01115e+17
GO:0042312	regulation of vasodilation	biological_process	0.46524	1	2	3149	9	20255	1.01115e+17
GO:0043086	negative regulation of catalytic activity	biological_process	0.46756	1	12	3149	71	20255	1.00101e+104
GO:0044092	negative regulation of molecular function	biological_process	0.46756	1	12	3149	71	20255	1.01113e+104
GO:0006449	regulation of translational termination	biological_process	0.46908	1	1	3149	4	20255	100307039
GO:0006452	translational frameshifting	biological_process	0.46908	1	1	3149	4	20255	100307039
GO:0034250	positive regulation of cellular amide metabolic process	biological_process	0.46908	1	1	3149	4	20255	100307039
GO:0043243	positive regulation of protein complex disassembly	biological_process	0.46908	1	1	3149	4	20255	100307039
GO:0045727	positive regulation of translation	biological_process	0.46908	1	1	3149	4	20255	100307039
GO:0045901	positive regulation of translational elongation	biological_process	0.46908	1	1	3149	4	20255	100307039
GO:0045905	positive regulation of translational termination	biological_process	0.46908	1	1	3149	4	20255	100307039
GO:0030955	potassium ion binding	molecular_function	0.46929	1	6	3149	33	20255	1.0111e+53
GO:0031420	alkali metal ion binding	molecular_function	0.46929	1	6	3149	33	20255	1.01111e+53
GO:0008509	anion transmembrane transporter activity	molecular_function	0.47024	1	23	3149	135	20255	1.01106e+206
GO:0000096	sulfur amino acid metabolic process	biological_process	0.47056	1	3	3149	15	20255	1.01106e+26
GO:0003880	protein C-terminal carboxyl O-methyltransferase activity	molecular_function	0.47246	1	1	3149	4	20255	101117687
GO:0004671	protein C-terminal S-isoprenylcysteine carboxyl O-methyltransferase activity	molecular_function	0.47246	1	1	3149	4	20255	101117687
GO:0006481	C-terminal protein methylation	biological_process	0.47246	1	1	3149	4	20255	101117687
GO:0018410	C-terminal protein amino acid modification	biological_process	0.47246	1	1	3149	4	20255	101117687
GO:0043687	post-translational protein modification	biological_process	0.47246	1	1	3149	4	20255	101117687
GO:0016894	endonuclease activity, active with either ribo- or deoxyribonucleic acids and producing 3'-phosphomonoesters	molecular_function	0.4729	1	3	3149	16	20255	1.01105e+26
GO:0000347	THO complex	cellular_component	0.47292	1	4	3149	22	20255	1.01123e+35
GO:0004789	thiamine-phosphate diphosphorylase activity	molecular_function	0.47371	1	2	3149	9	20255	1.05607e+17
GO:0006020	inositol metabolic process	biological_process	0.47476	1	1	3149	4	20255	101120130
GO:0044801	single-organism membrane fusion	biological_process	0.47692	1	7	3149	42	20255	1.01119e+62
GO:0003676	nucleic acid binding	molecular_function	0.47694	1	599	3149	3796	20255	101121480,100192430,101108848,101113844,101102646,443299,101107783,101102555,101111926,101118095,101104663,101110302,101108595,101110783,101117434,101115254,101112735,101104055,101109297,101112494,101102838,101113475,101119197,101118203,101111348,101104081,101116194,101110951,101106882,101117125,101106333,101121163,101119941,101111240,101115414,101117087,101112356,101106050,101119156,105613453,10…
GO:0004749	ribose phosphate diphosphokinase activity	molecular_function	0.47698	1	2	3149	10	20255	1.01117e+17
GO:0015097	mercury ion transmembrane transporter activity	molecular_function	0.47716	1	3	3149	15	20255	4.97272e+23
GO:0015694	mercury ion transport	biological_process	0.47716	1	3	3149	15	20255	4.97272e+23
GO:0046689	response to mercury ion	biological_process	0.47716	1	3	3149	15	20255	1.01109e+23
GO:0050787	detoxification of mercury ion	biological_process	0.47716	1	3	3149	15	20255	1.0112e+23
GO:0035257	nuclear hormone receptor binding	molecular_function	0.4772	1	2	3149	9	20255	1.01116e+17
GO:0051427	hormone receptor binding	molecular_function	0.4772	1	2	3149	9	20255	1.01116e+17
GO:0006749	glutathione metabolic process	biological_process	0.47743	1	3	3149	15	20255	1.01115e+26
GO:0030150	protein import into mitochondrial matrix	biological_process	0.47771	1	2	3149	10	20255	1.01109e+17
GO:0006606	protein import into nucleus	biological_process	0.4782	1	23	3149	138	20255	1.01105e+203
GO:0034504	protein localization to nucleus	biological_process	0.4782	1	23	3149	138	20255	1.00295e+203
GO:0044744	protein targeting to nucleus	biological_process	0.4782	1	23	3149	138	20255	1.0111e+203
GO:0051170	nuclear import	biological_process	0.4782	1	23	3149	138	20255	1.01112e+203
GO:1902593	single-organism nuclear import	biological_process	0.4782	1	23	3149	138	20255	1.01105e+203
GO:0009523	photosystem II	cellular_component	0.47838	1	14	3149	86	20255	1.01115e+125
GO:1902580	single-organism cellular localization	biological_process	0.47843	1	43	3149	260	20255	101108814,101116107,100141296,101113997,101116568,101111010,101111791,101118606,101115931,101107427,100302307,101110495,101108182,101105877,101110219,101120777,105614591,100526780,101112716,101107621,100526785,101105836,101110490,101112901,101114715,101107561,101115580,106990803,443415,101107341,101123290,101109430,100294614,100526782,101104887,101111605,101105069,101106535,101105503,101113317,10…
GO:0016891	endoribonuclease activity, producing 5'-phosphomonoesters	molecular_function	0.47893	1	11	3149	67	20255	1.05616e+98
GO:0046649	lymphocyte activation	biological_process	0.47911	1	2	3149	10	20255	1.01116e+17
GO:0005744	mitochondrial inner membrane presequence translocase complex	cellular_component	0.48017	1	1	3149	4	20255	101118606
GO:0046429	4-hydroxy-3-methylbut-2-en-1-yl diphosphate synthase activity	molecular_function	0.48136	1	1	3149	4	20255	101114411
GO:0052592	oxidoreductase activity, acting on CH or CH2 groups, with an iron-sulfur protein as acceptor	molecular_function	0.48136	1	1	3149	4	20255	101114411
GO:0016728	oxidoreductase activity, acting on CH or CH2 groups, disulfide as acceptor	molecular_function	0.48161	1	2	3149	10	20255	1.01122e+17
GO:0015079	potassium ion transmembrane transporter activity	molecular_function	0.48165	1	22	3149	131	20255	1.01105e+197
GO:0044262	cellular carbohydrate metabolic process	biological_process	0.48251	1	10	3149	59	20255	1.01103e+89
GO:0016247	channel regulator activity	molecular_function	0.48265	1	25	3149	148	20255	1.01123e+218
GO:0008234	cysteine-type peptidase activity	molecular_function	0.48485	1	32	3149	192	20255	101110970,101115297,101116449,101109460,101113966,101104453,100913169,101112199,101108614,101104198,101105032,101106834,101106914,101123155,780470,101110464,101108430,101104136,100127211,780471,105603308,101123643,101110953,101112192,101114871,101102635,101119187,101113782,101112735,101114202,101104761,101122671
GO:0045735	nutrient reservoir activity	molecular_function	0.48512	1	4	3149	22	20255	1.01106e+35
GO:0046813	receptor-mediated virion attachment to host cell	biological_process	0.48622	1	1	3149	4	20255	101118112
GO:0006414	translational elongation	biological_process	0.48629	1	5	3149	32	20255	4.43504e+41
GO:0047661	amino-acid racemase activity	molecular_function	0.4863	1	1	3149	4	20255	101102239
GO:1901068	guanosine-containing compound metabolic process	biological_process	0.48698	1	3	3149	16	20255	1.01112e+26
GO:1901070	guanosine-containing compound biosynthetic process	biological_process	0.48698	1	3	3149	16	20255	1.01102e+26
GO:0009064	glutamine family amino acid metabolic process	biological_process	0.48757	1	5	3149	28	20255	1.01107e+44
GO:0008408	3'-5' exonuclease activity	molecular_function	0.48825	1	7	3149	39	20255	1.01116e+62
GO:0000165	MAPK cascade	biological_process	0.48884	1	1	3149	4	20255	101123030
GO:0000186	activation of MAPKK activity	biological_process	0.48884	1	1	3149	4	20255	101123030
GO:0001678	cellular glucose homeostasis	biological_process	0.48884	1	1	3149	4	20255	101123030
GO:0008343	adult feeding behavior	biological_process	0.48884	1	1	3149	4	20255	101123030
GO:0023014	signal transduction by protein phosphorylation	biological_process	0.48884	1	1	3149	4	20255	101123030
GO:0030534	adult behavior	biological_process	0.48884	1	1	3149	4	20255	101123030
GO:0032094	response to food	biological_process	0.48884	1	1	3149	4	20255	101123030
GO:0032095	regulation of response to food	biological_process	0.48884	1	1	3149	4	20255	101123030
GO:0032096	negative regulation of response to food	biological_process	0.48884	1	1	3149	4	20255	101123030
GO:0032098	regulation of appetite	biological_process	0.48884	1	1	3149	4	20255	101123030
GO:0032099	negative regulation of appetite	biological_process	0.48884	1	1	3149	4	20255	101123030
GO:0032104	regulation of response to extracellular stimulus	biological_process	0.48884	1	1	3149	4	20255	101123030
GO:0032105	negative regulation of response to extracellular stimulus	biological_process	0.48884	1	1	3149	4	20255	101123030
GO:0032107	regulation of response to nutrient levels	biological_process	0.48884	1	1	3149	4	20255	101123030
GO:0032108	negative regulation of response to nutrient levels	biological_process	0.48884	1	1	3149	4	20255	101123030
GO:0032147	activation of protein kinase activity	biological_process	0.48884	1	1	3149	4	20255	101123030
GO:0033500	carbohydrate homeostasis	biological_process	0.48884	1	1	3149	4	20255	101123030
GO:0033674	positive regulation of kinase activity	biological_process	0.48884	1	1	3149	4	20255	101123030
GO:0042593	glucose homeostasis	biological_process	0.48884	1	1	3149	4	20255	101123030
GO:0043408	regulation of MAPK cascade	biological_process	0.48884	1	1	3149	4	20255	101123030
GO:0043410	positive regulation of MAPK cascade	biological_process	0.48884	1	1	3149	4	20255	101123030
GO:0044708	single-organism behavior	biological_process	0.48884	1	1	3149	4	20255	101123030
GO:0045860	positive regulation of protein kinase activity	biological_process	0.48884	1	1	3149	4	20255	101123030
GO:0051347	positive regulation of transferase activity	biological_process	0.48884	1	1	3149	4	20255	101123030
GO:0031411	gas vesicle	cellular_component	0.49157	1	2	3149	10	20255	1.01123e+17
GO:0005816	spindle pole body	cellular_component	0.49204	1	2	3149	10	20255	1.01121e+17
GO:0005823	central plaque of spindle pole body	cellular_component	0.49204	1	2	3149	10	20255	1.01104e+17
GO:0044450	microtubule organizing center part	cellular_component	0.49204	1	2	3149	10	20255	1.01121e+17
GO:0000014	single-stranded DNA endodeoxyribonuclease activity	molecular_function	0.49256	1	1	3149	4	20255	101106170
GO:1901607	alpha-amino acid biosynthetic process	biological_process	0.49358	1	17	3149	105	20255	1.01108e+146
GO:0032501	multicellular organismal process	biological_process	0.49387	1	135	3149	853	20255	101114953,101118299,101118372,101107885,101121702,101111010,101104674,101109471,101108297,101103135,101105159,101108877,101115323,101112260,105608895,106991649,101113866,101106490,100127211,101116876,101112247,105607318,101105209,101109430,101106286,101106156,101103389,101112876,101107995,101119556,101123199,100302356,105610024,101113775,101114458,101110722,100188930,101104153,101120384,101112831…
GO:0031122	cytoplasmic microtubule organization	biological_process	0.49428	1	1	3149	4	20255	101123647
GO:0035058	nonmotile primary cilium assembly	biological_process	0.49428	1	1	3149	4	20255	101123647
GO:0097546	ciliary base	cellular_component	0.49428	1	1	3149	4	20255	101123647
GO:0009522	photosystem I	cellular_component	0.49627	1	4	3149	22	20255	1.01122e+35
GO:0042173	regulation of sporulation resulting in formation of a cellular spore	biological_process	0.49735	1	1	3149	4	20255	100192423
GO:0043937	regulation of sporulation	biological_process	0.49735	1	1	3149	4	20255	100192423
GO:0043938	positive regulation of sporulation	biological_process	0.49735	1	1	3149	4	20255	100192423
GO:0045597	positive regulation of cell differentiation	biological_process	0.49735	1	1	3149	4	20255	100192423
GO:0045881	positive regulation of sporulation resulting in formation of a cellular spore	biological_process	0.49735	1	1	3149	4	20255	100192423
GO:0004609	phosphatidylserine decarboxylase activity	molecular_function	0.49782	1	1	3149	4	20255	101102024
GO:0030493	bacteriochlorophyll metabolic process	biological_process	0.49814	1	2	3149	10	20255	1.01108e+17
GO:0030494	bacteriochlorophyll biosynthetic process	biological_process	0.49814	1	2	3149	10	20255	1.01108e+17
GO:0017022	myosin binding	molecular_function	0.49848	1	1	3149	4	20255	101107786
GO:0031099	regeneration	biological_process	0.49853	1	3	3149	17	20255	1.01107e+26
GO:0042246	tissue regeneration	biological_process	0.49853	1	3	3149	17	20255	1.01117e+26
GO:0048589	developmental growth	biological_process	0.49853	1	3	3149	17	20255	1.01117e+26
GO:0004521	endoribonuclease activity	molecular_function	0.49929	1	13	3149	81	20255	1.05613e+116
GO:0044441	ciliary part	cellular_component	0.50038	1	2	3149	10	20255	1.01124e+17
GO:0019028	viral capsid	cellular_component	0.50167	1	67	3149	415	20255	101117014,101104181,101117700,100141297,101112157,100526782,101120390,101106605,101112476,101122129,101118731,101118957,101117891,101111271,101118911,101111791,100141296,101114630,101118043,101104657,101108482,101113589,101107427,101111755,101109088,105605705,101122804,101110526,101112716,101117175,101111683,101105986,101114845,101110490,106992022,100302076,101107406,105607318,101122520,101109430…
GO:0003854	3-beta-hydroxy-delta5-steroid dehydrogenase activity	molecular_function	0.50176	1	4	3149	22	20255	1.01106e+35
GO:0016229	steroid dehydrogenase activity	molecular_function	0.50176	1	4	3149	22	20255	1.00191e+35
GO:0033764	steroid dehydrogenase activity, acting on the CH-OH group of donors, NAD or NADP as acceptor	molecular_function	0.50176	1	4	3149	22	20255	1.01114e+35
GO:0003682	chromatin binding	molecular_function	0.50223	1	10	3149	65	20255	1.01123e+89
GO:0016413	O-acetyltransferase activity	molecular_function	0.50228	1	1	3149	4	20255	100913169
GO:0008430	selenium binding	molecular_function	0.50321	1	1	3149	4	20255	101111972
GO:0000271	polysaccharide biosynthetic process	biological_process	0.50322	1	5	3149	28	20255	1.01103e+44
GO:0017172	cysteine dioxygenase activity	molecular_function	0.50355	1	1	3149	4	20255	101105872
GO:0046439	L-cysteine metabolic process	biological_process	0.50355	1	1	3149	4	20255	101105872
GO:0007271	synaptic transmission, cholinergic	biological_process	0.50359	1	1	3149	4	20255	101121163
GO:0022898	regulation of transmembrane transporter activity	biological_process	0.50359	1	1	3149	4	20255	101121163
GO:0030431	sleep	biological_process	0.50359	1	1	3149	4	20255	101121163
GO:0032222	regulation of synaptic transmission, cholinergic	biological_process	0.50359	1	1	3149	4	20255	101121163
GO:0032409	regulation of transporter activity	biological_process	0.50359	1	1	3149	4	20255	101121163
GO:0032411	positive regulation of transporter activity	biological_process	0.50359	1	1	3149	4	20255	101121163
GO:0032412	regulation of ion transmembrane transporter activity	biological_process	0.50359	1	1	3149	4	20255	101121163
GO:0032414	positive regulation of ion transmembrane transporter activity	biological_process	0.50359	1	1	3149	4	20255	101121163
GO:0034235	GPI anchor binding	molecular_function	0.50359	1	1	3149	4	20255	101121163
GO:0034762	regulation of transmembrane transport	biological_process	0.50359	1	1	3149	4	20255	101121163
GO:0034764	positive regulation of transmembrane transport	biological_process	0.50359	1	1	3149	4	20255	101121163
GO:0034765	regulation of ion transmembrane transport	biological_process	0.50359	1	1	3149	4	20255	101121163
GO:0034767	positive regulation of ion transmembrane transport	biological_process	0.50359	1	1	3149	4	20255	101121163
GO:0043266	regulation of potassium ion transport	biological_process	0.50359	1	1	3149	4	20255	101121163
GO:0043268	positive regulation of potassium ion transport	biological_process	0.50359	1	1	3149	4	20255	101121163
GO:0043270	positive regulation of ion transport	biological_process	0.50359	1	1	3149	4	20255	101121163
GO:1901016	regulation of potassium ion transmembrane transporter activity	biological_process	0.50359	1	1	3149	4	20255	101121163
GO:1901018	positive regulation of potassium ion transmembrane transporter activity	biological_process	0.50359	1	1	3149	4	20255	101121163
GO:1901379	regulation of potassium ion transmembrane transport	biological_process	0.50359	1	1	3149	4	20255	101121163
GO:1901381	positive regulation of potassium ion transmembrane transport	biological_process	0.50359	1	1	3149	4	20255	101121163
GO:1903818	positive regulation of voltage-gated potassium channel activity	biological_process	0.50359	1	1	3149	4	20255	101121163
GO:1904062	regulation of cation transmembrane transport	biological_process	0.50359	1	1	3149	4	20255	101121163
GO:1904064	positive regulation of cation transmembrane transport	biological_process	0.50359	1	1	3149	4	20255	101121163
GO:2001257	regulation of cation channel activity	biological_process	0.50359	1	1	3149	4	20255	101121163
GO:2001259	positive regulation of cation channel activity	biological_process	0.50359	1	1	3149	4	20255	101121163
GO:0016811	hydrolase activity, acting on carbon-nitrogen (but not peptide) bonds, in linear amides	molecular_function	0.50407	1	5	3149	28	20255	1.01117e+44
GO:0003688	DNA replication origin binding	molecular_function	0.50451	1	2	3149	10	20255	1.0111e+17
GO:0009060	aerobic respiration	biological_process	0.50469	1	4	3149	22	20255	1.01114e+35
GO:0003989	acetyl-CoA carboxylase activity	molecular_function	0.50504	1	2	3149	11	20255	1.01106e+17
GO:0016421	CoA carboxylase activity	molecular_function	0.50504	1	2	3149	11	20255	1.0111e+17
GO:0016885	ligase activity, forming carbon-carbon bonds	molecular_function	0.50504	1	2	3149	11	20255	1.01106e+17
GO:0009095	aromatic amino acid family biosynthetic process, prephenate pathway	biological_process	0.50607	1	1	3149	5	20255	106991756
GO:0008094	DNA-dependent ATPase activity	molecular_function	0.50631	1	9	3149	55	20255	1.01113e+80
GO:0003777	microtubule motor activity	molecular_function	0.5077	1	12	3149	69	20255	1.01106e+107
GO:0036126	sperm flagellum	cellular_component	0.50855	1	1	3149	4	20255	101111312
GO:0097228	sperm principal piece	cellular_component	0.50855	1	1	3149	4	20255	101111312
GO:0033645	host cell endomembrane system	cellular_component	0.50869	1	1	3149	4	20255	101107931
GO:0033655	host cell cytoplasm part	cellular_component	0.50869	1	1	3149	4	20255	101107931
GO:0044165	host cell endoplasmic reticulum	cellular_component	0.50869	1	1	3149	4	20255	101107931
GO:0044167	host cell endoplasmic reticulum membrane	cellular_component	0.50869	1	1	3149	4	20255	101107931
GO:0044385	integral to membrane of host cell	cellular_component	0.50869	1	1	3149	4	20255	101107931
GO:0044386	integral to host endoplasmic reticulum membrane	cellular_component	0.50869	1	1	3149	4	20255	101107931
GO:0002683	negative regulation of immune system process	biological_process	0.50914	1	2	3149	10	20255	1.01108e+17
GO:0002698	negative regulation of immune effector process	biological_process	0.50914	1	2	3149	10	20255	1.01108e+17
GO:0002832	negative regulation of response to biotic stimulus	biological_process	0.50914	1	2	3149	10	20255	1.01119e+17
GO:0030683	evasion or tolerance by virus of host immune response	biological_process	0.50914	1	2	3149	10	20255	1.01119e+17
GO:0031348	negative regulation of defense response	biological_process	0.50914	1	2	3149	10	20255	1.01119e+17
GO:0043901	negative regulation of multi-organism process	biological_process	0.50914	1	2	3149	10	20255	1.01108e+17
GO:0050687	negative regulation of defense response to virus	biological_process	0.50914	1	2	3149	10	20255	1.01119e+17
GO:0008108	UDP-glucose:hexose-1-phosphate uridylyltransferase activity	molecular_function	0.50929	1	1	3149	4	20255	101104761
GO:0000394	RNA splicing, via endonucleolytic cleavage and ligation	biological_process	0.5094	1	3	3149	16	20255	1.01121e+26
GO:0006388	tRNA splicing, via endonucleolytic cleavage and ligation	biological_process	0.5094	1	3	3149	16	20255	1.01123e+26
GO:0005976	polysaccharide metabolic process	biological_process	0.51015	1	9	3149	53	20255	1.01113e+80
GO:0072329	monocarboxylic acid catabolic process	biological_process	0.51026	1	3	3149	16	20255	1.01123e+26
GO:0006336	DNA replication-independent nucleosome assembly	biological_process	0.51099	1	2	3149	10	20255	1.00821e+17
GO:0031055	chromatin remodeling at centromere	biological_process	0.51099	1	2	3149	10	20255	1.00821e+17
GO:0034080	CENP-A containing nucleosome assembly	biological_process	0.51099	1	2	3149	10	20255	1.01105e+17
GO:0034724	DNA replication-independent nucleosome organization	biological_process	0.51099	1	2	3149	10	20255	1.00821e+17
GO:0043486	histone exchange	biological_process	0.51099	1	2	3149	10	20255	1.01105e+17
GO:0061641	CENP-A containing chromatin organization	biological_process	0.51099	1	2	3149	10	20255	1.00821e+17
GO:0006470	protein dephosphorylation	biological_process	0.51122	1	21	3149	125	20255	1.01103e+188
GO:0008137	NADH dehydrogenase (ubiquinone) activity	molecular_function	0.51138	1	8	3149	48	20255	1.01113e+71
GO:0050136	NADH dehydrogenase (quinone) activity	molecular_function	0.51138	1	8	3149	48	20255	1.00416e+71
GO:0000097	sulfur amino acid biosynthetic process	biological_process	0.51217	1	1	3149	4	20255	101116797
GO:0003840	gamma-glutamyltransferase activity	molecular_function	0.51259	1	1	3149	4	20255	101102912
GO:0004583	dolichyl-phosphate-glucose-glycolipid alpha-glucosyltransferase activity	molecular_function	0.51301	1	1	3149	4	20255	101108987
GO:0006488	dolichol-linked oligosaccharide biosynthetic process	biological_process	0.51301	1	1	3149	4	20255	101108987
GO:0005654	nucleoplasm	cellular_component	0.51313	1	47	3149	297	20255	101119587,101122216,101119941,101109192,101107557,101123345,101115684,101118173,101111383,101103077,101117517,101102272,101120739,101113383,101113585,101122097,101114356,101120730,101120760,101118731,101115998,101122655,101108196,101110264,101119679,101110406,101111271,101114396,101112696,101113632,101116536,101105413,101109126,101107523,105607297,101116674,101110185,101105271,101122784,101107664…
GO:0044451	nucleoplasm part	cellular_component	0.51313	1	47	3149	297	20255	101113632,101112696,101109126,101105413,101116536,105607297,101107523,101116674,101105271,101122784,101110185,101113081,101107664,101115315,101105809,101120455,101111883,101110402,101119406,101119587,101109192,101122216,101119941,101118173,101115684,101123345,101107557,101117517,101103077,101111383,101114356,101122097,101113585,101120739,101113383,101102272,101118731,101120760,101120730,101110406…
GO:0016571	histone methylation	biological_process	0.51381	1	3	3149	16	20255	1.0112e+26
GO:0072686	mitotic spindle	cellular_component	0.51394	1	9	3149	54	20255	1.01115e+77
GO:0016762	xyloglucan:xyloglucosyl transferase activity	molecular_function	0.51395	1	1	3149	4	20255	101121112
GO:0048046	apoplast	cellular_component	0.51395	1	1	3149	4	20255	101121112
GO:0090231	regulation of spindle checkpoint	biological_process	0.51481	1	1	3149	5	20255	100101234
GO:0090266	regulation of mitotic cell cycle spindle assembly checkpoint	biological_process	0.51481	1	1	3149	5	20255	100101234
GO:1901976	regulation of cell cycle checkpoint	biological_process	0.51481	1	1	3149	5	20255	100101234
GO:1903504	regulation of mitotic spindle checkpoint	biological_process	0.51481	1	1	3149	5	20255	100101234
GO:0009379	Holliday junction helicase complex	cellular_component	0.51525	1	1	3149	4	20255	101115254
GO:0048476	Holliday junction resolvase complex	cellular_component	0.51525	1	1	3149	4	20255	101115254
GO:0051016	barbed-end actin filament capping	biological_process	0.5158	1	2	3149	11	20255	1.01107e+17
GO:0003954	NADH dehydrogenase activity	molecular_function	0.51632	1	9	3149	54	20255	1.0112e+80
GO:0015018	galactosylgalactosylxylosylprotein 3-beta-glucuronosyltransferase activity	molecular_function	0.51633	1	1	3149	4	20255	101116508
GO:0015020	glucuronosyltransferase activity	molecular_function	0.51633	1	1	3149	4	20255	101116508
GO:0051129	negative regulation of cellular component organization	biological_process	0.51712	1	10	3149	61	20255	1.01106e+89
GO:0018342	protein prenylation	biological_process	0.51735	1	2	3149	11	20255	1.01114e+17
GO:0097354	prenylation	biological_process	0.51735	1	2	3149	11	20255	1.01114e+17
GO:0006633	fatty acid biosynthetic process	biological_process	0.51792	1	7	3149	42	20255	1.01113e+62
GO:0008238	exopeptidase activity	molecular_function	0.5181	1	22	3149	130	20255	1.05603e+191
GO:0030682	evasion or tolerance of host defense response	biological_process	0.51837	1	3	3149	16	20255	1.01115e+26
GO:0051807	evasion or tolerance of defense response of other organism involved in symbiotic interaction	biological_process	0.51837	1	3	3149	16	20255	1.01108e+26
GO:0051341	regulation of oxidoreductase activity	biological_process	0.51846	1	1	3149	4	20255	101119126
GO:0051354	negative regulation of oxidoreductase activity	biological_process	0.51846	1	1	3149	4	20255	101119126
GO:1900757	regulation of D-amino-acid oxidase activity	biological_process	0.51846	1	1	3149	4	20255	101119126
GO:1900758	negative regulation of D-amino-acid oxidase activity	biological_process	0.51846	1	1	3149	4	20255	101119126
GO:0004359	glutaminase activity	molecular_function	0.51914	1	1	3149	4	20255	101107269
GO:0008146	sulfotransferase activity	molecular_function	0.51926	1	11	3149	65	20255	1.01111e+98
GO:0022411	cellular component disassembly	biological_process	0.51934	1	8	3149	49	20255	1.01106e+71
GO:0016842	amidine-lyase activity	molecular_function	0.5197	1	1	3149	4	20255	100307044
GO:0015627	type II protein secretion system complex	cellular_component	0.51975	1	1	3149	4	20255	101105154
GO:0015628	protein secretion by the type II secretion system	biological_process	0.51975	1	1	3149	4	20255	101105154
GO:0098776	protein transport across the cell outer membrane	biological_process	0.51975	1	1	3149	4	20255	101105154
GO:0006384	transcription initiation from RNA polymerase III promoter	biological_process	0.5205	1	1	3149	4	20255	101116073
GO:0016796	exonuclease activity, active with either ribo- or deoxyribonucleic acids and producing 5'-phosphomonoesters	molecular_function	0.52109	1	21	3149	128	20255	1.01117e+188
GO:0015321	sodium-dependent phosphate transmembrane transporter activity	molecular_function	0.5211	1	1	3149	4	20255	101106170
GO:0044341	sodium-dependent phosphate transport	biological_process	0.5211	1	1	3149	4	20255	101106170
GO:0005938	cell cortex	cellular_component	0.52113	1	16	3149	95	20255	1.01112e+143
GO:0043234	protein complex	cellular_component	0.52146	1	328	3149	2067	20255	101119310,101103419,101123345,101115047,101109720,101108262,101117261,101118823,101114037,101104699,101102829,101114396,101110882,101119679,101109557,101118296,101118172,101108196,101116195,105604734,101109127,101113585,100135692,101113383,101103725,101116340,101116408,101109126,101122960,101106580,100135691,101106721,101109367,101104978,105614591,101123177,101109602,100526785,101113105,101107664…
GO:0006383	transcription from RNA polymerase III promoter	biological_process	0.52169	1	6	3149	35	20255	1.01105e+53
GO:0007010	cytoskeleton organization	biological_process	0.52269	1	69	3149	426	20255	101112429,101119023,101118239,101123647,101117729,101103234,101106633,101119235,101108494,101121634,101122937,101109088,101114707,101105836,101113115,101103676,101118887,105607633,101116562,106991683,101102997,101116087,101104187,101115341,106991066,101104153,101115149,101122671,101112456,101121484,101106839,101120936,101115993,101120768,101117024,101110882,101118044,101119148,101108554,101107783…
GO:0000334	3-hydroxyanthranilate 3,4-dioxygenase activity	molecular_function	0.52288	1	1	3149	4	20255	101115197
GO:0008376	acetylgalactosaminyltransferase activity	molecular_function	0.52293	1	2	3149	10	20255	1.01115e+17
GO:0031985	Golgi cisterna	cellular_component	0.52293	1	2	3149	10	20255	1.01115e+17
GO:0032580	Golgi cisterna membrane	cellular_component	0.52293	1	2	3149	10	20255	1.01114e+17
GO:0004834	tryptophan synthase activity	molecular_function	0.52336	1	1	3149	4	20255	101102664
GO:0072527	pyrimidine-containing compound metabolic process	biological_process	0.52371	1	12	3149	75	20255	1.01102e+107
GO:0010948	negative regulation of cell cycle process	biological_process	0.52446	1	6	3149	36	20255	1.01103e+53
GO:0007172	signal complex assembly	biological_process	0.52447	1	2	3149	10	20255	101103527443005
GO:1902582	single-organism intracellular transport	biological_process	0.52474	1	75	3149	466	20255	101107561,101114715,101112901,100526782,101111605,101118731,101119023,101105069,101111271,101109308,101115327,101112448,101108814,101115921,101116107,101116568,101111791,101118606,101112696,101120572,101113461,100141296,101123476,101115931,101115150,100302307,101113782,101107427,101120100,101105877,101104605,100526780,101106442,101107621,101105836,101112716,101105809,101109499,101110490,443415,10…
GO:0000272	polysaccharide catabolic process	biological_process	0.52493	1	3	3149	17	20255	1.01109e+26
GO:0051782	negative regulation of cell division	biological_process	0.5254	1	6	3149	36	20255	1.01112e+53
GO:0004809	tRNA (guanine-N2-)-methyltransferase activity	molecular_function	0.52587	1	1	3149	4	20255	101121680
GO:0009214	cyclic nucleotide catabolic process	biological_process	0.52603	1	1	3149	4	20255	101120879
GO:0042398	cellular modified amino acid biosynthetic process	biological_process	0.52604	1	8	3149	47	20255	1.01123e+68
GO:0016573	histone acetylation	biological_process	0.52668	1	2	3149	10	20255	1.01116e+17
GO:0008138	protein tyrosine/serine/threonine phosphatase activity	molecular_function	0.52693	1	15	3149	89	20255	1.01118e+134
GO:0006575	cellular modified amino acid metabolic process	biological_process	0.5295	1	11	3149	65	20255	1.01104e+95
GO:0051051	negative regulation of transport	biological_process	0.52971	1	3	3149	16	20255	1.01112e+26
GO:0007622	rhythmic behavior	biological_process	0.52977	1	1	3149	4	20255	101108239
GO:0016499	orexin receptor activity	molecular_function	0.52977	1	1	3149	4	20255	101108239
GO:0022410	circadian sleep/wake cycle process	biological_process	0.52977	1	1	3149	4	20255	101108239
GO:0042745	circadian sleep/wake cycle	biological_process	0.52977	1	1	3149	4	20255	101108239
GO:0048512	circadian behavior	biological_process	0.52977	1	1	3149	4	20255	101108239
GO:0043436	oxoacid metabolic process	biological_process	0.52983	1	78	3149	480	20255	101114318,101114524,101117514,101123238,101114222,101105624,101120491,101116173,101108782,101111834,101112411,101123619,101112818,101112413,106992004,101121554,101122299,101108052,105610921,101108814,101111645,101102295,443085,101118708,101115341,105609660,101102849,101108201,105616433,101102207,101106474,101102664,101121516,443369,101109735,101106373,443164,101121015,101107719,105602278,10050540…
GO:0016817	hydrolase activity, acting on acid anhydrides	molecular_function	0.52987	1	177	3149	1094	20255	101112429,101106728,101108719,101106367,101119686,101119807,101105763,101121554,101112199,101103677,101121088,101103562,101120297,101115027,101107561,101119457,101121046,105606135,101110526,100101228,101112932,100145880,101116166,100526780,101122604,101102185,100135439,101102997,101116568,101114421,101114265,101121516,101109874,101116097,101105623,101116998,101123382,101115931,101112608,101108370…
GO:0030021	extracellular matrix structural constituent conferring compression resistance	molecular_function	0.53053	1	1	3149	4	20255	101121095
GO:0030345	structural constituent of tooth enamel	molecular_function	0.53053	1	1	3149	4	20255	101121095
GO:0004852	uroporphyrinogen-III synthase activity	molecular_function	0.53054	1	1	3149	4	20255	101122934
GO:0008144	drug binding	molecular_function	0.53135	1	1	3149	4	20255	101120777
GO:0018193	peptidyl-amino acid modification	biological_process	0.53154	1	14	3149	90	20255	1.0112e+119
GO:0009074	aromatic amino acid family catabolic process	biological_process	0.53154	1	2	3149	10	20255	1.01104e+17
GO:0001504	neurotransmitter uptake	biological_process	0.53199	1	1	3149	4	20255	101109808
GO:0001505	regulation of neurotransmitter levels	biological_process	0.53199	1	1	3149	4	20255	101109808
GO:0004022	alcohol dehydrogenase (NAD) activity	molecular_function	0.53199	1	1	3149	4	20255	101120562
GO:0009538	photosystem I reaction center	cellular_component	0.53199	1	1	3149	4	20255	101122420
GO:0015945	methanol metabolic process	biological_process	0.53199	1	1	3149	4	20255	101120562
GO:0015946	methanol oxidation	biological_process	0.53199	1	1	3149	4	20255	101120562
GO:0016837	carbon-oxygen lyase activity, acting on polysaccharides	molecular_function	0.53199	1	1	3149	4	20255	101109226
GO:0017108	5'-flap endonuclease activity	molecular_function	0.53199	1	1	3149	4	20255	101123086
GO:0033557	Slx1-Slx4 complex	cellular_component	0.53199	1	1	3149	4	20255	101123086
GO:0034308	primary alcohol metabolic process	biological_process	0.53199	1	1	3149	4	20255	101120562
GO:0043752	adenosylcobinamide kinase activity	molecular_function	0.53199	1	1	3149	4	20255	101121164
GO:0048256	flap endonuclease activity	molecular_function	0.53199	1	1	3149	4	20255	101123086
GO:0050805	negative regulation of synaptic transmission	biological_process	0.53199	1	1	3149	4	20255	101109808
GO:0050827	toxin receptor binding	molecular_function	0.53199	1	1	3149	4	20255	101109808
GO:0051580	regulation of neurotransmitter uptake	biological_process	0.53199	1	1	3149	4	20255	101109808
GO:0051581	negative regulation of neurotransmitter uptake	biological_process	0.53199	1	1	3149	4	20255	101109808
GO:0051588	regulation of neurotransmitter transport	biological_process	0.53199	1	1	3149	4	20255	101109808
GO:0051589	negative regulation of neurotransmitter transport	biological_process	0.53199	1	1	3149	4	20255	101109808
GO:0051609	inhibition of neurotransmitter uptake	biological_process	0.53199	1	1	3149	4	20255	101109808
GO:0003951	NAD+ kinase activity	molecular_function	0.53199	1	1	3149	4	20255	101104592
GO:0006741	NADP biosynthetic process	biological_process	0.53199	1	1	3149	4	20255	101104592
GO:0004527	exonuclease activity	molecular_function	0.53291	1	25	3149	153	20255	1.01103e+224
GO:0006772	thiamine metabolic process	biological_process	0.53294	1	2	3149	10	20255	1.01107e+17
GO:0009228	thiamine biosynthetic process	biological_process	0.53294	1	2	3149	10	20255	1.01107e+17
GO:0042723	thiamine-containing compound metabolic process	biological_process	0.53294	1	2	3149	10	20255	1.01107e+17
GO:0042724	thiamine-containing compound biosynthetic process	biological_process	0.53294	1	2	3149	10	20255	1.01107e+17
GO:0004601	peroxidase activity	molecular_function	0.5331	1	4	3149	24	20255	1.01114e+35
GO:0004674	protein serine/threonine kinase activity	molecular_function	0.53396	1	32	3149	196	20255	101104446,101111612,101119341,101109276,101123660,101111351,101112735,101113850,101111530,101108239,101115819,101112270,101117561,101103793,101121302,101113576,443453,101117122,101114993,101105529,101111271,443156,443454,101112429,101118961,101111852,101121208,101115680,101114748,101111281,101121166,101107106
GO:0033588	Elongator holoenzyme complex	cellular_component	0.53404	1	2	3149	10	20255	1.01118e+17
GO:0005249	voltage-gated potassium channel activity	molecular_function	0.53443	1	12	3149	73	20255	1.01119e+107
GO:0050840	extracellular matrix binding	molecular_function	0.53527	1	2	3149	11	20255	1.01118e+17
GO:0008239	dipeptidyl-peptidase activity	molecular_function	0.5354	1	2	3149	11	20255	1.00146e+17
GO:0030126	COPI vesicle coat	cellular_component	0.53685	1	2	3149	10	20255	1.01119e+17
GO:0030137	COPI-coated vesicle	cellular_component	0.53685	1	2	3149	10	20255	1.01116e+17
GO:0030663	COPI-coated vesicle membrane	cellular_component	0.53685	1	2	3149	10	20255	1.01119e+17
GO:0035251	UDP-glucosyltransferase activity	molecular_function	0.5369	1	2	3149	10	20255	1.01113e+17
GO:0008716	D-alanine-D-alanine ligase activity	molecular_function	0.53694	1	2	3149	10	20255	1.01107e+17
GO:0032269	negative regulation of cellular protein metabolic process	biological_process	0.53771	1	11	3149	68	20255	1.01121e+95
GO:0051248	negative regulation of protein metabolic process	biological_process	0.53771	1	11	3149	68	20255	1.01113e+95
GO:0045333	cellular respiration	biological_process	0.53816	1	16	3149	101	20255	1.01109e+143
GO:0002764	immune response-regulating signaling pathway	biological_process	0.54021	1	3	3149	17	20255	1.00305e+26
GO:0033108	mitochondrial respiratory chain complex assembly	biological_process	0.54046	1	3	3149	18	20255	1.05606e+26
GO:1901292	nucleoside phosphate catabolic process	biological_process	0.54086	1	2	3149	11	20255	1.01112e+17
GO:0006302	double-strand break repair	biological_process	0.54124	1	7	3149	43	20255	1.01123e+62
GO:0043934	sporulation	biological_process	0.54146	1	5	3149	29	20255	1.01123e+44
GO:0003747	translation release factor activity	molecular_function	0.54175	1	3	3149	17	20255	1.01104e+26
GO:0008079	translation termination factor activity	molecular_function	0.54175	1	3	3149	17	20255	1.01104e+26
GO:0030042	actin filament depolymerization	biological_process	0.54185	1	3	3149	18	20255	1.01105e+26
GO:0030834	regulation of actin filament depolymerization	biological_process	0.54185	1	3	3149	18	20255	1.01107e+26
GO:0030835	negative regulation of actin filament depolymerization	biological_process	0.54185	1	3	3149	18	20255	1.01107e+26
GO:0030837	negative regulation of actin filament polymerization	biological_process	0.54185	1	3	3149	18	20255	1.01105e+26
GO:0031333	negative regulation of protein complex assembly	biological_process	0.54185	1	3	3149	18	20255	1.01113e+26
GO:0032272	negative regulation of protein polymerization	biological_process	0.54185	1	3	3149	18	20255	1.01113e+26
GO:0051261	protein depolymerization	biological_process	0.54185	1	3	3149	18	20255	1.01113e+26
GO:0051693	actin filament capping	biological_process	0.54185	1	3	3149	18	20255	1.01113e+26
GO:1901879	regulation of protein depolymerization	biological_process	0.54185	1	3	3149	18	20255	1.01113e+26
GO:1901880	negative regulation of protein depolymerization	biological_process	0.54185	1	3	3149	18	20255	1.01105e+26
GO:0000280	nuclear division	biological_process	0.54215	1	24	3149	149	20255	1.05602e+212
GO:0008170	N-methyltransferase activity	molecular_function	0.54268	1	9	3149	54	20255	1.01121e+80
GO:0070070	proton-transporting V-type ATPase complex assembly	biological_process	0.54371	1	2	3149	13	20255	1.01111e+17
GO:0070072	vacuolar proton-transporting V-type ATPase complex assembly	biological_process	0.54371	1	2	3149	13	20255	1.01111e+17
GO:0016278	lysine N-methyltransferase activity	molecular_function	0.54544	1	6	3149	35	20255	1.01112e+53
GO:0016279	protein-lysine N-methyltransferase activity	molecular_function	0.54544	1	6	3149	35	20255	1.01115e+53
GO:0018024	histone-lysine N-methyltransferase activity	molecular_function	0.54544	1	6	3149	35	20255	1.01121e+53
GO:0042054	histone methyltransferase activity	molecular_function	0.54544	1	6	3149	35	20255	1.01121e+53
GO:0016592	mediator complex	cellular_component	0.54573	1	22	3149	136	20255	1.0111e+197
GO:0006810	transport	biological_process	0.54574	1	460	3149	2841	20255	101102225,101119310,101120562,101113830,443301,101123170,101105770,101102677,101118823,100125354,101114037,101114396,101121677,101118296,101116195,105605624,101113585,101120650,101103725,101116512,101120259,101116340,101111313,101117047,101114215,101108487,101114171,101108166,101122960,101113997,101114882,105614591,101104978,101105677,101104796,101109602,443308,101105536,100526785,101115097,10112…
GO:0016272	prefoldin complex	cellular_component	0.54603	1	6	3149	38	20255	1.05607e+53
GO:0022890	inorganic cation transmembrane transporter activity	molecular_function	0.54607	1	127	3149	792	20255	101102337,101118126,101122048,100302551,101115484,101109116,100302077,101122716,101105536,101116194,101113252,101109602,106991156,101104978,101113997,101122960,101108302,101106663,101123388,101102327,101103470,101122370,101112132,101109235,101104799,101108770,101117755,101113585,101102128,101109587,101108370,100305130,101107704,101119004,101104154,780477,101121677,101118063,494435,101109665,10110…
GO:0006189	'de novo' IMP biosynthetic process	biological_process	0.5467	1	1	3149	5	20255	101104433
GO:0034655	nucleobase-containing compound catabolic process	biological_process	0.54767	1	8	3149	48	20255	1.01105e+71
GO:0046933	proton-transporting ATP synthase activity, rotational mechanism	molecular_function	0.54797	1	2	3149	11	20255	1.00305e+17
GO:0031984	organelle subcompartment	cellular_component	0.54811	1	3	3149	17	20255	1.01114e+26
GO:0098791	Golgi subcompartment	cellular_component	0.54811	1	3	3149	17	20255	1.01114e+26
GO:0005672	transcription factor TFIIA complex	cellular_component	0.54848	1	4	3149	23	20255	1.01119e+35
GO:0006520	cellular amino acid metabolic process	biological_process	0.54929	1	49	3149	304	20255	101114460,101123619,101103696,101113775,106992004,100135438,101108052,101119743,101119070,101108691,101108782,101112411,443005,101111834,101105872,101111894,101123345,101105624,101116173,101120491,101114524,101114318,101117514,101107719,101117520,101123073,106990131,101105117,106991756,101107664,101121788,101107679,101108201,101103906,101116797,101102207,105616433,101118372,443369,101119091,10110…
GO:0006817	phosphate ion transport	biological_process	0.54965	1	3	3149	17	20255	1.01112e+26
GO:0006928	movement of cell or subcellular component	biological_process	0.55105	1	41	3149	251	20255	101111271,101121554,101116874,101114931,101112429,101106728,101108770,105602053,101119023,101112476,101108806,101109430,780772,101109076,101106609,101121088,101109602,101105836,101110012,101112247,101113102,101107533,101116205,101112094,101102584,101119381,101108506,101110495,101111755,105612424,101115220,101122564,101113963,101116107,101106209,101111791,101104261,101111010,101103268,101110255,10…
GO:0031300	intrinsic component of organelle membrane	cellular_component	0.55111	1	16	3149	99	20255	1.01117e+143
GO:0031301	integral component of organelle membrane	cellular_component	0.55111	1	16	3149	99	20255	1.01117e+143
GO:0004602	glutathione peroxidase activity	molecular_function	0.55119	1	2	3149	12	20255	1.01104e+17
GO:0005212	structural constituent of eye lens	molecular_function	0.55128	1	1	3149	5	20255	101104335
GO:0009289	pilus	cellular_component	0.55135	1	2	3149	12	20255	1.01115e+17
GO:0000150	recombinase activity	molecular_function	0.55184	1	2	3149	12	20255	1.01122e+17
GO:0004867	serine-type endopeptidase inhibitor activity	molecular_function	0.55378	1	10	3149	61	20255	1.01113e+89
GO:0009378	four-way junction helicase activity	molecular_function	0.5541	1	10	3149	61	20255	1.01105e+89
GO:0052855	ADP-dependent NAD(P)H-hydrate dehydratase activity	molecular_function	0.55552	1	1	3149	5	20255	101119487
GO:0071855	neuropeptide receptor binding	molecular_function	0.55562	1	2	3149	12	20255	1.00146e+17
GO:0035091	phosphatidylinositol binding	molecular_function	0.55655	1	12	3149	73	20255	1.01117e+107
GO:0008484	sulfuric ester hydrolase activity	molecular_function	0.55723	1	5	3149	29	20255	1.01119e+44
GO:0036442	hydrogen-exporting ATPase activity	molecular_function	0.55812	1	3	3149	18	20255	1.0111e+26
GO:0046961	proton-transporting ATPase activity, rotational mechanism	molecular_function	0.55812	1	3	3149	18	20255	1.01109e+26
GO:0004857	enzyme inhibitor activity	molecular_function	0.55831	1	40	3149	253	20255	101113259,101108710,101103077,101108748,101123672,101106877,100145863,101120785,101118104,101114042,101113828,101105904,101108679,443312,100302083,101102865,101111593,101101970,101111530,101116267,101116142,101115287,101111287,101101855,101117532,101113311,105606875,101104518,101107904,101116802,443392,101115175,101104001,780471,101104205,101104772,100217407,101103901,101119341,101105017
GO:0048869	cellular developmental process	biological_process	0.55867	1	41	3149	259	20255	105604798,101104573,101103268,101108297,100885767,101101974,101109126,101118095,101108799,101108536,101116203,101120384,101118372,101103198,101106029,101116359,101112247,101110012,101109063,101123259,101106848,100192423,101112894,101116073,105601924,101108788,101104535,101111324,101108806,101122129,101119023,101104023,101110722,101108865,105611383,101104691,100135438,101119556,101123647,101120050…
GO:0016695	oxidoreductase activity, acting on hydrogen as donor	molecular_function	0.5597	1	1	3149	5	20255	101109464
GO:0005956	protein kinase CK2 complex	cellular_component	0.56151	1	1	3149	5	20255	100216435
GO:0007605	sensory perception of sound	biological_process	0.56163	1	4	3149	26	20255	1.05609e+35
GO:0050954	sensory perception of mechanical stimulus	biological_process	0.56163	1	4	3149	26	20255	1.05609e+35
GO:0050792	regulation of viral process	biological_process	0.56239	1	3	3149	18	20255	1.01115e+26
GO:0030337	DNA polymerase processivity factor activity	molecular_function	0.5636	1	2	3149	11	20255	1.0112e+17
GO:0006576	cellular biogenic amine metabolic process	biological_process	0.56383	1	12	3149	74	20255	1.00302e+107
GO:0044106	cellular amine metabolic process	biological_process	0.56383	1	12	3149	74	20255	1.01104e+107
GO:0004127	cytidylate kinase activity	molecular_function	0.56398	1	3	3149	17	20255	1.01113e+26
GO:0004074	biliverdin reductase activity	molecular_function	0.56426	1	1	3149	5	20255	101103711
GO:0042167	heme catabolic process	biological_process	0.56426	1	1	3149	5	20255	101103711
GO:0051234	establishment of localization	biological_process	0.56546	1	462	3149	2859	20255	106992022,101101870,101117780,101110655,101123290,101121414,100294614,101121711,101117157,100820755,101120920,101123662,101104441,101114641,101120936,101113220,101106521,101104154,101105341,101119834,101103063,101102386,101113164,101108370,101102663,101119004,100302356,101123388,101103190,101116105,101107885,105614928,101110495,101112166,101108715,101112247,101115315,101115050,100302099,106991756…
GO:0002697	regulation of immune effector process	biological_process	0.56549	1	2	3149	11	20255	1.01108e+17
GO:0050688	regulation of defense response to virus	biological_process	0.56549	1	2	3149	11	20255	1.01119e+17
GO:0050690	regulation of defense response to virus by virus	biological_process	0.56549	1	2	3149	11	20255	1.01119e+17
GO:0000145	exocyst	cellular_component	0.56566	1	5	3149	30	20255	1.01106e+44
GO:0008252	nucleotidase activity	molecular_function	0.56597	1	2	3149	11	20255	1.01109e+17
GO:0008253	5'-nucleotidase activity	molecular_function	0.56597	1	2	3149	11	20255	1.05606e+17
GO:0006047	UDP-N-acetylglucosamine metabolic process	biological_process	0.56639	1	1	3149	5	20255	101101953
GO:0044003	modification by symbiont of host morphology or physiology	biological_process	0.5665	1	15	3149	94	20255	1.01105e+131
GO:0006887	exocytosis	biological_process	0.56823	1	9	3149	57	20255	4.43301e+77
GO:0000139	Golgi membrane	cellular_component	0.56876	1	9	3149	54	20255	1.01112e+80
GO:0004045	aminoacyl-tRNA hydrolase activity	molecular_function	0.56927	1	1	3149	5	20255	101110047
GO:0006364	rRNA processing	biological_process	0.5693	1	14	3149	90	20255	1.01122e+122
GO:0016072	rRNA metabolic process	biological_process	0.5693	1	14	3149	90	20255	1.01111e+122
GO:0005086	ARF guanyl-nucleotide exchange factor activity	molecular_function	0.56954	1	3	3149	17	20255	1.01107e+26
GO:0032011	ARF protein signal transduction	biological_process	0.56954	1	3	3149	17	20255	1.01107e+26
GO:0032012	regulation of ARF protein signal transduction	biological_process	0.56954	1	3	3149	17	20255	1.01105e+26
GO:0016782	transferase activity, transferring sulfur-containing groups	molecular_function	0.56975	1	13	3149	81	20255	1.01119e+116
GO:0006915	apoptotic process	biological_process	0.57046	1	28	3149	177	20255	101116389,101105677,101106588,101111239,101110953,101112315,443087,101121971,101119070,101107136,101108051,100505402,443059,101111663,101117012,101113497,101102430,101107161,105614909,101110017,101110043,101118942,101104519,101106914,101114715,101119930,101120685,101112751
GO:0012501	programmed cell death	biological_process	0.57046	1	28	3149	177	20255	101106914,101114715,101112751,101119930,101120685,101113497,101102430,101110043,101118942,101104519,101107161,105614909,101110017,101119070,101121971,101117012,443059,101111663,101107136,101108051,100505402,101111239,101106588,101110953,101116389,101105677,443087,101112315
GO:0006479	protein methylation	biological_process	0.57063	1	6	3149	37	20255	1.0112e+53
GO:0008213	protein alkylation	biological_process	0.57063	1	6	3149	37	20255	1.01104e+53
GO:0006694	steroid biosynthetic process	biological_process	0.57081	1	5	3149	32	20255	1.00191e+44
GO:0019220	regulation of phosphate metabolic process	biological_process	0.57168	1	7	3149	43	20255	1.01108e+62
GO:0051174	regulation of phosphorus metabolic process	biological_process	0.57168	1	7	3149	43	20255	1.01111e+62
GO:0016868	intramolecular transferase activity, phosphotransferases	molecular_function	0.5718	1	2	3149	11	20255	1.01114e+17
GO:0045595	regulation of cell differentiation	biological_process	0.57223	1	2	3149	11	20255	1.00192e+17
GO:0006777	Mo-molybdopterin cofactor biosynthetic process	biological_process	0.57257	1	2	3149	11	20255	1.01107e+17
GO:0019720	Mo-molybdopterin cofactor metabolic process	biological_process	0.57257	1	2	3149	11	20255	1.01107e+17
GO:0031683	G-protein beta/gamma-subunit complex binding	molecular_function	0.57307	1	16	3149	109	20255	1.0111e+143
GO:0005129	granulocyte macrophage colony-stimulating factor receptor binding	molecular_function	0.57418	1	1	3149	5	20255	101104506
GO:0051766	inositol trisphosphate kinase activity	molecular_function	0.57418	1	2	3149	12	20255	1.01115e+17
GO:0005135	interleukin-3 receptor binding	molecular_function	0.57434	1	1	3149	5	20255	101118373
GO:0009147	pyrimidine nucleoside triphosphate metabolic process	biological_process	0.57465	1	3	3149	20	20255	1.01112e+26
GO:0005506	iron ion binding	molecular_function	0.57474	1	33	3149	218	20255	100534653,101111886,101104703,101109214,101120054,101102377,101110951,101118441,105612707,101112696,106992010,101105651,101115197,101114650,101106474,101112384,101122521,101103439,105604882,101105872,101105114,101119538,101106985,105613870,101103679,101105610,101112818,101106927,101107485,767576,100170113,100568289,101106641
GO:0016855	racemase and epimerase activity, acting on amino acids and derivatives	molecular_function	0.57512	1	1	3149	5	20255	101102239
GO:0036361	racemase activity, acting on amino acids and derivatives	molecular_function	0.57512	1	1	3149	5	20255	101102239
GO:0005853	eukaryotic translation elongation factor 1 complex	cellular_component	0.57727	1	1	3149	7	20255	443504
GO:0044038	cell wall macromolecule biosynthetic process	biological_process	0.57739	1	1	3149	5	20255	101104081
GO:0070589	cellular component macromolecule biosynthetic process	biological_process	0.57739	1	1	3149	5	20255	101104081
GO:0030599	pectinesterase activity	molecular_function	0.57836	1	1	3149	5	20255	101107485
GO:0042545	cell wall modification	biological_process	0.57836	1	1	3149	5	20255	101107485
GO:0006570	tyrosine metabolic process	biological_process	0.5784	1	1	3149	5	20255	101123619
GO:0015858	nucleoside transport	biological_process	0.57858	1	1	3149	5	20255	101111449
GO:0034257	nicotinamide riboside transmembrane transporter activity	molecular_function	0.57858	1	1	3149	5	20255	101111449
GO:0034258	nicotinamide riboside transport	biological_process	0.57858	1	1	3149	5	20255	101111449
GO:0000794	condensed nuclear chromosome	cellular_component	0.57864	1	13	3149	82	20255	1.01115e+113
GO:0019900	kinase binding	molecular_function	0.57914	1	8	3149	50	20255	1.01114e+68
GO:0008406	gonad development	biological_process	0.57991	1	1	3149	6	20255	101101879
GO:0045137	development of primary sexual characteristics	biological_process	0.57991	1	1	3149	6	20255	101101879
GO:0048608	reproductive structure development	biological_process	0.57991	1	1	3149	6	20255	101101879
GO:0061458	reproductive system development	biological_process	0.57991	1	1	3149	6	20255	101101879
GO:0002253	activation of immune response	biological_process	0.57992	1	3	3149	18	20255	1.00305e+26
GO:0000976	transcription regulatory region sequence-specific DNA binding	molecular_function	0.58071	1	1	3149	5	20255	101116194
GO:0006814	sodium ion transport	biological_process	0.58153	1	15	3149	93	20255	1.01102e+131
GO:0006473	protein acetylation	biological_process	0.58167	1	2	3149	11	20255	1.01123e+17
GO:0006475	internal protein amino acid acetylation	biological_process	0.58167	1	2	3149	11	20255	1.01123e+17
GO:0018393	internal peptidyl-lysine acetylation	biological_process	0.58167	1	2	3149	11	20255	1.01123e+17
GO:0018394	peptidyl-lysine acetylation	biological_process	0.58167	1	2	3149	11	20255	1.01116e+17
GO:0043543	protein acylation	biological_process	0.58167	1	2	3149	11	20255	1.01116e+17
GO:0008076	voltage-gated potassium channel complex	cellular_component	0.58174	1	1	3149	5	20255	101121535
GO:0034705	potassium channel complex	cellular_component	0.58174	1	1	3149	5	20255	101121535
GO:0006082	organic acid metabolic process	biological_process	0.5827	1	78	3149	487	20255	101123345,101102779,101110196,101111894,101102225,105615152,101103614,101110490,100037684,101111009,100135438,101119743,101114460,101103696,101113775,101105872,443005,101119070,101108691,101119091,101103906,101118372,101116797,101121460,101107269,101102594,101106567,443489,101105117,101117520,101123073,106990131,101121788,101107679,101117198,101107664,106991756,101105624,101120491,101116173,10111…
GO:0043242	negative regulation of protein complex disassembly	biological_process	0.58289	1	3	3149	19	20255	1.01105e+26
GO:0005741	mitochondrial outer membrane	cellular_component	0.58303	1	14	3149	92	20255	1.01104e+125
GO:0031968	organelle outer membrane	cellular_component	0.58303	1	14	3149	92	20255	1.01109e+125
GO:0006750	glutathione biosynthetic process	biological_process	0.58311	1	2	3149	11	20255	1.01123e+17
GO:0019184	nonribosomal peptide biosynthetic process	biological_process	0.58311	1	2	3149	11	20255	1.01115e+17
GO:0000776	kinetochore	cellular_component	0.58371	1	17	3149	108	20255	1.0112e+149
GO:0004842	ubiquitin-protein transferase activity	molecular_function	0.58373	1	38	3149	236	20255	101123250,101112198,101109127,101119023,106990166,101107136,101110632,101120050,101113067,101106588,101118862,101113256,101121218,101117261,101103864,101116532,101106425,101118472,101110301,105607037,101109123,101116793,101123317,101123498,101122598,101111496,101106373,101114121,101106762,101112619,101121215,101112260,101107546,101110558,101107439,101114214,101117200,101103337
GO:0019787	ubiquitin-like protein transferase activity	molecular_function	0.58373	1	38	3149	236	20255	101107136,106990166,101119023,101109127,101123250,101112198,101113256,101118862,101113067,101106588,101120050,101110632,101106425,101116532,101117261,101103864,101121218,101109123,105607037,101110301,101118472,101114121,101106373,101111496,101122598,101123498,101123317,101116793,101110558,101107546,101112619,101121215,101112260,101106762,101107439,101103337,101117200,101114214
GO:0006099	tricarboxylic acid cycle	biological_process	0.58375	1	3	3149	18	20255	1.01114e+26
GO:0006101	citrate metabolic process	biological_process	0.58375	1	3	3149	18	20255	1.01121e+26
GO:0048284	organelle fusion	biological_process	0.585	1	5	3149	32	20255	1.01107e+44
GO:1902494	catalytic complex	cellular_component	0.58525	1	77	3149	495	20255	101120050,101102182,101102015,101110406,101118862,100101234,101122655,101119115,101112198,105604186,101107015,105607037,101103077,101111383,101118173,101115684,101119941,101116532,101102825,101111883,101119406,101115555,101120455,443364,101114717,101122168,101123498,101120424,101110185,101122806,101106373,101112094,101115844,101114121,101105623,101103257,641296,101116536,101113632,101102863,10111…
GO:0051817	modification of morphology or physiology of other organism involved in symbiotic interaction	biological_process	0.58529	1	15	3149	95	20255	1.01109e+131
GO:0004673	protein histidine kinase activity	molecular_function	0.58534	1	6	3149	38	20255	1.01109e+53
GO:0016775	phosphotransferase activity, nitrogenous group as acceptor	molecular_function	0.58534	1	6	3149	38	20255	1.01109e+53
GO:0016814	hydrolase activity, acting on carbon-nitrogen (but not peptide) bonds, in cyclic amidines	molecular_function	0.58536	1	6	3149	37	20255	1.01105e+53
GO:0004332	fructose-bisphosphate aldolase activity	molecular_function	0.5859	1	1	3149	5	20255	443085
GO:0042277	peptide binding	molecular_function	0.58686	1	2	3149	12	20255	1.01107e+17
GO:0016901	oxidoreductase activity, acting on the CH-OH group of donors, quinone or similar compound as acceptor	molecular_function	0.58724	1	2	3149	11	20255	1.01114e+17
GO:0051607	defense response to virus	biological_process	0.58813	1	7	3149	45	20255	1.05602e+62
GO:0019073	viral DNA genome packaging	biological_process	0.58817	1	1	3149	5	20255	101106557
GO:1902590	multi-organism organelle organization	biological_process	0.58817	1	1	3149	5	20255	101106557
GO:0009162	deoxyribonucleoside monophosphate metabolic process	biological_process	0.5888	1	1	3149	5	20255	101111670
GO:0019748	secondary metabolic process	biological_process	0.58887	1	7	3149	44	20255	1.01108e+62
GO:0051784	negative regulation of nuclear division	biological_process	0.58907	1	5	3149	32	20255	1.00101e+44
GO:0016615	malate dehydrogenase activity	molecular_function	0.58908	1	2	3149	11	20255	1.01121e+17
GO:0006534	cysteine metabolic process	biological_process	0.58935	1	1	3149	5	20255	101105872
GO:0032182	ubiquitin-like protein binding	molecular_function	0.58938	1	7	3149	44	20255	1.01121e+62
GO:0046165	alcohol biosynthetic process	biological_process	0.58954	1	1	3149	5	20255	101120130
GO:0007517	muscle organ development	biological_process	0.5897	1	1	3149	6	20255	100188930
GO:0061061	muscle structure development	biological_process	0.5897	1	1	3149	6	20255	100188930
GO:0004478	methionine adenosyltransferase activity	molecular_function	0.58995	1	1	3149	5	20255	101107762
GO:0006556	S-adenosylmethionine biosynthetic process	biological_process	0.58995	1	1	3149	5	20255	101107762
GO:0046500	S-adenosylmethionine metabolic process	biological_process	0.58995	1	1	3149	5	20255	101107762
GO:0004497	monooxygenase activity	molecular_function	0.59007	1	9	3149	55	20255	4.43533e+74
GO:1990542	mitochondrial transmembrane transport	biological_process	0.59034	1	2	3149	12	20255	1.01119e+17
GO:0005694	chromosome	cellular_component	0.5925	1	52	3149	336	20255	101116425,101120440,101122671,101121980,101112590,101107427,101115341,101110365,101114421,101116107,101121988,101104674,101111010,101110276,101106888,101115093,101107117,101108877,101123643,101119327,101119643,101111916,101122784,101111693,101122806,101115558,101109430,101105428,101120711,101121074,101123086,106990985,101119909,101115414,443415,101114532,101121088,101112356,105610024,101119148,10…
GO:0033013	tetrapyrrole metabolic process	biological_process	0.59315	1	17	3149	107	20255	1.01121e+152
GO:0015980	energy derivation by oxidation of organic compounds	biological_process	0.59381	1	17	3149	110	20255	1.01121e+152
GO:0006024	glycosaminoglycan biosynthetic process	biological_process	0.59437	1	3	3149	18	20255	1.01108e+26
GO:0005850	eukaryotic translation initiation factor 2 complex	cellular_component	0.59488	1	1	3149	6	20255	101118957
GO:0005057	receptor signaling protein activity	molecular_function	0.59504	1	7	3149	44	20255	1.01103e+62
GO:1901606	alpha-amino acid catabolic process	biological_process	0.59543	1	3	3149	18	20255	1.01107e+26
GO:0016670	oxidoreductase activity, acting on a sulfur group of donors, oxygen as acceptor	molecular_function	0.59579	1	4	3149	25	20255	1.0112e+35
GO:0031341	regulation of cell killing	biological_process	0.59619	1	1	3149	5	20255	101119070
GO:0016772	transferase activity, transferring phosphorus-containing groups	molecular_function	0.59629	1	267	3149	1657	20255	101122739,101116999,100036759,101116722,101112199,101103094,101117519,101103124,101110575,101115575,101120665,497272,101105428,101122937,101113739,101105398,101104446,780507,101114662,105608969,101114273,101102295,101116536,101112645,101104173,101106773,105609660,101102863,101115478,101104626,101118098,101103793,101104592,101104422,101107933,101112270,101109232,101118961,101108266,101115347,10110…
GO:0072330	monocarboxylic acid biosynthetic process	biological_process	0.59723	1	7	3149	45	20255	1.01122e+62
GO:0009250	glucan biosynthetic process	biological_process	0.59747	1	2	3149	12	20255	1.01113e+17
GO:0098588	bounding membrane of organelle	cellular_component	0.59835	1	69	3149	440	20255	106990803,101118823,101112751,101102890,101109499,101115210,101103725,101114641,101102424,101120760,101120768,101107383,101115800,101118296,101105174,101117024,101114396,101119308,101117328,101120041,101111239,101104838,101108768,101116165,101116340,101113132,101109090,101110857,101122048,101105271,101105838,100302099,101110797,101118786,105614591,101117435,101103533,101118583,101114715,101112476…
GO:0000295	adenine nucleotide transmembrane transporter activity	molecular_function	0.59854	1	1	3149	5	20255	101120259
GO:0005346	purine ribonucleotide transmembrane transporter activity	molecular_function	0.59854	1	1	3149	5	20255	101120259
GO:0005347	ATP transmembrane transporter activity	molecular_function	0.59854	1	1	3149	5	20255	101120259
GO:0005471	ATP:ADP antiporter activity	molecular_function	0.59854	1	1	3149	5	20255	101120259
GO:0015211	purine nucleoside transmembrane transporter activity	molecular_function	0.59854	1	1	3149	5	20255	101120259
GO:0015215	nucleotide transmembrane transporter activity	molecular_function	0.59854	1	1	3149	5	20255	101120259
GO:0015216	purine nucleotide transmembrane transporter activity	molecular_function	0.59854	1	1	3149	5	20255	101120259
GO:0015217	ADP transmembrane transporter activity	molecular_function	0.59854	1	1	3149	5	20255	101120259
GO:0015301	anion:anion antiporter activity	molecular_function	0.59854	1	1	3149	5	20255	101120259
GO:0015605	organophosphate ester transmembrane transporter activity	molecular_function	0.59854	1	1	3149	5	20255	101120259
GO:0001527	microfibril	cellular_component	0.59903	1	1	3149	5	20255	101110395
GO:0043205	fibril	cellular_component	0.59903	1	1	3149	5	20255	101110395
GO:0044420	extracellular matrix component	cellular_component	0.59903	1	1	3149	5	20255	101110395
GO:0008536	Ran GTPase binding	molecular_function	0.60161	1	3	3149	18	20255	1.0111e+26
GO:0030915	Smc5-Smc6 complex	cellular_component	0.60266	1	1	3149	5	20255	101120214
GO:0048878	chemical homeostasis	biological_process	0.60327	1	13	3149	96	20255	1.01117e+116
GO:0003870	5-aminolevulinate synthase activity	molecular_function	0.60491	1	1	3149	5	20255	101115684
GO:0006672	ceramide metabolic process	biological_process	0.60559	1	2	3149	12	20255	1.01117e+17
GO:0030282	bone mineralization	biological_process	0.60602	1	1	3149	5	20255	101102997
GO:0030500	regulation of bone mineralization	biological_process	0.60602	1	1	3149	5	20255	101102997
GO:0046848	hydroxyapatite binding	molecular_function	0.60602	1	1	3149	5	20255	101102997
GO:0016149	translation release factor activity, codon specific	molecular_function	0.60604	1	2	3149	12	20255	1.01106e+17
GO:0006063	uronic acid metabolic process	biological_process	0.60657	1	1	3149	5	20255	101123238
GO:0006064	glucuronate catabolic process	biological_process	0.60657	1	1	3149	5	20255	101123238
GO:0008880	glucuronate isomerase activity	molecular_function	0.60657	1	1	3149	5	20255	101123238
GO:0019585	glucuronate metabolic process	biological_process	0.60657	1	1	3149	5	20255	101123238
GO:0016743	carboxyl- or carbamoyltransferase activity	molecular_function	0.60686	1	1	3149	5	20255	101102207
GO:0030177	positive regulation of Wnt signaling pathway	biological_process	0.60704	1	1	3149	5	20255	101116437
GO:0060070	canonical Wnt signaling pathway	biological_process	0.60704	1	1	3149	5	20255	101116437
GO:0060828	regulation of canonical Wnt signaling pathway	biological_process	0.60704	1	1	3149	5	20255	101116437
GO:0090263	positive regulation of canonical Wnt signaling pathway	biological_process	0.60704	1	1	3149	5	20255	101116437
GO:0009274	peptidoglycan-based cell wall	cellular_component	0.60715	1	1	3149	5	20255	101113511
GO:0009276	Gram-negative-bacterium-type cell wall	cellular_component	0.60715	1	1	3149	5	20255	101113511
GO:0061687	detoxification of inorganic compound	biological_process	0.60768	1	3	3149	18	20255	4.97272e+23
GO:0098754	detoxification	biological_process	0.60768	1	3	3149	18	20255	4.97272e+23
GO:0005581	collagen trimer	cellular_component	0.60788	1	4	3149	24	20255	1.00197e+35
GO:0051704	multi-organism process	biological_process	0.60926	1	220	3149	1383	20255	101116802,101107873,101108877,101102341,101106345,101110219,101103918,101110894,101112597,101117183,101103527,101102084,101111886,101105271,105608895,101107931,106991649,101114594,101113866,101108227,101105923,105614928,101118372,101104674,101107765,101118723,101115382,101104453,100125620,100302356,101118044,101122970,101111239,101114460,101113775,105610024,101112495,101111534,106991247,101113948…
GO:0033365	protein localization to organelle	biological_process	0.60976	1	40	3149	253	20255	101104887,100526782,100294614,101109430,101123290,101107341,443415,106990803,101115580,101107561,101110490,101112901,101109308,101102251,101111271,101105069,101106535,101111605,101110495,100302307,101107427,101121484,101115931,101118606,101111791,101111010,101116568,101113997,100141296,101108814,101116107,101105836,100526785,101107621,101112716,100526780,101120777,101110219,101105877,101108182
GO:0000123	histone acetyltransferase complex	cellular_component	0.60984	1	4	3149	27	20255	1.01108e+35
GO:0031248	protein acetyltransferase complex	cellular_component	0.60984	1	4	3149	27	20255	1.01111e+35
GO:1902493	acetyltransferase complex	cellular_component	0.60984	1	4	3149	27	20255	1.01113e+35
GO:0005578	proteinaceous extracellular matrix	cellular_component	0.61036	1	21	3149	134	20255	1.01105e+188
GO:0001076	transcription factor activity, RNA polymerase II transcription factor binding	molecular_function	0.61042	1	21	3149	134	20255	1.01118e+188
GO:0001104	RNA polymerase II transcription cofactor activity	molecular_function	0.61042	1	21	3149	134	20255	1.01108e+188
GO:0005402	cation:sugar symporter activity	molecular_function	0.6109	1	2	3149	12	20255	1.01117e+17
GO:0005666	DNA-directed RNA polymerase III complex	cellular_component	0.61243	1	2	3149	12	20255	1.01117e+17
GO:0010639	negative regulation of organelle organization	biological_process	0.61259	1	8	3149	53	20255	1.01112e+71
GO:0006895	Golgi to endosome transport	biological_process	0.61282	1	1	3149	5	20255	101119023
GO:0006903	vesicle targeting	biological_process	0.61282	1	1	3149	5	20255	101119023
GO:0007162	negative regulation of cell adhesion	biological_process	0.61282	1	1	3149	5	20255	101119023
GO:0010721	negative regulation of cell development	biological_process	0.61282	1	1	3149	5	20255	101119023
GO:0010769	regulation of cell morphogenesis involved in differentiation	biological_process	0.61282	1	1	3149	5	20255	101119023
GO:0010771	negative regulation of cell morphogenesis involved in differentiation	biological_process	0.61282	1	1	3149	5	20255	101119023
GO:0010810	regulation of cell-substrate adhesion	biological_process	0.61282	1	1	3149	5	20255	101119023
GO:0010812	negative regulation of cell-substrate adhesion	biological_process	0.61282	1	1	3149	5	20255	101119023
GO:0034315	regulation of Arp2/3 complex-mediated actin nucleation	biological_process	0.61282	1	1	3149	5	20255	101119023
GO:0034446	substrate adhesion-dependent cell spreading	biological_process	0.61282	1	1	3149	5	20255	101119023
GO:0035650	AP-1 adaptor complex binding	molecular_function	0.61282	1	1	3149	5	20255	101119023
GO:0045596	negative regulation of cell differentiation	biological_process	0.61282	1	1	3149	5	20255	101119023
GO:0048199	vesicle targeting, to, from or within Golgi	biological_process	0.61282	1	1	3149	5	20255	101119023
GO:0048203	vesicle targeting, trans-Golgi to endosome	biological_process	0.61282	1	1	3149	5	20255	101119023
GO:0051093	negative regulation of developmental process	biological_process	0.61282	1	1	3149	5	20255	101119023
GO:0051125	regulation of actin nucleation	biological_process	0.61282	1	1	3149	5	20255	101119023
GO:0060284	regulation of cell development	biological_process	0.61282	1	1	3149	5	20255	101119023
GO:1900024	regulation of substrate adhesion-dependent cell spreading	biological_process	0.61282	1	1	3149	5	20255	101119023
GO:1900025	negative regulation of substrate adhesion-dependent cell spreading	biological_process	0.61282	1	1	3149	5	20255	101119023
GO:0008241	peptidyl-dipeptidase activity	molecular_function	0.61286	1	1	3149	5	20255	105613829
GO:0001772	immunological synapse	cellular_component	0.61291	1	1	3149	5	20255	101118299
GO:0003883	CTP synthase activity	molecular_function	0.61291	1	1	3149	5	20255	101114859
GO:0004649	poly(ADP-ribose) glycohydrolase activity	molecular_function	0.61291	1	1	3149	5	20255	101116040
GO:0009581	detection of external stimulus	biological_process	0.61291	1	1	3149	5	20255	101122041
GO:0009582	detection of abiotic stimulus	biological_process	0.61291	1	1	3149	5	20255	101122041
GO:0009583	detection of light stimulus	biological_process	0.61291	1	1	3149	5	20255	101122041
GO:0016708	oxidoreductase activity, acting on paired donors, with incorporation or reduction of molecular oxygen, NAD(P)H as one donor, and incorporation of two atoms of oxygen into one donor	molecular_function	0.61291	1	1	3149	5	20255	101120054
GO:0051297	centrosome organization	biological_process	0.61291	1	1	3149	5	20255	101118887
GO:0097197	tetraspanin-enriched microdomain	cellular_component	0.61291	1	1	3149	5	20255	101118299
GO:0004222	metalloendopeptidase activity	molecular_function	0.61297	1	28	3149	177	20255	101108609,101111693,101110970,101103901,101119580,101112445,101107749,101109113,101106305,101111183,101107386,106992004,101103936,101110306,101110364,101114650,101117450,101120574,105606023,101108923,101106565,101119791,101109808,101111737,101123582,101113485,101112591,101105076
GO:0061630	ubiquitin protein ligase activity	molecular_function	0.61308	1	13	3149	84	20255	1.01111e+116
GO:0061659	ubiquitin-like protein ligase activity	molecular_function	0.61308	1	13	3149	84	20255	1.01117e+116
GO:0006793	phosphorus metabolic process	biological_process	0.61383	1	206	3149	1285	20255	101121208,101122401,101101953,101110196,101111462,101102951,101112033,101112170,101110150,100037684,101111281,101117721,101117245,101108429,101115347,101120272,101110900,101121391,101111670,101105786,101117092,101108266,101116218,101109460,101114859,101117561,101107523,101102368,101103081,101118723,101111382,101106860,100171396,101116165,101121302,101113261,101110437,101103190,101121944,101112260…
GO:0010959	regulation of metal ion transport	biological_process	0.61401	1	2	3149	12	20255	1.01121e+17
GO:0043269	regulation of ion transport	biological_process	0.61401	1	2	3149	12	20255	1.01115e+17
GO:0006796	phosphate-containing compound metabolic process	biological_process	0.61416	1	204	3149	1273	20255	101120665,101116550,101122959,101105855,101102364,101111852,105606135,101109789,101105428,497272,101112429,101102024,101114356,101102034,101116999,101122739,101110575,101103124,780519,101113178,101113256,101117519,101103094,101104881,101103793,101104592,101102072,101106773,443453,101102295,101109779,101109232,101112590,101119979,101104446,101111612,101118124,101116181,101120130,101120826,10110339…
GO:0002694	regulation of leukocyte activation	biological_process	0.61488	1	1	3149	6	20255	101116496
GO:0050865	regulation of cell activation	biological_process	0.61488	1	1	3149	6	20255	101116496
GO:0051249	regulation of lymphocyte activation	biological_process	0.61488	1	1	3149	6	20255	101116496
GO:0043462	regulation of ATPase activity	biological_process	0.61491	1	2	3149	13	20255	1.01109e+17
GO:0019899	enzyme binding	molecular_function	0.61541	1	18	3149	115	20255	1.01104e+158
GO:0005138	interleukin-6 receptor binding	molecular_function	0.61554	1	1	3149	6	20255	101114714
GO:0043038	amino acid activation	biological_process	0.61561	1	14	3149	89	20255	1.01109e+125
GO:0043039	tRNA aminoacylation	biological_process	0.61561	1	14	3149	89	20255	1.01114e+125
GO:0044454	nuclear chromosome part	cellular_component	0.61582	1	16	3149	104	20255	1.01111e+140
GO:0034622	cellular macromolecular complex assembly	biological_process	0.61594	1	61	3149	399	20255	101105831,101105836,101113115,101105452,105605656,101109602,101105478,101116359,101122784,101106373,101103527,101121788,101120243,101118517,100302099,105614909,101111863,101104153,101117047,101122564,105606265,101122886,101114953,101111755,101120440,101121484,100820750,101107297,101103799,101111010,101110637,101109471,101119486,101116087,101111925,780519,101105557,101113427,101122962,101107783,10…
[truncated: 1,507 more rows]

## Sheet: miRNA_KEGG
##Databases: KEGG PATHWAY
##Statistical test method: hypergeometric test / Fisher's exact test
##FDR correction method: Benjamini and Hochberg
#Term	Database	ID	Input number	Background number	P-Value	Corrected P-Value	Input	KEGG_ID/KO	Entrez_ID	Hyperlink
Malaria	KEGG PATHWAY	oas05144	19	53	0.0141412	0.99403	443305|101113185|554263|100885767|678682|443206|105606081|101114226|101106199|443127|443064|101102928|641296|494433|101105437|101113636|443396|100147790|101102230	oas:443305|oas:101113185|oas:554263|oas:100885767|oas:678682|oas:443206|oas:101106433|oas:101114226|oas:101106199|oas:443127|oas:443064|oas:101102928|oas:641296|oas:494433|oas:101105437|oas:101113636|oas:443396|oas:100147790|oas:101102230|	443305|101113185|554263|100885767|678682|443206|101106433|101114226|101106199|443127|443064|101102928|641296|494433|101105437|101113636|443396|100147790|101102230|	http://www.genome.jp/kegg-bin/show_pathway?oas05144/oas:443206%09red/oas:443064%09red/oas:101102230%09red/oas:101113185%09red/oas:678682%09red/oas:554263%09red/oas:101106199%09red/oas:100147790%09red/oas:101102928%09red/oas:101106433%09red/oas:100885767%09red/oas:101105437%09red/oas:443127%09red/oas:443396%09red/oas:641296%09red/oas:101114226%09red/oas:101113636%09red/oas:443305%09red/oas:494433%…
Folate biosynthesis	KEGG PATHWAY	oas00790	8	14	0.0151832	0.99403	101106721|101117831|101111439|101109677|101101964|105606042|101109419|101116833	oas:101106721|oas:101117831|oas:101111439|oas:101101962|oas:101101964|oas:101117831|oas:101109419|oas:101116833|	101106721|101117831|101111439|101101962|101101964|101117831|101109419|101116833|	http://www.genome.jp/kegg-bin/show_pathway?oas00790/oas:101101962%09red/oas:101101964%09red/oas:101111439%09red/oas:101117831%09red/oas:101106721%09red/oas:101109419%09red/oas:101116833%09red
Natural killer cell mediated cytotoxicity	KEGG PATHWAY	oas04650	31	105	0.0197176	0.99403	101114005|101111174|101108034|101103190|101113279|101103341|443429|101123008|443546|101112406|101113846|443126|105609264|106991404|100101233|101110137|101116639|101109893|101119239|443436|641296|101122059|443396|101107544|101107354|494433|101108790|101108097|101107851|100192433|101107592	oas:101114005|oas:101111174|oas:101108034|oas:101103190|oas:101113279|oas:101103341|oas:443429|oas:101123008|oas:443546|oas:101112406|oas:101113846|oas:443126|oas:443126|oas:101102001|oas:100101233|oas:101110137|oas:101122059|oas:101109893|oas:101119239|oas:443436|oas:641296|oas:101122059|oas:443396|oas:101107544|oas:101107354|oas:494433|oas:101108790|oas:101108097|oas:101111174|oas:100192433|oas…	101114005|101111174|101108034|101103190|101113279|101103341|443429|101123008|443546|101112406|101113846|443126|443126|101102001|100101233|101110137|101122059|101109893|101119239|443436|641296|101122059|443396|101107544|101107354|494433|101108790|101108097|101111174|100192433|101107592|	http://www.genome.jp/kegg-bin/show_pathway?oas04650/oas:101108034%09red/oas:641296%09red/oas:101112406%09red/oas:443436%09red/oas:101110137%09red/oas:101108097%09red/oas:101119239%09red/oas:101123008%09red/oas:101113846%09red/oas:101109893%09red/oas:101113279%09red/oas:101111174%09red/oas:101102001%09red/oas:101122059%09red/oas:100192433%09red/oas:101103190%09red/oas:101108790%09red/oas:101107544…
Fructose and mannose metabolism	KEGG PATHWAY	oas00051	12	30	0.0253943	0.99403	443164|101107697|101107621|101107841|101103393|443489|100036759|443085|101113479|101114115|101117823|101110626	oas:443164|oas:101107697|oas:101107621|oas:101107841|oas:101103393|oas:443489|oas:100036759|oas:443085|oas:101113479|oas:101114115|oas:101117823|oas:101110626|	443164|101107697|101107621|101107841|101103393|443489|100036759|443085|101113479|101114115|101117823|101110626|	http://www.genome.jp/kegg-bin/show_pathway?oas00051/oas:100036759%09red/oas:101107621%09red/oas:101110626%09red/oas:443489%09red/oas:101114115%09red/oas:101107697%09red/oas:443085%09red/oas:101113479%09red/oas:101117823%09red/oas:101107841%09red/oas:101103393%09red/oas:443164%09red
Fanconi anemia pathway	KEGG PATHWAY	oas03460	17	51	0.0323946	0.99403	101105207|101110882|101111068|101111995|101102646|101114968|101110081|101117282|101121980|101123503|101106603|101109980|101107297|101119858|101123086|101118223|101105811	oas:101105207|oas:101110882|oas:101111068|oas:101111995|oas:101102646|oas:101114968|oas:101110081|oas:101117282|oas:101121980|oas:101123503|oas:101106603|oas:101109980|oas:101107297|oas:101119858|oas:101123086|oas:101118223|oas:101105811|	101105207|101110882|101111068|101111995|101102646|101114968|101110081|101117282|101121980|101123503|101106603|101109980|101107297|101119858|101123086|101118223|101105811|	http://www.genome.jp/kegg-bin/show_pathway?oas03460/oas:101119858%09red/oas:101107297%09red/oas:101109980%09red/oas:101106603%09red/oas:101110882%09red/oas:101123086%09red/oas:101117282%09red/oas:101114968%09red/oas:101123503%09red/oas:101102646%09red/oas:101111995%09red/oas:101110081%09red/oas:101105207%09red/oas:101105811%09red/oas:101121980%09red/oas:101118223%09red/oas:101111068%09red
Rap1 signaling pathway	KEGG PATHWAY	oas04015	53	212	0.0376049	0.99403	101114674|101112926|101114005|101101937|101115414|105606081|101103190|101112448|100302340|105606029|101105624|101104540|101103341|443087|101123572|105602970|101114699|554324|101121944|101112406|101123008|101110575|101113846|443346|101104023|101115792|101121164|101123259|100101233|101107715|494433|105606097|101116105|101104572|101112735|101114443|101118864|101122038|641296|101115047|101107545|1011…	oas:101114674|oas:101112926|oas:101114005|oas:101101937|oas:101115414|oas:101106433|oas:101103190|oas:101112448|oas:100302340|oas:101105735|oas:101105624|oas:101104540|oas:101103341|oas:443087|oas:101123572|oas:101122978|oas:101114699|oas:554324|oas:101121944|oas:101112406|oas:101123008|oas:101110575|oas:101113846|oas:443346|oas:101104023|oas:101115792|oas:101121164|oas:101123259|oas:100101233|oa…	101114674|101112926|101114005|101101937|101115414|101106433|101103190|101112448|100302340|101105735|101105624|101104540|101103341|443087|101123572|101122978|101114699|554324|101121944|101112406|101123008|101110575|101113846|443346|101104023|101115792|101121164|101123259|100101233|101107715|494433|101122978|101116105|101104572|101112735|101114443|101118864|101122038|641296|101115047|101107545|1011…	http://www.genome.jp/kegg-bin/show_pathway?oas04015/oas:101115792%09red/oas:101112735%09red/oas:497272%09red/oas:101110782%09red/oas:101104023%09red/oas:641296%09red/oas:443346%09red/oas:101116105%09red/oas:101112406%09red/oas:101109786%09red/oas:101114443%09red/oas:101121164%09red/oas:101105821%09red/oas:101105735%09red/oas:101123008%09red/oas:100302340%09red/oas:554324%09red/oas:101113846%09red…
cAMP signaling pathway	KEGG PATHWAY	oas04024	53	216	0.0477703	0.99403	101112926|101109786|101101873|106991366|105606016|101108228|101103190|101120651|101105821|101123008|101116562|100101233|101118398|443381|101119637|101103077|101113826|101123572|106991387|101121944|101112406|100500781|101113846|101121046|101107354|101115870|101102915|101108487|101107485|443299|101120826|101113586|101110137|101104552|101115800|101103490|101120665|780444|101107545|101113525|494435|1…	oas:101112926|oas:101109786|oas:101101873|oas:101119290|oas:641303|oas:101108228|oas:101103190|oas:101120651|oas:101105821|oas:101123008|oas:101116562|oas:100101233|oas:101118398|oas:443381|oas:101119637|oas:101103077|oas:101113826|oas:101123572|oas:101109105|oas:101121944|oas:101112406|oas:100500781|oas:101113846|oas:101121046|oas:101107354|oas:101115870|oas:101102915|oas:101108487|oas:101107485…	101112926|101109786|101101873|101119290|641303|101108228|101103190|101120651|101105821|101123008|101116562|100101233|101118398|443381|101119637|101103077|101113826|101123572|101109105|101121944|101112406|100500781|101113846|101121046|101107354|101115870|101102915|101108487|101107485|443299|101120826|101113586|101110137|101104552|101115800|101103490|101120665|780444|101107545|101113525|494435|1011…	http://www.genome.jp/kegg-bin/show_pathway?oas04024/oas:101120665%09red/oas:101110687%09red/oas:101119637%09red/oas:101118398%09red/oas:101109816%09red/oas:101115870%09red/oas:101112406%09red/oas:100500781%09red/oas:101109786%09red/oas:101108487%09red/oas:101110137%09red/oas:101105821%09red/oas:101105735%09red/oas:101103077%09red/oas:101103490%09red/oas:641303%09red/oas:101113846%09red/oas:443137…
ABC transporters	KEGG PATHWAY	oas02010	17	55	0.053007	0.99403	101115580|106991387|106991366|101104887|101119252|105603621|101115097|101107561|101116568|106991125|101106333|101115555|101115303|101115931|101121256|101103525|101112932	oas:101115580|oas:101109105|oas:101119290|oas:101104887|oas:101119252|oas:101104054|oas:101115097|oas:101107561|oas:101116568|oas:101121256|oas:101106333|oas:101115555|oas:101115303|oas:101115931|oas:101112460|oas:101103525|oas:101112932|	101115580|101109105|101119290|101104887|101119252|101104054|101115097|101107561|101116568|101121256|101106333|101115555|101115303|101115931|101112460|101103525|101112932|	http://www.genome.jp/kegg-bin/show_pathway?oas02010/oas:101106333%09red/oas:101119290%09red/oas:101115580%09red/oas:101112460%09red/oas:101115303%09red/oas:101104887%09red/oas:101115555%09red/oas:101103525%09red/oas:101112932%09red/oas:101116568%09red/oas:101115931%09red/oas:101109105%09red/oas:101115097%09red/oas:101119252%09red/oas:101121256%09red/oas:101107561%09red/oas:101104054%09red
GnRH signaling pathway	KEGG PATHWAY	oas04912	24	87	0.0628155	0.99403	101114005|101113317|101103190|105606029|101116562|101123008|101123572|101121944|101113846|101118185|101108864|101120826|101104552|101116105|101112260|101109893|101120665|101115047|101119215|101110687|443453|101113850|101122959|101122401	oas:101114005|oas:101113317|oas:101103190|oas:101105735|oas:101116562|oas:101123008|oas:101123572|oas:101121944|oas:101113846|oas:101118185|oas:101108864|oas:101120826|oas:101104552|oas:101116105|oas:101112260|oas:101109893|oas:101120665|oas:101115047|oas:101119215|oas:101110687|oas:443453|oas:101113850|oas:101122959|oas:101122401|	101114005|101113317|101103190|101105735|101116562|101123008|101123572|101121944|101113846|101118185|101108864|101120826|101104552|101116105|101112260|101109893|101120665|101115047|101119215|101110687|443453|101113850|101122959|101122401|	http://www.genome.jp/kegg-bin/show_pathway?oas04912/oas:101120665%09red/oas:101110687%09red/oas:101112260%09red/oas:101116105%09red/oas:101113317%09red/oas:443453%09red/oas:101105735%09red/oas:101123008%09red/oas:101113846%09red/oas:101109893%09red/oas:101118185%09red/oas:101103190%09red/oas:101123572%09red/oas:101121944%09red/oas:101108864%09red/oas:101116562%09red/oas:101119215%09red/oas:101122…
Gastric acid secretion	KEGG PATHWAY	oas04971	20	72	0.0800059	0.99403	101108864|101123572|101113325|494435|101116166|101113317|101103751|443453|101116105|101121944|101118398|101119004|101113850|105606029|101115663|101103490|443137|101119230|443381|101122401	oas:101108864|oas:101123572|oas:101113325|oas:494435|oas:101116166|oas:101113317|oas:101103751|oas:443453|oas:101116105|oas:101121944|oas:101118398|oas:101119004|oas:101113850|oas:101105735|oas:101115663|oas:101103490|oas:443137|oas:101119230|oas:443381|oas:101122401|	101108864|101123572|101113325|494435|101116166|101113317|101103751|443453|101116105|101121944|101118398|101119004|101113850|101105735|101115663|101103490|443137|101119230|443381|101122401|	http://www.genome.jp/kegg-bin/show_pathway?oas04971/oas:494435%09red/oas:101105735%09red/oas:443453%09red/oas:101103490%09red/oas:101113325%09red/oas:101113850%09red/oas:443137%09red/oas:443381%09red/oas:101118398%09red/oas:101119230%09red/oas:101116105%09red/oas:101122401%09red/oas:101123572%09red/oas:101121944%09red/oas:101113317%09red/oas:101119004%09red/oas:101103751%09red/oas:101108864%09red…
Insulin secretion	KEGG PATHWAY	oas04911	23	86	0.0841815	0.99403	101108047|101107485|105606029|101116562|443381|101121944|105615196|101114135|105615152|101109534|101112696|101113586|101104552|101116105|100302624|101103490|101119215|101103751|443453|101118398|101113850|541609|101122401	oas:101108047|oas:101107485|oas:101105735|oas:101116562|oas:443381|oas:101121944|oas:101112056|oas:101114135|oas:101123291|oas:101109534|oas:101112696|oas:101113586|oas:101104552|oas:101116105|oas:100302624|oas:101103490|oas:101119215|oas:101103751|oas:443453|oas:101118398|oas:101113850|oas:541609|oas:101122401|	101108047|101107485|101105735|101116562|443381|101121944|101112056|101114135|101123291|101109534|101112696|101113586|101104552|101116105|100302624|101103490|101119215|101103751|443453|101118398|101113850|541609|101122401|	http://www.genome.jp/kegg-bin/show_pathway?oas04911/oas:443453%09red/oas:101118398%09red/oas:101112696%09red/oas:101116105%09red/oas:101105735%09red/oas:101123291%09red/oas:101103490%09red/oas:101114135%09red/oas:101107485%09red/oas:443381%09red/oas:101121944%09red/oas:100302624%09red/oas:101116562%09red/oas:101109534%09red/oas:101119215%09red/oas:101122401%09red/oas:101113586%09red/oas:101108047…
Calcium signaling pathway	KEGG PATHWAY	oas04020	44	186	0.0961282	0.99403	101112926|101116428|101111766|101113317|101116424|101122011|101121604|101116562|101103341|101123572|101113104|100169940|106990949|101101873|780519|101121944|101121046|101110367|101102915|101108864|101108047|101107715|101120920|101104552|101116105|101122774|101112591|101105211|443533|443050|101122850|101117004|100127216|101119215|101103533|101104560|443453|101114869|101113850|101110429|101117482|4…	oas:101112926|oas:101116428|oas:101111766|oas:101113317|oas:101116424|oas:101122011|oas:101121604|oas:101116562|oas:101103341|oas:101123572|oas:101113104|oas:100169940|oas:101114623|oas:101101873|oas:780519|oas:101121944|oas:101121046|oas:101110367|oas:101102915|oas:101108864|oas:101108047|oas:101107715|oas:101120920|oas:101104552|oas:101116105|oas:101120920|oas:101112591|oas:101105211|oas:443533…	101112926|101116428|101111766|101113317|101116424|101122011|101121604|101116562|101103341|101123572|101113104|100169940|101114623|101101873|780519|101121944|101121046|101110367|101102915|101108864|101108047|101107715|101120920|101104552|101116105|101120920|101112591|101105211|443533|443050|101122850|101117004|100127216|101119215|101103533|101104560|443453|101114869|101113850|101110429|101117482|4…	http://www.genome.jp/kegg-bin/show_pathway?oas04020/oas:101122401%09red/oas:443533%09red/oas:443453%09red/oas:101103341%09red/oas:101110429%09red/oas:101117004%09red/oas:101116105%09red/oas:101113317%09red/oas:101122011%09red/oas:101107715%09red/oas:100169940%09red/oas:780519%09red/oas:101101873%09red/oas:101104560%09red/oas:101123572%09red/oas:101121944%09red/oas:101108864%09red/oas:101105211%09…
[truncated: 260 more rows]
