# Supplementary material for: Non-Coding Transcriptome Provides Novel Insights into the Escherichia coli F17 Susceptibility of Sheep Lamb
Source: Biology (Basel). 2022 Feb 22;11(3):348. doi: 10.3390/biology11030348 (PMC8945857; doi:10.3390/biology11030348)
Supplement: Supplementary file 1 [file biology-11-00348-s001.zip › Supplementary Table S5.xlsx]

## Sheet: parameter training
Table S5: Parameter training results and detailed results of RF and RX
Random Forest for circRNA															Random Forest for miRNA
										the parameters used for final analysis															the parameters used for final analysis
										Ntree=800000															Ntree=100000
										mtry=2*sqrt(p)															mtry=0.1*p
XGBoost for circRNA															XGBoost for miRNA
col_bytree/eta	0.5	0.6	0.7	0.8	0.9	1			note: unit highlighted in yellow were the parameters used for final analysis							col_bytree/eta	0.5	0.6	0.7	0.8	0.9	1		note: unit highlighted in yellow were the parameters used for final analysis
0.01	0.00055556	0	0	0	0	0										0.01	0.0083333	0.0083333	0.0083333	0	0	0
0.05	0.00055556	0	0	0	0	0										0.05	0.0083333	0.0083333	0.0083333	0	0	0
0.1	0	0	0	0	0	0										0.1	0.0083333	0.0083333	0.0083333	0	0	0
0.2	0	0	0	0	0	0										0.2	0.0083333	0.0083333	0.0083333	0	0	0

## Sheet: RF_circRNA
circ_ID	Gini
novel_circ_0024569	8.28447
novel_circ_0004068	8.21488
novel_circ_0015497	8.10976
novel_circ_0006164	8.07719
novel_circ_0019735	8.07152
novel_circ_0000180	8.07078
novel_circ_0020425	8.06535
novel_circ_0026059	8.0197
novel_circ_0002126	7.98244
novel_circ_0008030	7.97627
novel_circ_0017406	7.95456
novel_circ_0021292	7.93704
novel_circ_0021290	7.92001
novel_circ_0005402	7.89854
novel_circ_0008033	7.89385
novel_circ_0001395	7.8862
novel_circ_0024824	7.88102
novel_circ_0022058	7.86548
novel_circ_0018559	7.86054
novel_circ_0017112	7.85733
novel_circ_0014424	7.84327
novel_circ_0023116	7.84228
novel_circ_0019850	7.84006
novel_circ_0014698	7.83809
novel_circ_0005805	7.82353
novel_circ_0023523	7.8218
novel_circ_0002705	7.81267
novel_circ_0022761	7.81193
novel_circ_0021137	7.80626
novel_circ_0008963	7.80058
novel_circ_0022793	7.79861
novel_circ_0006550	7.79787
novel_circ_0006512	7.79787
novel_circ_0005513	7.7917
novel_circ_0012280	7.7838
novel_circ_0005410	7.77714
novel_circ_0004061	7.77418
novel_circ_0021698	7.77344
novel_circ_0023685	7.76998
novel_circ_0014218	7.76357
novel_circ_0018211	7.75222
novel_circ_0005574	7.75197
novel_circ_0006321	7.7421
novel_circ_0024273	7.74062
novel_circ_0015382	7.73519
novel_circ_0004066	7.72335
novel_circ_0019958	7.72187
novel_circ_0010222	7.72063
novel_circ_0022994	7.71767
novel_circ_0012781	7.69522
novel_circ_0003985	7.69448
novel_circ_0002704	7.69324
novel_circ_0003677	7.68707
novel_circ_0013431	7.68633
novel_circ_0018650	7.67918
novel_circ_0019959	7.6735
novel_circ_0003303	7.66857
novel_circ_0018686	7.66585
novel_circ_0018305	7.66462
novel_circ_0023543	7.64809
novel_circ_0022794	7.64759
novel_circ_0006822	7.63599
novel_circ_0010974	7.63451
novel_circ_0003426	7.63303
novel_circ_0013710	7.6202
novel_circ_0021029	7.61749
novel_circ_0004459	7.61601
novel_circ_0009754	7.61576
novel_circ_0008415	7.61083
novel_circ_0019225	7.61083
novel_circ_0022779	7.6091
novel_circ_0005399	7.6086
novel_circ_0022064	7.60095
novel_circ_0004077	7.58862
novel_circ_0021194	7.58467
novel_circ_0008047	7.58121
novel_circ_0019104	7.57924
novel_circ_0020745	7.57727
novel_circ_0014327	7.57653
novel_circ_0004909	7.57134
novel_circ_0018341	7.56838
novel_circ_0003301	7.55851
novel_circ_0003750	7.55728
novel_circ_0016473	7.55728
novel_circ_0018978	7.55111
novel_circ_0017489	7.5479
novel_circ_0001381	7.54741
novel_circ_0008037	7.54618
novel_circ_0017410	7.54494
novel_circ_0023273	7.54198
novel_circ_0025346	7.53532
novel_circ_0008328	7.52372
novel_circ_0006504	7.52323
novel_circ_0020743	7.52298
novel_circ_0004325	7.52273
novel_circ_0016477	7.52273
novel_circ_0001680	7.51928
novel_circ_0006117	7.51879
novel_circ_0008757	7.51829
novel_circ_0006539	7.51582
novel_circ_0005294	7.5099
novel_circ_0023660	7.50842
novel_circ_0020376	7.49979
novel_circ_0012799	7.49954
novel_circ_0016486	7.48991
novel_circ_0002581	7.48597
novel_circ_0022057	7.47338
novel_circ_0012391	7.47264
novel_circ_0011003	7.47165
novel_circ_0015496	7.47165
novel_circ_0019983	7.47017
novel_circ_0023683	7.46968
novel_circ_0009517	7.46573
novel_circ_0000367	7.46006
novel_circ_0006549	7.45907
novel_circ_0014701	7.4566
novel_circ_0022778	7.45265
novel_circ_0013264	7.44895
novel_circ_0005136	7.44525
novel_circ_0007525	7.44352
novel_circ_0009084	7.44155
novel_circ_0021285	7.43859
novel_circ_0006733	7.42798
novel_circ_0010928	7.41811
novel_circ_0004234	7.4149
novel_circ_0012112	7.41441
novel_circ_0022348	7.41342
novel_circ_0023256	7.41243
novel_circ_0026275	7.40972
novel_circ_0018157	7.40478
novel_circ_0001469	7.40454
novel_circ_0018125	7.40182
novel_circ_0014945	7.39936
novel_circ_0017144	7.39664
novel_circ_0023162	7.39442
novel_circ_0016147	7.38899
novel_circ_0010960	7.38504
novel_circ_0010649	7.38406
novel_circ_0003752	7.37937
novel_circ_0010679	7.37813
novel_circ_0017641	7.37271
novel_circ_0009272	7.34926
novel_circ_0018648	7.34655
novel_circ_0003117	7.34581
novel_circ_0000366	7.34334
novel_circ_0000365	7.33693
novel_circ_0008045	7.33668
novel_circ_0025350	7.33347
novel_circ_0008503	7.33199
novel_circ_0005397	7.33051
novel_circ_0002935	7.32903
novel_circ_0009373	7.3278
novel_circ_0025723	7.32706
novel_circ_0010262	7.3162
novel_circ_0010075	7.31348
novel_circ_0008945	7.31126
novel_circ_0013487	7.30386
novel_circ_0004929	7.2972
novel_circ_0017412	7.29103
novel_circ_0022776	7.2856
novel_circ_0001329	7.28387
novel_circ_0023962	7.27968
novel_circ_0025300	7.27696
novel_circ_0014217	7.27277
novel_circ_0024745	7.2708
novel_circ_0014532	7.26611
novel_circ_0014325	7.24538
novel_circ_0004063	7.24217
novel_circ_0023041	7.23798
novel_circ_0020914	7.23526
novel_circ_0013334	7.22243
novel_circ_0008049	7.22046
novel_circ_0013477	7.21996
novel_circ_0013805	7.21676
novel_circ_0025432	7.20615
novel_circ_0021287	7.20541
novel_circ_0002235	7.19924
novel_circ_0020530	7.1827
novel_circ_0000484	7.18246
novel_circ_0004078	7.16667
novel_circ_0008648	7.16543
novel_circ_0022741	7.16321
novel_circ_0000813	7.1373
novel_circ_0022904	7.13113
novel_circ_0010969	7.12891
novel_circ_0020364	7.12299
novel_circ_0007459	7.1109
novel_circ_0008034	7.10251
novel_circ_0009516	7.0882
novel_circ_0007517	7.0877
novel_circ_0002697	7.07216
novel_circ_0011058	7.06426
novel_circ_0022584	7.06352
novel_circ_0016892	7.0576
novel_circ_0004071	7.05711
novel_circ_0001331	7.03761
novel_circ_0023117	7.03662
novel_circ_0022768	7.03638
novel_circ_0006419	7.01812
novel_circ_0013354	7.01392
novel_circ_0004054	6.99147
novel_circ_0013269	6.87697
novel_circ_0023647	6.86587
novel_circ_0026324	6.74743
novel_circ_0004941	4.49529
novel_circ_0014215	4.33342
novel_circ_0006837	4.28333
novel_circ_0002867	4.26285
novel_circ_0009245	4.26112
novel_circ_0002288	4.1639
novel_circ_0020767	4.15847
novel_circ_0019613	4.14638
novel_circ_0018696	4.10838
novel_circ_0010443	4.10122
novel_circ_0025489	4.08222
novel_circ_0011860	4.06865
novel_circ_0001662	4.06791
novel_circ_0012801	4.06667
novel_circ_0014213	4.04866
novel_circ_0007425	4.04471
novel_circ_0024480	4.03879
novel_circ_0025969	4.02892
novel_circ_0023126	4.01412
novel_circ_0010878	3.99709
novel_circ_0015626	3.99487
novel_circ_0008039	3.98648
novel_circ_0019250	3.98451
novel_circ_0007301	3.9697
novel_circ_0010280	3.96427
novel_circ_0010597	3.95539
novel_circ_0021107	3.94749
novel_circ_0006060	3.94626
novel_circ_0023849	3.93713
novel_circ_0014710	3.9243
novel_circ_0017145	3.91665
novel_circ_0013912	3.89444
novel_circ_0008371	3.88728
novel_circ_0024384	3.87643
novel_circ_0000706	3.87174
novel_circ_0002124	3.84188
novel_circ_0008349	3.82782
novel_circ_0003651	3.8251
novel_circ_0005190	3.81054
novel_circ_0015380	3.80635
novel_circ_0021961	3.80117
novel_circ_0011217	3.79919
novel_circ_0022438	3.79426
novel_circ_0018564	3.78957
novel_circ_0005995	3.78833
novel_circ_0014031	3.78636
novel_circ_0024161	3.7755
novel_circ_0014929	3.77353
novel_circ_0017347	3.7681
novel_circ_0022170	3.76711
novel_circ_0001588	3.76415
novel_circ_0021499	3.76218
novel_circ_0014652	3.75552
novel_circ_0026125	3.75058
novel_circ_0018410	3.74417
novel_circ_0011898	3.74096
novel_circ_0000747	3.72714
novel_circ_0011013	3.72097
novel_circ_0005998	3.69161
novel_circ_0021028	3.68198
novel_circ_0021040	3.60031
novel_circ_0006167	3.58945
novel_circ_0003806	3.5781
novel_circ_0016700	3.46681
novel_circ_0021859	3.37625
novel_circ_0001936	3.05868
novel_circ_0015384	3.03894
novel_circ_0023666	3.01821
novel_circ_0001891	2.9654
novel_circ_0008556	2.95208
novel_circ_0006082	2.90273
novel_circ_0011871	2.8746
novel_circ_0019427	2.87065
novel_circ_0015495	2.8403
novel_circ_0013268	2.8102
novel_circ_0017068	2.80797
novel_circ_0015489	2.80773
novel_circ_0024815	2.80551
novel_circ_0009854	2.79662
novel_circ_0001868	2.78256
novel_circ_0007415	2.77984
novel_circ_0015386	2.76652
novel_circ_0016034	2.76504
novel_circ_0022278	2.75319
novel_circ_0000881	2.74406
novel_circ_0008606	2.74406
novel_circ_0011858	2.74209
novel_circ_0003671	2.74184
novel_circ_0016704	2.7379
novel_circ_0024506	2.72457
novel_circ_0008347	2.71297
novel_circ_0009680	2.70853
novel_circ_0004826	2.70804
novel_circ_0021917	2.70014
novel_circ_0001241	2.69521
novel_circ_0014613	2.68929
novel_circ_0023653	2.68879
novel_circ_0005026	2.68558
novel_circ_0018939	2.68509
novel_circ_0024333	2.67719
novel_circ_0007851	2.67497
novel_circ_0003280	2.67251
novel_circ_0010857	2.67201
novel_circ_0015736	2.66979
novel_circ_0014708	2.66905
novel_circ_0007656	2.66412
novel_circ_0021293	2.66214
novel_circ_0008720	2.65548
novel_circ_0006240	2.65326
novel_circ_0008019	2.65252
novel_circ_0002860	2.64586
novel_circ_0003819	2.64438
novel_circ_0002793	2.64314
novel_circ_0021797	2.64191
novel_circ_0009515	2.64166
novel_circ_0001178	2.64067
novel_circ_0007712	2.63697
novel_circ_0012093	2.63278
novel_circ_0018216	2.62414
novel_circ_0018516	2.62192
novel_circ_0024938	2.61797
novel_circ_0000027	2.61279
novel_circ_0007225	2.61156
novel_circ_0001853	2.60489
novel_circ_0002645	2.60317
novel_circ_0003803	2.60193
novel_circ_0009433	2.59626
novel_circ_0012306	2.59453
novel_circ_0021295	2.59083
novel_circ_0003423	2.58244
novel_circ_0003418	2.57825
novel_circ_0010889	2.57528
novel_circ_0006616	2.5743
novel_circ_0018617	2.5743
novel_circ_0024009	2.5738
novel_circ_0024065	2.57208
novel_circ_0022059	2.55505
novel_circ_0023484	2.55382
novel_circ_0010938	2.55234
novel_circ_0021417	2.54666
novel_circ_0010825	2.54148
novel_circ_0001408	2.53852
novel_circ_0017416	2.53062
novel_circ_0006576	2.52988
novel_circ_0009409	2.52347
novel_circ_0022744	2.521
novel_circ_0016536	2.521
novel_circ_0021795	2.52001
novel_circ_0024841	2.51458
novel_circ_0025334	2.51162
novel_circ_0024850	2.51137
novel_circ_0009375	2.51113
novel_circ_0003299	2.50644
novel_circ_0009527	2.50422
novel_circ_0025721	2.49805
novel_circ_0019708	2.4978
novel_circ_0023369	2.49435
novel_circ_0007361	2.49114
novel_circ_0001955	2.48867
novel_circ_0026113	2.48102
novel_circ_0022447	2.48028
novel_circ_0022571	2.47905
novel_circ_0000812	2.47634
novel_circ_0014825	2.47609
novel_circ_0012309	2.46943
novel_circ_0004487	2.46819
novel_circ_0019046	2.45931
novel_circ_0005084	2.45808
novel_circ_0000220	2.45166
novel_circ_0005006	2.45141
novel_circ_0011725	2.45092
novel_circ_0010947	2.45018
novel_circ_0017577	2.44969
novel_circ_0018556	2.44919
novel_circ_0000285	2.43636
novel_circ_0012312	2.43587
novel_circ_0017531	2.43562
novel_circ_0008829	2.43439
novel_circ_0000349	2.42797
novel_circ_0025341	2.42378
novel_circ_0020371	2.41884
novel_circ_0005637	2.41859
novel_circ_0018332	2.4181
novel_circ_0023807	2.41465
novel_circ_0016913	2.41391
novel_circ_0009429	2.41045
novel_circ_0011014	2.40897
novel_circ_0006173	2.40527
novel_circ_0023138	2.39959
novel_circ_0016209	2.39417
novel_circ_0021535	2.39367
novel_circ_0026155	2.39293
novel_circ_0009331	2.38726
novel_circ_0023194	2.37961
novel_circ_0020101	2.37837
novel_circ_0020771	2.37739
novel_circ_0026192	2.3764
novel_circ_0019956	2.37566
novel_circ_0019663	2.36998
novel_circ_0022832	2.36949
novel_circ_0011232	2.36628
novel_circ_0014826	2.36455
novel_circ_0012401	2.36332
novel_circ_0010726	2.36332
novel_circ_0002648	2.36332
novel_circ_0004334	2.36209
novel_circ_0024912	2.36159
novel_circ_0003892	2.36011
novel_circ_0003038	2.35641
novel_circ_0017556	2.35617
novel_circ_0008086	2.35419
novel_circ_0023387	2.35345
novel_circ_0012108	2.35197
novel_circ_0020452	2.35197
novel_circ_0008983	2.34704
novel_circ_0008431	2.34629
novel_circ_0008089	2.34531
novel_circ_0011477	2.34506
novel_circ_0012648	2.34457
novel_circ_0012425	2.34333
novel_circ_0022155	2.34161
novel_circ_0010225	2.34062
novel_circ_0007105	2.33914
novel_circ_0016482	2.33791
novel_circ_0002031	2.33766
novel_circ_0024614	2.33741
novel_circ_0016391	2.33716
novel_circ_0024245	2.33642
novel_circ_0022039	2.33568
novel_circ_0008781	2.33494
novel_circ_0011937	2.3342
novel_circ_0021868	2.33223
novel_circ_0014935	2.33223
novel_circ_0016706	2.3305
novel_circ_0000031	2.32581
novel_circ_0003951	2.32581
novel_circ_0008395	2.32458
novel_circ_0022811	2.3231
novel_circ_0004744	2.32187
novel_circ_0014347	2.32137
novel_circ_0015313	2.32063
novel_circ_0000174	2.31965
novel_circ_0014547	2.31816
novel_circ_0026168	2.31742
novel_circ_0022302	2.3157
novel_circ_0013968	2.31446
novel_circ_0023857	2.31372
novel_circ_0014355	2.31274
novel_circ_0010386	2.30681
novel_circ_0017980	2.30385
novel_circ_0007756	2.30385
novel_circ_0011704	2.30213
novel_circ_0010452	2.3004
novel_circ_0004371	2.29916
novel_circ_0020516	2.29916
novel_circ_0007053	2.29867
novel_circ_0006128	2.29867
novel_circ_0023907	2.29793
novel_circ_0024073	2.29719
novel_circ_0023563	2.29645
novel_circ_0017997	2.29596
novel_circ_0011838	2.29324
novel_circ_0019659	2.29102
novel_circ_0002905	2.28707
novel_circ_0023843	2.28461
novel_circ_0022838	2.28337
novel_circ_0023579	2.28239
novel_circ_0020871	2.27671
novel_circ_0017212	2.27646
novel_circ_0021122	2.27622
novel_circ_0005477	2.27572
novel_circ_0002356	2.27474
novel_circ_0014264	2.27424
novel_circ_0010161	2.27326
novel_circ_0007929	2.27054
novel_circ_0010448	2.26659
novel_circ_0020385	2.26314
novel_circ_0013829	2.25968
novel_circ_0009650	2.25845
novel_circ_0010287	2.25771
novel_circ_0000126	2.25697
novel_circ_0006896	2.25524
novel_circ_0011593	2.25253
novel_circ_0014500	2.24809
novel_circ_0004416	2.24809
novel_circ_0001695	2.24784
novel_circ_0018005	2.24611
novel_circ_0010955	2.24611
novel_circ_0011569	2.24562
novel_circ_0011088	2.24488
novel_circ_0001549	2.24438
novel_circ_0021431	2.24315
novel_circ_0000596	2.2429
novel_circ_0021032	2.24216
novel_circ_0010487	2.24167
novel_circ_0021283	2.2397
novel_circ_0009955	2.23871
novel_circ_0023266	2.23846
novel_circ_0002937	2.23822
novel_circ_0021420	2.23797
novel_circ_0001463	2.23649
novel_circ_0007896	2.23649
novel_circ_0006406	2.23427
novel_circ_0010274	2.23353
novel_circ_0018372	2.23328
novel_circ_0005240	2.23303
novel_circ_0017799	2.23254
novel_circ_0013056	2.23205
novel_circ_0003799	2.23131
novel_circ_0005886	2.23081
novel_circ_0011417	2.23007
novel_circ_0002367	2.22662
novel_circ_0004196	2.22563
novel_circ_0022770	2.2244
novel_circ_0001893	2.22292
novel_circ_0012274	2.22094
novel_circ_0002257	2.21946
novel_circ_0014621	2.21798
novel_circ_0013804	2.21675
novel_circ_0005395	2.21625
novel_circ_0013466	2.21527
novel_circ_0014948	2.21354
novel_circ_0005320	2.2128
novel_circ_0017989	2.21231
novel_circ_0009504	2.21132
novel_circ_0001901	2.21107
novel_circ_0021132	2.20935
novel_circ_0006897	2.2091
novel_circ_0025483	2.20861
novel_circ_0024934	2.20688
novel_circ_0015295	2.20688
novel_circ_0013338	2.20589
novel_circ_0011973	2.20392
novel_circ_0013344	2.20342
novel_circ_0000709	2.20244
novel_circ_0012496	2.19972
novel_circ_0009959	2.19775
novel_circ_0017782	2.19577
novel_circ_0006557	2.19528
novel_circ_0009510	2.19454
novel_circ_0017751	2.19257
novel_circ_0003445	2.19232
novel_circ_0019845	2.19207
novel_circ_0022964	2.19183
novel_circ_0024382	2.19183
novel_circ_0016253	2.19084
novel_circ_0001291	2.18985
novel_circ_0020708	2.18812
novel_circ_0020662	2.18763
novel_circ_0002453	2.1864
novel_circ_0011826	2.18492
novel_circ_0007139	2.18467
novel_circ_0017678	2.18196
novel_circ_0003557	2.17949
novel_circ_0014216	2.17875
novel_circ_0019607	2.17825
novel_circ_0005810	2.17653
novel_circ_0013088	2.17628
novel_circ_0008864	2.17357
novel_circ_0013251	2.17332
novel_circ_0007298	2.16986
novel_circ_0013414	2.16937
novel_circ_0025828	2.16888
novel_circ_0017581	2.16814
novel_circ_0008727	2.16789
novel_circ_0010628	2.16641
novel_circ_0005082	2.16542
novel_circ_0012961	2.16493
novel_circ_0012100	2.16394
novel_circ_0020283	2.16345
novel_circ_0007617	2.16098
novel_circ_0009543	2.15605
novel_circ_0019290	2.15383
novel_circ_0020937	2.1479
novel_circ_0013956	2.14445
novel_circ_0023677	2.14396
novel_circ_0025794	2.14149
novel_circ_0022291	2.13902
novel_circ_0015942	2.13853
novel_circ_0021922	2.13828
novel_circ_0026362	2.13606
novel_circ_0026151	2.13606
novel_circ_0012443	2.13532
novel_circ_0026234	2.13088
novel_circ_0023448	2.13088
novel_circ_0018154	2.13038
novel_circ_0012441	2.12964
novel_circ_0003722	2.1294
novel_circ_0026169	2.12915
novel_circ_0021455	2.12668
novel_circ_0002167	2.12644
novel_circ_0010971	2.12372
novel_circ_0002046	2.12249
novel_circ_0006610	2.12199
novel_circ_0002414	2.12175
novel_circ_0016471	2.12076
novel_circ_0011585	2.12051
novel_circ_0001377	2.11681
novel_circ_0000489	2.11583
novel_circ_0025711	2.11459
novel_circ_0010629	2.11385
novel_circ_0007510	2.11212
novel_circ_0022523	2.11163
novel_circ_0014212	2.10941
novel_circ_0024243	2.10892
novel_circ_0011788	2.10867
novel_circ_0012330	2.10546
novel_circ_0015248	2.10521
novel_circ_0006447	2.1025
novel_circ_0017390	2.10102
novel_circ_0010171	2.10003
novel_circ_0023626	2.09979
novel_circ_0007414	2.09954
novel_circ_0012953	2.09929
novel_circ_0003560	2.09707
novel_circ_0022576	2.09584
novel_circ_0018137	2.09584
novel_circ_0021465	2.0946
novel_circ_0006168	2.09362
novel_circ_0016840	2.09337
novel_circ_0007606	2.09238
novel_circ_0001410	2.08868
novel_circ_0023417	2.0872
novel_circ_0023716	2.08671
novel_circ_0016518	2.08498
novel_circ_0004568	2.08375
novel_circ_0019762	2.0835
novel_circ_0000673	2.0835
novel_circ_0001497	2.08251
novel_circ_0001952	2.08054
novel_circ_0015501	2.08005
novel_circ_0005035	2.07782
novel_circ_0014874	2.07388
novel_circ_0004800	2.07363
novel_circ_0002176	2.07338
novel_circ_0003895	2.07338
novel_circ_0007782	2.06869
novel_circ_0008148	2.06845
novel_circ_0026278	2.0682
novel_circ_0005969	2.0682
novel_circ_0024893	2.06771
novel_circ_0006953	2.06623
novel_circ_0000331	2.0645
novel_circ_0024098	2.06425
novel_circ_0021184	2.06105
novel_circ_0001289	2.0529
novel_circ_0025658	2.05068
novel_circ_0008134	2.05019
novel_circ_0006208	2.04846
novel_circ_0008342	2.04821
novel_circ_0025126	2.04821
novel_circ_0010179	2.04698
novel_circ_0011642	2.04624
novel_circ_0011107	2.04279
novel_circ_0016732	2.04229
novel_circ_0019736	2.0418
novel_circ_0022577	2.04155
novel_circ_0022784	2.03958
novel_circ_0016027	2.03637
novel_circ_0023659	2.0339
novel_circ_0005878	2.03218
novel_circ_0005612	2.0302
novel_circ_0011963	2.0302
novel_circ_0011072	2.0302
novel_circ_0015450	2.02921
novel_circ_0017260	2.02823
novel_circ_0021106	2.02823
novel_circ_0005906	2.02823
novel_circ_0007090	2.0265
novel_circ_0021527	2.02601
novel_circ_0015247	2.02428
novel_circ_0016462	2.02379
novel_circ_0004253	2.01811
novel_circ_0005602	2.01762
novel_circ_0024288	2.0112
novel_circ_0005613	2.00898
novel_circ_0025970	2.00799
novel_circ_0003067	2.00651
novel_circ_0009168	2.00454
novel_circ_0022825	2.00404
novel_circ_0021229	2.00256
novel_circ_0022880	2.00034
novel_circ_0005198	1.99886
novel_circ_0002142	1.9964
novel_circ_0003678	1.98973
novel_circ_0024647	1.98332
novel_circ_0000998	1.98332
novel_circ_0003370	1.97789
novel_circ_0002027	1.96111
novel_circ_0012402	1.96062
novel_circ_0002799	1.95938
novel_circ_0008801	1.95815
novel_circ_0024573	1.95667
novel_circ_0007344	1.95617
novel_circ_0018872	1.95469
novel_circ_0000869	1.94778
novel_circ_0025840	1.94606
novel_circ_0021232	1.93643
novel_circ_0002357	1.93545
novel_circ_0001308	1.93495
novel_circ_0004427	1.93446
novel_circ_0019209	1.93051
novel_circ_0013851	1.92706
novel_circ_0007252	1.92656
novel_circ_0021584	1.92286
novel_circ_0011218	1.91817
novel_circ_0010570	1.91398
novel_circ_0014812	1.91373
novel_circ_0010715	1.91275
novel_circ_0025215	1.91003
novel_circ_0004275	1.90633
novel_circ_0005608	1.89745
novel_circ_0024202	1.88708
novel_circ_0024335	1.87993
novel_circ_0018977	1.86808
novel_circ_0017828	1.85846
novel_circ_0002397	1.85402
novel_circ_0011234	1.85007
novel_circ_0011259	1.8481
novel_circ_0015453	1.83921
novel_circ_0000518	1.83576
novel_circ_0014639	1.80639
novel_circ_0007305	1.78912
novel_circ_0026292	1.78024
novel_circ_0020344	1.77308
novel_circ_0020519	1.76346
novel_circ_0010142	1.76124
novel_circ_0007660	1.73508
novel_circ_0018847	1.71139
novel_circ_0000792	1.63761
novel_circ_0014553	1.58851
novel_circ_0025157	1.58481
novel_circ_0023533	1.53126
novel_circ_0000681	1.52707
novel_circ_0012757	1.52016
novel_circ_0014878	1.5093
novel_circ_0024842	1.4977
novel_circ_0003872	1.48734
novel_circ_0011595	1.46908
novel_circ_0021453	1.44662
novel_circ_0013651	1.43971
novel_circ_0016688	1.40912
novel_circ_0009289	1.40616
novel_circ_0013322	1.40048
novel_circ_0012395	1.39851
novel_circ_0005249	1.39801
novel_circ_0020986	1.3647
novel_circ_0016457	1.361
novel_circ_0023067	1.31806
novel_circ_0014667	1.30819
novel_circ_0000019	1.30671
novel_circ_0024017	1.28303
novel_circ_0021739	1.27809
novel_circ_0011305	1.27784
novel_circ_0005717	1.25884
novel_circ_0014696	1.24206
novel_circ_0006370	1.23787
novel_circ_0019667	1.23367
novel_circ_0020686	1.23195
novel_circ_0018271	1.22948
novel_circ_0019963	1.20357
novel_circ_0003998	1.19197
novel_circ_0021296	1.16902
novel_circ_0019549	1.16088
novel_circ_0017158	1.14731
novel_circ_0002924	1.14287
novel_circ_0019868	1.14089
novel_circ_0015908	1.1404
novel_circ_0019953	1.13744
novel_circ_0011614	1.12732
novel_circ_0015744	1.11918
novel_circ_0005383	1.11844
novel_circ_0014511	1.11572
novel_circ_0012925	1.11005
novel_circ_0005177	1.1098
novel_circ_0008607	1.10758
novel_circ_0011722	1.10462
novel_circ_0013633	1.09771
novel_circ_0011100	1.09648
novel_circ_0011152	1.09574
novel_circ_0005564	1.09475
novel_circ_0002908	1.09376
novel_circ_0016348	1.09327
novel_circ_0023063	1.09204
novel_circ_0004582	1.09031
novel_circ_0020987	1.08488
novel_circ_0018192	1.08414
novel_circ_0016412	1.07945
novel_circ_0021689	1.07921
novel_circ_0018652	1.07822
novel_circ_0002488	1.07698
novel_circ_0022231	1.076
novel_circ_0018473	1.07205
novel_circ_0017748	1.06292
novel_circ_0025854	1.06243
novel_circ_0005481	1.05996
novel_circ_0005403	1.05946
novel_circ_0017696	1.05922
novel_circ_0018571	1.05872
novel_circ_0000064	1.05404
novel_circ_0022591	1.05404
novel_circ_0010555	1.05182
novel_circ_0024717	1.05033
novel_circ_0019441	1.04984
novel_circ_0022854	1.0491
novel_circ_0010362	1.04762
novel_circ_0016293	1.04441
novel_circ_0007157	1.03898
novel_circ_0021677	1.03898
novel_circ_0006171	1.03874
novel_circ_0005293	1.03676
novel_circ_0011621	1.03652
novel_circ_0010957	1.03528
novel_circ_0014126	1.03331
novel_circ_0011265	1.03306
novel_circ_0017426	1.03158
novel_circ_0007487	1.02985
novel_circ_0007221	1.02985
novel_circ_0007725	1.02887
novel_circ_0024057	1.02517
novel_circ_0025252	1.02369
novel_circ_0013486	1.02122
novel_circ_0008423	1.02023
novel_circ_0001182	1.019
novel_circ_0014161	1.01727
novel_circ_0020434	1.01702
novel_circ_0003291	1.01209
novel_circ_0017890	1.01036
novel_circ_0020934	1.00987
novel_circ_0008582	1.00937
novel_circ_0013235	1.00888
novel_circ_0002263	1.00839
novel_circ_0020929	1.00592
novel_circ_0004635	1.0032
novel_circ_0000479	1.00148
novel_circ_0017916	1.00049
novel_circ_0004105	0.999503
novel_circ_0011153	0.997282
novel_circ_0016443	0.994321
novel_circ_0022510	0.993828
novel_circ_0007021	0.993334
novel_circ_0004729	0.991854
novel_circ_0023975	0.989633
novel_circ_0022504	0.986425
novel_circ_0002894	0.986178
novel_circ_0014450	0.985438
novel_circ_0003463	0.983711
novel_circ_0009007	0.983217
novel_circ_0007565	0.981983
novel_circ_0022027	0.980503
novel_circ_0026279	0.978776
novel_circ_0000871	0.977542
novel_circ_0004788	0.976061
novel_circ_0012235	0.973347
novel_circ_0007237	0.97162
novel_circ_0012500	0.969892
novel_circ_0007347	0.967425
novel_circ_0015135	0.967178
novel_circ_0020161	0.965204
novel_circ_0017731	0.96249
novel_circ_0009521	0.960516
novel_circ_0010916	0.960269
novel_circ_0007651	0.959035
novel_circ_0020763	0.959035
novel_circ_0006058	0.958788
novel_circ_0021327	0.957308
novel_circ_0017772	0.956568
novel_circ_0021190	0.95484
novel_circ_0000181	0.9541
novel_circ_0025616	0.95336
novel_circ_0017975	0.947684
novel_circ_0013296	0.947191
novel_circ_0000444	0.946697
novel_circ_0023143	0.946204
novel_circ_0019651	0.942502
novel_circ_0025615	0.942502
novel_circ_0022439	0.941762
novel_circ_0020526	0.937321
novel_circ_0012480	0.936334
novel_circ_0008989	0.933866
novel_circ_0018398	0.932632
novel_circ_0018960	0.931645
novel_circ_0007584	0.931645
novel_circ_0003374	0.931398
novel_circ_0004576	0.930658
novel_circ_0004255	0.928684
novel_circ_0012406	0.927697
novel_circ_0025848	0.925723
novel_circ_0009287	0.924736
novel_circ_0023576	0.923996
novel_circ_0006243	0.921281
novel_circ_0025207	0.917087
novel_circ_0025186	0.916593
novel_circ_0024844	0.912892
novel_circ_0001842	0.909437
novel_circ_0005657	0.90919
novel_circ_0026446	0.907957
novel_circ_0009845	0.907216
novel_circ_0000195	0.905736
novel_circ_0004852	0.905736
novel_circ_0006335	0.905242
novel_circ_0011624	0.904255
novel_circ_0024952	0.904009
novel_circ_0025305	0.903762
novel_circ_0002758	0.901541
novel_circ_0025826	0.900554
novel_circ_0010925	0.90006
novel_circ_0001123	0.897099
novel_circ_0003637	0.896359
novel_circ_0013411	0.896359
novel_circ_0006420	0.895125
novel_circ_0025657	0.890437
novel_circ_0010941	0.89019
novel_circ_0000011	0.889697
novel_circ_0001691	0.886982
novel_circ_0019631	0.886982
novel_circ_0016277	0.886242
novel_circ_0021375	0.885749
novel_circ_0004851	0.883775
novel_circ_0026309	0.883528
novel_circ_0003175	0.883281
novel_circ_0020682	0.883034
novel_circ_0012050	0.882541
novel_circ_0007247	0.881554
novel_circ_0008236	0.880567
novel_circ_0011315	0.878346
novel_circ_0021428	0.878099
novel_circ_0000159	0.875632
novel_circ_0011506	0.873658
novel_circ_0023074	0.869216
novel_circ_0000964	0.868476
novel_circ_0020571	0.867489
novel_circ_0023468	0.865268
novel_circ_0019270	0.864281
novel_circ_0010282	0.861073
novel_circ_0020052	0.858852
novel_circ_0002571	0.856138
novel_circ_0005737	0.855398
novel_circ_0003295	0.853424
novel_circ_0024611	0.850216
novel_circ_0023270	0.850216
novel_circ_0000949	0.849969
novel_circ_0012440	0.849722
novel_circ_0006160	0.848982
novel_circ_0022470	0.848489
novel_circ_0016100	0.847748
novel_circ_0016478	0.847255
novel_circ_0024378	0.847255
novel_circ_0017482	0.845774
novel_circ_0021101	0.844047
novel_circ_0017361	0.842813
novel_circ_0011974	0.839605
novel_circ_0025686	0.835657
novel_circ_0016822	0.835657
novel_circ_0011161	0.831956
novel_circ_0005309	0.829982
novel_circ_0016895	0.829242
novel_circ_0018625	0.828255
novel_circ_0025445	0.828008
novel_circ_0005000	0.826527
novel_circ_0004638	0.824307
novel_circ_0010964	0.820358
novel_circ_0014157	0.818631
novel_circ_0011738	0.812956
novel_circ_0017547	0.811969
novel_circ_0019949	0.810982
novel_circ_0003805	0.810241
novel_circ_0000535	0.807774
novel_circ_0015345	0.807774
novel_circ_0004913	0.803332
novel_circ_0024570	0.801111
novel_circ_0009175	0.800618
novel_circ_0023489	0.800371
novel_circ_0010459	0.799878
novel_circ_0015853	0.799137
novel_circ_0021492	0.792228
novel_circ_0000772	0.791982
novel_circ_0005831	0.791488
novel_circ_0016983	0.790254
novel_circ_0010609	0.788774
novel_circ_0025111	0.785319
novel_circ_0012802	0.785072
novel_circ_0009444	0.781618
novel_circ_0015757	0.77767
novel_circ_0024337	0.773228
novel_circ_0013863	0.772981
novel_circ_0012079	0.770514
novel_circ_0018187	0.762864
novel_circ_0025461	0.760644
novel_circ_0007292	0.757436
novel_circ_0001281	0.756695
novel_circ_0018477	0.749046
novel_circ_0008165	0.747072
novel_circ_0002074	0.744111
novel_circ_0023427	0.74189
novel_circ_0005115	0.73276
novel_circ_0017462	0.718695
novel_circ_0007287	0.717215
novel_circ_0007489	0.711292
novel_circ_0009736	0.704877
novel_circ_0008646	0.703396
novel_circ_0005830	0.700929
novel_circ_0015471	0.699942
novel_circ_0006294	0.691059
novel_circ_0011525	0.685136
novel_circ_0019908	0.683903
novel_circ_0010987	0.680695
novel_circ_0008890	0.67798
novel_circ_0009777	0.669838
novel_circ_0005582	0.667863
novel_circ_0012633	0.667617
novel_circ_0010387	0.66737
novel_circ_0002148	0.666876
novel_circ_0003200	0.666136
novel_circ_0006983	0.664656
novel_circ_0009026	0.663422
novel_circ_0021291	0.662188
novel_circ_0022073	0.661201
novel_circ_0024209	0.658487
novel_circ_0001991	0.655279
novel_circ_0001810	0.64837
novel_circ_0018554	0.648123
novel_circ_0021362	0.647383
novel_circ_0021480	0.645162
novel_circ_0005751	0.644668
novel_circ_0003686	0.644668
novel_circ_0001512	0.643681
novel_circ_0003420	0.643188
novel_circ_0008414	0.637759
novel_circ_0013252	0.637513
novel_circ_0018641	0.636032
novel_circ_0000965	0.635785
novel_circ_0012807	0.633564
novel_circ_0021138	0.631837
novel_circ_0014665	0.629616
novel_circ_0009518	0.629616
novel_circ_0016248	0.627642
novel_circ_0019870	0.621473
novel_circ_0001220	0.616785
novel_circ_0011890	0.615058
novel_circ_0017020	0.614811
novel_circ_0007789	0.614071
novel_circ_0024780	0.613824
novel_circ_0002612	0.611603
novel_circ_0011824	0.610123
novel_circ_0019584	0.609382
novel_circ_0010261	0.608642
novel_circ_0005588	0.608149
novel_circ_0024839	0.605928
novel_circ_0024324	0.605434
novel_circ_0010830	0.604941
novel_circ_0000611	0.603954
novel_circ_0011880	0.601239
novel_circ_0005940	0.599759
novel_circ_0016301	0.599265
novel_circ_0023140	0.598525
novel_circ_0016516	0.596304
novel_circ_0025243	0.595564
novel_circ_0018572	0.595317
novel_circ_0001654	0.595071
novel_circ_0025764	0.593837
novel_circ_0018078	0.592356
novel_circ_0024405	0.588161
novel_circ_0007997	0.587668
novel_circ_0002840	0.584213
novel_circ_0011798	0.584213
novel_circ_0002896	0.58298
novel_circ_0011122	0.582733
novel_circ_0005880	0.582733
novel_circ_0017793	0.581746
novel_circ_0016389	0.581746
novel_circ_0007743	0.580759
novel_circ_0005114	0.579772
novel_circ_0017966	0.579031
novel_circ_0016820	0.578291
novel_circ_0004628	0.578291
novel_circ_0005004	0.578044
novel_circ_0021236	0.578044
novel_circ_0009829	0.57607
novel_circ_0014351	0.575577
novel_circ_0021390	0.575083
novel_circ_0017402	0.574837
novel_circ_0014306	0.57459
novel_circ_0017257	0.574343
novel_circ_0020358	0.573603
novel_circ_0004197	0.573603
novel_circ_0007686	0.572616
novel_circ_0018920	0.571382
novel_circ_0026238	0.571382
novel_circ_0021328	0.571135
novel_circ_0024616	0.570889
novel_circ_0016931	0.570642
novel_circ_0023124	0.570148
novel_circ_0002779	0.569655
novel_circ_0026045	0.568668
novel_circ_0005423	0.567681
novel_circ_0008031	0.567434
novel_circ_0016823	0.56694
novel_circ_0001358	0.565953
novel_circ_0021341	0.56546
novel_circ_0011098	0.56546
novel_circ_0007022	0.56546
novel_circ_0005926	0.562992
novel_circ_0023891	0.562252
novel_circ_0019754	0.562005
novel_circ_0025689	0.561265
novel_circ_0009982	0.560772
novel_circ_0000046	0.560772
novel_circ_0007136	0.560278
novel_circ_0012308	0.559291
novel_circ_0007430	0.558551
novel_circ_0007457	0.558551
novel_circ_0014361	0.556823
novel_circ_0023171	0.55559
novel_circ_0019339	0.554109
novel_circ_0006569	0.554109
novel_circ_0015356	0.551148
novel_circ_0005729	0.550161
novel_circ_0007102	0.549914
novel_circ_0004664	0.546953
novel_circ_0013766	0.54646
novel_circ_0005211	0.546213
novel_circ_0003554	0.543992
novel_circ_0004829	0.542758
novel_circ_0011563	0.542512
novel_circ_0014998	0.542265
novel_circ_0013472	0.541771
novel_circ_0017398	0.541278
novel_circ_0003668	0.541278
novel_circ_0023122	0.540291
novel_circ_0007188	0.539797
novel_circ_0001184	0.539797
novel_circ_0026310	0.539304
novel_circ_0020228	0.539304
novel_circ_0022542	0.53659
novel_circ_0017726	0.53659
novel_circ_0000354	0.53659
novel_circ_0020046	0.536343
novel_circ_0023446	0.535602
novel_circ_0021735	0.535109
novel_circ_0023983	0.534615
novel_circ_0008820	0.534615
novel_circ_0006631	0.534369
novel_circ_0013128	0.534122
novel_circ_0005946	0.533875
novel_circ_0018964	0.533135
novel_circ_0009564	0.531408
novel_circ_0000057	0.530667
novel_circ_0001032	0.530174
novel_circ_0012167	0.530174
novel_circ_0001951	0.529187
novel_circ_0016218	0.52894
novel_circ_0009788	0.528693
novel_circ_0024789	0.528447
novel_circ_0005068	0.526966
novel_circ_0005011	0.525486
novel_circ_0008910	0.524992
novel_circ_0008613	0.524498
novel_circ_0023641	0.524252
novel_circ_0016609	0.524252
novel_circ_0005150	0.524005
novel_circ_0003298	0.524005
novel_circ_0010672	0.523511
novel_circ_0020284	0.523511
novel_circ_0000619	0.522031
novel_circ_0019519	0.521537
novel_circ_0003736	0.51981
novel_circ_0003106	0.519563
novel_circ_0018967	0.519563
novel_circ_0003186	0.518823
novel_circ_0009877	0.518083
novel_circ_0019107	0.518083
novel_circ_0004168	0.517589
novel_circ_0006500	0.516849
novel_circ_0013748	0.516602
novel_circ_0012275	0.516356
novel_circ_0023113	0.516356
novel_circ_0026197	0.515862
novel_circ_0002784	0.515369
novel_circ_0009082	0.515122
novel_circ_0025082	0.514628
novel_circ_0011758	0.514628
novel_circ_0014815	0.514382
novel_circ_0014991	0.514382
novel_circ_0010172	0.514382
novel_circ_0006755	0.513888
novel_circ_0022382	0.513888
novel_circ_0000191	0.513641
novel_circ_0008830	0.513148
novel_circ_0019009	0.512161
novel_circ_0019203	0.51142
novel_circ_0020366	0.511174
novel_circ_0001511	0.511174
novel_circ_0012017	0.511174
novel_circ_0001813	0.510927
novel_circ_0010631	0.510927
novel_circ_0018404	0.510927
novel_circ_0005707	0.510187
novel_circ_0016437	0.510187
novel_circ_0011301	0.50994
novel_circ_0026346	0.50994
novel_circ_0002719	0.50994
novel_circ_0010427	0.509693
novel_circ_0015781	0.509693
novel_circ_0011474	0.509693
novel_circ_0003241	0.508953
novel_circ_0025679	0.508953
novel_circ_0004871	0.507719
novel_circ_0017593	0.507472
novel_circ_0026254	0.505992
novel_circ_0006956	0.505498
novel_circ_0010025	0.505498
novel_circ_0013835	0.505498
novel_circ_0018940	0.505252
novel_circ_0008229	0.505252
novel_circ_0009306	0.504758
novel_circ_0025333	0.504758
novel_circ_0024696	0.504018
novel_circ_0007186	0.503524
novel_circ_0015841	0.503278
novel_circ_0002193	0.503031
novel_circ_0003131	0.503031
novel_circ_0008505	0.50229
novel_circ_0005508	0.502044
novel_circ_0006917	0.501797
novel_circ_0016999	0.50155
novel_circ_0007033	0.501303
novel_circ_0023247	0.501057
novel_circ_0010846	0.50081
novel_circ_0007991	0.500316
novel_circ_0013223	0.499823
novel_circ_0003638	0.499576
novel_circ_0003909	0.499576
novel_circ_0017514	0.499329
novel_circ_0003118	0.498096
novel_circ_0001493	0.498096
novel_circ_0008333	0.497355
novel_circ_0002616	0.496862
novel_circ_0006553	0.496862
novel_circ_0016692	0.496368
novel_circ_0017554	0.496368
novel_circ_0011865	0.496122
novel_circ_0010336	0.495628
novel_circ_0016294	0.495135
novel_circ_0011906	0.494148
novel_circ_0012118	0.493654
novel_circ_0016708	0.493407
novel_circ_0008222	0.493161
novel_circ_0005328	0.493161
novel_circ_0015050	0.493161
novel_circ_0017002	0.49242
novel_circ_0006095	0.49168
novel_circ_0010694	0.490693
novel_circ_0006839	0.490693
novel_circ_0001309	0.490693
novel_circ_0004482	0.490446
novel_circ_0026094	0.490199
novel_circ_0008972	0.490199
novel_circ_0021079	0.489706
novel_circ_0009252	0.488966
novel_circ_0024417	0.488225
novel_circ_0015811	0.487238
novel_circ_0009529	0.487238
novel_circ_0008357	0.486005
novel_circ_0013253	0.485758
novel_circ_0020969	0.485511
novel_circ_0007681	0.485511
novel_circ_0013410	0.485511
novel_circ_0006842	0.485264
novel_circ_0024556	0.484771
novel_circ_0019966	0.484524
novel_circ_0003124	0.484277
novel_circ_0012620	0.484277
novel_circ_0006468	0.484277
novel_circ_0022393	0.484031
novel_circ_0003266	0.483784
novel_circ_0014307	0.48329
novel_circ_0024115	0.483044
novel_circ_0005813	0.48255
novel_circ_0000020	0.48181
novel_circ_0000985	0.481316
novel_circ_0017624	0.48107
novel_circ_0018695	0.480576
novel_circ_0013081	0.479095
novel_circ_0006378	0.478849
novel_circ_0024539	0.478355
novel_circ_0005986	0.477615
novel_circ_0006657	0.477615
novel_circ_0020965	0.477368
novel_circ_0011231	0.476875
novel_circ_0021632	0.476628
novel_circ_0016711	0.475888
novel_circ_0002051	0.475888
novel_circ_0006656	0.475888
novel_circ_0016985	0.475641
novel_circ_0008579	0.474901
novel_circ_0004817	0.474654
novel_circ_0014056	0.474654
novel_circ_0017609	0.474407
novel_circ_0010122	0.47416
novel_circ_0022908	0.47416
novel_circ_0010766	0.473667
novel_circ_0015407	0.47342
novel_circ_0015958	0.47268
novel_circ_0025890	0.472433
novel_circ_0004228	0.472433
novel_circ_0008437	0.472186
novel_circ_0013011	0.472186
novel_circ_0023497	0.472186
novel_circ_0020795	0.47194
novel_circ_0023670	0.471693
novel_circ_0023987	0.470953
novel_circ_0025704	0.470459
novel_circ_0020291	0.470212
novel_circ_0010934	0.469719
novel_circ_0010763	0.469719
novel_circ_0018396	0.469472
novel_circ_0008055	0.469472
novel_circ_0009346	0.468978
novel_circ_0020979	0.468732
novel_circ_0013686	0.468238
novel_circ_0007451	0.468238
novel_circ_0014592	0.467991
novel_circ_0015297	0.467991
novel_circ_0010886	0.467498
novel_circ_0018627	0.466758
novel_circ_0002186	0.466264
novel_circ_0012869	0.466264
novel_circ_0001713	0.466264
novel_circ_0016148	0.466017
novel_circ_0004984	0.465524
novel_circ_0009768	0.465277
novel_circ_0017564	0.46503
novel_circ_0000945	0.46503
novel_circ_0008275	0.46503
novel_circ_0009137	0.464537
novel_circ_0022216	0.46355
novel_circ_0023156	0.463303
novel_circ_0015832	0.463056
novel_circ_0022133	0.46281
novel_circ_0012898	0.46281
novel_circ_0004390	0.462563
novel_circ_0007285	0.462563
novel_circ_0004666	0.462316
novel_circ_0001720	0.461823
novel_circ_0022985	0.460589
novel_circ_0022239	0.460589
novel_circ_0020319	0.460342
novel_circ_0026445	0.459355
novel_circ_0012165	0.459355
novel_circ_0013500	0.459355
novel_circ_0023260	0.459355
novel_circ_0015637	0.458862
novel_circ_0014345	0.458862
novel_circ_0026365	0.458862
novel_circ_0013475	0.458862
novel_circ_0010922	0.458615
novel_circ_0019211	0.458368
novel_circ_0008469	0.458121
novel_circ_0013592	0.458121
novel_circ_0021164	0.458121
novel_circ_0020166	0.457628
novel_circ_0005271	0.457381
novel_circ_0007677	0.457134
novel_circ_0000766	0.457134
novel_circ_0004085	0.456887
novel_circ_0019574	0.456641
novel_circ_0016272	0.456147
novel_circ_0017871	0.454913
novel_circ_0004618	0.45442
novel_circ_0001918	0.45442
novel_circ_0001990	0.45442
novel_circ_0023855	0.454173
novel_circ_0002999	0.45368
novel_circ_0006090	0.453433
novel_circ_0001494	0.453186
novel_circ_0010845	0.453186
novel_circ_0011830	0.453186
novel_circ_0002505	0.452199
novel_circ_0015018	0.451952
novel_circ_0019007	0.451706
novel_circ_0005188	0.451459
novel_circ_0022521	0.451459
novel_circ_0019190	0.451459
novel_circ_0025132	0.451212
novel_circ_0011863	0.450719
novel_circ_0001035	0.450719
novel_circ_0022736	0.449978
novel_circ_0018896	0.449732
novel_circ_0007544	0.449485
novel_circ_0020695	0.449485
novel_circ_0002468	0.449238
novel_circ_0016585	0.449238
novel_circ_0004991	0.448991
novel_circ_0011936	0.448004
novel_circ_0007623	0.447017
novel_circ_0000708	0.445783
novel_circ_0022691	0.445537
novel_circ_0001379	0.445537
novel_circ_0003630	0.44529
novel_circ_0013238	0.44529
novel_circ_0019103	0.445043
novel_circ_0003075	0.444796
novel_circ_0023733	0.444796
novel_circ_0016094	0.44455
novel_circ_0013222	0.444303
novel_circ_0006803	0.444056
novel_circ_0004887	0.443316
novel_circ_0015921	0.443069
novel_circ_0020346	0.442822
novel_circ_0012526	0.442329
novel_circ_0015709	0.442082
novel_circ_0014666	0.441589
novel_circ_0013553	0.441589
novel_circ_0008010	0.441095
novel_circ_0013157	0.440848
novel_circ_0008928	0.440848
novel_circ_0008761	0.440848
novel_circ_0025356	0.440355
novel_circ_0008679	0.439368
novel_circ_0000921	0.439121
novel_circ_0010200	0.439121
novel_circ_0001396	0.439121
novel_circ_0016912	0.437887
novel_circ_0015123	0.437641
novel_circ_0009297	0.437641
novel_circ_0020910	0.437394
novel_circ_0010100	0.437394
novel_circ_0016451	0.437147
novel_circ_0008497	0.4369
novel_circ_0005799	0.436654
novel_circ_0020848	0.43616
novel_circ_0012622	0.43616
novel_circ_0018683	0.43542
novel_circ_0026114	0.435173
novel_circ_0023027	0.434926
novel_circ_0022762	0.434926
novel_circ_0017174	0.434679
novel_circ_0025004	0.434186
novel_circ_0009715	0.433692
novel_circ_0017787	0.433446
novel_circ_0014480	0.433199
novel_circ_0003179	0.432952
novel_circ_0001059	0.432705
novel_circ_0011823	0.432459
novel_circ_0003188	0.431965
novel_circ_0006546	0.431718
novel_circ_0020919	0.431718
novel_circ_0005083	0.431225
novel_circ_0023110	0.431225
novel_circ_0013948	0.430978
novel_circ_0000200	0.430731
novel_circ_0002642	0.430731
novel_circ_0018594	0.430485
novel_circ_0008807	0.429744
novel_circ_0019316	0.429498
novel_circ_0020365	0.429004
novel_circ_0009724	0.429004
novel_circ_0023453	0.428757
novel_circ_0018288	0.428757
novel_circ_0023774	0.428264
novel_circ_0003055	0.428264
novel_circ_0005651	0.427277
novel_circ_0009559	0.426783
novel_circ_0007668	0.42629
novel_circ_0005121	0.426043
novel_circ_0005575	0.426043
novel_circ_0025045	0.425796
novel_circ_0023232	0.42555
novel_circ_0002064	0.42555
novel_circ_0023956	0.425303
novel_circ_0025260	0.425056
novel_circ_0003381	0.425056
novel_circ_0001222	0.424562
novel_circ_0010371	0.424562
novel_circ_0010758	0.424562
novel_circ_0025766	0.424562
novel_circ_0003178	0.423822
novel_circ_0013656	0.423575
novel_circ_0022595	0.423575
novel_circ_0021223	0.423329
novel_circ_0025928	0.423329
novel_circ_0008852	0.423329
novel_circ_0001110	0.422588
novel_circ_0020664	0.422095
novel_circ_0004401	0.421601
novel_circ_0014577	0.421601
novel_circ_0007076	0.421355
novel_circ_0000239	0.421108
novel_circ_0017823	0.420861
novel_circ_0023546	0.420614
novel_circ_0000984	0.420614
novel_circ_0008272	0.420121
novel_circ_0023655	0.420121
novel_circ_0005864	0.420121
novel_circ_0004462	0.419874
novel_circ_0003181	0.418887
novel_circ_0017352	0.418394
novel_circ_0001965	0.417653
novel_circ_0023941	0.416913
novel_circ_0021228	0.416666
novel_circ_0024224	0.416666
novel_circ_0005056	0.416666
novel_circ_0000051	0.416173
novel_circ_0019622	0.416173
novel_circ_0008530	0.415679
novel_circ_0020869	0.415679
novel_circ_0014160	0.415679
novel_circ_0020322	0.415433
novel_circ_0006783	0.414939
novel_circ_0006535	0.414692
novel_circ_0018210	0.414199
novel_circ_0021840	0.414199
novel_circ_0010559	0.413705
novel_circ_0021644	0.413705
novel_circ_0016889	0.412965
novel_circ_0003064	0.412225
novel_circ_0024771	0.412225
novel_circ_0003359	0.412225
novel_circ_0015398	0.411731
novel_circ_0015592	0.411238
novel_circ_0010943	0.410991
novel_circ_0017234	0.410991
novel_circ_0020397	0.410497
novel_circ_0020974	0.410497
novel_circ_0004006	0.410251
novel_circ_0022552	0.410251
novel_circ_0022093	0.409264
novel_circ_0020021	0.409264
novel_circ_0009998	0.409017
novel_circ_0002165	0.409017
novel_circ_0003864	0.40877
novel_circ_0001122	0.40877
novel_circ_0020336	0.408523
novel_circ_0013365	0.408277
novel_circ_0009759	0.408277
novel_circ_0021524	0.40803
novel_circ_0023422	0.407783
novel_circ_0016903	0.40729
novel_circ_0011172	0.407043
novel_circ_0012577	0.407043
novel_circ_0020257	0.406056
novel_circ_0012041	0.405809
novel_circ_0013946	0.405809
novel_circ_0012077	0.405562
novel_circ_0008933	0.405316
novel_circ_0000075	0.405316
novel_circ_0011801	0.404822
novel_circ_0010199	0.404575
novel_circ_0010933	0.404575
novel_circ_0023479	0.404329
novel_circ_0022187	0.404329
novel_circ_0019945	0.404329
novel_circ_0022677	0.403835
novel_circ_0003149	0.403835
novel_circ_0020945	0.403835
novel_circ_0007703	0.403588
novel_circ_0010891	0.403588
novel_circ_0011622	0.403095
novel_circ_0013408	0.403095
novel_circ_0022457	0.403095
novel_circ_0004073	0.402848
novel_circ_0015635	0.402354
novel_circ_0008169	0.402108
novel_circ_0002835	0.401861
novel_circ_0016076	0.401614
novel_circ_0003127	0.400874
novel_circ_0004810	0.40038
novel_circ_0012795	0.400134
novel_circ_0025758	0.39964
novel_circ_0023411	0.399393
novel_circ_0016282	0.399147
novel_circ_0020579	0.398406
novel_circ_0015774	0.39816
novel_circ_0023840	0.39816
novel_circ_0000269	0.397913
novel_circ_0005418	0.397666
novel_circ_0005130	0.397419
novel_circ_0026076	0.397173
novel_circ_0023663	0.396926
novel_circ_0003853	0.396679
novel_circ_0016105	0.396679
novel_circ_0021716	0.396679
novel_circ_0009963	0.395939
novel_circ_0003798	0.395939
novel_circ_0003552	0.395939
novel_circ_0012334	0.395939
novel_circ_0011258	0.395445
novel_circ_0021522	0.395445
novel_circ_0021218	0.395199
novel_circ_0008550	0.395199
novel_circ_0017986	0.395199
novel_circ_0010902	0.394952
novel_circ_0024895	0.394705
novel_circ_0009378	0.394212
novel_circ_0016988	0.393471
novel_circ_0003192	0.393471
novel_circ_0007684	0.392978
novel_circ_0024478	0.392978
novel_circ_0006007	0.392731
novel_circ_0013556	0.392484
novel_circ_0024395	0.392238
novel_circ_0009089	0.391991
novel_circ_0011368	0.391991
novel_circ_0008674	0.391744
novel_circ_0024151	0.391744
novel_circ_0004647	0.391744
novel_circ_0004258	0.391004
novel_circ_0001250	0.390757
novel_circ_0019406	0.39051
novel_circ_0021615	0.390263
novel_circ_0019132	0.389276
novel_circ_0009836	0.38903
novel_circ_0020892	0.38903
novel_circ_0002622	0.388536
novel_circ_0016121	0.388289
novel_circ_0009556	0.387796
novel_circ_0020290	0.387549
novel_circ_0009988	0.387549
novel_circ_0015826	0.387302
novel_circ_0000649	0.387056
novel_circ_0010950	0.386315
novel_circ_0006925	0.386069
novel_circ_0006074	0.386069
novel_circ_0011800	0.385822
novel_circ_0015336	0.385822
novel_circ_0014214	0.385575
novel_circ_0013655	0.384835
novel_circ_0015457	0.384835
novel_circ_0018801	0.384835
novel_circ_0021964	0.384835
novel_circ_0025112	0.384341
novel_circ_0006314	0.384341
novel_circ_0018927	0.384095
novel_circ_0001341	0.384095
novel_circ_0022275	0.384095
novel_circ_0021445	0.384095
novel_circ_0023923	0.383848
novel_circ_0012766	0.383108
novel_circ_0001812	0.383108
novel_circ_0017128	0.382614
novel_circ_0018108	0.382614
novel_circ_0025956	0.382367
novel_circ_0015126	0.382367
novel_circ_0021772	0.382367
novel_circ_0002321	0.382121
novel_circ_0013936	0.381874
novel_circ_0000050	0.381874
novel_circ_0007124	0.381874
novel_circ_0015962	0.381874
novel_circ_0002756	0.381134
novel_circ_0015679	0.380887
novel_circ_0011194	0.380887
novel_circ_0006731	0.38064
novel_circ_0003572	0.38064
novel_circ_0004189	0.38064
novel_circ_0003681	0.380393
novel_circ_0002956	0.379159
novel_circ_0001420	0.378913
novel_circ_0013834	0.378913
novel_circ_0015725	0.378666
novel_circ_0006121	0.378666
novel_circ_0022401	0.378419
novel_circ_0019635	0.378172
novel_circ_0022948	0.377926
novel_circ_0025358	0.377679
novel_circ_0022971	0.377432
novel_circ_0025563	0.377185
novel_circ_0007159	0.377185
novel_circ_0018874	0.376692
novel_circ_0005122	0.376692
novel_circ_0013696	0.375458
novel_circ_0005718	0.375211
novel_circ_0002589	0.374965
novel_circ_0010858	0.374224
novel_circ_0008107	0.373731
novel_circ_0015153	0.373731
novel_circ_0009964	0.373731
novel_circ_0025578	0.373484
novel_circ_0015188	0.373484
novel_circ_0000845	0.373237
novel_circ_0014814	0.372744
novel_circ_0018861	0.372744
novel_circ_0000967	0.372497
novel_circ_0000222	0.37225
novel_circ_0017582	0.37225
novel_circ_0018212	0.372004
novel_circ_0003238	0.371263
novel_circ_0015435	0.37077
novel_circ_0017397	0.37077
novel_circ_0003914	0.370523
novel_circ_0004898	0.370523
novel_circ_0006207	0.370276
novel_circ_0023565	0.370276
novel_circ_0004489	0.37003
novel_circ_0018476	0.369042
novel_circ_0023472	0.368796
novel_circ_0014486	0.368796
novel_circ_0006285	0.368796
novel_circ_0003223	0.368302
novel_circ_0017140	0.368055
novel_circ_0023898	0.368055
novel_circ_0020220	0.368055
novel_circ_0001386	0.368055
novel_circ_0010569	0.367562
novel_circ_0009824	0.367315
novel_circ_0014629	0.367068
novel_circ_0003834	0.367068
novel_circ_0006758	0.366822
novel_circ_0019588	0.366575
novel_circ_0008927	0.366328
novel_circ_0003360	0.365341
novel_circ_0007467	0.365341
novel_circ_0011680	0.365094
novel_circ_0007968	0.364848
novel_circ_0018634	0.364848
novel_circ_0016461	0.364601
novel_circ_0016936	0.364601
novel_circ_0016791	0.364601
novel_circ_0009503	0.364354
novel_circ_0021426	0.364354
novel_circ_0019799	0.363614
novel_circ_0021690	0.363614
novel_circ_0007374	0.363367
novel_circ_0002025	0.362874
novel_circ_0013053	0.362627
novel_circ_0003597	0.362133
novel_circ_0025637	0.361887
novel_circ_0007533	0.36164
novel_circ_0003533	0.3609
novel_circ_0020347	0.3609
novel_circ_0022033	0.360653
novel_circ_0007389	0.360406
novel_circ_0020834	0.360159
novel_circ_0021479	0.359913
novel_circ_0013722	0.358185
novel_circ_0002282	0.358185
novel_circ_0026082	0.357198
novel_circ_0008051	0.357198
novel_circ_0001823	0.357198
novel_circ_0010384	0.356951
novel_circ_0016255	0.355718
novel_circ_0014576	0.355224
novel_circ_0001406	0.354731
novel_circ_0000768	0.354484
novel_circ_0010583	0.353744
novel_circ_0017672	0.353497
novel_circ_0004222	0.353497
novel_circ_0022240	0.35325
novel_circ_0007126	0.353003
novel_circ_0018082	0.35251
novel_circ_0004304	0.352263
novel_circ_0003409	0.352016
novel_circ_0016472	0.351523
novel_circ_0015877	0.351523
novel_circ_0009341	0.351029
novel_circ_0004544	0.350783
novel_circ_0012485	0.350783
novel_circ_0012965	0.350289
novel_circ_0012524	0.350289
novel_circ_0014374	0.350289
novel_circ_0020940	0.350289
novel_circ_0025081	0.350289
novel_circ_0013915	0.350289
novel_circ_0005080	0.350042
novel_circ_0006190	0.350042
novel_circ_0006111	0.349796
novel_circ_0002676	0.349549
novel_circ_0011475	0.349302
novel_circ_0012709	0.349302
novel_circ_0026217	0.349055
novel_circ_0014244	0.349055
novel_circ_0018139	0.349055
novel_circ_0010564	0.348809
novel_circ_0005491	0.348315
novel_circ_0002112	0.346341
novel_circ_0007253	0.345847
novel_circ_0016197	0.345354
novel_circ_0007064	0.34486
novel_circ_0019749	0.344614
novel_circ_0019929	0.344614
novel_circ_0018663	0.343627
novel_circ_0016065	0.34338
novel_circ_0026321	0.342886
novel_circ_0014510	0.342886
novel_circ_0011207	0.34264
novel_circ_0007503	0.342393
novel_circ_0009100	0.342146
novel_circ_0012538	0.341899
novel_circ_0020819	0.341653
novel_circ_0011052	0.341653
novel_circ_0023139	0.340912
novel_circ_0003189	0.340666
novel_circ_0007464	0.340666
novel_circ_0000150	0.340172
novel_circ_0008191	0.340172
novel_circ_0005349	0.339925
novel_circ_0010097	0.339679
novel_circ_0016891	0.339185
novel_circ_0002841	0.338692
novel_circ_0010532	0.338692
novel_circ_0019201	0.338445
novel_circ_0014188	0.338445
novel_circ_0019073	0.338198
novel_circ_0025728	0.338198
novel_circ_0019291	0.337705
novel_circ_0020658	0.337211
novel_circ_0011093	0.337211
novel_circ_0002936	0.337211
novel_circ_0018375	0.336964
novel_circ_0001815	0.336964
novel_circ_0020149	0.336718
novel_circ_0021482	0.336471
novel_circ_0024419	0.336471
novel_circ_0004029	0.336471
novel_circ_0012400	0.336471
novel_circ_0011343	0.336224
novel_circ_0025499	0.336224
novel_circ_0018747	0.335977
novel_circ_0020830	0.335977
novel_circ_0024034	0.33573
novel_circ_0013111	0.33573
novel_circ_0018932	0.335484
novel_circ_0010031	0.335237
novel_circ_0002022	0.334743
novel_circ_0008468	0.334743
novel_circ_0008892	0.334497
novel_circ_0017559	0.33425
novel_circ_0013319	0.333756
novel_circ_0024331	0.33351
novel_circ_0014380	0.333016
novel_circ_0002132	0.332769
novel_circ_0015681	0.332769
novel_circ_0017903	0.332523
novel_circ_0013097	0.332523
novel_circ_0017399	0.332523
novel_circ_0004795	0.331289
novel_circ_0013141	0.331289
novel_circ_0013692	0.331289
novel_circ_0015044	0.330302
novel_circ_0015337	0.329315
novel_circ_0009093	0.329068
novel_circ_0008638	0.328821
novel_circ_0012358	0.328575
novel_circ_0006140	0.328081
novel_circ_0012208	0.328081
novel_circ_0016263	0.327834
novel_circ_0015275	0.327834
novel_circ_0022454	0.327834
novel_circ_0024451	0.327341
novel_circ_0023858	0.327341
novel_circ_0018522	0.327094
novel_circ_0021806	0.326847
novel_circ_0026128	0.326601
novel_circ_0024933	0.324626
novel_circ_0010524	0.32438
novel_circ_0021189	0.32438
novel_circ_0021898	0.32438
novel_circ_0001559	0.324133
novel_circ_0003427	0.323886
novel_circ_0006442	0.323886
novel_circ_0023182	0.323639
novel_circ_0018941	0.322652
novel_circ_0018925	0.322406
novel_circ_0024951	0.321912
novel_circ_0026297	0.321912
novel_circ_0000853	0.321665
novel_circ_0013904	0.321419
novel_circ_0023355	0.321419
novel_circ_0001950	0.321172
novel_circ_0019388	0.320678
novel_circ_0005943	0.320432
novel_circ_0020525	0.319938
novel_circ_0015428	0.319691
novel_circ_0002866	0.319198
novel_circ_0003481	0.318704
novel_circ_0002075	0.318704
novel_circ_0002219	0.318211
novel_circ_0017859	0.317471
novel_circ_0020398	0.317224
novel_circ_0013089	0.317224
novel_circ_0004341	0.316237
novel_circ_0021090	0.316237
novel_circ_0000566	0.315497
novel_circ_0000386	0.315497
novel_circ_0013608	0.315003
novel_circ_0015056	0.314756
novel_circ_0004414	0.314756
novel_circ_0015906	0.31451
novel_circ_0004415	0.314016
novel_circ_0012680	0.313029
novel_circ_0012054	0.312782
novel_circ_0012894	0.312535
novel_circ_0017934	0.312535
novel_circ_0002244	0.311795
novel_circ_0013519	0.311548
novel_circ_0006440	0.311548
novel_circ_0008430	0.311302
novel_circ_0021704	0.310808
novel_circ_0000752	0.310561
novel_circ_0007168	0.310315
novel_circ_0005470	0.309821
novel_circ_0024287	0.309574
novel_circ_0001084	0.309328
novel_circ_0016543	0.309081
novel_circ_0023819	0.308834
novel_circ_0010165	0.308341
novel_circ_0023028	0.308341
novel_circ_0011015	0.308094
novel_circ_0019628	0.308094
novel_circ_0001676	0.307354
novel_circ_0013207	0.307354
novel_circ_0010105	0.307354
novel_circ_0016210	0.307107
novel_circ_0001339	0.30686
novel_circ_0017873	0.305873
novel_circ_0021214	0.305873
novel_circ_0008147	0.305626
novel_circ_0002300	0.30538
novel_circ_0010329	0.305133
novel_circ_0017529	0.304639
novel_circ_0017340	0.304639
novel_circ_0007335	0.304393
novel_circ_0019961	0.304146
novel_circ_0017292	0.303652
novel_circ_0008991	0.302912
novel_circ_0006571	0.302665
novel_circ_0009365	0.302418
novel_circ_0019292	0.302418
novel_circ_0021185	0.302418
novel_circ_0013940	0.301925
novel_circ_0002689	0.301431
novel_circ_0017465	0.301431
novel_circ_0016279	0.300198
novel_circ_0000749	0.299211
novel_circ_0019866	0.299211
novel_circ_0008957	0.299211
novel_circ_0016456	0.298224
novel_circ_0003801	0.29773
novel_circ_0005688	0.29773
novel_circ_0000697	0.297237
novel_circ_0010103	0.296743
novel_circ_0019092	0.296743
novel_circ_0013418	0.296496
novel_circ_0006787	0.296496
novel_circ_0017888	0.295263
novel_circ_0007708	0.295263
novel_circ_0024491	0.294276
novel_circ_0022585	0.294029
novel_circ_0021847	0.292795
novel_circ_0010655	0.292795
novel_circ_0010333	0.292548
novel_circ_0022224	0.292055
novel_circ_0014651	0.292055
novel_circ_0015063	0.292055
novel_circ_0019089	0.290574
novel_circ_0025774	0.290327
novel_circ_0023868	0.290327
novel_circ_0003197	0.290327
novel_circ_0016870	0.290081
novel_circ_0024814	0.290081
novel_circ_0011388	0.289587
novel_circ_0000278	0.289587
novel_circ_0000370	0.28934
novel_circ_0005364	0.28934
novel_circ_0013666	0.289094
novel_circ_0001332	0.2886
novel_circ_0018424	0.28786
novel_circ_0010369	0.28786
novel_circ_0025823	0.28786
novel_circ_0004100	0.287613
novel_circ_0001527	0.286873
novel_circ_0005908	0.286873
novel_circ_0011625	0.286626
novel_circ_0017225	0.285886
novel_circ_0010949	0.285639
novel_circ_0023581	0.284652
novel_circ_0023896	0.283172
novel_circ_0003672	0.282431
novel_circ_0005636	0.280457
novel_circ_0009835	0.280457
novel_circ_0023077	0.278977
novel_circ_0018678	0.27873
novel_circ_0005521	0.27873
novel_circ_0015629	0.27873
novel_circ_0016855	0.278483
novel_circ_0006245	0.278236
novel_circ_0023449	0.278236
novel_circ_0025513	0.277496
novel_circ_0016879	0.277249
novel_circ_0010965	0.276509
novel_circ_0019697	0.276262
novel_circ_0014986	0.275522
novel_circ_0003046	0.274782
novel_circ_0019231	0.274535
[truncated: 14,384 more rows]

## Sheet: RX_circRNA
	Feature	Gain	Cover	Frequency
1	novel_circ_0000180	0.32806	0.314859	0.295165
2	novel_circ_0000365	0.110259	0.0973959	0.0839695
3	novel_circ_0000027	0.066029	0.0631482	0.0661578
4	novel_circ_0000031	0.0658417	0.0632689	0.0636132
5	novel_circ_0000366	0.0602535	0.0493175	0.043257
6	novel_circ_0000174	0.0569091	0.0625721	0.0661578
7	novel_circ_0000126	0.0414665	0.0413023	0.0407125
8	novel_circ_0000019	0.038456	0.045199	0.0534351
9	novel_circ_0000011	0.0258818	0.0299456	0.0356234
10	novel_circ_0000220	0.0239469	0.029993	0.0330789
11	novel_circ_0000020	0.0239441	0.0219946	0.0229008
12	novel_circ_0000367	0.0166199	0.0180848	0.0178117
13	novel_circ_0000050	0.012926	0.00846847	0.00763359
14	novel_circ_0000159	0.0113088	0.0124827	0.0127226
15	novel_circ_0000051	0.0111285	0.0120732	0.0127226
16	novel_circ_0000813	0.0109525	0.00933571	0.00763359
17	novel_circ_0000057	0.0102957	0.0140799	0.0152672
18	novel_circ_0000331	0.00709798	0.00698329	0.00763359
19	novel_circ_0001329	0.00703908	0.00361103	0.00254453
20	novel_circ_0000113	0.00701643	0.00694859	0.00763359
21	novel_circ_0000349	0.00698218	0.00731567	0.00763359
22	novel_circ_0000285	0.00538748	0.00698356	0.00763359
23	novel_circ_0000046	0.00534647	0.00673324	0.00763359
24	novel_circ_0000269	0.00455538	0.0032013	0.00254453
25	novel_circ_0000137	0.00429611	0.00469582	0.00508906
26	novel_circ_0000998	0.00402509	0.00335832	0.00254453
27	novel_circ_0000596	0.00368123	0.00307118	0.00254453
28	novel_circ_0000278	0.00362043	0.00471809	0.00508906
29	novel_circ_0000200	0.00336276	0.00584734	0.00763359
30	novel_circ_0000075	0.00310307	0.00297484	0.00254453
31	novel_circ_0000239	0.00297483	0.00590937	0.00763359
32	novel_circ_0000195	0.00227635	0.00233882	0.00254453
33	novel_circ_0001178	0.00216387	0.00258744	0.00254453
34	novel_circ_0000064	0.00211016	0.00504725	0.00763359
35	novel_circ_0000181	0.001635	0.00348769	0.00508906
36	novel_circ_0000706	0.00163369	0.00233925	0.00254453
37	novel_circ_0000611	0.00140081	0.00363777	0.00508906
38	novel_circ_0000150	0.00123819	0.00195836	0.00254453
39	novel_circ_0000881	0.00120533	0.00202105	0.00254453
40	novel_circ_0000766	0.00116654	0.00357649	0.00508906
41	novel_circ_0001893	0.000679757	0.00187062	0.00254453
42	novel_circ_0001588	0.000653106	0.00177519	0.00254453
43	novel_circ_0000076	0.000608657	0.00196797	0.00254453
44	novel_circ_0000747	0.000460476	0.00151967	0.00254453

## Sheet: RF_miRNA
mi_ID	Gini
novel_miR_192	5.78778
oar.miR.496.3p	5.69917
novel_miR_366	5.67624
novel_miR_41	5.30315
novel_miR_459	3.80414
novel_miR_4	3.59312
novel_miR_392	3.26462
oar.miR.10b	2.50373
novel_miR_384	2.47154
novel_miR_77	2.40332
novel_miR_107	2.34018
oar.miR.200b	2.20512
oar.miR.487a.5p	1.99678
novel_miR_200	1.97018
oar.miR.200c	1.89068
novel_miR_422	1.75188
novel_miR_260	1.66215
novel_miR_119	1.63598
novel_miR_176	1.62432
novel_miR_324	1.55072
novel_miR_333	1.50645
novel_miR_426	1.31158
novel_miR_191	1.21231
novel_miR_291	1.15249
novel_miR_142	1.02746
novel_miR_130	0.987195
novel_miR_340	0.97973
novel_miR_375	0.751364
novel_miR_100	0.744121
oar.miR.323a.3p	0.741519
oar.miR.379.3p	0.695647
novel_miR_438	0.692053
oar.miR.299.5p	0.688547
oar.miR.370.3p	0.642583
oar.miR.376a.5p	0.600821
oar.miR.376e.3p	0.540666
novel_miR_171	0.47515
oar.miR.376a.3p	0.4634
novel_miR_358	0.413987
novel_miR_395	0.399932
oar.miR.29b	0.38205
oar.miR.29a	0.380143
oar.miR.3957.3p	0.354861
oar.miR.494.3p	0.332225
novel_miR_178	0.291968
oar.miR.30d	0.26865
novel_miR_174	0.265885
oar.miR.150	0.250071
oar.miR.433.3p	0.219605
oar.miR.485.3p	0.2152
oar.miR.362	0.186943
novel_miR_56	0.179291
novel_miR_78	0.17925
oar.miR.376c.3p	0.128644
oar.miR.136	0.122957
oar.miR.200a	0.113847
novel_miR_456	0.0649609
novel_miR_279	0.0639006
oar.miR.431	0.0580955
oar.miR.323a.5p	0.0475888
novel_miR_351	0.0407765
oar.miR.541.3p	0.0333258
novel_miR_143	0.0302293
oar.miR.21	0.0279481
novel_miR_290	0.0268587
novel_miR_2	0.0165585
novel_miR_129	0.0108705
oar.miR.133	0.00788439
novel_miR_73	-0.000859773
oar.miR.376d	-0.00606019
novel_miR_96	-0.0172629
novel_miR_201	-0.017664
oar.miR.329a.3p	-0.0219688
oar.miR.3957.5p	-0.0253739
novel_miR_16	-0.0314958
novel_miR_389	-0.0325123
novel_miR_85	-0.0440939
oar.miR.106a	-0.06055
oar.miR.3958.5p	-0.0611544
oar.miR.539.5p	-0.0625772
oar.miR.19b	-0.0696727
oar.miR.17.5p	-0.0871348
oar.miR.370.5p	-0.125855
oar.miR.323b	-0.127326
novel_miR_105	-0.131453
oar.miR.495.5p	-0.138656
oar.miR.23b	-0.139028
oar.miR.194	-0.139416
oar.miR.380.5p	-0.13984
novel_miR_311	-0.151973
novel_miR_383	-0.171268
oar.miR.329b.3p	-0.173886
novel_miR_89	-0.17785
oar.miR.23a	-0.182987
oar.miR.409.3p	-0.183549
oar.miR.99a	-0.185538
novel_miR_225	-0.185667
oar.miR.544.3p	-0.187883
novel_miR_434	-0.193492
novel_miR_158	-0.194159
oar.miR.125b	-0.202258
oar.miR.380.3p	-0.208223
oar.miR.544.5p	-0.211914
oar.miR.432	-0.212938
oar.miR.1185.5p	-0.214385
novel_miR_166	-0.214907
oar.miR.376e.5p	-0.216614
novel_miR_124	-0.223066
oar.miR.1197.3p	-0.231021
oar.miR.154b.3p	-0.244886
oar.miR.487a.3p	-0.247673
oar.miR.665.3p	-0.260347
novel_miR_74	-0.260986
novel_miR_68	-0.262717
oar.miR.493.3p	-0.264284
novel_miR_92	-0.265078
oar.let.7c	-0.272069
oar.miR.377.3p	-0.277144
oar.miR.382.3p	-0.277554
novel_miR_72	-0.286658
novel_miR_21	-0.290795
oar.miR.181a	-0.298736
oar.miR.154a.5p	-0.299125
oar.miR.410.3p	-0.299939
oar.miR.27a	-0.300691
oar.miR.134.3p	-0.306657
novel_miR_79	-0.30934
oar.miR.493.5p	-0.316273
oar.miR.30a.3p	-0.316619
oar.miR.376b.3p	-0.318492
novel_miR_239	-0.321299
novel_miR_354	-0.3241
novel_miR_298	-0.332536
oar.miR.154a.3p	-0.3389
oar.miR.323c	-0.339983
novel_miR_61	-0.341853
novel_miR_413	-0.351722
oar.miR.655.3p	-0.358447
oar.miR.103	-0.358778
novel_miR_91	-0.358923
oar.miR.487b.5p	-0.359262
novel_miR_254	-0.360584
novel_miR_33	-0.362632
oar.miR.376c.5p	-0.369334
novel_miR_229	-0.370236
oar.miR.3956.5p	-0.373341
oar.miR.299.3p	-0.37375
novel_miR_417	-0.384326
oar.miR.221	-0.384981
novel_miR_396	-0.39244
oar.miR.411a.5p	-0.393242
novel_miR_435	-0.393253
novel_miR_302	-0.393334
novel_miR_197	-0.394436
novel_miR_420	-0.395197
oar.miR.30a.5p	-0.39566
oar.miR.26a	-0.40265
oar.miR.654.3p	-0.41364
oar.miR.1185.3p	-0.413685
novel_miR_114	-0.413749
oar.let.7i	-0.413965
oar.miR.668.3p	-0.419572
novel_miR_253	-0.421551
novel_miR_209	-0.421794
novel_miR_421	-0.423183
novel_miR_433	-0.423598
novel_miR_8	-0.424205
oar.let.7g	-0.428888
oar.miR.758.3p	-0.430067
novel_miR_126	-0.430191
oar.miR.191	-0.43467
oar.miR.541.5p	-0.440718
oar.miR.377.5p	-0.442679
oar.miR.3955.5p	-0.445755
oar.miR.381.3p	-0.448446
oar.miR.106b	-0.450283
oar.miR.134.5p	-0.452129
novel_miR_346	-0.45769
oar.miR.30b	-0.461607
oar.let.7f	-0.462497
novel_miR_30	-0.464078
oar.let.7a	-0.464659
oar.miR.143	-0.468326
oar.miR.495.3p	-0.46967
novel_miR_187	-0.470083
oar.miR.539.3p	-0.470806
novel_miR_169	-0.471498
oar.miR.10a	-0.473008
novel_miR_348	-0.473611
oar.miR.382.5p	-0.474056
oar.miR.26b	-0.475692
novel_miR_403	-0.475752
oar.miR.3959.3p	-0.475971
oar.miR.374b	-0.477805
oar.let.7b	-0.478258
oar.miR.127	-0.479139
oar.miR.3955.3p	-0.480184
oar.miR.16b	-0.480348
oar.miR.25	-0.486249
novel_miR_36	-0.486955
oar.miR.411b.5p	-0.487303
oar.miR.374a	-0.487716
novel_miR_286	-0.489122
oar.miR.30c	-0.491748
oar.miR.148a	-0.492467
oar.miR.107	-0.495505
oar.miR.218a	-0.496482
oar.miR.329b.5p	-0.497077
oar.miR.369.3p	-0.497313
oar.let.7d	-0.498262
oar.miR.154b.5p	-0.498461
oar.miR.409.5p	-0.499678
novel_miR_37	-0.499789
oar.miR.487b.3p	-0.500065
oar.miR.494.5p	-0.50208
oar.miR.543.3p	-0.50367
oar.miR.411a.3p	-0.50498
oar.miR.22.3p	-0.504998
oar.miR.411b.3p	-0.507566
oar.miR.543.5p	-0.509144
oar.miR.379.5p	-0.510141
novel_miR_223	-0.510147
novel_miR_373	-0.510809
oar.miR.152	-0.511982
oar.miR.412.3p	-0.516427
novel_miR_397	-0.519321
novel_miR_376	-0.519483
oar.miR.3959.5p	-0.519802
novel_miR_410	-0.520018
oar.miR.199a.3p	-0.521576
novel_miR_442	-0.523458
novel_miR_415	-0.524379
novel_miR_230	-0.524995
oar.miR.485.5p	-0.527583
oar.miR.3958.3p	-0.53377
novel_miR_452	-0.535544
oar.miR.496.5p	-0.536057
novel_miR_222	-0.538346
oar.miR.369.5p	-0.543721
novel_miR_448	-0.543724
novel_miR_393	-0.544973
novel_miR_205	-0.54567
novel_miR_331	-0.547182
novel_miR_424	-0.552475
novel_miR_215	-0.556645
novel_miR_198	-0.564024
novel_miR_380	-0.57194
oar.miR.412.5p	-0.578634
oar.miR.433.5p	-0.583684
novel_miR_455	-0.583874
novel_miR_256	-0.589462
novel_miR_450	-0.591048
oar.miR.410.5p	-0.591114
novel_miR_444	-0.592471
novel_miR_447	-0.594949
novel_miR_461	-0.596465
novel_miR_453	-0.596467
novel_miR_344	-0.596579
novel_miR_259	-0.597218
novel_miR_374	-0.598778
novel_miR_289	-0.598962
oar.miR.3956.3p	-0.599426
novel_miR_307	-0.600044
oar.miR.668.5p	-0.601586
novel_miR_217	-0.604103
novel_miR_240	-0.606209
oar.miR.1193.3p	-0.606439
oar.miR.1193.5p	-0.609215
oar.miR.655.5p	-0.609869
novel_miR_334	-0.610294
novel_miR_283	-0.61238

## Sheet: RX_miRNA
	Feature	Gain	Cover	Frequency
1	novel_miR_192	0.146085	0.115902	0.110656
2	oar-miR-496-3p	0.132177	0.10662	0.0942623
3	novel_miR_366	0.11285	0.0960726	0.0860656
4	novel_miR_459	0.0651963	0.0633805	0.057377
5	novel_miR_200	0.0597034	0.0577473	0.057377
6	novel_miR_107	0.0587143	0.0455036	0.0491803
7	novel_miR_392	0.0575635	0.0724535	0.0737705
8	novel_miR_41	0.031135	0.0310399	0.0286885
9	novel_miR_333	0.0308414	0.0450741	0.0491803
10	novel_miR_100	0.0303784	0.0270265	0.0286885
11	novel_miR_426	0.0273132	0.0319324	0.0286885
12	oar-miR-200c	0.0271073	0.0332327	0.0327869
13	oar-miR-487a-5p	0.0257033	0.0187654	0.0163934
14	novel_miR_384	0.0220548	0.0159718	0.0163934
15	novel_miR_291	0.0218099	0.0143001	0.0122951
16	novel_miR_260	0.0215084	0.0198107	0.0204918
17	novel_miR_176	0.0211136	0.0222068	0.0204918
18	novel_miR_119	0.0167125	0.0177849	0.0204918
19	novel_miR_4	0.0154609	0.0130529	0.0122951
20	oar-miR-376a-3p	0.0147075	0.0141708	0.0122951
21	novel_miR_324	0.0122269	0.00840727	0.00819672
22	oar-miR-376e-3p	0.00877814	0.0154373	0.0163934
23	novel_miR_422	0.00722251	0.00851506	0.00819672
24	novel_miR_178	0.00700625	0.00978409	0.0122951
25	novel_miR_438	0.00678556	0.00385973	0.00409836
26	novel_miR_142	0.00580098	0.0105543	0.0122951
27	novel_miR_340	0.00496808	0.0191253	0.0245902
28	novel_miR_191	0.00467045	0.00375585	0.00409836
29	novel_miR_279	0.00387652	0.00385397	0.00409836
30	oar-miR-376c-3p	0.000216596	0.00945649	0.0122951
31	novel_miR_456	0.000175722	0.0122645	0.0163934
32	novel_miR_174	3.44e-05	0.0108562	0.0163934
33	novel_miR_130	3.42e-05	0.00279303	0.00409836
34	novel_miR_171	3.41e-05	0.00548218	0.00819672
35	oar-miR-431	1.2e-05	0.00281694	0.00409836
36	novel_miR_143	1.19e-05	0.00822072	0.0122951
37	novel_miR_129	1.03e-05	0.00276853	0.00409836
