# Supplementary material for: Non-Coding Transcriptome Provides Novel Insights into the Escherichia coli F17 Susceptibility of Sheep Lamb
Source: Biology (Basel). 2022 Feb 22;11(3):348. doi: 10.3390/biology11030348 (PMC8945857; doi:10.3390/biology11030348)
Supplement: Supplementary file 1 [file biology-11-00348-s001.zip › Supplementary Table S6.xlsx]

## Sheet: circRNA-miRNA-mRNA
Table S6. Competing triplets of circRNA-miRNA-mRNA and lncRNA-miRNA-mRNA
	miRNA_ID	mRNA_ID	PCC.x	pvalue.x	circRNA_ID	PCC.y	pvalue.y
1	novel_miR_107	XM_004018003.3	-0.829637	0.000842663	novel_circ_0007459	-0.829821	0.000838408
2	novel_miR_107	XM_004018003.3	-0.829637	0.000842663	novel_circ_0010597	-0.835554	0.000713626
3	novel_miR_107	XM_012178205.2	-0.803109	0.00165686	novel_circ_0007459	-0.829821	0.000838408
4	novel_miR_107	XM_012178205.2	-0.803109	0.00165686	novel_circ_0010597	-0.835554	0.000713626
5	novel_miR_107	XM_004008562.3	-0.825525	0.000942463	novel_circ_0007459	-0.829821	0.000838408
6	novel_miR_107	XM_004008562.3	-0.825525	0.000942463	novel_circ_0010597	-0.835554	0.000713626
7	novel_miR_107	NM_001009802.1	-0.805933	0.00154922	novel_circ_0007459	-0.829821	0.000838408
8	novel_miR_107	NM_001009802.1	-0.805933	0.00154922	novel_circ_0010597	-0.835554	0.000713626
9	novel_miR_107	XM_004006604.3	-0.898631	7.09514e-05	novel_circ_0007459	-0.829821	0.000838408
10	novel_miR_107	XM_004006604.3	-0.898631	7.09514e-05	novel_circ_0010597	-0.835554	0.000713626
11	novel_miR_107	XM_004008666.3	-0.807872	0.0014785	novel_circ_0007459	-0.829821	0.000838408
12	novel_miR_107	XM_004008666.3	-0.807872	0.0014785	novel_circ_0010597	-0.835554	0.000713626
13	novel_miR_107	NM_001009311.1	-0.783745	0.00255728	novel_circ_0007459	-0.829821	0.000838408
14	novel_miR_107	NM_001009311.1	-0.783745	0.00255728	novel_circ_0010597	-0.835554	0.000713626
15	novel_miR_107	XM_015100927.1	-0.788317	0.00231731	novel_circ_0007459	-0.829821	0.000838408
16	novel_miR_107	XM_015100927.1	-0.788317	0.00231731	novel_circ_0010597	-0.835554	0.000713626
17	novel_miR_107	XM_015100813.1	-0.842243	0.000586753	novel_circ_0007459	-0.829821	0.000838408
18	novel_miR_107	XM_015100813.1	-0.842243	0.000586753	novel_circ_0010597	-0.835554	0.000713626
19	novel_miR_119	XM_004018441.3	-0.758524	0.00423979	novel_circ_0016608	-0.760803	0.00406045
20	novel_miR_119	XM_004018441.3	-0.758524	0.00423979	novel_circ_0021390	-0.861694	0.000314502
21	novel_miR_158	XM_004006553.2	-0.782176	0.00264389	novel_circ_0010324	-0.756836	0.00437656
22	novel_miR_158	XM_004006553.2	-0.782176	0.00264389	novel_circ_0006796	-0.75009	0.00495648
23	novel_miR_158	XM_004005588.3	-0.774706	0.00308719	novel_circ_0010324	-0.756836	0.00437656
24	novel_miR_158	XM_004005588.3	-0.774706	0.00308719	novel_circ_0006796	-0.75009	0.00495648
25	novel_miR_331	XM_004014932.3	-0.766789	0.00361653	novel_circ_0017892	-0.900473	6.49e-05
26	novel_miR_331	XM_015103710.1	-0.855319	0.000389582	novel_circ_0017892	-0.900473	6.49e-05
27	novel_miR_36	XM_004020510.3	-0.818413	0.00113632	novel_circ_0025550	-0.792691	0.00210417
28	novel_miR_433	XM_015092237.1	-0.757214	0.0043456	novel_circ_0021208	-0.760903	0.00405271
29	novel_miR_433	XM_004012495.3	-0.837977	0.000665426	novel_circ_0021208	-0.760903	0.00405271
30	novel_miR_433	XM_004014424.3	-0.755217	0.00451079	novel_circ_0021208	-0.760903	0.00405271
31	novel_miR_68	XM_012162273.1	-0.798525	0.00184361	novel_circ_0021877	-0.778103	0.0028791
32	novel_miR_77	NM_001114766.1	-0.869294	0.000240271	novel_circ_0017406	-0.751711	0.00481212
33	oar-miR-143	XM_015101753.1	-0.798381	0.00184972	novel_circ_0010721	-0.752935	0.00470519
34	oar-miR-143	XM_015101753.1	-0.798381	0.00184972	novel_circ_0017265	-0.756814	0.0043783
35	oar-miR-143	XM_015101753.1	-0.798381	0.00184972	novel_circ_0004410	-0.769443	0.00343199
36	oar-miR-143	XM_015101753.1	-0.798381	0.00184972	novel_circ_0016777	-0.7658	0.0036872
37	oar-miR-370-3p	XM_012103661.2	-0.822125	0.00103166	novel_circ_0012869	-0.753777	0.00463278
38	oar-miR-370-3p	XM_015104981.1	-0.770665	0.00334943	novel_circ_0012869	-0.753777	0.00463278
39	oar-miR-370-3p	XM_004021816.2	-0.772296	0.00324162	novel_circ_0012869	-0.753777	0.00463278
40	oar-miR-370-3p	XM_012189236.2	-0.769951	0.00339749	novel_circ_0012869	-0.753777	0.00463278
41	oar-miR-370-3p	XM_004008711.3	-0.765662	0.00369715	novel_circ_0012869	-0.753777	0.00463278
42	oar-miR-370-3p	XM_004006380.3	-0.798262	0.00185479	novel_circ_0012869	-0.753777	0.00463278
43	oar-miR-370-3p	XM_012104576.1	-0.815317	0.00122973	novel_circ_0012869	-0.753777	0.00463278
44	oar-miR-370-3p	XM_012116960.2	-0.751551	0.00482623	novel_circ_0012869	-0.753777	0.00463278
45	oar-miR-370-3p	XM_015102476.1	-0.872544	0.000213056	novel_circ_0012869	-0.753777	0.00463278
46	oar-miR-370-3p	XM_004002735.2	-0.774706	0.00308723	novel_circ_0012869	-0.753777	0.00463278

## Sheet: lncRNA-miRNA-mRNA
	miRNA_ID	mRNA_ID	PCC.x	pvalue.x	lRNA_ID	PCC.y	pvalue.y
1	novel_miR_107	XM_004006604.3	-0.898631	7.09514e-05	TCONS_00036066	-0.786249	0.00242361
2	novel_miR_107	XM_004006604.3	-0.898631	7.09514e-05	XR_001020640.1	-0.844172	0.000553636
3	novel_miR_107	XM_004006604.3	-0.898631	7.09514e-05	TCONS_00069454	-0.763097	0.00388568
4	novel_miR_107	XM_004006604.3	-0.898631	7.09514e-05	XR_001040147.1	-0.807487	0.00149234
5	novel_miR_107	XM_004006604.3	-0.898631	7.09514e-05	TCONS_00044884	-0.845386	0.00053355
6	novel_miR_107	XM_004006604.3	-0.898631	7.09514e-05	XR_001435667.1	-0.75355	0.00465219
7	novel_miR_107	XM_004006604.3	-0.898631	7.09514e-05	TCONS_00252671	-0.827264	0.000899211
8	novel_miR_107	XM_004006604.3	-0.898631	7.09514e-05	XR_001023088.2	-0.764597	0.00377457
9	novel_miR_107	XM_004006604.3	-0.898631	7.09514e-05	TCONS_00239843	-0.755065	0.00452355
10	novel_miR_107	XM_004006604.3	-0.898631	7.09514e-05	TCONS_00041506	-0.89211	9.58133e-05
11	novel_miR_107	XM_004006604.3	-0.898631	7.09514e-05	XR_001020666.1	-0.775855	0.00301558
12	novel_miR_107	XM_004006604.3	-0.898631	7.09514e-05	TCONS_00076541	-0.767467	0.00356866
13	novel_miR_107	XM_004006604.3	-0.898631	7.09514e-05	TCONS_00031761	-0.793732	0.00205575
14	novel_miR_107	XM_004006604.3	-0.898631	7.09514e-05	XR_001027589.2	-0.7792	0.00281426
15	novel_miR_107	XM_004006604.3	-0.898631	7.09514e-05	XR_001435326.1	-0.864771	0.000282569
16	novel_miR_107	XM_004006604.3	-0.898631	7.09514e-05	TCONS_00153481	-0.804097	0.00161856
17	novel_miR_107	XM_004006604.3	-0.898631	7.09514e-05	TCONS_00236914	-0.890954	0.000100855
18	novel_miR_107	XM_004006604.3	-0.898631	7.09514e-05	TCONS_00212250	-0.847071	0.000506602
19	novel_miR_107	XM_004006604.3	-0.898631	7.09514e-05	XR_001434340.1	-0.803545	0.00163987
20	novel_miR_107	XM_004006604.3	-0.898631	7.09514e-05	XR_001433783.1	-0.787632	0.00235212
21	novel_miR_107	XM_004006604.3	-0.898631	7.09514e-05	XR_001434835.1	-0.831497	0.00080032
22	novel_miR_107	XM_004006604.3	-0.898631	7.09514e-05	TCONS_00236310	-0.79568	0.0019674
23	novel_miR_107	XM_004006604.3	-0.898631	7.09514e-05	TCONS_00241499	-0.753529	0.00465397
24	novel_miR_107	XM_004006604.3	-0.898631	7.09514e-05	TCONS_00230196	-0.820656	0.00107214
25	novel_miR_107	XM_004006604.3	-0.898631	7.09514e-05	TCONS_00133875	-0.767819	0.00354403
26	novel_miR_107	XM_004006604.3	-0.898631	7.09514e-05	TCONS_00034389	-0.821224	0.00105635
27	novel_miR_107	XM_004006604.3	-0.898631	7.09514e-05	TCONS_00134316	-0.821492	0.00104896
28	novel_miR_107	XM_004006604.3	-0.898631	7.09514e-05	TCONS_00189385	-0.797246	0.0018985
29	novel_miR_107	XM_004006604.3	-0.898631	7.09514e-05	TCONS_00049925	-0.778647	0.00284682
30	novel_miR_107	XM_004006604.3	-0.898631	7.09514e-05	TCONS_00167826	-0.778497	0.00285568
31	novel_miR_107	XM_004006604.3	-0.898631	7.09514e-05	TCONS_00160089	-0.755545	0.00448335
32	novel_miR_107	XM_004006604.3	-0.898631	7.09514e-05	TCONS_00095610	-0.852701	0.000424174
33	novel_miR_107	XM_004006604.3	-0.898631	7.09514e-05	TCONS_00144266	-0.77595	0.00300974
34	novel_miR_107	XM_004006604.3	-0.898631	7.09514e-05	TCONS_00219965	-0.76337	0.00386531
35	novel_miR_107	XM_004006604.3	-0.898631	7.09514e-05	TCONS_00060947	-0.815421	0.00122648
36	novel_miR_107	XM_004006604.3	-0.898631	7.09514e-05	TCONS_00075841	-0.755755	0.00446581
37	novel_miR_107	XM_004006604.3	-0.898631	7.09514e-05	TCONS_00022887	-0.77671	0.00296308
38	novel_miR_107	XM_004006604.3	-0.898631	7.09514e-05	TCONS_00112492	-0.76451	0.00378091
39	novel_miR_107	XM_004006604.3	-0.898631	7.09514e-05	TCONS_00141957	-0.774058	0.00312816
40	novel_miR_107	XM_004006604.3	-0.898631	7.09514e-05	TCONS_00031327	-0.753957	0.00461734
41	novel_miR_107	XM_004006604.3	-0.898631	7.09514e-05	XR_001434310.1	-0.761942	0.0039729
42	novel_miR_107	XM_004006604.3	-0.898631	7.09514e-05	XR_001020665.1	-0.805433	0.00156787
43	novel_miR_107	XM_004006604.3	-0.898631	7.09514e-05	TCONS_00131648	-0.761342	0.00401882
44	novel_miR_107	XM_012178205.2	-0.803109	0.00165686	TCONS_00036066	-0.786249	0.00242361
45	novel_miR_107	XM_012178205.2	-0.803109	0.00165686	XR_001020640.1	-0.844172	0.000553636
46	novel_miR_107	XM_012178205.2	-0.803109	0.00165686	TCONS_00069454	-0.763097	0.00388568
47	novel_miR_107	XM_012178205.2	-0.803109	0.00165686	XR_001040147.1	-0.807487	0.00149234
48	novel_miR_107	XM_012178205.2	-0.803109	0.00165686	TCONS_00044884	-0.845386	0.00053355
49	novel_miR_107	XM_012178205.2	-0.803109	0.00165686	XR_001435667.1	-0.75355	0.00465219
50	novel_miR_107	XM_012178205.2	-0.803109	0.00165686	TCONS_00252671	-0.827264	0.000899211
51	novel_miR_107	XM_012178205.2	-0.803109	0.00165686	XR_001023088.2	-0.764597	0.00377457
52	novel_miR_107	XM_012178205.2	-0.803109	0.00165686	TCONS_00239843	-0.755065	0.00452355
53	novel_miR_107	XM_012178205.2	-0.803109	0.00165686	TCONS_00041506	-0.89211	9.58133e-05
54	novel_miR_107	XM_012178205.2	-0.803109	0.00165686	XR_001020666.1	-0.775855	0.00301558
55	novel_miR_107	XM_012178205.2	-0.803109	0.00165686	TCONS_00076541	-0.767467	0.00356866
56	novel_miR_107	XM_012178205.2	-0.803109	0.00165686	TCONS_00031761	-0.793732	0.00205575
57	novel_miR_107	XM_012178205.2	-0.803109	0.00165686	XR_001027589.2	-0.7792	0.00281426
58	novel_miR_107	XM_012178205.2	-0.803109	0.00165686	XR_001435326.1	-0.864771	0.000282569
59	novel_miR_107	XM_012178205.2	-0.803109	0.00165686	TCONS_00153481	-0.804097	0.00161856
60	novel_miR_107	XM_012178205.2	-0.803109	0.00165686	TCONS_00236914	-0.890954	0.000100855
61	novel_miR_107	XM_012178205.2	-0.803109	0.00165686	TCONS_00212250	-0.847071	0.000506602
62	novel_miR_107	XM_012178205.2	-0.803109	0.00165686	XR_001434340.1	-0.803545	0.00163987
63	novel_miR_107	XM_012178205.2	-0.803109	0.00165686	XR_001433783.1	-0.787632	0.00235212
64	novel_miR_107	XM_012178205.2	-0.803109	0.00165686	XR_001434835.1	-0.831497	0.00080032
65	novel_miR_107	XM_012178205.2	-0.803109	0.00165686	TCONS_00236310	-0.79568	0.0019674
66	novel_miR_107	XM_012178205.2	-0.803109	0.00165686	TCONS_00241499	-0.753529	0.00465397
67	novel_miR_107	XM_012178205.2	-0.803109	0.00165686	TCONS_00230196	-0.820656	0.00107214
68	novel_miR_107	XM_012178205.2	-0.803109	0.00165686	TCONS_00133875	-0.767819	0.00354403
69	novel_miR_107	XM_012178205.2	-0.803109	0.00165686	TCONS_00034389	-0.821224	0.00105635
70	novel_miR_107	XM_012178205.2	-0.803109	0.00165686	TCONS_00134316	-0.821492	0.00104896
71	novel_miR_107	XM_012178205.2	-0.803109	0.00165686	TCONS_00189385	-0.797246	0.0018985
72	novel_miR_107	XM_012178205.2	-0.803109	0.00165686	TCONS_00049925	-0.778647	0.00284682
73	novel_miR_107	XM_012178205.2	-0.803109	0.00165686	TCONS_00167826	-0.778497	0.00285568
74	novel_miR_107	XM_012178205.2	-0.803109	0.00165686	TCONS_00160089	-0.755545	0.00448335
75	novel_miR_107	XM_012178205.2	-0.803109	0.00165686	TCONS_00095610	-0.852701	0.000424174
76	novel_miR_107	XM_012178205.2	-0.803109	0.00165686	TCONS_00144266	-0.77595	0.00300974
77	novel_miR_107	XM_012178205.2	-0.803109	0.00165686	TCONS_00219965	-0.76337	0.00386531
78	novel_miR_107	XM_012178205.2	-0.803109	0.00165686	TCONS_00060947	-0.815421	0.00122648
79	novel_miR_107	XM_012178205.2	-0.803109	0.00165686	TCONS_00075841	-0.755755	0.00446581
80	novel_miR_107	XM_012178205.2	-0.803109	0.00165686	TCONS_00022887	-0.77671	0.00296308
81	novel_miR_107	XM_012178205.2	-0.803109	0.00165686	TCONS_00112492	-0.76451	0.00378091
82	novel_miR_107	XM_012178205.2	-0.803109	0.00165686	TCONS_00141957	-0.774058	0.00312816
83	novel_miR_107	XM_012178205.2	-0.803109	0.00165686	TCONS_00031327	-0.753957	0.00461734
84	novel_miR_107	XM_012178205.2	-0.803109	0.00165686	XR_001434310.1	-0.761942	0.0039729
85	novel_miR_107	XM_012178205.2	-0.803109	0.00165686	XR_001020665.1	-0.805433	0.00156787
86	novel_miR_107	XM_012178205.2	-0.803109	0.00165686	TCONS_00131648	-0.761342	0.00401882
87	novel_miR_107	XM_015100927.1	-0.788317	0.00231731	TCONS_00036066	-0.786249	0.00242361
88	novel_miR_107	XM_015100927.1	-0.788317	0.00231731	XR_001020640.1	-0.844172	0.000553636
89	novel_miR_107	XM_015100927.1	-0.788317	0.00231731	TCONS_00069454	-0.763097	0.00388568
90	novel_miR_107	XM_015100927.1	-0.788317	0.00231731	XR_001040147.1	-0.807487	0.00149234
91	novel_miR_107	XM_015100927.1	-0.788317	0.00231731	TCONS_00044884	-0.845386	0.00053355
92	novel_miR_107	XM_015100927.1	-0.788317	0.00231731	XR_001435667.1	-0.75355	0.00465219
93	novel_miR_107	XM_015100927.1	-0.788317	0.00231731	TCONS_00252671	-0.827264	0.000899211
94	novel_miR_107	XM_015100927.1	-0.788317	0.00231731	XR_001023088.2	-0.764597	0.00377457
95	novel_miR_107	XM_015100927.1	-0.788317	0.00231731	TCONS_00239843	-0.755065	0.00452355
96	novel_miR_107	XM_015100927.1	-0.788317	0.00231731	TCONS_00041506	-0.89211	9.58133e-05
97	novel_miR_107	XM_015100927.1	-0.788317	0.00231731	XR_001020666.1	-0.775855	0.00301558
98	novel_miR_107	XM_015100927.1	-0.788317	0.00231731	TCONS_00076541	-0.767467	0.00356866
99	novel_miR_107	XM_015100927.1	-0.788317	0.00231731	TCONS_00031761	-0.793732	0.00205575
100	novel_miR_107	XM_015100927.1	-0.788317	0.00231731	XR_001027589.2	-0.7792	0.00281426
101	novel_miR_107	XM_015100927.1	-0.788317	0.00231731	XR_001435326.1	-0.864771	0.000282569
102	novel_miR_107	XM_015100927.1	-0.788317	0.00231731	TCONS_00153481	-0.804097	0.00161856
103	novel_miR_107	XM_015100927.1	-0.788317	0.00231731	TCONS_00236914	-0.890954	0.000100855
104	novel_miR_107	XM_015100927.1	-0.788317	0.00231731	TCONS_00212250	-0.847071	0.000506602
105	novel_miR_107	XM_015100927.1	-0.788317	0.00231731	XR_001434340.1	-0.803545	0.00163987
106	novel_miR_107	XM_015100927.1	-0.788317	0.00231731	XR_001433783.1	-0.787632	0.00235212
107	novel_miR_107	XM_015100927.1	-0.788317	0.00231731	XR_001434835.1	-0.831497	0.00080032
108	novel_miR_107	XM_015100927.1	-0.788317	0.00231731	TCONS_00236310	-0.79568	0.0019674
109	novel_miR_107	XM_015100927.1	-0.788317	0.00231731	TCONS_00241499	-0.753529	0.00465397
110	novel_miR_107	XM_015100927.1	-0.788317	0.00231731	TCONS_00230196	-0.820656	0.00107214
111	novel_miR_107	XM_015100927.1	-0.788317	0.00231731	TCONS_00133875	-0.767819	0.00354403
112	novel_miR_107	XM_015100927.1	-0.788317	0.00231731	TCONS_00034389	-0.821224	0.00105635
113	novel_miR_107	XM_015100927.1	-0.788317	0.00231731	TCONS_00134316	-0.821492	0.00104896
114	novel_miR_107	XM_015100927.1	-0.788317	0.00231731	TCONS_00189385	-0.797246	0.0018985
115	novel_miR_107	XM_015100927.1	-0.788317	0.00231731	TCONS_00049925	-0.778647	0.00284682
116	novel_miR_107	XM_015100927.1	-0.788317	0.00231731	TCONS_00167826	-0.778497	0.00285568
117	novel_miR_107	XM_015100927.1	-0.788317	0.00231731	TCONS_00160089	-0.755545	0.00448335
118	novel_miR_107	XM_015100927.1	-0.788317	0.00231731	TCONS_00095610	-0.852701	0.000424174
119	novel_miR_107	XM_015100927.1	-0.788317	0.00231731	TCONS_00144266	-0.77595	0.00300974
120	novel_miR_107	XM_015100927.1	-0.788317	0.00231731	TCONS_00219965	-0.76337	0.00386531
121	novel_miR_107	XM_015100927.1	-0.788317	0.00231731	TCONS_00060947	-0.815421	0.00122648
122	novel_miR_107	XM_015100927.1	-0.788317	0.00231731	TCONS_00075841	-0.755755	0.00446581
123	novel_miR_107	XM_015100927.1	-0.788317	0.00231731	TCONS_00022887	-0.77671	0.00296308
124	novel_miR_107	XM_015100927.1	-0.788317	0.00231731	TCONS_00112492	-0.76451	0.00378091
125	novel_miR_107	XM_015100927.1	-0.788317	0.00231731	TCONS_00141957	-0.774058	0.00312816
126	novel_miR_107	XM_015100927.1	-0.788317	0.00231731	TCONS_00031327	-0.753957	0.00461734
127	novel_miR_107	XM_015100927.1	-0.788317	0.00231731	XR_001434310.1	-0.761942	0.0039729
128	novel_miR_107	XM_015100927.1	-0.788317	0.00231731	XR_001020665.1	-0.805433	0.00156787
129	novel_miR_107	XM_015100927.1	-0.788317	0.00231731	TCONS_00131648	-0.761342	0.00401882
130	novel_miR_107	XM_015100813.1	-0.842243	0.000586753	TCONS_00036066	-0.786249	0.00242361
131	novel_miR_107	XM_015100813.1	-0.842243	0.000586753	XR_001020640.1	-0.844172	0.000553636
132	novel_miR_107	XM_015100813.1	-0.842243	0.000586753	TCONS_00069454	-0.763097	0.00388568
133	novel_miR_107	XM_015100813.1	-0.842243	0.000586753	XR_001040147.1	-0.807487	0.00149234
134	novel_miR_107	XM_015100813.1	-0.842243	0.000586753	TCONS_00044884	-0.845386	0.00053355
135	novel_miR_107	XM_015100813.1	-0.842243	0.000586753	XR_001435667.1	-0.75355	0.00465219
136	novel_miR_107	XM_015100813.1	-0.842243	0.000586753	TCONS_00252671	-0.827264	0.000899211
137	novel_miR_107	XM_015100813.1	-0.842243	0.000586753	XR_001023088.2	-0.764597	0.00377457
138	novel_miR_107	XM_015100813.1	-0.842243	0.000586753	TCONS_00239843	-0.755065	0.00452355
139	novel_miR_107	XM_015100813.1	-0.842243	0.000586753	TCONS_00041506	-0.89211	9.58133e-05
140	novel_miR_107	XM_015100813.1	-0.842243	0.000586753	XR_001020666.1	-0.775855	0.00301558
141	novel_miR_107	XM_015100813.1	-0.842243	0.000586753	TCONS_00076541	-0.767467	0.00356866
142	novel_miR_107	XM_015100813.1	-0.842243	0.000586753	TCONS_00031761	-0.793732	0.00205575
143	novel_miR_107	XM_015100813.1	-0.842243	0.000586753	XR_001027589.2	-0.7792	0.00281426
144	novel_miR_107	XM_015100813.1	-0.842243	0.000586753	XR_001435326.1	-0.864771	0.000282569
145	novel_miR_107	XM_015100813.1	-0.842243	0.000586753	TCONS_00153481	-0.804097	0.00161856
146	novel_miR_107	XM_015100813.1	-0.842243	0.000586753	TCONS_00236914	-0.890954	0.000100855
147	novel_miR_107	XM_015100813.1	-0.842243	0.000586753	TCONS_00212250	-0.847071	0.000506602
148	novel_miR_107	XM_015100813.1	-0.842243	0.000586753	XR_001434340.1	-0.803545	0.00163987
149	novel_miR_107	XM_015100813.1	-0.842243	0.000586753	XR_001433783.1	-0.787632	0.00235212
150	novel_miR_107	XM_015100813.1	-0.842243	0.000586753	XR_001434835.1	-0.831497	0.00080032
151	novel_miR_107	XM_015100813.1	-0.842243	0.000586753	TCONS_00236310	-0.79568	0.0019674
152	novel_miR_107	XM_015100813.1	-0.842243	0.000586753	TCONS_00241499	-0.753529	0.00465397
153	novel_miR_107	XM_015100813.1	-0.842243	0.000586753	TCONS_00230196	-0.820656	0.00107214
154	novel_miR_107	XM_015100813.1	-0.842243	0.000586753	TCONS_00133875	-0.767819	0.00354403
155	novel_miR_107	XM_015100813.1	-0.842243	0.000586753	TCONS_00034389	-0.821224	0.00105635
156	novel_miR_107	XM_015100813.1	-0.842243	0.000586753	TCONS_00134316	-0.821492	0.00104896
157	novel_miR_107	XM_015100813.1	-0.842243	0.000586753	TCONS_00189385	-0.797246	0.0018985
158	novel_miR_107	XM_015100813.1	-0.842243	0.000586753	TCONS_00049925	-0.778647	0.00284682
159	novel_miR_107	XM_015100813.1	-0.842243	0.000586753	TCONS_00167826	-0.778497	0.00285568
160	novel_miR_107	XM_015100813.1	-0.842243	0.000586753	TCONS_00160089	-0.755545	0.00448335
161	novel_miR_107	XM_015100813.1	-0.842243	0.000586753	TCONS_00095610	-0.852701	0.000424174
162	novel_miR_107	XM_015100813.1	-0.842243	0.000586753	TCONS_00144266	-0.77595	0.00300974
163	novel_miR_107	XM_015100813.1	-0.842243	0.000586753	TCONS_00219965	-0.76337	0.00386531
164	novel_miR_107	XM_015100813.1	-0.842243	0.000586753	TCONS_00060947	-0.815421	0.00122648
165	novel_miR_107	XM_015100813.1	-0.842243	0.000586753	TCONS_00075841	-0.755755	0.00446581
166	novel_miR_107	XM_015100813.1	-0.842243	0.000586753	TCONS_00022887	-0.77671	0.00296308
167	novel_miR_107	XM_015100813.1	-0.842243	0.000586753	TCONS_00112492	-0.76451	0.00378091
168	novel_miR_107	XM_015100813.1	-0.842243	0.000586753	TCONS_00141957	-0.774058	0.00312816
169	novel_miR_107	XM_015100813.1	-0.842243	0.000586753	TCONS_00031327	-0.753957	0.00461734
170	novel_miR_107	XM_015100813.1	-0.842243	0.000586753	XR_001434310.1	-0.761942	0.0039729
171	novel_miR_107	XM_015100813.1	-0.842243	0.000586753	XR_001020665.1	-0.805433	0.00156787
172	novel_miR_107	XM_015100813.1	-0.842243	0.000586753	TCONS_00131648	-0.761342	0.00401882
173	novel_miR_107	NM_001009311.1	-0.783745	0.00255728	TCONS_00036066	-0.786249	0.00242361
174	novel_miR_107	NM_001009311.1	-0.783745	0.00255728	XR_001020640.1	-0.844172	0.000553636
175	novel_miR_107	NM_001009311.1	-0.783745	0.00255728	TCONS_00069454	-0.763097	0.00388568
176	novel_miR_107	NM_001009311.1	-0.783745	0.00255728	XR_001040147.1	-0.807487	0.00149234
177	novel_miR_107	NM_001009311.1	-0.783745	0.00255728	TCONS_00044884	-0.845386	0.00053355
178	novel_miR_107	NM_001009311.1	-0.783745	0.00255728	XR_001435667.1	-0.75355	0.00465219
179	novel_miR_107	NM_001009311.1	-0.783745	0.00255728	TCONS_00252671	-0.827264	0.000899211
180	novel_miR_107	NM_001009311.1	-0.783745	0.00255728	XR_001023088.2	-0.764597	0.00377457
181	novel_miR_107	NM_001009311.1	-0.783745	0.00255728	TCONS_00239843	-0.755065	0.00452355
182	novel_miR_107	NM_001009311.1	-0.783745	0.00255728	TCONS_00041506	-0.89211	9.58133e-05
183	novel_miR_107	NM_001009311.1	-0.783745	0.00255728	XR_001020666.1	-0.775855	0.00301558
184	novel_miR_107	NM_001009311.1	-0.783745	0.00255728	TCONS_00076541	-0.767467	0.00356866
185	novel_miR_107	NM_001009311.1	-0.783745	0.00255728	TCONS_00031761	-0.793732	0.00205575
186	novel_miR_107	NM_001009311.1	-0.783745	0.00255728	XR_001027589.2	-0.7792	0.00281426
187	novel_miR_107	NM_001009311.1	-0.783745	0.00255728	XR_001435326.1	-0.864771	0.000282569
188	novel_miR_107	NM_001009311.1	-0.783745	0.00255728	TCONS_00153481	-0.804097	0.00161856
189	novel_miR_107	NM_001009311.1	-0.783745	0.00255728	TCONS_00236914	-0.890954	0.000100855
190	novel_miR_107	NM_001009311.1	-0.783745	0.00255728	TCONS_00212250	-0.847071	0.000506602
191	novel_miR_107	NM_001009311.1	-0.783745	0.00255728	XR_001434340.1	-0.803545	0.00163987
192	novel_miR_107	NM_001009311.1	-0.783745	0.00255728	XR_001433783.1	-0.787632	0.00235212
193	novel_miR_107	NM_001009311.1	-0.783745	0.00255728	XR_001434835.1	-0.831497	0.00080032
194	novel_miR_107	NM_001009311.1	-0.783745	0.00255728	TCONS_00236310	-0.79568	0.0019674
195	novel_miR_107	NM_001009311.1	-0.783745	0.00255728	TCONS_00241499	-0.753529	0.00465397
196	novel_miR_107	NM_001009311.1	-0.783745	0.00255728	TCONS_00230196	-0.820656	0.00107214
197	novel_miR_107	NM_001009311.1	-0.783745	0.00255728	TCONS_00133875	-0.767819	0.00354403
198	novel_miR_107	NM_001009311.1	-0.783745	0.00255728	TCONS_00034389	-0.821224	0.00105635
199	novel_miR_107	NM_001009311.1	-0.783745	0.00255728	TCONS_00134316	-0.821492	0.00104896
200	novel_miR_107	NM_001009311.1	-0.783745	0.00255728	TCONS_00189385	-0.797246	0.0018985
201	novel_miR_107	NM_001009311.1	-0.783745	0.00255728	TCONS_00049925	-0.778647	0.00284682
202	novel_miR_107	NM_001009311.1	-0.783745	0.00255728	TCONS_00167826	-0.778497	0.00285568
203	novel_miR_107	NM_001009311.1	-0.783745	0.00255728	TCONS_00160089	-0.755545	0.00448335
204	novel_miR_107	NM_001009311.1	-0.783745	0.00255728	TCONS_00095610	-0.852701	0.000424174
205	novel_miR_107	NM_001009311.1	-0.783745	0.00255728	TCONS_00144266	-0.77595	0.00300974
206	novel_miR_107	NM_001009311.1	-0.783745	0.00255728	TCONS_00219965	-0.76337	0.00386531
207	novel_miR_107	NM_001009311.1	-0.783745	0.00255728	TCONS_00060947	-0.815421	0.00122648
208	novel_miR_107	NM_001009311.1	-0.783745	0.00255728	TCONS_00075841	-0.755755	0.00446581
209	novel_miR_107	NM_001009311.1	-0.783745	0.00255728	TCONS_00022887	-0.77671	0.00296308
210	novel_miR_107	NM_001009311.1	-0.783745	0.00255728	TCONS_00112492	-0.76451	0.00378091
211	novel_miR_107	NM_001009311.1	-0.783745	0.00255728	TCONS_00141957	-0.774058	0.00312816
212	novel_miR_107	NM_001009311.1	-0.783745	0.00255728	TCONS_00031327	-0.753957	0.00461734
213	novel_miR_107	NM_001009311.1	-0.783745	0.00255728	XR_001434310.1	-0.761942	0.0039729
214	novel_miR_107	NM_001009311.1	-0.783745	0.00255728	XR_001020665.1	-0.805433	0.00156787
215	novel_miR_107	NM_001009311.1	-0.783745	0.00255728	TCONS_00131648	-0.761342	0.00401882
216	novel_miR_107	NM_001009802.1	-0.805933	0.00154922	TCONS_00036066	-0.786249	0.00242361
217	novel_miR_107	NM_001009802.1	-0.805933	0.00154922	XR_001020640.1	-0.844172	0.000553636
218	novel_miR_107	NM_001009802.1	-0.805933	0.00154922	TCONS_00069454	-0.763097	0.00388568
219	novel_miR_107	NM_001009802.1	-0.805933	0.00154922	XR_001040147.1	-0.807487	0.00149234
220	novel_miR_107	NM_001009802.1	-0.805933	0.00154922	TCONS_00044884	-0.845386	0.00053355
221	novel_miR_107	NM_001009802.1	-0.805933	0.00154922	XR_001435667.1	-0.75355	0.00465219
222	novel_miR_107	NM_001009802.1	-0.805933	0.00154922	TCONS_00252671	-0.827264	0.000899211
223	novel_miR_107	NM_001009802.1	-0.805933	0.00154922	XR_001023088.2	-0.764597	0.00377457
224	novel_miR_107	NM_001009802.1	-0.805933	0.00154922	TCONS_00239843	-0.755065	0.00452355
225	novel_miR_107	NM_001009802.1	-0.805933	0.00154922	TCONS_00041506	-0.89211	9.58133e-05
226	novel_miR_107	NM_001009802.1	-0.805933	0.00154922	XR_001020666.1	-0.775855	0.00301558
227	novel_miR_107	NM_001009802.1	-0.805933	0.00154922	TCONS_00076541	-0.767467	0.00356866
228	novel_miR_107	NM_001009802.1	-0.805933	0.00154922	TCONS_00031761	-0.793732	0.00205575
229	novel_miR_107	NM_001009802.1	-0.805933	0.00154922	XR_001027589.2	-0.7792	0.00281426
230	novel_miR_107	NM_001009802.1	-0.805933	0.00154922	XR_001435326.1	-0.864771	0.000282569
231	novel_miR_107	NM_001009802.1	-0.805933	0.00154922	TCONS_00153481	-0.804097	0.00161856
232	novel_miR_107	NM_001009802.1	-0.805933	0.00154922	TCONS_00236914	-0.890954	0.000100855
233	novel_miR_107	NM_001009802.1	-0.805933	0.00154922	TCONS_00212250	-0.847071	0.000506602
234	novel_miR_107	NM_001009802.1	-0.805933	0.00154922	XR_001434340.1	-0.803545	0.00163987
235	novel_miR_107	NM_001009802.1	-0.805933	0.00154922	XR_001433783.1	-0.787632	0.00235212
236	novel_miR_107	NM_001009802.1	-0.805933	0.00154922	XR_001434835.1	-0.831497	0.00080032
237	novel_miR_107	NM_001009802.1	-0.805933	0.00154922	TCONS_00236310	-0.79568	0.0019674
238	novel_miR_107	NM_001009802.1	-0.805933	0.00154922	TCONS_00241499	-0.753529	0.00465397
239	novel_miR_107	NM_001009802.1	-0.805933	0.00154922	TCONS_00230196	-0.820656	0.00107214
240	novel_miR_107	NM_001009802.1	-0.805933	0.00154922	TCONS_00133875	-0.767819	0.00354403
241	novel_miR_107	NM_001009802.1	-0.805933	0.00154922	TCONS_00034389	-0.821224	0.00105635
242	novel_miR_107	NM_001009802.1	-0.805933	0.00154922	TCONS_00134316	-0.821492	0.00104896
243	novel_miR_107	NM_001009802.1	-0.805933	0.00154922	TCONS_00189385	-0.797246	0.0018985
244	novel_miR_107	NM_001009802.1	-0.805933	0.00154922	TCONS_00049925	-0.778647	0.00284682
245	novel_miR_107	NM_001009802.1	-0.805933	0.00154922	TCONS_00167826	-0.778497	0.00285568
246	novel_miR_107	NM_001009802.1	-0.805933	0.00154922	TCONS_00160089	-0.755545	0.00448335
247	novel_miR_107	NM_001009802.1	-0.805933	0.00154922	TCONS_00095610	-0.852701	0.000424174
248	novel_miR_107	NM_001009802.1	-0.805933	0.00154922	TCONS_00144266	-0.77595	0.00300974
249	novel_miR_107	NM_001009802.1	-0.805933	0.00154922	TCONS_00219965	-0.76337	0.00386531
250	novel_miR_107	NM_001009802.1	-0.805933	0.00154922	TCONS_00060947	-0.815421	0.00122648
251	novel_miR_107	NM_001009802.1	-0.805933	0.00154922	TCONS_00075841	-0.755755	0.00446581
252	novel_miR_107	NM_001009802.1	-0.805933	0.00154922	TCONS_00022887	-0.77671	0.00296308
253	novel_miR_107	NM_001009802.1	-0.805933	0.00154922	TCONS_00112492	-0.76451	0.00378091
254	novel_miR_107	NM_001009802.1	-0.805933	0.00154922	TCONS_00141957	-0.774058	0.00312816
255	novel_miR_107	NM_001009802.1	-0.805933	0.00154922	TCONS_00031327	-0.753957	0.00461734
256	novel_miR_107	NM_001009802.1	-0.805933	0.00154922	XR_001434310.1	-0.761942	0.0039729
257	novel_miR_107	NM_001009802.1	-0.805933	0.00154922	XR_001020665.1	-0.805433	0.00156787
258	novel_miR_107	NM_001009802.1	-0.805933	0.00154922	TCONS_00131648	-0.761342	0.00401882
259	novel_miR_107	XM_004018003.3	-0.829637	0.000842663	TCONS_00036066	-0.786249	0.00242361
260	novel_miR_107	XM_004018003.3	-0.829637	0.000842663	XR_001020640.1	-0.844172	0.000553636
261	novel_miR_107	XM_004018003.3	-0.829637	0.000842663	TCONS_00069454	-0.763097	0.00388568
262	novel_miR_107	XM_004018003.3	-0.829637	0.000842663	XR_001040147.1	-0.807487	0.00149234
263	novel_miR_107	XM_004018003.3	-0.829637	0.000842663	TCONS_00044884	-0.845386	0.00053355
264	novel_miR_107	XM_004018003.3	-0.829637	0.000842663	XR_001435667.1	-0.75355	0.00465219
265	novel_miR_107	XM_004018003.3	-0.829637	0.000842663	TCONS_00252671	-0.827264	0.000899211
266	novel_miR_107	XM_004018003.3	-0.829637	0.000842663	XR_001023088.2	-0.764597	0.00377457
267	novel_miR_107	XM_004018003.3	-0.829637	0.000842663	TCONS_00239843	-0.755065	0.00452355
268	novel_miR_107	XM_004018003.3	-0.829637	0.000842663	TCONS_00041506	-0.89211	9.58133e-05
269	novel_miR_107	XM_004018003.3	-0.829637	0.000842663	XR_001020666.1	-0.775855	0.00301558
270	novel_miR_107	XM_004018003.3	-0.829637	0.000842663	TCONS_00076541	-0.767467	0.00356866
271	novel_miR_107	XM_004018003.3	-0.829637	0.000842663	TCONS_00031761	-0.793732	0.00205575
272	novel_miR_107	XM_004018003.3	-0.829637	0.000842663	XR_001027589.2	-0.7792	0.00281426
273	novel_miR_107	XM_004018003.3	-0.829637	0.000842663	XR_001435326.1	-0.864771	0.000282569
274	novel_miR_107	XM_004018003.3	-0.829637	0.000842663	TCONS_00153481	-0.804097	0.00161856
275	novel_miR_107	XM_004018003.3	-0.829637	0.000842663	TCONS_00236914	-0.890954	0.000100855
276	novel_miR_107	XM_004018003.3	-0.829637	0.000842663	TCONS_00212250	-0.847071	0.000506602
277	novel_miR_107	XM_004018003.3	-0.829637	0.000842663	XR_001434340.1	-0.803545	0.00163987
278	novel_miR_107	XM_004018003.3	-0.829637	0.000842663	XR_001433783.1	-0.787632	0.00235212
279	novel_miR_107	XM_004018003.3	-0.829637	0.000842663	XR_001434835.1	-0.831497	0.00080032
280	novel_miR_107	XM_004018003.3	-0.829637	0.000842663	TCONS_00236310	-0.79568	0.0019674
281	novel_miR_107	XM_004018003.3	-0.829637	0.000842663	TCONS_00241499	-0.753529	0.00465397
282	novel_miR_107	XM_004018003.3	-0.829637	0.000842663	TCONS_00230196	-0.820656	0.00107214
283	novel_miR_107	XM_004018003.3	-0.829637	0.000842663	TCONS_00133875	-0.767819	0.00354403
284	novel_miR_107	XM_004018003.3	-0.829637	0.000842663	TCONS_00034389	-0.821224	0.00105635
285	novel_miR_107	XM_004018003.3	-0.829637	0.000842663	TCONS_00134316	-0.821492	0.00104896
286	novel_miR_107	XM_004018003.3	-0.829637	0.000842663	TCONS_00189385	-0.797246	0.0018985
287	novel_miR_107	XM_004018003.3	-0.829637	0.000842663	TCONS_00049925	-0.778647	0.00284682
288	novel_miR_107	XM_004018003.3	-0.829637	0.000842663	TCONS_00167826	-0.778497	0.00285568
289	novel_miR_107	XM_004018003.3	-0.829637	0.000842663	TCONS_00160089	-0.755545	0.00448335
290	novel_miR_107	XM_004018003.3	-0.829637	0.000842663	TCONS_00095610	-0.852701	0.000424174
291	novel_miR_107	XM_004018003.3	-0.829637	0.000842663	TCONS_00144266	-0.77595	0.00300974
292	novel_miR_107	XM_004018003.3	-0.829637	0.000842663	TCONS_00219965	-0.76337	0.00386531
293	novel_miR_107	XM_004018003.3	-0.829637	0.000842663	TCONS_00060947	-0.815421	0.00122648
294	novel_miR_107	XM_004018003.3	-0.829637	0.000842663	TCONS_00075841	-0.755755	0.00446581
295	novel_miR_107	XM_004018003.3	-0.829637	0.000842663	TCONS_00022887	-0.77671	0.00296308
296	novel_miR_107	XM_004018003.3	-0.829637	0.000842663	TCONS_00112492	-0.76451	0.00378091
297	novel_miR_107	XM_004018003.3	-0.829637	0.000842663	TCONS_00141957	-0.774058	0.00312816
298	novel_miR_107	XM_004018003.3	-0.829637	0.000842663	TCONS_00031327	-0.753957	0.00461734
299	novel_miR_107	XM_004018003.3	-0.829637	0.000842663	XR_001434310.1	-0.761942	0.0039729
300	novel_miR_107	XM_004018003.3	-0.829637	0.000842663	XR_001020665.1	-0.805433	0.00156787
301	novel_miR_107	XM_004018003.3	-0.829637	0.000842663	TCONS_00131648	-0.761342	0.00401882
302	novel_miR_107	XM_004008666.3	-0.807872	0.0014785	TCONS_00036066	-0.786249	0.00242361
303	novel_miR_107	XM_004008666.3	-0.807872	0.0014785	XR_001020640.1	-0.844172	0.000553636
304	novel_miR_107	XM_004008666.3	-0.807872	0.0014785	TCONS_00069454	-0.763097	0.00388568
305	novel_miR_107	XM_004008666.3	-0.807872	0.0014785	XR_001040147.1	-0.807487	0.00149234
306	novel_miR_107	XM_004008666.3	-0.807872	0.0014785	TCONS_00044884	-0.845386	0.00053355
307	novel_miR_107	XM_004008666.3	-0.807872	0.0014785	XR_001435667.1	-0.75355	0.00465219
308	novel_miR_107	XM_004008666.3	-0.807872	0.0014785	TCONS_00252671	-0.827264	0.000899211
309	novel_miR_107	XM_004008666.3	-0.807872	0.0014785	XR_001023088.2	-0.764597	0.00377457
310	novel_miR_107	XM_004008666.3	-0.807872	0.0014785	TCONS_00239843	-0.755065	0.00452355
311	novel_miR_107	XM_004008666.3	-0.807872	0.0014785	TCONS_00041506	-0.89211	9.58133e-05
312	novel_miR_107	XM_004008666.3	-0.807872	0.0014785	XR_001020666.1	-0.775855	0.00301558
313	novel_miR_107	XM_004008666.3	-0.807872	0.0014785	TCONS_00076541	-0.767467	0.00356866
314	novel_miR_107	XM_004008666.3	-0.807872	0.0014785	TCONS_00031761	-0.793732	0.00205575
315	novel_miR_107	XM_004008666.3	-0.807872	0.0014785	XR_001027589.2	-0.7792	0.00281426
316	novel_miR_107	XM_004008666.3	-0.807872	0.0014785	XR_001435326.1	-0.864771	0.000282569
317	novel_miR_107	XM_004008666.3	-0.807872	0.0014785	TCONS_00153481	-0.804097	0.00161856
318	novel_miR_107	XM_004008666.3	-0.807872	0.0014785	TCONS_00236914	-0.890954	0.000100855
319	novel_miR_107	XM_004008666.3	-0.807872	0.0014785	TCONS_00212250	-0.847071	0.000506602
320	novel_miR_107	XM_004008666.3	-0.807872	0.0014785	XR_001434340.1	-0.803545	0.00163987
321	novel_miR_107	XM_004008666.3	-0.807872	0.0014785	XR_001433783.1	-0.787632	0.00235212
322	novel_miR_107	XM_004008666.3	-0.807872	0.0014785	XR_001434835.1	-0.831497	0.00080032
323	novel_miR_107	XM_004008666.3	-0.807872	0.0014785	TCONS_00236310	-0.79568	0.0019674
324	novel_miR_107	XM_004008666.3	-0.807872	0.0014785	TCONS_00241499	-0.753529	0.00465397
325	novel_miR_107	XM_004008666.3	-0.807872	0.0014785	TCONS_00230196	-0.820656	0.00107214
326	novel_miR_107	XM_004008666.3	-0.807872	0.0014785	TCONS_00133875	-0.767819	0.00354403
327	novel_miR_107	XM_004008666.3	-0.807872	0.0014785	TCONS_00034389	-0.821224	0.00105635
328	novel_miR_107	XM_004008666.3	-0.807872	0.0014785	TCONS_00134316	-0.821492	0.00104896
329	novel_miR_107	XM_004008666.3	-0.807872	0.0014785	TCONS_00189385	-0.797246	0.0018985
330	novel_miR_107	XM_004008666.3	-0.807872	0.0014785	TCONS_00049925	-0.778647	0.00284682
331	novel_miR_107	XM_004008666.3	-0.807872	0.0014785	TCONS_00167826	-0.778497	0.00285568
332	novel_miR_107	XM_004008666.3	-0.807872	0.0014785	TCONS_00160089	-0.755545	0.00448335
333	novel_miR_107	XM_004008666.3	-0.807872	0.0014785	TCONS_00095610	-0.852701	0.000424174
334	novel_miR_107	XM_004008666.3	-0.807872	0.0014785	TCONS_00144266	-0.77595	0.00300974
335	novel_miR_107	XM_004008666.3	-0.807872	0.0014785	TCONS_00219965	-0.76337	0.00386531
336	novel_miR_107	XM_004008666.3	-0.807872	0.0014785	TCONS_00060947	-0.815421	0.00122648
337	novel_miR_107	XM_004008666.3	-0.807872	0.0014785	TCONS_00075841	-0.755755	0.00446581
338	novel_miR_107	XM_004008666.3	-0.807872	0.0014785	TCONS_00022887	-0.77671	0.00296308
339	novel_miR_107	XM_004008666.3	-0.807872	0.0014785	TCONS_00112492	-0.76451	0.00378091
340	novel_miR_107	XM_004008666.3	-0.807872	0.0014785	TCONS_00141957	-0.774058	0.00312816
341	novel_miR_107	XM_004008666.3	-0.807872	0.0014785	TCONS_00031327	-0.753957	0.00461734
342	novel_miR_107	XM_004008666.3	-0.807872	0.0014785	XR_001434310.1	-0.761942	0.0039729
343	novel_miR_107	XM_004008666.3	-0.807872	0.0014785	XR_001020665.1	-0.805433	0.00156787
344	novel_miR_107	XM_004008666.3	-0.807872	0.0014785	TCONS_00131648	-0.761342	0.00401882
345	novel_miR_107	XM_004008562.3	-0.825525	0.000942463	TCONS_00036066	-0.786249	0.00242361
346	novel_miR_107	XM_004008562.3	-0.825525	0.000942463	XR_001020640.1	-0.844172	0.000553636
347	novel_miR_107	XM_004008562.3	-0.825525	0.000942463	TCONS_00069454	-0.763097	0.00388568
348	novel_miR_107	XM_004008562.3	-0.825525	0.000942463	XR_001040147.1	-0.807487	0.00149234
349	novel_miR_107	XM_004008562.3	-0.825525	0.000942463	TCONS_00044884	-0.845386	0.00053355
350	novel_miR_107	XM_004008562.3	-0.825525	0.000942463	XR_001435667.1	-0.75355	0.00465219
351	novel_miR_107	XM_004008562.3	-0.825525	0.000942463	TCONS_00252671	-0.827264	0.000899211
352	novel_miR_107	XM_004008562.3	-0.825525	0.000942463	XR_001023088.2	-0.764597	0.00377457
353	novel_miR_107	XM_004008562.3	-0.825525	0.000942463	TCONS_00239843	-0.755065	0.00452355
354	novel_miR_107	XM_004008562.3	-0.825525	0.000942463	TCONS_00041506	-0.89211	9.58133e-05
355	novel_miR_107	XM_004008562.3	-0.825525	0.000942463	XR_001020666.1	-0.775855	0.00301558
356	novel_miR_107	XM_004008562.3	-0.825525	0.000942463	TCONS_00076541	-0.767467	0.00356866
357	novel_miR_107	XM_004008562.3	-0.825525	0.000942463	TCONS_00031761	-0.793732	0.00205575
358	novel_miR_107	XM_004008562.3	-0.825525	0.000942463	XR_001027589.2	-0.7792	0.00281426
359	novel_miR_107	XM_004008562.3	-0.825525	0.000942463	XR_001435326.1	-0.864771	0.000282569
360	novel_miR_107	XM_004008562.3	-0.825525	0.000942463	TCONS_00153481	-0.804097	0.00161856
361	novel_miR_107	XM_004008562.3	-0.825525	0.000942463	TCONS_00236914	-0.890954	0.000100855
362	novel_miR_107	XM_004008562.3	-0.825525	0.000942463	TCONS_00212250	-0.847071	0.000506602
363	novel_miR_107	XM_004008562.3	-0.825525	0.000942463	XR_001434340.1	-0.803545	0.00163987
364	novel_miR_107	XM_004008562.3	-0.825525	0.000942463	XR_001433783.1	-0.787632	0.00235212
365	novel_miR_107	XM_004008562.3	-0.825525	0.000942463	XR_001434835.1	-0.831497	0.00080032
366	novel_miR_107	XM_004008562.3	-0.825525	0.000942463	TCONS_00236310	-0.79568	0.0019674
367	novel_miR_107	XM_004008562.3	-0.825525	0.000942463	TCONS_00241499	-0.753529	0.00465397
368	novel_miR_107	XM_004008562.3	-0.825525	0.000942463	TCONS_00230196	-0.820656	0.00107214
369	novel_miR_107	XM_004008562.3	-0.825525	0.000942463	TCONS_00133875	-0.767819	0.00354403
370	novel_miR_107	XM_004008562.3	-0.825525	0.000942463	TCONS_00034389	-0.821224	0.00105635
371	novel_miR_107	XM_004008562.3	-0.825525	0.000942463	TCONS_00134316	-0.821492	0.00104896
372	novel_miR_107	XM_004008562.3	-0.825525	0.000942463	TCONS_00189385	-0.797246	0.0018985
373	novel_miR_107	XM_004008562.3	-0.825525	0.000942463	TCONS_00049925	-0.778647	0.00284682
374	novel_miR_107	XM_004008562.3	-0.825525	0.000942463	TCONS_00167826	-0.778497	0.00285568
375	novel_miR_107	XM_004008562.3	-0.825525	0.000942463	TCONS_00160089	-0.755545	0.00448335
376	novel_miR_107	XM_004008562.3	-0.825525	0.000942463	TCONS_00095610	-0.852701	0.000424174
377	novel_miR_107	XM_004008562.3	-0.825525	0.000942463	TCONS_00144266	-0.77595	0.00300974
378	novel_miR_107	XM_004008562.3	-0.825525	0.000942463	TCONS_00219965	-0.76337	0.00386531
379	novel_miR_107	XM_004008562.3	-0.825525	0.000942463	TCONS_00060947	-0.815421	0.00122648
380	novel_miR_107	XM_004008562.3	-0.825525	0.000942463	TCONS_00075841	-0.755755	0.00446581
381	novel_miR_107	XM_004008562.3	-0.825525	0.000942463	TCONS_00022887	-0.77671	0.00296308
382	novel_miR_107	XM_004008562.3	-0.825525	0.000942463	TCONS_00112492	-0.76451	0.00378091
383	novel_miR_107	XM_004008562.3	-0.825525	0.000942463	TCONS_00141957	-0.774058	0.00312816
384	novel_miR_107	XM_004008562.3	-0.825525	0.000942463	TCONS_00031327	-0.753957	0.00461734
385	novel_miR_107	XM_004008562.3	-0.825525	0.000942463	XR_001434310.1	-0.761942	0.0039729
386	novel_miR_107	XM_004008562.3	-0.825525	0.000942463	XR_001020665.1	-0.805433	0.00156787
387	novel_miR_107	XM_004008562.3	-0.825525	0.000942463	TCONS_00131648	-0.761342	0.00401882
388	novel_miR_119	XM_004018441.3	-0.758524	0.00423979	TCONS_00085045	-0.840033	0.000626551
389	novel_miR_119	XM_004018441.3	-0.758524	0.00423979	TCONS_00153736	-0.790878	0.00219062
390	novel_miR_119	XM_004018441.3	-0.758524	0.00423979	TCONS_00173646	-0.857916	0.000357488
391	novel_miR_119	XM_004018441.3	-0.758524	0.00423979	TCONS_00144398	-0.760132	0.00411263
392	novel_miR_119	XM_004018441.3	-0.758524	0.00423979	TCONS_00047026	-0.779305	0.00280811
393	novel_miR_119	XM_004018441.3	-0.758524	0.00423979	TCONS_00232842	-0.781361	0.00268975
394	novel_miR_119	XM_004018441.3	-0.758524	0.00423979	XR_001044462.2	-0.812535	0.00131857
395	novel_miR_119	XM_004018441.3	-0.758524	0.00423979	TCONS_00232839	-0.773096	0.00318971
396	novel_miR_119	XM_004018441.3	-0.758524	0.00423979	TCONS_00236914	-0.758893	0.00421041
397	novel_miR_119	XM_004018441.3	-0.758524	0.00423979	TCONS_00058655	-0.777376	0.00292271
398	novel_miR_119	XM_004018441.3	-0.758524	0.00423979	XR_001041343.2	-0.774734	0.00308546
399	novel_miR_119	XM_004018441.3	-0.758524	0.00423979	TCONS_00046849	-0.764782	0.00376103
400	novel_miR_119	XM_004018441.3	-0.758524	0.00423979	TCONS_00224592	-0.761479	0.00400829
401	novel_miR_119	XM_004018441.3	-0.758524	0.00423979	TCONS_00219965	-0.809216	0.00143098
402	novel_miR_119	XM_004018441.3	-0.758524	0.00423979	TCONS_00242989	-0.79072	0.00219825
403	novel_miR_119	XM_004018441.3	-0.758524	0.00423979	TCONS_00137388	-0.790583	0.00220492
404	novel_miR_119	XM_004018441.3	-0.758524	0.00423979	TCONS_00130341	-0.803679	0.00163468
405	novel_miR_119	XM_004018441.3	-0.758524	0.00423979	TCONS_00214412	-0.769596	0.00342156
406	novel_miR_119	XM_004018441.3	-0.758524	0.00423979	TCONS_00097898	-0.759151	0.00418985
407	novel_miR_119	XM_004018441.3	-0.758524	0.00423979	TCONS_00219239	-0.75731	0.0043378
408	novel_miR_119	XM_004018441.3	-0.758524	0.00423979	TCONS_00132849	-0.777814	0.00289639
409	novel_miR_119	XM_004018441.3	-0.758524	0.00423979	TCONS_00036883	-0.751505	0.00483028
410	novel_miR_119	XM_004018441.3	-0.758524	0.00423979	TCONS_00089258	-0.771092	0.00332097
411	novel_miR_119	XM_004018441.3	-0.758524	0.00423979	TCONS_00045106	-0.751087	0.00486727
412	novel_miR_119	XM_004018441.3	-0.758524	0.00423979	TCONS_00088570	-0.768709	0.00348226
413	novel_miR_119	XM_004018441.3	-0.758524	0.00423979	TCONS_00238019	-0.756022	0.00444365
414	novel_miR_119	XM_004018441.3	-0.758524	0.00423979	TCONS_00154093	-0.765513	0.00370792
415	novel_miR_158	XM_004005588.3	-0.774706	0.00308719	TCONS_00168956	-0.799934	0.00178459
416	novel_miR_158	XM_004005588.3	-0.774706	0.00308719	TCONS_00215891	-0.764075	0.00381293
417	novel_miR_158	XM_004005588.3	-0.774706	0.00308719	TCONS_00145894	-0.786267	0.00242269
418	novel_miR_158	XM_004005588.3	-0.774706	0.00308719	TCONS_00228395	-0.750286	0.00493882
419	novel_miR_158	XM_004006553.2	-0.782176	0.00264389	TCONS_00168956	-0.799934	0.00178459
420	novel_miR_158	XM_004006553.2	-0.782176	0.00264389	TCONS_00215891	-0.764075	0.00381293
421	novel_miR_158	XM_004006553.2	-0.782176	0.00264389	TCONS_00145894	-0.786267	0.00242269
422	novel_miR_158	XM_004006553.2	-0.782176	0.00264389	TCONS_00228395	-0.750286	0.00493882
423	novel_miR_253	XM_015099465.1	-0.771515	0.00329291	TCONS_00048445	-0.781565	0.00267819
424	novel_miR_253	XM_015099465.1	-0.771515	0.00329291	XR_001039032.1	-0.753164	0.00468539
425	novel_miR_253	XM_015099465.1	-0.771515	0.00329291	TCONS_00148780	-0.794183	0.00203503
426	novel_miR_253	XM_015099465.1	-0.771515	0.00329291	TCONS_00144528	-0.817528	0.00116245
427	novel_miR_331	XM_015103710.1	-0.855319	0.000389582	TCONS_00235559	-0.759283	0.00417945
428	novel_miR_331	XM_015103710.1	-0.855319	0.000389582	TCONS_00118108	-0.764209	0.00380306
429	novel_miR_331	XM_015103710.1	-0.855319	0.000389582	TCONS_00228027	-0.759411	0.00416928
430	novel_miR_331	XM_015103710.1	-0.855319	0.000389582	TCONS_00087474	-0.750267	0.00494051
431	novel_miR_331	XM_015103710.1	-0.855319	0.000389582	XR_001021745.2	-0.855605	0.000385949
432	novel_miR_331	XM_015103710.1	-0.855319	0.000389582	TCONS_00255072	-0.806537	0.00152692
433	novel_miR_331	XM_015103710.1	-0.855319	0.000389582	XR_001435673.1	-0.86079	0.000324397
434	novel_miR_331	XM_004014932.3	-0.766789	0.00361653	TCONS_00235559	-0.759283	0.00417945
435	novel_miR_331	XM_004014932.3	-0.766789	0.00361653	TCONS_00118108	-0.764209	0.00380306
436	novel_miR_331	XM_004014932.3	-0.766789	0.00361653	TCONS_00228027	-0.759411	0.00416928
437	novel_miR_331	XM_004014932.3	-0.766789	0.00361653	TCONS_00087474	-0.750267	0.00494051
438	novel_miR_331	XM_004014932.3	-0.766789	0.00361653	XR_001021745.2	-0.855605	0.000385949
439	novel_miR_331	XM_004014932.3	-0.766789	0.00361653	TCONS_00255072	-0.806537	0.00152692
440	novel_miR_331	XM_004014932.3	-0.766789	0.00361653	XR_001435673.1	-0.86079	0.000324397
441	novel_miR_346	TCONS_00253389	-0.914821	3.05657e-05	TCONS_00049632	-0.781277	0.00269452
442	novel_miR_397	XM_004002328.3	-0.763567	0.00385059	TCONS_00037348	-0.768222	0.00351595
443	novel_miR_397	XM_004002328.3	-0.763567	0.00385059	XR_001022530.2	-0.850043	0.000461668
444	novel_miR_415	XM_015092289.1	-0.83493	0.000726465	TCONS_00096502	-0.867172	0.000259446
445	novel_miR_415	XM_015092289.1	-0.83493	0.000726465	TCONS_00184542	-0.783951	0.00254609
446	novel_miR_415	XM_015092289.1	-0.83493	0.000726465	TCONS_00012856	-0.794065	0.00204042
447	novel_miR_415	XM_015103858.1	-0.754134	0.00460227	TCONS_00096502	-0.867172	0.000259446
448	novel_miR_415	XM_015103858.1	-0.754134	0.00460227	TCONS_00184542	-0.783951	0.00254609
449	novel_miR_415	XM_015103858.1	-0.754134	0.00460227	TCONS_00012856	-0.794065	0.00204042
450	novel_miR_415	XM_012177604.2	-0.902381	5.91451e-05	TCONS_00096502	-0.867172	0.000259446
451	novel_miR_415	XM_012177604.2	-0.902381	5.91451e-05	TCONS_00184542	-0.783951	0.00254609
452	novel_miR_415	XM_012177604.2	-0.902381	5.91451e-05	TCONS_00012856	-0.794065	0.00204042
453	novel_miR_422	XM_012095451.2	-0.758726	0.0042237	TCONS_00219965	-0.775015	0.00306781
454	novel_miR_422	XM_012095451.2	-0.758726	0.0042237	TCONS_00139767	-0.759646	0.0041508
455	novel_miR_433	XM_004012495.3	-0.837977	0.000665426	TCONS_00087967	-0.812698	0.00131323
456	novel_miR_433	XM_004012495.3	-0.837977	0.000665426	TCONS_00030125	-0.801181	0.00173355
457	novel_miR_433	XM_004012495.3	-0.837977	0.000665426	XR_001023367.1	-0.788451	0.00231051
458	novel_miR_433	XM_004012495.3	-0.837977	0.000665426	TCONS_00067319	-0.757573	0.00431641
459	novel_miR_433	XM_004012495.3	-0.837977	0.000665426	XR_001034079.2	-0.880996	0.000153433
460	novel_miR_433	XM_015092237.1	-0.757214	0.0043456	TCONS_00087967	-0.812698	0.00131323
461	novel_miR_433	XM_015092237.1	-0.757214	0.0043456	TCONS_00030125	-0.801181	0.00173355
462	novel_miR_433	XM_015092237.1	-0.757214	0.0043456	XR_001023367.1	-0.788451	0.00231051
463	novel_miR_433	XM_015092237.1	-0.757214	0.0043456	TCONS_00067319	-0.757573	0.00431641
464	novel_miR_433	XM_015092237.1	-0.757214	0.0043456	XR_001034079.2	-0.880996	0.000153433
465	novel_miR_433	XM_004014424.3	-0.755217	0.00451079	TCONS_00087967	-0.812698	0.00131323
466	novel_miR_433	XM_004014424.3	-0.755217	0.00451079	TCONS_00030125	-0.801181	0.00173355
467	novel_miR_433	XM_004014424.3	-0.755217	0.00451079	XR_001023367.1	-0.788451	0.00231051
468	novel_miR_433	XM_004014424.3	-0.755217	0.00451079	TCONS_00067319	-0.757573	0.00431641
469	novel_miR_433	XM_004014424.3	-0.755217	0.00451079	XR_001034079.2	-0.880996	0.000153433
470	novel_miR_68	XM_012162273.1	-0.798525	0.00184361	XR_001039929.2	-0.759329	0.00417576
471	novel_miR_77	NM_001114766.1	-0.869294	0.000240271	TCONS_00101436	-0.788681	0.00229895
472	novel_miR_77	NM_001114766.1	-0.869294	0.000240271	TCONS_00091944	-0.754424	0.00457765
473	novel_miR_77	NM_001114766.1	-0.869294	0.000240271	TCONS_00064521	-0.795585	0.00197164
474	novel_miR_77	NM_001114766.1	-0.869294	0.000240271	TCONS_00087967	-0.856591	0.000373602
475	novel_miR_77	NM_001114766.1	-0.869294	0.000240271	TCONS_00011143	-0.787393	0.00236435
476	novel_miR_77	NM_001114766.1	-0.869294	0.000240271	XR_001434416.1	-0.783691	0.00256023
477	oar-miR-133	XM_004022156.2	-0.831769	0.000794256	TCONS_00160920	-0.777647	0.00290643
478	oar-miR-133	XM_004022156.2	-0.831769	0.000794256	TCONS_00014389	-0.783493	0.00257105
479	oar-miR-133	XM_004022156.2	-0.831769	0.000794256	TCONS_00043780	-0.85637	0.000376336
480	oar-miR-133	XM_004022156.2	-0.831769	0.000794256	TCONS_00043778	-0.843433	0.000566137
481	oar-miR-133	XM_004022156.2	-0.831769	0.000794256	TCONS_00149208	-0.786103	0.00243126
482	oar-miR-133	XM_004022156.2	-0.831769	0.000794256	XR_001435931.1	-0.819731	0.00109827
483	oar-miR-133	XM_004022156.2	-0.831769	0.000794256	TCONS_00058843	-0.757722	0.0043044
484	oar-miR-133	XM_004022156.2	-0.831769	0.000794256	TCONS_00151893	-0.765139	0.00373503
485	oar-miR-133	XM_004022156.2	-0.831769	0.000794256	TCONS_00091411	-0.754908	0.00453669
486	oar-miR-133	XM_004018944.3	-0.75937	0.00417255	TCONS_00160920	-0.777647	0.00290643
487	oar-miR-133	XM_004018944.3	-0.75937	0.00417255	TCONS_00014389	-0.783493	0.00257105
488	oar-miR-133	XM_004018944.3	-0.75937	0.00417255	TCONS_00043780	-0.85637	0.000376336
489	oar-miR-133	XM_004018944.3	-0.75937	0.00417255	TCONS_00043778	-0.843433	0.000566137
490	oar-miR-133	XM_004018944.3	-0.75937	0.00417255	TCONS_00149208	-0.786103	0.00243126
491	oar-miR-133	XM_004018944.3	-0.75937	0.00417255	XR_001435931.1	-0.819731	0.00109827
492	oar-miR-133	XM_004018944.3	-0.75937	0.00417255	TCONS_00058843	-0.757722	0.0043044
493	oar-miR-133	XM_004018944.3	-0.75937	0.00417255	TCONS_00151893	-0.765139	0.00373503
494	oar-miR-133	XM_004018944.3	-0.75937	0.00417255	TCONS_00091411	-0.754908	0.00453669
495	oar-miR-133	XM_015093814.1	-0.790635	0.00220239	TCONS_00160920	-0.777647	0.00290643
496	oar-miR-133	XM_015093814.1	-0.790635	0.00220239	TCONS_00014389	-0.783493	0.00257105
497	oar-miR-133	XM_015093814.1	-0.790635	0.00220239	TCONS_00043780	-0.85637	0.000376336
498	oar-miR-133	XM_015093814.1	-0.790635	0.00220239	TCONS_00043778	-0.843433	0.000566137
499	oar-miR-133	XM_015093814.1	-0.790635	0.00220239	TCONS_00149208	-0.786103	0.00243126
500	oar-miR-133	XM_015093814.1	-0.790635	0.00220239	XR_001435931.1	-0.819731	0.00109827
501	oar-miR-133	XM_015093814.1	-0.790635	0.00220239	TCONS_00058843	-0.757722	0.0043044
502	oar-miR-133	XM_015093814.1	-0.790635	0.00220239	TCONS_00151893	-0.765139	0.00373503
503	oar-miR-133	XM_015093814.1	-0.790635	0.00220239	TCONS_00091411	-0.754908	0.00453669
504	oar-miR-133	XM_015099278.1	-0.773614	0.0031565	TCONS_00160920	-0.777647	0.00290643
505	oar-miR-133	XM_015099278.1	-0.773614	0.0031565	TCONS_00014389	-0.783493	0.00257105
506	oar-miR-133	XM_015099278.1	-0.773614	0.0031565	TCONS_00043780	-0.85637	0.000376336
507	oar-miR-133	XM_015099278.1	-0.773614	0.0031565	TCONS_00043778	-0.843433	0.000566137
508	oar-miR-133	XM_015099278.1	-0.773614	0.0031565	TCONS_00149208	-0.786103	0.00243126
509	oar-miR-133	XM_015099278.1	-0.773614	0.0031565	XR_001435931.1	-0.819731	0.00109827
510	oar-miR-133	XM_015099278.1	-0.773614	0.0031565	TCONS_00058843	-0.757722	0.0043044
511	oar-miR-133	XM_015099278.1	-0.773614	0.0031565	TCONS_00151893	-0.765139	0.00373503
512	oar-miR-133	XM_015099278.1	-0.773614	0.0031565	TCONS_00091411	-0.754908	0.00453669
513	oar-miR-133	XM_012186499.2	-0.876213	0.000185292	TCONS_00160920	-0.777647	0.00290643
514	oar-miR-133	XM_012186499.2	-0.876213	0.000185292	TCONS_00014389	-0.783493	0.00257105
515	oar-miR-133	XM_012186499.2	-0.876213	0.000185292	TCONS_00043780	-0.85637	0.000376336
516	oar-miR-133	XM_012186499.2	-0.876213	0.000185292	TCONS_00043778	-0.843433	0.000566137
517	oar-miR-133	XM_012186499.2	-0.876213	0.000185292	TCONS_00149208	-0.786103	0.00243126
518	oar-miR-133	XM_012186499.2	-0.876213	0.000185292	XR_001435931.1	-0.819731	0.00109827
519	oar-miR-133	XM_012186499.2	-0.876213	0.000185292	TCONS_00058843	-0.757722	0.0043044
520	oar-miR-133	XM_012186499.2	-0.876213	0.000185292	TCONS_00151893	-0.765139	0.00373503
521	oar-miR-133	XM_012186499.2	-0.876213	0.000185292	TCONS_00091411	-0.754908	0.00453669
522	oar-miR-133	XM_012162273.1	-0.775987	0.00300743	TCONS_00160920	-0.777647	0.00290643
523	oar-miR-133	XM_012162273.1	-0.775987	0.00300743	TCONS_00014389	-0.783493	0.00257105
524	oar-miR-133	XM_012162273.1	-0.775987	0.00300743	TCONS_00043780	-0.85637	0.000376336
525	oar-miR-133	XM_012162273.1	-0.775987	0.00300743	TCONS_00043778	-0.843433	0.000566137
526	oar-miR-133	XM_012162273.1	-0.775987	0.00300743	TCONS_00149208	-0.786103	0.00243126
527	oar-miR-133	XM_012162273.1	-0.775987	0.00300743	XR_001435931.1	-0.819731	0.00109827
528	oar-miR-133	XM_012162273.1	-0.775987	0.00300743	TCONS_00058843	-0.757722	0.0043044
529	oar-miR-133	XM_012162273.1	-0.775987	0.00300743	TCONS_00151893	-0.765139	0.00373503
530	oar-miR-133	XM_012162273.1	-0.775987	0.00300743	TCONS_00091411	-0.754908	0.00453669
531	oar-miR-133	XM_004003298.3	-0.786397	0.00241589	TCONS_00160920	-0.777647	0.00290643
532	oar-miR-133	XM_004003298.3	-0.786397	0.00241589	TCONS_00014389	-0.783493	0.00257105
533	oar-miR-133	XM_004003298.3	-0.786397	0.00241589	TCONS_00043780	-0.85637	0.000376336
534	oar-miR-133	XM_004003298.3	-0.786397	0.00241589	TCONS_00043778	-0.843433	0.000566137
535	oar-miR-133	XM_004003298.3	-0.786397	0.00241589	TCONS_00149208	-0.786103	0.00243126
536	oar-miR-133	XM_004003298.3	-0.786397	0.00241589	XR_001435931.1	-0.819731	0.00109827
537	oar-miR-133	XM_004003298.3	-0.786397	0.00241589	TCONS_00058843	-0.757722	0.0043044
538	oar-miR-133	XM_004003298.3	-0.786397	0.00241589	TCONS_00151893	-0.765139	0.00373503
539	oar-miR-133	XM_004003298.3	-0.786397	0.00241589	TCONS_00091411	-0.754908	0.00453669
540	oar-miR-133	XM_012121770.2	-0.868032	0.000251535	TCONS_00160920	-0.777647	0.00290643
541	oar-miR-133	XM_012121770.2	-0.868032	0.000251535	TCONS_00014389	-0.783493	0.00257105
542	oar-miR-133	XM_012121770.2	-0.868032	0.000251535	TCONS_00043780	-0.85637	0.000376336
543	oar-miR-133	XM_012121770.2	-0.868032	0.000251535	TCONS_00043778	-0.843433	0.000566137
544	oar-miR-133	XM_012121770.2	-0.868032	0.000251535	TCONS_00149208	-0.786103	0.00243126
545	oar-miR-133	XM_012121770.2	-0.868032	0.000251535	XR_001435931.1	-0.819731	0.00109827
546	oar-miR-133	XM_012121770.2	-0.868032	0.000251535	TCONS_00058843	-0.757722	0.0043044
547	oar-miR-133	XM_012121770.2	-0.868032	0.000251535	TCONS_00151893	-0.765139	0.00373503
548	oar-miR-133	XM_012121770.2	-0.868032	0.000251535	TCONS_00091411	-0.754908	0.00453669
549	oar-miR-133	XM_015100595.1	-0.848105	0.000490598	TCONS_00160920	-0.777647	0.00290643
550	oar-miR-133	XM_015100595.1	-0.848105	0.000490598	TCONS_00014389	-0.783493	0.00257105
551	oar-miR-133	XM_015100595.1	-0.848105	0.000490598	TCONS_00043780	-0.85637	0.000376336
552	oar-miR-133	XM_015100595.1	-0.848105	0.000490598	TCONS_00043778	-0.843433	0.000566137
553	oar-miR-133	XM_015100595.1	-0.848105	0.000490598	TCONS_00149208	-0.786103	0.00243126
554	oar-miR-133	XM_015100595.1	-0.848105	0.000490598	XR_001435931.1	-0.819731	0.00109827
555	oar-miR-133	XM_015100595.1	-0.848105	0.000490598	TCONS_00058843	-0.757722	0.0043044
556	oar-miR-133	XM_015100595.1	-0.848105	0.000490598	TCONS_00151893	-0.765139	0.00373503
557	oar-miR-133	XM_015100595.1	-0.848105	0.000490598	TCONS_00091411	-0.754908	0.00453669
558	oar-miR-143	XM_015101753.1	-0.798381	0.00184972	XR_001434706.1	-0.756253	0.00442454
559	oar-miR-143	XM_015101753.1	-0.798381	0.00184972	XR_001435935.1	-0.770746	0.003344
560	oar-miR-143	XM_015101753.1	-0.798381	0.00184972	XR_001434560.1	-0.768711	0.00348214
561	oar-miR-143	XM_015101753.1	-0.798381	0.00184972	TCONS_00141378	-0.751679	0.00481491
562	oar-miR-323a-5p	XM_004018077.2	-0.78227	0.00263867	TCONS_00017271	-0.793918	0.00204715
563	oar-miR-323a-5p	XM_004018077.2	-0.78227	0.00263867	XR_001025571.2	-0.872042	0.000217093
564	oar-miR-323a-5p	XM_004018077.2	-0.78227	0.00263867	TCONS_00146886	-0.782676	0.00261606
565	oar-miR-323a-5p	XM_004018077.2	-0.78227	0.00263867	XR_001037724.2	-0.812223	0.00132885
566	oar-miR-323a-5p	XM_012180553.2	-0.786998	0.00238469	TCONS_00017271	-0.793918	0.00204715
567	oar-miR-323a-5p	XM_012180553.2	-0.786998	0.00238469	XR_001025571.2	-0.872042	0.000217093
568	oar-miR-323a-5p	XM_012180553.2	-0.786998	0.00238469	TCONS_00146886	-0.782676	0.00261606
569	oar-miR-323a-5p	XM_012180553.2	-0.786998	0.00238469	XR_001037724.2	-0.812223	0.00132885
570	oar-miR-323a-5p	XM_015098936.1	-0.828436	0.000870922	TCONS_00017271	-0.793918	0.00204715
571	oar-miR-323a-5p	XM_015098936.1	-0.828436	0.000870922	XR_001025571.2	-0.872042	0.000217093
572	oar-miR-323a-5p	XM_015098936.1	-0.828436	0.000870922	TCONS_00146886	-0.782676	0.00261606
573	oar-miR-323a-5p	XM_015098936.1	-0.828436	0.000870922	XR_001037724.2	-0.812223	0.00132885
574	oar-miR-323a-5p	NM_001305890.1	-0.843858	0.000558928	TCONS_00017271	-0.793918	0.00204715
575	oar-miR-323a-5p	NM_001305890.1	-0.843858	0.000558928	XR_001025571.2	-0.872042	0.000217093
576	oar-miR-323a-5p	NM_001305890.1	-0.843858	0.000558928	TCONS_00146886	-0.782676	0.00261606
577	oar-miR-323a-5p	NM_001305890.1	-0.843858	0.000558928	XR_001037724.2	-0.812223	0.00132885
578	oar-miR-329b-5p	XM_012098751.2	-0.778936	0.00282977	TCONS_00096594	-0.769351	0.0034382
579	oar-miR-329b-5p	XM_012098751.2	-0.778936	0.00282977	TCONS_00171767	-0.770936	0.00333132
580	oar-miR-329b-5p	XM_012098751.2	-0.778936	0.00282977	XR_001023625.1	-0.768128	0.00352246
581	oar-miR-329b-5p	XM_012098751.2	-0.778936	0.00282977	XR_001435672.1	-0.755501	0.004487
582	oar-miR-329b-5p	XM_012098751.2	-0.778936	0.00282977	TCONS_00131026	-0.844985	0.000540115
583	oar-miR-329b-5p	XM_012098751.2	-0.778936	0.00282977	TCONS_00042797	-0.776616	0.00296885
584	oar-miR-370-3p	XM_012103661.2	-0.822125	0.00103166	TCONS_00000496	-0.788909	0.00228754
585	oar-miR-370-3p	XM_012103661.2	-0.822125	0.00103166	TCONS_00243896	-0.817446	0.0011649
586	oar-miR-370-3p	XM_012103661.2	-0.822125	0.00103166	XR_001023367.1	-0.798663	0.00183778
587	oar-miR-370-3p	XM_004006380.3	-0.798262	0.00185479	TCONS_00000496	-0.788909	0.00228754
588	oar-miR-370-3p	XM_004006380.3	-0.798262	0.00185479	TCONS_00243896	-0.817446	0.0011649
589	oar-miR-370-3p	XM_004006380.3	-0.798262	0.00185479	XR_001023367.1	-0.798663	0.00183778
590	oar-miR-370-3p	XM_004021816.2	-0.772296	0.00324162	TCONS_00000496	-0.788909	0.00228754
591	oar-miR-370-3p	XM_004021816.2	-0.772296	0.00324162	TCONS_00243896	-0.817446	0.0011649
592	oar-miR-370-3p	XM_004021816.2	-0.772296	0.00324162	XR_001023367.1	-0.798663	0.00183778
593	oar-miR-370-3p	XM_015104981.1	-0.770665	0.00334943	TCONS_00000496	-0.788909	0.00228754
594	oar-miR-370-3p	XM_015104981.1	-0.770665	0.00334943	TCONS_00243896	-0.817446	0.0011649
595	oar-miR-370-3p	XM_015104981.1	-0.770665	0.00334943	XR_001023367.1	-0.798663	0.00183778
596	oar-miR-370-3p	XM_004008711.3	-0.765662	0.00369715	TCONS_00000496	-0.788909	0.00228754
597	oar-miR-370-3p	XM_004008711.3	-0.765662	0.00369715	TCONS_00243896	-0.817446	0.0011649
598	oar-miR-370-3p	XM_004008711.3	-0.765662	0.00369715	XR_001023367.1	-0.798663	0.00183778
599	oar-miR-370-3p	XM_012116960.2	-0.751551	0.00482623	TCONS_00000496	-0.788909	0.00228754
600	oar-miR-370-3p	XM_012116960.2	-0.751551	0.00482623	TCONS_00243896	-0.817446	0.0011649
601	oar-miR-370-3p	XM_012116960.2	-0.751551	0.00482623	XR_001023367.1	-0.798663	0.00183778
602	oar-miR-370-3p	XM_012189236.2	-0.769951	0.00339749	TCONS_00000496	-0.788909	0.00228754
603	oar-miR-370-3p	XM_012189236.2	-0.769951	0.00339749	TCONS_00243896	-0.817446	0.0011649
604	oar-miR-370-3p	XM_012189236.2	-0.769951	0.00339749	XR_001023367.1	-0.798663	0.00183778
605	oar-miR-370-3p	XM_004002735.2	-0.774706	0.00308723	TCONS_00000496	-0.788909	0.00228754
606	oar-miR-370-3p	XM_004002735.2	-0.774706	0.00308723	TCONS_00243896	-0.817446	0.0011649
607	oar-miR-370-3p	XM_004002735.2	-0.774706	0.00308723	XR_001023367.1	-0.798663	0.00183778
608	oar-miR-370-3p	XM_012104576.1	-0.815317	0.00122973	TCONS_00000496	-0.788909	0.00228754
609	oar-miR-370-3p	XM_012104576.1	-0.815317	0.00122973	TCONS_00243896	-0.817446	0.0011649
610	oar-miR-370-3p	XM_012104576.1	-0.815317	0.00122973	XR_001023367.1	-0.798663	0.00183778
611	oar-miR-370-3p	XM_015102476.1	-0.872544	0.000213056	TCONS_00000496	-0.788909	0.00228754
612	oar-miR-370-3p	XM_015102476.1	-0.872544	0.000213056	TCONS_00243896	-0.817446	0.0011649
613	oar-miR-370-3p	XM_015102476.1	-0.872544	0.000213056	XR_001023367.1	-0.798663	0.00183778
614	oar-miR-3956-3p	XM_004004135.3	-0.842422	0.00058362	TCONS_00189494	-0.771232	0.00331163
615	oar-miR-3956-5p	XM_015104005.1	-0.777098	0.00293951	TCONS_00182533	-0.753653	0.0046434
616	oar-miR-432	XM_012185387.2	-0.773132	0.00318745	TCONS_00230821	-0.775422	0.00304239
617	oar-miR-432	XM_012185387.2	-0.773132	0.00318745	TCONS_00072826	-0.771029	0.00332514
618	oar-miR-432	XM_012185387.2	-0.773132	0.00318745	TCONS_00112569	-0.760338	0.00409657
619	oar-miR-432	XM_004005867.3	-0.771426	0.00329882	TCONS_00230821	-0.775422	0.00304239
620	oar-miR-432	XM_004005867.3	-0.771426	0.00329882	TCONS_00072826	-0.771029	0.00332514
621	oar-miR-432	XM_004005867.3	-0.771426	0.00329882	TCONS_00112569	-0.760338	0.00409657
622	oar-miR-432	XM_012097183.1	-0.796072	0.00194996	TCONS_00230821	-0.775422	0.00304239
623	oar-miR-432	XM_012097183.1	-0.796072	0.00194996	TCONS_00072826	-0.771029	0.00332514
624	oar-miR-432	XM_012097183.1	-0.796072	0.00194996	TCONS_00112569	-0.760338	0.00409657
625	oar-miR-487a-3p	XM_004013554.3	-0.813268	0.0012947	TCONS_00124830	-0.778318	0.0028663
626	oar-miR-541-3p	XM_004006116.3	-0.756354	0.00441616	TCONS_00184100	-0.801304	0.00172855
627	oar-miR-541-3p	XM_004006116.3	-0.756354	0.00441616	TCONS_00060287	-0.815711	0.00121752
628	oar-miR-541-3p	XM_004006116.3	-0.756354	0.00441616	TCONS_00084995	-0.794216	0.00203349
629	oar-miR-541-3p	XM_004006116.3	-0.756354	0.00441616	TCONS_00156337	-0.759276	0.00417998
630	oar-miR-543-3p	XM_015100517.1	-0.824925	0.000957761	TCONS_00072826	-0.769272	0.00344365
